# Supplementary material for: Cell lineage-resolved embryonic morphological map reveals novel signaling regulating cell fate and size asymmetry
Source: Research Square preprint supplement (doi:10.21203/rs.3.rs-4664717/v1), 2024-08-30
Supplement: Supplementary file 1 [file Table S1.xlsx]

## Sheet: Table S
Segmentation algorithm	Manually annotated embryo sample	Developmental stage (total cell number)	Average Hausdorff distance	Average Dice score
CMap	WT_Sample1	101	0.0271582	0.944006
CMap	WT_Sample1	201	0.0262012	0.956979
CMap	WT_Sample1	300	0.0198245	0.967712
CMap	WT_Sample1	400	0.0230155	0.953648
CMap	WT_Sample1	495	0.0194546	0.947392
CMap	WT_Sample1	551	0.0233621	0.920429
CMap	WT_Sample7	100	0.034373	0.876153
CMap	WT_Sample7	203	0.0274343	0.953652
CMap	WT_Sample7	304	0.0234233	0.953249
CMap	WT_Sample7	400	0.0208193	0.957987
CMap	WT_Sample7	505	0.0199509	0.945086
CMap	WT_Sample7	552	0.024702	0.934639
CShaper	WT_Sample1	101	0.0485302	0.915479
CShaper	WT_Sample1	201	0.0435394	0.892053
CShaper	WT_Sample1	300	0.0439489	0.870309
CShaper	WT_Sample1	400	0.0579195	0.832316
CShaper	WT_Sample1	495	0.0585313	0.808119
CShaper	WT_Sample1	551	0.0604172	0.791733
CShaper	WT_Sample7	100	0.038524	0.927401
CShaper	WT_Sample7	203	0.0417125	0.896142
CShaper	WT_Sample7	304	0.0418206	0.876135
CShaper	WT_Sample7	400	0.0614351	0.824984
CShaper	WT_Sample7	505	0.0576532	0.807494
CShaper	WT_Sample7	552	0.0677643	0.769786
VNet	WT_Sample1	101	0.0426876	0.936943
VNet	WT_Sample1	201	0.0365351	0.913653
VNet	WT_Sample1	300	0.0326861	0.903155
VNet	WT_Sample1	400	0.0428916	0.873631
VNet	WT_Sample1	495	0.0468436	0.853467
VNet	WT_Sample1	551	0.0578818	0.822721
VNet	WT_Sample7	100	0.032164	0.943669
VNet	WT_Sample7	203	0.0359739	0.91689
VNet	WT_Sample7	304	0.0310215	0.907514
VNet	WT_Sample7	400	0.0425534	0.875427
VNet	WT_Sample7	505	0.0528083	0.838556
VNet	WT_Sample7	552	0.0659905	0.800077
StarDist3D	WT_Sample1	101	0.0648221	0.861278
StarDist3D	WT_Sample1	201	0.0532669	0.886276
StarDist3D	WT_Sample1	300	0.0436197	0.885107
StarDist3D	WT_Sample1	400	0.0437204	0.874384
StarDist3D	WT_Sample1	495	0.0441303	0.861669
StarDist3D	WT_Sample1	551	0.0461119	0.850978
StarDist3D	WT_Sample7	100	0.0663133	0.881269
StarDist3D	WT_Sample7	203	0.05457	0.88281
StarDist3D	WT_Sample7	304	0.0412754	0.889736
StarDist3D	WT_Sample7	400	0.0465024	0.870408
StarDist3D	WT_Sample7	505	0.0466135	0.860102
StarDist3D	WT_Sample7	552	0.0535216	0.835156
CellPose3D	WT_Sample1	101	0.0636874	0.893274
CellPose3D	WT_Sample1	201	0.0571046	0.866192
CellPose3D	WT_Sample1	300	0.0657332	0.844368
CellPose3D	WT_Sample1	400	0.0856495	0.780009
CellPose3D	WT_Sample1	495	0.103015	0.741248
CellPose3D	WT_Sample1	551	0.104398	0.695494
CellPose3D	WT_Sample7	100	0.0864126	0.878948
CellPose3D	WT_Sample7	203	0.0604716	0.861556
CellPose3D	WT_Sample7	304	0.05998	0.835269
CellPose3D	WT_Sample7	400	0.0900909	0.763373
CellPose3D	WT_Sample7	505	0.112506	0.693577
CellPose3D	WT_Sample7	552	0.13018	0.636833
3DCellSeg	WT_Sample1	101	0.138382	0.799547
3DCellSeg	WT_Sample1	201	0.102243	0.761357
3DCellSeg	WT_Sample1	300	0.0861587	0.761994
3DCellSeg	WT_Sample1	400	0.115344	0.698009
3DCellSeg	WT_Sample1	495	0.101135	0.696847
3DCellSeg	WT_Sample1	551	0.0948398	0.713088
3DCellSeg	WT_Sample7	100	0.138887	0.793697
3DCellSeg	WT_Sample7	203	0.115849	0.737126
3DCellSeg	WT_Sample7	304	0.0856421	0.772898
3DCellSeg	WT_Sample7	400	0.0925114	0.72322
3DCellSeg	WT_Sample7	505	0.091314	0.72663
3DCellSeg	WT_Sample7	552	0.090401	0.705581
