# Supplementary material for: Cell lineage-resolved embryonic morphological map reveals novel signaling regulating cell fate and size asymmetry
Source: Research Square preprint supplement (doi:10.21203/rs.3.rs-4664717/v1), 2024-08-30
Supplement: Supplementary file 3 [file Table S10.xlsx]

## Sheet: Table S
Embryo sample	Width of compressed cross-section	Height of compressed cross-section	Length perpendicular to compressed cross-section
Sample04	9.31828	26.8156	18.246
Sample05	9.41996	26.8077	18.2591
Sample06	9.77079	26.7861	18.2263
Sample07	9.47429	26.7913	18.2645
Sample08	9.07804	26.7965	18.2561
Sample09	9.4312	26.769	18.2653
Sample10	8.6773	26.7568	18.2878
Sample11	9.6939	26.7975	18.2552
Sample12	9.6939	26.7975	18.2552
Sample13	9.6939	26.7975	18.2552
Sample14	9.50113	26.8051	18.2226
Sample15	9.6939	26.7975	18.2552
Sample16	9.37958	26.8151	18.2512
Sample17	9.50414	26.8042	18.3209
Sample18	9.6939	26.7975	18.2552
Sample19	9.45522	26.863	18.1396
Sample20	9.46848	26.7834	18.2927
Note 1: The original data and quantitative estimation are obtained from J. Cao et al., Establishment of a morphological atlas of the Caenorhabditis elegans embryo using deep-learning-based 4D segmentation. Nat. Commun. 11, 6254 (2020). doi: 10.1038/s41467-020-19863-x; pmid: 33288755.
