# Supplementary material for: Cell lineage-resolved embryonic morphological map reveals novel signaling regulating cell fate and size asymmetry
Source: Research Square preprint supplement (doi:10.21203/rs.3.rs-4664717/v1), 2024-08-30
Supplement: Supplementary file 5 [file Table S11.xlsx]

## Sheet: Table S
Mother cell	Daughter cell (D1, a/l/d)	Daughter cell (D2, p/r/v)	Cell volume asymmetry in uncompressed embryos	Cell volume asymmetry in compressed embryos	Cell volume asymmetry change	Significance of Wilcoxon rank-sum test (one-sided) (non-significant or n.s., p > 0.1; *, p ≤ 0.1; **, p ≤ 0.05; ***, p ≤ 0.01; ****, p ≤ 0.001)
			[(VD1-VD2)/(VD1+VD2)]U	[(VD1-VD2)/(VD1+VD2)]C	[(VD1-VD2)/(VD1+VD2)]U - [(VD1-VD2)/(VD1+VD2)]C
ABarapapp'	ABarapappa'	ABarapappp'	-0.4506±0.0397'	-0.6305±0.0726'	0.1798'	****'
MSpapap'	MSpapapa'	MSpapapp'	-0.3449±0.0746'	-0.5090±0.0698'	0.1641'	****'
ABarapaap'	ABarapaapa'	ABarapaapp'	-0.3982±0.0591'	-0.5388±0.0664'	0.1407'	****'
ABaraaapp'	ABaraaappa'	ABaraaappp'	-0.1510±0.0911'	-0.2883±0.0389'	0.1373'	***'
ABpraapap'	ABpraapapa'	ABpraapapp'	-0.1721±0.0345'	-0.3074±0.1071'	0.1353'	***'
ABplppapp'	ABplppappa'	ABplppappp'	0.0162±0.0574'	0.1341±0.1958'	-0.1179'	***'
ABalaapp'	ABalaappa'	ABalaappp'	-0.1322±0.0682'	-0.2483±0.0646'	0.1161'	****'
ABalpappa'	ABalpappaa'	ABalpappap'	-0.2217±0.0376'	-0.3337±0.0751'	0.1120'	****'
ABalpaapp'	ABalpaappa'	ABalpaappp'	-0.1988±0.0377'	-0.3072±0.0675'	0.1084'	****'
MSaapp'	MSaappa'	MSaappp'	-0.4572±0.0299'	-0.5631±0.0427'	0.1059'	****'
ABalppppp'	ABalpppppa'	ABalpppppp'	-0.2978±0.0511'	-0.4027±0.0496'	0.1049'	****'
ABpraaaa'	ABpraaaaa'	ABpraaaap'	-0.1596±0.1373'	-0.2612±0.0577'	0.1016'	***'
ABplapaaa'	ABplapaaaa'	ABplapaaap'	-0.1185±0.0408'	-0.2139±0.0712'	0.0954'	***'
ABalappap'	ABalappapa'	ABalappapp'	-0.2232±0.0583'	-0.3175±0.1526'	0.0943'	**'
ABpraaapp'	ABpraaappa'	ABpraaappp'	-0.3503±0.0435'	-0.4446±0.0683'	0.0942'	****'
ABalapaaa'	ABalapaaaa'	ABalapaaap'	-0.2741±0.0289'	-0.3682±0.1920'	0.0941'	***'
ABpraaaaa'	ABpraaaaaa'	ABpraaaaap'	0.1360±0.0366'	0.2287±0.1405'	-0.0927'	**'
ABalapaap'	ABalapaapa'	ABalapaapp'	-0.2309±0.0427'	-0.3204±0.1147'	0.0895'	***'
ABprppppa'	ABprppppaa'	ABprppppap'	-0.1227±0.0857'	-0.2097±0.0653'	0.0869'	***'
ABaraaaaa'	ABaraaaaaa'	ABaraaaaap'	-0.0064±0.0492'	-0.0912±0.0892'	0.0848'	***'
MSpppa'	MSpppaa'	MSpppap'	0.1139±0.0393'	0.0293±0.1363'	0.0845'	**'
ABalapap'	ABalapapa'	ABalapapp'	-0.1883±0.0456'	-0.2727±0.0560'	0.0844'	***'
MSaaap'	MSaaapa'	MSaaapp'	0.5750±0.0335'	0.6589±0.0399'	-0.0839'	****'
ABalaaapa'	ABalaaapal'	ABalaaapar'	0.1855±0.0725'	0.2689±0.0940'	-0.0834'	**'
Cppaa'	Cppaaa'	Cppaap'	0.0126±0.0400'	0.0955±0.0653'	-0.0828'	***'
ABplapppa'	ABplapppaa'	ABplapppap'	-0.1998±0.0293'	-0.2798±0.0712'	0.0800'	***'
ABalpappp'	ABalpapppa'	ABalpapppp'	-0.5245±0.0484'	-0.6042±0.0975'	0.0796'	**'
ABarapapa'	ABarapapaa'	ABarapapap'	-0.0436±0.0477'	-0.1209±0.0958'	0.0772'	**'
ABalpapap'	ABalpapapa'	ABalpapapp'	0.1840±0.1013'	0.2575±0.1096'	-0.0735'	n.s.'
ABalppppa'	ABalppppaa'	ABalppppap'	-0.0743±0.0183'	-0.0014±0.0707'	-0.0729'	***'
MSpapp'	MSpappa'	MSpappp'	-0.3811±0.0601'	-0.4535±0.0871'	0.0723'	**'
ABprpapaa'	ABprpapaaa'	ABprpapaap'	-0.0184±0.0321'	-0.0894±0.1133'	0.0710'	*'
ABprapa'	ABprapaa'	ABprapap'	-0.1937±0.0195'	-0.2645±0.0308'	0.0708'	****'
ABaraaapa'	ABaraaapaa'	ABaraaapap'	-0.3330±0.0467'	-0.4031±0.0597'	0.0701'	***'
ABpraap'	ABpraapa'	ABpraapp'	-0.2394±0.0302'	-0.3093±0.0337'	0.0699'	****'
Caap'	Caapa'	Caapp'	-0.4212±0.0410'	-0.4904±0.0931'	0.0693'	**'
ABar'	ABara'	ABarp'	-0.1200±0.0439'	-0.0510±0.0517'	-0.0689'	***'
ABalapapp'	ABalapappa'	ABalapappp'	0.1365±0.0539'	0.0681±0.1952'	0.0685'	n.s.'
MSpaaaa'	MSpaaaaa'	MSpaaaap'	-0.4369±0.0320'	-0.5042±0.0453'	0.0673'	****'
ABalpppp'	ABalppppa'	ABalppppp'	-0.1668±0.0456'	-0.2337±0.0359'	0.0669'	***'
MSpaapa'	MSpaapaa'	MSpaapap'	-0.4084±0.0425'	-0.4747±0.1225'	0.0663'	***'
ABalpapaa'	ABalpapaaa'	ABalpapaap'	0.2027±0.0908'	0.2684±0.0867'	-0.0656'	**'
ABplaaaaa'	ABplaaaaaa'	ABplaaaaap'	-0.3492±0.0509'	-0.4138±0.1590'	0.0646'	***'
Capaa'	Capaaa'	Capaap'	0.0049±0.0444'	0.0672±0.0732'	-0.0623'	**'
ABarpppa'	ABarpppaa'	ABarpppap'	-0.1444±0.0390'	-0.2067±0.0695'	0.0623'	***'
ABpraapaa'	ABpraapaaa'	ABpraapaap'	-0.2443±0.0546'	-0.3063±0.0586'	0.0620'	**'
Daa'	Daaa'	Daap'	-0.0232±0.0677'	-0.0851±0.0751'	0.0619'	*'
ABplppppa'	ABplppppaa'	ABplppppap'	-0.1596±0.0222'	-0.2211±0.0906'	0.0615'	***'
ABpraaap'	ABpraaapa'	ABpraaapp'	-0.2524±0.0421'	-0.3131±0.0339'	0.0608'	***'
MSapaa'	MSapaaa'	MSapaap'	0.0845±0.0325'	0.0240±0.0460'	0.0605'	***'
ABarpa'	ABarpaa'	ABarpap'	0.0107±0.0569'	0.0706±0.0364'	-0.0599'	***'
Cppa'	Cppaa'	Cppap'	-0.0274±0.0116'	0.0324±0.0654'	-0.0598'	***'
ABplaapp'	ABplaappa'	ABplaappp'	-0.3222±0.0256'	-0.3819±0.0456'	0.0597'	****'
ABprapppa'	ABprapppaa'	ABprapppap'	-0.1813±0.0344'	-0.2407±0.0635'	0.0594'	***'
ABplppaap'	ABplppaapa'	ABplppaapp'	-0.0243±0.0491'	-0.0835±0.0601'	0.0592'	***'
MSappa'	MSappaa'	MSappap'	0.1231±0.0177'	0.0640±0.0844'	0.0591'	**'
ABprppapa'	ABprppapaa'	ABprppapap'	0.1472±0.0506'	0.2054±0.0704'	-0.0581'	**'
ABalaaapp'	ABalaaappl'	ABalaaappr'	-0.1920±0.0828'	-0.1339±0.0786'	-0.0580'	**'
ABprapaaa'	ABprapaaaa'	ABprapaaap'	-0.1579±0.0314'	-0.2157±0.0601'	0.0578'	**'
MSp'	MSpa'	MSpp'	0.1771±0.0359'	0.2347±0.0352'	-0.0577'	***'
MSpaaap'	MSpaaapa'	MSpaaapp'	-0.3522±0.0504'	-0.4088±0.1233'	0.0566'	***'
Capap'	Capapa'	Capapp'	-0.0850±0.0513'	-0.0285±0.0871'	-0.0564'	n.s.'
ABplaaaa'	ABplaaaaa'	ABplaaaap'	-0.0982±0.0418'	-0.1546±0.0518'	0.0564'	***'
ABarpaaaa'	ABarpaaaaa'	ABarpaaaap'	0.0384±0.0543'	-0.0177±0.0864'	0.0562'	**'
Epl'	Epla'	Eplp'	0.0507±0.0189'	-0.0051±0.0301'	0.0558'	****'
ABalap'	ABalapa'	ABalapp'	-0.0853±0.0509'	-0.0297±0.0399'	-0.0556'	***'
ABplpapa'	ABplpapaa'	ABplpapap'	-0.0655±0.0515'	-0.1201±0.0400'	0.0546'	***'
ABprpap'	ABprpapa'	ABprpapp'	-0.1001±0.0151'	-0.1544±0.0380'	0.0543'	****'
ABplpaaa'	ABplpaaaa'	ABplpaaap'	0.0512±0.0274'	0.1051±0.0566'	-0.0539'	**'
ABalaappp'	ABalaapppa'	ABalaapppp'	-0.1867±0.0292'	-0.2402±0.1678'	0.0536'	***'
ABplppaa'	ABplppaaa'	ABplppaap'	-0.0587±0.0407'	-0.1118±0.0560'	0.0531'	**'
Epr'	Epra'	Eprp'	0.0265±0.0374'	-0.0260±0.0219'	0.0526'	***'
ABalpaa'	ABalpaaa'	ABalpaap'	-0.3155±0.0343'	-0.3677±0.0348'	0.0522'	***'
MSapa'	MSapaa'	MSapap'	-0.0754±0.0236'	-0.1275±0.0313'	0.0522'	****'
ABalppapa'	ABalppapaa'	ABalppapap'	-0.1076±0.0550'	-0.1598±0.0811'	0.0521'	**'
MSapp'	MSappa'	MSappp'	-0.0897±0.0355'	-0.1410±0.0357'	0.0513'	***'
Da'	Daa'	Dap'	-0.1314±0.0452'	-0.1826±0.0246'	0.0513'	***'
Cappa'	Cappaa'	Cappap'	-0.0090±0.0363'	0.0420±0.0693'	-0.0510'	**'
Cappp'	Capppa'	Capppp'	-0.0236±0.0531'	0.0273±0.0642'	-0.0509'	**'
MSaaapa'	MSaaapaa'	MSaaapap'	0.0972±0.0542'	0.1475±0.0746'	-0.0503'	*'
ABaraaap'	ABaraaapa'	ABaraaapp'	0.2339±0.0476'	0.2833±0.0385'	-0.0494'	**'
ABala'	ABalaa'	ABalap'	-0.1018±0.0398'	-0.0528±0.0486'	-0.0490'	**'
MSpapaa'	MSpapaaa'	MSpapaap'	-0.0767±0.0247'	-0.1257±0.0397'	0.0489'	***'
ABalapppp'	ABalappppa'	ABalappppp'	0.1412±0.0429'	0.0924±0.1220'	0.0488'	n.s.'
ABprapaa'	ABprapaaa'	ABprapaap'	0.0470±0.0437'	0.0956±0.0532'	-0.0486'	**'
Cpap'	Cpapa'	Cpapp'	0.2281±0.0463'	0.2765±0.0479'	-0.0484'	**'
ABaraappa'	ABaraappaa'	ABaraappap'	-0.2193±0.0238'	-0.2677±0.0692'	0.0484'	**'
ABalpap'	ABalpapa'	ABalpapp'	-0.1579±0.0277'	-0.2056±0.0386'	0.0477'	***'
ABalaapaa'	ABalaapaaa'	ABalaapaap'	-0.0730±0.1040'	-0.1204±0.1534'	0.0475'	n.s.'
ABplpapaa'	ABplpapaaa'	ABplpapaap'	-0.0358±0.0210'	-0.0832±0.1419'	0.0473'	n.s.'
ABprpaaaa'	ABprpaaaaa'	ABprpaaaap'	-0.0139±0.0450'	-0.0611±0.0895'	0.0472'	n.s.'
ABalaaaal'	ABalaaaala'	ABalaaaalp'	-0.0477±0.0431'	-0.0010±0.1425'	-0.0467'	n.s.'
ABprppaa'	ABprppaaa'	ABprppaap'	-0.0938±0.0557'	-0.1396±0.0807'	0.0458'	*'
ABplpaap'	ABplpaapa'	ABplpaapp'	-0.0717±0.0288'	-0.1172±0.0438'	0.0455'	***'
Cpppa'	Cpppaa'	Cpppap'	0.0250±0.0435'	-0.0202±0.0630'	0.0453'	**'
ABarapaaa'	ABarapaaaa'	ABarapaaap'	0.0829±0.0247'	0.1280±0.0727'	-0.0451'	*'
ABplpapap'	ABplpapapa'	ABplpapapp'	0.0343±0.0479'	-0.0106±0.0727'	0.0449'	*'
ABplapaa'	ABplapaaa'	ABplapaap'	0.0286±0.0635'	0.0735±0.0277'	-0.0449'	**'
MSap'	MSapa'	MSapp'	0.0968±0.0347'	0.0527±0.0312'	0.0442'	***'
ABalpaapa'	ABalpaapaa'	ABalpaapap'	-0.3986±0.0351'	-0.4427±0.0595'	0.0441'	**'
ABplaapap'	ABplaapapa'	ABplaapapp'	-0.2481±0.0350'	-0.2922±0.0696'	0.0441'	*'
ABalppapp'	ABalppappa'	ABalppappp'	-0.0396±0.0670'	-0.0830±0.1035'	0.0434'	n.s.'
Dp'	Dpa'	Dpp'	-0.1497±0.0375'	-0.1924±0.0216'	0.0427'	***'
ABplaaap'	ABplaaapa'	ABplaaapp'	-0.2863±0.0530'	-0.3290±0.0304'	0.0427'	**'
Ca'	Caa'	Cap'	0.1499±0.0466'	0.1073±0.0442'	0.0426'	**'
ABplpap'	ABplpapa'	ABplpapp'	-0.1516±0.0434'	-0.1937±0.0191'	0.0421'	**'
ABaraapap'	ABaraapapa'	ABaraapapp'	0.3468±0.0414'	0.3887±0.1038'	-0.0419'	n.s.'
ABalpppaa'	ABalpppaaa'	ABalpppaap'	0.0596±0.0703'	0.0180±0.1013'	0.0416'	n.s.'
ABplpa'	ABplpaa'	ABplpap'	-0.0798±0.0372'	-0.0393±0.0622'	-0.0405'	*'
MSpaaa'	MSpaaaa'	MSpaaap'	-0.0129±0.0333'	0.0275±0.0384'	-0.0404'	**'
ABplpaapp'	ABplpaappa'	ABplpaappp'	0.0134±0.0398'	0.0537±0.0660'	-0.0404'	*'
ABplpaaaa'	ABplpaaaaa'	ABplpaaaap'	-0.0243±0.0504'	-0.0646±0.0687'	0.0403'	*'
MSa'	MSaa'	MSap'	0.1368±0.0215'	0.1768±0.0312'	-0.0400'	***'
ABalppp'	ABalpppa'	ABalpppp'	-0.1170±0.0261'	-0.1570±0.0250'	0.0400'	***'
MSppp'	MSpppa'	MSpppp'	-0.0631±0.0154'	-0.1027±0.0323'	0.0396'	***'
MSappp'	MSapppa'	MSapppp'	0.0319±0.0308'	0.0712±0.0613'	-0.0394'	*'
Caa'	Caaa'	Caap'	0.5505±0.0568'	0.5118±0.0348'	0.0387'	**'
ABalpaap'	ABalpaapa'	ABalpaapp'	0.2584±0.0396'	0.2966±0.0446'	-0.0383'	**'
ABalpppa'	ABalpppaa'	ABalpppap'	-0.1802±0.0353'	-0.2179±0.0402'	0.0377'	**'
Cpa'	Cpaa'	Cpap'	0.1569±0.0542'	0.1945±0.0329'	-0.0376'	*'
ABarpapp'	ABarpappa'	ABarpappp'	-0.2846±0.0280'	-0.3215±0.0569'	0.0369'	**'
ABprpppp'	ABprppppa'	ABprppppp'	0.1198±0.0422'	0.0829±0.0705'	0.0369'	n.s.'
ABprppapp'	ABprppappa'	ABprppappp'	0.0433±0.0278'	0.0800±0.0950'	-0.0367'	n.s.'
Cppap'	Cppapa'	Cppapp'	-0.0660±0.0470'	-0.0296±0.1013'	-0.0364'	n.s.'
ABplpppp'	ABplppppa'	ABplppppp'	0.1374±0.0310'	0.1012±0.0551'	0.0362'	**'
ABalpapp'	ABalpappa'	ABalpappp'	-0.1340±0.0432'	-0.1696±0.0497'	0.0356'	**'
ABplpappp'	ABplpapppa'	ABplpapppp'	0.0423±0.0679'	0.0068±0.0778'	0.0355'	n.s.'
ABalppa'	ABalppaa'	ABalppap'	-0.2553±0.0341'	-0.2906±0.0353'	0.0353'	***'
ABpraapp'	ABpraappa'	ABpraappp'	-0.3302±0.0266'	-0.3653±0.0352'	0.0352'	**'
ABarppap'	ABarppapa'	ABarppapp'	0.0172±0.0272'	0.0511±0.0351'	-0.0339'	**'
ABprap'	ABprapa'	ABprapp'	-0.0498±0.0263'	-0.0160±0.0270'	-0.0338'	***'
ABalaaap'	ABalaaapa'	ABalaaapp'	-0.0082±0.0527'	0.0253±0.0833'	-0.0335'	n.s.'
ABaraappp'	ABaraapppa'	ABaraapppp'	0.4069±0.0411'	0.4396±0.1148'	-0.0327'	n.s.'
ABprappp'	ABprapppa'	ABprapppp'	-0.0196±0.0323'	0.0130±0.0470'	-0.0325'	*'
ABarapap'	ABarapapa'	ABarapapp'	-0.1994±0.0349'	-0.2319±0.0398'	0.0325'	**'
Ear'	Eara'	Earp'	0.0775±0.0276'	0.0456±0.0335'	0.0319'	**'
ABarpapaa'	ABarpapaaa'	ABarpapaap'	-0.3714±0.0639'	-0.4032±0.0654'	0.0318'	n.s.'
Eal'	Eala'	Ealp'	0.1041±0.0390'	0.0723±0.0353'	0.0318'	**'
ABplppppp'	ABplpppppa'	ABplpppppp'	0.0479±0.0479'	0.0169±0.1206'	0.0309'	n.s.'
ABalaaaar'	ABalaaaarl'	ABalaaaarr'	-0.0329±0.0512'	-0.0020±0.0967'	-0.0308'	n.s.'
ABaraaaa'	ABaraaaaa'	ABaraaaap'	0.1379±0.0354'	0.1686±0.0444'	-0.0308'	*'
ABaraaa'	ABaraaaa'	ABaraaap'	-0.2781±0.0390'	-0.3088±0.0431'	0.0307'	*'
ABalp'	ABalpa'	ABalpp'	0.0110±0.0124'	0.0406±0.0286'	-0.0297'	***'
Cpaa'	Cpaaa'	Cpaap'	0.0173±0.0817'	-0.0122±0.0482'	0.0295'	n.s.'
ABalpaaa'	ABalpaaaa'	ABalpaaap'	-0.0198±0.0492'	0.0095±0.0510'	-0.0293'	n.s.'
ABplapa'	ABplapaa'	ABplapap'	-0.1627±0.0333'	-0.1916±0.0338'	0.0289'	**'
ABarappap'	ABarappapa'	ABarappapp'	0.1298±0.1105'	0.1010±0.1007'	0.0288'	n.s.'
MSaaaa'	MSaaaaa'	MSaaaap'	0.0451±0.0352'	0.0739±0.0473'	-0.0287'	*'
MSpp'	MSppa'	MSppp'	0.0322±0.0269'	0.0604±0.0312'	-0.0282'	**'
MSpa'	MSpaa'	MSpap'	0.0016±0.0111'	-0.0264±0.0247'	0.0281'	***'
ABplpapp'	ABplpappa'	ABplpappp'	0.2003±0.1051'	0.2281±0.0879'	-0.0277'	n.s.'
C'	Ca'	Cp'	-0.0463±0.0287'	-0.0735±0.0187'	0.0273'	***'
ABalppaa'	ABalppaaa'	ABalppaap'	0.0077±0.0423'	-0.0195±0.0624'	0.0272'	n.s.'
ABalpaaaa'	ABalpaaaaa'	ABalpaaaap'	0.0675±0.0473'	0.0403±0.1447'	0.0271'	n.s.'
ABalpapa'	ABalpapaa'	ABalpapap'	-0.1868±0.0661'	-0.2137±0.0626'	0.0269'	n.s.'
ABarpap'	ABarpapa'	ABarpapp'	-0.0298±0.0324'	-0.0564±0.0291'	0.0265'	**'
ABpraaapa'	ABpraaapaa'	ABpraaapap'	-0.0476±0.0384'	-0.0219±0.0640'	-0.0257'	n.s.'
ABalpa'	ABalpaa'	ABalpap'	-0.1008±0.0276'	-0.0752±0.0417'	-0.0256'	*'
ABplppp'	ABplpppa'	ABplpppp'	-0.0731±0.0415'	-0.0979±0.0264'	0.0248'	**'
MSaaaap'	MSaaaapa'	MSaaaapp'	0.1134±0.0336'	0.0889±0.0981'	0.0245'	n.s.'
ABaraap'	ABaraapa'	ABaraapp'	-0.0119±0.0306'	0.0123±0.0330'	-0.0242'	*'
ABprpapp'	ABprpappa'	ABprpappp'	0.0241±0.0291'	0.0482±0.0310'	-0.0241'	**'
ABprpaap'	ABprpaapa'	ABprpaapp'	-0.0706±0.0207'	-0.0941±0.0744'	0.0235'	n.s.'
P2'	C'	P3'	0.3671±0.0226'	0.3437±0.0272'	0.0234'	**'
ABalaaa'	ABalaaaa'	ABalaaap'	-0.1362±0.0316'	-0.1589±0.0586'	0.0228'	n.s.'
Cpppp'	Cppppa'	Cppppp'	0.0107±0.0489'	0.0331±0.0653'	-0.0223'	n.s.'
Dap'	Dapa'	Dapp'	-0.2450±0.0774'	-0.2674±0.0512'	0.0223'	n.s.'
ABarapp'	ABarappa'	ABarappp'	-0.0456±0.0312'	-0.0677±0.0461'	0.0221'	*'
ABplppap'	ABplppapa'	ABplppapp'	0.0464±0.0330'	0.0684±0.0336'	-0.0221'	*'
ABarappaa'	ABarappaaa'	ABarappaap'	0.0485±0.0867'	0.0267±0.1267'	0.0218'	n.s.'
ABalpppap'	ABalpppapa'	ABalpppapp'	-0.0462±0.0502'	-0.0676±0.1084'	0.0214'	n.s.'
ABprpaaap'	ABprpaaapa'	ABprpaaapp'	-0.1523±0.0650'	-0.1732±0.0698'	0.0209'	n.s.'
ABpl'	ABpla'	ABplp'	0.1345±0.0278'	0.1553±0.0237'	-0.0208'	**'
ABplaap'	ABplaapa'	ABplaapp'	-0.2435±0.0419'	-0.2641±0.0367'	0.0206'	*'
MSppaa'	MSppaaa'	MSppaap'	0.2183±0.0398'	0.1978±0.0708'	0.0205'	n.s.'
ABplapap'	ABplapapa'	ABplapapp'	0.0567±0.0271'	0.0772±0.0302'	-0.0205'	*'
ABarppa'	ABarppaa'	ABarppap'	-0.0858±0.0227'	-0.1063±0.0246'	0.0205'	**'
ABalaap'	ABalaapa'	ABalaapp'	-0.1289±0.0233'	-0.1089±0.0624'	-0.0200'	*'
ABprpp'	ABprppa'	ABprppp'	-0.1331±0.0330'	-0.1531±0.0389'	0.0200'	n.s.'
Capa'	Capaa'	Capap'	0.0013±0.0316'	0.0211±0.0434'	-0.0198'	n.s.'
ABprppppp'	ABprpppppa'	ABprpppppp'	0.1039±0.0402'	0.1234±0.1252'	-0.0195'	n.s.'
ABalpp'	ABalppa'	ABalppp'	-0.1607±0.0225'	-0.1415±0.0537'	-0.0193'	n.s.'
P3'	D'	P4'	0.4153±0.0282'	0.3964±0.0388'	0.0190'	n.s.'
MSapap'	MSapapa'	MSapapp'	0.0643±0.0498'	0.0832±0.0364'	-0.0189'	n.s.'
ABaraapaa'	ABaraapaaa'	ABaraapaap'	-0.1365±0.0365'	-0.1553±0.0820'	0.0189'	n.s.'
MSpapa'	MSpapaa'	MSpapap'	0.2556±0.0295'	0.2744±0.0185'	-0.0188'	**'
ABplpp'	ABplppa'	ABplppp'	-0.0910±0.0186'	-0.1098±0.0617'	0.0188'	n.s.'
ABarappp'	ABarapppa'	ABarapppp'	-0.0789±0.0295'	-0.0975±0.0351'	0.0186'	*'
ABprppa'	ABprppaa'	ABprppap'	-0.1664±0.0233'	-0.1849±0.0364'	0.0186'	*'
ABprpapa'	ABprpapaa'	ABprpapap'	-0.0817±0.0278'	-0.1003±0.0441'	0.0185'	n.s.'
ABplpaapa'	ABplpaapaa'	ABplpaapap'	-0.0050±0.0341'	-0.0234±0.0422'	0.0184'	n.s.'
ABalapp'	ABalappa'	ABalappp'	-0.1770±0.0289'	-0.1951±0.0726'	0.0181'	**'
ABpraa'	ABpraaa'	ABpraap'	-0.1748±0.0588'	-0.1568±0.0537'	-0.0180'	n.s.'
ABprpaapa'	ABprpaapaa'	ABprpaapap'	0.0130±0.0492'	0.0310±0.0688'	-0.0180'	n.s.'
ABprpaaa'	ABprpaaaa'	ABprpaaap'	0.1034±0.0439'	0.0858±0.0649'	0.0176'	n.s.'
ABarppaa'	ABarppaaa'	ABarppaap'	-0.1819±0.0420'	-0.1643±0.0524'	-0.0176'	n.s.'
ABprapp'	ABprappa'	ABprappp'	0.2391±0.0383'	0.2215±0.0213'	0.0176'	n.s.'
ABplp'	ABplpa'	ABplpp'	0.0632±0.0129'	0.0807±0.0232'	-0.0175'	**'
ABalapppa'	ABalapppaa'	ABalapppap'	-0.1051±0.0614'	-0.1224±0.0810'	0.0173'	n.s.'
ABarpppp'	ABarppppa'	ABarppppp'	0.0198±0.0104'	0.0371±0.0444'	-0.0173'	*'
ABalaa'	ABalaaa'	ABalaap'	-0.0232±0.0336'	-0.0059±0.0423'	-0.0172'	n.s.'
ABprpppa'	ABprpppaa'	ABprpppap'	0.0579±0.0534'	0.0411±0.0508'	0.0168'	n.s.'
ABara'	ABaraa'	ABarap'	0.0076±0.0170'	0.0243±0.0131'	-0.0167'	***'
ABarapppa'	ABarapppaa'	ABarapppap'	-0.1047±0.0826'	-0.1210±0.0997'	0.0163'	n.s.'
ABpraapa'	ABpraapaa'	ABpraapap'	-0.0200±0.0568'	-0.0362±0.0447'	0.0162'	n.s.'
ABarap'	ABarapa'	ABarapp'	0.0411±0.0342'	0.0250±0.0310'	0.0161'	n.s.'
ABplaapaa'	ABplaapaaa'	ABplaapaap'	-0.2338±0.0735'	-0.2494±0.0467'	0.0156'	n.s.'
MSaapa'	MSaapaa'	MSaapap'	0.2914±0.0199'	0.3069±0.0353'	-0.0155'	n.s.'
ABarapa'	ABarapaa'	ABarapap'	-0.1640±0.0257'	-0.1791±0.0251'	0.0151'	*'
ABprpaapp'	ABprpaappa'	ABprpaappp'	0.0574±0.0636'	0.0723±0.0612'	-0.0149'	n.s.'
ABplapp'	ABplappa'	ABplappp'	0.2261±0.0461'	0.2409±0.0270'	-0.0148'	n.s.'
ABal'	ABala'	ABalp'	-0.0682±0.0368'	-0.0829±0.0180'	0.0147'	n.s.'
Capp'	Cappa'	Cappp'	0.0187±0.0397'	0.0333±0.0377'	-0.0146'	n.s.'
ABalappa'	ABalappaa'	ABalappap'	-0.2528±0.0666'	-0.2672±0.0427'	0.0144'	n.s.'
ABplaaa'	ABplaaaa'	ABplaaap'	-0.1241±0.0207'	-0.1384±0.0500'	0.0144'	n.s.'
MSpppp'	MSppppa'	MSppppp'	0.0598±0.0337'	0.0740±0.0369'	-0.0142'	n.s.'
ABprppaap'	ABprppaapa'	ABprppaapp'	-0.0388±0.0541'	-0.0526±0.0894'	0.0138'	n.s.'
ABplppa'	ABplppaa'	ABplppap'	-0.1295±0.0288'	-0.1432±0.0273'	0.0137'	n.s.'
ABplpppaa'	ABplpppaaa'	ABplpppaap'	0.0105±0.0562'	0.0242±0.0903'	-0.0137'	n.s.'
ABprapap'	ABprapapa'	ABprapapp'	0.0985±0.0249'	0.0850±0.0424'	0.0135'	n.s.'
ABprpa'	ABprpaa'	ABprpap'	-0.0895±0.0372'	-0.0762±0.0296'	-0.0134'	n.s.'
ABplpaa'	ABplpaaa'	ABplpaap'	-0.0125±0.0280'	-0.0256±0.0299'	0.0132'	n.s.'
ABarapaa'	ABarapaaa'	ABarapaap'	-0.2037±0.0334'	-0.2168±0.0438'	0.0131'	n.s.'
ABplap'	ABplapa'	ABplapp'	-0.0242±0.0315'	-0.0111±0.0229'	-0.0131'	n.s.'
MSaap'	MSaapa'	MSaapp'	0.2790±0.0421'	0.2919±0.0391'	-0.0129'	n.s.'
E'	Ea'	Ep'	0.0509±0.0244'	0.0380±0.0200'	0.0129'	n.s.'
ABaraapp'	ABaraappa'	ABaraappp'	-0.0898±0.0304'	-0.1023±0.0359'	0.0125'	n.s.'
ABp'	ABpl'	ABpr'	0.0381±0.0420'	0.0502±0.0425'	-0.0121'	n.s.'
ABplappp'	ABplapppa'	ABplapppp'	0.0041±0.0552'	-0.0076±0.0912'	0.0117'	n.s.'
ABarpaap'	ABarpaapa'	ABarpaapp'	-0.0583±0.0341'	-0.0470±0.0377'	-0.0113'	n.s.'
ABalpaaap'	ABalpaaapa'	ABalpaaapp'	-0.0163±0.0475'	-0.0275±0.1448'	0.0112'	n.s.'
MSpap'	MSpapa'	MSpapp'	0.2165±0.0244'	0.2275±0.0393'	-0.0110'	n.s.'
Cp'	Cpa'	Cpp'	0.2445±0.0350'	0.2336±0.0405'	0.0109'	n.s.'
ABaraapa'	ABaraapaa'	ABaraapap'	-0.0949±0.0246'	-0.1058±0.0316'	0.0108'	n.s.'
ABprappa'	ABprappaa'	ABprappap'	0.0041±0.0249'	-0.0067±0.0431'	0.0108'	n.s.'
Ea'	Eal'	Ear'	-0.0013±0.0191'	0.0095±0.0187'	-0.0108'	*'
Dpp'	Dppa'	Dppp'	-0.2815±0.0588'	-0.2918±0.0450'	0.0103'	n.s.'
ABplpppa'	ABplpppaa'	ABplpppap'	0.0292±0.0376'	0.0390±0.0461'	-0.0098'	n.s.'
MS'	MSa'	MSp'	-0.0181±0.0193'	-0.0084±0.0185'	-0.0097'	*'
Cpp'	Cppa'	Cppp'	-0.0056±0.0352'	-0.0151±0.0364'	0.0095'	n.s.'
ABprpappa'	ABprpappaa'	ABprpappap'	-0.0397±0.0688'	-0.0303±0.0770'	-0.0094'	n.s.'
ABprpapap'	ABprpapapa'	ABprpapapp'	0.0557±0.0227'	0.0465±0.0745'	0.0092'	n.s.'
ABalaaaa'	ABalaaaal'	ABalaaaar'	0.0093±0.0538'	0.0178±0.0801'	-0.0085'	n.s.'
ABarpaa'	ABarpaaa'	ABarpaap'	-0.4375±0.0432'	-0.4292±0.0575'	-0.0082'	n.s.'
Caaa'	Caaaa'	Caaap'	-0.0022±0.0375'	-0.0102±0.0466'	0.0080'	n.s.'
MSaaa'	MSaaaa'	MSaaap'	0.0720±0.0294'	0.0800±0.0351'	-0.0080'	n.s.'
ABprpppaa'	ABprpppaaa'	ABprpppaap'	0.0654±0.0644'	0.0576±0.1068'	0.0078'	n.s.'
ABprpappp'	ABprpapppa'	ABprpapppp'	0.0192±0.0481'	0.0115±0.1056'	0.0077'	n.s.'
MSppap'	MSppapa'	MSppapp'	0.0522±0.0091'	0.0594±0.0331'	-0.0071'	n.s.'
ABarpapa'	ABarpapaa'	ABarpapap'	-0.0708±0.0394'	-0.0641±0.0550'	-0.0067'	n.s.'
ABarppp'	ABarpppa'	ABarpppp'	-0.0710±0.0208'	-0.0776±0.0402'	0.0066'	n.s.'
ABalapa'	ABalapaa'	ABalapap'	-0.0636±0.0252'	-0.0701±0.0400'	0.0065'	n.s.'
MSaapaa'	MSaapaaa'	MSaapaap'	-0.0836±0.0419'	-0.0770±0.0660'	-0.0065'	n.s.'
Dpa'	Dpaa'	Dpap'	-0.1077±0.1326'	-0.1142±0.0705'	0.0064'	n.s.'
ABalapaa'	ABalapaaa'	ABalapaap'	-0.0967±0.0445'	-0.1028±0.0732'	0.0061'	n.s.'
ABplappa'	ABplappaa'	ABplappap'	0.0145±0.0253'	0.0206±0.0448'	-0.0061'	n.s.'
MSpaa'	MSpaaa'	MSpaap'	0.3152±0.0415'	0.3213±0.0378'	-0.0061'	n.s.'
ABalppap'	ABalppapa'	ABalppapp'	-0.1227±0.0437'	-0.1287±0.0526'	0.0060'	n.s.'
ABarpaaa'	ABarpaaaa'	ABarpaaap'	0.0780±0.0792'	0.0721±0.0756'	0.0059'	n.s.'
ABpraaa'	ABpraaaa'	ABpraaap'	-0.1761±0.0418'	-0.1818±0.0691'	0.0058'	n.s.'
ABplpaaap'	ABplpaaapa'	ABplpaaapp'	-0.1856±0.0627'	-0.1911±0.0800'	0.0055'	n.s.'
EMS'	MS'	E'	0.0688±0.0445'	0.0634±0.0359'	0.0054'	n.s.'
ABprpaa'	ABprpaaa'	ABprpaap'	-0.0303±0.0398'	-0.0252±0.0290'	-0.0052'	n.s.'
ABpla'	ABplaa'	ABplap'	0.0332±0.0239'	0.0379±0.0170'	-0.0047'	n.s.'
ABarappa'	ABarappaa'	ABarappap'	-0.1721±0.0263'	-0.1767±0.0411'	0.0047'	n.s.'
MSppa'	MSppaa'	MSppap'	-0.1319±0.0151'	-0.1275±0.0306'	-0.0045'	n.s.'
ABarp'	ABarpa'	ABarpp'	-0.0476±0.0286'	-0.0520±0.0180'	0.0045'	n.s.'
ABprppap'	ABprppapa'	ABprppapp'	0.0594±0.0320'	0.0635±0.0367'	-0.0041'	n.s.'
D'	Da'	Dp'	-0.0254±0.0278'	-0.0215±0.0427'	-0.0039'	n.s.'
Ep'	Epl'	Epr'	0.0048±0.0479'	0.0012±0.0226'	0.0036'	n.s.'
MSaa'	MSaaa'	MSaap'	0.0352±0.0258'	0.0385±0.0232'	-0.0033'	n.s.'
Cppp'	Cpppa'	Cpppp'	0.0473±0.0218'	0.0444±0.0414'	0.0029'	n.s.'
ABa'	ABal'	ABar'	-0.0348±0.0192'	-0.0376±0.0203'	0.0028'	n.s.'
ABarpp'	ABarppa'	ABarppp'	-0.0319±0.0265'	-0.0291±0.0239'	-0.0028'	n.s.'
ABprppp'	ABprpppa'	ABprpppp'	-0.1138±0.0276'	-0.1111±0.0660'	-0.0027'	n.s.'
ABpra'	ABpraa'	ABprap'	0.0386±0.0313'	0.0410±0.0318'	-0.0023'	n.s.'
ABpr'	ABpra'	ABprp'	0.0709±0.0231'	0.0689±0.0242'	0.0021'	n.s.'
ABprp'	ABprpa'	ABprpp'	0.0502±0.0235'	0.0485±0.0248'	0.0017'	n.s.'
ABplaapa'	ABplaapaa'	ABplaapap'	-0.0557±0.0243'	-0.0542±0.0470'	-0.0015'	n.s.'
ABaraa'	ABaraaa'	ABaraap'	-0.0875±0.0308'	-0.0887±0.0258'	0.0012'	n.s.'
ABarapppp'	ABarappppa'	ABarappppp'	-0.0552±0.0561'	-0.0540±0.0902'	-0.0012'	n.s.'
ABalaapa'	ABalaapaa'	ABalaapap'	-0.0189±0.0233'	-0.0198±0.0686'	0.0008'	n.s.'
ABalappp'	ABalapppa'	ABalapppp'	-0.0461±0.0563'	-0.0454±0.0806'	-0.0007'	n.s.'
Cap'	Capa'	Capp'	0.0073±0.0317'	0.0075±0.0160'	-0.0002'	n.s.'
ABplaa'	ABplaaa'	ABplaap'	-0.1535±0.0420'	-0.1536±0.0350'	0.0001'	n.s.'
