# Supplementary material for: Cell lineage-resolved embryonic morphological map reveals novel signaling regulating cell fate and size asymmetry
Source: Research Square preprint supplement (doi:10.21203/rs.3.rs-4664717/v1), 2024-08-30
Supplement: Supplementary file 7 [file Table S12.xlsx]

## Sheet: Table S
Sister-cell pair						With an initially averagely smaller volume for apoptotic cell or not?	With an initially averagely smaller surface area for apoptotic cell or not?	Valid embryo sample size	Initial volume ratio of apoptotic cell to non-apoptotic cell in WT_Sample1 ~ WT_Sample8 (“NaN”: no comparable data recorded)	Initial surface area ratio of apoptotic cell to non-apoptotic cell WT_Sample1 ~ WT_Sample8 (“NaN”: no comparable data recorded)	Note
Apoptotic cell	Cell volume (μm3)	Cell surface area (μm2)	Non-apoptotic cell	Cell volume (μm3)	Cell surface area (μm2)
ABalppppppap'	12.91 ± 5.08'	34.94 ± 8.59'	ABalppppppaa'	28.84 ± 2.36'	62.68 ± 6.62'	Yes'	Yes'	5	0.46 ± 0.23 (NaN, 0.41, 0.27, 0.44, 0.85, NaN, NaN, 0.33)'	0.57 ± 0.19 (NaN, 0.56, 0.40, 0.53, 0.90, NaN, NaN, 0.46)'
ABarpapaapa'	7.75 ± 0.00'	26.30 ± 0.00'	ABarpapaapp'	43.75 ± 0.00'	82.95 ± 0.00'	Yes'	Yes'	1	0.18 ± 0.00 (NaN, 0.18, NaN, NaN, NaN, NaN, NaN, NaN)'	0.32 ± 0.00 (NaN, 0.32, NaN, NaN, NaN, NaN, NaN, NaN)'
ABplppppppa'	13.07 ± 3.22'	35.85 ± 5.65'	ABplppppppp'	21.89 ± 3.72'	49.51 ± 5.37'	Yes'	Yes'	5	0.60 ± 0.15 (0.85, 0.51, 0.45, NaN, NaN, NaN, 0.61, 0.59)'	0.73 ± 0.13 (0.96, 0.65, 0.65, NaN, NaN, NaN, 0.70, 0.69)'
ABprppppppa'	12.69 ± 1.90'	35.11 ± 3.36'	ABprppppppp'	21.87 ± 3.41'	49.05 ± 5.11'	Yes'	Yes'	7	0.59 ± 0.09 (0.70, 0.48, 0.51, 0.70, NaN, 0.62, 0.55, 0.54)'	0.72 ± 0.08 (0.83, 0.63, 0.68, 0.83, NaN, 0.70, 0.68, 0.68)'
MSappapa'	9.58 ± 0.75'	29.31 ± 1.42'	MSappapp'	43.32 ± 1.72'	79.16 ± 2.76'	Yes'	Yes'	3	0.22 ± 0.01 (NaN, NaN, NaN, 0.21, NaN, 0.24, NaN, 0.21)'	0.37 ± 0.01 (NaN, NaN, NaN, 0.36, NaN, 0.37, NaN, 0.37)'
MSpppapa'	13.00 ± 0.00'	36.20 ± 0.00'	MSpppapp'	45.83 ± 0.00'	90.67 ± 0.00'	Yes'	Yes'	1	0.28 ± 0.00 (NaN, NaN, NaN, NaN, 0.28, NaN, NaN, NaN)'	0.40 ± 0.00 (NaN, NaN, NaN, NaN, 0.40, NaN, NaN, NaN)'
Caapap'	12.97 ± 1.58'	36.14 ± 2.52'	Caapaa'	22.12 ± 1.70'	50.08 ± 2.18'	Yes'	Yes'	3	0.59 ± 0.06 (NaN, NaN, NaN, 0.53, NaN, NaN, 0.64, 0.59)'	0.72 ± 0.04 (NaN, NaN, NaN, 0.70, NaN, NaN, 0.76, 0.71)'
ABalaaaalpa'	13.02 ± 1.77'	35.08 ± 3.65'	ABalaaaalpp'	17.20 ± 2.65'	41.62 ± 4.08'	Yes'	Yes'	2	0.77 ± 0.22 (0.93, NaN, NaN, NaN, NaN, NaN, 0.62, NaN)'	0.85 ± 0.17 (0.97, NaN, NaN, NaN, NaN, NaN, 0.73, NaN)'
ABalppppapp'	7.51 ± 0.00'	24.52 ± 0.00'	ABalppppapa'	33.86 ± 0.00'	68.50 ± 0.00'	Yes'	Yes'	1	0.22 ± 0.00 (NaN, 0.22, NaN, NaN, NaN, NaN, NaN, NaN)'	0.36 ± 0.00 (NaN, 0.36, NaN, NaN, NaN, NaN, NaN, NaN)'
ABplapppapa'	6.29 ± 0.00'	22.50 ± 0.00'	ABplapppapp'	33.73 ± 0.00'	67.45 ± 0.00'	Yes'	Yes'	1	0.19 ± 0.00 (NaN, NaN, 0.19, NaN, NaN, NaN, NaN, NaN)'	0.33 ± 0.00 (NaN, NaN, 0.33, NaN, NaN, NaN, NaN, NaN)'
ABplpppapp'	12.52 ± 0.00'	34.92 ± 0.00'	ABplpppapa'	46.82 ± 0.00'	82.83 ± 0.00'	Yes'	Yes'	1	0.27 ± 0.00 (NaN, NaN, NaN, 0.27, NaN, NaN, NaN, NaN)'	0.42 ± 0.00 (NaN, NaN, NaN, 0.42, NaN, NaN, NaN, NaN)'
ABprapppapa'	8.50 ± 0.09'	27.52 ± 0.24'	ABprapppapp'	26.65 ± 2.68'	56.52 ± 2.86'	Yes'	Yes'	2	0.32 ± 0.03 (NaN, 0.30, NaN, 0.34, NaN, NaN, NaN, NaN)'	0.49 ± 0.03 (NaN, 0.47, NaN, 0.51, NaN, NaN, NaN, NaN)'
ABprpppapp'	7.38 ± 0.00'	24.23 ± 0.00'	ABprpppapa'	49.79 ± 0.00'	94.16 ± 0.00'	Yes'	Yes'	1	0.15 ± 0.00 (NaN, NaN, NaN, 0.15, NaN, NaN, NaN, NaN)'	0.26 ± 0.00 (NaN, NaN, NaN, 0.26, NaN, NaN, NaN, NaN)'
MSapaapa'	11.96 ± 1.95'	34.51 ± 5.22'	MSapaapp'	57.36 ± 3.26'	95.21 ± 5.96'	Yes'	Yes'	2	0.21 ± 0.02 (NaN, NaN, NaN, 0.19, 0.22, NaN, NaN, NaN)'	0.36 ± 0.03 (NaN, NaN, NaN, 0.34, 0.38, NaN, NaN, NaN)'
ABalaaaarla'	13.11 ± 0.58'	35.16 ± 0.60'	ABalaaaarlp'	15.55 ± 2.63'	39.51 ± 4.29'	Yes'	Yes'	4	0.86 ± 0.15 (0.95, 1.02, NaN, NaN, 0.78, NaN, 0.70, NaN)'	0.90 ± 0.09 (0.95, 1.00, NaN, NaN, 0.84, NaN, 0.80, NaN)'
ABalppppapap'	11.00 ± 0.00'	32.53 ± 0.00'	ABalppppapaa'	15.88 ± 0.00'	41.90 ± 0.00'	Yes'	Yes'	1	0.69 ± 0.00 (0.69, NaN, NaN, NaN, NaN, NaN, NaN, NaN)'	0.78 ± 0.00 (0.78, NaN, NaN, NaN, NaN, NaN, NaN, NaN)'
ABarappaapp'	8.32 ± 2.50'	26.94 ± 5.02'	ABarappaapa'	23.83 ± 0.69'	52.43 ± 0.56'	Yes'	Yes'	2	0.35 ± 0.12 (NaN, NaN, NaN, NaN, NaN, 0.43, 0.27, NaN)'	0.51 ± 0.10 (NaN, NaN, NaN, NaN, NaN, 0.59, 0.44, NaN)'
ABarpaaapp'	17.65 ± 0.00'	45.10 ± 0.00'	ABarpaaapa'	39.71 ± 0.00'	77.61 ± 0.00'	Yes'	Yes'	1	0.44 ± 0.00 (NaN, NaN, NaN, NaN, NaN, 0.44, NaN, NaN)'	0.58 ± 0.00 (NaN, NaN, NaN, NaN, NaN, 0.58, NaN, NaN)'
ABplapppaap'	11.91 ± 1.33'	33.38 ± 2.15'	ABplapppaaa'	18.50 ± 3.48'	45.41 ± 6.15'	Yes'	Yes'	4	0.66 ± 0.16 (NaN, NaN, 0.65, 0.46, NaN, 0.71, NaN, 0.83)'	0.75 ± 0.12 (NaN, NaN, 0.77, 0.58, NaN, 0.76, NaN, 0.87)'
ABplppaapaa'	14.19 ± 2.65'	37.79 ± 5.08'	ABplppaapap'	18.35 ± 2.28'	45.03 ± 4.10'	Yes'	Yes'	5	0.77 ± 0.07 (NaN, NaN, 0.72, 0.78, NaN, 0.88, 0.75, 0.72)'	0.84 ± 0.05 (NaN, NaN, 0.80, 0.83, NaN, 0.91, 0.84, 0.80)'
ABprapppaap'	9.38 ± 1.19'	28.74 ± 2.28'	ABprapppaaa'	15.98 ± 0.63'	40.23 ± 0.94'	Yes'	Yes'	5	0.59 ± 0.09 (NaN, 0.52, 0.73, NaN, NaN, 0.60, 0.60, 0.50)'	0.72 ± 0.07 (NaN, 0.67, 0.82, NaN, NaN, 0.72, 0.71, 0.65)'
ABprppaapaa'	13.70 ± 2.57'	36.85 ± 4.89'	ABprppaapap'	16.70 ± 1.92'	42.13 ± 2.87'	Yes'	Yes'	6	0.82 ± 0.13 (NaN, 0.61, 0.71, NaN, 0.83, 0.95, 0.91, 0.91)'	0.88 ± 0.10 (NaN, 0.72, 0.79, NaN, 0.91, 0.98, 0.92, 0.93)'
MSppaapa'	18.15 ± 0.00'	46.13 ± 0.00'	MSppaapp'	42.04 ± 0.00'	78.89 ± 0.00'	Yes'	Yes'	1	0.43 ± 0.00 (NaN, NaN, NaN, NaN, 0.43, NaN, NaN, NaN)'	0.58 ± 0.00 (NaN, NaN, NaN, NaN, 0.58, NaN, NaN, NaN)'
ABalppppaav'	9.30 ± 0.00'	29.02 ± 0.00'	ABalppppaad'	32.19 ± 0.00'	73.69 ± 0.00'	Yes'	Yes'	1	0.29 ± 0.00 (NaN, NaN, NaN, NaN, 0.29, NaN, NaN, NaN)'	0.39 ± 0.00 (NaN, NaN, NaN, NaN, 0.39, NaN, NaN, NaN)'
ABplapappppp'	9.69 ± 0.00'	29.14 ± 0.00'	ABplapappppa'	26.81 ± 0.00'	56.20 ± 0.00'	Yes'	Yes'	1	0.36 ± 0.00 (0.36, NaN, NaN, NaN, NaN, NaN, NaN, NaN)'	0.52 ± 0.00 (0.52, NaN, NaN, NaN, NaN, NaN, NaN, NaN)'
ABplppaaap'	9.03 ± 0.00'	28.30 ± 0.00'	ABplppaaaa'	49.99 ± 0.00'	84.97 ± 0.00'	Yes'	Yes'	1	0.18 ± 0.00 (NaN, NaN, NaN, NaN, NaN, NaN, 0.18, NaN)'	0.33 ± 0.00 (NaN, NaN, NaN, NaN, NaN, NaN, 0.33, NaN)'
ABprapappppp'	16.71 ± 0.00'	39.86 ± 0.00'	ABprapappppa'	29.24 ± 0.00'	62.90 ± 0.00'	Yes'	Yes'	1	0.57 ± 0.00 (0.57, NaN, NaN, NaN, NaN, NaN, NaN, NaN)'	0.63 ± 0.00 (0.63, NaN, NaN, NaN, NaN, NaN, NaN, NaN)'
ABprppaaap'	7.29 ± 0.00'	25.06 ± 0.00'	ABprppaaaa'	41.84 ± 0.00'	75.07 ± 0.00'	Yes'	Yes'	1	0.17 ± 0.00 (NaN, NaN, NaN, 0.17, NaN, NaN, NaN, NaN)'	0.33 ± 0.00 (NaN, NaN, NaN, 0.33, NaN, NaN, NaN, NaN)'
MSaapaapap'	11.72 ± 0.00'	34.02 ± 0.00'	MSaapaapaa'	29.83 ± 0.00'	64.04 ± 0.00'	Yes'	Yes'	1	0.39 ± 0.00 (0.39, NaN, NaN, NaN, NaN, NaN, NaN, NaN)'	0.53 ± 0.00 (0.53, NaN, NaN, NaN, NaN, NaN, NaN, NaN)'
MSpapapap'	11.39 ± 1.28'	32.96 ± 2.29'	MSpapapaa'	20.11 ± 3.20'	47.65 ± 4.45'	Yes'	Yes'	7	0.57 ± 0.08 (NaN, 0.57, 0.44, 0.61, 0.64, 0.54, 0.70, 0.52)'	0.70 ± 0.07 (NaN, 0.68, 0.58, 0.73, 0.75, 0.65, 0.79, 0.68)'
ABalaaaparl'	8.55 ± 0.00'	26.84 ± 0.00'	ABalaaaparr'	11.55 ± 0.00'	32.48 ± 0.00'	Yes'	Yes'	1	0.74 ± 0.00 (NaN, NaN, NaN, NaN, NaN, 0.74, NaN, NaN)'	0.83 ± 0.00 (NaN, NaN, NaN, NaN, NaN, 0.83, NaN, NaN)'
ABarapappap'	12.30 ± 2.87'	35.09 ± 5.90'	ABarapappaa'	17.23 ± 1.94'	43.55 ± 3.60'	Yes'	Yes'	4	0.71 ± 0.12 (NaN, NaN, 0.53, 0.72, 0.81, 0.78, NaN, NaN)'	0.80 ± 0.08 (NaN, NaN, 0.69, 0.79, 0.86, 0.87, NaN, NaN)'
ABplapapppa'	6.46 ± 1.53'	22.66 ± 3.06'	ABplapapppp'	39.69 ± 1.55'	71.12 ± 1.81'	Yes'	Yes'	6	0.16 ± 0.04 (0.12, 0.23, 0.17, 0.19, 0.14, NaN, NaN, 0.13)'	0.32 ± 0.04 (0.27, 0.39, 0.32, 0.35, 0.30, NaN, NaN, 0.28)'
ABplppaaaapa'	14.93 ± 0.00'	38.57 ± 0.00'	ABplppaaaapp'	14.93 ± 0.00'	38.58 ± 0.00'	Yes'	Yes'	1	1.00 ± 0.00 (1.00, NaN, NaN, NaN, NaN, NaN, NaN, NaN)'	1.00 ± 0.00 (1.00, NaN, NaN, NaN, NaN, NaN, NaN, NaN)'
ABprapapppa'	8.26 ± 2.97'	26.58 ± 5.05'	ABprapapppp'	30.08 ± 4.31'	58.95 ± 4.62'	Yes'	Yes'	3	0.28 ± 0.13 (NaN, NaN, NaN, 0.43, NaN, 0.21, 0.21, NaN)'	0.45 ± 0.11 (NaN, NaN, NaN, 0.58, NaN, 0.39, 0.39, NaN)'
MSaaappa'	8.00 ± 0.83'	25.71 ± 1.41'	MSaaappp'	25.51 ± 5.49'	54.44 ± 7.75'	Yes'	Yes'	3	0.32 ± 0.08 (NaN, NaN, 0.29, 0.27, NaN, NaN, NaN, 0.41)'	0.48 ± 0.07 (NaN, NaN, 0.45, 0.43, NaN, NaN, NaN, 0.56)'
MSpapaapap'	12.82 ± 0.00'	35.66 ± 0.00'	MSpapaapaa'	23.09 ± 0.00'	55.11 ± 0.00'	Yes'	Yes'	1	0.56 ± 0.00 (0.56, NaN, NaN, NaN, NaN, NaN, NaN, NaN)'	0.65 ± 0.00 (0.65, NaN, NaN, NaN, NaN, NaN, NaN, NaN)'
ABalpppappa'	5.96 ± 0.92'	23.33 ± 2.90'	ABalpppappp'	31.61 ± 4.31'	62.52 ± 5.35'	Yes'	Yes'	2	0.19 ± 0.06 (0.15, NaN, NaN, NaN, NaN, NaN, 0.23, NaN)'	0.38 ± 0.08 (0.32, NaN, NaN, NaN, NaN, NaN, 0.43, NaN)'
ABarapapaapp'	16.47 ± 0.00'	47.76 ± 0.00'	ABarapapaapa'	23.88 ± 0.00'	54.89 ± 0.00'	Yes'	Yes'	1	0.69 ± 0.00 (0.69, NaN, NaN, NaN, NaN, NaN, NaN, NaN)'	0.87 ± 0.00 (0.87, NaN, NaN, NaN, NaN, NaN, NaN, NaN)'
ABplapaaaaa'	9.80 ± 1.04'	29.82 ± 2.38'	ABplapaaaap'	29.17 ± 2.74'	59.79 ± 4.41'	Yes'	Yes'	4	0.34 ± 0.03 (NaN, NaN, 0.31, 0.32, NaN, 0.33, NaN, 0.38)'	0.50 ± 0.05 (NaN, NaN, 0.48, 0.47, NaN, 0.47, NaN, 0.58)'
ABprapaaaaa'	7.44 ± 2.42'	24.95 ± 5.27'	ABprapaaaap'	26.07 ± 1.68'	55.91 ± 2.44'	Yes'	Yes'	4	0.29 ± 0.09 (0.19, NaN, 0.39, 0.32, NaN, NaN, NaN, 0.23)'	0.45 ± 0.10 (0.32, NaN, 0.55, 0.51, NaN, NaN, NaN, 0.42)'
MSaaaappa'	11.14 ± 3.49'	31.76 ± 6.74'	MSaaaappp'	33.51 ± 3.90'	65.96 ± 4.26'	Yes'	Yes'	6	0.34 ± 0.13 (0.15, NaN, 0.41, 0.25, NaN, 0.40, 0.53, 0.31)'	0.49 ± 0.12 (0.30, NaN, 0.55, 0.42, NaN, 0.56, 0.63, 0.47)'
MSpaapp'	16.17 ± 1.68'	41.21 ± 2.95'	MSpaapa'	110.42 ± 1.98'	145.12 ± 5.63'	Yes'	Yes'	2	0.15 ± 0.01 (NaN, 0.16, NaN, 0.14, NaN, NaN, NaN, NaN)'	0.28 ± 0.01 (NaN, 0.29, NaN, 0.28, NaN, NaN, NaN, NaN)'
ABalaapaaal'	13.54 ± 2.32'	36.73 ± 4.95'	ABalaapaaar'	17.34 ± 1.92'	42.59 ± 3.25'	Yes'	Yes'	5	0.79 ± 0.13 (NaN, 0.86, 0.79, 0.82, NaN, 0.56, 0.89, NaN)'	0.86 ± 0.10 (NaN, 0.90, 0.85, 0.94, NaN, 0.69, 0.94, NaN)'
ABarapapaaa'	16.08 ± 9.23'	39.73 ± 13.41'	ABarapapaap'	28.29 ± 14.63'	58.49 ± 21.94'	Yes'	Yes'	3	0.97 ± 1.18 (NaN, NaN, NaN, NaN, NaN, 0.32, 0.27, 2.33)'	0.85 ± 0.70 (NaN, NaN, NaN, NaN, NaN, 0.47, 0.43, 1.66)'
ABplaapapppp'	14.99 ± 0.00'	39.34 ± 0.00'	ABplaapapppa'	18.47 ± 0.00'	46.73 ± 0.00'	Yes'	Yes'	1	0.81 ± 0.00 (0.81, NaN, NaN, NaN, NaN, NaN, NaN, NaN)'	0.84 ± 0.00 (0.84, NaN, NaN, NaN, NaN, NaN, NaN, NaN)'
ABpraapapppp'	19.20 ± 0.00'	45.89 ± 0.00'	ABpraapapppa'	19.72 ± 0.00'	47.99 ± 0.00'	Yes'	Yes'	1	0.97 ± 0.00 (0.97, NaN, NaN, NaN, NaN, NaN, NaN, NaN)'	0.96 ± 0.00 (0.96, NaN, NaN, NaN, NaN, NaN, NaN, NaN)'
ABprpaapapp'	10.49 ± 1.25'	31.80 ± 3.12'	ABprpaapapa'	20.10 ± 1.20'	46.52 ± 2.27'	Yes'	Yes'	3	0.52 ± 0.05 (NaN, 0.53, NaN, NaN, 0.56, NaN, NaN, 0.47)'	0.68 ± 0.04 (NaN, 0.69, NaN, NaN, 0.72, NaN, NaN, 0.64)'
MSpaapaap'	16.83 ± 2.68'	42.59 ± 4.72'	MSpaapaaa'	22.46 ± 2.71'	51.34 ± 5.73'	Yes'	Yes'	6	0.75 ± 0.10 (NaN, 0.76, 0.86, NaN, 0.67, 0.86, 0.73, 0.63)'	0.83 ± 0.08 (NaN, 0.85, 0.84, NaN, 0.75, 0.96, 0.83, 0.77)'
ABarapaapap'	13.72 ± 2.93'	36.74 ± 5.17'	ABarapaapaa'	15.26 ± 2.98'	39.62 ± 5.99'	Yes'	Yes'	4	0.97 ± 0.46 (NaN, 0.68, 0.81, NaN, NaN, NaN, 1.65, 0.72)'	0.96 ± 0.30 (NaN, 0.77, 0.89, NaN, NaN, NaN, 1.41, 0.77)'
ABplaaaaapa'	16.66 ± 5.53'	43.65 ± 9.86'	ABplaaaaapp'	40.88 ± 8.00'	75.09 ± 10.23'	Yes'	Yes'	2	0.43 ± 0.22 (NaN, NaN, NaN, 0.27, NaN, 0.58, NaN, NaN)'	0.60 ± 0.21 (NaN, NaN, NaN, 0.45, NaN, 0.75, NaN, NaN)'
ABplpaapapp'	9.00 ± 1.72'	29.06 ± 3.04'	ABplpaapapa'	20.28 ± 3.23'	46.69 ± 5.38'	Yes'	Yes'	5	0.45 ± 0.11 (0.45, 0.48, 0.29, 0.43, 0.61, NaN, NaN, NaN)'	0.63 ± 0.08 (0.63, 0.65, 0.53, 0.58, 0.75, NaN, NaN, NaN)'
ABpraaapppap'	6.93 ± 0.00'	24.48 ± 0.00'	ABpraaapppaa'	22.84 ± 0.00'	53.32 ± 0.00'	Yes'	Yes'	1	0.30 ± 0.00 (NaN, NaN, NaN, 0.30, NaN, NaN, NaN, NaN)'	0.46 ± 0.00 (NaN, NaN, NaN, 0.46, NaN, NaN, NaN, NaN)'
MSpaaaaap'	11.04 ± 1.86'	32.02 ± 3.36'	MSpaaaaaa'	26.75 ± 3.10'	57.23 ± 4.93'	Yes'	Yes'	5	0.42 ± 0.09 (NaN, 0.53, 0.30, NaN, 0.36, 0.48, NaN, 0.41)'	0.56 ± 0.08 (NaN, 0.66, 0.45, NaN, 0.51, 0.63, NaN, 0.57)'
ABarapaaapp'	12.65 ± 1.55'	36.27 ± 4.00'	ABarapaaapa'	16.50 ± 2.73'	41.81 ± 4.41'	Yes'	Yes'	6	0.78 ± 0.13 (NaN, 0.76, 0.78, 0.90, 0.72, NaN, 0.58, 0.94)'	0.87 ± 0.12 (NaN, 0.84, 0.86, 0.93, 0.80, NaN, 0.73, 1.08)'
ABplaaaaaap'	12.47 ± 2.61'	33.87 ± 4.11'	ABplaaaaaaa'	12.50 ± 2.55'	34.06 ± 4.46'	Yes'	Yes'	8	1.03 ± 0.32 (0.87, 0.96, 1.71, 0.77, 1.13, 0.65, 1.09, 1.10)'	1.01 ± 0.20 (0.90, 0.95, 1.42, 0.86, 1.08, 0.78, 1.08, 1.02)'
ABalaappaa'	11.37 ± 0.00'	32.74 ± 0.00'	ABalaappap'	50.53 ± 0.00'	83.13 ± 0.00'	Yes'	Yes'	1	0.23 ± 0.00 (NaN, NaN, NaN, 0.23, NaN, NaN, NaN, NaN)'	0.39 ± 0.00 (NaN, NaN, NaN, 0.39, NaN, NaN, NaN, NaN)'
ABalppaaaa'	6.02 ± 0.00'	21.99 ± 0.00'	ABalppaaap'	31.42 ± 0.00'	61.63 ± 0.00'	Yes'	Yes'	1	0.19 ± 0.00 (NaN, NaN, NaN, NaN, NaN, NaN, NaN, 0.19)'	0.36 ± 0.00 (NaN, NaN, NaN, NaN, NaN, NaN, NaN, 0.36)'
ABpraaapaav'	10.17 ± 1.07'	31.40 ± 1.54'	ABpraaapaad'	26.51 ± 4.29'	58.96 ± 6.16'	Yes'	Yes'	2	0.39 ± 0.02 (NaN, 0.40, NaN, NaN, 0.37, NaN, NaN, NaN)'	0.53 ± 0.03 (NaN, 0.56, NaN, NaN, 0.51, NaN, NaN, NaN)'
ABalaapppap'	14.71 ± 2.30'	38.48 ± 3.86'	ABalaapppaa'	19.16 ± 1.01'	45.03 ± 1.90'	Yes'	Yes'	4	0.77 ± 0.14 (NaN, NaN, 0.73, NaN, NaN, 0.96, 0.76, 0.63)'	0.86 ± 0.10 (NaN, NaN, 0.82, NaN, NaN, 0.99, 0.86, 0.75)'
ABalpapppap'	15.22 ± 2.45'	40.58 ± 3.77'	ABalpapppaa'	16.45 ± 4.29'	42.06 ± 6.83'	Yes'	Yes'	6	1.00 ± 0.40 (NaN, 1.11, 0.64, NaN, 0.67, 0.89, 0.98, 1.73)'	1.00 ± 0.25 (NaN, 1.16, 0.75, NaN, 0.78, 0.89, 1.00, 1.39)'
ABpraaaapppp'	19.28 ± 0.00'	49.33 ± 0.00'	ABpraaaapppa'	24.81 ± 0.00'	54.50 ± 0.00'	Yes'	Yes'	1	0.78 ± 0.00 (0.78, NaN, NaN, NaN, NaN, NaN, NaN, NaN)'	0.91 ± 0.00 (0.91, NaN, NaN, NaN, NaN, NaN, NaN, NaN)'
ABalpappaapp'	12.22 ± 0.00'	34.07 ± 0.00'	ABalpappaapa'	16.74 ± 0.00'	45.53 ± 0.00'	Yes'	Yes'	1	0.73 ± 0.00 (0.73, NaN, NaN, NaN, NaN, NaN, NaN, NaN)'	0.75 ± 0.00 (0.75, NaN, NaN, NaN, NaN, NaN, NaN, NaN)'
ABaraaaapaa'	12.78 ± 2.40'	35.18 ± 4.35'	ABaraaaapap'	18.71 ± 1.50'	46.00 ± 2.76'	Yes'	Yes'	7	0.68 ± 0.11 (NaN, 0.54, 0.62, 0.76, 0.64, 0.88, 0.73, 0.61)'	0.77 ± 0.09 (NaN, 0.64, 0.78, 0.85, 0.74, 0.91, 0.78, 0.67)'
ABpraaaappa'	6.55 ± 0.14'	23.00 ± 0.49'	ABpraaaappp'	28.70 ± 2.64'	60.03 ± 2.15'	Yes'	Yes'	2	0.23 ± 0.02 (0.24, NaN, NaN, NaN, NaN, 0.22, NaN, NaN)'	0.38 ± 0.02 (0.40, NaN, NaN, NaN, NaN, 0.37, NaN, NaN)'
ABalapaaaap'	15.15 ± 2.83'	39.61 ± 5.01'	ABalapaaaaa'	16.72 ± 0.54'	42.41 ± 1.89'	Yes'	Yes'	2	0.91 ± 0.20 (NaN, NaN, 0.77, 1.05, NaN, NaN, NaN, NaN)'	0.94 ± 0.16 (NaN, NaN, 0.82, 1.05, NaN, NaN, NaN, NaN)'
ABalpappaaa'	12.30 ± 0.00'	33.83 ± 0.00'	ABalpappaap'	30.47 ± 0.00'	61.51 ± 0.00'	Yes'	Yes'	1	0.40 ± 0.00 (NaN, NaN, NaN, NaN, NaN, NaN, 0.40, NaN)'	0.55 ± 0.00 (NaN, NaN, NaN, NaN, NaN, NaN, 0.55, NaN)'
ABpraaaaapv'	13.11 ± 3.09'	35.16 ± 5.60'	ABpraaaaapd'	17.71 ± 7.12'	43.94 ± 13.28'	Yes'	Yes'	2	0.77 ± 0.13 (NaN, NaN, 0.86, NaN, NaN, NaN, NaN, 0.67)'	0.82 ± 0.12 (NaN, NaN, 0.90, NaN, NaN, NaN, NaN, 0.73)'
ABalapaapap'	15.61 ± 2.41'	40.45 ± 4.24'	ABalapaapaa'	19.31 ± 3.30'	46.24 ± 5.28'	Yes'	Yes'	6	0.85 ± 0.31 (NaN, 0.71, 0.65, 0.65, 1.45, 0.72, NaN, 0.92)'	0.89 ± 0.21 (NaN, 0.81, 0.76, 0.74, 1.29, 0.81, NaN, 0.95)'
ABalpapappa'	10.79 ± 2.66'	32.13 ± 4.20'	ABalpapappp'	16.62 ± 2.39'	40.92 ± 4.18'	Yes'	Yes'	5	0.66 ± 0.19 (NaN, 0.42, 0.93, 0.73, NaN, 0.60, NaN, 0.60)'	0.79 ± 0.14 (NaN, 0.64, 1.00, 0.84, NaN, 0.77, NaN, 0.71)'
ABalpapapapa'	15.40 ± 0.00'	40.01 ± 0.00'	ABalpapapapp'	22.58 ± 0.00'	52.17 ± 0.00'	Yes'	Yes'	1	0.68 ± 0.00 (0.68, NaN, NaN, NaN, NaN, NaN, NaN, NaN)'	0.77 ± 0.00 (0.77, NaN, NaN, NaN, NaN, NaN, NaN, NaN)'
ABalpapaapp'	8.19 ± 1.33'	25.86 ± 2.92'	ABalpapaapa'	20.19 ± 0.00'	48.37 ± 0.80'	Yes'	Yes'	2	0.41 ± 0.07 (NaN, NaN, NaN, NaN, 0.36, NaN, 0.45, NaN)'	0.53 ± 0.05 (NaN, NaN, NaN, NaN, 0.50, NaN, 0.57, NaN)'
ABalapapapap'	9.65 ± 0.00'	30.39 ± 0.00'	ABalapapapaa'	10.51 ± 0.00'	33.73 ± 0.00'	Yes'	Yes'	1	0.92 ± 0.00 (0.92, NaN, NaN, NaN, NaN, NaN, NaN, NaN)'	0.90 ± 0.00 (0.90, NaN, NaN, NaN, NaN, NaN, NaN, NaN)'
ABalpaaapap'	12.93 ± 1.17'	35.47 ± 1.68'	ABalpaaapaa'	17.32 ± 2.80'	43.59 ± 5.03'	Yes'	Yes'	6	0.76 ± 0.14 (NaN, NaN, 0.84, 0.89, 0.67, 0.53, 0.89, 0.75)'	0.82 ± 0.10 (NaN, NaN, 0.91, 0.91, 0.77, 0.67, 0.89, 0.78)'
ABalpaaaapp'	12.75 ± 1.29'	35.34 ± 2.45'	ABalpaaaapa'	18.14 ± 2.18'	45.52 ± 4.29'	Yes'	Yes'	4	0.71 ± 0.08 (NaN, NaN, 0.80, NaN, 0.69, NaN, 0.62, 0.72)'	0.78 ± 0.04 (NaN, NaN, 0.83, NaN, 0.75, NaN, 0.75, 0.79)'
ABalappaapp'	18.19 ± 3.06'	43.81 ± 4.95'	ABalappaapa'	20.20 ± 2.88'	46.88 ± 3.70'	Yes'	Yes'	7	0.92 ± 0.22 (NaN, 0.99, 1.15, 0.68, 0.62, 1.19, 0.80, 1.01)'	0.94 ± 0.14 (NaN, 0.99, 1.08, 0.78, 0.75, 1.09, 0.87, 1.04)'
ABalappapap'	17.26 ± 1.93'	42.53 ± 2.78'	ABalappapaa'	18.59 ± 0.97'	45.30 ± 1.38'	Yes'	Yes'	3	0.93 ± 0.09 (NaN, NaN, NaN, 1.03, NaN, 0.85, NaN, 0.90)'	0.94 ± 0.06 (NaN, NaN, NaN, 1.00, NaN, 0.88, NaN, 0.94)'
ABalappppaap'	12.27 ± 0.00'	34.09 ± 0.00'	ABalappppaaa'	20.20 ± 0.00'	54.12 ± 0.00'	Yes'	Yes'	1	0.61 ± 0.00 (0.61, NaN, NaN, NaN, NaN, NaN, NaN, NaN)'	0.63 ± 0.00 (0.63, NaN, NaN, NaN, NaN, NaN, NaN, NaN)'
ABalpppaapv'	13.80 ± 2.36'	37.59 ± 2.26'	ABalpppaapd'	14.41 ± 4.59'	36.86 ± 7.69'	Yes'	No'	2	0.98 ± 0.15 (NaN, NaN, 0.88, NaN, NaN, 1.09, NaN, NaN)'	1.04 ± 0.15 (NaN, NaN, 0.93, NaN, NaN, 1.15, NaN, NaN)'
ABalaapaapa'	12.66 ± 5.01'	34.68 ± 7.97'	ABalaapaapp'	12.69 ± 2.06'	34.36 ± 3.76'	Yes'	No'	2	0.98 ± 0.24 (NaN, 1.15, NaN, NaN, NaN, NaN, NaN, 0.81)'	1.00 ± 0.12 (NaN, 1.09, NaN, NaN, NaN, NaN, NaN, 0.92)'
ABarappaaap'	14.45 ± 2.86'	37.90 ± 4.81'	ABarappaaaa'	14.26 ± 3.74'	38.76 ± 5.93'	No'	Yes'	5	1.09 ± 0.40 (NaN, NaN, 1.60, 1.31, 0.55, 1.13, NaN, 0.88)'	1.00 ± 0.23 (NaN, NaN, 1.23, 1.14, 0.65, 1.07, NaN, 0.92)'
ABarpapaaap'	13.63 ± 2.86'	36.27 ± 5.48'	ABarpapaaaa'	13.03 ± 3.18'	35.35 ± 5.56'	No'	No'	7	1.10 ± 0.36 (0.70, NaN, 1.28, 1.00, 1.75, 0.77, 1.25, 0.98)'	1.04 ± 0.19 (0.78, NaN, 1.16, 1.03, 1.35, 0.86, 1.12, 1.00)'	Its sister cell has ring gang fate; its symmetric apoptotic cell ABplaaaaaap has an initially smaller cell size; its apoptosis fate is specified for hermaphrodite.
ABalaaaalar'	16.20 ± 1.56'	41.07 ± 2.19'	ABalaaaalal'	13.94 ± 2.46'	37.11 ± 4.42'	No'	No'	5	1.19 ± 0.25 (NaN, 1.56, NaN, 1.08, 0.88, NaN, 1.18, 1.27)'	1.12 ± 0.17 (NaN, 1.34, NaN, 1.06, 0.91, NaN, 1.07, 1.23)'	Its sister cell has ring gang fate; its symmetric apoptotic cell ABalaapaaal has an initially smaller cell size.
ABalaaaarra'	14.96 ± 0.72'	38.90 ± 0.64'	ABalaaaarrp'	11.71 ± 2.21'	32.78 ± 4.22'	No'	No'	2	1.31 ± 0.31 (1.09, 1.52, NaN, NaN, NaN, NaN, NaN, NaN)'	1.20 ± 0.17 (1.08, 1.32, NaN, NaN, NaN, NaN, NaN, NaN)'	Its sister cell has ring gang fate; its symmetric apoptotic cell ABalaapaaal has an initially smaller cell size.
ABalpppapppp'	19.03 ± 0.00'	47.13 ± 0.00'	ABalpppapppa'	17.64 ± 0.00'	45.18 ± 0.00'	No'	No'	1	1.08 ± 0.00 (1.08, NaN, NaN, NaN, NaN, NaN, NaN, NaN)'	1.04 ± 0.00 (1.04, NaN, NaN, NaN, NaN, NaN, NaN, NaN)'	Its sister cell has ring gang fate; its symmetric apoptotic cell ABpraaaapppp has an initially smaller cell size.
ABprppaaaapa'	14.65 ± 0.00'	37.74 ± 0.00'	ABprppaaaapp'	13.73 ± 0.00'	36.55 ± 0.00'	No'	No'	1	1.07 ± 0.00 (1.07, NaN, NaN, NaN, NaN, NaN, NaN, NaN)'	1.03 ± 0.00 (1.03, NaN, NaN, NaN, NaN, NaN, NaN, NaN)'	Its sister cell has ring gang fate; its symmetric apoptotic cell ABplppaaaapa has an initially smaller cell size.
ABalapappaap'	16.43 ± 0.00'	43.24 ± 0.00'	ABalapappaaa'	10.79 ± 0.00'	34.40 ± 0.00'	No'	No'	1	1.52 ± 0.00 (1.52, NaN, NaN, NaN, NaN, NaN, NaN, NaN)'	1.26 ± 0.00 (1.26, NaN, NaN, NaN, NaN, NaN, NaN, NaN)'	Its sister cell has ring gang fate; its symmetric apoptotic cell ABalappppaap has an initially smaller cell size.
ABalppaappa'	17.36 ± 1.15'	44.04 ± 3.87'	ABalppaappp'	15.76 ± 2.56'	39.94 ± 4.21'	No'	No'	3	1.12 ± 0.17 (0.93, 1.26, NaN, NaN, NaN, NaN, NaN, 1.17)'	1.10 ± 0.05 (1.07, 1.16, NaN, NaN, NaN, NaN, NaN, 1.08)'	Its sister cell has ring gang fate; its symmetric apoptotic cell ABalaapappa dosen't have an initially smaller cell size.
ABalaapappa'	20.73 ± 2.48'	50.04 ± 4.08'	ABalaapappp'	20.50 ± 1.78'	49.43 ± 3.57'	No'	No'	2	1.01 ± 0.03 (NaN, NaN, NaN, NaN, 1.03, 0.99, NaN, NaN)'	1.01 ± 0.01 (NaN, NaN, NaN, NaN, 1.02, 1.01, NaN, NaN)'	Its sister cell has ring gang fate; its symmetric apoptotic cell ABalppaappa dosen't have an initially smaller cell size.
ABplpaappppp'	15.79 ± 0.00'	44.03 ± 0.00'	ABplpaappppa'	9.64 ± 0.00'	37.00 ± 0.00'	No'	No'	1	1.64 ± 0.00 (1.64, NaN, NaN, NaN, NaN, NaN, NaN, NaN)'	1.19 ± 0.00 (1.19, NaN, NaN, NaN, NaN, NaN, NaN, NaN)'	Its sister cell has ring gang fate; its symmetric apoptotic cell ABprpaappppp has no comparable initial cell size data.
ABalpaaappa'	18.19 ± 1.74'	44.67 ± 3.16'	ABalpaaappp'	12.65 ± 0.78'	34.97 ± 1.74'	No'	No'	4	1.44 ± 0.13 (NaN, 1.50, 1.25, NaN, 1.54, NaN, 1.47, NaN)'	1.28 ± 0.09 (NaN, 1.26, 1.17, NaN, 1.32, NaN, 1.36, NaN)'	Its sister cell has pharynx fate; its symmetric cell ABarapaappa doesn't undergo apoptosis.
MSaapapap'	16.10 ± 7.86'	39.98 ± 12.13'	MSaapapaa'	15.15 ± 5.18'	39.09 ± 8.79'	No'	No'	5	1.21 ± 0.66 (NaN, 1.76, 0.60, 1.63, 0.38, 1.67, NaN, NaN)'	1.08 ± 0.41 (NaN, 1.45, 0.74, 1.27, 0.54, 1.41, NaN, NaN)'	Its sister cell has pharynx fate; its symmetric apoptotic cell MSpapapap has an initially smaller cell size.
MSpppaaa'	36.90 ± 3.49'	69.31 ± 4.10'	MSpppaap'	36.17 ± 6.51'	68.52 ± 6.67'	No'	No'	3	1.04 ± 0.14 (0.92, NaN, NaN, 1.19, NaN, 0.99, NaN, NaN)'	1.02 ± 0.07 (0.95, NaN, NaN, 1.10, NaN, 1.00, NaN, NaN)'	It undergoes apoptosis at very late stage.
