# Supplementary material for: Cell lineage-resolved embryonic morphological map reveals novel signaling regulating cell fate and size asymmetry
Source: Research Square preprint supplement (doi:10.21203/rs.3.rs-4664717/v1), 2024-08-30
Supplement: Supplementary file 9 [file Table S13.xlsx]

## Sheet: Table S
File name	Data storage
“DivisionCell\{embryo sample}_{time point}_division.txt”	This file contains the dividing cell.
“GuiNeighbor\{embryo sample}_{time point}_guiNeighbor.txt”	This file contains the cell-cell contact relationship. For each row inside the file, the neighbors of the first cell are listed after it.
“LostCell\{embryo sample}_{time point}_lostCell.txt”	This file contains the cell that fail to be segmented.
“RawMemb\{embryo sample}_{time point}_rawMemb.nii.gz”	This file contains the compressed image of cell membrane fluorescence.
“SegCell\{embryo sample}_{time point}_segCell.nii.gz”	This file contains the segmented image of cell membrane fluorescence.
“TPCell\{embryo sample}_{time point}_cells.txt”	This file contains the cell that exists.
“{embryo sample}_lifescycle.csv”	This file contains the time point when the cell exist.
“{embryo sample}_volume.csv”	This file contains the volume of the cell.
“{embryo sample}_surface.csv”	This file contains the surface area of the cell.
“{embryo sample}_Stat.csv”	This file contains the area of the cell-cell contact.
