# Supplementary material for: Cell lineage-resolved embryonic morphological map reveals novel signaling regulating cell fate and size asymmetry
Source: Research Square preprint supplement (doi:10.21203/rs.3.rs-4664717/v1), 2024-08-30
Supplement: Supplementary file 11 [file Table S14.xlsx]

## Sheet: Table S
Data source	Labeled gene	Embryo file name	Edited time point for a complete embryo	Type of construct	Remark
X.-T. Huang et al., Bioinformatics 33, 1528-1535 (2017)'	nhr-25'	CD120911NHR25p4.csv'	120	Protein Fusion'	/'
X.-T. Huang et al., Bioinformatics 33, 1528-1535 (2017)'	nhr-25'	CD120924NHR25p2.csv'	140	Protein Fusion'	/'
X.-T. Huang et al., Bioinformatics 33, 1528-1535 (2017)'	nhr-25'	CD120924NHR25p3.csv'	130	Protein Fusion'	/'
X.-T. Huang et al., Bioinformatics 33, 1528-1535 (2017)'	nhr-25'	CD130108NHR25p1.csv'	139	Protein Fusion'	/'
X.-T. Huang et al., Bioinformatics 33, 1528-1535 (2017)'	nhr-25'	CD130108NHR25p2.csv'	140	Protein Fusion'	/'
X.-T. Huang et al., Bioinformatics 33, 1528-1535 (2017)'	nhr-25'	CD130108NHR25p3.csv'	140	Protein Fusion'	/'
X.-T. Huang et al., Bioinformatics 33, 1528-1535 (2017)'	nhr-25'	CD140102NHR25p2.csv'	150	Protein Fusion'	/'
X.-T. Huang et al., Bioinformatics 33, 1528-1535 (2017)'	nhr-25'	CD140102NHR25p3.csv'	155	Protein Fusion'	/'
X.-T. Huang et al., Bioinformatics 33, 1528-1535 (2017)'	nhr-25'	CD140109NHR25p1.csv'	135	Protein Fusion'	/'
X.-T. Huang et al., Bioinformatics 33, 1528-1535 (2017)'	nhr-25'	CD140109NHR25p2.csv'	135	Protein Fusion'	/'
X.-T. Huang et al., Bioinformatics 33, 1528-1535 (2017)'	nhr-25'	CD140109NHR25p3.csv'	145	Protein Fusion'	/'
X.-T. Huang et al., Bioinformatics 33, 1528-1535 (2017)'	nhr-25'	CD140217NHR25p1.csv'	145	Protein Fusion'	/'
X.-T. Huang et al., Bioinformatics 33, 1528-1535 (2017)'	nhr-25'	CD140217NHR25p2.csv'	145	Protein Fusion'	/'
X.-T. Huang et al., Bioinformatics 33, 1528-1535 (2017)'	nhr-25'	CD140217NHR25p3.csv'	145	Protein Fusion'	/'
X.-T. Huang et al., Bioinformatics 33, 1528-1535 (2017)'	nhr-25'	CD140218NHR25p2.csv'	145	Protein Fusion'	/'
X.-T. Huang et al., Bioinformatics 33, 1528-1535 (2017)'	nhr-25'	CD140218NHR25p3.csv'	150	Protein Fusion'	/'
G. Guan et al., Dev. Genes Evol. 230, 265-278 (2020)'	hlh-1'	CD120711hlh1p2.csv'	145	Promoter Fusion'	/'
G. Guan et al., Dev. Genes Evol. 230, 265-278 (2020)'	hlh-1'	CD120711hlh1p3.csv'	145	Promoter Fusion'	/'
G. Guan et al., Dev. Genes Evol. 230, 265-278 (2020)'	hlh-1'	CD120726hlh1p1.csv'	155	Promoter Fusion'	/'
G. Guan et al., Dev. Genes Evol. 230, 265-278 (2020)'	hlh-1'	CD120726hlh1p2.csv'	150	Promoter Fusion'	/'
G. Guan et al., Dev. Genes Evol. 230, 265-278 (2020)'	hlh-1'	CD120726hlh1p4.csv'	150	Promoter Fusion'	/'
G. Guan et al., Dev. Genes Evol. 230, 265-278 (2020)'	hlh-1'	CD140221hlh1p1.csv'	150	Promoter Fusion'	/'
G. Guan et al., Dev. Genes Evol. 230, 265-278 (2020)'	hlh-1'	CD140221hlh1p2.csv'	155	Promoter Fusion'	/'
G. Guan et al., Dev. Genes Evol. 230, 265-278 (2020)'	hlh-1'	CD140221hlh1p3.csv'	160	Promoter Fusion'	/'
G. Guan et al., Dev. Genes Evol. 230, 265-278 (2020)'	hlh-1'	CD140222hlh1p1.csv'	165	Promoter Fusion'	/'
G. Guan et al., Dev. Genes Evol. 230, 265-278 (2020)'	hlh-1'	CD140222hlh1p2.csv'	145	Promoter Fusion'	/'
G. Guan et al., Dev. Genes Evol. 230, 265-278 (2020)'	hlh-1'	CD140224hlh1p1.csv'	145	Promoter Fusion'	/'
G. Guan et al., Dev. Genes Evol. 230, 265-278 (2020)'	hlh-1'	CD140224hlh1p2.csv'	140	Promoter Fusion'	/'
G. Guan et al., Dev. Genes Evol. 230, 265-278 (2020)'	hlh-1'	CD140224hlh1p3.csv'	140	Promoter Fusion'	/'
J.I. Murray et al., Genome Res. 22, 1282-1294 (2012)'	nhr-25'	CD20071005_nhr-25_h4_8.csv'	200	Protein Fusion'	/'
J.I. Murray et al., Genome Res. 22, 1282-1294 (2012)'	nhr-25'	CD20071008_nhr-25_h4_8.csv'	235	Protein Fusion'	/'
J.I. Murray et al., Genome Res. 22, 1282-1294 (2012)'	nhr-25'	CD20080206_nhr-25_3H4_8.csv'	190	Protein Fusion'	/'
J.I. Murray et al., Genome Res. 22, 1282-1294 (2012)'	hlh-1'	CD20070111_hlh1_4.csv'	200	Promoter Fusion'	/'
J.I. Murray et al., Genome Res. 22, 1282-1294 (2012)'	hlh-1'	CD20070313_rw10026_hlh1_8.csv'	190	Promoter Fusion'	/'
J.I. Murray et al., Genome Res. 22, 1282-1294 (2012)'	hlh-1'	CD20070904_hlh-1_4.csv'	185	Promoter Fusion'	/'
J.I. Murray et al., Genome Res. 22, 1282-1294 (2012)'	hlh-1'	CD20080527_hlh-1_6B4_3_L1.csv'	180	Protein Fusion'	/'
J.I. Murray et al., Genome Res. 22, 1282-1294 (2012)'	glp-1'	CD20080714_glp-1_5_L2.csv'	150	Promoter Fusion'	/'
J.I. Murray et al., Genome Res. 22, 1282-1294 (2012)'	glp-1'	CD20090601_glp-1_4_L1.csv'	140	Promoter Fusion'	/'
J.I. Murray et al., Genome Res. 22, 1282-1294 (2012)'	alr-1'	CD20081016_alr-1_10A2_3_L1.csv'	135	Protein Fusion'	/'
J.I. Murray et al., Genome Res. 22, 1282-1294 (2012)'	alr-1'	CD20081016_alr-1_10A2_3_L2.csv'	130	Protein Fusion'	/'
J.I. Murray et al., Genome Res. 22, 1282-1294 (2012)'	ceh-6'	CD20090215_ceh-6_9H1_B_L1.csv'	180	Protein Fusion'	/'
J.I. Murray et al., Genome Res. 22, 1282-1294 (2012)'	ceh-14'	CD20081010_ceh-14_8F2_14_L1.csv'	150	Protein Fusion'	/'
J.I. Murray et al., Genome Res. 22, 1282-1294 (2012)'	ceh-16'	CD20081013_ceh-16_b7_L1.csv'	165	Promoter Fusion'	/'
J.I. Murray et al., Genome Res. 22, 1282-1294 (2012)'	ceh-27'	CD20080709_ceh-27_1_L1.csv'	145	Promoter Fusion'	/'
J.I. Murray et al., Genome Res. 22, 1282-1294 (2012)'	ceh-32'	CD20080731_ceh-32_4_L1.csv'	130	Promoter Fusion'	/'
J.I. Murray et al., Genome Res. 22, 1282-1294 (2012)'	ceh-32'	CD20080731_ceh-32_4_L2.csv'	140	Promoter Fusion'	/'
J.I. Murray et al., Genome Res. 22, 1282-1294 (2012)'	ceh-36'	CD20080822_ceh-36b4_L1.csv'	130	Promoter Fusion'	/'
J.I. Murray et al., Genome Res. 22, 1282-1294 (2012)'	ceh-36'	CD20080902_ceh-36B4_L1.csv'	120	Promoter Fusion'	/'
J.I. Murray et al., Genome Res. 22, 1282-1294 (2012)'	ceh-36'	CD20081108_ceh-36_b13_L1.csv'	145	Promoter Fusion'	/'
J.I. Murray et al., Genome Res. 22, 1282-1294 (2012)'	ceh-36'	CD20090409_ceh-36_RW10598_L1.csv'	130	Promoter Fusion'	/'
J.I. Murray et al., Genome Res. 22, 1282-1294 (2012)'	ceh-41'	CD20080808_ceh-41_2_L1.csv'	135	Promoter Fusion'	/'
J.I. Murray et al., Genome Res. 22, 1282-1294 (2012)'	ceh-41'	CD20080819_ceh-41_14_L1.csv'	125	Promoter Fusion'	/'
J.I. Murray et al., Genome Res. 22, 1282-1294 (2012)'	ceh-43'	CD20071217_ceh-432x3.csv'	210	Promoter Fusion'	/'
J.I. Murray et al., Genome Res. 22, 1282-1294 (2012)'	ceh-43'	CD20090407_ceh-43_RW10345_L1.csv'	145	Promoter Fusion'	/'
J.I. Murray et al., Genome Res. 22, 1282-1294 (2012)'	ceh-43'	CD20090407_ceh-43_RW10345_L2.csv'	135	Promoter Fusion'	/'
J.I. Murray et al., Genome Res. 22, 1282-1294 (2012)'	ceh-43'	CD20090806_ceh-43_RW10154_L1.csv'	155	Promoter Fusion'	/'
J.I. Murray et al., Genome Res. 22, 1282-1294 (2012)'	cnd-1'	CD20060627_cnd1_4-2.csv'	200	Promoter Fusion'	/'
J.I. Murray et al., Genome Res. 22, 1282-1294 (2012)'	cnd-1'	CD20060628_cnd1_4-2.csv'	200	Promoter Fusion'	/'
J.I. Murray et al., Genome Res. 22, 1282-1294 (2012)'	cnd-1'	CD20060704_RW10029_cnd1_9.csv'	175	Promoter Fusion'	/'
J.I. Murray et al., Genome Res. 22, 1282-1294 (2012)'	cnd-1'	CD20060714_cnd1_3.csv'	200	Promoter Fusion'	/'
J.I. Murray et al., Genome Res. 22, 1282-1294 (2012)'	cnd-1'	CD20060716_cnd1_3.csv'	200	Promoter Fusion'	/'
J.I. Murray et al., Genome Res. 22, 1282-1294 (2012)'	cnd-1'	CD20080428_cnd-1_3C3_6.csv'	210	Protein Fusion'	/'
J.I. Murray et al., Genome Res. 22, 1282-1294 (2012)'	cnd-1'	CD20080429_cnd-1_3C3_11.csv'	190	Protein Fusion'	/'
J.I. Murray et al., Genome Res. 22, 1282-1294 (2012)'	cnd-1'	CD20080509_cnd-1_3C3_6yy_L1.csv'	165	Protein Fusion'	/'
J.I. Murray et al., Genome Res. 22, 1282-1294 (2012)'	cnd-1'	CD20080509_cnd-1_3C3_6yy_L2.csv'	155	Protein Fusion'	/'
J.I. Murray et al., Genome Res. 22, 1282-1294 (2012)'	dmd-4'	CD20080815_dmd-4b_L1.csv'	130	Promoter Fusion'	/'
J.I. Murray et al., Genome Res. 22, 1282-1294 (2012)'	dpl-1'	CD20090803_dpl-1_8_L2.csv'	135	Promoter Fusion'	/'
J.I. Murray et al., Genome Res. 22, 1282-1294 (2012)'	dve-1'	CD20080905_dve-1_15_L1.csv'	155	Promoter Fusion'	/'
J.I. Murray et al., Genome Res. 22, 1282-1294 (2012)'	egl-5'	CD20070523_egl5_sk.csv'	350	Promoter Fusion'	/'
J.I. Murray et al., Genome Res. 22, 1282-1294 (2012)'	egl-5'	CD20080728_egl-5_7E3_3_L1.csv'	200	Protein Fusion'	/'
J.I. Murray et al., Genome Res. 22, 1282-1294 (2012)'	egl-5'	CD20090220_egl-5_7E3_12_L1.csv'	240	Protein Fusion'	/'
J.I. Murray et al., Genome Res. 22, 1282-1294 (2012)'	elt-1'	CD20080128_elt-1_3.csv'	213	Promoter Fusion'	/'
J.I. Murray et al., Genome Res. 22, 1282-1294 (2012)'	elt-2'	CD20070810_elt-2_sk.csv'	240	Promoter Fusion'	/'
J.I. Murray et al., Genome Res. 22, 1282-1294 (2012)'	elt-2'	CD20080911_elt-2_7E1_5_L1.csv'	145	Protein Fusion'	/'
J.I. Murray et al., Genome Res. 22, 1282-1294 (2012)'	elt-6'	CD20070731_elt-6_8.csv'	210	Promoter Fusion'	/'
J.I. Murray et al., Genome Res. 22, 1282-1294 (2012)'	elt-6'	CD20070817_elt-6_5.csv'	200	Promoter Fusion'	/'
J.I. Murray et al., Genome Res. 22, 1282-1294 (2012)'	elt-6'	CD20090701_elt-6_RW10178_L1.csv'	140	Promoter Fusion'	/'
J.I. Murray et al., Genome Res. 22, 1282-1294 (2012)'	elt-6'	CD20090701_elt-6_RW10178_L2.csv'	140	Promoter Fusion'	/'
J.I. Murray et al., Genome Res. 22, 1282-1294 (2012)'	elt-7'	CD20070310_elt7_c2a.csv'	230	Promoter Fusion'	/'
J.I. Murray et al., Genome Res. 22, 1282-1294 (2012)'	end-1'	CD20071015_end-1_1.csv'	200	Promoter Fusion'	/'
J.I. Murray et al., Genome Res. 22, 1282-1294 (2012)'	end-3'	CD20060718_end3_2xx.csv'	190	Promoter Fusion'	/'
J.I. Murray et al., Genome Res. 22, 1282-1294 (2012)'	end-3'	CD20060914_end3_2.csv'	206	Promoter Fusion'	/'
J.I. Murray et al., Genome Res. 22, 1282-1294 (2012)'	end-3'	CD20070901_end-3_2.csv'	210	Promoter Fusion'	/'
J.I. Murray et al., Genome Res. 22, 1282-1294 (2012)'	eor-1'	CD20090217_eor-1_9G1_13_L1.csv'	150	Protein Fusion'	/'
J.I. Murray et al., Genome Res. 22, 1282-1294 (2012)'	eor-1'	CD20090217_eor-1_9G1_13_L2.csv'	150	Protein Fusion'	/'
J.I. Murray et al., Genome Res. 22, 1282-1294 (2012)'	fkh-4'	CD20090331_fkh-4_11D3b24.csv'	90	Protein Fusion'	/'
J.I. Murray et al., Genome Res. 22, 1282-1294 (2012)'	fkh-4'	CD20090415_fkh-4_11D3b24_L1.csv'	105	Protein Fusion'	/'
J.I. Murray et al., Genome Res. 22, 1282-1294 (2012)'	fkh-4'	CD20090415_fkh-4_11D3b24_L2.csv'	110	Protein Fusion'	/'
J.I. Murray et al., Genome Res. 22, 1282-1294 (2012)'	hlh-3'	CD20071013_hlh_3_5.csv'	200	Promoter Fusion'	/'
J.I. Murray et al., Genome Res. 22, 1282-1294 (2012)'	hnd-1'	CD20070727_hnd-1_6.csv'	212	Promoter Fusion'	/'
J.I. Murray et al., Genome Res. 22, 1282-1294 (2012)'	hnd-1'	CD20070801_hnd-1_6.csv'	181	Promoter Fusion'	/'
J.I. Murray et al., Genome Res. 22, 1282-1294 (2012)'	hnd-1'	CD20080524_hnd-1_6_L1.csv'	190	Promoter Fusion'	/'
J.I. Murray et al., Genome Res. 22, 1282-1294 (2012)'	hnd-1'	CD20080524_hnd-1_6_L2.csv'	190	Promoter Fusion'	/'
J.I. Murray et al., Genome Res. 22, 1282-1294 (2012)'	hnd-1'	CD20070801_hnd-1_F396.csv'	200	Protein Fusion'	/'
J.I. Murray et al., Genome Res. 22, 1282-1294 (2012)'	irx-1'	CD20090531_irx-1_b1_L1.csv'	150	Promoter Fusion'	/'
J.I. Murray et al., Genome Res. 22, 1282-1294 (2012)'	lin-1'	CD20060719_lin1_10.csv'	250	Promoter Fusion'	/'
J.I. Murray et al., Genome Res. 22, 1282-1294 (2012)'	lin-11'	CD200806024_lin-11_7H3_1_L1.csv'	135	Protein Fusion'	/'
J.I. Murray et al., Genome Res. 22, 1282-1294 (2012)'	lin-13'	CD20080814_lin-13_6B12_1_L1.csv'	80	Protein Fusion'	/'
J.I. Murray et al., Genome Res. 22, 1282-1294 (2012)'	lin-13'	CD20080814_lin-13_6B12_1_L2.csv'	125	Protein Fusion'	/'
J.I. Murray et al., Genome Res. 22, 1282-1294 (2012)'	lin-26'	CD20080812_lin-26_1_L1.csv'	120	Promoter Fusion'	/'
J.I. Murray et al., Genome Res. 22, 1282-1294 (2012)'	lin-32'	CD20080923_lin-32_1_L1.csv'	150	Promoter Fusion'	/'
J.I. Murray et al., Genome Res. 22, 1282-1294 (2012)'	lin-39'	CD20070719_lin-39_10.csv'	200	Promoter Fusion'	/'
J.I. Murray et al., Genome Res. 22, 1282-1294 (2012)'	lin-39'	CD20071015_lin-39_9.csv'	200	Promoter Fusion'	/'
J.I. Murray et al., Genome Res. 22, 1282-1294 (2012)'	lin-39'	CD20080218_lin-39_3d3_6.csv'	375	Protein Fusion'	/'
J.I. Murray et al., Genome Res. 22, 1282-1294 (2012)'	med-2'	CD20070721_med-2_2.csv'	190	Promoter Fusion'	/'
J.I. Murray et al., Genome Res. 22, 1282-1294 (2012)'	med-2'	CD20080528_med-2_6B3_1_L2.csv'	160	Protein Fusion'	/'
J.I. Murray et al., Genome Res. 22, 1282-1294 (2012)'	mep-1'	CD20090401_mep-1_11C1_8_L1.csv'	132	Protein Fusion'	/'
J.I. Murray et al., Genome Res. 22, 1282-1294 (2012)'	mml-1'	CD20070802_mml1_b.csv'	190	Promoter Fusion'	/'
J.I. Murray et al., Genome Res. 22, 1282-1294 (2012)'	mml-1'	CD20070804_mml-1_5.csv'	190	Promoter Fusion'	/'
J.I. Murray et al., Genome Res. 22, 1282-1294 (2012)'	nhr-23'	CD200806025_nhr-23_gsIs269_L1.csv'	150	Protein Fusion'	/'
J.I. Murray et al., Genome Res. 22, 1282-1294 (2012)'	nhr-49'	CD20090813_nhr-49b_5_L1.csv'	160	Promoter Fusion'	/'
J.I. Murray et al., Genome Res. 22, 1282-1294 (2012)'	nhr-67'	CD20080929_nhr-67_3_L1.csv'	150	Promoter Fusion'	/'
J.I. Murray et al., Genome Res. 22, 1282-1294 (2012)'	nhr-67'	CD20080929_nhr-67_3_L2.csv'	130	Promoter Fusion'	/'
J.I. Murray et al., Genome Res. 22, 1282-1294 (2012)'	nob-1'	CD20090225_nob-1_L2.csv'	155	Promoter Fusion'	/'
J.I. Murray et al., Genome Res. 22, 1282-1294 (2012)'	nob-1'	CD20090529_nob-1_b26_L1.csv'	156	Promoter Fusion'	/'
J.I. Murray et al., Genome Res. 22, 1282-1294 (2012)'	nob-1'	CD20090605_nob-1_b26_L1.csv'	155	Promoter Fusion'	/'
J.I. Murray et al., Genome Res. 22, 1282-1294 (2012)'	nob-1'	CD20071212nob1GFP.csv'	250	Protein Fusion'	/'
J.I. Murray et al., Genome Res. 22, 1282-1294 (2012)'	nob-1'	CD20080303nob-1GFP.csv'	250	Protein Fusion'	/'
J.I. Murray et al., Genome Res. 22, 1282-1294 (2012)'	pal-1'	CD20070720_pal-1_3.csv'	215	Promoter Fusion'	/'
J.I. Murray et al., Genome Res. 22, 1282-1294 (2012)'	pal-1'	CD20090220_pal-1_7A2_9_L1.csv'	135	Protein Fusion'	/'
J.I. Murray et al., Genome Res. 22, 1282-1294 (2012)'	pal-1'	CD20090609_pal-1_7A2_2_L2.csv'	140	Protein Fusion'	/'
J.I. Murray et al., Genome Res. 22, 1282-1294 (2012)'	pax-3'	CD20080925_pax-3_3_L1.csv'	145	Promoter Fusion'	/'
J.I. Murray et al., Genome Res. 22, 1282-1294 (2012)'	pax-3'	CD20081022_pax-3_1_L1.csv'	150	Promoter Fusion'	/'
J.I. Murray et al., Genome Res. 22, 1282-1294 (2012)'	pes-1'	CD20081031_pes-1_7_L1.csv'	155	Promoter Fusion'	/'
J.I. Murray et al., Genome Res. 22, 1282-1294 (2012)'	pes-1'	CD20081031_pes-1_7_L2.csv'	145	Promoter Fusion'	/'
J.I. Murray et al., Genome Res. 22, 1282-1294 (2012)'	pha-4'	CD20060629_pha4_b2.csv'	200	Promoter Fusion'	/'
J.I. Murray et al., Genome Res. 22, 1282-1294 (2012)'	pha-4'	CD20060706_pha4_b2.csv'	200	Promoter Fusion'	/'
J.I. Murray et al., Genome Res. 22, 1282-1294 (2012)'	pha-4'	CD20060817_pha4_b2.csv'	220	Promoter Fusion'	/'
J.I. Murray et al., Genome Res. 22, 1282-1294 (2012)'	pha-4'	CD20060818_pha4_b2.csv'	201	Promoter Fusion'	/'
J.I. Murray et al., Genome Res. 22, 1282-1294 (2012)'	pha-4'	CD20061215_pha4I2L_11.csv'	200	Promoter Fusion'	/'
J.I. Murray et al., Genome Res. 22, 1282-1294 (2012)'	pha-4'	CD20070305_pha4I2L_6.csv'	200	Promoter Fusion'	/'
J.I. Murray et al., Genome Res. 22, 1282-1294 (2012)'	pha-4'	CD20070306_pha4_I2L_3.csv'	225	Promoter Fusion'	/'
J.I. Murray et al., Genome Res. 22, 1282-1294 (2012)'	pha-4'	CD20070314_pha4A1L_20_10026.csv'	170	Promoter Fusion'	/'
J.I. Murray et al., Genome Res. 22, 1282-1294 (2012)'	pha-4'	CD20070319_pha4_I1LBBB.csv'	190	Promoter Fusion'	/'
J.I. Murray et al., Genome Res. 22, 1282-1294 (2012)'	pha-4'	CD20080418_pha-4_3E3C5_1.csv'	250	Protein Fusion'	/'
J.I. Murray et al., Genome Res. 22, 1282-1294 (2012)'	pha-4'	CD20080507_pha-4_3E3C5_1.csv'	190	Protein Fusion'	/'
J.I. Murray et al., Genome Res. 22, 1282-1294 (2012)'	pha-4'	CD20080507_pha-4_3E3C5_1xx.csv'	150	Protein Fusion'	/'
J.I. Murray et al., Genome Res. 22, 1282-1294 (2012)'	pha-4'	CD20080508_pha-4_3E3C5_1_L2.csv'	130	Protein Fusion'	/'
J.I. Murray et al., Genome Res. 22, 1282-1294 (2012)'	pha-4'	CD20080508_pha-4_3E3C5_1yy_L1.csv'	185	Protein Fusion'	/'
J.I. Murray et al., Genome Res. 22, 1282-1294 (2012)'	pha-4'	CD20080508_pha-4_3E3C5_1yy_L2.csv'	160	Protein Fusion'	/'
J.I. Murray et al., Genome Res. 22, 1282-1294 (2012)'	ref-1'	CD20081014_ref-1_2_L1.csv'	160	Promoter Fusion'	/'
J.I. Murray et al., Genome Res. 22, 1282-1294 (2012)'	ref-1'	CD20081014_ref-1_2_L2.csv'	150	Promoter Fusion'	/'
J.I. Murray et al., Genome Res. 22, 1282-1294 (2012)'	ref-2'	CD20081030_ref-2a_14_L2.csv'	130	Promoter Fusion'	/'
J.I. Murray et al., Genome Res. 22, 1282-1294 (2012)'	sdz-38'	CD20081027_sdz-38_1_L1.csv'	190	Promoter Fusion'	/'
J.I. Murray et al., Genome Res. 22, 1282-1294 (2012)'	sea-1'	CD20080805_sea-1_5_L1.csv'	140	Promoter Fusion'	/'
J.I. Murray et al., Genome Res. 22, 1282-1294 (2012)'	swsn-7'	CD20071013_C08B11_3_6.csv'	205	Promoter Fusion'	/'
J.I. Murray et al., Genome Res. 22, 1282-1294 (2012)'	swsn-7'	CD20071026_C08B11_3b.csv'	210	Promoter Fusion'	/'
J.I. Murray et al., Genome Res. 22, 1282-1294 (2012)'	tbx-8'	CD20070803_tbx-8_6.csv'	190	Promoter Fusion'	/'
J.I. Murray et al., Genome Res. 22, 1282-1294 (2012)'	tbx-8'	CD20071103_tbx-8_10.csv'	195	Promoter Fusion'	/'
J.I. Murray et al., Genome Res. 22, 1282-1294 (2012)'	tbx-8'	CD20080708_tbx-8_7G2_1_L2.csv'	129	Protein Fusion'	/'
J.I. Murray et al., Genome Res. 22, 1282-1294 (2012)'	tbx-8'	CD200807127_tbx-8_7G2_1.csv'	260	Protein Fusion'	/'
J.I. Murray et al., Genome Res. 22, 1282-1294 (2012)'	tbx-9'	CD20080221_tbx-9_8.csv'	205	Promoter Fusion'	/'
J.I. Murray et al., Genome Res. 22, 1282-1294 (2012)'	tbx-11'	CD20071105_tbx-11_8.csv'	220	Promoter Fusion'	/'
J.I. Murray et al., Genome Res. 22, 1282-1294 (2012)'	tbx-11'	CD20071119_tbx-11_10.csv'	220	Promoter Fusion'	/'
J.I. Murray et al., Genome Res. 22, 1282-1294 (2012)'	tbx-11'	CD20090701_tbx-11_RW10249_L1.csv'	145	Promoter Fusion'	/'
J.I. Murray et al., Genome Res. 22, 1282-1294 (2012)'	tbx-11'	CD20090701_tbx-11_RW10249_L2.csv'	140	Promoter Fusion'	/'
J.I. Murray et al., Genome Res. 22, 1282-1294 (2012)'	tbx-35'	CD20080116_tbx-35_2x6.csv'	240	Promoter Fusion'	/'
J.I. Murray et al., Genome Res. 22, 1282-1294 (2012)'	tbx-35'	CD20080224_tbx-35_6.csv'	200	Promoter Fusion'	/'
J.I. Murray et al., Genome Res. 22, 1282-1294 (2012)'	tbx-37'	CD20080912_tbx-37_b12_L1.csv'	160	Promoter Fusion'	/'
J.I. Murray et al., Genome Res. 22, 1282-1294 (2012)'	tbx-37'	CD20080912_tbx-37_b12_L2.csv'	150	Promoter Fusion'	/'
J.I. Murray et al., Genome Res. 22, 1282-1294 (2012)'	tbx-38'	CD20070803_tbx-38_9.csv'	195	Promoter Fusion'	/'
J.I. Murray et al., Genome Res. 22, 1282-1294 (2012)'	tbx-38'	CD20071031_tbx-38_3.csv'	155	Promoter Fusion'	/'
J.I. Murray et al., Genome Res. 22, 1282-1294 (2012)'	tbx-38'	CD20071106_tbx-38_3.csv'	180	Promoter Fusion'	/'
J.I. Murray et al., Genome Res. 22, 1282-1294 (2012)'	tlp-1'	CD20080829_T23G4_1_1_L1.csv'	140	Promoter Fusion'	/'
J.I. Murray et al., Genome Res. 22, 1282-1294 (2012)'	tlp-1'	CD20080829_T23G4_1_1_L2.csv'	150	Promoter Fusion'	/'
J.I. Murray et al., Genome Res. 22, 1282-1294 (2012)'	tlp-1'	CD20090409_tlp-1_RW10609_L1.csv'	150	Promoter Fusion'	/'
J.I. Murray et al., Genome Res. 22, 1282-1294 (2012)'	ttx-3'	CD20080916_ttx-3_8G1_14_L1.csv'	200	Protein Fusion'	/'
J.I. Murray et al., Genome Res. 22, 1282-1294 (2012)'	unc-130'	CD20089219_unc-130_9E1_8_L2.csv'	160	Protein Fusion'	/'
J.I. Murray et al., Genome Res. 22, 1282-1294 (2012)'	unc-130'	CD20091119_unc-130_9E1_4_L1.csv'	185	Protein Fusion'	/'
J.I. Murray et al., Genome Res. 22, 1282-1294 (2012)'	vab-7'	CD20070725_vab-7_6.csv'	190	Promoter Fusion'	/'
J.I. Murray et al., Genome Res. 22, 1282-1294 (2012)'	vab-7'	CD20070802_vab-7_xl1.csv'	225	Promoter Fusion'	/'
J.I. Murray et al., Genome Res. 22, 1282-1294 (2012)'	zip-8'	CD20080924_F23F12_9_3_L1.csv'	130	Promoter Fusion'	/'
J.I. Murray et al., Genome Res. 22, 1282-1294 (2012)'	dyf-7'	CD030906_dyf7red.csv'	220	Promoter Fusion'	/'
J.I. Murray et al., Genome Res. 22, 1282-1294 (2012)'	dyf-7'	CD20060506_dyf7pJIM20.csv'	250	Promoter Fusion'	/'
J.I. Murray et al., Genome Res. 22, 1282-1294 (2012)'	mir-57'	CD20060516_mi57.csv'	275	Promoter Fusion'	/'
J.I. Murray et al., Genome Res. 22, 1282-1294 (2012)'	mir-57'	CD20060516_mir_57.csv'	266	Promoter Fusion'	/'
J.I. Murray et al., Genome Res. 22, 1282-1294 (2012)'	mir-61'	CD20060915_mir61_e16.csv'	325	Promoter Fusion'	/'
J.I. Murray et al., Genome Res. 22, 1282-1294 (2012)'	ges-1'	CD20070110_Ges1-4.csv'	250	Promoter Fusion'	/'
J.I. Murray et al., Genome Res. 22, 1282-1294 (2012)'	ges-1'	CD20070219_Ges1-4.csv'	275	Promoter Fusion'	/'
J.I. Murray et al., Genome Res. 22, 1282-1294 (2012)'	eef-1a.1'	CD20070308_eft3.csv'	200	Promoter Fusion'	/'
J.I. Murray et al., Genome Res. 22, 1282-1294 (2012)'	hsp-3'	CD20070314_hsp3_a1a.csv'	215	Promoter Fusion'	/'
J.I. Murray et al., Genome Res. 22, 1282-1294 (2012)'	his-72'	CD20070403_his72_D1A.csv'	200	Promoter Fusion'	/'
J.I. Murray et al., Genome Res. 22, 1282-1294 (2012)'	cwn-1'	CD20070716_cwn-1_5.csv'	210	Promoter Fusion'	/'
J.I. Murray et al., Genome Res. 22, 1282-1294 (2012)'	egl-27.b'	CD20070722_egl-27_b.csv'	185	Promoter Fusion'	/'
J.I. Murray et al., Genome Res. 22, 1282-1294 (2012)'	egl-27.b'	CD20070818_egl-27_b.csv'	150	Promoter Fusion'	/'
J.I. Murray et al., Genome Res. 22, 1282-1294 (2012)'	egl-27.b'	CD20090415_egl-27b_1_L1.csv'	150	Promoter Fusion'	/'
J.I. Murray et al., Genome Res. 22, 1282-1294 (2012)'	hlh-26'	CD20070805_hlh-26_9.csv'	240	Promoter Fusion'	/'
J.I. Murray et al., Genome Res. 22, 1282-1294 (2012)'	hlh-26'	CD20090723_hlh26_1_L2.csv'	145	Promoter Fusion'	/'
J.I. Murray et al., Genome Res. 22, 1282-1294 (2012)'	dpy-7'	CD20070806_dpy-7_1.csv'	190	Promoter Fusion'	/'
J.I. Murray et al., Genome Res. 22, 1282-1294 (2012)'	die-1'	CD20070915_die-1_3.csv'	175	Promoter Fusion'	/'
J.I. Murray et al., Genome Res. 22, 1282-1294 (2012)'	die-1'	CD20080220_die-1_3e4_10.csv'	190	Protein Fusion'	/'
J.I. Murray et al., Genome Res. 22, 1282-1294 (2012)'	die-1'	CD20080802_die-1_sd1566.csv'	250	Protein Fusion'	/'
J.I. Murray et al., Genome Res. 22, 1282-1294 (2012)'	nhr-2'	CD20071011_nhr-2_1.csv'	215	Promoter Fusion'	/'
J.I. Murray et al., Genome Res. 22, 1282-1294 (2012)'	nhr-2'	CD20090330_nhr-2_9F1_10.csv'	160	Protein Fusion'	/'
J.I. Murray et al., Genome Res. 22, 1282-1294 (2012)'	nhr-2'	CD20090413_nhr-2_9F1_10_L1.csv'	115	Protein Fusion'	/'
J.I. Murray et al., Genome Res. 22, 1282-1294 (2012)'	pgp-3'	CD20071106_pgp-3_1.csv'	220	Promoter Fusion'	/'
J.I. Murray et al., Genome Res. 22, 1282-1294 (2012)'	sdz-28'	CD20080216_sdz-28_6.csv'	205	Promoter Fusion'	/'
J.I. Murray et al., Genome Res. 22, 1282-1294 (2012)'	sdz-28'	CD20080219_sdz-28_4.csv'	190	Promoter Fusion'	/'
J.I. Murray et al., Genome Res. 22, 1282-1294 (2012)'	c50f7.5'	CD20080305_c50f7_5_7.csv'	195	Promoter Fusion'	/'
J.I. Murray et al., Genome Res. 22, 1282-1294 (2012)'	ama-1'	CD20080412_ama-1_3A3_5.csv'	155	Protein Fusion'	/'
J.I. Murray et al., Genome Res. 22, 1282-1294 (2012)'	dsl-1'	CD20080501_dsl-1_5.csv'	220	Promoter Fusion'	/'
J.I. Murray et al., Genome Res. 22, 1282-1294 (2012)'	ztf-12'	CD20080504_C01B7_1_6.csv'	235	Promoter Fusion'	/'
J.I. Murray et al., Genome Res. 22, 1282-1294 (2012)'	nhr-79'	CD20080807_nhr-79_1_L1.csv'	135	Promoter Fusion'	/'
J.I. Murray et al., Genome Res. 22, 1282-1294 (2012)'	nhr-79'	CD20081020_nhr-79_3_L2.csv'	165	Promoter Fusion'	/'
J.I. Murray et al., Genome Res. 22, 1282-1294 (2012)'	nhr-57'	CD20080809_nhr-57_9_L1.csv'	135	Promoter Fusion'	/'
J.I. Murray et al., Genome Res. 22, 1282-1294 (2012)'	nhr-57'	CD20081106_nhr-57_5_L1.csv'	150	Promoter Fusion'	/'
J.I. Murray et al., Genome Res. 22, 1282-1294 (2012)'	nhr-57'	CD20090406_nhr-57_8_L1.csv'	135	Promoter Fusion'	/'
J.I. Murray et al., Genome Res. 22, 1282-1294 (2012)'	madf-10'	CD20080811_Y106G6H_4_9_L2.csv'	145	Promoter Fusion'	/'
J.I. Murray et al., Genome Res. 22, 1282-1294 (2012)'	hlh-16'	CD20080812_hlh-16_12_L1.csv'	145	Promoter Fusion'	/'
J.I. Murray et al., Genome Res. 22, 1282-1294 (2012)'	cdc-5l'	CD20080819_D1081_8_L1.csv'	154	Promoter Fusion'	/'
J.I. Murray et al., Genome Res. 22, 1282-1294 (2012)'	cdc-5l'	CD20080819_D1081_8_L2.csv'	140	Promoter Fusion'	/'
J.I. Murray et al., Genome Res. 22, 1282-1294 (2012)'	nhr-171'	CD20080819_nhr-171_16_L2.csv'	200	Promoter Fusion'	/'
J.I. Murray et al., Genome Res. 22, 1282-1294 (2012)'	nhr-171'	CD20081104_nhr-171_17_L1.csv'	135	Promoter Fusion'	/'
J.I. Murray et al., Genome Res. 22, 1282-1294 (2012)'	skr-8'	CD20080821_skr-8_1_L1.csv'	130	Promoter Fusion'	/'
J.I. Murray et al., Genome Res. 22, 1282-1294 (2012)'	f38c2.7'	CD20080828_F38C2_7_12_L2.csv'	105	Promoter Fusion'	/'
J.I. Murray et al., Genome Res. 22, 1282-1294 (2012)'	b0310.2'	CD20080905_B0310_2_13_L1.csv'	150	Promoter Fusion'	/'
J.I. Murray et al., Genome Res. 22, 1282-1294 (2012)'	b0310.2'	CD20080911_B0310_2_2_L1.csv'	150	Promoter Fusion'	/'
J.I. Murray et al., Genome Res. 22, 1282-1294 (2012)'	b0310.2'	CD20081111_B0310_2_8_L1.csv'	150	Promoter Fusion'	/'
J.I. Murray et al., Genome Res. 22, 1282-1294 (2012)'	b0310.2'	CD20081111_B0310_2_8_L2.csv'	140	Promoter Fusion'	/'
J.I. Murray et al., Genome Res. 22, 1282-1294 (2012)'	f21d5.9'	CD20080909_F21D5_9_5_L1.csv'	170	Promoter Fusion'	/'
J.I. Murray et al., Genome Res. 22, 1282-1294 (2012)'	f21d5.9'	CD20090310_F21D5_9_1_L1.csv'	170	Promoter Fusion'	/'
J.I. Murray et al., Genome Res. 22, 1282-1294 (2012)'	f21d5.9'	CD20090428_F21D5_9_9_L2.csv'	160	Promoter Fusion'	/'
J.I. Murray et al., Genome Res. 22, 1282-1294 (2012)'	saeg-2'	CD20080909_T23G5_6_15_L1.csv'	145	Promoter Fusion'	/'
J.I. Murray et al., Genome Res. 22, 1282-1294 (2012)'	saeg-2'	CD20080909_T23G5_6_15_L2.csv'	130	Promoter Fusion'	/'
J.I. Murray et al., Genome Res. 22, 1282-1294 (2012)'	ceh-21'	CD20080914_ceh-21_6_L2.csv'	140	Promoter Fusion'	/'
J.I. Murray et al., Genome Res. 22, 1282-1294 (2012)'	ceh-21'	CD20081023_ceh-21_5_L1.csv'	190	Promoter Fusion'	/'
J.I. Murray et al., Genome Res. 22, 1282-1294 (2012)'	zk185.1'	CD20080925_ZK185_1_3_L1.csv'	135	Promoter Fusion'	/'
J.I. Murray et al., Genome Res. 22, 1282-1294 (2012)'	aptf-4'	CD20081002_F28C6_1_2_L1.csv'	145	Promoter Fusion'	/'
J.I. Murray et al., Genome Res. 22, 1282-1294 (2012)'	aptf-4'	CD20081016_F28C6_1_10_L2.csv'	140	Promoter Fusion'	/'
J.I. Murray et al., Genome Res. 22, 1282-1294 (2012)'	moe-3'	CD20081002_moe-3_8_L1.csv'	150	Promoter Fusion'	/'
J.I. Murray et al., Genome Res. 22, 1282-1294 (2012)'	sma-9'	CD20081003_sma-9k_1_L2.csv'	160	Promoter Fusion'	/'
J.I. Murray et al., Genome Res. 22, 1282-1294 (2012)'	rad-26'	CD20081006_rad-26_6_L2.csv'	140	Promoter Fusion'	/'
J.I. Murray et al., Genome Res. 22, 1282-1294 (2012)'	lsy-27'	CD20081007_F47H4_1_14_L1.csv'	150	Promoter Fusion'	/'
J.I. Murray et al., Genome Res. 22, 1282-1294 (2012)'	lsy-27'	CD20081007_F47H4_1_14_L2.csv'	150	Promoter Fusion'	/'
J.I. Murray et al., Genome Res. 22, 1282-1294 (2012)'	nhr-68'	CD20081007_nhr-68_14_L1.csv'	155	Promoter Fusion'	/'
J.I. Murray et al., Genome Res. 22, 1282-1294 (2012)'	nhr-68'	CD20090312_nhr-68_13_L2.csv'	155	Promoter Fusion'	/'
J.I. Murray et al., Genome Res. 22, 1282-1294 (2012)'	dhhc-10'	CD20081024_K02G10_1_4_L1.csv'	155	Promoter Fusion'	/'
J.I. Murray et al., Genome Res. 22, 1282-1294 (2012)'	mnm-2'	CD20081024_mnm-2_7_L1.csv'	110	Promoter Fusion'	/'
J.I. Murray et al., Genome Res. 22, 1282-1294 (2012)'	nhr-69'	CD20081028_T23H4_2_10_L1.csv'	160	Promoter Fusion'	/'
J.I. Murray et al., Genome Res. 22, 1282-1294 (2012)'	nhr-69'	CD20090428_T23H4_2_2_L1.csv'	145	Promoter Fusion'	/'
J.I. Murray et al., Genome Res. 22, 1282-1294 (2012)'	sdc-2'	CD20081029_sdc-2_3_L1.csv'	130	Promoter Fusion'	/'
J.I. Murray et al., Genome Res. 22, 1282-1294 (2012)'	myrf-2'	CD20081030_F21A10_2a_10_L1.csv'	170	Promoter Fusion'	/'
J.I. Murray et al., Genome Res. 22, 1282-1294 (2012)'	myrf-2'	CD20090430_F21A10_2_9_L1.csv'	160	Promoter Fusion'	/'
J.I. Murray et al., Genome Res. 22, 1282-1294 (2012)'	mab-5'	CD20081031_mab-5_3F4_10_L1.csv'	170	Protein Fusion'	/'
J.I. Murray et al., Genome Res. 22, 1282-1294 (2012)'	mab-5'	CD20081114_mab-5_3F4_10_L2.csv'	185	Protein Fusion'	/'
J.I. Murray et al., Genome Res. 22, 1282-1294 (2012)'	t22c8.3'	CD20081105_T22C8_3_1_L2.csv'	135	Promoter Fusion'	/'
J.I. Murray et al., Genome Res. 22, 1282-1294 (2012)'	t22c8.3'	CD20091118_T22C8_3_11_L1.csv'	140	Promoter Fusion'	/'
J.I. Murray et al., Genome Res. 22, 1282-1294 (2012)'	hmg-1.2'	CD20090309_F39B2_1_7_L1.csv'	135	Promoter Fusion'	/'
J.I. Murray et al., Genome Res. 22, 1282-1294 (2012)'	f16b12.6'	CD20090331_F16B12_6_1_L1.csv'	125	Promoter Fusion'	/'
J.I. Murray et al., Genome Res. 22, 1282-1294 (2012)'	f16b12.6'	CD20090514_F16B12_6_2_L1.csv'	150	Promoter Fusion'	/'
J.I. Murray et al., Genome Res. 22, 1282-1294 (2012)'	c25d7.10'	CD20090401_C25D7_10_1_L2.csv'	200	Promoter Fusion'	/'
J.I. Murray et al., Genome Res. 22, 1282-1294 (2012)'	egl-27.c'	CD20090414_egl-27c_L1.csv'	110	Promoter Fusion'	/'
J.I. Murray et al., Genome Res. 22, 1282-1294 (2012)'	rbm-26'	CD20090505_B0336_3_13_L1.csv'	200	Promoter Fusion'	/'
J.I. Murray et al., Genome Res. 22, 1282-1294 (2012)'	isw-1'	CD20090511_isw-1_3_L1.csv'	160	Promoter Fusion'	/'
J.I. Murray et al., Genome Res. 22, 1282-1294 (2012)'	r144.3'	CD20090513_R144_3_3_RW10881_L1.csv'	160	Promoter Fusion'	/'
J.I. Murray et al., Genome Res. 22, 1282-1294 (2012)'	r144.3'	CD20090608_R144_3_12_L1.csv'	170	Promoter Fusion'	/'
J.I. Murray et al., Genome Res. 22, 1282-1294 (2012)'	r144.3'	CD20090608_R144_3_12_L2.csv'	150	Promoter Fusion'	/'
J.I. Murray et al., Genome Res. 22, 1282-1294 (2012)'	nfyb-1'	CD20090513_W10D9_4_4_L1.csv'	145	Promoter Fusion'	/'
J.I. Murray et al., Genome Res. 22, 1282-1294 (2012)'	nfyb-1'	CD20090513_W10D9_4_4_L2.csv'	145	Promoter Fusion'	/'
J.I. Murray et al., Genome Res. 22, 1282-1294 (2012)'	ceh-26'	CD20090518_ceh-26_10b1_3_L1.csv'	150	Protein Fusion'	/'
J.I. Murray et al., Genome Res. 22, 1282-1294 (2012)'	attf-2'	CD20090519_F09G2_9_6_L1.csv'	165	Promoter Fusion'	/'
J.I. Murray et al., Genome Res. 22, 1282-1294 (2012)'	attf-2'	CD20090804_F09G2_9_1_L1.csv'	150	Promoter Fusion'	/'
J.I. Murray et al., Genome Res. 22, 1282-1294 (2012)'	lgmn-1'	CD20090629_T28H10_3_4_L1.csv'	200	Promoter Fusion'	/'
J.I. Murray et al., Genome Res. 22, 1282-1294 (2012)'	lgmn-1'	CD20090629_T28H10_3_4_L2.csv'	190	Promoter Fusion'	/'
J.I. Murray et al., Genome Res. 22, 1282-1294 (2012)'	cep-1.b'	CD20090706_cep-1_b_1_L1.csv'	150	Promoter Fusion'	/'
J.I. Murray et al., Genome Res. 22, 1282-1294 (2012)'	tps-2'	CD20090804_tps-2_2_L1.csv'	130	Promoter Fusion'	/'
J.I. Murray et al., Genome Res. 22, 1282-1294 (2012)'	tps-2'	CD20090807_tps-2_12_L1.csv'	145	Promoter Fusion'	/'
J.I. Murray et al., Genome Res. 22, 1282-1294 (2012)'	gadr-1'	CD20090806_F58D2_1_2_L1.csv'	150	Promoter Fusion'	/'
J.I. Murray et al., Genome Res. 22, 1282-1294 (2012)'	hmg-11'	CD20090810_hmg-11_7_L1.csv'	145	Promoter Fusion'	/'
J.I. Murray et al., Genome Res. 22, 1282-1294 (2012)'	attf-4'	CD20090812_C05D10_1b_3_L1.csv'	155	Promoter Fusion'	/'
J.I. Murray et al., Genome Res. 22, 1282-1294 (2012)'	dpy-31'	CD20091023_dpy-31_3_L2.csv'	190	Promoter Fusion'	/'
J.I. Murray et al., Genome Res. 22, 1282-1294 (2012)'	mel-28'	CD20091113_mel-28_2_L1.csv'	135	Promoter Fusion'	/'
J.I. Murray et al., Genome Res. 22, 1282-1294 (2012)'	f17c11.1'	CD20091116_F17C11_5_12_L1.csv'	135	Promoter Fusion'	/'
J.I. Murray et al., Genome Res. 22, 1282-1294 (2012)'	pbrm-1'	CD20091117_tag-185_b_6_L1.csv'	145	Promoter Fusion'	/'
J.I. Murray et al., Genome Res. 22, 1282-1294 (2012)'	lir-2'	CD20091119_lir-2_OP175_L1.csv'	105	Protein Fusion'	/'
J.I. Murray et al., Genome Res. 22, 1282-1294 (2012)'	pgp-2'	CD20091127_pgp-2_5_L2.csv'	140	Promoter Fusion'	/'
J.S. Packer et al., Science 365, eaax1971 (2019)'	nhr-25'	CD20080605_nhr-25_h4_8_L2.csv'	139	Protein Fusion'	/'
J.S. Packer et al., Science 365, eaax1971 (2019)'	hlh-1'	CD20080606_hlh-1_6B4_4_L1.csv'	115	Protein Fusion'	/'
J.S. Packer et al., Science 365, eaax1971 (2019)'	aha-1'	CD20120925_aha-1_2_L1.csv'	180	Protein Fusion'	/'
J.S. Packer et al., Science 365, eaax1971 (2019)'	aha-1'	CD20120925_aha-1_2_L2.csv'	180	Protein Fusion'	/'
J.S. Packer et al., Science 365, eaax1971 (2019)'	aly-1'	CD20121128_aly-1_11_L1.csv'	135	Protein Fusion'	/'
J.S. Packer et al., Science 365, eaax1971 (2019)'	aly-1'	CD20121128_aly-1_11_L2.csv'	147	Protein Fusion'	/'
J.S. Packer et al., Science 365, eaax1971 (2019)'	aly-1'	CD20131017_aly-1_18_L1.csv'	131	Protein Fusion'	/'
J.S. Packer et al., Science 365, eaax1971 (2019)'	aly-1'	CD20131017_aly-1_18_L2.csv'	135	Protein Fusion'	/'
J.S. Packer et al., Science 365, eaax1971 (2019)'	ceh-6'	CD20120331_RW10871_L3.csv'	200	Protein Fusion'	/'
J.S. Packer et al., Science 365, eaax1971 (2019)'	ceh-13'	CD20120305_ceh-13_L1.csv'	160	Protein Fusion'	/'
J.S. Packer et al., Science 365, eaax1971 (2019)'	ceh-13'	CD20120305_ceh-13_L2.csv'	190	Protein Fusion'	/'
J.S. Packer et al., Science 365, eaax1971 (2019)'	ceh-14'	CD20140411_ceh-14_17_L1.csv'	155	Promoter Fusion'	/'
J.S. Packer et al., Science 365, eaax1971 (2019)'	ceh-16'	CD20081013_ceh-16_b7_L2.csv'	143	Promoter Fusion'	/'
J.S. Packer et al., Science 365, eaax1971 (2019)'	ceh-16'	CD20111102_ceh-16_11_L1.csv'	188	Promoter Fusion'	/'
J.S. Packer et al., Science 365, eaax1971 (2019)'	ceh-16'	CD20111102_ceh-16_11_L2.csv'	175	Promoter Fusion'	/'
J.S. Packer et al., Science 365, eaax1971 (2019)'	ceh-22'	CD20120507_ceh-22_12_L1.csv'	221	Protein Fusion'	/'
J.S. Packer et al., Science 365, eaax1971 (2019)'	ceh-22'	CD20130311_ceh-22_L3.csv'	240	Protein Fusion'	/'
J.S. Packer et al., Science 365, eaax1971 (2019)'	ceh-27'	CD20080709_ceh-27_1_L2.csv'	125	Promoter Fusion'	/'
J.S. Packer et al., Science 365, eaax1971 (2019)'	ceh-27'	CD20090407_ceh-27_RW10863_L1.csv'	138	Promoter Fusion'	/'
J.S. Packer et al., Science 365, eaax1971 (2019)'	ceh-27'	CD20090407_ceh-27_RW10863_L2.csv'	128	Promoter Fusion'	/'
J.S. Packer et al., Science 365, eaax1971 (2019)'	ceh-27'	CD20110310_ceh-27_5_L1.csv'	135	Promoter Fusion'	/'
J.S. Packer et al., Science 365, eaax1971 (2019)'	ceh-27'	CD20110310_ceh-27_5_L2.csv'	150	Promoter Fusion'	/'
J.S. Packer et al., Science 365, eaax1971 (2019)'	ceh-27'	CD20100707_ceh-27_OP139_L1.csv'	159	Protein Fusion'	/'
J.S. Packer et al., Science 365, eaax1971 (2019)'	ceh-27'	CD20100707_ceh-27_OP139_L2.csv'	153	Protein Fusion'	/'
J.S. Packer et al., Science 365, eaax1971 (2019)'	ceh-27'	CD20110113_ceh-27_OP135_L1.csv'	140	Protein Fusion'	/'
J.S. Packer et al., Science 365, eaax1971 (2019)'	ceh-27'	CD20110113_ceh-27_OP135_L2.csv'	137	Protein Fusion'	/'
J.S. Packer et al., Science 365, eaax1971 (2019)'	ceh-27'	CD20111017_ceh-27_L1.csv'	185	Protein Fusion'	/'
J.S. Packer et al., Science 365, eaax1971 (2019)'	ceh-27'	CD20141028_ceh-27_JIM290_L1.csv'	220	Protein Fusion'	/'
J.S. Packer et al., Science 365, eaax1971 (2019)'	ceh-31'	CD20121026_ceh-31_6_L1.csv'	190	Protein Fusion'	/'
J.S. Packer et al., Science 365, eaax1971 (2019)'	ceh-31'	CD20121026_ceh-31_6_L2.csv'	190	Protein Fusion'	/'
J.S. Packer et al., Science 365, eaax1971 (2019)'	ceh-32'	CD20090526_ceh-32_13_L1.csv'	156	Promoter Fusion'	/'
J.S. Packer et al., Science 365, eaax1971 (2019)'	ceh-32'	CD20090526_ceh-32_13_L2.csv'	155	Promoter Fusion'	/'
J.S. Packer et al., Science 365, eaax1971 (2019)'	ceh-32'	CD20140828_ceh-32_OP516_L1.csv'	220	Protein Fusion'	/'
J.S. Packer et al., Science 365, eaax1971 (2019)'	ceh-34'	CD20081013_ceh-34_4_L2.csv'	200	Promoter Fusion'	/'
J.S. Packer et al., Science 365, eaax1971 (2019)'	ceh-34'	CD20090312_ceh-34_13_L1.csv'	199	Promoter Fusion'	/'
J.S. Packer et al., Science 365, eaax1971 (2019)'	ceh-34'	CD20141112_ceh-34_OP524_L1.csv'	200	Protein Fusion'	/'
J.S. Packer et al., Science 365, eaax1971 (2019)'	ceh-36'	CD20080822_ceh-36b4_L2.csv'	131	Promoter Fusion'	/'
J.S. Packer et al., Science 365, eaax1971 (2019)'	ceh-36'	CD20081108_ceh-36_b13_L2.csv'	132	Promoter Fusion'	/'
J.S. Packer et al., Science 365, eaax1971 (2019)'	ceh-36'	CD20090409_ceh-36_RW10598_L2.csv'	140	Promoter Fusion'	/'
J.S. Packer et al., Science 365, eaax1971 (2019)'	ceh-39'	CD20080929_ceh-39_1_L1.csv'	161	Promoter Fusion'	/'
J.S. Packer et al., Science 365, eaax1971 (2019)'	ceh-39'	CD20110126_ceh-39_OP169_L1.csv'	141	Protein Fusion'	/'
J.S. Packer et al., Science 365, eaax1971 (2019)'	ceh-39'	CD20110126_ceh-39_OP169_L2.csv'	140	Protein Fusion'	/'
J.S. Packer et al., Science 365, eaax1971 (2019)'	ceh-40'	CD20111012_ceh-40_20_L2.csv'	141	Promoter Fusion'	/'
J.S. Packer et al., Science 365, eaax1971 (2019)'	ceh-41'	CD20080819_ceh-41_14_L2.csv'	190	Promoter Fusion'	/'
J.S. Packer et al., Science 365, eaax1971 (2019)'	ceh-43'	CD20090806_ceh-43_RW10154_L2.csv'	142	Promoter Fusion'	/'
J.S. Packer et al., Science 365, eaax1971 (2019)'	ceh-43'	CD20110929_ceh-43_L3.csv'	165	Protein Fusion'	/'
J.S. Packer et al., Science 365, eaax1971 (2019)'	ceh-43'	CD20110929_ceh-43_L4.csv'	160	Protein Fusion'	/'
J.S. Packer et al., Science 365, eaax1971 (2019)'	ceh-51'	CD20160304_ceh-51_L1.csv'	120	Protein Fusion'	/'
J.S. Packer et al., Science 365, eaax1971 (2019)'	cnd-1'	CD20110731_RW10434_L1.csv'	190	Promoter Fusion'	/'
J.S. Packer et al., Science 365, eaax1971 (2019)'	cnd-1'	CD20121203_cnd_1_20_L1.csv'	205	Protein Fusion'	/'
J.S. Packer et al., Science 365, eaax1971 (2019)'	crh-2'	CD20140218_crh-2_16_L1.csv'	180	Promoter Fusion'	/'
J.S. Packer et al., Science 365, eaax1971 (2019)'	crh-2'	CD20140218_crh-2_16_L2.csv'	180	Promoter Fusion'	/'
J.S. Packer et al., Science 365, eaax1971 (2019)'	crh-2'	CD20120904_C27D64_19_L1.csv'	160	Protein Fusion'	/'
J.S. Packer et al., Science 365, eaax1971 (2019)'	daf-3'	CD20111102_daf-3a_18_L2.csv'	135	Promoter Fusion'	/'
J.S. Packer et al., Science 365, eaax1971 (2019)'	daf-3'	CD20111207_daf-3a_2_L1.csv'	150	Promoter Fusion'	/'
J.S. Packer et al., Science 365, eaax1971 (2019)'	daf-19'	CD20100419_daf-19_2_L2.csv'	200	Promoter Fusion'	/'
J.S. Packer et al., Science 365, eaax1971 (2019)'	daf-19'	CD20100916_daf-19_2_L1.csv'	201	Promoter Fusion'	/'
J.S. Packer et al., Science 365, eaax1971 (2019)'	daf-19'	CD20120420_daf-19a_17_L1.csv'	145	Promoter Fusion'	/'
J.S. Packer et al., Science 365, eaax1971 (2019)'	daf-19'	CD20120420_daf-19a_17_L2.csv'	150	Promoter Fusion'	/'
J.S. Packer et al., Science 365, eaax1971 (2019)'	dmd-4'	CD20080915_dmd-4_9_L1.csv'	128	Promoter Fusion'	/'
J.S. Packer et al., Science 365, eaax1971 (2019)'	dmd-4'	CD20080915_dmd-4_9_L2.csv'	152	Promoter Fusion'	/'
J.S. Packer et al., Science 365, eaax1971 (2019)'	dmd-4'	CD20081014_dmd-4_1_L2.csv'	181	Promoter Fusion'	/'
J.S. Packer et al., Science 365, eaax1971 (2019)'	dpff-1'	CD20120202_C28H89a_5_L1.csv'	132	Promoter Fusion'	/'
J.S. Packer et al., Science 365, eaax1971 (2019)'	dpff-1'	CD20120523_C28H89a_14_L2.csv'	136	Promoter Fusion'	/'
J.S. Packer et al., Science 365, eaax1971 (2019)'	dsc-1'	CD20150317_dsc-1_OP522_L1.csv'	220	Protein Fusion'	/'
J.S. Packer et al., Science 365, eaax1971 (2019)'	dve-1'	CD20080905_dve-1_15_L2.csv'	160	Promoter Fusion'	/'
J.S. Packer et al., Science 365, eaax1971 (2019)'	dve-1'	CD20141021_dve-1_RW10611_L2.csv'	220	Promoter Fusion'	/'
J.S. Packer et al., Science 365, eaax1971 (2019)'	dve-1'	CD20130605_dve-1_3_L2.csv'	220	Protein Fusion'	/'
J.S. Packer et al., Science 365, eaax1971 (2019)'	efl-3'	CD20110411_F49E126_3_L1.csv'	180	Protein Fusion'	/'
J.S. Packer et al., Science 365, eaax1971 (2019)'	egl-18'	CD20100505_egl-18b_2_L1.csv'	158	Promoter Fusion'	/'
J.S. Packer et al., Science 365, eaax1971 (2019)'	egl-18'	CD20100505_egl-18b_2_L2.csv'	155	Promoter Fusion'	/'
J.S. Packer et al., Science 365, eaax1971 (2019)'	egl-18'	CD20140106_egl-18_SD1434_L1.csv'	127	Promoter Fusion'	/'
J.S. Packer et al., Science 365, eaax1971 (2019)'	egl-38'	CD20130522_egl-38_OP171_L1.csv'	230	Protein Fusion'	/'
J.S. Packer et al., Science 365, eaax1971 (2019)'	elt-1'	CD20101111_elt-1_3_L1.csv'	170	Promoter Fusion'	/'
J.S. Packer et al., Science 365, eaax1971 (2019)'	elt-1'	CD20101111_elt-1_3_L2.csv'	151	Promoter Fusion'	/'
J.S. Packer et al., Science 365, eaax1971 (2019)'	elt-1'	CD20120130_elt-1_17_L1.csv'	160	Protein Fusion'	/'
J.S. Packer et al., Science 365, eaax1971 (2019)'	elt-1'	CD20120130_elt-1_17_L2.csv'	160	Protein Fusion'	/'
J.S. Packer et al., Science 365, eaax1971 (2019)'	elt-3'	CD20140509_elt-3_JG5_L2.csv'	220	Promoter Fusion'	/'
J.S. Packer et al., Science 365, eaax1971 (2019)'	elt-3'	CD20140401_elt-3_HS1673_L2.csv'	190	Protein Fusion'	/'
J.S. Packer et al., Science 365, eaax1971 (2019)'	end-3'	CD20060718_end3_2.csv'	170	Promoter Fusion'	/'
J.S. Packer et al., Science 365, eaax1971 (2019)'	eor-1'	CD20100414_eor-1_6_L1.csv'	144	Promoter Fusion'	/'
J.S. Packer et al., Science 365, eaax1971 (2019)'	eor-1'	CD20100423_eor-1_9_L2.csv'	143	Promoter Fusion'	/'
J.S. Packer et al., Science 365, eaax1971 (2019)'	ets-7'	CD20131009_F19F105_15_L1.csv'	180	Protein Fusion'	/'
J.S. Packer et al., Science 365, eaax1971 (2019)'	ets-7'	CD20141028_ets-7_OP487_L1.csv'	180	Protein Fusion'	/'
J.S. Packer et al., Science 365, eaax1971 (2019)'	ets-7'	CD20141028_ets-7_OP487_L2.csv'	180	Protein Fusion'	/'
J.S. Packer et al., Science 365, eaax1971 (2019)'	eyg-1'	CD20120829_Y53C12C1_10.csv'	185	Protein Fusion'	/'
J.S. Packer et al., Science 365, eaax1971 (2019)'	eyg-1'	CD20130304_Y53C12C1_13_L1.csv'	200	Protein Fusion'	/'
J.S. Packer et al., Science 365, eaax1971 (2019)'	eyg-1'	CD20130304_Y53C12C1_13_L2.csv'	200	Protein Fusion'	/'
J.S. Packer et al., Science 365, eaax1971 (2019)'	f23b12.7'	CD20121009_F23B127_19_L2.csv'	190	Protein Fusion'	/'
J.S. Packer et al., Science 365, eaax1971 (2019)'	fkh-4'	CD20120126_fkh-4_7_L1.csv'	158	Protein Fusion'	/'
J.S. Packer et al., Science 365, eaax1971 (2019)'	fkh-4'	CD20120126_fkh-4_7_L2.csv'	157	Protein Fusion'	/'
J.S. Packer et al., Science 365, eaax1971 (2019)'	ham-2'	CD20180622_ham-2_RW12054_L2.csv'	210	Protein Fusion'	/'
J.S. Packer et al., Science 365, eaax1971 (2019)'	hlh-2'	CD20130109_hlh-2_16_L2.csv'	145	Promoter Fusion'	/'
J.S. Packer et al., Science 365, eaax1971 (2019)'	hlh-3'	CD20160301_hlh-3_OP650_L2.csv'	195	Protein Fusion'	/'
J.S. Packer et al., Science 365, eaax1971 (2019)'	hlh-3'	CD20120605_hlh-3_L1.csv'	215	Protein Fusion'	/'
J.S. Packer et al., Science 365, eaax1971 (2019)'	hlh-4'	CD20141203_hlh-4_OP523_L1.csv'	210	Protein Fusion'	/'
J.S. Packer et al., Science 365, eaax1971 (2019)'	hlh-8'	CD20140507_hlh-8_16_L2.csv'	220	Promoter Fusion'	/'
J.S. Packer et al., Science 365, eaax1971 (2019)'	hlh-17'	CD20140618_hlh-17_XA6400_L2.csv'	220	Promoter Fusion'	/'
J.S. Packer et al., Science 365, eaax1971 (2019)'	hlh-30'	CD20150213_hlh-30_XIL095_L2.csv'	200	Protein Fusion'	/'
J.S. Packer et al., Science 365, eaax1971 (2019)'	irx-1'	CD20090531_irx-1_b1_L2.csv'	200	Promoter Fusion'	/'
J.S. Packer et al., Science 365, eaax1971 (2019)'	k09a11.1'	CD20120125_K09A111_17_L1.csv'	161	Promoter Fusion'	/'
J.S. Packer et al., Science 365, eaax1971 (2019)'	k09a11.1'	CD20120125_K09A111_17_L2.csv'	152	Promoter Fusion'	/'
J.S. Packer et al., Science 365, eaax1971 (2019)'	k09a11.1'	CD20111221_K09A111_3_L2.csv'	170	Protein Fusion'	/'
J.S. Packer et al., Science 365, eaax1971 (2019)'	lag-1'	CD20091216lag-1_L1.csv'	135	Promoter Fusion'	/'
J.S. Packer et al., Science 365, eaax1971 (2019)'	let-381'	CD20130219_let-381_2_L2.csv'	151	Protein Fusion'	/'
J.S. Packer et al., Science 365, eaax1971 (2019)'	lim-4'	CD20140731_lim-4_XIL023_L1.csv'	200	Protein Fusion'	/'
J.S. Packer et al., Science 365, eaax1971 (2019)'	lim-6'	CD20121015_lim-6_10_L2.csv'	207	Protein Fusion'	/'
J.S. Packer et al., Science 365, eaax1971 (2019)'	lin-11'	CD20101029_lin-11_11_L1.csv'	140	Protein Fusion'	/'
J.S. Packer et al., Science 365, eaax1971 (2019)'	lin-11'	CD20101029_lin-11_11_L2.csv'	190	Protein Fusion'	/'
J.S. Packer et al., Science 365, eaax1971 (2019)'	lin-15b'	CD20101101_lin-15B_OP184_L1.csv'	200	Protein Fusion'	/'
J.S. Packer et al., Science 365, eaax1971 (2019)'	lin-15b'	CD20101101_lin-15B_OP184_L2.csv'	140	Protein Fusion'	/'
J.S. Packer et al., Science 365, eaax1971 (2019)'	lin-26'	CD20080805_lin-26_5_L1.csv'	131	Promoter Fusion'	/'
J.S. Packer et al., Science 365, eaax1971 (2019)'	lin-26'	CD20080805_lin-26_5_L2.csv'	131	Promoter Fusion'	/'
J.S. Packer et al., Science 365, eaax1971 (2019)'	lin-26'	CD20080812_lin-26_1_L2_CELTD_1.csv'	124	Promoter Fusion'	/'
J.S. Packer et al., Science 365, eaax1971 (2019)'	lin-26'	CD20130712_lin-26_L1.csv'	220	Protein Fusion'	/'
J.S. Packer et al., Science 365, eaax1971 (2019)'	lin-32'	CD20080923_lin-32_1_L2.csv'	115	Promoter Fusion'	/'
J.S. Packer et al., Science 365, eaax1971 (2019)'	lin-32'	CD20090501_lin-32_5_L1.csv'	160	Promoter Fusion'	/'
J.S. Packer et al., Science 365, eaax1971 (2019)'	lin-39'	CD20110301_lin-39_9_L1.csv'	125	Promoter Fusion'	/'
J.S. Packer et al., Science 365, eaax1971 (2019)'	lin-39'	CD20110301_lin-39_9_L2.csv'	135	Promoter Fusion'	/'
J.S. Packer et al., Science 365, eaax1971 (2019)'	lin-39'	CD20170501_lin-39_GFP_L1.csv'	235	Protein Fusion'	/'
J.S. Packer et al., Science 365, eaax1971 (2019)'	lsy-2'	CD20111123_lsy-2_16_L1.csv'	125	Protein Fusion'	/'
J.S. Packer et al., Science 365, eaax1971 (2019)'	mep-1'	CD20110923_mep-1_5_L2.csv'	125	Promoter Fusion'	/'
J.S. Packer et al., Science 365, eaax1971 (2019)'	mep-1'	CD20100719_mep-1_B2_L1.csv'	147	Protein Fusion'	/'
J.S. Packer et al., Science 365, eaax1971 (2019)'	mep-1'	CD20100719_mep-1_B2_L2.csv'	138	Protein Fusion'	/'
J.S. Packer et al., Science 365, eaax1971 (2019)'	mep-1'	CD20110413_mep-1_11_L1.csv'	135	Protein Fusion'	/'
J.S. Packer et al., Science 365, eaax1971 (2019)'	mep-1'	CD20130517_mep-1_19_L1.csv'	140	Protein Fusion'	/'
J.S. Packer et al., Science 365, eaax1971 (2019)'	nfya-1'	CD20100802_tag-295_B_L1.csv'	141	Promoter Fusion'	/'
J.S. Packer et al., Science 365, eaax1971 (2019)'	nfya-1'	CD20121126_nfya-1_6_L1.csv'	130	Protein Fusion'	/'
J.S. Packer et al., Science 365, eaax1971 (2019)'	nfyc-1'	CD20130417_nfyc-1_3_L1.csv'	170	Promoter Fusion'	/'
J.S. Packer et al., Science 365, eaax1971 (2019)'	nfyc-1'	CD20130530_nfyc-1_17_L1.csv'	168	Promoter Fusion'	/'
J.S. Packer et al., Science 365, eaax1971 (2019)'	ngn-1'	CD20180827_113XMT19703_ngn-1-GFP_L1.csv'	140	Protein Fusion'	/'
J.S. Packer et al., Science 365, eaax1971 (2019)'	nhr-23'	CD200806025_nhr-23_gsIs269_L2.csv'	170	Protein Fusion'	/'
J.S. Packer et al., Science 365, eaax1971 (2019)'	nhr-49'	CD20090813_nhr-49b_5_L2.csv'	157	Promoter Fusion'	/'
J.S. Packer et al., Science 365, eaax1971 (2019)'	nhr-49'	CD20110127_nhr-49c_4_L2.csv'	133	Promoter Fusion'	/'
J.S. Packer et al., Science 365, eaax1971 (2019)'	nhr-67'	CD20111128_nhr-67_7_L1.csv'	163	Promoter Fusion'	/'
J.S. Packer et al., Science 365, eaax1971 (2019)'	nhr-67'	CD20111128_nhr-67_7_L2.csv'	167	Promoter Fusion'	/'
J.S. Packer et al., Science 365, eaax1971 (2019)'	nhr-67'	CD20130506_nhr-67_3_L2.csv'	174	Promoter Fusion'	/'
J.S. Packer et al., Science 365, eaax1971 (2019)'	nhr-67'	CD20120905_nhr-67_6_L1.csv'	150	Protein Fusion'	/'
J.S. Packer et al., Science 365, eaax1971 (2019)'	nhr-67'	CD20130527_nhr-67_JIM202_L2.csv'	238	Protein Fusion'	/'
J.S. Packer et al., Science 365, eaax1971 (2019)'	nhr-102'	CD20121016_nhr-102_19_L1.csv'	180	Protein Fusion'	/'
J.S. Packer et al., Science 365, eaax1971 (2019)'	nhr-102'	CD20121016_nhr-102_19_L2.csv'	180	Protein Fusion'	/'
J.S. Packer et al., Science 365, eaax1971 (2019)'	nhr-127'	CD20120608_nhr-127_B_L1.csv'	186	Protein Fusion'	/'
J.S. Packer et al., Science 365, eaax1971 (2019)'	nhr-127'	CD20120608_nhr-127_B_L2.csv'	186	Protein Fusion'	/'
J.S. Packer et al., Science 365, eaax1971 (2019)'	nhr-127'	CD20130108_nhr-127_11_L1.csv'	200	Protein Fusion'	/'
J.S. Packer et al., Science 365, eaax1971 (2019)'	nhr-232'	CD20130405_nhr-232_5_L2.csv'	140	Protein Fusion'	/'
J.S. Packer et al., Science 365, eaax1971 (2019)'	nob-1'	CD20090529_nob-1_b26_L2.csv'	200	Promoter Fusion'	/'
J.S. Packer et al., Science 365, eaax1971 (2019)'	nob-1'	CD20090605_nob-1_b26_L2.csv'	151	Promoter Fusion'	/'
J.S. Packer et al., Science 365, eaax1971 (2019)'	nob-1'	CD20111029_nob-1_L4.csv'	170	Protein Fusion'	/'
J.S. Packer et al., Science 365, eaax1971 (2019)'	nob-1'	CD20170523_nob-1_GFP_L1.csv'	200	Protein Fusion'	/'
J.S. Packer et al., Science 365, eaax1971 (2019)'	pal-1'	CD20101006_pal-1_3_L1.csv'	154	Promoter Fusion'	/'
J.S. Packer et al., Science 365, eaax1971 (2019)'	pal-1'	CD20101006_pal-1_3_L2.csv'	142	Promoter Fusion'	/'
J.S. Packer et al., Science 365, eaax1971 (2019)'	pal-1'	CD20090223_pal-1_7A2_4_L1.csv'	190	Protein Fusion'	/'
J.S. Packer et al., Science 365, eaax1971 (2019)'	pal-1'	CD20110425_pal-1_25C_L2.csv'	200	Protein Fusion'	/'
J.S. Packer et al., Science 365, eaax1971 (2019)'	pax-3'	CD20080925_pax-3_3_L2.csv'	151	Promoter Fusion'	/'
J.S. Packer et al., Science 365, eaax1971 (2019)'	pha-4'	CD20080508_pha-4_3E3C5_1_L1.csv'	170	Protein Fusion'	/'
J.S. Packer et al., Science 365, eaax1971 (2019)'	pqm-1'	CD20160303_pqm-1_OP201_L2.csv'	165	Protein Fusion'	/'
J.S. Packer et al., Science 365, eaax1971 (2019)'	ref-1'	CD20111201_ref-1_17_L1.csv'	150	Promoter Fusion'	/'
J.S. Packer et al., Science 365, eaax1971 (2019)'	ref-2'	CD20081030_ref-2a_14_L1.csv'	115	Promoter Fusion'	/'
J.S. Packer et al., Science 365, eaax1971 (2019)'	ref-2'	CD20120808_ref-2a_1_L1.csv'	143	Promoter Fusion'	/'
J.S. Packer et al., Science 365, eaax1971 (2019)'	ref-2'	CD20141119_ref-2_OP520_L2.csv'	190	Protein Fusion'	/'
J.S. Packer et al., Science 365, eaax1971 (2019)'	sdz-38'	CD20081027_sdz-38_1_L2.csv'	146	Promoter Fusion'	/'
J.S. Packer et al., Science 365, eaax1971 (2019)'	sea-1'	CD20110825_sea-1_OP129_L1.csv'	130	Protein Fusion'	/'
J.S. Packer et al., Science 365, eaax1971 (2019)'	sea-1'	CD20110825_sea-1_OP129_L2.csv'	145	Protein Fusion'	/'
J.S. Packer et al., Science 365, eaax1971 (2019)'	sem-2'	CD20141201_sem-2_XIL0153_L2.csv'	130	Promoter Fusion'	/'
J.S. Packer et al., Science 365, eaax1971 (2019)'	sem-2'	CD20171128_sem-2_GFP_L1.csv'	125	Protein Fusion'	/'
J.S. Packer et al., Science 365, eaax1971 (2019)'	spr-4'	CD20130418_spr-4a_4_L1.csv'	142	Promoter Fusion'	/'
J.S. Packer et al., Science 365, eaax1971 (2019)'	spr-4'	CD20130418_spr-4a_4_L2.csv'	143	Promoter Fusion'	/'
J.S. Packer et al., Science 365, eaax1971 (2019)'	sptf-1'	CD20180613_707_sptf-1-GFP_L1.csv'	155	Protein Fusion'	/'
J.S. Packer et al., Science 365, eaax1971 (2019)'	tbx-2'	CD20110504_tbx-2_OP159_L1.csv'	160	Protein Fusion'	/'
J.S. Packer et al., Science 365, eaax1971 (2019)'	tbx-7'	CD20130827_tbx-7_L4.csv'	180	Protein Fusion'	/'
J.S. Packer et al., Science 365, eaax1971 (2019)'	tlp-1'	CD20090409_tlp-1_RW10609_L2.csv'	130	Promoter Fusion'	/'
J.S. Packer et al., Science 365, eaax1971 (2019)'	tlp-1'	CD20111003_tlp-1_L2.csv'	170	Promoter Fusion'	/'
J.S. Packer et al., Science 365, eaax1971 (2019)'	tlp-1'	CD20111003_tlp-1_L4.csv'	175	Promoter Fusion'	/'
J.S. Packer et al., Science 365, eaax1971 (2019)'	ttx-3'	CD20080916_ttx-3_8G1_14_L2.csv'	200	Protein Fusion'	/'
J.S. Packer et al., Science 365, eaax1971 (2019)'	ttx-3'	CD20110726_RW10713_L1.csv'	230	Protein Fusion'	/'
J.S. Packer et al., Science 365, eaax1971 (2019)'	unc-30'	CD20121115_unc-30_18_L1.csv'	180	Protein Fusion'	/'
J.S. Packer et al., Science 365, eaax1971 (2019)'	unc-30'	CD20121115_unc-30_18_L2.csv'	180	Protein Fusion'	/'
J.S. Packer et al., Science 365, eaax1971 (2019)'	unc-39'	CD20111205_unc-39_12.csv'	155	Promoter Fusion'	/'
J.S. Packer et al., Science 365, eaax1971 (2019)'	unc-42'	CD20150513_unc-42_XIL032_L1.csv'	180	Protein Fusion'	/'
J.S. Packer et al., Science 365, eaax1971 (2019)'	unc-86'	CD20130401_unc-86_14_L1.csv'	205	Protein Fusion'	/'
J.S. Packer et al., Science 365, eaax1971 (2019)'	unc-86'	CD20130401_unc-86_14_L2.csv'	205	Protein Fusion'	/'
J.S. Packer et al., Science 365, eaax1971 (2019)'	unc-86'	CD20150304_unc-86_XIL039_L1.csv'	190	Protein Fusion'	/'
J.S. Packer et al., Science 365, eaax1971 (2019)'	unc-120'	CD20140210_unc-120_12_L1.csv'	200	Promoter Fusion'	/'
J.S. Packer et al., Science 365, eaax1971 (2019)'	unc-130'	CD20110526_unc-130_9_L1.csv'	123	Promoter Fusion'	/'
J.S. Packer et al., Science 365, eaax1971 (2019)'	unc-130'	CD20110526_unc-130_9_L2.csv'	140	Promoter Fusion'	/'
J.S. Packer et al., Science 365, eaax1971 (2019)'	unc-130'	CD20091119_unc-130_9E1_4_L2.csv'	122	Protein Fusion'	/'
J.S. Packer et al., Science 365, eaax1971 (2019)'	vab-15'	CD20100324_vab-15_8_L1.csv'	139	Promoter Fusion'	/'
J.S. Packer et al., Science 365, eaax1971 (2019)'	vab-15'	CD20100615_vab-15_1_L1.csv'	147	Promoter Fusion'	/'
J.S. Packer et al., Science 365, eaax1971 (2019)'	vab-15'	CD20100615_vab-15_1_L2.csv'	153	Promoter Fusion'	/'
J.S. Packer et al., Science 365, eaax1971 (2019)'	vab-15'	CD20100629_vab-15_8_L1.csv'	141	Promoter Fusion'	/'
J.S. Packer et al., Science 365, eaax1971 (2019)'	zip-3'	CD20130410_zip-3_6_L1.csv'	120	Promoter Fusion'	/'
J.S. Packer et al., Science 365, eaax1971 (2019)'	zip-3'	CD20130410_zip-3_6_L2.csv'	126	Promoter Fusion'	/'
J.S. Packer et al., Science 365, eaax1971 (2019)'	zip-8'	CD20080924_F23F12_9_3_L2.csv'	166	Promoter Fusion'	/'
J.S. Packer et al., Science 365, eaax1971 (2019)'	ztf-11'	CD20140408_ztf-11_1.csv'	215	Protein Fusion'	/'
J.S. Packer et al., Science 365, eaax1971 (2019)'	cwn-1'	CD20100810_cwn-1_5_L1.csv'	263	Promoter Fusion'	/'
J.S. Packer et al., Science 365, eaax1971 (2019)'	nhr-2'	CD20121231_nhr-2_13_L1.csv'	130	Promoter Fusion'	/'
J.S. Packer et al., Science 365, eaax1971 (2019)'	nhr-2'	CD20121231_nhr-2_13_L2.csv'	140	Promoter Fusion'	/'
J.S. Packer et al., Science 365, eaax1971 (2019)'	pgp-3'	CD20150408_pgp-3_RW10185_L2.csv'	170	Promoter Fusion'	/'
J.S. Packer et al., Science 365, eaax1971 (2019)'	nhr-57'	CD20080809_nhr-57_9_L2.csv'	130	Promoter Fusion'	/'
J.S. Packer et al., Science 365, eaax1971 (2019)'	nhr-57'	CD20081021_nhr-57_4_L1.csv'	133	Promoter Fusion'	/'
J.S. Packer et al., Science 365, eaax1971 (2019)'	hlh-16'	CD20090505_hlh-16_8_L1.csv'	196	Promoter Fusion'	/'
J.S. Packer et al., Science 365, eaax1971 (2019)'	hlh-16'	CD20111011_L1.csv'	235	Protein Fusion'	/'
J.S. Packer et al., Science 365, eaax1971 (2019)'	cdc-5l'	CD20110405_D10818_1_L1.csv'	170	Promoter Fusion'	/'
J.S. Packer et al., Science 365, eaax1971 (2019)'	nhr-171'	CD20081104_nhr-171_17_L2.csv'	119	Promoter Fusion'	/'
J.S. Packer et al., Science 365, eaax1971 (2019)'	f38c2.7'	CD20080828_F38C2_7_12_L1.csv'	145	Promoter Fusion'	/'
J.S. Packer et al., Science 365, eaax1971 (2019)'	f38c2.7'	CD20120321_F38C27_4_L2.csv'	135	Promoter Fusion'	/'
J.S. Packer et al., Science 365, eaax1971 (2019)'	f21d5.9'	CD20080909_F21D5_9_5_L2.csv'	170	Promoter Fusion'	/'
J.S. Packer et al., Science 365, eaax1971 (2019)'	ceh-21'	CD20120918_ceh-21_8_L1.csv'	125	Promoter Fusion'	/'
J.S. Packer et al., Science 365, eaax1971 (2019)'	zk185.1'	CD20130222_ZK1851_4_L1.csv'	110	Protein Fusion'	/'
J.S. Packer et al., Science 365, eaax1971 (2019)'	zk185.1'	CD20130228_ZK1851_4_L1.csv'	126	Protein Fusion'	/'
J.S. Packer et al., Science 365, eaax1971 (2019)'	moe-3'	CD20081002_moe-3_8_L2.csv'	171	Promoter Fusion'	/'
J.S. Packer et al., Science 365, eaax1971 (2019)'	moe-3'	CD20111108_moe-3_10_L1.csv'	136	Promoter Fusion'	/'
J.S. Packer et al., Science 365, eaax1971 (2019)'	moe-3'	CD20111108_moe-3_10_L2.csv'	134	Promoter Fusion'	/'
J.S. Packer et al., Science 365, eaax1971 (2019)'	sma-9'	CD20110325_sma-9g_B_L1.csv'	160	Promoter Fusion'	/'
J.S. Packer et al., Science 365, eaax1971 (2019)'	lsy-27'	CD20101110_F47H41_14_L1.csv'	152	Promoter Fusion'	/'
J.S. Packer et al., Science 365, eaax1971 (2019)'	lsy-27'	CD20101110_F47H41_14_L2.csv'	143	Promoter Fusion'	/'
J.S. Packer et al., Science 365, eaax1971 (2019)'	lsy-27'	CD20101209_F47H41_2_L1.csv'	134	Promoter Fusion'	/'
J.S. Packer et al., Science 365, eaax1971 (2019)'	lsy-27'	CD20101209_F47H41_2_L2.csv'	143	Promoter Fusion'	/'
J.S. Packer et al., Science 365, eaax1971 (2019)'	nhr-68'	CD20080807_nhr-68_1_L1.csv'	140	Promoter Fusion'	/'
J.S. Packer et al., Science 365, eaax1971 (2019)'	nhr-68'	CD20081007_nhr-68_14_L2.csv'	142	Promoter Fusion'	/'
J.S. Packer et al., Science 365, eaax1971 (2019)'	nhr-68'	CD20090312_nhr-68_13_L1.csv'	157	Promoter Fusion'	/'
J.S. Packer et al., Science 365, eaax1971 (2019)'	dhhc-10'	CD20080930_K02G10_2_3_L1.csv'	145	Promoter Fusion'	/'
J.S. Packer et al., Science 365, eaax1971 (2019)'	dhhc-10'	CD20081024_K02G10_1_4_L2.csv'	138	Promoter Fusion'	/'
J.S. Packer et al., Science 365, eaax1971 (2019)'	mnm-2'	CD20081024_mnm-2_7_L2.csv'	121	Promoter Fusion'	/'
J.S. Packer et al., Science 365, eaax1971 (2019)'	mnm-2'	CD20110309_mnm-2_10_L1.csv'	135	Promoter Fusion'	/'
J.S. Packer et al., Science 365, eaax1971 (2019)'	mnm-2'	CD20110309_mnm-2_10_L2.csv'	135	Promoter Fusion'	/'
J.S. Packer et al., Science 365, eaax1971 (2019)'	nhr-69'	CD20081028_T23H4_2_5_L1.csv'	137	Promoter Fusion'	/'
J.S. Packer et al., Science 365, eaax1971 (2019)'	nhr-69'	CD20081028_T23H4_2_5_L2.csv'	132	Promoter Fusion'	/'
J.S. Packer et al., Science 365, eaax1971 (2019)'	nhr-69'	CD20090428_T23H4_2_2_L2.csv'	138	Promoter Fusion'	/'
J.S. Packer et al., Science 365, eaax1971 (2019)'	myrf-2'	CD20110429_F21A102b_8_L2.csv'	150	Promoter Fusion'	/'
J.S. Packer et al., Science 365, eaax1971 (2019)'	t22c8.3'	CD20081105_T22C8_3_1_L1.csv'	132	Promoter Fusion'	/'
J.S. Packer et al., Science 365, eaax1971 (2019)'	t22c8.3'	CD20091118_T22C8_3_11_L2.csv'	140	Promoter Fusion'	/'
J.S. Packer et al., Science 365, eaax1971 (2019)'	t22c8.3'	CD20100212_T22C83_5_L1.csv'	139	Promoter Fusion'	/'
J.S. Packer et al., Science 365, eaax1971 (2019)'	t22c8.3'	CD20100212_T22C83_5_L2.csv'	140	Promoter Fusion'	/'
J.S. Packer et al., Science 365, eaax1971 (2019)'	rbm-26'	CD20090505_B0336_3_13_L2.csv'	170	Promoter Fusion'	/'
J.S. Packer et al., Science 365, eaax1971 (2019)'	rbm-26'	CD20111017_B03363_9_L1.csv'	135	Promoter Fusion'	/'
J.S. Packer et al., Science 365, eaax1971 (2019)'	rbm-26'	CD20111017_B03363_9_L2.csv'	140	Promoter Fusion'	/'
J.S. Packer et al., Science 365, eaax1971 (2019)'	isw-1'	CD20090511_isw-1_3_L2.csv'	139	Promoter Fusion'	/'
J.S. Packer et al., Science 365, eaax1971 (2019)'	isw-1'	CD20111202_isw-1_2_L1.csv'	140	Promoter Fusion'	/'
J.S. Packer et al., Science 365, eaax1971 (2019)'	isw-1'	CD20111228_isw-1_2_L1.csv'	150	Promoter Fusion'	/'
J.S. Packer et al., Science 365, eaax1971 (2019)'	isw-1'	CD20121116_isw-1_OP181_L1.csv'	125	Protein Fusion'	/'
J.S. Packer et al., Science 365, eaax1971 (2019)'	isw-1'	CD20121116_isw-1_OP181_L2.csv'	125	Protein Fusion'	/'
J.S. Packer et al., Science 365, eaax1971 (2019)'	ceh-26'	CD20120426_JIM122_L2.csv'	240	Protein Fusion'	/'
J.S. Packer et al., Science 365, eaax1971 (2019)'	tps-2'	CD20090807_tps-2_12_L2.csv'	150	Promoter Fusion'	/'
J.S. Packer et al., Science 365, eaax1971 (2019)'	gadr-1'	CD20090806_F58D2_1_2_L2.csv'	132	Promoter Fusion'	/'
J.S. Packer et al., Science 365, eaax1971 (2019)'	hmg-11'	CD20090810_hmg-11_7_L2.csv'	154	Promoter Fusion'	/'
J.S. Packer et al., Science 365, eaax1971 (2019)'	hmg-11'	CD20120222_hmg-11_8_L1.csv'	142	Promoter Fusion'	/'
J.S. Packer et al., Science 365, eaax1971 (2019)'	attf-4'	CD20090812_C05D10_1b_3_L2.csv'	127	Promoter Fusion'	/'
J.S. Packer et al., Science 365, eaax1971 (2019)'	attf-4'	CD20100730_C05D101c_11_L2_CELTD_1.csv'	241	Promoter Fusion'	/'
J.S. Packer et al., Science 365, eaax1971 (2019)'	attf-4'	CD20120125_C05D101b_8_L1.csv'	160	Promoter Fusion'	/'
J.S. Packer et al., Science 365, eaax1971 (2019)'	attf-4'	CD20120125_C05D101b_8_L2.csv'	136	Promoter Fusion'	/'
J.S. Packer et al., Science 365, eaax1971 (2019)'	attf-4'	CD20120301_C05D101b_10.csv'	130	Promoter Fusion'	/'
J.S. Packer et al., Science 365, eaax1971 (2019)'	dpy-31'	CD20091023_dpy-31_3_L1.csv'	153	Promoter Fusion'	/'
J.S. Packer et al., Science 365, eaax1971 (2019)'	f17c11.1'	CD20091116_F17C11_5_12_L2.csv'	137	Promoter Fusion'	/'
J.S. Packer et al., Science 365, eaax1971 (2019)'	pbrm-1'	CD20100506_tag-185_3_L1.csv'	140	Promoter Fusion'	/'
J.S. Packer et al., Science 365, eaax1971 (2019)'	acp-5'	CD20120810_F3B117_6_L1.csv'	135	Promoter Fusion'	/'
J.S. Packer et al., Science 365, eaax1971 (2019)'	acp-5'	CD20120810_F3B117_6_L2.csv'	125	Promoter Fusion'	/'
J.S. Packer et al., Science 365, eaax1971 (2019)'	atf-2'	CD20140717_atf-2_13_L1.csv'	210	Promoter Fusion'	/'
J.S. Packer et al., Science 365, eaax1971 (2019)'	c05b5.4'	CD20100421_C05B54_1_L1.csv'	141	Promoter Fusion'	/'
J.S. Packer et al., Science 365, eaax1971 (2019)'	c05b5.4'	CD20100421_C05B54_1_L2.csv'	140	Promoter Fusion'	/'
J.S. Packer et al., Science 365, eaax1971 (2019)'	sprp-4'	CD20111129_C28G14_17_L1.csv'	160	Promoter Fusion'	/'
J.S. Packer et al., Science 365, eaax1971 (2019)'	ccch-2'	CD20111223_F38C25_7_L1.csv'	150	Promoter Fusion'	/'
J.S. Packer et al., Science 365, eaax1971 (2019)'	ccch-2'	CD20111223_F38C25_7_L2.csv'	130	Promoter Fusion'	/'
J.S. Packer et al., Science 365, eaax1971 (2019)'	ccch-5'	CD20120927_Y57G11C25_17_L2.csv'	138	Promoter Fusion'	/'
J.S. Packer et al., Science 365, eaax1971 (2019)'	cebp-2'	CD20130619_cebp-2_0_L1.csv'	158	Promoter Fusion'	/'
J.S. Packer et al., Science 365, eaax1971 (2019)'	cebp-2'	CD20130619_cebp-2_0_L2.csv'	170	Promoter Fusion'	/'
J.S. Packer et al., Science 365, eaax1971 (2019)'	ceh-58'	CD20100318_C07E36_5_L1.csv'	149	Promoter Fusion'	/'
J.S. Packer et al., Science 365, eaax1971 (2019)'	ceh-58'	CD20100318_C07E36_5_L2.csv'	153	Promoter Fusion'	/'
J.S. Packer et al., Science 365, eaax1971 (2019)'	ceh-58'	CD20100614_C07E36_8_L1.csv'	170	Promoter Fusion'	/'
J.S. Packer et al., Science 365, eaax1971 (2019)'	ceh-58'	CD20100706_C07E36_7.csv'	151	Promoter Fusion'	/'
J.S. Packer et al., Science 365, eaax1971 (2019)'	ceh-58'	CD20100915_C07E36_8_L1.csv'	150	Promoter Fusion'	/'
J.S. Packer et al., Science 365, eaax1971 (2019)'	ceh-58'	CD20100915_C07E36_8_L2.csv'	143	Promoter Fusion'	/'
J.S. Packer et al., Science 365, eaax1971 (2019)'	ceh-58'	CD20101012_C07E36_7_L1.csv'	155	Promoter Fusion'	/'
J.S. Packer et al., Science 365, eaax1971 (2019)'	ceh-58'	CD20101012_C07E36_7_L2.csv'	164	Promoter Fusion'	/'
J.S. Packer et al., Science 365, eaax1971 (2019)'	ceh-86'	CD20130708_F42G26_1_L1.csv'	149	Promoter Fusion'	/'
J.S. Packer et al., Science 365, eaax1971 (2019)'	ceh-93'	CD20110914_R04A95_17_L1.csv'	135	Promoter Fusion'	/'
J.S. Packer et al., Science 365, eaax1971 (2019)'	cep-1'	CD20090706_cep-1_b_1_L2.csv'	143	Promoter Fusion'	/'
J.S. Packer et al., Science 365, eaax1971 (2019)'	ces-1'	CD20100817_ces-1_OP174_L1.csv'	155	Protein Fusion'	/'
J.S. Packer et al., Science 365, eaax1971 (2019)'	ces-1'	CD20150303_ces-1_XIL049_L1.csv'	185	Protein Fusion'	/'
J.S. Packer et al., Science 365, eaax1971 (2019)'	chd-7'	CD20120516_tag-192_10_L1.csv'	161	Promoter Fusion'	/'
J.S. Packer et al., Science 365, eaax1971 (2019)'	chd-7'	CD20120516_tag-192_10_L2.csv'	161	Promoter Fusion'	/'
J.S. Packer et al., Science 365, eaax1971 (2019)'	copa-1'	CD20110628_Y71F9AL17_5_L2.csv'	140	Promoter Fusion'	/'
J.S. Packer et al., Science 365, eaax1971 (2019)'	cpl-1'	CD20100225_cpl-1_7.csv'	225	Promoter Fusion'	/'
J.S. Packer et al., Science 365, eaax1971 (2019)'	cpl-1'	CD20100302_cpl-1_5_L2.csv'	145	Promoter Fusion'	/'
J.S. Packer et al., Science 365, eaax1971 (2019)'	cpl-1'	CD20100624_cpl-1_8_L1.csv'	165	Promoter Fusion'	/'
J.S. Packer et al., Science 365, eaax1971 (2019)'	cpl-1'	CD20100624_cpl-1_8_L2.csv'	144	Promoter Fusion'	/'
J.S. Packer et al., Science 365, eaax1971 (2019)'	daf-16'	CD20111220_daf-16f_1_L1.csv'	185	Promoter Fusion'	/'
J.S. Packer et al., Science 365, eaax1971 (2019)'	daf-16'	CD20111220_daf-16f_1_L2.csv'	185	Promoter Fusion'	/'
J.S. Packer et al., Science 365, eaax1971 (2019)'	dpy-30'	CD20100817_dpy-30_EG4864_L1.csv'	140	Promoter Fusion'	/'
J.S. Packer et al., Science 365, eaax1971 (2019)'	dpy-30'	CD20100817_dpy-30_EG4864_L2.csv'	142	Promoter Fusion'	/'
J.S. Packer et al., Science 365, eaax1971 (2019)'	drr-1'	CD20100621_drr-1_11_L2.csv'	165	Promoter Fusion'	/'
J.S. Packer et al., Science 365, eaax1971 (2019)'	egl-27'	CD20111007_egl-27a_18_L1.csv'	140	Promoter Fusion'	/'
J.S. Packer et al., Science 365, eaax1971 (2019)'	egl-27'	CD20111208_egl-27a_2_L1.csv'	140	Promoter Fusion'	/'
J.S. Packer et al., Science 365, eaax1971 (2019)'	egl-27'	CD20111208_egl-27a_2_L2.csv'	150	Promoter Fusion'	/'
J.S. Packer et al., Science 365, eaax1971 (2019)'	f13c5.2'	CD20160304_F13C52_OP605_L2.csv'	140	Protein Fusion'	/'
J.S. Packer et al., Science 365, eaax1971 (2019)'	f22d6.2'	CD20130424_F22D62_4_L1.csv'	140	Promoter Fusion'	/'
J.S. Packer et al., Science 365, eaax1971 (2019)'	f32h2.6'	CD20090810_F32H2_6_b_L2.csv'	154	Promoter Fusion'	/'
J.S. Packer et al., Science 365, eaax1971 (2019)'	f36a2.3'	CD20100323_F36A23_9_L1.csv'	134	Promoter Fusion'	/'
J.S. Packer et al., Science 365, eaax1971 (2019)'	f37b4.10'	CD20121207_F37B410_B_L1.csv'	195	Protein Fusion'	/'
J.S. Packer et al., Science 365, eaax1971 (2019)'	hinf-1'	CD20120109_F39B21_3_L1.csv'	138	Promoter Fusion'	/'
J.S. Packer et al., Science 365, eaax1971 (2019)'	oef-1'	CD20110825_F49E82_5_L1.csv'	140	Protein Fusion'	/'
J.S. Packer et al., Science 365, eaax1971 (2019)'	oef-1'	CD20110825_F49E82_5_L2.csv'	135	Protein Fusion'	/'
J.S. Packer et al., Science 365, eaax1971 (2019)'	f57a8.1'	CD20140219_F57A81_21_L1.csv'	180	Promoter Fusion'	/'
J.S. Packer et al., Science 365, eaax1971 (2019)'	f57c9.4'	CD20120113_F57C94a_19_L1.csv'	135	Promoter Fusion'	/'
J.S. Packer et al., Science 365, eaax1971 (2019)'	f57c9.4'	CD20120227_F57C94a_9_L1.csv'	128	Promoter Fusion'	/'
J.S. Packer et al., Science 365, eaax1971 (2019)'	flh-1'	CD20120507_Y11D7A12_4_L1.csv'	140	Promoter Fusion'	/'
J.S. Packer et al., Science 365, eaax1971 (2019)'	flh-1'	CD20120507_Y11D7A12_4_L2.csv'	140	Promoter Fusion'	/'
J.S. Packer et al., Science 365, eaax1971 (2019)'	flh-3'	CD20100706_Y11D7A13_7_L1.csv'	157	Promoter Fusion'	/'
J.S. Packer et al., Science 365, eaax1971 (2019)'	flh-3'	CD20100706_Y11D7A13_7_L2.csv'	150	Promoter Fusion'	/'
J.S. Packer et al., Science 365, eaax1971 (2019)'	hlh-19'	CD20140617_hlh-19_2_L2.csv'	205	Promoter Fusion'	/'
J.S. Packer et al., Science 365, eaax1971 (2019)'	hsf-1'	CD20141001_hsf-1_RW10438_L1.csv'	220	Promoter Fusion'	/'
J.S. Packer et al., Science 365, eaax1971 (2019)'	icd-2'	CD20151028_icd-2_XIL111_L1.csv'	190	Promoter Fusion'	/'
J.S. Packer et al., Science 365, eaax1971 (2019)'	icd-2'	CD20140708_icd-2_XIL048_L2.csv'	200	Protein Fusion'	/'
J.S. Packer et al., Science 365, eaax1971 (2019)'	pnp-1'	CD20111219_K02D71_5_L1.csv'	207	Promoter Fusion'	/'
J.S. Packer et al., Science 365, eaax1971 (2019)'	pnp-1'	CD20120202_K02D71_10_L1.csv'	140	Promoter Fusion'	/'
J.S. Packer et al., Science 365, eaax1971 (2019)'	pnp-1'	CD20120202_K02D71_10_L2.csv'	185	Promoter Fusion'	/'
J.S. Packer et al., Science 365, eaax1971 (2019)'	lin-40'	CD20120215_egr-1a_B_L1.csv'	131	Promoter Fusion'	/'
J.S. Packer et al., Science 365, eaax1971 (2019)'	lin-40'	CD20120215_egr-1a_B_L2.csv'	132	Promoter Fusion'	/'
J.S. Packer et al., Science 365, eaax1971 (2019)'	lin-40'	CD20130507_egr-1_2_L1.csv'	136	Protein Fusion'	/'
J.S. Packer et al., Science 365, eaax1971 (2019)'	lin-40'	CD20130507_egr-1_2_L2.csv'	125	Protein Fusion'	/'
J.S. Packer et al., Science 365, eaax1971 (2019)'	lpd-2'	CD20120109_lpd-2_10_L1.csv'	165	Promoter Fusion'	/'
J.S. Packer et al., Science 365, eaax1971 (2019)'	lpd-2'	CD20120109_lpd-2_10_L2.csv'	165	Promoter Fusion'	/'
J.S. Packer et al., Science 365, eaax1971 (2019)'	mes-4'	CD20141212_mes-4_RW11861_L1.csv'	183	Protein Fusion'	/'
J.S. Packer et al., Science 365, eaax1971 (2019)'	nhr-15'	CD20120229_nhr-15_B_L2.csv'	249	Promoter Fusion'	/'
J.S. Packer et al., Science 365, eaax1971 (2019)'	nhr-15'	CD20120405_nhr-15_B_L1.csv'	230	Promoter Fusion'	/'
J.S. Packer et al., Science 365, eaax1971 (2019)'	nhr-28'	CD20101109_nhr-28b_5_L1.csv'	131	Promoter Fusion'	/'
J.S. Packer et al., Science 365, eaax1971 (2019)'	nhr-28'	CD20101109_nhr-28b_5_L2.csv'	140	Promoter Fusion'	/'
J.S. Packer et al., Science 365, eaax1971 (2019)'	nhr-34'	CD20111228_nhr-34a_20_L1.csv'	140	Promoter Fusion'	/'
J.S. Packer et al., Science 365, eaax1971 (2019)'	nhr-34'	CD20111228_nhr-34a_20_L2.csv'	150	Promoter Fusion'	/'
J.S. Packer et al., Science 365, eaax1971 (2019)'	nhr-64'	CD20111004_nhr-64_8_L2.csv'	125	Promoter Fusion'	/'
J.S. Packer et al., Science 365, eaax1971 (2019)'	nhr-64'	CD20111122_nhr-64_14_L1.csv'	160	Promoter Fusion'	/'
J.S. Packer et al., Science 365, eaax1971 (2019)'	nhr-71'	CD20100319_nhr-71_3_L1.csv'	138	Promoter Fusion'	/'
J.S. Packer et al., Science 365, eaax1971 (2019)'	nhr-71'	CD20100319_nhr-71_3_L2.csv'	138	Promoter Fusion'	/'
J.S. Packer et al., Science 365, eaax1971 (2019)'	nhr-71'	CD20100330_nhr-71_8_L1.csv'	151	Promoter Fusion'	/'
J.S. Packer et al., Science 365, eaax1971 (2019)'	nhr-71'	CD20100330_nhr-71_8_L2_CELTD_7.csv'	154	Promoter Fusion'	/'
J.S. Packer et al., Science 365, eaax1971 (2019)'	nhr-71'	CD20100416_nhr-71_5_L1.csv'	143	Promoter Fusion'	/'
J.S. Packer et al., Science 365, eaax1971 (2019)'	nurf-1'	CD20100503_unc-6_B_L1.csv'	140	Promoter Fusion'	/'
J.S. Packer et al., Science 365, eaax1971 (2019)'	nurf-1'	CD20100614_nurf-1f_6_L1.csv'	160	Promoter Fusion'	/'
J.S. Packer et al., Science 365, eaax1971 (2019)'	nurf-1'	CD20100614_nurf-1f_6_L2.csv'	157	Promoter Fusion'	/'
J.S. Packer et al., Science 365, eaax1971 (2019)'	nurf-1'	CD20100728_unc-6_1_L1.csv'	140	Promoter Fusion'	/'
J.S. Packer et al., Science 365, eaax1971 (2019)'	nurf-1'	CD20120607_nurf-1d_5_L1.csv'	140	Promoter Fusion'	/'
J.S. Packer et al., Science 365, eaax1971 (2019)'	pes-10'	CD20130925_pes-10_19_L1.csv'	130	Promoter Fusion'	/'
J.S. Packer et al., Science 365, eaax1971 (2019)'	pes-10'	CD20130925_pes-10_19_L2.csv'	131	Promoter Fusion'	/'
J.S. Packer et al., Science 365, eaax1971 (2019)'	r02d3.7'	CD20120201_R02D37_16.csv'	155	Promoter Fusion'	/'
J.S. Packer et al., Science 365, eaax1971 (2019)'	repo-1'	CD20100507_F11A102_8_L1.csv'	136	Promoter Fusion'	/'
J.S. Packer et al., Science 365, eaax1971 (2019)'	repo-1'	CD20100507_F11A102_8_L2.csv'	150	Promoter Fusion'	/'
J.S. Packer et al., Science 365, eaax1971 (2019)'	sex-1'	CD20111128_sex-1_14_L1.csv'	140	Promoter Fusion'	/'
J.S. Packer et al., Science 365, eaax1971 (2019)'	sex-1'	CD20111128_sex-1_14_L2.csv'	150	Promoter Fusion'	/'
J.S. Packer et al., Science 365, eaax1971 (2019)'	sex-1'	CD20130523_sex-1_B_L2.csv'	165	Protein Fusion'	/'
J.S. Packer et al., Science 365, eaax1971 (2019)'	somi-1'	CD20110208_somi-1b_1_L1.csv'	135	Promoter Fusion'	/'
J.S. Packer et al., Science 365, eaax1971 (2019)'	somi-1'	CD20110308_somi-1b_1_L1.csv'	170	Promoter Fusion'	/'
J.S. Packer et al., Science 365, eaax1971 (2019)'	somi-1'	CD20110308_somi-1b_1_L2.csv'	145	Promoter Fusion'	/'
J.S. Packer et al., Science 365, eaax1971 (2019)'	sup-37'	CD20080501_C01B7_1_1.csv'	230	Promoter Fusion'	/'
J.S. Packer et al., Science 365, eaax1971 (2019)'	eppl-1'	CD20101005_T01B112_20_L1.csv'	142	Promoter Fusion'	/'
J.S. Packer et al., Science 365, eaax1971 (2019)'	eppl-1'	CD20101005_T01B112_20_L2.csv'	137	Promoter Fusion'	/'
J.S. Packer et al., Science 365, eaax1971 (2019)'	t19b10.2'	CD20100802_T19B102_10_L1.csv'	136	Promoter Fusion'	/'
J.S. Packer et al., Science 365, eaax1971 (2019)'	t19b10.2'	CD20100802_T19B102_10_L2.csv'	132	Promoter Fusion'	/'
J.S. Packer et al., Science 365, eaax1971 (2019)'	t19b10.2'	CD20100914_T19B102_9_L1.csv'	146	Promoter Fusion'	/'
J.S. Packer et al., Science 365, eaax1971 (2019)'	t19b10.2'	CD20100914_T19B102_9_L2.csv'	146	Promoter Fusion'	/'
J.S. Packer et al., Science 365, eaax1971 (2019)'	t19b10.2'	CD20110413_T19B102_1_L1.csv'	140	Promoter Fusion'	/'
J.S. Packer et al., Science 365, eaax1971 (2019)'	t19b10.2'	CD20110413_T19B102_1_L2.csv'	180	Promoter Fusion'	/'
J.S. Packer et al., Science 365, eaax1971 (2019)'	t20f7.1'	CD20100618_T20F71_4_L2.csv'	157	Promoter Fusion'	/'
J.S. Packer et al., Science 365, eaax1971 (2019)'	t28h10.3'	CD20090309_T28H10_3_8_L2.csv'	160	Promoter Fusion'	/'
J.S. Packer et al., Science 365, eaax1971 (2019)'	t28h10.3'	CD20140318_T28H103_1_L2.csv'	160	Promoter Fusion'	/'
J.S. Packer et al., Science 365, eaax1971 (2019)'	vab-23'	CD20100707_ZK9303b_6_L1.csv'	140	Promoter Fusion'	/'
J.S. Packer et al., Science 365, eaax1971 (2019)'	vab-23'	CD20100707_ZK9303b_6_L2.csv'	138	Promoter Fusion'	/'
J.S. Packer et al., Science 365, eaax1971 (2019)'	wrm-1'	CD20111201_wrm-1_rw11573_L1.csv'	135	Promoter Fusion'	/'
J.S. Packer et al., Science 365, eaax1971 (2019)'	y116a8c.19'	CD20131008_Y116A8C19_11_L1.csv'	125	Promoter Fusion'	/'
J.S. Packer et al., Science 365, eaax1971 (2019)'	y116a8c.19'	CD20131008_Y116A8C19_11_L2.csv'	130	Promoter Fusion'	/'
J.S. Packer et al., Science 365, eaax1971 (2019)'	y116a8c.20'	CD20151027_Y116A8C20_RW11955_L2.csv'	140	Promoter Fusion'	/'
J.S. Packer et al., Science 365, eaax1971 (2019)'	rml-5'	CD20110307_Y71G12B6_10_L1.csv'	140	Promoter Fusion'	/'
J.S. Packer et al., Science 365, eaax1971 (2019)'	rml-5'	CD20110307_Y71G12B6_10_L2.csv'	128	Promoter Fusion'	/'
J.S. Packer et al., Science 365, eaax1971 (2019)'	rml-5'	CD20110629_Y71G12B6_16_L2.csv'	200	Promoter Fusion'	/'
J.S. Packer et al., Science 365, eaax1971 (2019)'	ztf-13'	CD20130522_ztf-13_0_L1.csv'	155	Promoter Fusion'	/'
J.S. Packer et al., Science 365, eaax1971 (2019)'	ztf-16'	CD20130104_R08E34a_14_L2.csv'	150	Promoter Fusion'	/'
J.S. Packer et al., Science 365, eaax1971 (2019)'	ztf-16'	CD20131120_mal-1_GFP_L1.csv'	155	Protein Fusion'	/'
J.S. Packer et al., Science 365, eaax1971 (2019)'	ztf-3'	CD20130604_ztf-3_14_L2.csv'	130	Promoter Fusion'	/'
J.S. Packer et al., Science 365, eaax1971 (2019)'	elf-1'	CD20140403_elf-1a_XIL035_L2.csv'	200	Promoter Fusion'	/'
J.S. Packer et al., Science 365, eaax1971 (2019)'	hlh-13'	CD20180618_113X744_hlh-13-GFP_L4.csv'	235	Protein Fusion'	/'
J.S. Packer et al., Science 365, eaax1971 (2019)'	hlh-29'	CD20150402_hlh-29_XIL105_L2.csv'	208	Protein Fusion'	/'
J.S. Packer et al., Science 365, eaax1971 (2019)'	hlh-6'	CD20150406_hlh-6_L1.csv'	235	Protein Fusion'	/'
J.S. Packer et al., Science 365, eaax1971 (2019)'	sbp-1'	CD20140311_sbp-1_CE1338_L1.csv'	180	Protein Fusion'	/'
J.S. Packer et al., Science 365, eaax1971 (2019)'	sys-1'	CD20130201_sys-1_L1.csv'	210	Protein Fusion'	/'
X. Ma et al., Nat. Methods 18, 893-902 (2021)'	nhr-25'	NHR-25_RW10348.csv'	192	Protein Fusion'	/'
X. Ma et al., Nat. Methods 18, 893-902 (2021)'	hlh-1'	HLH-1_RW10481.csv'	194	Protein Fusion'	/'
X. Ma et al., Nat. Methods 18, 893-902 (2021)'	aha-1'	AHA-1_SYS135.csv'	195	Protein Fusion'	/'
X. Ma et al., Nat. Methods 18, 893-902 (2021)'	ahr-1'	AHR-1_SYS571.csv'	203	Protein Fusion'	/'
X. Ma et al., Nat. Methods 18, 893-902 (2021)'	alr-1'	ALR-1_RW10757.csv'	199	Protein Fusion'	/'
X. Ma et al., Nat. Methods 18, 893-902 (2021)'	alr-1'	ALR-1_SYS139.csv'	215	Protein Fusion'	/'
X. Ma et al., Nat. Methods 18, 893-902 (2021)'	aly-1'	ALY-1_SYS619.csv'	211	Protein Fusion'	/'
X. Ma et al., Nat. Methods 18, 893-902 (2021)'	aly-2'	ALY-2_SYS721.csv'	184	Protein Fusion'	/'
X. Ma et al., Nat. Methods 18, 893-902 (2021)'	aptf-1'	APTF-1_SYS114.csv'	241	Protein Fusion'	/'
X. Ma et al., Nat. Methods 18, 893-902 (2021)'	arid-1'	ARID-1_SYS679.csv'	208	Protein Fusion'	/'
X. Ma et al., Nat. Methods 18, 893-902 (2021)'	ast-1'	AST-1_SYS1190.csv'	248	Protein Fusion'	/'
X. Ma et al., Nat. Methods 18, 893-902 (2021)'	atf-7'	ATF-7_SYS495.csv'	217	Protein Fusion'	/'
X. Ma et al., Nat. Methods 18, 893-902 (2021)'	atfs-1'	ATFS-1_SYS592.csv'	197	Protein Fusion'	/'
X. Ma et al., Nat. Methods 18, 893-902 (2021)'	athp-1'	ATHP-1_SYS550.csv'	216	Protein Fusion'	/'
X. Ma et al., Nat. Methods 18, 893-902 (2021)'	baz-2'	BAZ-2_SYS677.csv'	191	Protein Fusion'	/'
X. Ma et al., Nat. Methods 18, 893-902 (2021)'	bcl-11'	BCL-11_SYS581.csv'	200	Protein Fusion'	/'
X. Ma et al., Nat. Methods 18, 893-902 (2021)'	bed-3'	BED-3_SYS563.csv'	242	Protein Fusion'	/'
X. Ma et al., Nat. Methods 18, 893-902 (2021)'	blmp-1'	BLMP-1_SYS458.csv'	199	Protein Fusion'	/'
X. Ma et al., Nat. Methods 18, 893-902 (2021)'	bnc-1'	BNC-1_SYS149.csv'	194	Protein Fusion'	/'
X. Ma et al., Nat. Methods 18, 893-902 (2021)'	znf-622'	C16A3.4_SYS492.csv'	199	Protein Fusion'	/'
X. Ma et al., Nat. Methods 18, 893-902 (2021)'	camt-1'	CAMT-1_SYS228.csv'	200	Protein Fusion'	/'
X. Ma et al., Nat. Methods 18, 893-902 (2021)'	cebp-1'	CEBP-1_SYS451.csv'	204	Protein Fusion'	/'
X. Ma et al., Nat. Methods 18, 893-902 (2021)'	ceh-1'	CEH-1_SYS494.csv'	196	Protein Fusion'	/'
X. Ma et al., Nat. Methods 18, 893-902 (2021)'	ceh-2'	CEH-2_SYS606.csv'	207	Protein Fusion'	/'
X. Ma et al., Nat. Methods 18, 893-902 (2021)'	ceh-5'	CEH-5_SYS424.csv'	198	Protein Fusion'	/'
X. Ma et al., Nat. Methods 18, 893-902 (2021)'	ceh-6'	CEH-6_RW10871.csv'	219	Protein Fusion'	/'
X. Ma et al., Nat. Methods 18, 893-902 (2021)'	ceh-7'	CEH-7_SYS578.csv'	203	Protein Fusion'	/'
X. Ma et al., Nat. Methods 18, 893-902 (2021)'	ceh-8'	CEH-8_SYS1048.csv'	198	Protein Fusion'	/'
X. Ma et al., Nat. Methods 18, 893-902 (2021)'	ceh-9'	CEH-9_SYS161.csv'	199	Protein Fusion'	/'
X. Ma et al., Nat. Methods 18, 893-902 (2021)'	ceh-10'	CEH-10_SYS427.csv'	218	Protein Fusion'	/'
X. Ma et al., Nat. Methods 18, 893-902 (2021)'	ceh-12'	CEH-12_SYS629.csv'	193	Protein Fusion'	/'
X. Ma et al., Nat. Methods 18, 893-902 (2021)'	ceh-13'	CEH-13_JIM356.csv'	247	Protein Fusion'	/'
X. Ma et al., Nat. Methods 18, 893-902 (2021)'	ceh-14'	CEH-14_RW10726.csv'	193	Protein Fusion'	/'
X. Ma et al., Nat. Methods 18, 893-902 (2021)'	ceh-14'	CEH-14_SYS1053.csv'	209	Protein Fusion'	/'
X. Ma et al., Nat. Methods 18, 893-902 (2021)'	ceh-16'	CEH-16_SYS101.csv'	211	Protein Fusion'	/'
X. Ma et al., Nat. Methods 18, 893-902 (2021)'	ceh-17'	CEH-17_SYS608.csv'	182	Protein Fusion'	/'
X. Ma et al., Nat. Methods 18, 893-902 (2021)'	ceh-18'	CEH-18_SYS177.csv'	222	Protein Fusion'	/'
X. Ma et al., Nat. Methods 18, 893-902 (2021)'	ceh-19'	CEH-19_SYS179.csv'	219	Protein Fusion'	/'
X. Ma et al., Nat. Methods 18, 893-902 (2021)'	ceh-20'	CEH-20_SYS432.csv'	205	Protein Fusion'	/'
X. Ma et al., Nat. Methods 18, 893-902 (2021)'	ceh-20'	CEH-20_SYS1010.csv'	212	Protein Fusion'	/'
X. Ma et al., Nat. Methods 18, 893-902 (2021)'	ceh-22'	CEH-22_SYS141.csv'	184	Protein Fusion'	/'
X. Ma et al., Nat. Methods 18, 893-902 (2021)'	ceh-23'	CEH-23_SYS636.csv'	198	Protein Fusion'	/'
X. Ma et al., Nat. Methods 18, 893-902 (2021)'	ceh-23'	CEH-23_SYS1011.csv'	202	Protein Fusion'	/'
X. Ma et al., Nat. Methods 18, 893-902 (2021)'	ceh-24'	CEH-24_SYS118.csv'	212	Protein Fusion'	/'
X. Ma et al., Nat. Methods 18, 893-902 (2021)'	ceh-27'	CEH-27_SYS89.csv'	210	Protein Fusion'	/'
X. Ma et al., Nat. Methods 18, 893-902 (2021)'	ceh-28'	CEH-28_SYS635.csv'	195	Protein Fusion'	/'
X. Ma et al., Nat. Methods 18, 893-902 (2021)'	ceh-30'	CEH-30_SYS744.csv'	201	Protein Fusion'	/'
X. Ma et al., Nat. Methods 18, 893-902 (2021)'	ceh-31'	CEH-31_SYS175.csv'	223	Protein Fusion'	/'
X. Ma et al., Nat. Methods 18, 893-902 (2021)'	ceh-31'	CEH-31_SYS867.csv'	207	Protein Fusion'	/'
X. Ma et al., Nat. Methods 18, 893-902 (2021)'	ceh-32'	CEH-32_SYS85.csv'	204	Protein Fusion'	/'
X. Ma et al., Nat. Methods 18, 893-902 (2021)'	ceh-33'	CEH-33_SYS601.csv'	198	Protein Fusion'	/'
X. Ma et al., Nat. Methods 18, 893-902 (2021)'	ceh-34'	CEH-34_SYS173.csv'	202	Protein Fusion'	/'
X. Ma et al., Nat. Methods 18, 893-902 (2021)'	ceh-36'	CEH-36_SYS653.csv'	225	Protein Fusion'	/'
X. Ma et al., Nat. Methods 18, 893-902 (2021)'	ceh-38'	CEH-38_SYS162.csv'	236	Protein Fusion'	/'
X. Ma et al., Nat. Methods 18, 893-902 (2021)'	ceh-39'	CEH-39_SYS401.csv'	216	Protein Fusion'	/'
X. Ma et al., Nat. Methods 18, 893-902 (2021)'	ceh-40'	CEH-40_SYS180.csv'	253	Protein Fusion'	/'
X. Ma et al., Nat. Methods 18, 893-902 (2021)'	ceh-41'	CEH-41_SYS425.csv'	210	Protein Fusion'	/'
X. Ma et al., Nat. Methods 18, 893-902 (2021)'	ceh-43'	CEH-43_SYS90.csv'	213	Protein Fusion'	/'
X. Ma et al., Nat. Methods 18, 893-902 (2021)'	ceh-44'	CEH-44_SYS672.csv'	214	Protein Fusion'	/'
X. Ma et al., Nat. Methods 18, 893-902 (2021)'	ceh-45'	CEH-45_SYS634.csv'	210	Protein Fusion'	/'
X. Ma et al., Nat. Methods 18, 893-902 (2021)'	ceh-48'	CEH-48_SYS402.csv'	204	Protein Fusion'	/'
X. Ma et al., Nat. Methods 18, 893-902 (2021)'	ceh-51'	CEH-51_SYS397.csv'	222	Protein Fusion'	/'
X. Ma et al., Nat. Methods 18, 893-902 (2021)'	ceh-53'	CEH-53_SYS580.csv'	192	Protein Fusion'	/'
X. Ma et al., Nat. Methods 18, 893-902 (2021)'	ceh-54'	CEH-54_SYS598.csv'	211	Protein Fusion'	/'
X. Ma et al., Nat. Methods 18, 893-902 (2021)'	ceh-60'	CEH-60_SYS675.csv'	206	Protein Fusion'	/'
X. Ma et al., Nat. Methods 18, 893-902 (2021)'	ceh-74'	CEH-74_SYS136.csv'	211	Protein Fusion'	/'
X. Ma et al., Nat. Methods 18, 893-902 (2021)'	ceh-82'	CEH-82_SYS609.csv'	217	Protein Fusion'	/'
X. Ma et al., Nat. Methods 18, 893-902 (2021)'	ceh-83'	CEH-83_SYS396.csv'	200	Protein Fusion'	/'
X. Ma et al., Nat. Methods 18, 893-902 (2021)'	ceh-88'	CEH-88_SYS568.csv'	209	Protein Fusion'	/'
X. Ma et al., Nat. Methods 18, 893-902 (2021)'	ceh-90'	CEH-90_SYS399.csv'	218	Protein Fusion'	/'
X. Ma et al., Nat. Methods 18, 893-902 (2021)'	ces-2'	CES-2_SYS443.csv'	208	Protein Fusion'	/'
X. Ma et al., Nat. Methods 18, 893-902 (2021)'	cfi-1'	CFI-1_SYS611.csv'	210	Protein Fusion'	/'
X. Ma et al., Nat. Methods 18, 893-902 (2021)'	che-1'	CHE-1_SYS570.csv'	218	Protein Fusion'	/'
X. Ma et al., Nat. Methods 18, 893-902 (2021)'	cnd-1'	CND-1_RW10434.csv'	202	Protein Fusion'	/'
X. Ma et al., Nat. Methods 18, 893-902 (2021)'	cnd-1'	CND-1_SYS393.csv'	204	Protein Fusion'	/'
X. Ma et al., Nat. Methods 18, 893-902 (2021)'	cog-1'	COG-1_SYS144.csv'	223	Protein Fusion'	/'
X. Ma et al., Nat. Methods 18, 893-902 (2021)'	crh-2'	CRH-2_SYS274.csv'	173	Protein Fusion'	/'
X. Ma et al., Nat. Methods 18, 893-902 (2021)'	daf-3'	DAF-3_SYS542.csv'	206	Protein Fusion'	/'
X. Ma et al., Nat. Methods 18, 893-902 (2021)'	daf-8'	DAF-8_SYS605.csv'	213	Protein Fusion'	/'
X. Ma et al., Nat. Methods 18, 893-902 (2021)'	daf-12'	DAF-12_SYS588.csv'	206	Protein Fusion'	/'
X. Ma et al., Nat. Methods 18, 893-902 (2021)'	daf-19'	DAF-19_SYS541.csv'	214	Protein Fusion'	/'
X. Ma et al., Nat. Methods 18, 893-902 (2021)'	dmd-4'	DMD-4_SYS137.csv'	214	Protein Fusion'	/'
X. Ma et al., Nat. Methods 18, 893-902 (2021)'	dmd-5'	DMD-5_SYS429.csv'	192	Protein Fusion'	/'
X. Ma et al., Nat. Methods 18, 893-902 (2021)'	dnj-17'	DNJ-17_SYS493.csv'	192	Protein Fusion'	/'
X. Ma et al., Nat. Methods 18, 893-902 (2021)'	dpff-1'	DPFF-1_SYS113.csv'	224	Protein Fusion'	/'
X. Ma et al., Nat. Methods 18, 893-902 (2021)'	dpl-1'	DPL-1_SYS120.csv'	211	Protein Fusion'	/'
X. Ma et al., Nat. Methods 18, 893-902 (2021)'	dsc-1'	DSC-1_SYS172.csv'	211	Protein Fusion'	/'
X. Ma et al., Nat. Methods 18, 893-902 (2021)'	duxl-1'	DUXL-1_SYS431.csv'	209	Protein Fusion'	/'
X. Ma et al., Nat. Methods 18, 893-902 (2021)'	dve-1'	DVE-1_SYS165.csv'	216	Protein Fusion'	/'
X. Ma et al., Nat. Methods 18, 893-902 (2021)'	efl-1'	EFL-1_SYS230.csv'	237	Protein Fusion'	/'
X. Ma et al., Nat. Methods 18, 893-902 (2021)'	efl-3'	EFL-3_SYS449.csv'	207	Protein Fusion'	/'
X. Ma et al., Nat. Methods 18, 893-902 (2021)'	egl-5'	EGL-5_RW10867.csv'	224	Protein Fusion'	/'
X. Ma et al., Nat. Methods 18, 893-902 (2021)'	egl-5'	EGL-5_SYS170.csv'	236	Protein Fusion'	/'
X. Ma et al., Nat. Methods 18, 893-902 (2021)'	egl-13'	EGL-13_SYS642.csv'	215	Protein Fusion'	/'
X. Ma et al., Nat. Methods 18, 893-902 (2021)'	egl-18'	EGL-18_SYS673.csv'	188	Protein Fusion'	/'
X. Ma et al., Nat. Methods 18, 893-902 (2021)'	egl-38'	EGL-38_SYS447.csv'	207	Protein Fusion'	/'
X. Ma et al., Nat. Methods 18, 893-902 (2021)'	egl-44'	EGL-44_SYS603.csv'	211	Protein Fusion'	/'
X. Ma et al., Nat. Methods 18, 893-902 (2021)'	egl-46'	EGL-46_SYS637.csv'	221	Protein Fusion'	/'
X. Ma et al., Nat. Methods 18, 893-902 (2021)'	egrh-1'	EGRH-1_SYS444.csv'	207	Protein Fusion'	/'
X. Ma et al., Nat. Methods 18, 893-902 (2021)'	elt-1'	ELT-1_SYS121.csv'	235	Protein Fusion'	/'
X. Ma et al., Nat. Methods 18, 893-902 (2021)'	elt-1'	ELT-1_SYS680.csv'	209	Protein Fusion'	/'
X. Ma et al., Nat. Methods 18, 893-902 (2021)'	elt-2'	ELT-2_RW10714.csv'	210	Protein Fusion'	/'
X. Ma et al., Nat. Methods 18, 893-902 (2021)'	elt-2'	ELT-2_SYS412.csv'	201	Protein Fusion'	/'
X. Ma et al., Nat. Methods 18, 893-902 (2021)'	elt-3'	ELT-3_SYS111.csv'	208	Protein Fusion'	/'
X. Ma et al., Nat. Methods 18, 893-902 (2021)'	elt-4'	ELT-4_SYS171.csv'	217	Protein Fusion'	/'
X. Ma et al., Nat. Methods 18, 893-902 (2021)'	elt-6'	ELT-6_SYS631.csv'	217	Protein Fusion'	/'
X. Ma et al., Nat. Methods 18, 893-902 (2021)'	elt-7'	ELT-7_SYS543.csv'	209	Protein Fusion'	/'
X. Ma et al., Nat. Methods 18, 893-902 (2021)'	end-1'	END-1_SYS549.csv'	207	Protein Fusion'	/'
X. Ma et al., Nat. Methods 18, 893-902 (2021)'	end-3'	END-3_SYS436.csv'	196	Protein Fusion'	/'
X. Ma et al., Nat. Methods 18, 893-902 (2021)'	eor-1'	EOR-1_RW10868.csv'	215	Protein Fusion'	/'
X. Ma et al., Nat. Methods 18, 893-902 (2021)'	eor-1'	EOR-1_SYS92.csv'	189	Protein Fusion'	/'
X. Ma et al., Nat. Methods 18, 893-902 (2021)'	ets-4'	ETS-4_SYS567.csv'	188	Protein Fusion'	/'
X. Ma et al., Nat. Methods 18, 893-902 (2021)'	ets-5'	ETS-5_SYS643.csv'	209	Protein Fusion'	/'
X. Ma et al., Nat. Methods 18, 893-902 (2021)'	ets-7'	ETS-7_SYS497.csv'	196	Protein Fusion'	/'
X. Ma et al., Nat. Methods 18, 893-902 (2021)'	ets-8'	ETS-8_SYS460.csv'	192	Protein Fusion'	/'
X. Ma et al., Nat. Methods 18, 893-902 (2021)'	ets-9'	ETS-9_SYS589.csv'	212	Protein Fusion'	/'
X. Ma et al., Nat. Methods 18, 893-902 (2021)'	eyg-1'	EYG-1_SYS275.csv'	214	Protein Fusion'	/'
X. Ma et al., Nat. Methods 18, 893-902 (2021)'	f19f10.1'	F19F10.1_SYS455.csv'	202	Protein Fusion'	/'
X. Ma et al., Nat. Methods 18, 893-902 (2021)'	snu-66'	F19F10.9_SYS423.csv'	191	Protein Fusion'	/'
X. Ma et al., Nat. Methods 18, 893-902 (2021)'	f23b12.7'	F23B12.7_SYS96.csv'	220	Protein Fusion'	/'
X. Ma et al., Nat. Methods 18, 893-902 (2021)'	f54f2.9'	F54F2.9_SYS572.csv'	208	Protein Fusion'	/'
X. Ma et al., Nat. Methods 18, 893-902 (2021)'	fax-1'	FAX-1_SYS747.csv'	212	Protein Fusion'	/'
X. Ma et al., Nat. Methods 18, 893-902 (2021)'	fkh-2'	FKH-2_SYS224.csv'	219	Protein Fusion'	/'
X. Ma et al., Nat. Methods 18, 893-902 (2021)'	fkh-3'	FKH-3_SYS551.csv'	203	Protein Fusion'	/'
X. Ma et al., Nat. Methods 18, 893-902 (2021)'	fkh-3'	FKH-3_SYS552.csv'	207	Protein Fusion'	/'
X. Ma et al., Nat. Methods 18, 893-902 (2021)'	fkh-4'	FKH-4_RW10914.csv'	223	Protein Fusion'	/'
X. Ma et al., Nat. Methods 18, 893-902 (2021)'	fkh-6'	FKH-6_SYS574.csv'	212	Protein Fusion'	/'
X. Ma et al., Nat. Methods 18, 893-902 (2021)'	fkh-8'	FKH-8_SYS496.csv'	207	Protein Fusion'	/'
X. Ma et al., Nat. Methods 18, 893-902 (2021)'	fkh-10'	FKH-10_SYS564.csv'	198	Protein Fusion'	/'
X. Ma et al., Nat. Methods 18, 893-902 (2021)'	fos-1'	FOS-1_SYS448.csv'	188	Protein Fusion'	/'
X. Ma et al., Nat. Methods 18, 893-902 (2021)'	gei-3'	GEI-3_SYS579.csv'	208	Protein Fusion'	/'
X. Ma et al., Nat. Methods 18, 893-902 (2021)'	gmeb-1'	GMEB-1_SYS575.csv'	218	Protein Fusion'	/'
X. Ma et al., Nat. Methods 18, 893-902 (2021)'	gmeb-2'	GMEB-2_SYS452.csv'	210	Protein Fusion'	/'
X. Ma et al., Nat. Methods 18, 893-902 (2021)'	gmeb-3'	GMEB-3_SYS647.csv'	212	Protein Fusion'	/'
X. Ma et al., Nat. Methods 18, 893-902 (2021)'	ham-2'	HAM-2_SYS553.csv'	209	Protein Fusion'	/'
X. Ma et al., Nat. Methods 18, 893-902 (2021)'	hbl-1'	HBL-1_SYS641.csv'	233	Protein Fusion'	/'
X. Ma et al., Nat. Methods 18, 893-902 (2021)'	hlh-2'	HLH-2_SYS1049.csv'	205	Protein Fusion'	/'
X. Ma et al., Nat. Methods 18, 893-902 (2021)'	hlh-3'	HLH-3_SYS222.csv'	224	Protein Fusion'	/'
X. Ma et al., Nat. Methods 18, 893-902 (2021)'	hlh-4'	HLH-4_SYS110.csv'	205	Protein Fusion'	/'
X. Ma et al., Nat. Methods 18, 893-902 (2021)'	hlh-8'	HLH-8_SYS160.csv'	221	Protein Fusion'	/'
X. Ma et al., Nat. Methods 18, 893-902 (2021)'	hlh-11'	HLH-11_SYS421.csv'	200	Protein Fusion'	/'
X. Ma et al., Nat. Methods 18, 893-902 (2021)'	hlh-12'	HLH-12_SYS584.csv'	182	Protein Fusion'	/'
X. Ma et al., Nat. Methods 18, 893-902 (2021)'	hlh-14'	HLH-14_SYS461.csv'	210	Protein Fusion'	/'
X. Ma et al., Nat. Methods 18, 893-902 (2021)'	hlh-15'	HLH-15_SYS593.csv'	212	Protein Fusion'	/'
X. Ma et al., Nat. Methods 18, 893-902 (2021)'	hlh-17'	HLH-17_SYS585.csv'	196	Protein Fusion'	/'
X. Ma et al., Nat. Methods 18, 893-902 (2021)'	hlh-25'	HLH-25_SYS479.csv'	213	Protein Fusion'	/'
X. Ma et al., Nat. Methods 18, 893-902 (2021)'	hlh-30'	HLH-30_SYS82.csv'	195	Protein Fusion'	/'
X. Ma et al., Nat. Methods 18, 893-902 (2021)'	hmbx-1'	HMBX-1_SYS178.csv'	238	Protein Fusion'	/'
X. Ma et al., Nat. Methods 18, 893-902 (2021)'	hmg-3'	HMG-3_SYS554.csv'	208	Protein Fusion'	/'
X. Ma et al., Nat. Methods 18, 893-902 (2021)'	hmg-4'	HMG-4_SYS226.csv'	236	Protein Fusion'	/'
X. Ma et al., Nat. Methods 18, 893-902 (2021)'	hmg-20'	HMG-20_SYS477.csv'	201	Protein Fusion'	/'
X. Ma et al., Nat. Methods 18, 893-902 (2021)'	hnd-1'	HND-1_SYS676.csv'	197	Protein Fusion'	/'
X. Ma et al., Nat. Methods 18, 893-902 (2021)'	irx-1'	IRX-1_SYS84.csv'	198	Protein Fusion'	/'
X. Ma et al., Nat. Methods 18, 893-902 (2021)'	k09a11.1'	K09A11.1_SYS273.csv'	206	Protein Fusion'	/'
X. Ma et al., Nat. Methods 18, 893-902 (2021)'	k10b3.5'	K10B3.5_SYS582.csv'	197	Protein Fusion'	/'
X. Ma et al., Nat. Methods 18, 893-902 (2021)'	klf-3'	KLF-3_SYS512.csv'	208	Protein Fusion'	/'
X. Ma et al., Nat. Methods 18, 893-902 (2021)'	klf-3'	KLF-3_SYS1055.csv'	217	Protein Fusion'	/'
X. Ma et al., Nat. Methods 18, 893-902 (2021)'	lag-1'	LAG-1_SYS671.csv'	208	Protein Fusion'	/'
X. Ma et al., Nat. Methods 18, 893-902 (2021)'	let-381'	LET-381_SYS668.csv'	211	Protein Fusion'	/'
X. Ma et al., Nat. Methods 18, 893-902 (2021)'	lim-4'	LIM-4_SYS225.csv'	222	Protein Fusion'	/'
X. Ma et al., Nat. Methods 18, 893-902 (2021)'	lim-6'	LIM-6_SYS95.csv'	198	Protein Fusion'	/'
X. Ma et al., Nat. Methods 18, 893-902 (2021)'	lim-6'	LIM-6_SYS1052.csv'	210	Protein Fusion'	/'
X. Ma et al., Nat. Methods 18, 893-902 (2021)'	lim-7'	LIM-7_SYS473.csv'	227	Protein Fusion'	/'
X. Ma et al., Nat. Methods 18, 893-902 (2021)'	lin-1'	LIN-1_SYS645.csv'	213	Protein Fusion'	/'
X. Ma et al., Nat. Methods 18, 893-902 (2021)'	lin-11'	LIN-11_RW10493.csv'	211	Protein Fusion'	/'
X. Ma et al., Nat. Methods 18, 893-902 (2021)'	lin-13'	LIN-13_RW10560.csv'	186	Protein Fusion'	/'
X. Ma et al., Nat. Methods 18, 893-902 (2021)'	lin-15b'	LIN-15B_SYS147.csv'	216	Protein Fusion'	/'
X. Ma et al., Nat. Methods 18, 893-902 (2021)'	lin-22'	LIN-22_SYS1050.csv'	228	Protein Fusion'	/'
X. Ma et al., Nat. Methods 18, 893-902 (2021)'	lin-26'	LIN-26_SYS513.csv'	209	Protein Fusion'	/'
X. Ma et al., Nat. Methods 18, 893-902 (2021)'	lin-31'	LIN-31_SYS683.csv'	193	Protein Fusion'	/'
X. Ma et al., Nat. Methods 18, 893-902 (2021)'	lin-32'	LIN-32_SYS398.csv'	210	Protein Fusion'	/'
X. Ma et al., Nat. Methods 18, 893-902 (2021)'	lin-39'	LIN-39_RW10349.csv'	207	Protein Fusion'	/'
X. Ma et al., Nat. Methods 18, 893-902 (2021)'	lin-39'	LIN-39_RW10350.csv'	222	Protein Fusion'	/'
X. Ma et al., Nat. Methods 18, 893-902 (2021)'	lin-48'	LIN-48_SYS638.csv'	219	Protein Fusion'	/'
X. Ma et al., Nat. Methods 18, 893-902 (2021)'	lsl-1'	LSL-1_SYS419.csv'	210	Protein Fusion'	/'
X. Ma et al., Nat. Methods 18, 893-902 (2021)'	lsy-2'	LSY-2_SYS105.csv'	196	Protein Fusion'	/'
X. Ma et al., Nat. Methods 18, 893-902 (2021)'	m03d4.4'	M03D4.4_SYS453.csv'	220	Protein Fusion'	/'
X. Ma et al., Nat. Methods 18, 893-902 (2021)'	mab-9'	MAB-9_SYS610.csv'	215	Protein Fusion'	/'
X. Ma et al., Nat. Methods 18, 893-902 (2021)'	mbf-1'	MBF-1_SYS545.csv'	217	Protein Fusion'	/'
X. Ma et al., Nat. Methods 18, 893-902 (2021)'	mbf-1'	MBF-1_SYS546.csv'	194	Protein Fusion'	/'
X. Ma et al., Nat. Methods 18, 893-902 (2021)'	mbf-1'	MBF-1_SYS562.csv'	200	Protein Fusion'	/'
X. Ma et al., Nat. Methods 18, 893-902 (2021)'	mdl-1'	MDL-1_SYS103.csv'	228	Protein Fusion'	/'
X. Ma et al., Nat. Methods 18, 893-902 (2021)'	mec-3'	MEC-3_SYS71.csv'	205	Protein Fusion'	/'
X. Ma et al., Nat. Methods 18, 893-902 (2021)'	med-1'	MED-1_SYS433.csv'	182	Protein Fusion'	/'
X. Ma et al., Nat. Methods 18, 893-902 (2021)'	med-1'	MED-1_SYS595.csv'	212	Protein Fusion'	/'
X. Ma et al., Nat. Methods 18, 893-902 (2021)'	med-2'	MED-2_RW10479.csv'	223	Protein Fusion'	/'
X. Ma et al., Nat. Methods 18, 893-902 (2021)'	mef-2'	MEF-2_SYS590.csv'	213	Protein Fusion'	/'
X. Ma et al., Nat. Methods 18, 893-902 (2021)'	mep-1'	MEP-1_SYS83.csv'	183	Protein Fusion'	/'
X. Ma et al., Nat. Methods 18, 893-902 (2021)'	mls-1'	MLS-1_SYS616.csv'	203	Protein Fusion'	/'
X. Ma et al., Nat. Methods 18, 893-902 (2021)'	mls-2'	MLS-2_SYS221.csv'	220	Protein Fusion'	/'
X. Ma et al., Nat. Methods 18, 893-902 (2021)'	mml-1'	MML-1_SYS450.csv'	220	Protein Fusion'	/'
X. Ma et al., Nat. Methods 18, 893-902 (2021)'	nfi-1'	NFI-1_SYS526.csv'	195	Protein Fusion'	/'
X. Ma et al., Nat. Methods 18, 893-902 (2021)'	nfya-1'	NFYA-1_SYS166.csv'	206	Protein Fusion'	/'
X. Ma et al., Nat. Methods 18, 893-902 (2021)'	nfyc-1'	NFYC-1_SYS678.csv'	197	Protein Fusion'	/'
X. Ma et al., Nat. Methods 18, 893-902 (2021)'	ngn-1'	NGN-1_SYS498.csv'	206	Protein Fusion'	/'
X. Ma et al., Nat. Methods 18, 893-902 (2021)'	nhr-6'	NHR-6_SYS577.csv'	219	Protein Fusion'	/'
X. Ma et al., Nat. Methods 18, 893-902 (2021)'	nhr-10'	NHR-10_SYS576.csv'	205	Protein Fusion'	/'
X. Ma et al., Nat. Methods 18, 893-902 (2021)'	nhr-12'	NHR-12_SYS93.csv'	198	Protein Fusion'	/'
X. Ma et al., Nat. Methods 18, 893-902 (2021)'	nhr-23'	NHR-23_SYS87.csv'	217	Protein Fusion'	/'
X. Ma et al., Nat. Methods 18, 893-902 (2021)'	nhr-35'	NHR-35_SYS528.csv'	219	Protein Fusion'	/'
X. Ma et al., Nat. Methods 18, 893-902 (2021)'	nhr-49'	NHR-49_SYS696.csv'	201	Protein Fusion'	/'
X. Ma et al., Nat. Methods 18, 893-902 (2021)'	nhr-67'	NHR-67_SYS94.csv'	210	Protein Fusion'	/'
X. Ma et al., Nat. Methods 18, 893-902 (2021)'	nhr-76'	NHR-76_SYS558.csv'	206	Protein Fusion'	/'
X. Ma et al., Nat. Methods 18, 893-902 (2021)'	nhr-85'	NHR-85_SYS594.csv'	201	Protein Fusion'	/'
X. Ma et al., Nat. Methods 18, 893-902 (2021)'	nhr-102'	NHR-102_SYS276.csv'	199	Protein Fusion'	/'
X. Ma et al., Nat. Methods 18, 893-902 (2021)'	nhr-127'	NHR-127_SYS392.csv'	198	Protein Fusion'	/'
X. Ma et al., Nat. Methods 18, 893-902 (2021)'	nhr-186'	NHR-186_SYS583.csv'	217	Protein Fusion'	/'
X. Ma et al., Nat. Methods 18, 893-902 (2021)'	nhr-232'	NHR-232_SYS395.csv'	205	Protein Fusion'	/'
X. Ma et al., Nat. Methods 18, 893-902 (2021)'	nob-1'	NOB-1_SYS724.csv'	202	Protein Fusion'	/'
X. Ma et al., Nat. Methods 18, 893-902 (2021)'	npax-4'	NPAX-4_SYS586.csv'	197	Protein Fusion'	/'
X. Ma et al., Nat. Methods 18, 893-902 (2021)'	odd-2'	ODD-2_SYS420.csv'	180	Protein Fusion'	/'
X. Ma et al., Nat. Methods 18, 893-902 (2021)'	pag-3'	PAG-3_SYS446.csv'	232	Protein Fusion'	/'
X. Ma et al., Nat. Methods 18, 893-902 (2021)'	pal-1'	PAL-1_RW10993.csv'	192	Protein Fusion'	/'
X. Ma et al., Nat. Methods 18, 893-902 (2021)'	pax-1'	PAX-1_SYS104.csv'	213	Protein Fusion'	/'
X. Ma et al., Nat. Methods 18, 893-902 (2021)'	pax-3'	PAX-3_SYS142.csv'	201	Protein Fusion'	/'
X. Ma et al., Nat. Methods 18, 893-902 (2021)'	pes-1'	PES-1_SYS646.csv'	197	Protein Fusion'	/'
X. Ma et al., Nat. Methods 18, 893-902 (2021)'	pha-2'	PHA-2_SYS531.csv'	206	Protein Fusion'	/'
X. Ma et al., Nat. Methods 18, 893-902 (2021)'	pha-4'	PHA-4_RW10425.csv'	246	Protein Fusion'	/'
X. Ma et al., Nat. Methods 18, 893-902 (2021)'	php-3'	PHP-3_SYS1013.csv'	216	Protein Fusion'	/'
X. Ma et al., Nat. Methods 18, 893-902 (2021)'	pop-1'	POP-1_SYS88.csv'	213	Protein Fusion'	/'
X. Ma et al., Nat. Methods 18, 893-902 (2021)'	pqm-1'	PQM-1_SYS573.csv'	212	Protein Fusion'	/'
X. Ma et al., Nat. Methods 18, 893-902 (2021)'	pros-1'	PROS-1_SYS176.csv'	222	Protein Fusion'	/'
X. Ma et al., Nat. Methods 18, 893-902 (2021)'	rcor-1'	RCOR-1_SYS667.csv'	205	Protein Fusion'	/'
X. Ma et al., Nat. Methods 18, 893-902 (2021)'	ref-1'	REF-1_SYS499.csv'	221	Protein Fusion'	/'
X. Ma et al., Nat. Methods 18, 893-902 (2021)'	ref-2'	REF-2_SYS109.csv'	218	Protein Fusion'	/'
X. Ma et al., Nat. Methods 18, 893-902 (2021)'	rnt-1'	RNT-1_SYS140.csv'	229	Protein Fusion'	/'
X. Ma et al., Nat. Methods 18, 893-902 (2021)'	sdz-38'	SDZ-38_SYS394.csv'	198	Protein Fusion'	/'
X. Ma et al., Nat. Methods 18, 893-902 (2021)'	sea-1'	SEA-1_SYS560.csv'	197	Protein Fusion'	/'
X. Ma et al., Nat. Methods 18, 893-902 (2021)'	sel-8'	SEL-8_SYS604.csv'	206	Protein Fusion'	/'
X. Ma et al., Nat. Methods 18, 893-902 (2021)'	sem-2'	SEM-2_SYS115.csv'	204	Protein Fusion'	/'
X. Ma et al., Nat. Methods 18, 893-902 (2021)'	sem-2'	SEM-2_SYS227.csv'	231	Protein Fusion'	/'
X. Ma et al., Nat. Methods 18, 893-902 (2021)'	sem-4'	SEM-4_SYS617.csv'	219	Protein Fusion'	/'
X. Ma et al., Nat. Methods 18, 893-902 (2021)'	skn-1'	SKN-1_SYS81.csv'	201	Protein Fusion'	/'
X. Ma et al., Nat. Methods 18, 893-902 (2021)'	skn-1'	SKN-1_SYS515.csv'	219	Protein Fusion'	/'
X. Ma et al., Nat. Methods 18, 893-902 (2021)'	sma-2'	SMA-2_SYS602.csv'	212	Protein Fusion'	/'
X. Ma et al., Nat. Methods 18, 893-902 (2021)'	snai-1'	SNAI-1_SYS591.csv'	202	Protein Fusion'	/'
X. Ma et al., Nat. Methods 18, 893-902 (2021)'	sox-2'	SOX-2_SYS516.csv'	218	Protein Fusion'	/'
X. Ma et al., Nat. Methods 18, 893-902 (2021)'	sox-4'	SOX-4_SYS418.csv'	211	Protein Fusion'	/'
X. Ma et al., Nat. Methods 18, 893-902 (2021)'	spr-4'	SPR-4_SYS475.csv'	205	Protein Fusion'	/'
X. Ma et al., Nat. Methods 18, 893-902 (2021)'	sptf-1'	SPTF-1_SYS112.csv'	238	Protein Fusion'	/'
X. Ma et al., Nat. Methods 18, 893-902 (2021)'	svh-5'	SVH-5_SYS639.csv'	196	Protein Fusion'	/'
X. Ma et al., Nat. Methods 18, 893-902 (2021)'	swsn-7'	SWSN-7_SYS100.csv'	213	Protein Fusion'	/'
X. Ma et al., Nat. Methods 18, 893-902 (2021)'	syd-9'	SYD-9_SYS587.csv'	200	Protein Fusion'	/'
X. Ma et al., Nat. Methods 18, 893-902 (2021)'	syd-9'	SYD-9_SYS615.csv'	200	Protein Fusion'	/'
X. Ma et al., Nat. Methods 18, 893-902 (2021)'	t07f8.4'	T07F8.4_SYS98.csv'	197	Protein Fusion'	/'
X. Ma et al., Nat. Methods 18, 893-902 (2021)'	tsct-1'	T18D3.7_SYS547.csv'	200	Protein Fusion'	/'
X. Ma et al., Nat. Methods 18, 893-902 (2021)'	tsct-1'	T18D3.7_SYS557.csv'	227	Protein Fusion'	/'
X. Ma et al., Nat. Methods 18, 893-902 (2021)'	tab-1'	TAB-1_SYS674.csv'	196	Protein Fusion'	/'
X. Ma et al., Nat. Methods 18, 893-902 (2021)'	tag-68'	TAG-68_SYS556.csv'	200	Protein Fusion'	/'
X. Ma et al., Nat. Methods 18, 893-902 (2021)'	tbx-2'	TBX-2_SYS143.csv'	173	Protein Fusion'	/'
X. Ma et al., Nat. Methods 18, 893-902 (2021)'	tbx-7'	TBX-7_SYS106.csv'	241	Protein Fusion'	/'
X. Ma et al., Nat. Methods 18, 893-902 (2021)'	tbx-8'	TBX-8_RW10558.csv'	214	Protein Fusion'	/'
X. Ma et al., Nat. Methods 18, 893-902 (2021)'	tbx-9'	TBX-9_SYS229.csv'	235	Protein Fusion'	/'
X. Ma et al., Nat. Methods 18, 893-902 (2021)'	tbx-9'	TBX-9_SYS231.csv'	223	Protein Fusion'	/'
X. Ma et al., Nat. Methods 18, 893-902 (2021)'	tbx-11'	TBX-11_SYS150.csv'	204	Protein Fusion'	/'
X. Ma et al., Nat. Methods 18, 893-902 (2021)'	tbx-35'	TBX-35_SYS686.csv'	205	Protein Fusion'	/'
X. Ma et al., Nat. Methods 18, 893-902 (2021)'	tbx-36'	TBX-36_SYS559.csv'	201	Protein Fusion'	/'
X. Ma et al., Nat. Methods 18, 893-902 (2021)'	tbx-37'	TBX-37_SYS400.csv'	221	Protein Fusion'	/'
X. Ma et al., Nat. Methods 18, 893-902 (2021)'	tbx-38'	TBX-38_SYS422.csv'	225	Protein Fusion'	/'
X. Ma et al., Nat. Methods 18, 893-902 (2021)'	tlp-1'	TLP-1_SYS107.csv'	217	Protein Fusion'	/'
X. Ma et al., Nat. Methods 18, 893-902 (2021)'	ttx-1'	TTX-1_SYS644.csv'	215	Protein Fusion'	/'
X. Ma et al., Nat. Methods 18, 893-902 (2021)'	ttx-3'	TTX-3_RW10713.csv'	187	Protein Fusion'	/'
X. Ma et al., Nat. Methods 18, 893-902 (2021)'	unc-3'	UNC-3_SYS70.csv'	226	Protein Fusion'	/'
X. Ma et al., Nat. Methods 18, 893-902 (2021)'	unc-3'	UNC-3_SYS148.csv'	228	Protein Fusion'	/'
X. Ma et al., Nat. Methods 18, 893-902 (2021)'	unc-4'	UNC-4_SYS652.csv'	205	Protein Fusion'	/'
X. Ma et al., Nat. Methods 18, 893-902 (2021)'	unc-30'	UNC-30_SYS69.csv'	202	Protein Fusion'	/'
X. Ma et al., Nat. Methods 18, 893-902 (2021)'	unc-30'	UNC-30_SYS743.csv'	203	Protein Fusion'	/'
X. Ma et al., Nat. Methods 18, 893-902 (2021)'	unc-37'	UNC-37_SYS681.csv'	186	Protein Fusion'	/'
X. Ma et al., Nat. Methods 18, 893-902 (2021)'	unc-39'	UNC-39_SYS174.csv'	208	Protein Fusion'	/'
X. Ma et al., Nat. Methods 18, 893-902 (2021)'	unc-42'	UNC-42_SYS86.csv'	222	Protein Fusion'	/'
X. Ma et al., Nat. Methods 18, 893-902 (2021)'	unc-55'	UNC-55_SYS749.csv'	206	Protein Fusion'	/'
X. Ma et al., Nat. Methods 18, 893-902 (2021)'	unc-62'	UNC-62_SYS116.csv'	221	Protein Fusion'	/'
X. Ma et al., Nat. Methods 18, 893-902 (2021)'	unc-86'	UNC-86_SYS68.csv'	211	Protein Fusion'	/'
X. Ma et al., Nat. Methods 18, 893-902 (2021)'	unc-120'	UNC-120_SYS167.csv'	228	Protein Fusion'	/'
X. Ma et al., Nat. Methods 18, 893-902 (2021)'	unc-130'	UNC-130_RW11144.csv'	192	Protein Fusion'	/'
X. Ma et al., Nat. Methods 18, 893-902 (2021)'	vab-3'	VAB-3_SYS633.csv'	213	Protein Fusion'	/'
X. Ma et al., Nat. Methods 18, 893-902 (2021)'	vab-7'	VAB-7_SYS510.csv'	207	Protein Fusion'	/'
X. Ma et al., Nat. Methods 18, 893-902 (2021)'	vab-15'	VAB-15_SYS223.csv'	221	Protein Fusion'	/'
X. Ma et al., Nat. Methods 18, 893-902 (2021)'	y48g1c.6'	Y48G1C.6_SYS485.csv'	228	Protein Fusion'	/'
X. Ma et al., Nat. Methods 18, 893-902 (2021)'	znf-782'	Y55F3AM.14_SYS597.csv'	219	Protein Fusion'	/'
X. Ma et al., Nat. Methods 18, 893-902 (2021)'	y56a3a.28'	Y56A3A.28_SYS508.csv'	215	Protein Fusion'	/'
X. Ma et al., Nat. Methods 18, 893-902 (2021)'	y73e7a.1'	Y73E7A.1_SYS714.csv'	198	Protein Fusion'	/'
X. Ma et al., Nat. Methods 18, 893-902 (2021)'	y75b8a.6'	Y75B8A.6_SYS80.csv'	220	Protein Fusion'	/'
X. Ma et al., Nat. Methods 18, 893-902 (2021)'	zag-1'	ZAG-1_SYS102.csv'	205	Protein Fusion'	/'
X. Ma et al., Nat. Methods 18, 893-902 (2021)'	zfh-2'	ZFH-2_SYS986.csv'	210	Protein Fusion'	/'
X. Ma et al., Nat. Methods 18, 893-902 (2021)'	zip-3'	ZIP-3_SYS669.csv'	199	Protein Fusion'	/'
X. Ma et al., Nat. Methods 18, 893-902 (2021)'	zip-8'	ZIP-8_SYS163.csv'	227	Protein Fusion'	/'
X. Ma et al., Nat. Methods 18, 893-902 (2021)'	zip-8'	ZIP-8_SYS454.csv'	216	Protein Fusion'	/'
X. Ma et al., Nat. Methods 18, 893-902 (2021)'	ztf-6'	ZTF-6_SYS464.csv'	184	Protein Fusion'	/'
X. Ma et al., Nat. Methods 18, 893-902 (2021)'	ztf-11'	ZTF-11_SYS99.csv'	222	Protein Fusion'	/'
X. Ma et al., Nat. Methods 18, 893-902 (2021)'	ztf-30'	ZTF-30_SYS164.csv'	233	Protein Fusion'	/'
L. Chen et al., Genetics 209, 37-49 (2018)'	lag-2'	CD161208LAG2p1.csv'	150	Promoter Fusion'	/'
L. Chen et al., Genetics 209, 37-49 (2018)'	lag-2'	CD161208LAG2p2.csv'	150	Promoter Fusion'	/'
L. Chen et al., Genetics 209, 37-49 (2018)'	lin-12'	CD151025LIN12p1.csv'	150	Promoter Fusion'	Notch Receptor'
L. Chen et al., Genetics 209, 37-49 (2018)'	lin-12'	CD151025LIN12p2.csv'	150	Promoter Fusion'	Notch Receptor'
L. Chen et al., Genetics 209, 37-49 (2018)'	glp-1'	CD151117GLP1p1.csv'	170	Promoter Fusion'	Notch Receptor'
L. Chen et al., Genetics 209, 37-49 (2018)'	glp-1'	CD151117GLP1p2.csv'	160	Promoter Fusion'	Notch Receptor'
L. Chen et al., Genetics 209, 37-49 (2018)'	apx-1'	CD161212APX1p1.csv'	165	Promoter Fusion'	Notch Ligand'
L. Chen et al., Genetics 209, 37-49 (2018)'	apx-1'	CD161212APX1p2.csv'	165	Promoter Fusion'	Notch Ligand'
This paper'	apx-1'	CD151209APX1p3.csv'	180	Promoter Fusion'	Notch Ligand'
This paper'	lag-2'	CD210809LAG2p2.csv'	160	Promoter Fusion'	Notch Ligand'
This paper'	lag-2'	CD210809LAG2p3.csv'	210	Promoter Fusion'	Notch Ligand'
This paper'	mom-5'	CD160415MOM5p2.csv'	155	Promoter Fusion'	Wnt Receptor'
This paper'	mom-5'	CD160415MOM5p3.csv'	180	Promoter Fusion'	Wnt Receptor'
This paper'	mig-1'	CD160516MIG1p1.csv'	150	Promoter Fusion'	Wnt Receptor'
This paper'	mig-1'	CD160516MIG1p2.csv'	150	Promoter Fusion'	Wnt Receptor'
This paper'	cfz-2'	CD180213CFZ2p1.csv'	150	Promoter Fusion'	Wnt Receptor'
This paper'	cfz-2'	CD180213CFZ2p2.csv'	170	Promoter Fusion'	Wnt Receptor'
This paper'	mom-2'	CD161202MOM2p2.csv'	228	Promoter Fusion'	Wnt Ligand'
This paper'	mom-2'	CD161202MOM2p3.csv'	160	Promoter Fusion'	Wnt Ligand'
This paper'	cwn-2'	CD170330CWN2p1.csv'	160	Promoter Fusion'	Wnt Ligand'
This paper'	cwn-2'	CD170330CWN2p3.csv'	165	Promoter Fusion'	Wnt Ligand'
This paper'	tads-1'	CD150609TADS1p2.csv'	150	Protein Fusion'	Profiled for the first time.'
This paper'	snfc-5'	CD170725SNFC5p1.csv'	170	Protein Fusion'	Profiled for the first time.'
This paper'	attf-2'	CD130112f09g2-9p2.csv'	140	Promoter Fusion'	/'
This paper'	hlh-1'	CD120926HLH1p1.csv'	140	Protein Fusion'	/'
This paper'	hlh-1'	CD120926HLH1p4.csv'	140	Protein Fusion'	/'
This paper'	hlh-1'	CD140205HLH1p1.csv'	145	Protein Fusion'	/'
This paper'	hlh-1'	CD140205HLH1p2.csv'	150	Protein Fusion'	/'
This paper'	hlh-1'	CD140205HLH1p3.csv'	140	Protein Fusion'	/'
This paper'	hlh-1'	CD140206HLH1p1.csv'	135	Protein Fusion'	/'
This paper'	hlh-1'	CD140206HLH1p2.csv'	140	Protein Fusion'	/'
This paper'	hlh-1'	CD140206HLH1p3.csv'	135	Protein Fusion'	/'
This paper'	hlh-1'	CD140207HLH1p1.csv'	145	Protein Fusion'	/'
This paper'	hlh-1'	CD140207HLH1p2.csv'	140	Protein Fusion'	/'
This paper'	hlh-1'	CD140207HLH1p3.csv'	135	Protein Fusion'	/'
This paper'	lin-12'	CD151025LIN12p1.csv'	150	Promoter Fusion'	/'
This paper'	lin-12'	CD151025LIN12p2.csv'	150	Promoter Fusion'	/'
This paper'	glp-1'	CD140502glp1p1.csv'	145	Promoter Fusion'	/'
This paper'	glp-1'	CD140502glp1p3.csv'	145	Promoter Fusion'	/'
This paper'	mom-2'	CD161118MOM2p2.csv'	145	Promoter Fusion'	/'
This paper'	mom-2'	CD161118MOM2p3.csv'	150	Promoter Fusion'	/'
This paper'	cnd-1'	CD140206CND1p1.csv'	140	Protein Fusion'	/'
This paper'	cnd-1'	CD140206CND1p2.csv'	140	Protein Fusion'	/'
This paper'	cnd-1'	CD140206CND1p3.csv'	155	Protein Fusion'	/'
This paper'	lag-1'	CD170106LAG1p1.csv'	170	Promoter Fusion'	/'
This paper'	lag-1'	CD170106LAG1p2.csv'	140	Promoter Fusion'	/'
This paper'	lag-1'	CD170106LAG1p3.csv'	170	Promoter Fusion'	/'
This paper'	pha-4'	CD120710pha4p3.csv'	130	Promoter Fusion'	/'
This paper'	pha-4'	CD120925PHA4p1.csv'	160	Protein Fusion'	/'
This paper'	pha-4'	CD120925PHA4p2.csv'	135	Protein Fusion'	/'
This paper'	pha-4'	CD120925PHA4p3.csv'	155	Protein Fusion'	/'
This paper'	pha-4'	CD120925PHA4p4.csv'	155	Protein Fusion'	/'
This paper'	pha-4'	CD130108PHA4p1.csv'	190	Protein Fusion'	/'
This paper'	pha-4'	CD130108PHA4p2.csv'	140	Protein Fusion'	/'
This paper'	pha-4'	CD130108PHA4p3.csv'	165	Protein Fusion'	/'
This paper'	pha-4'	CD130311PHA4p1.csv'	150	Protein Fusion'	/'
This paper'	pha-4'	CD130311PHA4p2.csv'	150	Protein Fusion'	/'
This paper'	pha-4'	CD130311PHA4p3.csv'	140	Protein Fusion'	/'
This paper'	pha-4'	CD130603PHA4p1.csv'	160	Protein Fusion'	/'
This paper'	pha-4'	CD130619PHA4p2.csv'	150	Protein Fusion'	/'
This paper'	pha-4'	CD130619PHA4p3.csv'	170	Protein Fusion'	/'
This paper'	pha-4'	CD130717PHA4p2.csv'	160	Protein Fusion'	/'
This paper'	pha-4'	CD130724PHA4p1.csv'	150	Protein Fusion'	/'
This paper'	pha-4'	CD130815PHA4p2.csv'	140	Protein Fusion'	/'
This paper'	pha-4'	CD130815PHA4p3.csv'	220	Protein Fusion'	/'
This paper'	pha-4'	CD130826PHA4p1.csv'	200	Protein Fusion'	/'
This paper'	pha-4'	CD130826PHA4p2.csv'	200	Protein Fusion'	/'
This paper'	pha-4'	CD130826PHA4p3.csv'	220	Protein Fusion'	/'
This paper'	pha-4'	CD131002PHA4p2.csv'	150	Protein Fusion'	/'
This paper'	pha-4'	CD131002PHA4p3.csv'	160	Protein Fusion'	/'
This paper'	pha-4'	CD131015PHA4p1.csv'	150	Protein Fusion'	/'
This paper'	pha-4'	CD131015PHA4p2.csv'	150	Protein Fusion'	/'
This paper'	pha-4'	CD131210PHA4p1.csv'	170	Protein Fusion'	/'
This paper'	pha-4'	CD131210PHA4p3.csv'	165	Protein Fusion'	/'
This paper'	pha-4'	CD140307PHA4p1.csv'	200	Protein Fusion'	/'
This paper'	pha-4'	CD140519PHA4p2.csv'	160	Protein Fusion'	/'
This paper'	pha-4'	CD140526PHA4p1.csv'	140	Protein Fusion'	/'
This paper'	pha-4'	CD140723PHA4p2.csv'	140	Protein Fusion'	/'
This paper'	pha-4'	CD140917PHA4p1.csv'	145	Protein Fusion'	/'
This paper'	pha-4'	CD140919PHA4p1.csv'	150	Protein Fusion'	/'
This paper'	pha-4'	CD140922PHA4p1.csv'	150	Protein Fusion'	/'
This paper'	pha-4'	CD141006PHA4p1.csv'	135	Protein Fusion'	/'
This paper'	pha-4'	CD170605PHA4p2.csv'	140	Protein Fusion'	/'
This paper'	ref-1'	CD160822ref1p2.csv'	150	Promoter Fusion'	/'
This paper'	ref-1'	CD160926ref1p1.csv'	140	Promoter Fusion'	/'
This paper'	ref-1'	CD160926ref1p2.csv'	145	Promoter Fusion'	/'
This paper'	tbx-8'	CD151127TBX8p1.csv'	140	Promoter Fusion'	/'
This paper'	tbx-8'	CD140404TBX8p2.csv'	155	Protein Fusion'	/'
This paper'	tbx-8'	CD141023TBX8p1.csv'	160	Protein Fusion'	/'
This paper'	nhr-57'	CD121129nhr57p1.csv'	145	Promoter Fusion'	/'
This paper'	nhr-171'	CD121201nhr171p1.csv'	135	Promoter Fusion'	/'
This paper'	nhr-171'	CD121201nhr171p3.csv'	150	Promoter Fusion'	/'
This paper'	moe-3'	CD130111moe3p2.csv'	145	Promoter Fusion'	/'
This paper'	ceh-26'	CD140603CEH26p1.csv'	150	Protein Fusion'	/'
This paper'	ceh-26'	CD140603CEH26p2.csv'	150	Protein Fusion'	/'
This paper'	ceh-26'	CD140605CEH26p1.csv'	140	Protein Fusion'	/'
This paper'	ceh-26'	CD140605CEH26p2.csv'	160	Protein Fusion'	/'
This paper'	ceh-26'	CD140609CEH26p1.csv'	170	Protein Fusion'	/'
This paper'	ceh-26'	CD140609CEH26p2.csv'	160	Protein Fusion'	/'
This paper'	ceh-26'	CD140617CEH26p1.csv'	150	Protein Fusion'	/'
This paper'	ceh-26'	CD140617CEH26p2.csv'	190	Protein Fusion'	/'
This paper'	egl-1'	CD140609EGL1p1.csv'	160	Promoter Fusion'	/'
This paper'	egl-1'	CD140609EGL1p2.csv'	200	Promoter Fusion'	/'
This paper'	egl-1'	CD140615EGL1p1.csv'	240	Promoter Fusion'	/'
This paper'	egl-1'	CD140616EGL1p3.csv'	230	Promoter Fusion'	/'
Note 1: The embryo with labeling on the gene involved in the Notch signaling pathway and used for interacting cell pair identification in this paper is remarked on right. The embryo with labeling on the gene involved in the Wnt signaling pathway is remarked on right
