# Supplementary material for: Cell lineage-resolved embryonic morphological map reveals novel signaling regulating cell fate and size asymmetry
Source: Research Square preprint supplement (doi:10.21203/rs.3.rs-4664717/v1), 2024-08-30
Supplement: Supplementary file 13 [file Table S2.xlsx]

## Sheet: Table S
Embryo sample	Computational time for 3D cellular morphology reconstruction (minute)
WT_Sample1	179.8
WT_Sample2	288.03
WT_Sample3	148.6
WT_Sample4	169.85
WT_Sample5	158.7
WT_Sample6	192.75
WT_Sample7	175.78
WT_Sample8	169.67
Note 1: The computational time is obtained by processing all the 3D images from the first imaging time point to the first time point when the total cell number exceeds 550.
