# Supplementary material for: Cell lineage-resolved embryonic morphological map reveals novel signaling regulating cell fate and size asymmetry
Source: Research Square preprint supplement (doi:10.21203/rs.3.rs-4664717/v1), 2024-08-30
Supplement: Supplementary file 15 [file Table S3.xlsx]

## Sheet: Table S
Embryo sample	Imaging time point	Edited time point	Total cell number at terminal edited time point	x resolution (μm)	y resolution (μm)	z resolution (μm)	Time resolution (min)	Total pixel/focal plane number in x/y/zdirection	Manually annotated or not?
WT_Sample1	280	255	581	0.09	0.09	0.42	1.443	712/512/92	Yes
WT_Sample2	270	195	576	0.09	0.09	0.42	1.44	712/512/92	No
WT_Sample3	300	185	582	0.09	0.09	0.42	1.443	712/512/92	No
WT_Sample4	300	220	572	0.09	0.09	0.42	1.436	712/512/92	No
WT_Sample5	300	195	582	0.09	0.09	0.42	1.436	712/512/92	No
WT_Sample6	240	205	579	0.09	0.09	0.42	1.403	712/512/92	No
WT_Sample7	300	205	584	0.09	0.09	0.42	1.431	712/512/92	Yes
WT_Sample8	280	195	589	0.09	0.09	0.42	1.443	712/512/92	No
MT_lag-1_1	300	195	512	0.09	0.09	0.42	1.449	712/512/92	No
MT_lag-1_2	300	195	511	0.09	0.09	0.42	1.449	712/512/92	No
MT_pop-1_1	300	140	330	0.09	0.09	0.42	1.44	712/512/92	No
MT_pop-1_2	300	155	330	0.09	0.09	0.42	1.44	712/512/92	No
