# Supplementary material for: Cell lineage-resolved embryonic morphological map reveals novel signaling regulating cell fate and size asymmetry
Source: Research Square preprint supplement (doi:10.21203/rs.3.rs-4664717/v1), 2024-08-30
Supplement: Supplementary file 17 [file Table S4.xlsx]

## Sheet: Embryonic cell list
Cell identity	Terminal cell or not	Apoptotic cell or not	Cell lineage	Cell fate	Embryo sample
					WT_Sample1	WT_Sample2	WT_Sample3	WT_Sample4	WT_Sample5	WT_Sample6	WT_Sample7	WT_Sample8
ABplapaaaapp'	Yes'	No'	AB'	Neuron'	×'	×'	×'	×'	×'	×'	×'	×'
ABprapaaaapp'	Yes'	No'	AB'	Neuron'	×'	×'	×'	×'	×'	×'	×'	×'
ABplapaaaapa'	Yes'	No'	AB'	Neuron'	×'	×'	×'	×'	×'	×'	×'	×'
ABprapaaaapa'	Yes'	No'	AB'	Neuron'	×'	×'	×'	×'	×'	×'	×'	×'
ABarppaaaa'	Yes'	No'	AB'	Neuron'	√'	√'	√'	√'	√'	√'	√'	√'
ABarpppaaa'	Yes'	No'	AB'	Neuron'	√'	√'	√'	√'	√'	√'	√'	√'
ABalpppppaa'	Yes'	No'	AB'	Neuron'	√'	√'	√'	√'	√'	√'	√'	√'
ABpraaappaa'	Yes'	No'	AB'	Neuron'	√'	√'	√'	√'	√'	√'	√'	√'
ABalppppaad'	Yes'	No'	AB'	Neuron'	√'	√'	√'	√'	√'	√'	√'	√'
ABpraaapaad'	Yes'	No'	AB'	Neuron'	√'	√'	√'	√'	√'	√'	√'	√'
ABalpppapav'	Yes'	No'	AB'	Neuron'	√'	√'	√'	√'	√'	√'	√'	√'
ABpraaaapav'	Yes'	No'	AB'	Neuron'	√'	√'	√'	√'	√'	√'	√'	×'
ABplppaappa'	Yes'	No'	AB'	Neuron'	√'	√'	√'	√'	√'	√'	√'	√'
ABprppaappa'	Yes'	No'	AB'	Neuron'	√'	√'	√'	√'	√'	√'	√'	√'
ABplaapappa'	Yes'	No'	AB'	Neuron'	√'	√'	√'	√'	√'	√'	√'	√'
ABpraapappa'	Yes'	No'	AB'	Neuron'	√'	√'	√'	√'	√'	√'	√'	√'
ABplpaapppa'	Yes'	No'	AB'	Neuron'	√'	√'	√'	√'	√'	√'	√'	√'
ABprpaapppa'	Yes'	No'	AB'	Neuron'	√'	√'	√'	√'	√'	√'	√'	√'
ABalaaaalal'	Yes'	No'	AB'	Neuron'	√'	√'	√'	√'	√'	√'	√'	√'
ABalaapaaar'	Yes'	No'	AB'	Neuron'	√'	√'	√'	√'	√'	√'	√'	√'
ABplpapaaap'	Yes'	No'	AB'	Neuron'	√'	√'	√'	√'	√'	√'	√'	√'
ABprpapaaap'	Yes'	No'	AB'	Neuron'	√'	√'	√'	√'	√'	√'	√'	√'
ABplapaaapav'	Yes'	No'	AB'	Neuron'	×'	×'	×'	×'	×'	×'	×'	×'
ABprapaaapav'	Yes'	No'	AB'	Neuron'	×'	×'	×'	×'	×'	×'	×'	×'
ABalapppaaa'	Yes'	No'	AB'	Neuron'	√'	√'	√'	√'	√'	√'	√'	√'
ABarpppappa'	Yes'	No'	AB'	Neuron'	×'	×'	×'	×'	×'	×'	×'	×'
ABplapappppap'	Yes'	No'	AB'	Neuron'	×'	×'	×'	×'	×'	×'	×'	×'
ABprapappppap'	Yes'	No'	AB'	Neuron'	×'	×'	×'	×'	×'	×'	×'	×'
ABplaapaapp'	Yes'	No'	AB'	Neuron'	√'	√'	√'	√'	√'	√'	√'	√'
ABpraapaapp'	Yes'	No'	AB'	Neuron'	√'	√'	√'	√'	√'	√'	√'	√'
ABplpaapapa'	Yes'	No'	AB'	Neuron'	√'	√'	√'	√'	√'	√'	√'	√'
ABprpaapapa'	Yes'	No'	AB'	Neuron'	√'	√'	√'	√'	√'	√'	√'	√'
ABalppppppaa'	Yes'	No'	AB'	Neuron'	√'	√'	√'	√'	√'	√'	×'	√'
ABpraaapppaa'	Yes'	No'	AB'	Neuron'	√'	×'	√'	√'	×'	×'	×'	×'
ABplaapapap'	Yes'	No'	AB'	Neuron'	√'	√'	√'	√'	√'	√'	√'	√'
ABpraapapap'	Yes'	No'	AB'	Neuron'	√'	√'	√'	√'	√'	√'	√'	√'
ABplpaappaa'	Yes'	No'	AB'	Neuron'	√'	√'	√'	√'	√'	√'	√'	√'
ABprpaappaa'	Yes'	No'	AB'	Neuron'	√'	√'	√'	√'	√'	√'	√'	√'
ABplaapapppa'	Yes'	No'	AB'	Neuron'	√'	×'	×'	×'	×'	×'	×'	×'
ABpraapapppa'	Yes'	No'	AB'	Neuron'	√'	×'	×'	×'	×'	×'	×'	×'
ABalpppppppa'	Yes'	No'	AB'	Neuron'	√'	√'	√'	√'	×'	√'	√'	√'
ABpraaappppa'	Yes'	No'	AB'	Neuron'	√'	√'	√'	√'	×'	×'	√'	√'
ABalpppapppa'	Yes'	No'	AB'	Neuron'	√'	×'	×'	×'	×'	×'	×'	×'
ABpraaaapppa'	Yes'	No'	AB'	Neuron'	√'	×'	×'	×'	×'	×'	×'	×'
ABalpppppppp'	Yes'	No'	AB'	Neuron'	√'	√'	√'	√'	×'	√'	√'	√'
ABpraaappppp'	Yes'	No'	AB'	Neuron'	√'	√'	√'	√'	×'	×'	√'	√'
ABalppaaapa'	Yes'	No'	AB'	Neuron'	√'	√'	√'	√'	√'	√'	√'	√'
ABalaappapa'	Yes'	No'	AB'	Neuron'	√'	√'	√'	√'	√'	√'	√'	√'
ABplpaapaap'	Yes'	No'	AB'	Neuron'	√'	√'	√'	√'	√'	√'	√'	√'
ABprpaapaap'	Yes'	No'	AB'	Neuron'	√'	√'	√'	√'	√'	√'	√'	√'
ABalaaapalr'	Yes'	No'	AB'	Neuron'	√'	√'	√'	√'	√'	√'	√'	√'
ABalaaapprl'	Yes'	No'	AB'	Neuron'	√'	√'	√'	√'	√'	√'	√'	√'
ABalpppaaaa'	Yes'	No'	AB'	Neuron'	√'	√'	√'	√'	√'	√'	√'	√'
ABpraaaaaaa'	Yes'	No'	AB'	Neuron'	√'	√'	√'	√'	√'	√'	√'	√'
ABprpapppap'	Yes'	No'	AB'	Neuron'	√'	√'	√'	√'	√'	√'	√'	√'
ABalapaaaaa'	Yes'	No'	AB'	Neuron'	√'	√'	√'	√'	√'	√'	√'	√'
ABalappapaa'	Yes'	No'	AB'	Neuron'	√'	√'	√'	√'	√'	√'	√'	√'
ABalapapppa'	Yes'	No'	AB'	Neuron'	√'	√'	√'	√'	√'	√'	√'	√'
ABalapppppa'	Yes'	No'	AB'	Neuron'	√'	√'	√'	√'	√'	√'	√'	√'
ABplpapapap'	Yes'	No'	AB'	Neuron'	√'	√'	√'	√'	√'	√'	√'	√'
ABprpapapap'	Yes'	No'	AB'	Neuron'	√'	√'	√'	√'	√'	√'	√'	√'
ABprpappaap'	Yes'	No'	AB'	Neuron'	√'	√'	√'	√'	√'	√'	√'	√'
ABplaapapaa'	Yes'	No'	AB'	Neuron'	√'	√'	√'	√'	√'	√'	√'	√'
ABpraapapaa'	Yes'	No'	AB'	Neuron'	√'	√'	√'	√'	√'	√'	√'	√'
ABalpppppap'	Yes'	No'	AB'	Neuron'	√'	√'	√'	√'	√'	√'	√'	√'
ABpraaappap'	Yes'	No'	AB'	Neuron'	√'	√'	√'	√'	√'	√'	√'	√'
ABplpaaaaap'	Yes'	No'	AB'	Neuron'	√'	√'	√'	√'	√'	√'	√'	√'
ABprpaaaaap'	Yes'	No'	AB'	Neuron'	√'	√'	√'	√'	√'	√'	√'	√'
ABprppppapa'	Yes'	No'	AB'	Other'	√'	√'	√'	√'	√'	√'	√'	√'
ABalppappap'	Yes'	No'	AB'	Neuron'	√'	√'	√'	√'	√'	√'	√'	√'
ABarappppap'	Yes'	No'	AB'	Neuron'	√'	√'	√'	√'	√'	√'	√'	√'
ABarppaappp'	Yes'	No'	AB'	Neuron'	×'	×'	×'	×'	×'	×'	×'	×'
ABarpppappp'	Yes'	No'	AB'	Neuron'	×'	×'	×'	×'	×'	×'	×'	×'
ABalapaaapa'	Yes'	No'	AB'	Neuron'	√'	√'	√'	√'	√'	√'	√'	√'
ABalappappa'	Yes'	No'	AB'	Neuron'	√'	√'	√'	√'	√'	√'	√'	√'
ABplaaaaappa'	Yes'	No'	AB'	Neuron'	√'	×'	×'	×'	×'	×'	×'	×'
ABarpapaappa'	Yes'	No'	AB'	Neuron'	√'	×'	×'	×'	×'	×'	×'	×'
ABplpaappppa'	Yes'	No'	AB'	Neuron'	√'	×'	×'	×'	×'	×'	×'	×'
ABprpaappppa'	Yes'	No'	AB'	Neuron'	√'	×'	×'	×'	×'	×'	×'	×'
ABarpaaaapp'	Yes'	No'	AB'	Neuron'	√'	√'	√'	√'	√'	√'	√'	√'
ABarpaaapap'	Yes'	No'	AB'	Neuron'	√'	√'	√'	√'	√'	√'	√'	√'
ABplpaaapap'	Yes'	No'	AB'	Neuron'	√'	√'	√'	√'	√'	√'	√'	√'
ABprpaaapap'	Yes'	No'	AB'	Neuron'	√'	√'	√'	√'	√'	√'	√'	√'
ABalapapppp'	Yes'	No'	AB'	Neuron'	√'	√'	√'	√'	√'	√'	√'	√'
ABalapppppp'	Yes'	No'	AB'	Neuron'	√'	√'	√'	√'	√'	√'	√'	√'
ABalppaappp'	Yes'	No'	AB'	Neuron'	√'	√'	√'	√'	√'	√'	√'	√'
ABalaapappp'	Yes'	No'	AB'	Neuron'	√'	√'	√'	√'	√'	√'	√'	√'
ABprppapaap'	Yes'	No'	AB'	Neuron'	√'	√'	√'	√'	√'	√'	√'	√'
ABplppapapa'	Yes'	No'	AB'	Neuron'	√'	√'	√'	√'	√'	√'	×'	√'
ABprppapapa'	Yes'	No'	AB'	Neuron'	√'	√'	√'	√'	√'	√'	√'	√'
ABplppapapp'	Yes'	No'	AB'	Neuron'	√'	√'	√'	√'	√'	√'	×'	√'
ABprppapapp'	Yes'	No'	AB'	Neuron'	√'	√'	√'	√'	√'	√'	√'	√'
ABplpppaaap'	Yes'	No'	AB'	Neuron'	√'	√'	√'	√'	√'	√'	√'	√'
ABprpppaaap'	Yes'	No'	AB'	Neuron'	√'	√'	√'	√'	√'	√'	√'	√'
ABprpapappp'	Yes'	No'	AB'	Neuron'	√'	√'	√'	√'	√'	√'	√'	√'
ABplpppaaaa'	Yes'	No'	AB'	Neuron'	√'	√'	√'	√'	√'	√'	√'	√'
ABplpaaaapp'	Yes'	No'	AB'	Neuron'	√'	√'	√'	√'	√'	√'	√'	√'
ABarappappa'	Yes'	No'	AB'	Neuron'	√'	√'	√'	√'	√'	√'	√'	√'
ABprpaaaapp'	Yes'	No'	AB'	Neuron'	√'	√'	√'	√'	√'	√'	√'	√'
ABprpappapp'	Yes'	No'	AB'	Neuron'	√'	√'	√'	√'	√'	√'	√'	√'
ABplpapappp'	Yes'	No'	AB'	Neuron'	√'	√'	√'	√'	√'	√'	√'	√'
ABplppaappp'	Yes'	No'	AB'	Neuron'	√'	√'	√'	√'	√'	√'	√'	√'
ABprppaappp'	Yes'	No'	AB'	Neuron'	√'	√'	√'	√'	√'	√'	√'	√'
ABplppappap'	Yes'	No'	AB'	Neuron'	√'	√'	√'	√'	√'	√'	√'	√'
ABprppappap'	Yes'	No'	AB'	Neuron'	√'	√'	√'	√'	√'	√'	√'	√'
ABplppapppa'	Yes'	No'	AB'	Neuron'	√'	√'	√'	√'	√'	√'	√'	√'
ABprppapppa'	Yes'	No'	AB'	Neuron'	√'	√'	√'	√'	√'	√'	√'	√'
ABplppapppp'	Yes'	No'	AB'	Neuron'	√'	√'	√'	√'	√'	√'	√'	√'
ABprppapppp'	Yes'	No'	AB'	Neuron'	√'	√'	√'	√'	√'	√'	√'	√'
ABprppppapp'	Yes'	No'	AB'	Neuron'	√'	√'	√'	√'	√'	√'	√'	√'
Caapaa'	Yes'	No'	C'	Neuron'	√'	√'	√'	√'	√'	√'	√'	√'
ABplppppapp'	Yes'	No'	AB'	Other'	√'	√'	√'	√'	√'	√'	√'	√'
ABplapaaapad'	Yes'	No'	AB'	Neuron'	×'	×'	×'	×'	×'	×'	×'	×'
ABprapaaapad'	Yes'	No'	AB'	Neuron'	×'	×'	×'	×'	×'	×'	×'	×'
MSaaaaaal'	Yes'	No'	MS'	Other'	√'	×'	×'	√'	×'	√'	×'	×'
MSaaaaaar'	Yes'	No'	MS'	Other'	√'	×'	×'	√'	×'	√'	×'	×'
MSapaaaad'	Yes'	No'	MS'	Other'	√'	×'	×'	×'	×'	×'	×'	×'
MSppaaaad'	Yes'	No'	MS'	Other'	√'	×'	×'	×'	×'	×'	×'	×'
MSapaaaav'	Yes'	No'	MS'	Other'	√'	×'	×'	×'	×'	×'	×'	×'
MSppaaaav'	Yes'	No'	MS'	Other'	√'	×'	×'	×'	×'	×'	×'	×'
ABprpaaaapa'	Yes'	No'	AB'	Other'	√'	√'	√'	√'	√'	√'	√'	√'
ABplapaapa'	Yes'	No'	AB'	Other'	√'	√'	√'	√'	√'	√'	√'	√'
ABplaaappa'	Yes'	No'	AB'	Skin'	√'	√'	√'	√'	√'	√'	√'	√'
ABarpapppa'	Yes'	No'	AB'	Skin'	√'	√'	√'	√'	√'	√'	√'	√'
ABplaaappp'	Yes'	No'	AB'	Skin'	√'	√'	√'	√'	√'	√'	√'	√'
ABarpapppp'	Yes'	No'	AB'	Skin'	√'	√'	√'	√'	√'	√'	√'	√'
ABarppaaap'	Yes'	No'	AB'	Skin'	√'	√'	√'	√'	√'	√'	√'	√'
ABarpppaap'	Yes'	No'	AB'	Skin'	√'	√'	√'	√'	√'	√'	√'	√'
ABplapppappa'	Yes'	No'	AB'	Neuron'	√'	×'	×'	×'	×'	×'	×'	×'
ABprapppappa'	Yes'	No'	AB'	Neuron'	×'	×'	×'	×'	×'	×'	×'	×'
ABalpapppaa'	Yes'	No'	AB'	Pharynx'	√'	√'	√'	√'	√'	√'	√'	√'
ABarapappaa'	Yes'	No'	AB'	Pharynx'	√'	√'	√'	√'	√'	√'	√'	√'
ABalpappaapa'	Yes'	No'	AB'	Pharynx'	√'	×'	×'	×'	×'	×'	×'	×'
ABarapapaapa'	Yes'	No'	AB'	Pharynx'	√'	×'	×'	×'	×'	×'	×'	×'
MSaaaaapaa'	Yes'	No'	MS'	Pharynx'	√'	√'	×'	×'	×'	×'	×'	×'
MSaaaapaa'	Yes'	No'	MS'	Pharynx'	√'	√'	√'	√'	√'	√'	√'	√'
ABarapapapp'	Yes'	No'	AB'	Pharynx'	√'	√'	√'	√'	√'	√'	√'	√'
MSpaaapaa'	Yes'	No'	MS'	Pharynx'	√'	√'	√'	√'	√'	√'	√'	√'
ABalapappaaa'	Yes'	No'	AB'	Neuron'	√'	×'	×'	×'	×'	×'	×'	×'
ABalappppaaa'	Yes'	No'	AB'	Neuron'	√'	×'	×'	×'	×'	×'	×'	×'
ABalapaappaa'	Yes'	No'	AB'	Neuron'	×'	×'	×'	×'	×'	×'	×'	×'
ABalaappppaa'	Yes'	No'	AB'	Neuron'	×'	×'	×'	×'	×'	×'	×'	×'
ABalppapppaa'	Yes'	No'	AB'	Neuron'	×'	×'	×'	×'	×'	×'	×'	×'
ABarapppppaa'	Yes'	No'	AB'	Neuron'	×'	×'	×'	×'	×'	×'	×'	×'
ABalapappap'	Yes'	No'	AB'	Neuron'	√'	√'	√'	√'	√'	√'	√'	√'
ABalappppap'	Yes'	No'	AB'	Neuron'	√'	√'	√'	√'	√'	√'	√'	√'
ABalapaappp'	Yes'	No'	AB'	Neuron'	√'	√'	√'	√'	√'	√'	√'	√'
ABalaappppp'	Yes'	No'	AB'	Neuron'	√'	√'	√'	√'	√'	√'	√'	√'
ABalppapppp'	Yes'	No'	AB'	Neuron'	√'	√'	√'	√'	√'	√'	√'	√'
ABarapppppp'	Yes'	No'	AB'	Neuron'	√'	√'	√'	√'	√'	√'	√'	√'
ABalaaaparr'	Yes'	No'	AB'	Neuron'	√'	√'	√'	√'	√'	√'	√'	√'
ABalaaappll'	Yes'	No'	AB'	Neuron'	√'	√'	√'	√'	√'	√'	√'	√'
ABalaaaalpp'	Yes'	No'	AB'	Neuron'	√'	√'	√'	√'	√'	√'	√'	√'
ABalaapaapp'	Yes'	No'	AB'	Neuron'	√'	√'	√'	√'	√'	√'	√'	√'
ABalppapaap'	Yes'	No'	AB'	Neuron'	√'	√'	√'	√'	√'	√'	√'	√'
ABarapppaap'	Yes'	No'	AB'	Neuron'	√'	√'	√'	√'	√'	√'	√'	√'
ABplaapaaap'	Yes'	No'	AB'	Neuron'	√'	√'	√'	√'	√'	√'	√'	√'
ABpraapaaap'	Yes'	No'	AB'	Neuron'	√'	√'	√'	√'	√'	√'	√'	√'
ABalaaapall'	Yes'	No'	AB'	Neuron'	√'	√'	√'	√'	√'	√'	√'	√'
ABalaaapprr'	Yes'	No'	AB'	Neuron'	√'	√'	√'	√'	√'	√'	√'	√'
ABalppapapp'	Yes'	No'	AB'	Neuron'	√'	√'	√'	√'	√'	√'	√'	√'
ABarapppapp'	Yes'	No'	AB'	Neuron'	√'	√'	√'	√'	√'	√'	√'	√'
ABplpapppaa'	Yes'	No'	AB'	Other'	√'	√'	√'	√'	√'	√'	√'	√'
ABplpapppap'	Yes'	No'	AB'	Other'	√'	√'	√'	√'	√'	√'	√'	√'
ABplpppaapap'	Yes'	No'	AB'	Neuron'	×'	×'	×'	×'	×'	×'	×'	×'
ABprpppaapap'	Yes'	No'	AB'	Neuron'	×'	×'	×'	×'	×'	×'	×'	×'
MSapaapp'	Yes'	No'	MS'	Other'	√'	√'	√'	√'	√'	√'	√'	√'
MSpaapaaa'	Yes'	No'	MS'	Pharynx'	√'	√'	√'	√'	√'	√'	√'	√'
ABaraapappa'	Yes'	No'	AB'	Pharynx'	√'	√'	√'	√'	√'	√'	√'	√'
ABaraappppa'	Yes'	No'	AB'	Pharynx'	√'	√'	√'	√'	√'	√'	√'	√'
ABaraapappp'	Yes'	No'	AB'	Pharynx'	√'	√'	√'	√'	√'	√'	√'	√'
ABaraappppp'	Yes'	No'	AB'	Pharynx'	√'	√'	√'	√'	√'	√'	√'	√'
MSpaaaaaa'	Yes'	No'	MS'	Pharynx'	√'	√'	√'	√'	√'	√'	√'	√'
MSpaaapap'	Yes'	No'	MS'	Pharynx'	√'	√'	√'	√'	√'	√'	√'	√'
ABalpaaappp'	Yes'	No'	AB'	Pharynx'	√'	√'	√'	√'	√'	√'	√'	√'
ABarapaappp'	Yes'	No'	AB'	Pharynx'	√'	√'	√'	√'	√'	√'	√'	√'
ABaraappaaa'	Yes'	No'	AB'	Pharynx'	√'	√'	√'	√'	√'	√'	√'	√'
ABaraapapaav'	Yes'	No'	AB'	Pharynx'	×'	×'	×'	×'	×'	×'	×'	×'
ABaraapppaav'	Yes'	No'	AB'	Pharynx'	×'	×'	×'	×'	×'	×'	×'	×'
ABalppppapaa'	Yes'	No'	AB'	Neuron'	√'	×'	×'	×'	×'	×'	×'	×'
ABpraaapapaa'	Yes'	No'	AB'	Neuron'	×'	×'	×'	×'	×'	×'	×'	×'
ABalpppaapd'	Yes'	No'	AB'	Neuron'	√'	√'	√'	√'	√'	√'	√'	√'
ABpraaaaapd'	Yes'	No'	AB'	Neuron'	√'	√'	√'	√'	√'	√'	√'	√'
ABalapaaapp'	Yes'	No'	AB'	Neuron'	√'	√'	√'	√'	√'	√'	√'	√'
ABalappappp'	Yes'	No'	AB'	Neuron'	√'	√'	√'	√'	√'	√'	√'	√'
ABalapapapaa'	Yes'	No'	AB'	Neuron'	√'	×'	×'	×'	×'	×'	×'	×'
ABalapppapaa'	Yes'	No'	AB'	Neuron'	√'	×'	×'	×'	×'	×'	×'	×'
ABplpaaappaa'	Yes'	No'	AB'	Neuron'	√'	×'	×'	×'	×'	×'	×'	×'
ABprpaaappaa'	Yes'	No'	AB'	Neuron'	×'	×'	×'	×'	×'	×'	×'	×'
ABarpaaaapa'	Yes'	No'	AB'	Neuron'	√'	√'	√'	√'	√'	√'	√'	√'
ABarpaaapaa'	Yes'	No'	AB'	Neuron'	√'	√'	√'	√'	√'	√'	√'	√'
ABalpppaaap'	Yes'	No'	AB'	Neuron'	√'	√'	√'	√'	√'	√'	√'	√'
ABpraaaaaap'	Yes'	No'	AB'	Neuron'	√'	√'	√'	√'	√'	√'	√'	√'
ABarpaaaaal'	Yes'	No'	AB'	Neuron'	√'	√'	√'	√'	√'	√'	√'	√'
ABarpaaaaar'	Yes'	No'	AB'	Neuron'	√'	√'	√'	√'	√'	√'	√'	√'
ABalppaaapp'	Yes'	No'	AB'	Neuron'	√'	√'	√'	√'	√'	√'	√'	√'
ABalaappapp'	Yes'	No'	AB'	Neuron'	√'	√'	√'	√'	√'	√'	√'	√'
ABplapaapp'	Yes'	No'	AB'	Skin'	√'	√'	√'	√'	√'	√'	√'	√'
ABprapaapp'	Yes'	No'	AB'	Skin'	√'	√'	√'	√'	√'	√'	√'	√'
ABplappaaa'	Yes'	No'	AB'	Skin'	√'	√'	√'	√'	√'	√'	√'	√'
ABprappaaa'	Yes'	No'	AB'	Skin'	√'	√'	√'	√'	√'	√'	√'	√'
ABplappaap'	Yes'	No'	AB'	Skin'	√'	√'	√'	√'	√'	√'	√'	√'
ABprappaap'	Yes'	No'	AB'	Skin'	√'	√'	√'	√'	√'	√'	√'	√'
ABplappapp'	Yes'	No'	AB'	Skin'	√'	√'	√'	√'	√'	√'	√'	√'
ABprappapp'	Yes'	No'	AB'	Skin'	√'	√'	√'	√'	√'	√'	√'	√'
ABplapapap'	Yes'	No'	AB'	Skin'	√'	√'	√'	√'	√'	√'	√'	√'
ABprapapap'	Yes'	No'	AB'	Skin'	√'	√'	√'	√'	√'	√'	√'	√'
ABplapappa'	Yes'	No'	AB'	Skin'	√'	√'	√'	√'	√'	√'	√'	√'
ABprapappa'	Yes'	No'	AB'	Skin'	√'	√'	√'	√'	√'	√'	√'	√'
ABprpppaaaa'	Yes'	No'	AB'	Other'	√'	√'	√'	√'	√'	√'	√'	√'
ABplpppaapp'	Yes'	No'	AB'	Neuron'	√'	√'	√'	√'	√'	√'	√'	√'
ABprpppaapp'	Yes'	No'	AB'	Neuron'	√'	√'	√'	√'	√'	√'	√'	√'
ABplapppappp'	Yes'	No'	AB'	Neuron'	√'	×'	×'	×'	×'	×'	×'	×'
ABprapppappp'	Yes'	No'	AB'	Neuron'	×'	×'	×'	×'	×'	×'	×'	×'
ABplpppapaa'	Yes'	No'	AB'	Neuron'	√'	√'	√'	√'	√'	√'	√'	√'
ABprpppapaa'	Yes'	No'	AB'	Neuron'	√'	√'	√'	√'	√'	√'	√'	√'
ABplapappppaa'	Yes'	No'	AB'	Neuron'	×'	×'	×'	×'	×'	×'	×'	×'
ABprapappppaa'	Yes'	No'	AB'	Neuron'	×'	×'	×'	×'	×'	×'	×'	×'
ABplpppaapaa'	Yes'	No'	AB'	Neuron'	×'	×'	×'	×'	×'	×'	×'	×'
ABprpppaapaa'	Yes'	No'	AB'	Neuron'	×'	×'	×'	×'	×'	×'	×'	×'
ABplppppaaa'	Yes'	No'	AB'	Neuron'	√'	√'	√'	√'	√'	√'	√'	√'
ABprppppaaa'	Yes'	No'	AB'	Neuron'	√'	√'	√'	√'	√'	√'	√'	√'
ABplapppaaa'	Yes'	No'	AB'	Neuron'	√'	√'	√'	√'	√'	√'	√'	√'
ABprapppaaa'	Yes'	No'	AB'	Neuron'	√'	√'	√'	√'	√'	√'	√'	√'
Caappv'	Yes'	No'	C'	Neuron'	√'	√'	√'	√'	√'	√'	√'	√'
ABplpappppa'	Yes'	No'	AB'	Neuron'	√'	√'	√'	√'	√'	√'	√'	√'
ABplapapaaa'	Yes'	No'	AB'	Other'	×'	×'	×'	×'	×'	×'	×'	×'
ABprapapaaa'	Yes'	No'	AB'	Other'	×'	×'	×'	×'	×'	×'	×'	×'
ABalapaapaa'	Yes'	No'	AB'	Neuron'	√'	√'	√'	√'	√'	√'	√'	√'
ABalaapppaa'	Yes'	No'	AB'	Neuron'	√'	√'	√'	√'	√'	√'	√'	√'
ABplpaappap'	Yes'	No'	AB'	Neuron'	√'	√'	√'	√'	√'	√'	√'	√'
ABprpaappap'	Yes'	No'	AB'	Neuron'	√'	√'	√'	√'	√'	√'	√'	√'
ABplppaaaapp'	Yes'	No'	AB'	Neuron'	√'	×'	×'	×'	×'	×'	×'	×'
ABprppaaaapp'	Yes'	No'	AB'	Neuron'	√'	×'	×'	×'	×'	×'	×'	×'
ABalappaapa'	Yes'	No'	AB'	Neuron'	√'	√'	√'	√'	√'	√'	√'	√'
ABplppapaaap'	Yes'	No'	AB'	Neuron'	×'	×'	×'	×'	×'	×'	×'	×'
ABprppapaaap'	Yes'	No'	AB'	Neuron'	×'	×'	×'	×'	×'	×'	×'	×'
ABplppappaa'	Yes'	No'	AB'	Neuron'	√'	√'	√'	√'	√'	√'	√'	√'
ABprppappaa'	Yes'	No'	AB'	Neuron'	√'	√'	√'	√'	√'	√'	√'	√'
ABprpappaaa'	Yes'	No'	AB'	Neuron'	√'	√'	√'	√'	√'	√'	√'	√'
ABplppaapap'	Yes'	No'	AB'	Neuron'	√'	√'	√'	√'	√'	√'	√'	√'
ABprppaapap'	Yes'	No'	AB'	Neuron'	√'	√'	√'	√'	√'	√'	√'	√'
ABalpapaaaa'	Yes'	No'	AB'	Neuron'	√'	√'	√'	√'	√'	√'	√'	√'
ABarappaaaa'	Yes'	No'	AB'	Neuron'	√'	√'	√'	√'	√'	√'	√'	√'
ABprpapppaa'	Yes'	No'	AB'	Neuron'	√'	√'	√'	√'	√'	√'	√'	√'
ABprpappapa'	Yes'	No'	AB'	Neuron'	√'	√'	√'	√'	√'	√'	√'	√'
ABplpaapaaa'	Yes'	No'	AB'	Neuron'	√'	√'	√'	√'	√'	√'	√'	√'
ABprpaapaaa'	Yes'	No'	AB'	Neuron'	√'	√'	√'	√'	√'	√'	√'	√'
ABalpapapaa'	Yes'	No'	AB'	Neuron'	√'	√'	√'	√'	√'	√'	√'	√'
ABarappapaa'	Yes'	No'	AB'	Neuron'	√'	√'	√'	√'	√'	√'	√'	√'
ABalpppapad'	Yes'	No'	AB'	Neuron'	√'	√'	√'	√'	√'	√'	√'	√'
ABpraaaapad'	Yes'	No'	AB'	Neuron'	√'	√'	√'	√'	√'	√'	√'	×'
ABalppapaaa'	Yes'	No'	AB'	Neuron'	√'	√'	√'	√'	√'	√'	√'	√'
ABarapppaaa'	Yes'	No'	AB'	Neuron'	√'	√'	√'	√'	√'	√'	√'	√'
ABalapppaap'	Yes'	No'	AB'	Neuron'	√'	√'	√'	√'	√'	√'	√'	√'
ABalaaaarlp'	Yes'	No'	AB'	Neuron'	√'	√'	√'	√'	√'	√'	√'	√'
ABalaaaarrp'	Yes'	No'	AB'	Neuron'	√'	√'	√'	√'	√'	√'	√'	√'
ABplpappaaa'	Yes'	No'	AB'	Neuron'	√'	√'	√'	√'	√'	√'	√'	√'
ABplapaaapp'	Yes'	No'	AB'	Neuron'	√'	√'	√'	√'	√'	√'	√'	√'
ABprapaaapp'	Yes'	No'	AB'	Neuron'	√'	√'	√'	√'	√'	√'	√'	√'
ABalppapapa'	Yes'	No'	AB'	Neuron'	√'	√'	√'	√'	√'	√'	√'	√'
ABarapppapa'	Yes'	No'	AB'	Neuron'	√'	√'	√'	√'	√'	√'	√'	√'
ABplpaaaaaa'	Yes'	No'	AB'	Neuron'	√'	√'	√'	√'	√'	√'	√'	√'
ABprpaaaaaa'	Yes'	No'	AB'	Neuron'	√'	√'	√'	√'	√'	√'	√'	√'
ABplppapaap'	Yes'	No'	AB'	Neuron'	√'	√'	√'	√'	√'	√'	√'	√'
ABplppapaaaa'	Yes'	No'	AB'	Neuron'	×'	×'	×'	×'	×'	×'	×'	×'
ABprppapaaaa'	Yes'	No'	AB'	Neuron'	×'	×'	×'	×'	×'	×'	×'	×'
ABplpapaapa'	Yes'	No'	AB'	Neuron'	√'	√'	√'	√'	√'	√'	√'	√'
ABprpapaapa'	Yes'	No'	AB'	Neuron'	√'	√'	√'	√'	√'	√'	√'	√'
ABplpapappa'	Yes'	No'	AB'	Neuron'	√'	√'	√'	√'	√'	√'	√'	√'
ABprpapappa'	Yes'	No'	AB'	Neuron'	√'	√'	√'	√'	√'	√'	√'	√'
ABplppaaaaa'	Yes'	No'	AB'	Neuron'	√'	√'	√'	√'	√'	√'	√'	√'
ABprppaaaaa'	Yes'	No'	AB'	Neuron'	√'	√'	√'	√'	√'	√'	√'	√'
ABplpapaapp'	Yes'	No'	AB'	Neuron'	√'	√'	√'	√'	√'	√'	√'	√'
ABprpapaapp'	Yes'	No'	AB'	Neuron'	√'	√'	√'	√'	√'	√'	√'	√'
ABalpapapapp'	Yes'	No'	AB'	Neuron'	√'	×'	×'	×'	×'	×'	×'	×'
ABarappapapp'	Yes'	No'	AB'	Neuron'	×'	×'	×'	×'	×'	×'	×'	×'
ABalpapappp'	Yes'	No'	AB'	Neuron'	√'	√'	√'	√'	√'	√'	√'	√'
ABarappappp'	Yes'	No'	AB'	Neuron'	√'	√'	√'	√'	√'	√'	√'	√'
ABplpapaaaa'	Yes'	No'	AB'	Neuron'	√'	√'	√'	√'	√'	√'	√'	√'
ABprpapaaaa'	Yes'	No'	AB'	Neuron'	√'	√'	√'	√'	√'	√'	√'	√'
ABalppappaa'	Yes'	No'	AB'	Neuron'	√'	√'	√'	√'	√'	√'	√'	√'
ABarappppaa'	Yes'	No'	AB'	Neuron'	√'	√'	√'	√'	√'	√'	√'	√'
ABplappppp'	Yes'	No'	AB'	Skin'	√'	√'	√'	√'	√'	√'	√'	√'
ABprappppp'	Yes'	No'	AB'	Skin'	√'	√'	√'	√'	√'	√'	√'	√'
ABplppppapa'	Yes'	No'	AB'	Other'	√'	√'	√'	√'	√'	√'	√'	√'
ABplaaaaaaa'	Yes'	No'	AB'	Neuron'	√'	√'	√'	√'	√'	√'	√'	√'
ABarpapaaaa'	Yes'	No'	AB'	Neuron'	√'	√'	√'	√'	√'	√'	√'	√'
ABplpaaapaa'	Yes'	No'	AB'	Neuron'	√'	√'	√'	√'	√'	√'	√'	√'
ABprpaaapaa'	Yes'	No'	AB'	Neuron'	√'	√'	√'	√'	√'	√'	√'	√'
ABplaapaapa'	Yes'	No'	AB'	Neuron'	√'	√'	√'	√'	√'	√'	√'	√'
ABpraapaapa'	Yes'	No'	AB'	Neuron'	√'	√'	√'	√'	√'	√'	√'	√'
ABplaaaaappp'	Yes'	No'	AB'	Neuron'	√'	×'	×'	×'	×'	×'	×'	×'
ABarpapaappp'	Yes'	No'	AB'	Neuron'	√'	×'	×'	×'	×'	×'	×'	×'
ABalapapapp'	Yes'	No'	AB'	Neuron'	√'	√'	√'	√'	√'	√'	√'	√'
ABalapppapp'	Yes'	No'	AB'	Neuron'	√'	√'	√'	√'	√'	√'	√'	√'
ABplpaaappp'	Yes'	No'	AB'	Neuron'	√'	√'	√'	√'	√'	√'	√'	√'
ABprpaaappp'	Yes'	No'	AB'	Neuron'	√'	√'	√'	√'	√'	√'	√'	√'
ABarppapaa'	Yes'	No'	AB'	Skin'	√'	√'	√'	√'	√'	√'	√'	√'
ABarppppaa'	Yes'	No'	AB'	Skin'	√'	√'	√'	√'	√'	√'	√'	√'
ABarppapap'	Yes'	No'	AB'	Skin'	√'	√'	√'	√'	√'	√'	√'	√'
ABarppppap'	Yes'	No'	AB'	Skin'	√'	√'	√'	√'	√'	√'	√'	√'
ABplappapa'	Yes'	No'	AB'	Skin'	√'	√'	√'	√'	√'	√'	√'	√'
ABprappapa'	Yes'	No'	AB'	Skin'	√'	√'	√'	√'	√'	√'	√'	√'
ABarppappa'	Yes'	No'	AB'	Skin'	√'	√'	√'	√'	√'	√'	√'	√'
ABarpppppa'	Yes'	No'	AB'	Skin'	√'	√'	√'	√'	√'	√'	√'	√'
ABplapapaap'	Yes'	No'	AB'	Skin'	×'	×'	×'	×'	×'	×'	×'	×'
ABprapapaap'	Yes'	No'	AB'	Skin'	×'	×'	×'	×'	×'	×'	×'	×'
ABarppappp'	Yes'	No'	AB'	Skin'	√'	√'	√'	√'	√'	√'	√'	√'
ABarpppppp'	Yes'	No'	AB'	Skin'	√'	√'	√'	√'	√'	√'	√'	√'
ABprapaapa'	Yes'	No'	AB'	Other'	√'	√'	√'	√'	√'	√'	√'	√'
ABplaaapaa'	Yes'	No'	AB'	Skin'	√'	√'	√'	√'	√'	√'	√'	√'
ABarpappaa'	Yes'	No'	AB'	Skin'	√'	√'	√'	√'	√'	√'	√'	√'
MSpppaap'	Yes'	No'	MS'	Other'	√'	√'	√'	√'	√'	√'	√'	√'
Z3'	Yes'	No'	/'	Germ Cell'	√'	√'	√'	√'	√'	√'	√'	√'
Z2'	Yes'	No'	/'	Germ Cell'	√'	√'	√'	√'	√'	√'	√'	√'
MSappaap'	Yes'	No'	MS'	Other'	√'	√'	√'	√'	√'	√'	√'	√'
ABaraaapppa'	Yes'	No'	AB'	Skin'	√'	√'	√'	√'	√'	√'	√'	√'
ABalpaappaa'	Yes'	No'	AB'	Skin'	√'	√'	√'	√'	√'	√'	√'	√'
ABalpapaapa'	Yes'	No'	AB'	Skin'	√'	√'	√'	√'	√'	√'	√'	√'
ABalpaapaaa'	Yes'	No'	AB'	Skin'	√'	√'	√'	√'	√'	√'	√'	√'
ABalpaappap'	Yes'	No'	AB'	Skin'	√'	√'	√'	√'	√'	√'	√'	√'
ABaraaapaaa'	Yes'	No'	AB'	Skin'	√'	√'	√'	√'	√'	√'	√'	√'
ABaraaappaa'	Yes'	No'	AB'	Skin'	√'	√'	√'	√'	√'	√'	√'	√'
ABaraaappap'	Yes'	No'	AB'	Skin'	√'	√'	√'	√'	√'	√'	√'	√'
ABarapapapa'	Yes'	No'	AB'	Skin'	√'	√'	√'	√'	√'	√'	√'	√'
MSapapaaa'	Yes'	No'	MS'	Other'	×'	×'	×'	×'	×'	×'	×'	×'
MSppapaaa'	Yes'	No'	MS'	Other'	×'	×'	×'	×'	×'	×'	×'	×'
MSapapaap'	Yes'	No'	MS'	Other'	×'	×'	×'	×'	×'	×'	×'	×'
MSppapaap'	Yes'	No'	MS'	Other'	×'	×'	×'	×'	×'	×'	×'	×'
ABaraaaapap'	Yes'	No'	AB'	Pharynx'	√'	√'	√'	√'	√'	√'	√'	√'
ABaraaaaaaa'	Yes'	No'	AB'	Pharynx'	√'	√'	√'	√'	√'	√'	√'	√'
ABaraaaaapa'	Yes'	No'	AB'	Pharynx'	√'	√'	√'	√'	√'	√'	√'	√'
ABalpaapaap'	Yes'	No'	AB'	Pharynx'	√'	√'	√'	√'	√'	√'	√'	√'
ABaraaapaap'	Yes'	No'	AB'	Pharynx'	√'	√'	√'	√'	√'	√'	√'	√'
ABalpappapa'	Yes'	No'	AB'	Pharynx'	√'	√'	√'	√'	√'	√'	√'	√'
ABaraapaaaa'	Yes'	No'	AB'	Pharynx'	√'	√'	√'	√'	√'	√'	√'	√'
ABalpaaaaaa'	Yes'	No'	AB'	Pharynx'	√'	√'	√'	√'	√'	√'	√'	√'
ABarapaaaaa'	Yes'	No'	AB'	Pharynx'	√'	√'	√'	√'	√'	√'	√'	√'
ABplpappaap'	Yes'	No'	AB'	Other'	√'	√'	√'	√'	√'	√'	√'	√'
ABplpaaaapa'	Yes'	No'	AB'	Other'	√'	√'	√'	√'	√'	√'	√'	√'
ABplpapapaa'	Yes'	No'	AB'	Other'	√'	√'	√'	√'	√'	√'	√'	√'
ABprpapapaa'	Yes'	No'	AB'	Other'	√'	√'	√'	√'	√'	√'	√'	√'
MSaapaapaa'	Yes'	No'	MS'	Pharynx'	√'	×'	×'	×'	×'	×'	×'	×'
MSpapaapaa'	Yes'	No'	MS'	Pharynx'	√'	×'	×'	×'	×'	×'	×'	×'
MSaaaaapap'	Yes'	No'	MS'	Pharynx'	√'	√'	×'	×'	×'	×'	×'	×'
MSaapapaa'	Yes'	No'	MS'	Pharynx'	√'	√'	√'	√'	√'	√'	×'	√'
MSpapapaa'	Yes'	No'	MS'	Pharynx'	√'	√'	√'	√'	√'	√'	√'	√'
MSappaaa'	Yes'	No'	MS'	Other'	√'	√'	√'	√'	√'	√'	√'	√'
ABalpaapppa'	Yes'	No'	AB'	Skin'	√'	√'	√'	√'	√'	√'	√'	√'
ABaraaapppp'	Yes'	No'	AB'	Skin'	√'	√'	√'	√'	√'	√'	√'	√'
ABarappaapa'	Yes'	No'	AB'	Skin'	√'	√'	√'	√'	√'	√'	√'	√'
ABalpaapppp'	Yes'	No'	AB'	Skin'	√'	√'	√'	√'	√'	√'	√'	√'
ABalpapaaap'	Yes'	No'	AB'	Skin'	√'	√'	√'	√'	√'	√'	√'	√'
ABplaapaaaa'	Yes'	No'	AB'	Skin'	√'	√'	√'	√'	√'	√'	√'	√'
ABpraapaaaa'	Yes'	No'	AB'	Skin'	√'	√'	√'	√'	√'	√'	√'	√'
ABarpapapa'	Yes'	No'	AB'	Skin'	√'	√'	√'	√'	√'	√'	√'	√'
ABplaappaa'	Yes'	No'	AB'	Skin'	√'	√'	√'	√'	√'	√'	√'	√'
ABpraappaa'	Yes'	No'	AB'	Skin'	√'	√'	√'	√'	√'	√'	√'	√'
ABarpappap'	Yes'	No'	AB'	Skin'	√'	√'	√'	√'	√'	√'	√'	√'
ABplaaapap'	Yes'	No'	AB'	Skin'	√'	√'	√'	√'	√'	√'	√'	√'
ABarpaapaa'	Yes'	No'	AB'	Skin'	√'	√'	√'	√'	√'	√'	√'	√'
ABarpapapp'	Yes'	No'	AB'	Skin'	√'	√'	√'	√'	√'	√'	√'	√'
ABplaaaapa'	Yes'	No'	AB'	Skin'	√'	√'	√'	√'	√'	√'	√'	√'
ABplaaaapp'	Yes'	No'	AB'	Skin'	√'	√'	√'	√'	√'	√'	√'	√'
ABplaappap'	Yes'	No'	AB'	Skin'	√'	√'	√'	√'	√'	√'	√'	√'
ABpraappap'	Yes'	No'	AB'	Skin'	√'	√'	√'	√'	√'	√'	√'	√'
ABarpaapap'	Yes'	No'	AB'	Skin'	√'	√'	√'	√'	√'	√'	√'	√'
ABarpaappa'	Yes'	No'	AB'	Skin'	√'	√'	√'	√'	√'	√'	√'	√'
ABarpaappp'	Yes'	No'	AB'	Skin'	√'	√'	√'	√'	√'	√'	√'	√'
ABarppaapa'	Yes'	No'	AB'	Skin'	√'	√'	√'	√'	√'	√'	√'	√'
ABarpppapa'	Yes'	No'	AB'	Skin'	√'	√'	√'	√'	√'	√'	√'	√'
ABplaapppa'	Yes'	No'	AB'	Skin'	√'	√'	√'	√'	√'	√'	√'	√'
ABplaapppp'	Yes'	No'	AB'	Skin'	√'	√'	√'	√'	√'	√'	√'	√'
ABplappppa'	Yes'	No'	AB'	Skin'	√'	√'	√'	√'	√'	√'	√'	√'
ABpraapppa'	Yes'	No'	AB'	Skin'	√'	√'	√'	√'	√'	√'	√'	√'
ABpraapppp'	Yes'	No'	AB'	Skin'	√'	√'	√'	√'	√'	√'	√'	√'
ABprappppa'	Yes'	No'	AB'	Skin'	√'	√'	√'	√'	√'	√'	√'	√'
Caaaaa'	Yes'	No'	C'	Skin'	√'	√'	√'	√'	√'	√'	√'	√'
Caaaap'	Yes'	No'	C'	Skin'	√'	√'	√'	√'	√'	√'	√'	√'
Caaapa'	Yes'	No'	C'	Skin'	√'	√'	√'	√'	√'	√'	√'	√'
Caaapp'	Yes'	No'	C'	Skin'	√'	√'	√'	√'	√'	√'	√'	√'
Caappd'	Yes'	No'	C'	Skin'	√'	√'	√'	√'	√'	√'	√'	√'
Cpaaaa'	Yes'	No'	C'	Skin'	√'	√'	√'	√'	√'	√'	√'	√'
Cpaaap'	Yes'	No'	C'	Skin'	√'	√'	√'	√'	√'	√'	√'	√'
Cpaapa'	Yes'	No'	C'	Skin'	√'	√'	√'	√'	√'	√'	√'	√'
Cpaapp'	Yes'	No'	C'	Skin'	√'	√'	√'	√'	√'	√'	√'	√'
Cpapaa'	Yes'	No'	C'	Skin'	√'	√'	√'	√'	√'	√'	√'	√'
Cpapap'	Yes'	No'	C'	Skin'	√'	√'	√'	√'	√'	√'	√'	√'
Cpappd'	Yes'	No'	C'	Skin'	√'	√'	√'	√'	√'	√'	√'	√'
ABplpppapap'	Yes'	No'	AB'	Skin'	√'	√'	√'	√'	√'	√'	√'	√'
ABprpppapap'	Yes'	No'	AB'	Skin'	√'	√'	√'	√'	√'	√'	√'	√'
ABplppppppp'	Yes'	No'	AB'	Skin'	√'	√'	√'	√'	√'	√'	√'	√'
ABprppppppp'	Yes'	No'	AB'	Skin'	√'	√'	√'	√'	√'	√'	√'	√'
Cpappv'	Yes'	No'	C'	Skin'	√'	√'	√'	√'	√'	√'	√'	√'
Ealaad'	Yes'	No'	E'	Intestine'	√'	×'	×'	×'	×'	√'	×'	×'
Ealaav'	Yes'	No'	E'	Intestine'	√'	×'	×'	×'	×'	√'	×'	×'
Ealap'	Yes'	No'	E'	Intestine'	√'	√'	√'	√'	√'	√'	√'	√'
Ealpa'	Yes'	No'	E'	Intestine'	√'	√'	√'	√'	√'	√'	√'	√'
Ealpp'	Yes'	No'	E'	Intestine'	√'	√'	√'	√'	√'	√'	√'	√'
Earaad'	Yes'	No'	E'	Intestine'	√'	×'	×'	×'	×'	×'	×'	×'
Earaav'	Yes'	No'	E'	Intestine'	√'	×'	×'	×'	×'	×'	×'	×'
Earap'	Yes'	No'	E'	Intestine'	√'	√'	√'	√'	√'	√'	√'	√'
Earpa'	Yes'	No'	E'	Intestine'	√'	√'	√'	√'	√'	√'	√'	√'
Earpp'	Yes'	No'	E'	Intestine'	√'	√'	√'	√'	√'	√'	√'	√'
Eplaa'	Yes'	No'	E'	Intestine'	√'	√'	√'	√'	√'	√'	√'	√'
Eplap'	Yes'	No'	E'	Intestine'	√'	√'	√'	√'	√'	√'	√'	√'
Eplpa'	Yes'	No'	E'	Intestine'	√'	√'	√'	√'	√'	√'	√'	√'
Eplppa'	Yes'	No'	E'	Intestine'	√'	×'	×'	×'	×'	×'	×'	×'
Eplppp'	Yes'	No'	E'	Intestine'	√'	×'	×'	×'	×'	×'	×'	×'
Epraa'	Yes'	No'	E'	Intestine'	√'	√'	√'	√'	√'	√'	√'	√'
Eprap'	Yes'	No'	E'	Intestine'	√'	√'	√'	√'	√'	√'	√'	√'
Eprpa'	Yes'	No'	E'	Intestine'	√'	√'	√'	√'	√'	√'	√'	√'
Eprppa'	Yes'	No'	E'	Intestine'	√'	×'	×'	×'	×'	×'	×'	×'
Eprppp'	Yes'	No'	E'	Intestine'	√'	×'	×'	×'	×'	×'	×'	×'
ABaraapaaap'	Yes'	No'	AB'	Pharynx'	√'	√'	√'	√'	√'	√'	√'	√'
ABaraappaap'	Yes'	No'	AB'	Pharynx'	√'	√'	√'	√'	√'	√'	√'	√'
ABaraaaaaap'	Yes'	No'	AB'	Pharynx'	√'	√'	√'	√'	√'	√'	√'	√'
ABaraaaaapp'	Yes'	No'	AB'	Pharynx'	√'	√'	√'	√'	√'	√'	√'	√'
ABalpaaaapa'	Yes'	No'	AB'	Pharynx'	√'	√'	√'	√'	√'	√'	√'	√'
ABarapaaapa'	Yes'	No'	AB'	Pharynx'	√'	√'	√'	√'	√'	√'	√'	√'
ABaraapaapa'	Yes'	No'	AB'	Pharynx'	√'	√'	√'	√'	√'	√'	√'	√'
ABaraappapa'	Yes'	No'	AB'	Pharynx'	√'	√'	√'	√'	√'	√'	√'	√'
ABalpaaapaa'	Yes'	No'	AB'	Pharynx'	√'	√'	√'	√'	√'	√'	√'	√'
ABarapaapaa'	Yes'	No'	AB'	Pharynx'	√'	√'	√'	√'	√'	√'	√'	√'
ABalpaaaaap'	Yes'	No'	AB'	Pharynx'	√'	√'	√'	√'	√'	√'	√'	√'
ABarapaaaap'	Yes'	No'	AB'	Pharynx'	√'	√'	√'	√'	√'	√'	√'	√'
MSaaapaaa'	Yes'	No'	MS'	Pharynx'	√'	√'	√'	√'	√'	√'	√'	√'
MSpaaaapa'	Yes'	No'	MS'	Pharynx'	√'	√'	√'	√'	√'	√'	√'	√'
ABalpaapapp'	Yes'	No'	AB'	Pharynx'	√'	√'	√'	√'	√'	√'	√'	√'
ABarapaappa'	Yes'	No'	AB'	Pharynx'	√'	√'	√'	√'	√'	√'	√'	√'
ABalpappppp'	Yes'	No'	AB'	Pharynx'	√'	√'	√'	√'	√'	√'	√'	√'
ABarapapppp'	Yes'	No'	AB'	Pharynx'	√'	√'	√'	√'	√'	√'	√'	√'
MSaaaaapp'	Yes'	No'	MS'	Pharynx'	√'	√'	√'	√'	√'	√'	√'	√'
MSpaaaapp'	Yes'	No'	MS'	Pharynx'	√'	√'	√'	√'	√'	√'	√'	√'
MSaaapaap'	Yes'	No'	MS'	Pharynx'	√'	√'	√'	√'	√'	√'	√'	√'
ABaraaapapp'	Yes'	No'	AB'	Pharynx'	√'	√'	√'	√'	√'	√'	√'	√'
MSaapaaaa'	Yes'	No'	MS'	Pharynx'	√'	√'	√'	√'	√'	√'	√'	√'
MSpapaaaa'	Yes'	No'	MS'	Pharynx'	√'	√'	√'	√'	√'	√'	√'	√'
MSaaaapap'	Yes'	No'	MS'	Pharynx'	√'	√'	√'	√'	√'	√'	√'	√'
MSpaaappa'	Yes'	No'	MS'	Pharynx'	√'	√'	√'	√'	√'	√'	√'	√'
ABaraapapap'	Yes'	No'	AB'	Pharynx'	√'	√'	√'	√'	√'	√'	√'	√'
ABaraapppap'	Yes'	No'	AB'	Pharynx'	√'	√'	√'	√'	√'	√'	√'	√'
MSaapaaap'	Yes'	No'	MS'	Pharynx'	√'	√'	√'	√'	√'	√'	√'	√'
MSpapaaap'	Yes'	No'	MS'	Pharynx'	√'	√'	√'	√'	√'	√'	√'	√'
MSpaaappp'	Yes'	No'	MS'	Pharynx'	√'	√'	√'	√'	√'	√'	√'	√'
MSaapappa'	Yes'	No'	MS'	Pharynx'	√'	√'	√'	√'	√'	√'	√'	√'
MSpapappa'	Yes'	No'	MS'	Pharynx'	√'	√'	√'	√'	√'	√'	√'	√'
MSaaaappp'	Yes'	No'	MS'	Pharynx'	√'	√'	√'	√'	√'	√'	√'	√'
MSaapaapp'	Yes'	No'	MS'	Pharynx'	√'	√'	√'	√'	√'	√'	√'	√'
MSpapaapp'	Yes'	No'	MS'	Pharynx'	√'	√'	√'	√'	√'	√'	√'	√'
MSaaapapp'	Yes'	No'	MS'	Pharynx'	√'	√'	√'	√'	√'	√'	√'	√'
ABalpaapapa'	Yes'	No'	AB'	Pharynx'	√'	√'	√'	√'	√'	√'	√'	√'
ABaraaapapa'	Yes'	No'	AB'	Pharynx'	√'	√'	√'	√'	√'	√'	√'	√'
ABalpappppa'	Yes'	No'	AB'	Pharynx'	√'	√'	√'	√'	√'	√'	√'	√'
ABaraapaapp'	Yes'	No'	AB'	Pharynx'	√'	√'	√'	√'	√'	√'	√'	√'
ABaraappapp'	Yes'	No'	AB'	Pharynx'	√'	√'	√'	√'	√'	√'	√'	√'
ABarapapppa'	Yes'	No'	AB'	Pharynx'	√'	√'	√'	√'	√'	√'	√'	√'
MSaaapapa'	Yes'	No'	MS'	Pharynx'	√'	√'	√'	√'	√'	√'	√'	√'
MSpaapapa'	Yes'	No'	MS'	Pharynx'	√'	√'	√'	√'	√'	√'	√'	√'
ABalpappapp'	Yes'	No'	AB'	Pharynx'	√'	√'	√'	√'	√'	√'	√'	√'
ABplpppppap'	Yes'	No'	AB'	Other'	√'	√'	√'	√'	√'	√'	√'	√'
ABprpppppaa'	Yes'	No'	AB'	Muscle'	√'	√'	√'	√'	√'	√'	√'	√'
Capaaaa'	Yes'	No'	C'	Muscle'	√'	√'	√'	√'	√'	√'	√'	√'
Capaaap'	Yes'	No'	C'	Muscle'	√'	√'	√'	√'	√'	√'	√'	√'
Capaapa'	Yes'	No'	C'	Muscle'	√'	√'	√'	√'	√'	√'	√'	√'
Capaapp'	Yes'	No'	C'	Muscle'	√'	√'	√'	√'	√'	√'	√'	√'
Capapaa'	Yes'	No'	C'	Muscle'	√'	√'	√'	√'	√'	√'	√'	√'
Capapap'	Yes'	No'	C'	Muscle'	√'	√'	√'	√'	√'	√'	√'	√'
Capappa'	Yes'	No'	C'	Muscle'	√'	√'	√'	√'	√'	√'	√'	√'
Capappp'	Yes'	No'	C'	Muscle'	√'	√'	√'	√'	√'	√'	√'	√'
Cappaaa'	Yes'	No'	C'	Muscle'	√'	√'	√'	√'	√'	√'	√'	√'
Cappaap'	Yes'	No'	C'	Muscle'	√'	√'	√'	√'	√'	√'	√'	√'
Cappapa'	Yes'	No'	C'	Muscle'	√'	√'	√'	√'	√'	√'	√'	√'
Cappapp'	Yes'	No'	C'	Muscle'	√'	√'	√'	√'	√'	√'	√'	√'
Capppaa'	Yes'	No'	C'	Muscle'	√'	√'	√'	√'	√'	√'	√'	√'
Capppap'	Yes'	No'	C'	Muscle'	√'	√'	√'	√'	√'	√'	√'	√'
Cappppd'	Yes'	No'	C'	Muscle'	√'	√'	√'	√'	√'	√'	√'	√'
Cappppv'	Yes'	No'	C'	Muscle'	√'	√'	√'	√'	√'	√'	√'	√'
Cppaaaa'	Yes'	No'	C'	Muscle'	√'	√'	√'	√'	√'	√'	√'	√'
Cppaaap'	Yes'	No'	C'	Muscle'	√'	√'	√'	√'	√'	√'	√'	√'
Cppaapa'	Yes'	No'	C'	Muscle'	√'	√'	√'	√'	√'	√'	√'	√'
Cppaapp'	Yes'	No'	C'	Muscle'	√'	√'	√'	√'	√'	√'	√'	√'
Cppapaa'	Yes'	No'	C'	Muscle'	√'	√'	√'	√'	√'	√'	√'	√'
Cppapap'	Yes'	No'	C'	Muscle'	√'	√'	√'	√'	√'	√'	√'	√'
Cppappa'	Yes'	No'	C'	Muscle'	√'	√'	√'	√'	√'	√'	√'	√'
Cppappp'	Yes'	No'	C'	Muscle'	√'	√'	√'	√'	√'	√'	√'	√'
Cpppaaa'	Yes'	No'	C'	Muscle'	√'	√'	√'	√'	√'	√'	√'	√'
Cpppaap'	Yes'	No'	C'	Muscle'	√'	√'	√'	√'	√'	√'	√'	√'
Cpppapa'	Yes'	No'	C'	Muscle'	√'	√'	√'	√'	√'	√'	√'	√'
Cpppapp'	Yes'	No'	C'	Muscle'	√'	√'	√'	√'	√'	√'	√'	√'
Cppppaa'	Yes'	No'	C'	Muscle'	√'	√'	√'	√'	√'	√'	√'	√'
Cppppap'	Yes'	No'	C'	Muscle'	√'	√'	√'	√'	√'	√'	√'	√'
Cpppppd'	Yes'	No'	C'	Muscle'	√'	√'	√'	√'	√'	√'	√'	√'
Cpppppv'	Yes'	No'	C'	Muscle'	√'	√'	√'	√'	√'	√'	√'	√'
Daaaa'	Yes'	No'	D'	Muscle'	√'	√'	√'	√'	√'	√'	√'	√'
Daaap'	Yes'	No'	D'	Muscle'	√'	√'	√'	√'	√'	√'	√'	√'
Daapa'	Yes'	No'	D'	Muscle'	√'	√'	√'	√'	√'	√'	√'	√'
Daapp'	Yes'	No'	D'	Muscle'	√'	√'	√'	√'	√'	√'	√'	√'
Dapaa'	Yes'	No'	D'	Muscle'	√'	√'	√'	√'	√'	√'	√'	√'
Dapap'	Yes'	No'	D'	Muscle'	√'	√'	√'	√'	√'	√'	√'	√'
Dappaa'	Yes'	No'	D'	Muscle'	√'	√'	×'	√'	×'	√'	×'	√'
Dappap'	Yes'	No'	D'	Muscle'	√'	√'	×'	√'	×'	√'	×'	√'
Dapppa'	Yes'	No'	D'	Muscle'	√'	×'	×'	×'	×'	×'	×'	×'
Dapppp'	Yes'	No'	D'	Muscle'	√'	×'	×'	×'	×'	×'	×'	×'
Dpaaa'	Yes'	No'	D'	Muscle'	√'	√'	√'	√'	√'	√'	√'	√'
Dpaap'	Yes'	No'	D'	Muscle'	√'	√'	√'	√'	√'	√'	√'	√'
Dpapa'	Yes'	No'	D'	Muscle'	√'	√'	√'	√'	√'	√'	√'	√'
Dpapp'	Yes'	No'	D'	Muscle'	√'	√'	√'	√'	√'	√'	√'	√'
Dppaa'	Yes'	No'	D'	Muscle'	√'	√'	√'	√'	√'	√'	√'	√'
Dppap'	Yes'	No'	D'	Muscle'	√'	√'	√'	√'	√'	√'	√'	√'
Dpppaa'	Yes'	No'	D'	Muscle'	√'	√'	×'	√'	√'	√'	√'	√'
Dpppap'	Yes'	No'	D'	Muscle'	√'	√'	×'	√'	√'	√'	√'	√'
Dppppa'	Yes'	No'	D'	Muscle'	√'	×'	×'	×'	×'	×'	×'	×'
Dppppp'	Yes'	No'	D'	Muscle'	√'	×'	×'	×'	×'	×'	×'	×'
MSaapppaa'	Yes'	No'	MS'	Muscle'	√'	√'	√'	√'	√'	×'	×'	×'
MSaapppap'	Yes'	No'	MS'	Muscle'	√'	√'	√'	√'	√'	×'	×'	×'
MSaappppa'	Yes'	No'	MS'	Muscle'	√'	×'	×'	×'	×'	×'	×'	×'
MSaappppp'	Yes'	No'	MS'	Muscle'	√'	×'	×'	×'	×'	×'	×'	×'
MSapaaap'	Yes'	No'	MS'	Muscle'	√'	√'	√'	√'	√'	√'	√'	√'
MSapapap'	Yes'	No'	MS'	Muscle'	√'	√'	√'	√'	√'	√'	√'	√'
MSapappa'	Yes'	No'	MS'	Muscle'	√'	√'	√'	√'	√'	√'	√'	√'
MSapappp'	Yes'	No'	MS'	Muscle'	√'	√'	√'	√'	√'	√'	√'	√'
MSappapp'	Yes'	No'	MS'	Muscle'	√'	√'	√'	√'	√'	√'	√'	√'
MSapppaa'	Yes'	No'	MS'	Muscle'	√'	√'	√'	√'	√'	√'	√'	√'
MSapppap'	Yes'	No'	MS'	Muscle'	√'	√'	√'	√'	√'	√'	√'	√'
MSappppa'	Yes'	No'	MS'	Muscle'	√'	√'	√'	√'	√'	√'	√'	√'
MSappppp'	Yes'	No'	MS'	Muscle'	√'	√'	√'	√'	√'	√'	√'	√'
MSpappaa'	Yes'	No'	MS'	Muscle'	√'	√'	√'	√'	√'	√'	√'	√'
MSpappap'	Yes'	No'	MS'	Muscle'	√'	√'	√'	√'	√'	√'	√'	√'
MSpapppaa'	Yes'	No'	MS'	Muscle'	√'	√'	×'	√'	√'	√'	×'	√'
MSpapppap'	Yes'	No'	MS'	Muscle'	√'	√'	×'	√'	√'	√'	×'	√'
MSpappppa'	Yes'	No'	MS'	Muscle'	√'	×'	×'	×'	×'	×'	×'	×'
MSpappppp'	Yes'	No'	MS'	Muscle'	√'	×'	×'	×'	×'	×'	×'	×'
MSppaaap'	Yes'	No'	MS'	Muscle'	√'	√'	√'	√'	√'	√'	√'	√'
MSppapap'	Yes'	No'	MS'	Muscle'	√'	√'	√'	√'	√'	√'	√'	√'
MSppappa'	Yes'	No'	MS'	Muscle'	√'	√'	√'	√'	√'	√'	√'	√'
MSppappp'	Yes'	No'	MS'	Muscle'	√'	√'	√'	√'	√'	√'	√'	√'
MSpppapp'	Yes'	No'	MS'	Muscle'	√'	√'	√'	√'	√'	√'	√'	√'
MSppppaa'	Yes'	No'	MS'	Muscle'	√'	√'	√'	√'	√'	√'	√'	√'
MSppppap'	Yes'	No'	MS'	Muscle'	√'	√'	√'	√'	√'	√'	√'	√'
MSpppppa'	Yes'	No'	MS'	Muscle'	√'	√'	√'	√'	√'	√'	√'	√'
MSpppppp'	Yes'	No'	MS'	Muscle'	√'	√'	√'	√'	√'	√'	√'	√'
ABplpppppaa'	Yes'	No'	AB'	Other'	√'	√'	√'	√'	√'	√'	√'	√'
MSppaapp'	Yes'	No'	MS'	Other'	√'	√'	√'	√'	√'	√'	√'	√'
ABprpppppap'	Yes'	No'	AB'	Other'	√'	√'	√'	√'	√'	√'	√'	√'
ABplpappppp'	Yes'	No'	AB'	Other'	√'	√'	√'	√'	√'	√'	√'	√'
ABplppppaap'	Yes'	No'	AB'	Other'	√'	√'	√'	√'	√'	√'	√'	√'
ABprppppaap'	Yes'	No'	AB'	Other'	√'	√'	√'	√'	√'	√'	√'	√'
ABprpappppp'	Yes'	No'	AB'	Other'	√'	√'	√'	√'	√'	√'	√'	√'
ABprpappppa'	Yes'	No'	AB'	Other'	√'	√'	√'	√'	√'	√'	√'	√'
MSpaapapp'	Yes'	No'	MS'	Other'	√'	√'	√'	√'	√'	√'	√'	√'
MSaapappp'	Yes'	No'	MS'	Other'	√'	√'	√'	√'	√'	√'	√'	√'
MSpapappp'	Yes'	No'	MS'	Other'	√'	√'	√'	√'	√'	√'	√'	√'
MSaappaa'	Yes'	No'	MS'	Other'	√'	√'	√'	√'	√'	√'	√'	√'
MSaaappp'	Yes'	No'	MS'	Other'	√'	√'	√'	√'	√'	√'	√'	√'
MSaappap'	Yes'	No'	MS'	Other'	√'	√'	√'	√'	√'	√'	√'	√'
ABarppaappa'	Yes'	No'	AB'	Neuron'	×'	×'	×'	×'	×'	×'	×'	×'
ABalaaaalar'	Yes'	Yes'	AB'	Death'	√'	√'	√'	√'	√'	√'	√'	√'
ABalppppppap'	Yes'	Yes'	AB'	Death'	√'	√'	√'	√'	√'	√'	×'	√'
ABarapppppap'	Yes'	Yes'	AB'	Death'	×'	×'	×'	×'	×'	×'	×'	×'
ABarpapaapa'	Yes'	Yes'	AB'	Death'	√'	√'	√'	√'	√'	√'	√'	√'
ABplppppppa'	Yes'	Yes'	AB'	Death'	√'	√'	√'	√'	√'	√'	√'	√'
ABprppppppa'	Yes'	Yes'	AB'	Death'	√'	√'	√'	√'	√'	√'	√'	√'
MSappapa'	Yes'	Yes'	MS'	Death'	√'	√'	√'	√'	√'	√'	√'	√'
MSpppapa'	Yes'	Yes'	MS'	Death'	√'	√'	√'	√'	√'	√'	√'	√'
Caapap'	Yes'	Yes'	C'	Death'	√'	√'	√'	√'	√'	√'	√'	√'
ABalaaaalpa'	Yes'	Yes'	AB'	Death'	√'	√'	√'	√'	√'	√'	√'	√'
ABalppppapp'	Yes'	Yes'	AB'	Death'	√'	√'	√'	√'	√'	√'	√'	√'
ABarappapapa'	Yes'	Yes'	AB'	Death'	×'	×'	×'	×'	×'	×'	×'	×'
ABarpapaaap'	Yes'	Yes'	AB'	Death'	√'	√'	√'	√'	√'	√'	√'	√'
ABplapppapa'	Yes'	Yes'	AB'	Death'	√'	√'	√'	√'	√'	√'	√'	√'
ABplpppapp'	Yes'	Yes'	AB'	Death'	√'	√'	√'	√'	√'	√'	√'	√'
ABprapppapa'	Yes'	Yes'	AB'	Death'	√'	√'	√'	√'	√'	√'	√'	√'
ABprpppapp'	Yes'	Yes'	AB'	Death'	√'	√'	√'	√'	√'	√'	√'	√'
MSapaapa'	Yes'	Yes'	MS'	Death'	√'	√'	√'	√'	√'	√'	√'	√'
MSpppaaa'	Yes'	Yes'	MS'	Death'	√'	√'	√'	√'	√'	√'	√'	√'
ABalaaaarla'	Yes'	Yes'	AB'	Death'	√'	√'	√'	√'	√'	√'	√'	√'
ABalppppapap'	Yes'	Yes'	AB'	Death'	√'	×'	×'	×'	×'	×'	×'	×'
ABarappaapp'	Yes'	Yes'	AB'	Death'	√'	√'	√'	√'	√'	√'	√'	√'
ABarpaaapp'	Yes'	Yes'	AB'	Death'	√'	√'	√'	√'	√'	√'	√'	√'
ABplapppaap'	Yes'	Yes'	AB'	Death'	√'	√'	√'	√'	√'	√'	√'	√'
ABplppaapaa'	Yes'	Yes'	AB'	Death'	√'	√'	√'	√'	√'	√'	√'	√'
ABprapppaap'	Yes'	Yes'	AB'	Death'	√'	√'	√'	√'	√'	√'	√'	√'
ABprppaapaa'	Yes'	Yes'	AB'	Death'	√'	√'	√'	√'	√'	√'	√'	√'
MSaapapap'	Yes'	Yes'	MS'	Death'	√'	√'	√'	√'	√'	√'	×'	√'
MSppaapa'	Yes'	Yes'	MS'	Death'	√'	√'	√'	√'	√'	√'	√'	√'
ABalaaaarra'	Yes'	Yes'	AB'	Death'	√'	√'	√'	√'	√'	√'	√'	√'
ABalppppaav'	Yes'	Yes'	AB'	Death'	√'	√'	√'	√'	√'	√'	√'	√'
ABarappaaap'	Yes'	Yes'	AB'	Death'	√'	√'	√'	√'	√'	√'	√'	√'
ABplapappppp'	Yes'	Yes'	AB'	Death'	√'	×'	×'	×'	×'	×'	×'	×'
ABplppaaap'	Yes'	Yes'	AB'	Death'	√'	√'	√'	√'	√'	√'	√'	√'
ABprapappppp'	Yes'	Yes'	AB'	Death'	√'	×'	×'	×'	×'	×'	×'	×'
ABprppaaap'	Yes'	Yes'	AB'	Death'	√'	√'	√'	√'	√'	√'	√'	√'
MSaapaapap'	Yes'	Yes'	MS'	Death'	√'	×'	×'	×'	×'	×'	×'	×'
MSpapapap'	Yes'	Yes'	MS'	Death'	√'	√'	√'	√'	√'	√'	√'	√'
ABalaaaparl'	Yes'	Yes'	AB'	Death'	√'	√'	√'	√'	√'	√'	√'	√'
ABalpppapppp'	Yes'	Yes'	AB'	Death'	√'	×'	×'	×'	×'	×'	×'	×'
ABarapappap'	Yes'	Yes'	AB'	Death'	√'	√'	√'	√'	√'	√'	√'	√'
ABplapapppa'	Yes'	Yes'	AB'	Death'	√'	√'	√'	√'	√'	√'	√'	√'
ABplppaaaapa'	Yes'	Yes'	AB'	Death'	√'	×'	×'	×'	×'	×'	×'	×'
ABprapapppa'	Yes'	Yes'	AB'	Death'	√'	√'	√'	√'	√'	√'	√'	√'
ABprppaaaapa'	Yes'	Yes'	AB'	Death'	√'	×'	×'	×'	×'	×'	×'	×'
MSaaappa'	Yes'	Yes'	MS'	Death'	√'	√'	√'	√'	√'	√'	√'	√'
MSpapaapap'	Yes'	Yes'	MS'	Death'	√'	×'	×'	×'	×'	×'	×'	×'
ABalaaapplr'	Yes'	Yes'	AB'	Death'	√'	√'	√'	√'	√'	√'	√'	√'
ABalpppappa'	Yes'	Yes'	AB'	Death'	√'	√'	√'	√'	√'	√'	√'	√'
ABarapapaapp'	Yes'	Yes'	AB'	Death'	√'	×'	×'	×'	×'	×'	×'	×'
ABplapaaaaa'	Yes'	Yes'	AB'	Death'	√'	√'	√'	√'	√'	√'	√'	√'
ABplpappap'	Yes'	Yes'	AB'	Death'	√'	√'	√'	√'	√'	√'	√'	√'
ABprapaaaaa'	Yes'	Yes'	AB'	Death'	√'	√'	√'	√'	√'	√'	√'	√'
ABprpaappppp'	Yes'	Yes'	AB'	Death'	√'	×'	×'	×'	×'	×'	×'	×'
MSaaaappa'	Yes'	Yes'	MS'	Death'	√'	√'	√'	√'	√'	√'	√'	√'
MSpaapp'	Yes'	Yes'	MS'	Death'	√'	√'	√'	√'	√'	√'	√'	√'
ABalaapaaal'	Yes'	Yes'	AB'	Death'	√'	√'	√'	√'	√'	√'	√'	√'
ABalpppaapv'	Yes'	Yes'	AB'	Death'	√'	√'	√'	√'	√'	√'	√'	√'
ABarapapaaa'	Yes'	Yes'	AB'	Death'	√'	√'	√'	√'	√'	√'	√'	√'
ABplaapapppp'	Yes'	Yes'	AB'	Death'	√'	×'	×'	×'	×'	×'	×'	×'
ABplpaappppp'	Yes'	Yes'	AB'	Death'	√'	×'	×'	×'	×'	×'	×'	×'
ABpraapapppp'	Yes'	Yes'	AB'	Death'	√'	×'	×'	×'	×'	×'	×'	×'
ABprpaapapp'	Yes'	Yes'	AB'	Death'	√'	√'	√'	√'	√'	√'	√'	√'
MSpaapaap'	Yes'	Yes'	MS'	Death'	√'	√'	√'	√'	√'	√'	√'	√'
ABalaapaapa'	Yes'	Yes'	AB'	Death'	√'	√'	√'	√'	√'	√'	√'	√'
ABalppapppap'	Yes'	Yes'	AB'	Death'	×'	×'	×'	×'	×'	×'	×'	×'
ABarapaapap'	Yes'	Yes'	AB'	Death'	√'	√'	√'	√'	√'	√'	√'	√'
ABplaaaaapa'	Yes'	Yes'	AB'	Death'	√'	√'	√'	√'	√'	√'	√'	√'
ABplpaapapp'	Yes'	Yes'	AB'	Death'	√'	√'	√'	√'	√'	√'	√'	√'
ABpraaapppap'	Yes'	Yes'	AB'	Death'	√'	×'	√'	√'	×'	×'	×'	×'
ABprpaaappap'	Yes'	Yes'	AB'	Death'	×'	×'	×'	×'	×'	×'	×'	×'
MSpaaaaap'	Yes'	Yes'	MS'	Death'	√'	√'	√'	√'	√'	√'	√'	√'
ABalaapapa'	Yes'	Yes'	AB'	Death'	√'	√'	√'	√'	√'	√'	√'	√'
ABalppaappa'	Yes'	Yes'	AB'	Death'	√'	√'	√'	√'	√'	√'	√'	√'
ABarapaaapp'	Yes'	Yes'	AB'	Death'	√'	√'	√'	√'	√'	√'	√'	√'
ABplaaaaaap'	Yes'	Yes'	AB'	Death'	√'	√'	√'	√'	√'	√'	√'	√'
ABplpaaappap'	Yes'	Yes'	AB'	Death'	√'	×'	×'	×'	×'	×'	×'	×'
ABpraaapapp'	Yes'	Yes'	AB'	Death'	√'	√'	√'	√'	√'	√'	√'	√'
ABalaapappa'	Yes'	Yes'	AB'	Death'	√'	√'	√'	√'	√'	√'	√'	√'
ABalppaapa'	Yes'	Yes'	AB'	Death'	√'	√'	√'	√'	√'	√'	√'	√'
ABaraapppaad'	Yes'	Yes'	AB'	Death'	×'	×'	×'	×'	×'	×'	×'	×'
ABpraaapapap'	Yes'	Yes'	AB'	Death'	×'	×'	×'	×'	×'	×'	×'	×'
ABalaappaa'	Yes'	Yes'	AB'	Death'	√'	√'	√'	√'	√'	√'	√'	√'
ABalppaaaa'	Yes'	Yes'	AB'	Death'	√'	√'	√'	√'	√'	√'	√'	√'
ABaraapapaad'	Yes'	Yes'	AB'	Death'	×'	×'	×'	×'	×'	×'	×'	×'
ABpraaapaav'	Yes'	Yes'	AB'	Death'	√'	√'	√'	√'	√'	√'	√'	√'
ABalaapppap'	Yes'	Yes'	AB'	Death'	√'	√'	√'	√'	√'	√'	√'	√'
ABalpapppap'	Yes'	Yes'	AB'	Death'	√'	√'	√'	√'	√'	√'	√'	√'
ABaraaaapp'	Yes'	Yes'	AB'	Death'	√'	√'	√'	√'	√'	√'	√'	√'
ABpraaaapppp'	Yes'	Yes'	AB'	Death'	√'	×'	×'	×'	×'	×'	×'	×'
ABalaappppap'	Yes'	Yes'	AB'	Death'	×'	×'	×'	×'	×'	×'	×'	×'
ABalpappaapp'	Yes'	Yes'	AB'	Death'	√'	×'	×'	×'	×'	×'	×'	×'
ABaraaaapaa'	Yes'	Yes'	AB'	Death'	√'	√'	√'	√'	√'	√'	√'	√'
ABpraaaappa'	Yes'	Yes'	AB'	Death'	√'	√'	√'	√'	√'	√'	√'	×'
ABalapaaaap'	Yes'	Yes'	AB'	Death'	√'	√'	√'	√'	√'	√'	√'	√'
ABalpappaaa'	Yes'	Yes'	AB'	Death'	√'	√'	√'	√'	√'	√'	√'	√'
ABpraaaaapv'	Yes'	Yes'	AB'	Death'	√'	√'	√'	√'	√'	√'	√'	√'
ABalapaapap'	Yes'	Yes'	AB'	Death'	√'	√'	√'	√'	√'	√'	√'	√'
ABalpapappa'	Yes'	Yes'	AB'	Death'	√'	√'	√'	√'	√'	√'	√'	√'
ABalapaappap'	Yes'	Yes'	AB'	Death'	×'	×'	×'	×'	×'	×'	×'	×'
ABalpapapapa'	Yes'	Yes'	AB'	Death'	√'	×'	×'	×'	×'	×'	×'	×'
ABalapapaa'	Yes'	Yes'	AB'	Death'	√'	√'	√'	√'	√'	√'	√'	√'
ABalpapaapp'	Yes'	Yes'	AB'	Death'	√'	√'	√'	√'	√'	√'	√'	√'
ABalapapapap'	Yes'	Yes'	AB'	Death'	√'	×'	×'	×'	×'	×'	×'	×'
ABalpaaappa'	Yes'	Yes'	AB'	Death'	√'	√'	√'	√'	√'	√'	√'	√'
ABalapappaap'	Yes'	Yes'	AB'	Death'	√'	×'	×'	×'	×'	×'	×'	×'
ABalpaaapap'	Yes'	Yes'	AB'	Death'	√'	√'	√'	√'	√'	√'	√'	√'
ABalappaaa'	Yes'	Yes'	AB'	Death'	√'	√'	√'	√'	√'	√'	√'	√'
ABalpaaaapp'	Yes'	Yes'	AB'	Death'	√'	√'	√'	√'	√'	√'	√'	√'
ABalappaapp'	Yes'	Yes'	AB'	Death'	√'	√'	√'	√'	√'	√'	√'	√'
ABalappapap'	Yes'	Yes'	AB'	Death'	√'	√'	√'	√'	√'	√'	√'	√'
ABalapppapap'	Yes'	Yes'	AB'	Death'	√'	×'	×'	×'	×'	×'	×'	×'
ABalappppaap'	Yes'	Yes'	AB'	Death'	√'	×'	×'	×'	×'	×'	×'	×'
ABa'	No'	No'	AB'	Unspecified'	√'	√'	√'	√'	√'	√'	√'	√'
ABal'	No'	No'	AB'	Unspecified'	√'	√'	√'	√'	√'	√'	√'	√'
ABala'	No'	No'	AB'	Unspecified'	√'	√'	√'	√'	√'	√'	√'	√'
ABalaa'	No'	No'	AB'	Unspecified'	√'	√'	√'	√'	√'	√'	√'	√'
ABalaaa'	No'	No'	AB'	Unspecified'	√'	√'	√'	√'	√'	√'	√'	√'
ABalaaaa'	No'	No'	AB'	Unspecified'	√'	√'	√'	√'	√'	√'	√'	√'
ABalaaaal'	No'	No'	AB'	Unspecified'	√'	√'	√'	√'	√'	√'	√'	√'
ABalaaaala'	No'	No'	AB'	Unspecified'	√'	√'	√'	√'	√'	√'	√'	√'
ABp'	No'	No'	AB'	Unspecified'	√'	√'	√'	√'	√'	√'	√'	√'
ABar'	No'	No'	AB'	Unspecified'	√'	√'	√'	√'	√'	√'	√'	√'
ABalp'	No'	No'	AB'	Unspecified'	√'	√'	√'	√'	√'	√'	√'	√'
ABalap'	No'	No'	AB'	Unspecified'	√'	√'	√'	√'	√'	√'	√'	√'
ABalaap'	No'	No'	AB'	Unspecified'	√'	√'	√'	√'	√'	√'	√'	√'
ABalaaap'	No'	No'	AB'	Unspecified'	√'	√'	√'	√'	√'	√'	√'	√'
ABalaaaar'	No'	No'	AB'	Unspecified'	√'	√'	√'	√'	√'	√'	√'	√'
ABalaaaalp'	No'	No'	AB'	Unspecified'	√'	√'	√'	√'	√'	√'	√'	√'
ABpl'	No'	No'	AB'	Unspecified'	√'	√'	√'	√'	√'	√'	√'	√'
ABara'	No'	No'	AB'	Unspecified'	√'	√'	√'	√'	√'	√'	√'	√'
ABalpa'	No'	No'	AB'	Unspecified'	√'	√'	√'	√'	√'	√'	√'	√'
ABalapa'	No'	No'	AB'	Unspecified'	√'	√'	√'	√'	√'	√'	√'	√'
ABalaapa'	No'	No'	AB'	Unspecified'	√'	√'	√'	√'	√'	√'	√'	√'
ABalaaapa'	No'	No'	AB'	Unspecified'	√'	√'	√'	√'	√'	√'	√'	√'
ABalaaaarl'	No'	No'	AB'	Unspecified'	√'	√'	√'	√'	√'	√'	√'	√'
ABpr'	No'	No'	AB'	Unspecified'	√'	√'	√'	√'	√'	√'	√'	√'
ABarp'	No'	No'	AB'	Unspecified'	√'	√'	√'	√'	√'	√'	√'	√'
ABalpp'	No'	No'	AB'	Unspecified'	√'	√'	√'	√'	√'	√'	√'	√'
ABalapp'	No'	No'	AB'	Unspecified'	√'	√'	√'	√'	√'	√'	√'	√'
ABalaapp'	No'	No'	AB'	Unspecified'	√'	√'	√'	√'	√'	√'	√'	√'
ABalaaapp'	No'	No'	AB'	Unspecified'	√'	√'	√'	√'	√'	√'	√'	√'
ABalaaaarr'	No'	No'	AB'	Unspecified'	√'	√'	√'	√'	√'	√'	√'	√'
ABpla'	No'	No'	AB'	Unspecified'	√'	√'	√'	√'	√'	√'	√'	√'
ABaraa'	No'	No'	AB'	Unspecified'	√'	√'	√'	√'	√'	√'	√'	√'
ABalpaa'	No'	No'	AB'	Unspecified'	√'	√'	√'	√'	√'	√'	√'	√'
ABalapaa'	No'	No'	AB'	Unspecified'	√'	√'	√'	√'	√'	√'	√'	√'
ABalaapaa'	No'	No'	AB'	Unspecified'	√'	√'	√'	√'	√'	√'	√'	√'
ABalaaapal'	No'	No'	AB'	Neuron'	√'	√'	√'	√'	√'	√'	√'	√'
ABplp'	No'	No'	AB'	Unspecified'	√'	√'	√'	√'	√'	√'	√'	√'
ABarap'	No'	No'	AB'	Unspecified'	√'	√'	√'	√'	√'	√'	√'	√'
ABalpap'	No'	No'	AB'	Unspecified'	√'	√'	√'	√'	√'	√'	√'	√'
ABalapap'	No'	No'	AB'	Unspecified'	√'	√'	√'	√'	√'	√'	√'	√'
ABalaapap'	No'	No'	AB'	Unspecified'	√'	√'	√'	√'	√'	√'	√'	√'
ABalaaapar'	No'	No'	AB'	Unspecified'	√'	√'	√'	√'	√'	√'	√'	√'
ABpra'	No'	No'	AB'	Unspecified'	√'	√'	√'	√'	√'	√'	√'	√'
ABarpa'	No'	No'	AB'	Unspecified'	√'	√'	√'	√'	√'	√'	√'	√'
ABalppa'	No'	No'	AB'	Unspecified'	√'	√'	√'	√'	√'	√'	√'	√'
ABalappa'	No'	No'	AB'	Unspecified'	√'	√'	√'	√'	√'	√'	√'	√'
ABalaappa'	No'	No'	AB'	Unspecified'	√'	√'	√'	√'	√'	√'	√'	√'
ABalaaappl'	No'	No'	AB'	Unspecified'	√'	√'	√'	√'	√'	√'	√'	√'
ABprp'	No'	No'	AB'	Unspecified'	√'	√'	√'	√'	√'	√'	√'	√'
ABarpp'	No'	No'	AB'	Unspecified'	√'	√'	√'	√'	√'	√'	√'	√'
ABalppp'	No'	No'	AB'	Unspecified'	√'	√'	√'	√'	√'	√'	√'	√'
ABalappp'	No'	No'	AB'	Unspecified'	√'	√'	√'	√'	√'	√'	√'	√'
ABalaappp'	No'	No'	AB'	Unspecified'	√'	√'	√'	√'	√'	√'	√'	√'
ABalaaappr'	No'	No'	AB'	Neuron'	√'	√'	√'	√'	√'	√'	√'	√'
ABplaa'	No'	No'	AB'	Unspecified'	√'	√'	√'	√'	√'	√'	√'	√'
ABaraaa'	No'	No'	AB'	Unspecified'	√'	√'	√'	√'	√'	√'	√'	√'
ABalpaaa'	No'	No'	AB'	Unspecified'	√'	√'	√'	√'	√'	√'	√'	√'
ABalapaaa'	No'	No'	AB'	Unspecified'	√'	√'	√'	√'	√'	√'	√'	√'
ABalaapaaa'	No'	No'	AB'	Unspecified'	√'	√'	√'	√'	√'	√'	√'	√'
ABplap'	No'	No'	AB'	Unspecified'	√'	√'	√'	√'	√'	√'	√'	√'
ABaraap'	No'	No'	AB'	Unspecified'	√'	√'	√'	√'	√'	√'	√'	√'
ABalpaap'	No'	No'	AB'	Unspecified'	√'	√'	√'	√'	√'	√'	√'	√'
ABalapaap'	No'	No'	AB'	Unspecified'	√'	√'	√'	√'	√'	√'	√'	√'
ABalaapaap'	No'	No'	AB'	Unspecified'	√'	√'	√'	√'	√'	√'	√'	√'
ABplpa'	No'	No'	AB'	Unspecified'	√'	√'	√'	√'	√'	√'	√'	√'
ABarapa'	No'	No'	AB'	Unspecified'	√'	√'	√'	√'	√'	√'	√'	√'
ABalpapa'	No'	No'	AB'	Unspecified'	√'	√'	√'	√'	√'	√'	√'	√'
ABalapapa'	No'	No'	AB'	Unspecified'	√'	√'	√'	√'	√'	√'	√'	√'
ABplpp'	No'	No'	AB'	Unspecified'	√'	√'	√'	√'	√'	√'	√'	√'
ABarapp'	No'	No'	AB'	Unspecified'	√'	√'	√'	√'	√'	√'	√'	√'
ABalpapp'	No'	No'	AB'	Unspecified'	√'	√'	√'	√'	√'	√'	√'	√'
ABalapapp'	No'	No'	AB'	Unspecified'	√'	√'	√'	√'	√'	√'	√'	√'
ABalaapapp'	No'	No'	AB'	Unspecified'	√'	√'	√'	√'	√'	√'	√'	√'
ABpraa'	No'	No'	AB'	Unspecified'	√'	√'	√'	√'	√'	√'	√'	√'
ABarpaa'	No'	No'	AB'	Unspecified'	√'	√'	√'	√'	√'	√'	√'	√'
ABalppaa'	No'	No'	AB'	Unspecified'	√'	√'	√'	√'	√'	√'	√'	√'
ABalappaa'	No'	No'	AB'	Unspecified'	√'	√'	√'	√'	√'	√'	√'	√'
ABprap'	No'	No'	AB'	Unspecified'	√'	√'	√'	√'	√'	√'	√'	√'
ABarpap'	No'	No'	AB'	Unspecified'	√'	√'	√'	√'	√'	√'	√'	√'
ABalppap'	No'	No'	AB'	Unspecified'	√'	√'	√'	√'	√'	√'	√'	√'
ABalappap'	No'	No'	AB'	Unspecified'	√'	√'	√'	√'	√'	√'	√'	√'
ABalaappap'	No'	No'	AB'	Neuron'	√'	√'	√'	√'	√'	√'	√'	√'
ABprpa'	No'	No'	AB'	Unspecified'	√'	√'	√'	√'	√'	√'	√'	√'
ABarppa'	No'	No'	AB'	Unspecified'	√'	√'	√'	√'	√'	√'	√'	√'
ABalpppa'	No'	No'	AB'	Unspecified'	√'	√'	√'	√'	√'	√'	√'	√'
ABalapppa'	No'	No'	AB'	Unspecified'	√'	√'	√'	√'	√'	√'	√'	√'
ABalaapppa'	No'	No'	AB'	Unspecified'	√'	√'	√'	√'	√'	√'	√'	√'
ABprpp'	No'	No'	AB'	Unspecified'	√'	√'	√'	√'	√'	√'	√'	√'
ABarppp'	No'	No'	AB'	Unspecified'	√'	√'	√'	√'	√'	√'	√'	√'
ABalpppp'	No'	No'	AB'	Unspecified'	√'	√'	√'	√'	√'	√'	√'	√'
ABalapppp'	No'	No'	AB'	Unspecified'	√'	√'	√'	√'	√'	√'	√'	√'
ABalaapppp'	No'	No'	AB'	Unspecified'	√'	√'	√'	√'	√'	√'	√'	√'
ABplaaa'	No'	No'	AB'	Unspecified'	√'	√'	√'	√'	√'	√'	√'	√'
ABaraaaa'	No'	No'	AB'	Unspecified'	√'	√'	√'	√'	√'	√'	√'	√'
ABalpaaaa'	No'	No'	AB'	Unspecified'	√'	√'	√'	√'	√'	√'	√'	√'
ABalapaaaa'	No'	No'	AB'	Unspecified'	√'	√'	√'	√'	√'	√'	√'	√'
ABplaap'	No'	No'	AB'	Unspecified'	√'	√'	√'	√'	√'	√'	√'	√'
ABaraaap'	No'	No'	AB'	Unspecified'	√'	√'	√'	√'	√'	√'	√'	√'
ABalpaaap'	No'	No'	AB'	Unspecified'	√'	√'	√'	√'	√'	√'	√'	√'
ABalapaaap'	No'	No'	AB'	Neuron'	√'	√'	√'	√'	√'	√'	√'	√'
ABplapa'	No'	No'	AB'	Unspecified'	√'	√'	√'	√'	√'	√'	√'	√'
ABaraapa'	No'	No'	AB'	Unspecified'	√'	√'	√'	√'	√'	√'	√'	√'
ABalpaapa'	No'	No'	AB'	Unspecified'	√'	√'	√'	√'	√'	√'	√'	√'
ABalapaapa'	No'	No'	AB'	Unspecified'	√'	√'	√'	√'	√'	√'	√'	√'
ABplapp'	No'	No'	AB'	Unspecified'	√'	√'	√'	√'	√'	√'	√'	√'
ABaraapp'	No'	No'	AB'	Unspecified'	√'	√'	√'	√'	√'	√'	√'	√'
ABalpaapp'	No'	No'	AB'	Skin'	√'	√'	√'	√'	√'	√'	√'	√'
ABalapaapp'	No'	No'	AB'	Unspecified'	√'	√'	√'	√'	√'	√'	√'	√'
ABplpaa'	No'	No'	AB'	Unspecified'	√'	√'	√'	√'	√'	√'	√'	√'
ABarapaa'	No'	No'	AB'	Unspecified'	√'	√'	√'	√'	√'	√'	√'	√'
ABalpapaa'	No'	No'	AB'	Unspecified'	√'	√'	√'	√'	√'	√'	√'	√'
ABplpap'	No'	No'	AB'	Unspecified'	√'	√'	√'	√'	√'	√'	√'	√'
ABarapap'	No'	No'	AB'	Unspecified'	√'	√'	√'	√'	√'	√'	√'	√'
ABalpapap'	No'	No'	AB'	Unspecified'	√'	√'	√'	√'	√'	√'	√'	√'
ABalapapap'	No'	No'	AB'	Unspecified'	√'	√'	√'	√'	√'	√'	√'	√'
ABplppa'	No'	No'	AB'	Unspecified'	√'	√'	√'	√'	√'	√'	√'	√'
ABarappa'	No'	No'	AB'	Unspecified'	√'	√'	√'	√'	√'	√'	√'	√'
ABalpappa'	No'	No'	AB'	Unspecified'	√'	√'	√'	√'	√'	√'	√'	√'
ABalapappa'	No'	No'	AB'	Unspecified'	√'	√'	√'	√'	√'	√'	√'	√'
ABplppp'	No'	No'	AB'	Unspecified'	√'	√'	√'	√'	√'	√'	√'	√'
ABarappp'	No'	No'	AB'	Unspecified'	√'	√'	√'	√'	√'	√'	√'	√'
ABalpappp'	No'	No'	AB'	Unspecified'	√'	√'	√'	√'	√'	√'	√'	√'
ABalapappp'	No'	No'	AB'	Neuron'	√'	√'	√'	√'	√'	√'	√'	√'
ABpraaa'	No'	No'	AB'	Unspecified'	√'	√'	√'	√'	√'	√'	√'	√'
ABarpaaa'	No'	No'	AB'	Unspecified'	√'	√'	√'	√'	√'	√'	√'	√'
ABalppaaa'	No'	No'	AB'	Unspecified'	√'	√'	√'	√'	√'	√'	√'	√'
ABpraap'	No'	No'	AB'	Unspecified'	√'	√'	√'	√'	√'	√'	√'	√'
ABarpaap'	No'	No'	AB'	Skin'	√'	√'	√'	√'	√'	√'	√'	√'
ABalppaap'	No'	No'	AB'	Unspecified'	√'	√'	√'	√'	√'	√'	√'	√'
ABalappaap'	No'	No'	AB'	Unspecified'	√'	√'	√'	√'	√'	√'	√'	√'
ABprapa'	No'	No'	AB'	Unspecified'	√'	√'	√'	√'	√'	√'	√'	√'
ABarpapa'	No'	No'	AB'	Unspecified'	√'	√'	√'	√'	√'	√'	√'	√'
ABalppapa'	No'	No'	AB'	Neuron'	√'	√'	√'	√'	√'	√'	√'	√'
ABalappapa'	No'	No'	AB'	Unspecified'	√'	√'	√'	√'	√'	√'	√'	√'
ABprapp'	No'	No'	AB'	Unspecified'	√'	√'	√'	√'	√'	√'	√'	√'
ABarpapp'	No'	No'	AB'	Skin'	√'	√'	√'	√'	√'	√'	√'	√'
ABalppapp'	No'	No'	AB'	Unspecified'	√'	√'	√'	√'	√'	√'	√'	√'
ABalappapp'	No'	No'	AB'	Neuron'	√'	√'	√'	√'	√'	√'	√'	√'
ABprpaa'	No'	No'	AB'	Unspecified'	√'	√'	√'	√'	√'	√'	√'	√'
ABarppaa'	No'	No'	AB'	Unspecified'	√'	√'	√'	√'	√'	√'	√'	√'
ABalpppaa'	No'	No'	AB'	Unspecified'	√'	√'	√'	√'	√'	√'	√'	√'
ABalapppaa'	No'	No'	AB'	Neuron'	√'	√'	√'	√'	√'	√'	√'	√'
ABprpap'	No'	No'	AB'	Unspecified'	√'	√'	√'	√'	√'	√'	√'	√'
ABarppap'	No'	No'	AB'	Skin'	√'	√'	√'	√'	√'	√'	√'	√'
ABalpppap'	No'	No'	AB'	Unspecified'	√'	√'	√'	√'	√'	√'	√'	√'
ABalapppap'	No'	No'	AB'	Unspecified'	√'	√'	√'	√'	√'	√'	√'	√'
ABprppa'	No'	No'	AB'	Unspecified'	√'	√'	√'	√'	√'	√'	√'	√'
ABarpppa'	No'	No'	AB'	Unspecified'	√'	√'	√'	√'	√'	√'	√'	√'
ABalppppa'	No'	No'	AB'	Unspecified'	√'	√'	√'	√'	√'	√'	√'	√'
ABalappppa'	No'	No'	AB'	Unspecified'	√'	√'	√'	√'	√'	√'	√'	√'
ABalaappppa'	No'	No'	AB'	Unspecified'	√'	√'	√'	√'	√'	√'	√'	√'
ABprppp'	No'	No'	AB'	Unspecified'	√'	√'	√'	√'	√'	√'	√'	√'
ABarpppp'	No'	No'	AB'	Skin'	√'	√'	√'	√'	√'	√'	√'	√'
ABalppppp'	No'	No'	AB'	Unspecified'	√'	√'	√'	√'	√'	√'	√'	√'
ABalappppp'	No'	No'	AB'	Neuron'	√'	√'	√'	√'	√'	√'	√'	√'
ABplaaaa'	No'	No'	AB'	Unspecified'	√'	√'	√'	√'	√'	√'	√'	√'
ABaraaaaa'	No'	No'	AB'	Pharynx'	√'	√'	√'	√'	√'	√'	√'	√'
ABalpaaaaa'	No'	No'	AB'	Pharynx'	√'	√'	√'	√'	√'	√'	√'	√'
ABplaaap'	No'	No'	AB'	Skin'	√'	√'	√'	√'	√'	√'	√'	√'
ABaraaaap'	No'	No'	AB'	Unspecified'	√'	√'	√'	√'	√'	√'	√'	√'
ABalpaaaap'	No'	No'	AB'	Unspecified'	√'	√'	√'	√'	√'	√'	√'	√'
ABplaapa'	No'	No'	AB'	Unspecified'	√'	√'	√'	√'	√'	√'	√'	√'
ABaraaapa'	No'	No'	AB'	Unspecified'	√'	√'	√'	√'	√'	√'	√'	√'
ABalpaaapa'	No'	No'	AB'	Unspecified'	√'	√'	√'	√'	√'	√'	√'	√'
ABplaapp'	No'	No'	AB'	Skin'	√'	√'	√'	√'	√'	√'	√'	√'
ABaraaapp'	No'	No'	AB'	Skin'	√'	√'	√'	√'	√'	√'	√'	√'
ABalpaaapp'	No'	No'	AB'	Unspecified'	√'	√'	√'	√'	√'	√'	√'	√'
ABplapaa'	No'	No'	AB'	Unspecified'	√'	√'	√'	√'	√'	√'	√'	√'
ABaraapaa'	No'	No'	AB'	Pharynx'	√'	√'	√'	√'	√'	√'	√'	√'
ABalpaapaa'	No'	No'	AB'	Unspecified'	√'	√'	√'	√'	√'	√'	√'	√'
ABplapap'	No'	No'	AB'	Unspecified'	√'	√'	√'	√'	√'	√'	√'	√'
ABaraapap'	No'	No'	AB'	Unspecified'	√'	√'	√'	√'	√'	√'	√'	√'
ABalpaapap'	No'	No'	AB'	Pharynx'	√'	√'	√'	√'	√'	√'	√'	√'
ABplappa'	No'	No'	AB'	Skin'	√'	√'	√'	√'	√'	√'	√'	√'
ABaraappa'	No'	No'	AB'	Pharynx'	√'	√'	√'	√'	√'	√'	√'	√'
ABalpaappa'	No'	No'	AB'	Skin'	√'	√'	√'	√'	√'	√'	√'	√'
ABalapaappa'	No'	No'	AB'	Unspecified'	√'	√'	√'	√'	√'	√'	√'	√'
ABplappp'	No'	No'	AB'	Unspecified'	√'	√'	√'	√'	√'	√'	√'	√'
ABaraappp'	No'	No'	AB'	Unspecified'	√'	√'	√'	√'	√'	√'	√'	√'
ABalpaappp'	No'	No'	AB'	Skin'	√'	√'	√'	√'	√'	√'	√'	√'
ABplpaaa'	No'	No'	AB'	Unspecified'	√'	√'	√'	√'	√'	√'	√'	√'
ABarapaaa'	No'	No'	AB'	Unspecified'	√'	√'	√'	√'	√'	√'	√'	√'
ABalpapaaa'	No'	No'	AB'	Unspecified'	√'	√'	√'	√'	√'	√'	√'	√'
ABplpaap'	No'	No'	AB'	Unspecified'	√'	√'	√'	√'	√'	√'	√'	√'
ABarapaap'	No'	No'	AB'	Unspecified'	√'	√'	√'	√'	√'	√'	√'	√'
ABalpapaap'	No'	No'	AB'	Unspecified'	√'	√'	√'	√'	√'	√'	√'	√'
ABplpapa'	No'	No'	AB'	Unspecified'	√'	√'	√'	√'	√'	√'	√'	√'
ABarapapa'	No'	No'	AB'	Unspecified'	√'	√'	√'	√'	√'	√'	√'	√'
ABalpapapa'	No'	No'	AB'	Unspecified'	√'	√'	√'	√'	√'	√'	√'	√'
ABalapapapa'	No'	No'	AB'	Unspecified'	√'	√'	√'	√'	√'	√'	√'	√'
ABplpapp'	No'	No'	AB'	Unspecified'	√'	√'	√'	√'	√'	√'	√'	√'
ABarapapp'	No'	No'	AB'	Unspecified'	√'	√'	√'	√'	√'	√'	√'	√'
ABalpapapp'	No'	No'	AB'	Unspecified'	√'	√'	√'	√'	√'	√'	√'	√'
ABplppaa'	No'	No'	AB'	Unspecified'	√'	√'	√'	√'	√'	√'	√'	√'
ABarappaa'	No'	No'	AB'	Unspecified'	√'	√'	√'	√'	√'	√'	√'	√'
ABalpappaa'	No'	No'	AB'	Unspecified'	√'	√'	√'	√'	√'	√'	√'	√'
ABalapappaa'	No'	No'	AB'	Unspecified'	√'	√'	√'	√'	√'	√'	√'	√'
ABplppap'	No'	No'	AB'	Neuron'	√'	√'	√'	√'	√'	√'	√'	√'
ABarappap'	No'	No'	AB'	Unspecified'	√'	√'	√'	√'	√'	√'	√'	√'
ABalpappap'	No'	No'	AB'	Pharynx'	√'	√'	√'	√'	√'	√'	√'	√'
ABplpppa'	No'	No'	AB'	Unspecified'	√'	√'	√'	√'	√'	√'	√'	√'
ABarapppa'	No'	No'	AB'	Neuron'	√'	√'	√'	√'	√'	√'	√'	√'
ABalpapppa'	No'	No'	AB'	Unspecified'	√'	√'	√'	√'	√'	√'	√'	√'
ABplpppp'	No'	No'	AB'	Unspecified'	√'	√'	√'	√'	√'	√'	√'	√'
ABarapppp'	No'	No'	AB'	Unspecified'	√'	√'	√'	√'	√'	√'	√'	√'
ABalpapppp'	No'	No'	AB'	Pharynx'	√'	√'	√'	√'	√'	√'	√'	√'
ABpraaaa'	No'	No'	AB'	Unspecified'	√'	√'	√'	√'	√'	√'	√'	√'
ABarpaaaa'	No'	No'	AB'	Neuron'	√'	√'	√'	√'	√'	√'	√'	√'
ABpraaap'	No'	No'	AB'	Unspecified'	√'	√'	√'	√'	√'	√'	√'	√'
ABarpaaap'	No'	No'	AB'	Unspecified'	√'	√'	√'	√'	√'	√'	√'	√'
ABalppaaap'	No'	No'	AB'	Neuron'	√'	√'	√'	√'	√'	√'	√'	√'
ABpraapa'	No'	No'	AB'	Unspecified'	√'	√'	√'	√'	√'	√'	√'	√'
ABarpaapa'	No'	No'	AB'	Skin'	√'	√'	√'	√'	√'	√'	√'	√'
ABpraapp'	No'	No'	AB'	Skin'	√'	√'	√'	√'	√'	√'	√'	√'
ABarpaapp'	No'	No'	AB'	Skin'	√'	√'	√'	√'	√'	√'	√'	√'
ABalppaapp'	No'	No'	AB'	Unspecified'	√'	√'	√'	√'	√'	√'	√'	√'
ABprapaa'	No'	No'	AB'	Unspecified'	√'	√'	√'	√'	√'	√'	√'	√'
ABarpapaa'	No'	No'	AB'	Unspecified'	√'	√'	√'	√'	√'	√'	√'	√'
ABalppapaa'	No'	No'	AB'	Neuron'	√'	√'	√'	√'	√'	√'	√'	√'
ABprapap'	No'	No'	AB'	Unspecified'	√'	√'	√'	√'	√'	√'	√'	√'
ABarpapap'	No'	No'	AB'	Skin'	√'	√'	√'	√'	√'	√'	√'	√'
ABalppapap'	No'	No'	AB'	Neuron'	√'	√'	√'	√'	√'	√'	√'	√'
ABprappa'	No'	No'	AB'	Skin'	√'	√'	√'	√'	√'	√'	√'	√'
ABarpappa'	No'	No'	AB'	Skin'	√'	√'	√'	√'	√'	√'	√'	√'
ABalppappa'	No'	No'	AB'	Neuron'	√'	√'	√'	√'	√'	√'	√'	√'
ABprappp'	No'	No'	AB'	Unspecified'	√'	√'	√'	√'	√'	√'	√'	√'
ABarpappp'	No'	No'	AB'	Skin'	√'	√'	√'	√'	√'	√'	√'	√'
ABalppappp'	No'	No'	AB'	Unspecified'	√'	√'	√'	√'	√'	√'	√'	√'
ABprpaaa'	No'	No'	AB'	Unspecified'	√'	√'	√'	√'	√'	√'	√'	√'
ABarppaaa'	No'	No'	AB'	Unspecified'	√'	√'	√'	√'	√'	√'	√'	√'
ABalpppaaa'	No'	No'	AB'	Neuron'	√'	√'	√'	√'	√'	√'	√'	√'
ABprpaap'	No'	No'	AB'	Unspecified'	√'	√'	√'	√'	√'	√'	√'	√'
ABarppaap'	No'	No'	AB'	Unspecified'	√'	√'	√'	√'	√'	√'	√'	√'
ABalpppaap'	No'	No'	AB'	Unspecified'	√'	√'	√'	√'	√'	√'	√'	√'
ABprpapa'	No'	No'	AB'	Unspecified'	√'	√'	√'	√'	√'	√'	√'	√'
ABarppapa'	No'	No'	AB'	Skin'	√'	√'	√'	√'	√'	√'	√'	√'
ABalpppapa'	No'	No'	AB'	Neuron'	√'	√'	√'	√'	√'	√'	√'	√'
ABalapppapa'	No'	No'	AB'	Unspecified'	√'	√'	√'	√'	√'	√'	√'	√'
ABprpapp'	No'	No'	AB'	Unspecified'	√'	√'	√'	√'	√'	√'	√'	√'
ABarppapp'	No'	No'	AB'	Skin'	√'	√'	√'	√'	√'	√'	√'	√'
ABalpppapp'	No'	No'	AB'	Unspecified'	√'	√'	√'	√'	√'	√'	√'	√'
ABprppaa'	No'	No'	AB'	Unspecified'	√'	√'	√'	√'	√'	√'	√'	√'
ABarpppaa'	No'	No'	AB'	Unspecified'	√'	√'	√'	√'	√'	√'	√'	√'
ABalppppaa'	No'	No'	AB'	Unspecified'	√'	√'	√'	√'	√'	√'	√'	√'
ABalappppaa'	No'	No'	AB'	Unspecified'	√'	√'	√'	√'	√'	√'	√'	√'
ABprppap'	No'	No'	AB'	Neuron'	√'	√'	√'	√'	√'	√'	√'	√'
ABarpppap'	No'	No'	AB'	Unspecified'	√'	√'	√'	√'	√'	√'	√'	√'
ABalppppap'	No'	No'	AB'	Unspecified'	√'	√'	√'	√'	√'	√'	√'	√'
ABprpppa'	No'	No'	AB'	Unspecified'	√'	√'	√'	√'	√'	√'	√'	√'
ABarppppa'	No'	No'	AB'	Skin'	√'	√'	√'	√'	√'	√'	√'	√'
ABalpppppa'	No'	No'	AB'	Neuron'	√'	√'	√'	√'	√'	√'	√'	√'
ABprpppp'	No'	No'	AB'	Unspecified'	√'	√'	√'	√'	√'	√'	√'	√'
ABarppppp'	No'	No'	AB'	Skin'	√'	√'	√'	√'	√'	√'	√'	√'
ABalpppppp'	No'	No'	AB'	Unspecified'	√'	√'	√'	√'	√'	√'	√'	√'
ABplaaaaa'	No'	No'	AB'	Unspecified'	√'	√'	√'	√'	√'	√'	√'	√'
ABaraaaaaa'	No'	No'	AB'	Pharynx'	√'	√'	√'	√'	√'	√'	√'	√'
ABplaaaap'	No'	No'	AB'	Skin'	√'	√'	√'	√'	√'	√'	√'	√'
ABaraaaaap'	No'	No'	AB'	Pharynx'	√'	√'	√'	√'	√'	√'	√'	√'
ABplaaapa'	No'	No'	AB'	Skin'	√'	√'	√'	√'	√'	√'	√'	√'
ABaraaaapa'	No'	No'	AB'	Unspecified'	√'	√'	√'	√'	√'	√'	√'	√'
ABplaaapp'	No'	No'	AB'	Skin'	√'	√'	√'	√'	√'	√'	√'	√'
ABplaapaa'	No'	No'	AB'	Unspecified'	√'	√'	√'	√'	√'	√'	√'	√'
ABaraaapaa'	No'	No'	AB'	Unspecified'	√'	√'	√'	√'	√'	√'	√'	√'
ABplaapap'	No'	No'	AB'	Unspecified'	√'	√'	√'	√'	√'	√'	√'	√'
ABaraaapap'	No'	No'	AB'	Pharynx'	√'	√'	√'	√'	√'	√'	√'	√'
ABplaappa'	No'	No'	AB'	Skin'	√'	√'	√'	√'	√'	√'	√'	√'
ABaraaappa'	No'	No'	AB'	Skin'	√'	√'	√'	√'	√'	√'	√'	√'
ABplaappp'	No'	No'	AB'	Skin'	√'	√'	√'	√'	√'	√'	√'	√'
ABaraaappp'	No'	No'	AB'	Skin'	√'	√'	√'	√'	√'	√'	√'	√'
ABplapaaa'	No'	No'	AB'	Unspecified'	√'	√'	√'	√'	√'	√'	√'	√'
ABaraapaaa'	No'	No'	AB'	Pharynx'	√'	√'	√'	√'	√'	√'	√'	√'
ABplapaap'	No'	No'	AB'	Unspecified'	√'	√'	√'	√'	√'	√'	√'	√'
ABaraapaap'	No'	No'	AB'	Pharynx'	√'	√'	√'	√'	√'	√'	√'	√'
ABplapapa'	No'	No'	AB'	Unspecified'	√'	√'	√'	√'	√'	√'	√'	√'
ABaraapapa'	No'	No'	AB'	Unspecified'	√'	√'	√'	√'	√'	√'	√'	√'
ABplapapp'	No'	No'	AB'	Unspecified'	√'	√'	√'	√'	√'	√'	√'	√'
ABaraapapp'	No'	No'	AB'	Pharynx'	√'	√'	√'	√'	√'	√'	√'	√'
ABplappaa'	No'	No'	AB'	Skin'	√'	√'	√'	√'	√'	√'	√'	√'
ABaraappaa'	No'	No'	AB'	Pharynx'	√'	√'	√'	√'	√'	√'	√'	√'
ABplappap'	No'	No'	AB'	Skin'	√'	√'	√'	√'	√'	√'	√'	√'
ABaraappap'	No'	No'	AB'	Pharynx'	√'	√'	√'	√'	√'	√'	√'	√'
ABplapppa'	No'	No'	AB'	Unspecified'	√'	√'	√'	√'	√'	√'	√'	√'
ABaraapppa'	No'	No'	AB'	Unspecified'	√'	√'	√'	√'	√'	√'	√'	√'
ABplapppp'	No'	No'	AB'	Skin'	√'	√'	√'	√'	√'	√'	√'	√'
ABaraapppp'	No'	No'	AB'	Pharynx'	√'	√'	√'	√'	√'	√'	√'	√'
ABplpaaaa'	No'	No'	AB'	Unspecified'	√'	√'	√'	√'	√'	√'	√'	√'
ABarapaaaa'	No'	No'	AB'	Pharynx'	√'	√'	√'	√'	√'	√'	√'	√'
ABplpaaap'	No'	No'	AB'	Unspecified'	√'	√'	√'	√'	√'	√'	√'	√'
ABarapaaap'	No'	No'	AB'	Unspecified'	√'	√'	√'	√'	√'	√'	√'	√'
ABplpaapa'	No'	No'	AB'	Unspecified'	√'	√'	√'	√'	√'	√'	√'	√'
ABarapaapa'	No'	No'	AB'	Unspecified'	√'	√'	√'	√'	√'	√'	√'	√'
ABplpaapp'	No'	No'	AB'	Unspecified'	√'	√'	√'	√'	√'	√'	√'	√'
ABarapaapp'	No'	No'	AB'	Pharynx'	√'	√'	√'	√'	√'	√'	√'	√'
ABplpapaa'	No'	No'	AB'	Neuron'	√'	√'	√'	√'	√'	√'	√'	√'
ABarapapaa'	No'	No'	AB'	Unspecified'	√'	√'	√'	√'	√'	√'	√'	√'
ABplpapap'	No'	No'	AB'	Unspecified'	√'	√'	√'	√'	√'	√'	√'	√'
ABarapapap'	No'	No'	AB'	Unspecified'	√'	√'	√'	√'	√'	√'	√'	√'
ABalpapapap'	No'	No'	AB'	Unspecified'	√'	√'	√'	√'	√'	√'	√'	√'
ABplpappa'	No'	No'	AB'	Unspecified'	√'	√'	√'	√'	√'	√'	√'	√'
ABarapappa'	No'	No'	AB'	Unspecified'	√'	√'	√'	√'	√'	√'	√'	√'
ABplpappp'	No'	No'	AB'	Unspecified'	√'	√'	√'	√'	√'	√'	√'	√'
ABarapappp'	No'	No'	AB'	Pharynx'	√'	√'	√'	√'	√'	√'	√'	√'
ABplppaaa'	No'	No'	AB'	Unspecified'	√'	√'	√'	√'	√'	√'	√'	√'
ABarappaaa'	No'	No'	AB'	Unspecified'	√'	√'	√'	√'	√'	√'	√'	√'
ABplppaap'	No'	No'	AB'	Unspecified'	√'	√'	√'	√'	√'	√'	√'	√'
ABarappaap'	No'	No'	AB'	Unspecified'	√'	√'	√'	√'	√'	√'	√'	√'
ABalpappaap'	No'	No'	AB'	Unspecified'	√'	√'	√'	√'	√'	√'	√'	√'
ABplppapa'	No'	No'	AB'	Neuron'	√'	√'	√'	√'	√'	√'	√'	√'
ABarappapa'	No'	No'	AB'	Unspecified'	√'	√'	√'	√'	√'	√'	√'	√'
ABplppapp'	No'	No'	AB'	Neuron'	√'	√'	√'	√'	√'	√'	√'	√'
ABarappapp'	No'	No'	AB'	Neuron'	√'	√'	√'	√'	√'	√'	√'	√'
ABplpppaa'	No'	No'	AB'	Neuron'	√'	√'	√'	√'	√'	√'	√'	√'
ABarapppaa'	No'	No'	AB'	Neuron'	√'	√'	√'	√'	√'	√'	√'	√'
ABplpppap'	No'	No'	AB'	Unspecified'	√'	√'	√'	√'	√'	√'	√'	√'
ABarapppap'	No'	No'	AB'	Neuron'	√'	√'	√'	√'	√'	√'	√'	√'
ABplppppa'	No'	No'	AB'	Unspecified'	√'	√'	√'	√'	√'	√'	√'	√'
ABarappppa'	No'	No'	AB'	Neuron'	√'	√'	√'	√'	√'	√'	√'	√'
ABplppppp'	No'	No'	AB'	Unspecified'	√'	√'	√'	√'	√'	√'	√'	√'
ABarappppp'	No'	No'	AB'	Unspecified'	√'	√'	√'	√'	√'	√'	√'	√'
ABpraaaaa'	No'	No'	AB'	Unspecified'	√'	√'	√'	√'	√'	√'	√'	√'
ABarpaaaaa'	No'	No'	AB'	Neuron'	√'	√'	√'	√'	√'	√'	√'	√'
ABpraaaap'	No'	No'	AB'	Unspecified'	√'	√'	√'	√'	√'	√'	√'	√'
ABarpaaaap'	No'	No'	AB'	Neuron'	√'	√'	√'	√'	√'	√'	√'	√'
ABpraaapa'	No'	No'	AB'	Unspecified'	√'	√'	√'	√'	√'	√'	√'	√'
ABarpaaapa'	No'	No'	AB'	Neuron'	√'	√'	√'	√'	√'	√'	√'	√'
ABpraaapp'	No'	No'	AB'	Unspecified'	√'	√'	√'	√'	√'	√'	√'	√'
ABpraapaa'	No'	No'	AB'	Unspecified'	√'	√'	√'	√'	√'	√'	√'	√'
ABpraapap'	No'	No'	AB'	Unspecified'	√'	√'	√'	√'	√'	√'	√'	√'
ABpraappa'	No'	No'	AB'	Skin'	√'	√'	√'	√'	√'	√'	√'	√'
ABpraappp'	No'	No'	AB'	Skin'	√'	√'	√'	√'	√'	√'	√'	√'
ABprapaaa'	No'	No'	AB'	Unspecified'	√'	√'	√'	√'	√'	√'	√'	√'
ABarpapaaa'	No'	No'	AB'	Unspecified'	√'	√'	√'	√'	√'	√'	√'	√'
ABprapaap'	No'	No'	AB'	Unspecified'	√'	√'	√'	√'	√'	√'	√'	√'
ABarpapaap'	No'	No'	AB'	Unspecified'	√'	√'	√'	√'	√'	√'	√'	√'
ABprapapa'	No'	No'	AB'	Unspecified'	√'	√'	√'	√'	√'	√'	√'	√'
ABprapapp'	No'	No'	AB'	Unspecified'	√'	√'	√'	√'	√'	√'	√'	√'
ABprappaa'	No'	No'	AB'	Skin'	√'	√'	√'	√'	√'	√'	√'	√'
ABprappap'	No'	No'	AB'	Skin'	√'	√'	√'	√'	√'	√'	√'	√'
ABprapppa'	No'	No'	AB'	Unspecified'	√'	√'	√'	√'	√'	√'	√'	√'
ABalppapppa'	No'	No'	AB'	Unspecified'	√'	√'	√'	√'	√'	√'	√'	√'
ABprapppp'	No'	No'	AB'	Skin'	√'	√'	√'	√'	√'	√'	√'	√'
ABprpaaaa'	No'	No'	AB'	Unspecified'	√'	√'	√'	√'	√'	√'	√'	√'
ABprpaaap'	No'	No'	AB'	Unspecified'	√'	√'	√'	√'	√'	√'	√'	√'
ABprpaapa'	No'	No'	AB'	Unspecified'	√'	√'	√'	√'	√'	√'	√'	√'
ABprpaapp'	No'	No'	AB'	Unspecified'	√'	√'	√'	√'	√'	√'	√'	√'
ABarppaapp'	No'	No'	AB'	Neuron'	√'	√'	√'	√'	√'	√'	√'	√'
ABprpapaa'	No'	No'	AB'	Neuron'	√'	√'	√'	√'	√'	√'	√'	√'
ABprpapap'	No'	No'	AB'	Unspecified'	√'	√'	√'	√'	√'	√'	√'	√'
ABprpappa'	No'	No'	AB'	Neuron'	√'	√'	√'	√'	√'	√'	√'	√'
ABprpappp'	No'	No'	AB'	Unspecified'	√'	√'	√'	√'	√'	√'	√'	√'
ABalpppappp'	No'	No'	AB'	Unspecified'	√'	√'	√'	√'	√'	√'	√'	√'
ABprppaaa'	No'	No'	AB'	Unspecified'	√'	√'	√'	√'	√'	√'	√'	√'
ABprppaap'	No'	No'	AB'	Unspecified'	√'	√'	√'	√'	√'	√'	√'	√'
ABprppapa'	No'	No'	AB'	Neuron'	√'	√'	√'	√'	√'	√'	√'	√'
ABalppppapa'	No'	No'	AB'	Unspecified'	√'	√'	√'	√'	√'	√'	√'	√'
ABprppapp'	No'	No'	AB'	Neuron'	√'	√'	√'	√'	√'	√'	√'	√'
ABarpppapp'	No'	No'	AB'	Neuron'	√'	√'	√'	√'	√'	√'	√'	√'
ABprpppaa'	No'	No'	AB'	Unspecified'	√'	√'	√'	√'	√'	√'	√'	√'
ABprpppap'	No'	No'	AB'	Unspecified'	√'	√'	√'	√'	√'	√'	√'	√'
ABprppppa'	No'	No'	AB'	Unspecified'	√'	√'	√'	√'	√'	√'	√'	√'
ABalppppppa'	No'	No'	AB'	Unspecified'	√'	√'	√'	√'	√'	√'	√'	√'
ABprppppp'	No'	No'	AB'	Unspecified'	√'	√'	√'	√'	√'	√'	√'	√'
ABalppppppp'	No'	No'	AB'	Neuron'	√'	√'	√'	√'	√'	√'	√'	√'
ABplaaaaaa'	No'	No'	AB'	Unspecified'	√'	√'	√'	√'	√'	√'	√'	√'
ABplaaaaap'	No'	No'	AB'	Unspecified'	√'	√'	√'	√'	√'	√'	√'	√'
ABplaapaaa'	No'	No'	AB'	Unspecified'	√'	√'	√'	√'	√'	√'	√'	√'
ABplaapaap'	No'	No'	AB'	Neuron'	√'	√'	√'	√'	√'	√'	√'	√'
ABplaapapa'	No'	No'	AB'	Neuron'	√'	√'	√'	√'	√'	√'	√'	√'
ABplaapapp'	No'	No'	AB'	Unspecified'	√'	√'	√'	√'	√'	√'	√'	√'
ABplapaaaa'	No'	No'	AB'	Unspecified'	√'	√'	√'	√'	√'	√'	√'	√'
ABplapaaap'	No'	No'	AB'	Neuron'	√'	√'	√'	√'	√'	√'	√'	√'
ABplapapaa'	No'	No'	AB'	Unspecified'	√'	√'	√'	√'	√'	√'	√'	√'
ABaraapapaa'	No'	No'	AB'	Unspecified'	√'	√'	√'	√'	√'	√'	√'	√'
ABplapappp'	No'	No'	AB'	Unspecified'	√'	√'	√'	√'	√'	√'	√'	√'
ABplapppaa'	No'	No'	AB'	Unspecified'	√'	√'	√'	√'	√'	√'	√'	√'
ABaraapppaa'	No'	No'	AB'	Unspecified'	√'	√'	√'	√'	√'	√'	√'	√'
ABplapppap'	No'	No'	AB'	Unspecified'	√'	√'	√'	√'	√'	√'	√'	√'
ABplpaaaaa'	No'	No'	AB'	Neuron'	√'	√'	√'	√'	√'	√'	√'	√'
ABplpaaaap'	No'	No'	AB'	Unspecified'	√'	√'	√'	√'	√'	√'	√'	√'
ABplpaaapa'	No'	No'	AB'	Neuron'	√'	√'	√'	√'	√'	√'	√'	√'
ABplpaaapp'	No'	No'	AB'	Unspecified'	√'	√'	√'	√'	√'	√'	√'	√'
ABplpaapaa'	No'	No'	AB'	Neuron'	√'	√'	√'	√'	√'	√'	√'	√'
ABplpaapap'	No'	No'	AB'	Unspecified'	√'	√'	√'	√'	√'	√'	√'	√'
ABplpaappa'	No'	No'	AB'	Neuron'	√'	√'	√'	√'	√'	√'	√'	√'
ABplpaappp'	No'	No'	AB'	Unspecified'	√'	√'	√'	√'	√'	√'	√'	√'
ABplpapaaa'	No'	No'	AB'	Neuron'	√'	√'	√'	√'	√'	√'	√'	√'
ABplpapaap'	No'	No'	AB'	Neuron'	√'	√'	√'	√'	√'	√'	√'	√'
ABarapapaap'	No'	No'	AB'	Unspecified'	√'	√'	√'	√'	√'	√'	√'	√'
ABplpapapa'	No'	No'	AB'	Unspecified'	√'	√'	√'	√'	√'	√'	√'	√'
ABplpapapp'	No'	No'	AB'	Neuron'	√'	√'	√'	√'	√'	√'	√'	√'
ABplpappaa'	No'	No'	AB'	Unspecified'	√'	√'	√'	√'	√'	√'	√'	√'
ABplpapppa'	No'	No'	AB'	Other'	√'	√'	√'	√'	√'	√'	√'	√'
ABplpapppp'	No'	No'	AB'	Unspecified'	√'	√'	√'	√'	√'	√'	√'	√'
ABplppaaaa'	No'	No'	AB'	Unspecified'	√'	√'	√'	√'	√'	√'	√'	√'
ABplppaapa'	No'	No'	AB'	Unspecified'	√'	√'	√'	√'	√'	√'	√'	√'
ABplppaapp'	No'	No'	AB'	Neuron'	√'	√'	√'	√'	√'	√'	√'	√'
ABplppapaa'	No'	No'	AB'	Neuron'	√'	√'	√'	√'	√'	√'	√'	√'
ABplppapap'	No'	No'	AB'	Neuron'	√'	√'	√'	√'	√'	√'	√'	√'
ABarappapap'	No'	No'	AB'	Unspecified'	√'	√'	√'	√'	√'	√'	√'	√'
ABplppappa'	No'	No'	AB'	Neuron'	√'	√'	√'	√'	√'	√'	√'	√'
ABplppappp'	No'	No'	AB'	Neuron'	√'	√'	√'	√'	√'	√'	√'	√'
ABplpppaaa'	No'	No'	AB'	Neuron'	√'	√'	√'	√'	√'	√'	√'	√'
ABplpppaap'	No'	No'	AB'	Neuron'	√'	√'	√'	√'	√'	√'	√'	√'
ABplpppapa'	No'	No'	AB'	Unspecified'	√'	√'	√'	√'	√'	√'	√'	√'
ABplppppaa'	No'	No'	AB'	Unspecified'	√'	√'	√'	√'	√'	√'	√'	√'
ABplppppap'	No'	No'	AB'	Other'	√'	√'	√'	√'	√'	√'	√'	√'
ABplpppppa'	No'	No'	AB'	Other'	√'	√'	√'	√'	√'	√'	√'	√'
ABarapppppa'	No'	No'	AB'	Unspecified'	√'	√'	√'	√'	√'	√'	√'	√'
ABplpppppp'	No'	No'	AB'	Unspecified'	√'	√'	√'	√'	√'	√'	√'	√'
ABpraaaaaa'	No'	No'	AB'	Neuron'	√'	√'	√'	√'	√'	√'	√'	√'
ABpraaaaap'	No'	No'	AB'	Unspecified'	√'	√'	√'	√'	√'	√'	√'	√'
ABpraaaapa'	No'	No'	AB'	Neuron'	√'	√'	√'	√'	√'	√'	√'	√'
ABpraaaapp'	No'	No'	AB'	Unspecified'	√'	√'	√'	√'	√'	√'	√'	√'
ABpraaapaa'	No'	No'	AB'	Unspecified'	√'	√'	√'	√'	√'	√'	√'	√'
ABpraaapap'	No'	No'	AB'	Unspecified'	√'	√'	√'	√'	√'	√'	√'	√'
ABpraaappa'	No'	No'	AB'	Neuron'	√'	√'	√'	√'	√'	√'	√'	√'
ABpraaappp'	No'	No'	AB'	Unspecified'	√'	√'	√'	√'	√'	√'	√'	√'
ABpraapaaa'	No'	No'	AB'	Unspecified'	√'	√'	√'	√'	√'	√'	√'	√'
ABpraapaap'	No'	No'	AB'	Neuron'	√'	√'	√'	√'	√'	√'	√'	√'
ABpraapapa'	No'	No'	AB'	Neuron'	√'	√'	√'	√'	√'	√'	√'	√'
ABpraapapp'	No'	No'	AB'	Unspecified'	√'	√'	√'	√'	√'	√'	√'	√'
ABprapaaaa'	No'	No'	AB'	Unspecified'	√'	√'	√'	√'	√'	√'	√'	√'
ABprapaaap'	No'	No'	AB'	Neuron'	√'	√'	√'	√'	√'	√'	√'	√'
ABarpapaapp'	No'	No'	AB'	Neuron'	√'	√'	√'	√'	√'	√'	√'	√'
ABprapapaa'	No'	No'	AB'	Unspecified'	√'	√'	√'	√'	√'	√'	√'	√'
ABprapappp'	No'	No'	AB'	Unspecified'	√'	√'	√'	√'	√'	√'	√'	√'
ABprapppaa'	No'	No'	AB'	Unspecified'	√'	√'	√'	√'	√'	√'	√'	√'
ABprapppap'	No'	No'	AB'	Unspecified'	√'	√'	√'	√'	√'	√'	√'	√'
ABprpaaaaa'	No'	No'	AB'	Neuron'	√'	√'	√'	√'	√'	√'	√'	√'
ABprpaaaap'	No'	No'	AB'	Unspecified'	√'	√'	√'	√'	√'	√'	√'	√'
ABprpaaapa'	No'	No'	AB'	Neuron'	√'	√'	√'	√'	√'	√'	√'	√'
ABprpaaapp'	No'	No'	AB'	Unspecified'	√'	√'	√'	√'	√'	√'	√'	√'
ABprpaapaa'	No'	No'	AB'	Neuron'	√'	√'	√'	√'	√'	√'	√'	√'
ABprpaapap'	No'	No'	AB'	Unspecified'	√'	√'	√'	√'	√'	√'	√'	√'
ABprpaappa'	No'	No'	AB'	Neuron'	√'	√'	√'	√'	√'	√'	√'	√'
ABprpaappp'	No'	No'	AB'	Unspecified'	√'	√'	√'	√'	√'	√'	√'	√'
ABprpapaaa'	No'	No'	AB'	Neuron'	√'	√'	√'	√'	√'	√'	√'	√'
ABprpapaap'	No'	No'	AB'	Neuron'	√'	√'	√'	√'	√'	√'	√'	√'
ABprpapapa'	No'	No'	AB'	Unspecified'	√'	√'	√'	√'	√'	√'	√'	√'
ABprpapapp'	No'	No'	AB'	Neuron'	√'	√'	√'	√'	√'	√'	√'	√'
ABprpappaa'	No'	No'	AB'	Neuron'	√'	√'	√'	√'	√'	√'	√'	√'
ABprpappap'	No'	No'	AB'	Neuron'	√'	√'	√'	√'	√'	√'	√'	√'
ABprpapppa'	No'	No'	AB'	Neuron'	√'	√'	√'	√'	√'	√'	√'	√'
ABprpapppp'	No'	No'	AB'	Other'	√'	√'	√'	√'	√'	√'	√'	√'
ABprppaaaa'	No'	No'	AB'	Unspecified'	√'	√'	√'	√'	√'	√'	√'	√'
ABprppaapa'	No'	No'	AB'	Unspecified'	√'	√'	√'	√'	√'	√'	√'	√'
ABprppaapp'	No'	No'	AB'	Neuron'	√'	√'	√'	√'	√'	√'	√'	√'
ABprppapaa'	No'	No'	AB'	Neuron'	√'	√'	√'	√'	√'	√'	√'	√'
ABprppapap'	No'	No'	AB'	Neuron'	√'	√'	√'	√'	√'	√'	√'	√'
ABprppappa'	No'	No'	AB'	Neuron'	√'	√'	√'	√'	√'	√'	√'	√'
ABprppappp'	No'	No'	AB'	Neuron'	√'	√'	√'	√'	√'	√'	√'	√'
ABprpppaaa'	No'	No'	AB'	Unspecified'	√'	√'	√'	√'	√'	√'	√'	√'
ABprpppaap'	No'	No'	AB'	Neuron'	√'	√'	√'	√'	√'	√'	√'	√'
ABprpppapa'	No'	No'	AB'	Unspecified'	√'	√'	√'	√'	√'	√'	√'	√'
ABprppppaa'	No'	No'	AB'	Unspecified'	√'	√'	√'	√'	√'	√'	√'	√'
ABprppppap'	No'	No'	AB'	Unspecified'	√'	√'	√'	√'	√'	√'	√'	√'
ABprpppppa'	No'	No'	AB'	Unspecified'	√'	√'	√'	√'	√'	√'	√'	√'
ABprpppppp'	No'	No'	AB'	Unspecified'	√'	√'	√'	√'	√'	√'	√'	√'
ABplaaaaapp'	No'	No'	AB'	Neuron'	√'	√'	√'	√'	√'	√'	√'	√'
ABplaapappp'	No'	No'	AB'	Unspecified'	√'	√'	√'	√'	√'	√'	√'	√'
ABplapaaaap'	No'	No'	AB'	Neuron'	√'	√'	√'	√'	√'	√'	√'	√'
ABplapaaapa'	No'	No'	AB'	Neuron'	√'	√'	√'	√'	√'	√'	√'	√'
ABplapapppp'	No'	No'	AB'	Unspecified'	√'	√'	√'	√'	√'	√'	√'	√'
ABplapppapp'	No'	No'	AB'	Neuron'	√'	√'	√'	√'	√'	√'	√'	√'
ABplpaaappa'	No'	No'	AB'	Unspecified'	√'	√'	√'	√'	√'	√'	√'	√'
ABplpaapppp'	No'	No'	AB'	Unspecified'	√'	√'	√'	√'	√'	√'	√'	√'
ABplppaaaap'	No'	No'	AB'	Unspecified'	√'	√'	√'	√'	√'	√'	√'	√'
ABplppapaaa'	No'	No'	AB'	Neuron'	√'	√'	√'	√'	√'	√'	√'	√'
ABplpppaapa'	No'	No'	AB'	Neuron'	√'	√'	√'	√'	√'	√'	√'	√'
ABpraaaappp'	No'	No'	AB'	Unspecified'	√'	√'	√'	√'	√'	√'	√'	×'
ABpraaapapa'	No'	No'	AB'	Unspecified'	√'	√'	√'	√'	√'	√'	√'	√'
ABpraaapppa'	No'	No'	AB'	Unspecified'	√'	√'	√'	√'	√'	√'	√'	√'
ABpraaapppp'	No'	No'	AB'	Neuron'	√'	√'	√'	√'	√'	√'	√'	√'
ABpraapappp'	No'	No'	AB'	Unspecified'	√'	√'	√'	√'	√'	√'	√'	√'
ABprapaaaap'	No'	No'	AB'	Neuron'	√'	√'	√'	√'	√'	√'	√'	√'
ABprapaaapa'	No'	No'	AB'	Neuron'	√'	√'	√'	√'	√'	√'	√'	√'
ABprapapppp'	No'	No'	AB'	Unspecified'	√'	√'	√'	√'	√'	√'	√'	√'
ABprapppapp'	No'	No'	AB'	Neuron'	√'	√'	√'	√'	√'	√'	√'	√'
ABprpaaappa'	No'	No'	AB'	Unspecified'	√'	√'	√'	√'	√'	√'	√'	√'
ABprpaapppp'	No'	No'	AB'	Unspecified'	√'	√'	√'	√'	√'	√'	√'	√'
ABprppaaaap'	No'	No'	AB'	Unspecified'	√'	√'	√'	√'	√'	√'	√'	√'
ABprppapaaa'	No'	No'	AB'	Neuron'	√'	√'	√'	√'	√'	√'	√'	√'
ABprpppaapa'	No'	No'	AB'	Neuron'	√'	√'	√'	√'	√'	√'	√'	√'
ABplapappppa'	No'	No'	AB'	Neuron'	√'	×'	×'	×'	×'	×'	×'	×'
ABprapappppa'	No'	No'	AB'	Neuron'	√'	×'	×'	×'	×'	×'	×'	×'
MS'	No'	No'	MS'	Unspecified'	√'	√'	√'	√'	√'	√'	√'	√'
MSa'	No'	No'	MS'	Unspecified'	√'	√'	√'	√'	√'	√'	√'	√'
MSaa'	No'	No'	MS'	Unspecified'	√'	√'	√'	√'	√'	√'	√'	√'
MSaaa'	No'	No'	MS'	Unspecified'	√'	√'	√'	√'	√'	√'	√'	√'
MSaaaa'	No'	No'	MS'	Unspecified'	√'	√'	√'	√'	√'	√'	√'	√'
MSaaaaa'	No'	No'	MS'	Unspecified'	√'	√'	√'	√'	√'	√'	√'	√'
MSaaaaaa'	No'	No'	MS'	Other'	√'	√'	√'	√'	√'	√'	√'	√'
MSp'	No'	No'	MS'	Unspecified'	√'	√'	√'	√'	√'	√'	√'	√'
MSap'	No'	No'	MS'	Unspecified'	√'	√'	√'	√'	√'	√'	√'	√'
MSaap'	No'	No'	MS'	Unspecified'	√'	√'	√'	√'	√'	√'	√'	√'
MSaaap'	No'	No'	MS'	Unspecified'	√'	√'	√'	√'	√'	√'	√'	√'
MSaaaap'	No'	No'	MS'	Unspecified'	√'	√'	√'	√'	√'	√'	√'	√'
MSaaaaap'	No'	No'	MS'	Pharynx'	√'	√'	√'	√'	√'	√'	√'	√'
MSpa'	No'	No'	MS'	Unspecified'	√'	√'	√'	√'	√'	√'	√'	√'
MSapa'	No'	No'	MS'	Unspecified'	√'	√'	√'	√'	√'	√'	√'	√'
MSaapa'	No'	No'	MS'	Unspecified'	√'	√'	√'	√'	√'	√'	√'	√'
MSaaapa'	No'	No'	MS'	Pharynx'	√'	√'	√'	√'	√'	√'	√'	√'
MSaaaapa'	No'	No'	MS'	Pharynx'	√'	√'	√'	√'	√'	√'	√'	√'
MSaaaaapa'	No'	No'	MS'	Pharynx'	√'	√'	√'	√'	√'	√'	√'	√'
MSpp'	No'	No'	MS'	Unspecified'	√'	√'	√'	√'	√'	√'	√'	√'
MSapp'	No'	No'	MS'	Unspecified'	√'	√'	√'	√'	√'	√'	√'	√'
MSaapp'	No'	No'	MS'	Unspecified'	√'	√'	√'	√'	√'	√'	√'	√'
MSaaapp'	No'	No'	MS'	Unspecified'	√'	√'	√'	√'	√'	√'	√'	√'
MSaaaapp'	No'	No'	MS'	Unspecified'	√'	√'	√'	√'	√'	√'	√'	√'
MSpaa'	No'	No'	MS'	Unspecified'	√'	√'	√'	√'	√'	√'	√'	√'
MSapaa'	No'	No'	MS'	Unspecified'	√'	√'	√'	√'	√'	√'	√'	√'
MSaapaa'	No'	No'	MS'	Unspecified'	√'	√'	√'	√'	√'	√'	√'	√'
MSaaapaa'	No'	No'	MS'	Pharynx'	√'	√'	√'	√'	√'	√'	√'	√'
MSpap'	No'	No'	MS'	Unspecified'	√'	√'	√'	√'	√'	√'	√'	√'
MSapap'	No'	No'	MS'	Unspecified'	√'	√'	√'	√'	√'	√'	√'	√'
MSaapap'	No'	No'	MS'	Unspecified'	√'	√'	√'	√'	√'	√'	√'	√'
MSaaapap'	No'	No'	MS'	Pharynx'	√'	√'	√'	√'	√'	√'	√'	√'
MSppa'	No'	No'	MS'	Unspecified'	√'	√'	√'	√'	√'	√'	√'	√'
MSappa'	No'	No'	MS'	Unspecified'	√'	√'	√'	√'	√'	√'	√'	√'
MSaappa'	No'	No'	MS'	Other'	√'	√'	√'	√'	√'	√'	√'	√'
MSppp'	No'	No'	MS'	Unspecified'	√'	√'	√'	√'	√'	√'	√'	√'
MSappp'	No'	No'	MS'	Muscle'	√'	√'	√'	√'	√'	√'	√'	√'
MSaappp'	No'	No'	MS'	Muscle'	√'	√'	√'	√'	√'	√'	√'	√'
MSpaaa'	No'	No'	MS'	Unspecified'	√'	√'	√'	√'	√'	√'	√'	√'
MSapaaa'	No'	No'	MS'	Unspecified'	√'	√'	√'	√'	√'	√'	√'	√'
MSaapaaa'	No'	No'	MS'	Pharynx'	√'	√'	√'	√'	√'	√'	√'	√'
MSpaap'	No'	No'	MS'	Unspecified'	√'	√'	√'	√'	√'	√'	√'	√'
MSapaap'	No'	No'	MS'	Unspecified'	√'	√'	√'	√'	√'	√'	√'	√'
MSaapaap'	No'	No'	MS'	Unspecified'	√'	√'	√'	√'	√'	√'	√'	√'
MSpapa'	No'	No'	MS'	Unspecified'	√'	√'	√'	√'	√'	√'	√'	√'
MSapapa'	No'	No'	MS'	Unspecified'	√'	√'	√'	√'	√'	√'	√'	√'
MSaapapa'	No'	No'	MS'	Unspecified'	√'	√'	√'	√'	√'	√'	√'	√'
MSpapp'	No'	No'	MS'	Muscle'	√'	√'	√'	√'	√'	√'	√'	√'
MSapapp'	No'	No'	MS'	Muscle'	√'	√'	√'	√'	√'	√'	√'	√'
MSaapapp'	No'	No'	MS'	Unspecified'	√'	√'	√'	√'	√'	√'	√'	√'
MSppaa'	No'	No'	MS'	Unspecified'	√'	√'	√'	√'	√'	√'	√'	√'
MSappaa'	No'	No'	MS'	Other'	√'	√'	√'	√'	√'	√'	√'	√'
MSppap'	No'	No'	MS'	Unspecified'	√'	√'	√'	√'	√'	√'	√'	√'
MSappap'	No'	No'	MS'	Unspecified'	√'	√'	√'	√'	√'	√'	√'	√'
MSpppa'	No'	No'	MS'	Unspecified'	√'	√'	√'	√'	√'	√'	√'	√'
MSapppa'	No'	No'	MS'	Muscle'	√'	√'	√'	√'	√'	√'	√'	√'
MSaapppa'	No'	No'	MS'	Muscle'	√'	√'	√'	√'	√'	√'	√'	√'
MSpppp'	No'	No'	MS'	Muscle'	√'	√'	√'	√'	√'	√'	√'	√'
MSapppp'	No'	No'	MS'	Muscle'	√'	√'	√'	√'	√'	√'	√'	√'
MSaapppp'	No'	No'	MS'	Muscle'	√'	√'	√'	√'	√'	√'	√'	√'
MSpaaaa'	No'	No'	MS'	Unspecified'	√'	√'	√'	√'	√'	√'	√'	√'
MSapaaaa'	No'	No'	MS'	Other'	√'	√'	√'	√'	√'	√'	√'	√'
MSpaaap'	No'	No'	MS'	Pharynx'	√'	√'	√'	√'	√'	√'	√'	√'
MSpaapa'	No'	No'	MS'	Unspecified'	√'	√'	√'	√'	√'	√'	√'	√'
MSaapaapa'	No'	No'	MS'	Unspecified'	√'	√'	√'	√'	√'	√'	√'	√'
MSpapaa'	No'	No'	MS'	Unspecified'	√'	√'	√'	√'	√'	√'	√'	√'
MSapapaa'	No'	No'	MS'	Other'	√'	√'	√'	√'	√'	√'	√'	√'
MSpapap'	No'	No'	MS'	Unspecified'	√'	√'	√'	√'	√'	√'	√'	√'
MSpappa'	No'	No'	MS'	Muscle'	√'	√'	√'	√'	√'	√'	√'	√'
MSpappp'	No'	No'	MS'	Muscle'	√'	√'	√'	√'	√'	√'	√'	√'
MSppaaa'	No'	No'	MS'	Unspecified'	√'	√'	√'	√'	√'	√'	√'	√'
MSppaap'	No'	No'	MS'	Unspecified'	√'	√'	√'	√'	√'	√'	√'	√'
MSppapa'	No'	No'	MS'	Unspecified'	√'	√'	√'	√'	√'	√'	√'	√'
MSppapp'	No'	No'	MS'	Muscle'	√'	√'	√'	√'	√'	√'	√'	√'
MSpppaa'	No'	No'	MS'	Unspecified'	√'	√'	√'	√'	√'	√'	√'	√'
MSpppap'	No'	No'	MS'	Unspecified'	√'	√'	√'	√'	√'	√'	√'	√'
MSppppa'	No'	No'	MS'	Muscle'	√'	√'	√'	√'	√'	√'	√'	√'
MSppppp'	No'	No'	MS'	Muscle'	√'	√'	√'	√'	√'	√'	√'	√'
MSpaaaaa'	No'	No'	MS'	Unspecified'	√'	√'	√'	√'	√'	√'	√'	√'
MSpaaaap'	No'	No'	MS'	Pharynx'	√'	√'	√'	√'	√'	√'	√'	√'
MSpaaapa'	No'	No'	MS'	Pharynx'	√'	√'	√'	√'	√'	√'	√'	√'
MSpaaapp'	No'	No'	MS'	Pharynx'	√'	√'	√'	√'	√'	√'	√'	√'
MSpaapaa'	No'	No'	MS'	Unspecified'	√'	√'	√'	√'	√'	√'	√'	√'
MSpaapap'	No'	No'	MS'	Unspecified'	√'	√'	√'	√'	√'	√'	√'	√'
MSpapaaa'	No'	No'	MS'	Pharynx'	√'	√'	√'	√'	√'	√'	√'	√'
MSpapaap'	No'	No'	MS'	Unspecified'	√'	√'	√'	√'	√'	√'	√'	√'
MSpapapa'	No'	No'	MS'	Unspecified'	√'	√'	√'	√'	√'	√'	√'	√'
MSpapapp'	No'	No'	MS'	Unspecified'	√'	√'	√'	√'	√'	√'	√'	√'
MSpapppa'	No'	No'	MS'	Muscle'	√'	√'	√'	√'	√'	√'	√'	√'
MSpapppp'	No'	No'	MS'	Muscle'	√'	√'	√'	√'	√'	√'	√'	√'
MSppaaaa'	No'	No'	MS'	Other'	√'	√'	√'	√'	√'	√'	√'	√'
MSppapaa'	No'	No'	MS'	Other'	√'	√'	√'	√'	√'	√'	√'	√'
MSpapaapa'	No'	No'	MS'	Unspecified'	√'	√'	√'	√'	√'	√'	√'	√'
E'	No'	No'	E'	Intestine'	√'	√'	√'	√'	√'	√'	√'	√'
Ea'	No'	No'	E'	Intestine'	√'	√'	√'	√'	√'	√'	√'	√'
Eal'	No'	No'	E'	Intestine'	√'	√'	√'	√'	√'	√'	√'	√'
Eala'	No'	No'	E'	Intestine'	√'	√'	√'	√'	√'	√'	√'	√'
Ealaa'	No'	No'	E'	Intestine'	√'	√'	√'	√'	√'	√'	√'	√'
Ep'	No'	No'	E'	Intestine'	√'	√'	√'	√'	√'	√'	√'	√'
Ear'	No'	No'	E'	Intestine'	√'	√'	√'	√'	√'	√'	√'	√'
Ealp'	No'	No'	E'	Intestine'	√'	√'	√'	√'	√'	√'	√'	√'
Epl'	No'	No'	E'	Intestine'	√'	√'	√'	√'	√'	√'	√'	√'
Eara'	No'	No'	E'	Intestine'	√'	√'	√'	√'	√'	√'	√'	√'
Epr'	No'	No'	E'	Intestine'	√'	√'	√'	√'	√'	√'	√'	√'
Earp'	No'	No'	E'	Intestine'	√'	√'	√'	√'	√'	√'	√'	√'
Epla'	No'	No'	E'	Intestine'	√'	√'	√'	√'	√'	√'	√'	√'
Earaa'	No'	No'	E'	Intestine'	√'	√'	√'	√'	√'	√'	√'	√'
Eplp'	No'	No'	E'	Intestine'	√'	√'	√'	√'	√'	√'	√'	√'
Epra'	No'	No'	E'	Intestine'	√'	√'	√'	√'	√'	√'	√'	√'
Eprp'	No'	No'	E'	Intestine'	√'	√'	√'	√'	√'	√'	√'	√'
Eplpp'	No'	No'	E'	Intestine'	√'	√'	√'	√'	√'	√'	√'	√'
Eprpp'	No'	No'	E'	Intestine'	√'	√'	√'	√'	√'	√'	√'	√'
C'	No'	No'	C'	Unspecified'	√'	√'	√'	√'	√'	√'	√'	√'
Ca'	No'	No'	C'	Unspecified'	√'	√'	√'	√'	√'	√'	√'	√'
Caa'	No'	No'	C'	Unspecified'	√'	√'	√'	√'	√'	√'	√'	√'
Caaa'	No'	No'	C'	Skin'	√'	√'	√'	√'	√'	√'	√'	√'
Caaaa'	No'	No'	C'	Skin'	√'	√'	√'	√'	√'	√'	√'	√'
Cp'	No'	No'	C'	Unspecified'	√'	√'	√'	√'	√'	√'	√'	√'
Cap'	No'	No'	C'	Muscle'	√'	√'	√'	√'	√'	√'	√'	√'
Caap'	No'	No'	C'	Unspecified'	√'	√'	√'	√'	√'	√'	√'	√'
Caaap'	No'	No'	C'	Skin'	√'	√'	√'	√'	√'	√'	√'	√'
Cpa'	No'	No'	C'	Skin'	√'	√'	√'	√'	√'	√'	√'	√'
Capa'	No'	No'	C'	Muscle'	√'	√'	√'	√'	√'	√'	√'	√'
Caapa'	No'	No'	C'	Unspecified'	√'	√'	√'	√'	√'	√'	√'	√'
Cpp'	No'	No'	C'	Muscle'	√'	√'	√'	√'	√'	√'	√'	√'
Capp'	No'	No'	C'	Muscle'	√'	√'	√'	√'	√'	√'	√'	√'
Caapp'	No'	No'	C'	Unspecified'	√'	√'	√'	√'	√'	√'	√'	√'
Cpaa'	No'	No'	C'	Skin'	√'	√'	√'	√'	√'	√'	√'	√'
Capaa'	No'	No'	C'	Muscle'	√'	√'	√'	√'	√'	√'	√'	√'
Cpap'	No'	No'	C'	Skin'	√'	√'	√'	√'	√'	√'	√'	√'
Capap'	No'	No'	C'	Muscle'	√'	√'	√'	√'	√'	√'	√'	√'
Cppa'	No'	No'	C'	Muscle'	√'	√'	√'	√'	√'	√'	√'	√'
Cappa'	No'	No'	C'	Muscle'	√'	√'	√'	√'	√'	√'	√'	√'
Cppp'	No'	No'	C'	Muscle'	√'	√'	√'	√'	√'	√'	√'	√'
Cappp'	No'	No'	C'	Muscle'	√'	√'	√'	√'	√'	√'	√'	√'
Cpaaa'	No'	No'	C'	Skin'	√'	√'	√'	√'	√'	√'	√'	√'
Capaaa'	No'	No'	C'	Muscle'	√'	√'	√'	√'	√'	√'	√'	√'
Cpaap'	No'	No'	C'	Skin'	√'	√'	√'	√'	√'	√'	√'	√'
Capaap'	No'	No'	C'	Muscle'	√'	√'	√'	√'	√'	√'	√'	√'
Cpapa'	No'	No'	C'	Skin'	√'	√'	√'	√'	√'	√'	√'	√'
Capapa'	No'	No'	C'	Muscle'	√'	√'	√'	√'	√'	√'	√'	√'
Cpapp'	No'	No'	C'	Skin'	√'	√'	√'	√'	√'	√'	√'	√'
Capapp'	No'	No'	C'	Muscle'	√'	√'	√'	√'	√'	√'	√'	√'
Cppaa'	No'	No'	C'	Muscle'	√'	√'	√'	√'	√'	√'	√'	√'
Cappaa'	No'	No'	C'	Muscle'	√'	√'	√'	√'	√'	√'	√'	√'
Cppap'	No'	No'	C'	Muscle'	√'	√'	√'	√'	√'	√'	√'	√'
Cappap'	No'	No'	C'	Muscle'	√'	√'	√'	√'	√'	√'	√'	√'
Cpppa'	No'	No'	C'	Muscle'	√'	√'	√'	√'	√'	√'	√'	√'
Capppa'	No'	No'	C'	Muscle'	√'	√'	√'	√'	√'	√'	√'	√'
Cpppp'	No'	No'	C'	Muscle'	√'	√'	√'	√'	√'	√'	√'	√'
Capppp'	No'	No'	C'	Muscle'	√'	√'	√'	√'	√'	√'	√'	√'
Cppaaa'	No'	No'	C'	Muscle'	√'	√'	√'	√'	√'	√'	√'	√'
Cppaap'	No'	No'	C'	Muscle'	√'	√'	√'	√'	√'	√'	√'	√'
Cppapa'	No'	No'	C'	Muscle'	√'	√'	√'	√'	√'	√'	√'	√'
Cppapp'	No'	No'	C'	Muscle'	√'	√'	√'	√'	√'	√'	√'	√'
Cpppaa'	No'	No'	C'	Muscle'	√'	√'	√'	√'	√'	√'	√'	√'
Cpppap'	No'	No'	C'	Muscle'	√'	√'	√'	√'	√'	√'	√'	√'
Cppppa'	No'	No'	C'	Muscle'	√'	√'	√'	√'	√'	√'	√'	√'
Cppppp'	No'	No'	C'	Muscle'	√'	√'	√'	√'	√'	√'	√'	√'
D'	No'	No'	D'	Muscle'	√'	√'	√'	√'	√'	√'	√'	√'
Da'	No'	No'	D'	Muscle'	√'	√'	√'	√'	√'	√'	√'	√'
Daa'	No'	No'	D'	Muscle'	√'	√'	√'	√'	√'	√'	√'	√'
Daaa'	No'	No'	D'	Muscle'	√'	√'	√'	√'	√'	√'	√'	√'
Dp'	No'	No'	D'	Muscle'	√'	√'	√'	√'	√'	√'	√'	√'
Dap'	No'	No'	D'	Muscle'	√'	√'	√'	√'	√'	√'	√'	√'
Daap'	No'	No'	D'	Muscle'	√'	√'	√'	√'	√'	√'	√'	√'
Dpa'	No'	No'	D'	Muscle'	√'	√'	√'	√'	√'	√'	√'	√'
Dapa'	No'	No'	D'	Muscle'	√'	√'	√'	√'	√'	√'	√'	√'
Dpp'	No'	No'	D'	Muscle'	√'	√'	√'	√'	√'	√'	√'	√'
Dapp'	No'	No'	D'	Muscle'	√'	√'	√'	√'	√'	√'	√'	√'
Dpaa'	No'	No'	D'	Muscle'	√'	√'	√'	√'	√'	√'	√'	√'
Dpap'	No'	No'	D'	Muscle'	√'	√'	√'	√'	√'	√'	√'	√'
Dppa'	No'	No'	D'	Muscle'	√'	√'	√'	√'	√'	√'	√'	√'
Dappa'	No'	No'	D'	Muscle'	√'	√'	√'	√'	√'	√'	√'	√'
Dppp'	No'	No'	D'	Muscle'	√'	√'	√'	√'	√'	√'	√'	√'
Dappp'	No'	No'	D'	Muscle'	√'	√'	√'	√'	√'	√'	√'	√'
Dpppa'	No'	No'	D'	Muscle'	√'	√'	√'	√'	√'	√'	√'	√'
Dpppp'	No'	No'	D'	Muscle'	√'	√'	√'	√'	√'	√'	√'	√'
P3'	No'	No'	/'	Unspecified'	√'	√'	√'	√'	√'	√'	√'	√'
P4'	No'	No'	/'	Germ Cell'	√'	√'	√'	√'	√'	√'	√'	√'
EMS'	No'	No'	/'	Unspecified'	√'	√'	√'	√'	√'	√'	√'	√'
P2'	No'	No'	/'	Unspecified'	√'	√'	√'	√'	√'	√'	√'	√'
P1'	No'	No'	/'	Unspecified'	√'	×'	×'	√'	×'	√'	×'	×'
AB'	No'	No'	AB'	Unspecified'	√'	×'	×'	√'	×'	√'	×'	×'
P0'	No'	No'	/'	Unspecified'	×'	×'	×'	×'	×'	×'	×'	×'
Note 1: The complete list for cell identity is obtained from J.E. Sulston, J.G. White, “Parts list” in “The Nematode Caenorhabditis elegans” edited by W.B. Wood. Cold Spring Harbor Laboratory Press, 415-431 (1988). url: https://www.wormatlas.org/celllistsulston.htm, deposited in Z.F. Altun et al., “Cell Lists” in WormAtlas (2002-2023). url: http://www.wormatlas.org.
Note 2: The cell lineages derived from the 5 somatic founder cells (i.e., AB, MS, E, C, and D) are marked with their names, while the germline stem cells (i.e., P0, P1, P2, P3, P4, and Z2/Z3) and the mother cell of MS and E (i.e., EMS) are marked with "/".
Note 3: The cell fate is obtained from X. Ma et al., A 4D single-cell protein atlas of transcription factors delineates spatiotemporal patterning during embryogenesis. Nat. Methods 18, 893-902 (2021). doi: 10.1038/s41592-021-01216-1; pmid: 34312566. The apoptotic fate has been manually checked for all cells one by one according to J.E. Sulston, E. Schierenberg, J.G. White, J.N. Thomson, The embry…
Note 4: "√" means the cell is imaged for at least one time point with it cell nucleus traced successfully, while "×" means it's not recorded at all in this embryo sample.

## Sheet: Fully reproducible cell
Cell identity	With complete lifespan or not	With complete lifespan before ~350-cell stage (√) or not (×)	With complete lifespan after ~350-cell stage (√) or not (×)	Apoptotic cell or not	Cell lineage	Cell fate
ABa'	No'	×'	×'	No'	AB'	Unspecified'
ABal'	Yes'	√'	×'	No'	AB'	Unspecified'
ABala'	Yes'	√'	×'	No'	AB'	Unspecified'
ABalaa'	Yes'	√'	×'	No'	AB'	Unspecified'
ABalaaa'	Yes'	√'	×'	No'	AB'	Unspecified'
ABalaaaa'	Yes'	√'	×'	No'	AB'	Unspecified'
ABalaaaal'	Yes'	√'	×'	No'	AB'	Unspecified'
ABalaaaala'	Yes'	×'	√'	No'	AB'	Unspecified'
ABalaaaalal'	No'	×'	×'	No'	AB'	Neuron'
ABp'	No'	×'	×'	No'	AB'	Unspecified'
ABar'	Yes'	√'	×'	No'	AB'	Unspecified'
ABalp'	Yes'	√'	×'	No'	AB'	Unspecified'
ABalap'	Yes'	√'	×'	No'	AB'	Unspecified'
ABalaap'	Yes'	√'	×'	No'	AB'	Unspecified'
ABalaaap'	Yes'	√'	×'	No'	AB'	Unspecified'
ABalaaaar'	Yes'	√'	×'	No'	AB'	Unspecified'
ABalaaaalp'	Yes'	×'	√'	No'	AB'	Unspecified'
ABalaaaalar'	No'	×'	×'	Yes'	AB'	Death'
ABpl'	Yes'	√'	×'	No'	AB'	Unspecified'
ABara'	Yes'	√'	×'	No'	AB'	Unspecified'
ABalpa'	Yes'	√'	×'	No'	AB'	Unspecified'
ABalapa'	Yes'	√'	×'	No'	AB'	Unspecified'
ABalaapa'	Yes'	√'	×'	No'	AB'	Unspecified'
ABalaaapa'	Yes'	√'	×'	No'	AB'	Unspecified'
ABalaaaarl'	Yes'	×'	√'	No'	AB'	Unspecified'
ABalaaaalpa'	No'	×'	×'	Yes'	AB'	Death'
ABpr'	Yes'	√'	×'	No'	AB'	Unspecified'
ABarp'	Yes'	√'	×'	No'	AB'	Unspecified'
ABalpp'	Yes'	√'	×'	No'	AB'	Unspecified'
ABalapp'	Yes'	√'	×'	No'	AB'	Unspecified'
ABalaapp'	Yes'	√'	×'	No'	AB'	Unspecified'
ABalaaapp'	Yes'	√'	×'	No'	AB'	Unspecified'
ABalaaaarr'	Yes'	×'	√'	No'	AB'	Unspecified'
ABalaaaalpp'	No'	×'	×'	No'	AB'	Neuron'
ABpla'	Yes'	√'	×'	No'	AB'	Unspecified'
ABaraa'	Yes'	√'	×'	No'	AB'	Unspecified'
ABalpaa'	Yes'	√'	×'	No'	AB'	Unspecified'
ABalapaa'	Yes'	√'	×'	No'	AB'	Unspecified'
ABalaapaa'	Yes'	√'	×'	No'	AB'	Unspecified'
ABalaaapal'	Yes'	×'	√'	No'	AB'	Neuron'
ABalaaaarla'	No'	×'	×'	Yes'	AB'	Death'
ABplp'	Yes'	√'	×'	No'	AB'	Unspecified'
ABarap'	Yes'	√'	×'	No'	AB'	Unspecified'
ABalpap'	Yes'	√'	×'	No'	AB'	Unspecified'
ABalapap'	Yes'	√'	×'	No'	AB'	Unspecified'
ABalaapap'	Yes'	√'	×'	No'	AB'	Unspecified'
ABalaaapar'	Yes'	×'	√'	No'	AB'	Unspecified'
ABalaaaarlp'	No'	×'	×'	No'	AB'	Neuron'
ABpra'	Yes'	√'	×'	No'	AB'	Unspecified'
ABarpa'	Yes'	√'	×'	No'	AB'	Unspecified'
ABalppa'	Yes'	√'	×'	No'	AB'	Unspecified'
ABalappa'	Yes'	√'	×'	No'	AB'	Unspecified'
ABalaappa'	Yes'	√'	×'	No'	AB'	Unspecified'
ABalaaappl'	Yes'	×'	√'	No'	AB'	Unspecified'
ABalaaaarra'	No'	×'	×'	Yes'	AB'	Death'
ABprp'	Yes'	√'	×'	No'	AB'	Unspecified'
ABarpp'	Yes'	√'	×'	No'	AB'	Unspecified'
ABalppp'	Yes'	√'	×'	No'	AB'	Unspecified'
ABalappp'	Yes'	√'	×'	No'	AB'	Unspecified'
ABalaappp'	Yes'	√'	×'	No'	AB'	Unspecified'
ABalaaappr'	Yes'	×'	√'	No'	AB'	Neuron'
ABalaaaarrp'	No'	×'	×'	No'	AB'	Neuron'
ABplaa'	Yes'	√'	×'	No'	AB'	Unspecified'
ABaraaa'	Yes'	√'	×'	No'	AB'	Unspecified'
ABalpaaa'	Yes'	√'	×'	No'	AB'	Unspecified'
ABalapaaa'	Yes'	√'	×'	No'	AB'	Unspecified'
ABalaapaaa'	Yes'	×'	√'	No'	AB'	Unspecified'
ABalaaapall'	No'	×'	×'	No'	AB'	Neuron'
ABplap'	Yes'	√'	×'	No'	AB'	Unspecified'
ABaraap'	Yes'	√'	×'	No'	AB'	Unspecified'
ABalpaap'	Yes'	√'	×'	No'	AB'	Unspecified'
ABalapaap'	Yes'	√'	×'	No'	AB'	Unspecified'
ABalaapaap'	Yes'	×'	√'	No'	AB'	Unspecified'
ABalaaapalr'	No'	×'	×'	No'	AB'	Neuron'
ABplpa'	Yes'	√'	×'	No'	AB'	Unspecified'
ABarapa'	Yes'	√'	×'	No'	AB'	Unspecified'
ABalpapa'	Yes'	√'	×'	No'	AB'	Unspecified'
ABalapapa'	Yes'	√'	×'	No'	AB'	Unspecified'
ABalaapapa'	No'	×'	×'	Yes'	AB'	Death'
ABalaaaparl'	No'	×'	×'	Yes'	AB'	Death'
ABplpp'	Yes'	√'	×'	No'	AB'	Unspecified'
ABarapp'	Yes'	√'	×'	No'	AB'	Unspecified'
ABalpapp'	Yes'	√'	×'	No'	AB'	Unspecified'
ABalapapp'	Yes'	√'	×'	No'	AB'	Unspecified'
ABalaapapp'	Yes'	×'	√'	No'	AB'	Unspecified'
ABalaaaparr'	No'	×'	×'	No'	AB'	Neuron'
ABpraa'	Yes'	√'	×'	No'	AB'	Unspecified'
ABarpaa'	Yes'	√'	×'	No'	AB'	Unspecified'
ABalppaa'	Yes'	√'	×'	No'	AB'	Unspecified'
ABalappaa'	Yes'	√'	×'	No'	AB'	Unspecified'
ABalaappaa'	No'	×'	×'	Yes'	AB'	Death'
ABalaaappll'	No'	×'	×'	No'	AB'	Neuron'
ABprap'	Yes'	√'	×'	No'	AB'	Unspecified'
ABarpap'	Yes'	√'	×'	No'	AB'	Unspecified'
ABalppap'	Yes'	√'	×'	No'	AB'	Unspecified'
ABalappap'	Yes'	√'	×'	No'	AB'	Unspecified'
ABalaappap'	Yes'	×'	√'	No'	AB'	Neuron'
ABalaaapplr'	No'	×'	×'	Yes'	AB'	Death'
ABprpa'	Yes'	√'	×'	No'	AB'	Unspecified'
ABarppa'	Yes'	√'	×'	No'	AB'	Unspecified'
ABalpppa'	Yes'	√'	×'	No'	AB'	Unspecified'
ABalapppa'	Yes'	√'	×'	No'	AB'	Unspecified'
ABalaapppa'	Yes'	×'	√'	No'	AB'	Unspecified'
ABalaaapprl'	No'	×'	×'	No'	AB'	Neuron'
ABprpp'	Yes'	√'	×'	No'	AB'	Unspecified'
ABarppp'	Yes'	√'	×'	No'	AB'	Unspecified'
ABalpppp'	Yes'	√'	×'	No'	AB'	Unspecified'
ABalapppp'	Yes'	√'	×'	No'	AB'	Unspecified'
ABalaapppp'	Yes'	×'	√'	No'	AB'	Unspecified'
ABalaaapprr'	No'	×'	×'	No'	AB'	Neuron'
ABplaaa'	Yes'	√'	×'	No'	AB'	Unspecified'
ABaraaaa'	Yes'	√'	×'	No'	AB'	Unspecified'
ABalpaaaa'	Yes'	√'	×'	No'	AB'	Unspecified'
ABalapaaaa'	Yes'	×'	√'	No'	AB'	Unspecified'
ABalaapaaal'	No'	×'	×'	Yes'	AB'	Death'
ABplaap'	Yes'	√'	×'	No'	AB'	Unspecified'
ABaraaap'	Yes'	√'	×'	No'	AB'	Unspecified'
ABalpaaap'	Yes'	√'	×'	No'	AB'	Unspecified'
ABalapaaap'	Yes'	×'	√'	No'	AB'	Neuron'
ABalaapaaar'	No'	×'	×'	No'	AB'	Neuron'
ABplapa'	Yes'	√'	×'	No'	AB'	Unspecified'
ABaraapa'	Yes'	√'	×'	No'	AB'	Unspecified'
ABalpaapa'	Yes'	√'	×'	No'	AB'	Unspecified'
ABalapaapa'	Yes'	×'	√'	No'	AB'	Unspecified'
ABalaapaapa'	No'	×'	×'	Yes'	AB'	Death'
ABplapp'	Yes'	√'	×'	No'	AB'	Unspecified'
ABaraapp'	Yes'	√'	×'	No'	AB'	Unspecified'
ABalpaapp'	Yes'	√'	×'	No'	AB'	Skin'
ABalapaapp'	Yes'	×'	√'	No'	AB'	Unspecified'
ABalaapaapp'	No'	×'	×'	No'	AB'	Neuron'
ABplpaa'	Yes'	√'	×'	No'	AB'	Unspecified'
ABarapaa'	Yes'	√'	×'	No'	AB'	Unspecified'
ABalpapaa'	Yes'	√'	×'	No'	AB'	Unspecified'
ABalapapaa'	No'	×'	×'	Yes'	AB'	Death'
ABplpap'	Yes'	√'	×'	No'	AB'	Unspecified'
ABarapap'	Yes'	√'	×'	No'	AB'	Unspecified'
ABalpapap'	Yes'	√'	×'	No'	AB'	Unspecified'
ABalapapap'	Yes'	×'	√'	No'	AB'	Unspecified'
ABplppa'	Yes'	√'	×'	No'	AB'	Unspecified'
ABarappa'	Yes'	√'	×'	No'	AB'	Unspecified'
ABalpappa'	Yes'	√'	×'	No'	AB'	Unspecified'
ABalapappa'	Yes'	×'	√'	No'	AB'	Unspecified'
ABalaapappa'	No'	×'	×'	Yes'	AB'	Death'
ABplppp'	Yes'	√'	×'	No'	AB'	Unspecified'
ABarappp'	Yes'	√'	×'	No'	AB'	Unspecified'
ABalpappp'	Yes'	√'	×'	No'	AB'	Unspecified'
ABalapappp'	Yes'	×'	√'	No'	AB'	Neuron'
ABalaapappp'	No'	×'	×'	No'	AB'	Neuron'
ABpraaa'	Yes'	√'	×'	No'	AB'	Unspecified'
ABarpaaa'	Yes'	√'	×'	No'	AB'	Unspecified'
ABalppaaa'	Yes'	√'	×'	No'	AB'	Unspecified'
ABalappaaa'	No'	×'	×'	Yes'	AB'	Death'
ABpraap'	Yes'	√'	×'	No'	AB'	Unspecified'
ABarpaap'	Yes'	√'	×'	No'	AB'	Skin'
ABalppaap'	Yes'	√'	×'	No'	AB'	Unspecified'
ABalappaap'	Yes'	×'	√'	No'	AB'	Unspecified'
ABprapa'	Yes'	√'	×'	No'	AB'	Unspecified'
ABarpapa'	Yes'	√'	×'	No'	AB'	Unspecified'
ABalppapa'	Yes'	√'	×'	No'	AB'	Neuron'
ABalappapa'	Yes'	×'	√'	No'	AB'	Unspecified'
ABalaappapa'	No'	×'	×'	No'	AB'	Neuron'
ABprapp'	Yes'	√'	×'	No'	AB'	Unspecified'
ABarpapp'	Yes'	√'	×'	No'	AB'	Skin'
ABalppapp'	Yes'	√'	×'	No'	AB'	Unspecified'
ABalappapp'	Yes'	×'	√'	No'	AB'	Neuron'
ABalaappapp'	No'	×'	×'	No'	AB'	Neuron'
ABprpaa'	Yes'	√'	×'	No'	AB'	Unspecified'
ABarppaa'	Yes'	√'	×'	No'	AB'	Unspecified'
ABalpppaa'	Yes'	√'	×'	No'	AB'	Unspecified'
ABalapppaa'	Yes'	×'	√'	No'	AB'	Neuron'
ABalaapppaa'	No'	×'	×'	No'	AB'	Neuron'
ABprpap'	Yes'	√'	×'	No'	AB'	Unspecified'
ABarppap'	Yes'	√'	×'	No'	AB'	Skin'
ABalpppap'	Yes'	√'	×'	No'	AB'	Unspecified'
ABalapppap'	Yes'	×'	√'	No'	AB'	Unspecified'
ABalaapppap'	No'	×'	×'	Yes'	AB'	Death'
ABprppa'	Yes'	√'	×'	No'	AB'	Unspecified'
ABarpppa'	Yes'	√'	×'	No'	AB'	Unspecified'
ABalppppa'	Yes'	√'	×'	No'	AB'	Unspecified'
ABalappppa'	Yes'	×'	√'	No'	AB'	Unspecified'
ABalaappppa'	No'	×'	×'	No'	AB'	Unspecified'
ABprppp'	Yes'	√'	×'	No'	AB'	Unspecified'
ABarpppp'	Yes'	√'	×'	No'	AB'	Skin'
ABalppppp'	Yes'	√'	×'	No'	AB'	Unspecified'
ABalappppp'	Yes'	×'	√'	No'	AB'	Neuron'
ABalaappppp'	No'	×'	×'	No'	AB'	Neuron'
ABplaaaa'	Yes'	√'	×'	No'	AB'	Unspecified'
ABaraaaaa'	Yes'	√'	×'	No'	AB'	Pharynx'
ABalpaaaaa'	Yes'	×'	√'	No'	AB'	Pharynx'
ABalapaaaaa'	No'	×'	×'	No'	AB'	Neuron'
ABplaaap'	Yes'	√'	×'	No'	AB'	Skin'
ABaraaaap'	Yes'	√'	×'	No'	AB'	Unspecified'
ABalpaaaap'	Yes'	×'	√'	No'	AB'	Unspecified'
ABalapaaaap'	No'	×'	×'	Yes'	AB'	Death'
ABplaapa'	Yes'	√'	×'	No'	AB'	Unspecified'
ABaraaapa'	Yes'	√'	×'	No'	AB'	Unspecified'
ABalpaaapa'	Yes'	×'	√'	No'	AB'	Unspecified'
ABalapaaapa'	No'	×'	×'	No'	AB'	Neuron'
ABplaapp'	Yes'	√'	×'	No'	AB'	Skin'
ABaraaapp'	Yes'	√'	×'	No'	AB'	Skin'
ABalpaaapp'	Yes'	×'	√'	No'	AB'	Unspecified'
ABalapaaapp'	No'	×'	×'	No'	AB'	Neuron'
ABplapaa'	Yes'	√'	×'	No'	AB'	Unspecified'
ABaraapaa'	Yes'	√'	×'	No'	AB'	Pharynx'
ABalpaapaa'	Yes'	×'	√'	No'	AB'	Unspecified'
ABalapaapaa'	No'	×'	×'	No'	AB'	Neuron'
ABplapap'	Yes'	√'	×'	No'	AB'	Unspecified'
ABaraapap'	Yes'	√'	×'	No'	AB'	Unspecified'
ABalpaapap'	Yes'	×'	√'	No'	AB'	Pharynx'
ABalapaapap'	No'	×'	×'	Yes'	AB'	Death'
ABplappa'	Yes'	√'	×'	No'	AB'	Skin'
ABaraappa'	Yes'	√'	×'	No'	AB'	Pharynx'
ABalpaappa'	Yes'	×'	√'	No'	AB'	Skin'
ABalapaappa'	No'	×'	×'	No'	AB'	Unspecified'
ABplappp'	Yes'	√'	×'	No'	AB'	Unspecified'
ABaraappp'	Yes'	√'	×'	No'	AB'	Unspecified'
ABalpaappp'	Yes'	×'	√'	No'	AB'	Skin'
ABalapaappp'	No'	×'	×'	No'	AB'	Neuron'
ABplpaaa'	Yes'	√'	×'	No'	AB'	Unspecified'
ABarapaaa'	Yes'	√'	×'	No'	AB'	Unspecified'
ABalpapaaa'	Yes'	×'	√'	No'	AB'	Unspecified'
ABplpaap'	Yes'	√'	×'	No'	AB'	Unspecified'
ABarapaap'	Yes'	√'	×'	No'	AB'	Unspecified'
ABalpapaap'	Yes'	×'	√'	No'	AB'	Unspecified'
ABplpapa'	Yes'	√'	×'	No'	AB'	Unspecified'
ABarapapa'	Yes'	√'	×'	No'	AB'	Unspecified'
ABalpapapa'	Yes'	×'	√'	No'	AB'	Unspecified'
ABalapapapa'	No'	×'	×'	No'	AB'	Unspecified'
ABplpapp'	Yes'	√'	×'	No'	AB'	Unspecified'
ABarapapp'	Yes'	√'	×'	No'	AB'	Unspecified'
ABalpapapp'	Yes'	×'	√'	No'	AB'	Unspecified'
ABalapapapp'	No'	×'	×'	No'	AB'	Neuron'
ABplppaa'	Yes'	√'	×'	No'	AB'	Unspecified'
ABarappaa'	Yes'	√'	×'	No'	AB'	Unspecified'
ABalpappaa'	Yes'	×'	√'	No'	AB'	Unspecified'
ABalapappaa'	No'	×'	×'	No'	AB'	Unspecified'
ABplppap'	Yes'	√'	×'	No'	AB'	Neuron'
ABarappap'	Yes'	√'	×'	No'	AB'	Unspecified'
ABalpappap'	Yes'	×'	√'	No'	AB'	Pharynx'
ABalapappap'	No'	×'	×'	No'	AB'	Neuron'
ABplpppa'	Yes'	√'	×'	No'	AB'	Unspecified'
ABarapppa'	Yes'	√'	×'	No'	AB'	Neuron'
ABalpapppa'	Yes'	×'	√'	No'	AB'	Unspecified'
ABalapapppa'	No'	×'	×'	No'	AB'	Neuron'
ABplpppp'	Yes'	√'	×'	No'	AB'	Unspecified'
ABarapppp'	Yes'	√'	×'	No'	AB'	Unspecified'
ABalpapppp'	Yes'	×'	√'	No'	AB'	Pharynx'
ABalapapppp'	No'	×'	×'	No'	AB'	Neuron'
ABpraaaa'	Yes'	√'	×'	No'	AB'	Unspecified'
ABarpaaaa'	Yes'	√'	×'	No'	AB'	Neuron'
ABalppaaaa'	No'	×'	×'	Yes'	AB'	Death'
ABpraaap'	Yes'	√'	×'	No'	AB'	Unspecified'
ABarpaaap'	Yes'	√'	×'	No'	AB'	Unspecified'
ABalppaaap'	Yes'	×'	√'	No'	AB'	Neuron'
ABpraapa'	Yes'	√'	×'	No'	AB'	Unspecified'
ABarpaapa'	Yes'	√'	×'	No'	AB'	Skin'
ABalppaapa'	No'	×'	×'	Yes'	AB'	Death'
ABalappaapa'	No'	×'	×'	No'	AB'	Neuron'
ABpraapp'	Yes'	√'	×'	No'	AB'	Skin'
ABarpaapp'	Yes'	√'	×'	No'	AB'	Skin'
ABalppaapp'	Yes'	×'	√'	No'	AB'	Unspecified'
ABalappaapp'	No'	×'	×'	Yes'	AB'	Death'
ABprapaa'	Yes'	√'	×'	No'	AB'	Unspecified'
ABarpapaa'	Yes'	√'	×'	No'	AB'	Unspecified'
ABalppapaa'	Yes'	×'	√'	No'	AB'	Neuron'
ABalappapaa'	No'	×'	×'	No'	AB'	Neuron'
ABprapap'	Yes'	√'	×'	No'	AB'	Unspecified'
ABarpapap'	Yes'	√'	×'	No'	AB'	Skin'
ABalppapap'	Yes'	×'	√'	No'	AB'	Neuron'
ABalappapap'	No'	×'	×'	Yes'	AB'	Death'
ABprappa'	Yes'	√'	×'	No'	AB'	Skin'
ABarpappa'	Yes'	√'	×'	No'	AB'	Skin'
ABalppappa'	Yes'	×'	√'	No'	AB'	Neuron'
ABalappappa'	No'	×'	×'	No'	AB'	Neuron'
ABprappp'	Yes'	√'	×'	No'	AB'	Unspecified'
ABarpappp'	Yes'	√'	×'	No'	AB'	Skin'
ABalppappp'	Yes'	×'	√'	No'	AB'	Unspecified'
ABalappappp'	No'	×'	×'	No'	AB'	Neuron'
ABprpaaa'	Yes'	√'	×'	No'	AB'	Unspecified'
ABarppaaa'	Yes'	√'	×'	No'	AB'	Unspecified'
ABalpppaaa'	Yes'	×'	√'	No'	AB'	Neuron'
ABalapppaaa'	No'	×'	×'	No'	AB'	Neuron'
ABprpaap'	Yes'	√'	×'	No'	AB'	Unspecified'
ABarppaap'	Yes'	√'	×'	No'	AB'	Unspecified'
ABalpppaap'	Yes'	×'	√'	No'	AB'	Unspecified'
ABalapppaap'	No'	×'	×'	No'	AB'	Neuron'
ABprpapa'	Yes'	√'	×'	No'	AB'	Unspecified'
ABarppapa'	Yes'	√'	×'	No'	AB'	Skin'
ABalpppapa'	Yes'	×'	√'	No'	AB'	Neuron'
ABalapppapa'	No'	×'	×'	No'	AB'	Unspecified'
ABprpapp'	Yes'	√'	×'	No'	AB'	Unspecified'
ABarppapp'	Yes'	√'	×'	No'	AB'	Skin'
ABalpppapp'	Yes'	×'	√'	No'	AB'	Unspecified'
ABalapppapp'	No'	×'	×'	No'	AB'	Neuron'
ABprppaa'	Yes'	√'	×'	No'	AB'	Unspecified'
ABarpppaa'	Yes'	√'	×'	No'	AB'	Unspecified'
ABalppppaa'	Yes'	×'	√'	No'	AB'	Unspecified'
ABalappppaa'	No'	×'	×'	No'	AB'	Unspecified'
ABprppap'	Yes'	√'	×'	No'	AB'	Neuron'
ABarpppap'	Yes'	√'	×'	No'	AB'	Unspecified'
ABalppppap'	Yes'	×'	√'	No'	AB'	Unspecified'
ABalappppap'	No'	×'	×'	No'	AB'	Neuron'
ABprpppa'	Yes'	√'	×'	No'	AB'	Unspecified'
ABarppppa'	Yes'	√'	×'	No'	AB'	Skin'
ABalpppppa'	Yes'	×'	√'	No'	AB'	Neuron'
ABalapppppa'	No'	×'	×'	No'	AB'	Neuron'
ABprpppp'	Yes'	√'	×'	No'	AB'	Unspecified'
ABarppppp'	Yes'	√'	×'	No'	AB'	Skin'
ABalpppppp'	Yes'	×'	√'	No'	AB'	Unspecified'
ABalapppppp'	No'	×'	×'	No'	AB'	Neuron'
ABplaaaaa'	Yes'	√'	×'	No'	AB'	Unspecified'
ABaraaaaaa'	Yes'	×'	√'	No'	AB'	Pharynx'
ABalpaaaaaa'	No'	×'	×'	No'	AB'	Pharynx'
ABplaaaap'	Yes'	√'	×'	No'	AB'	Skin'
ABaraaaaap'	Yes'	×'	√'	No'	AB'	Pharynx'
ABalpaaaaap'	No'	×'	×'	No'	AB'	Pharynx'
ABplaaapa'	Yes'	√'	×'	No'	AB'	Skin'
ABaraaaapa'	Yes'	×'	√'	No'	AB'	Unspecified'
ABalpaaaapa'	No'	×'	×'	No'	AB'	Pharynx'
ABplaaapp'	Yes'	√'	×'	No'	AB'	Skin'
ABaraaaapp'	No'	×'	×'	Yes'	AB'	Death'
ABalpaaaapp'	No'	×'	×'	Yes'	AB'	Death'
ABplaapaa'	Yes'	√'	×'	No'	AB'	Unspecified'
ABaraaapaa'	Yes'	×'	√'	No'	AB'	Unspecified'
ABalpaaapaa'	No'	×'	×'	No'	AB'	Pharynx'
ABplaapap'	Yes'	√'	×'	No'	AB'	Unspecified'
ABaraaapap'	Yes'	×'	√'	No'	AB'	Pharynx'
ABalpaaapap'	No'	×'	×'	Yes'	AB'	Death'
ABplaappa'	Yes'	√'	×'	No'	AB'	Skin'
ABaraaappa'	Yes'	×'	√'	No'	AB'	Skin'
ABalpaaappa'	No'	×'	×'	Yes'	AB'	Death'
ABplaappp'	Yes'	√'	×'	No'	AB'	Skin'
ABaraaappp'	Yes'	×'	√'	No'	AB'	Skin'
ABalpaaappp'	No'	×'	×'	No'	AB'	Pharynx'
ABplapaaa'	Yes'	√'	×'	No'	AB'	Unspecified'
ABaraapaaa'	Yes'	×'	√'	No'	AB'	Pharynx'
ABalpaapaaa'	No'	×'	×'	No'	AB'	Skin'
ABplapaap'	Yes'	√'	×'	No'	AB'	Unspecified'
ABaraapaap'	Yes'	×'	√'	No'	AB'	Pharynx'
ABalpaapaap'	No'	×'	×'	No'	AB'	Pharynx'
ABplapapa'	Yes'	√'	×'	No'	AB'	Unspecified'
ABaraapapa'	Yes'	×'	√'	No'	AB'	Unspecified'
ABalpaapapa'	No'	×'	×'	No'	AB'	Pharynx'
ABplapapp'	Yes'	√'	×'	No'	AB'	Unspecified'
ABaraapapp'	Yes'	×'	√'	No'	AB'	Pharynx'
ABalpaapapp'	No'	×'	×'	No'	AB'	Pharynx'
ABplappaa'	Yes'	√'	×'	No'	AB'	Skin'
ABaraappaa'	Yes'	×'	√'	No'	AB'	Pharynx'
ABalpaappaa'	No'	×'	×'	No'	AB'	Skin'
ABplappap'	Yes'	√'	×'	No'	AB'	Skin'
ABaraappap'	Yes'	×'	√'	No'	AB'	Pharynx'
ABalpaappap'	No'	×'	×'	No'	AB'	Skin'
ABplapppa'	Yes'	√'	×'	No'	AB'	Unspecified'
ABaraapppa'	Yes'	×'	√'	No'	AB'	Unspecified'
ABalpaapppa'	No'	×'	×'	No'	AB'	Skin'
ABplapppp'	Yes'	√'	×'	No'	AB'	Skin'
ABaraapppp'	Yes'	×'	√'	No'	AB'	Pharynx'
ABalpaapppp'	No'	×'	×'	No'	AB'	Skin'
ABplpaaaa'	Yes'	√'	×'	No'	AB'	Unspecified'
ABarapaaaa'	Yes'	×'	√'	No'	AB'	Pharynx'
ABalpapaaaa'	No'	×'	×'	No'	AB'	Neuron'
ABplpaaap'	Yes'	√'	×'	No'	AB'	Unspecified'
ABarapaaap'	Yes'	×'	√'	No'	AB'	Unspecified'
ABalpapaaap'	No'	×'	×'	No'	AB'	Skin'
ABplpaapa'	Yes'	√'	×'	No'	AB'	Unspecified'
ABarapaapa'	Yes'	×'	√'	No'	AB'	Unspecified'
ABalpapaapa'	No'	×'	×'	No'	AB'	Skin'
ABplpaapp'	Yes'	√'	×'	No'	AB'	Unspecified'
ABarapaapp'	Yes'	×'	√'	No'	AB'	Pharynx'
ABalpapaapp'	No'	×'	×'	Yes'	AB'	Death'
ABplpapaa'	Yes'	√'	×'	No'	AB'	Neuron'
ABarapapaa'	Yes'	×'	√'	No'	AB'	Unspecified'
ABalpapapaa'	No'	×'	×'	No'	AB'	Neuron'
ABplpapap'	Yes'	√'	×'	No'	AB'	Unspecified'
ABarapapap'	Yes'	×'	√'	No'	AB'	Unspecified'
ABalpapapap'	No'	×'	×'	No'	AB'	Unspecified'
ABplpappa'	Yes'	√'	×'	No'	AB'	Unspecified'
ABarapappa'	Yes'	×'	√'	No'	AB'	Unspecified'
ABalpapappa'	No'	×'	×'	Yes'	AB'	Death'
ABplpappp'	Yes'	√'	×'	No'	AB'	Unspecified'
ABarapappp'	Yes'	×'	√'	No'	AB'	Pharynx'
ABalpapappp'	No'	×'	×'	No'	AB'	Neuron'
ABplppaaa'	Yes'	√'	×'	No'	AB'	Unspecified'
ABarappaaa'	Yes'	×'	√'	No'	AB'	Unspecified'
ABalpappaaa'	No'	×'	×'	Yes'	AB'	Death'
ABplppaap'	Yes'	√'	×'	No'	AB'	Unspecified'
ABarappaap'	Yes'	×'	√'	No'	AB'	Unspecified'
ABalpappaap'	No'	×'	×'	No'	AB'	Unspecified'
ABplppapa'	Yes'	√'	×'	No'	AB'	Neuron'
ABarappapa'	Yes'	×'	√'	No'	AB'	Unspecified'
ABalpappapa'	No'	×'	×'	No'	AB'	Pharynx'
ABplppapp'	Yes'	√'	×'	No'	AB'	Neuron'
ABarappapp'	Yes'	×'	√'	No'	AB'	Neuron'
ABalpappapp'	No'	×'	×'	No'	AB'	Pharynx'
ABplpppaa'	Yes'	√'	×'	No'	AB'	Neuron'
ABarapppaa'	Yes'	×'	√'	No'	AB'	Neuron'
ABalpapppaa'	No'	×'	×'	No'	AB'	Pharynx'
ABplpppap'	Yes'	√'	×'	No'	AB'	Unspecified'
ABarapppap'	Yes'	×'	√'	No'	AB'	Neuron'
ABalpapppap'	No'	×'	×'	Yes'	AB'	Death'
ABplppppa'	Yes'	√'	×'	No'	AB'	Unspecified'
ABarappppa'	Yes'	×'	√'	No'	AB'	Neuron'
ABalpappppa'	No'	×'	×'	No'	AB'	Pharynx'
ABplppppp'	Yes'	√'	×'	No'	AB'	Unspecified'
ABarappppp'	Yes'	×'	√'	No'	AB'	Unspecified'
ABalpappppp'	No'	×'	×'	No'	AB'	Pharynx'
ABpraaaaa'	Yes'	√'	×'	No'	AB'	Unspecified'
ABarpaaaaa'	Yes'	×'	√'	No'	AB'	Neuron'
ABpraaaap'	Yes'	√'	×'	No'	AB'	Unspecified'
ABarpaaaap'	Yes'	×'	√'	No'	AB'	Neuron'
ABpraaapa'	Yes'	√'	×'	No'	AB'	Unspecified'
ABarpaaapa'	Yes'	×'	√'	No'	AB'	Neuron'
ABalppaaapa'	No'	×'	×'	No'	AB'	Neuron'
ABpraaapp'	Yes'	√'	×'	No'	AB'	Unspecified'
ABarpaaapp'	No'	×'	×'	Yes'	AB'	Death'
ABalppaaapp'	No'	×'	×'	No'	AB'	Neuron'
ABpraapaa'	Yes'	√'	×'	No'	AB'	Unspecified'
ABarpaapaa'	No'	×'	×'	No'	AB'	Skin'
ABpraapap'	Yes'	√'	×'	No'	AB'	Unspecified'
ABarpaapap'	No'	×'	×'	No'	AB'	Skin'
ABpraappa'	Yes'	√'	×'	No'	AB'	Skin'
ABarpaappa'	No'	×'	×'	No'	AB'	Skin'
ABalppaappa'	No'	×'	×'	Yes'	AB'	Death'
ABpraappp'	Yes'	√'	×'	No'	AB'	Skin'
ABarpaappp'	No'	×'	×'	No'	AB'	Skin'
ABalppaappp'	No'	×'	×'	No'	AB'	Neuron'
ABprapaaa'	Yes'	√'	×'	No'	AB'	Unspecified'
ABarpapaaa'	Yes'	×'	√'	No'	AB'	Unspecified'
ABalppapaaa'	No'	×'	×'	No'	AB'	Neuron'
ABprapaap'	Yes'	√'	×'	No'	AB'	Unspecified'
ABarpapaap'	Yes'	×'	√'	No'	AB'	Unspecified'
ABalppapaap'	No'	×'	×'	No'	AB'	Neuron'
ABprapapa'	Yes'	√'	×'	No'	AB'	Unspecified'
ABarpapapa'	No'	×'	×'	No'	AB'	Skin'
ABalppapapa'	No'	×'	×'	No'	AB'	Neuron'
ABprapapp'	Yes'	√'	×'	No'	AB'	Unspecified'
ABarpapapp'	No'	×'	×'	No'	AB'	Skin'
ABalppapapp'	No'	×'	×'	No'	AB'	Neuron'
ABprappaa'	Yes'	√'	×'	No'	AB'	Skin'
ABarpappaa'	No'	×'	×'	No'	AB'	Skin'
ABalppappaa'	No'	×'	×'	No'	AB'	Neuron'
ABprappap'	Yes'	√'	×'	No'	AB'	Skin'
ABarpappap'	No'	×'	×'	No'	AB'	Skin'
ABalppappap'	No'	×'	×'	No'	AB'	Neuron'
ABprapppa'	Yes'	√'	×'	No'	AB'	Unspecified'
ABarpapppa'	No'	×'	×'	No'	AB'	Skin'
ABalppapppa'	No'	×'	×'	No'	AB'	Unspecified'
ABprapppp'	Yes'	√'	×'	No'	AB'	Skin'
ABarpapppp'	No'	×'	×'	No'	AB'	Skin'
ABalppapppp'	No'	×'	×'	No'	AB'	Neuron'
ABprpaaaa'	Yes'	√'	×'	No'	AB'	Unspecified'
ABarppaaaa'	No'	×'	×'	No'	AB'	Neuron'
ABalpppaaaa'	No'	×'	×'	No'	AB'	Neuron'
ABprpaaap'	Yes'	√'	×'	No'	AB'	Unspecified'
ABarppaaap'	No'	×'	×'	No'	AB'	Skin'
ABalpppaaap'	No'	×'	×'	No'	AB'	Neuron'
ABprpaapa'	Yes'	√'	×'	No'	AB'	Unspecified'
ABarppaapa'	No'	×'	×'	No'	AB'	Skin'
ABalpppaapd'	No'	×'	×'	No'	AB'	Neuron'
ABprpaapp'	Yes'	√'	×'	No'	AB'	Unspecified'
ABarppaapp'	No'	×'	×'	No'	AB'	Neuron'
ABalpppaapv'	No'	×'	×'	Yes'	AB'	Death'
ABprpapaa'	Yes'	√'	×'	No'	AB'	Neuron'
ABarppapaa'	No'	×'	×'	No'	AB'	Skin'
ABalpppapad'	No'	×'	×'	No'	AB'	Neuron'
ABprpapap'	Yes'	√'	×'	No'	AB'	Unspecified'
ABarppapap'	No'	×'	×'	No'	AB'	Skin'
ABalpppapav'	No'	×'	×'	No'	AB'	Neuron'
ABprpappa'	Yes'	√'	×'	No'	AB'	Neuron'
ABarppappa'	No'	×'	×'	No'	AB'	Skin'
ABalpppappa'	No'	×'	×'	Yes'	AB'	Death'
ABprpappp'	Yes'	√'	×'	No'	AB'	Unspecified'
ABarppappp'	No'	×'	×'	No'	AB'	Skin'
ABalpppappp'	No'	×'	×'	No'	AB'	Unspecified'
ABprppaaa'	Yes'	√'	×'	No'	AB'	Unspecified'
ABarpppaaa'	No'	×'	×'	No'	AB'	Neuron'
ABalppppaad'	No'	×'	×'	No'	AB'	Neuron'
ABprppaap'	Yes'	√'	×'	No'	AB'	Unspecified'
ABarpppaap'	No'	×'	×'	No'	AB'	Skin'
ABalppppaav'	No'	×'	×'	Yes'	AB'	Death'
ABprppapa'	Yes'	√'	×'	No'	AB'	Neuron'
ABarpppapa'	No'	×'	×'	No'	AB'	Skin'
ABalppppapa'	No'	×'	×'	No'	AB'	Unspecified'
ABprppapp'	Yes'	√'	×'	No'	AB'	Neuron'
ABarpppapp'	No'	×'	×'	No'	AB'	Neuron'
ABalppppapp'	No'	×'	×'	Yes'	AB'	Death'
ABprpppaa'	Yes'	√'	×'	No'	AB'	Unspecified'
ABarppppaa'	No'	×'	×'	No'	AB'	Skin'
ABalpppppaa'	No'	×'	×'	No'	AB'	Neuron'
ABprpppap'	Yes'	√'	×'	No'	AB'	Unspecified'
ABarppppap'	No'	×'	×'	No'	AB'	Skin'
ABalpppppap'	No'	×'	×'	No'	AB'	Neuron'
ABprppppa'	Yes'	√'	×'	No'	AB'	Unspecified'
ABarpppppa'	No'	×'	×'	No'	AB'	Skin'
ABalppppppa'	No'	×'	×'	No'	AB'	Unspecified'
ABprppppp'	Yes'	√'	×'	No'	AB'	Unspecified'
ABarpppppp'	No'	×'	×'	No'	AB'	Skin'
ABalppppppp'	No'	×'	×'	No'	AB'	Neuron'
ABplaaaaaa'	Yes'	×'	√'	No'	AB'	Unspecified'
ABaraaaaaaa'	No'	×'	×'	No'	AB'	Pharynx'
ABplaaaaap'	Yes'	×'	√'	No'	AB'	Unspecified'
ABaraaaaaap'	No'	×'	×'	No'	AB'	Pharynx'
ABplaaaapa'	No'	×'	×'	No'	AB'	Skin'
ABaraaaaapa'	No'	×'	×'	No'	AB'	Pharynx'
ABplaaaapp'	No'	×'	×'	No'	AB'	Skin'
ABaraaaaapp'	No'	×'	×'	No'	AB'	Pharynx'
ABplaaapaa'	No'	×'	×'	No'	AB'	Skin'
ABaraaaapaa'	No'	×'	×'	Yes'	AB'	Death'
ABplaaapap'	No'	×'	×'	No'	AB'	Skin'
ABaraaaapap'	No'	×'	×'	No'	AB'	Pharynx'
ABplaaappa'	No'	×'	×'	No'	AB'	Skin'
ABplaaappp'	No'	×'	×'	No'	AB'	Skin'
ABplaapaaa'	Yes'	×'	√'	No'	AB'	Unspecified'
ABaraaapaaa'	No'	×'	×'	No'	AB'	Skin'
ABplaapaap'	Yes'	×'	√'	No'	AB'	Neuron'
ABaraaapaap'	No'	×'	×'	No'	AB'	Pharynx'
ABplaapapa'	Yes'	×'	√'	No'	AB'	Neuron'
ABaraaapapa'	No'	×'	×'	No'	AB'	Pharynx'
ABplaapapp'	Yes'	×'	√'	No'	AB'	Unspecified'
ABaraaapapp'	No'	×'	×'	No'	AB'	Pharynx'
ABplaappaa'	No'	×'	×'	No'	AB'	Skin'
ABaraaappaa'	No'	×'	×'	No'	AB'	Skin'
ABplaappap'	No'	×'	×'	No'	AB'	Skin'
ABaraaappap'	No'	×'	×'	No'	AB'	Skin'
ABplaapppa'	No'	×'	×'	No'	AB'	Skin'
ABaraaapppa'	No'	×'	×'	No'	AB'	Skin'
ABplaapppp'	No'	×'	×'	No'	AB'	Skin'
ABaraaapppp'	No'	×'	×'	No'	AB'	Skin'
ABplapaaaa'	Yes'	×'	√'	No'	AB'	Unspecified'
ABaraapaaaa'	No'	×'	×'	No'	AB'	Pharynx'
ABplapaaap'	Yes'	×'	√'	No'	AB'	Neuron'
ABaraapaaap'	No'	×'	×'	No'	AB'	Pharynx'
ABplapaapa'	No'	×'	×'	No'	AB'	Other'
ABaraapaapa'	No'	×'	×'	No'	AB'	Pharynx'
ABplapaapp'	No'	×'	×'	No'	AB'	Skin'
ABaraapaapp'	No'	×'	×'	No'	AB'	Pharynx'
ABplapapaa'	No'	×'	×'	No'	AB'	Unspecified'
ABaraapapaa'	No'	×'	×'	No'	AB'	Unspecified'
ABplapapap'	No'	×'	×'	No'	AB'	Skin'
ABaraapapap'	No'	×'	×'	No'	AB'	Pharynx'
ABplapappa'	No'	×'	×'	No'	AB'	Skin'
ABaraapappa'	No'	×'	×'	No'	AB'	Pharynx'
ABplapappp'	Yes'	×'	√'	No'	AB'	Unspecified'
ABaraapappp'	No'	×'	×'	No'	AB'	Pharynx'
ABplappaaa'	No'	×'	×'	No'	AB'	Skin'
ABaraappaaa'	No'	×'	×'	No'	AB'	Pharynx'
ABplappaap'	No'	×'	×'	No'	AB'	Skin'
ABaraappaap'	No'	×'	×'	No'	AB'	Pharynx'
ABplappapa'	No'	×'	×'	No'	AB'	Skin'
ABaraappapa'	No'	×'	×'	No'	AB'	Pharynx'
ABplappapp'	No'	×'	×'	No'	AB'	Skin'
ABaraappapp'	No'	×'	×'	No'	AB'	Pharynx'
ABplapppaa'	Yes'	×'	√'	No'	AB'	Unspecified'
ABaraapppaa'	No'	×'	×'	No'	AB'	Unspecified'
ABplapppap'	Yes'	×'	√'	No'	AB'	Unspecified'
ABaraapppap'	No'	×'	×'	No'	AB'	Pharynx'
ABplappppa'	No'	×'	×'	No'	AB'	Skin'
ABaraappppa'	No'	×'	×'	No'	AB'	Pharynx'
ABplappppp'	No'	×'	×'	No'	AB'	Skin'
ABaraappppp'	No'	×'	×'	No'	AB'	Pharynx'
ABplpaaaaa'	Yes'	×'	√'	No'	AB'	Neuron'
ABarapaaaaa'	No'	×'	×'	No'	AB'	Pharynx'
ABplpaaaap'	Yes'	×'	√'	No'	AB'	Unspecified'
ABarapaaaap'	No'	×'	×'	No'	AB'	Pharynx'
ABplpaaapa'	Yes'	×'	√'	No'	AB'	Neuron'
ABarapaaapa'	No'	×'	×'	No'	AB'	Pharynx'
ABplpaaapp'	Yes'	×'	√'	No'	AB'	Unspecified'
ABarapaaapp'	No'	×'	×'	Yes'	AB'	Death'
ABplpaapaa'	Yes'	×'	√'	No'	AB'	Neuron'
ABarapaapaa'	No'	×'	×'	No'	AB'	Pharynx'
ABplpaapap'	Yes'	×'	√'	No'	AB'	Unspecified'
ABarapaapap'	No'	×'	×'	Yes'	AB'	Death'
ABplpaappa'	Yes'	×'	√'	No'	AB'	Neuron'
ABarapaappa'	No'	×'	×'	No'	AB'	Pharynx'
ABplpaappp'	Yes'	×'	√'	No'	AB'	Unspecified'
ABarapaappp'	No'	×'	×'	No'	AB'	Pharynx'
ABplpapaaa'	Yes'	×'	√'	No'	AB'	Neuron'
ABarapapaaa'	No'	×'	×'	Yes'	AB'	Death'
ABplpapaap'	Yes'	×'	√'	No'	AB'	Neuron'
ABarapapaap'	No'	×'	×'	No'	AB'	Unspecified'
ABplpapapa'	Yes'	×'	√'	No'	AB'	Unspecified'
ABarapapapa'	No'	×'	×'	No'	AB'	Skin'
ABplpapapp'	Yes'	×'	√'	No'	AB'	Neuron'
ABarapapapp'	No'	×'	×'	No'	AB'	Pharynx'
ABplpappaa'	Yes'	×'	√'	No'	AB'	Unspecified'
ABarapappaa'	No'	×'	×'	No'	AB'	Pharynx'
ABplpappap'	No'	×'	×'	Yes'	AB'	Death'
ABarapappap'	No'	×'	×'	Yes'	AB'	Death'
ABplpapppa'	Yes'	×'	√'	No'	AB'	Other'
ABarapapppa'	No'	×'	×'	No'	AB'	Pharynx'
ABplpapppp'	Yes'	×'	√'	No'	AB'	Unspecified'
ABarapapppp'	No'	×'	×'	No'	AB'	Pharynx'
ABplppaaaa'	Yes'	×'	√'	No'	AB'	Unspecified'
ABarappaaaa'	No'	×'	×'	No'	AB'	Neuron'
ABplppaaap'	No'	×'	×'	Yes'	AB'	Death'
ABarappaaap'	No'	×'	×'	Yes'	AB'	Death'
ABplppaapa'	Yes'	×'	√'	No'	AB'	Unspecified'
ABarappaapa'	No'	×'	×'	No'	AB'	Skin'
ABplppaapp'	Yes'	×'	√'	No'	AB'	Neuron'
ABarappaapp'	No'	×'	×'	Yes'	AB'	Death'
ABplppapaa'	Yes'	×'	√'	No'	AB'	Neuron'
ABarappapaa'	No'	×'	×'	No'	AB'	Neuron'
ABplppapap'	No'	×'	×'	No'	AB'	Neuron'
ABarappapap'	No'	×'	×'	No'	AB'	Unspecified'
ABplppappa'	Yes'	×'	√'	No'	AB'	Neuron'
ABarappappa'	No'	×'	×'	No'	AB'	Neuron'
ABplppappp'	Yes'	×'	√'	No'	AB'	Neuron'
ABarappappp'	No'	×'	×'	No'	AB'	Neuron'
ABplpppaaa'	Yes'	×'	√'	No'	AB'	Neuron'
ABarapppaaa'	No'	×'	×'	No'	AB'	Neuron'
ABplpppaap'	Yes'	×'	√'	No'	AB'	Neuron'
ABarapppaap'	No'	×'	×'	No'	AB'	Neuron'
ABplpppapa'	Yes'	×'	√'	No'	AB'	Unspecified'
ABarapppapa'	No'	×'	×'	No'	AB'	Neuron'
ABplpppapp'	No'	×'	×'	Yes'	AB'	Death'
ABarapppapp'	No'	×'	×'	No'	AB'	Neuron'
ABplppppaa'	Yes'	×'	√'	No'	AB'	Unspecified'
ABarappppaa'	No'	×'	×'	No'	AB'	Neuron'
ABplppppap'	Yes'	×'	√'	No'	AB'	Other'
ABarappppap'	No'	×'	×'	No'	AB'	Neuron'
ABplpppppa'	Yes'	×'	√'	No'	AB'	Other'
ABarapppppa'	No'	×'	×'	No'	AB'	Unspecified'
ABplpppppp'	Yes'	×'	√'	No'	AB'	Unspecified'
ABarapppppp'	No'	×'	×'	No'	AB'	Neuron'
ABpraaaaaa'	Yes'	×'	√'	No'	AB'	Neuron'
ABarpaaaaal'	No'	×'	×'	No'	AB'	Neuron'
ABpraaaaap'	Yes'	×'	√'	No'	AB'	Unspecified'
ABarpaaaaar'	No'	×'	×'	No'	AB'	Neuron'
ABpraaaapa'	No'	×'	×'	No'	AB'	Neuron'
ABarpaaaapa'	No'	×'	×'	No'	AB'	Neuron'
ABpraaaapp'	No'	×'	×'	No'	AB'	Unspecified'
ABarpaaaapp'	No'	×'	×'	No'	AB'	Neuron'
ABpraaapaa'	Yes'	×'	√'	No'	AB'	Unspecified'
ABarpaaapaa'	No'	×'	×'	No'	AB'	Neuron'
ABpraaapap'	Yes'	×'	√'	No'	AB'	Unspecified'
ABarpaaapap'	No'	×'	×'	No'	AB'	Neuron'
ABpraaappa'	Yes'	×'	√'	No'	AB'	Neuron'
ABpraaappp'	Yes'	×'	√'	No'	AB'	Unspecified'
ABpraapaaa'	Yes'	×'	√'	No'	AB'	Unspecified'
ABpraapaap'	Yes'	×'	√'	No'	AB'	Neuron'
ABpraapapa'	Yes'	×'	√'	No'	AB'	Neuron'
ABpraapapp'	Yes'	×'	√'	No'	AB'	Unspecified'
ABpraappaa'	No'	×'	×'	No'	AB'	Skin'
ABpraappap'	No'	×'	×'	No'	AB'	Skin'
ABpraapppa'	No'	×'	×'	No'	AB'	Skin'
ABpraapppp'	No'	×'	×'	No'	AB'	Skin'
ABprapaaaa'	Yes'	×'	√'	No'	AB'	Unspecified'
ABarpapaaaa'	No'	×'	×'	No'	AB'	Neuron'
ABprapaaap'	Yes'	×'	√'	No'	AB'	Neuron'
ABarpapaaap'	No'	×'	×'	Yes'	AB'	Death'
ABprapaapa'	No'	×'	×'	No'	AB'	Other'
ABarpapaapa'	No'	×'	×'	Yes'	AB'	Death'
ABprapaapp'	No'	×'	×'	No'	AB'	Skin'
ABarpapaapp'	No'	×'	×'	No'	AB'	Neuron'
ABprapapaa'	No'	×'	×'	No'	AB'	Unspecified'
ABprapapap'	No'	×'	×'	No'	AB'	Skin'
ABprapappa'	No'	×'	×'	No'	AB'	Skin'
ABprapappp'	Yes'	×'	√'	No'	AB'	Unspecified'
ABprappaaa'	No'	×'	×'	No'	AB'	Skin'
ABprappaap'	No'	×'	×'	No'	AB'	Skin'
ABprappapa'	No'	×'	×'	No'	AB'	Skin'
ABprappapp'	No'	×'	×'	No'	AB'	Skin'
ABprapppaa'	Yes'	×'	√'	No'	AB'	Unspecified'
ABprapppap'	Yes'	×'	√'	No'	AB'	Unspecified'
ABprappppa'	No'	×'	×'	No'	AB'	Skin'
ABprappppp'	No'	×'	×'	No'	AB'	Skin'
ABprpaaaaa'	Yes'	×'	√'	No'	AB'	Neuron'
ABprpaaaap'	Yes'	×'	√'	No'	AB'	Unspecified'
ABprpaaapa'	Yes'	×'	√'	No'	AB'	Neuron'
ABprpaaapp'	Yes'	×'	√'	No'	AB'	Unspecified'
ABprpaapaa'	Yes'	×'	√'	No'	AB'	Neuron'
ABprpaapap'	Yes'	×'	√'	No'	AB'	Unspecified'
ABprpaappa'	Yes'	×'	√'	No'	AB'	Neuron'
ABprpaappp'	Yes'	×'	√'	No'	AB'	Unspecified'
ABprpapaaa'	Yes'	×'	√'	No'	AB'	Neuron'
ABprpapaap'	Yes'	×'	√'	No'	AB'	Neuron'
ABprpapapa'	Yes'	×'	√'	No'	AB'	Unspecified'
ABprpapapp'	Yes'	×'	√'	No'	AB'	Neuron'
ABprpappaa'	Yes'	×'	√'	No'	AB'	Neuron'
ABprpappap'	Yes'	×'	√'	No'	AB'	Neuron'
ABprpapppa'	Yes'	×'	√'	No'	AB'	Neuron'
ABprpapppp'	Yes'	×'	√'	No'	AB'	Other'
ABprppaaaa'	Yes'	×'	√'	No'	AB'	Unspecified'
ABprppaaap'	No'	×'	×'	Yes'	AB'	Death'
ABprppaapa'	Yes'	×'	√'	No'	AB'	Unspecified'
ABprppaapp'	Yes'	×'	√'	No'	AB'	Neuron'
ABprppapaa'	Yes'	×'	√'	No'	AB'	Neuron'
ABprppapap'	Yes'	×'	√'	No'	AB'	Neuron'
ABprppappa'	Yes'	×'	√'	No'	AB'	Neuron'
ABprppappp'	Yes'	×'	√'	No'	AB'	Neuron'
ABprpppaaa'	Yes'	×'	√'	No'	AB'	Unspecified'
ABprpppaap'	Yes'	×'	√'	No'	AB'	Neuron'
ABprpppapa'	Yes'	×'	√'	No'	AB'	Unspecified'
ABprpppapp'	No'	×'	×'	Yes'	AB'	Death'
ABprppppaa'	Yes'	×'	√'	No'	AB'	Unspecified'
ABprppppap'	Yes'	×'	√'	No'	AB'	Unspecified'
ABprpppppa'	Yes'	×'	√'	No'	AB'	Unspecified'
ABprpppppp'	Yes'	×'	√'	No'	AB'	Unspecified'
ABplaaaaaaa'	No'	×'	×'	No'	AB'	Neuron'
ABplaaaaaap'	No'	×'	×'	Yes'	AB'	Death'
ABplaaaaapa'	No'	×'	×'	Yes'	AB'	Death'
ABplaaaaapp'	No'	×'	×'	No'	AB'	Neuron'
ABplaapaaaa'	No'	×'	×'	No'	AB'	Skin'
ABplaapaaap'	No'	×'	×'	No'	AB'	Neuron'
ABplaapaapa'	No'	×'	×'	No'	AB'	Neuron'
ABplaapaapp'	No'	×'	×'	No'	AB'	Neuron'
ABplaapapaa'	No'	×'	×'	No'	AB'	Neuron'
ABplaapapap'	No'	×'	×'	No'	AB'	Neuron'
ABplaapappa'	No'	×'	×'	No'	AB'	Neuron'
ABplaapappp'	No'	×'	×'	No'	AB'	Unspecified'
ABplapaaaaa'	No'	×'	×'	Yes'	AB'	Death'
ABplapaaaap'	No'	×'	×'	No'	AB'	Neuron'
ABplapaaapa'	No'	×'	×'	No'	AB'	Neuron'
ABplapaaapp'	No'	×'	×'	No'	AB'	Neuron'
ABplapapppa'	No'	×'	×'	Yes'	AB'	Death'
ABplapapppp'	No'	×'	×'	No'	AB'	Unspecified'
ABplapppaaa'	No'	×'	×'	No'	AB'	Neuron'
ABplapppaap'	No'	×'	×'	Yes'	AB'	Death'
ABplapppapa'	No'	×'	×'	Yes'	AB'	Death'
ABplapppapp'	No'	×'	×'	No'	AB'	Neuron'
ABplpaaaaaa'	No'	×'	×'	No'	AB'	Neuron'
ABplpaaaaap'	No'	×'	×'	No'	AB'	Neuron'
ABplpaaaapa'	No'	×'	×'	No'	AB'	Other'
ABplpaaaapp'	No'	×'	×'	No'	AB'	Neuron'
ABplpaaapaa'	No'	×'	×'	No'	AB'	Neuron'
ABplpaaapap'	No'	×'	×'	No'	AB'	Neuron'
ABplpaaappa'	No'	×'	×'	No'	AB'	Unspecified'
ABplpaaappp'	No'	×'	×'	No'	AB'	Neuron'
ABplpaapaaa'	No'	×'	×'	No'	AB'	Neuron'
ABplpaapaap'	No'	×'	×'	No'	AB'	Neuron'
ABplpaapapa'	No'	×'	×'	No'	AB'	Neuron'
ABplpaapapp'	No'	×'	×'	Yes'	AB'	Death'
ABplpaappaa'	No'	×'	×'	No'	AB'	Neuron'
ABplpaappap'	No'	×'	×'	No'	AB'	Neuron'
ABplpaapppa'	No'	×'	×'	No'	AB'	Neuron'
ABplpaapppp'	No'	×'	×'	No'	AB'	Unspecified'
ABplpapaaaa'	No'	×'	×'	No'	AB'	Neuron'
ABplpapaaap'	No'	×'	×'	No'	AB'	Neuron'
ABplpapaapa'	No'	×'	×'	No'	AB'	Neuron'
ABplpapaapp'	No'	×'	×'	No'	AB'	Neuron'
ABplpapapaa'	No'	×'	×'	No'	AB'	Other'
ABplpapapap'	No'	×'	×'	No'	AB'	Neuron'
ABplpapappa'	No'	×'	×'	No'	AB'	Neuron'
ABplpapappp'	No'	×'	×'	No'	AB'	Neuron'
ABplpappaaa'	No'	×'	×'	No'	AB'	Neuron'
ABplpappaap'	No'	×'	×'	No'	AB'	Other'
ABplpapppaa'	No'	×'	×'	No'	AB'	Other'
ABplpapppap'	No'	×'	×'	No'	AB'	Other'
ABplpappppa'	No'	×'	×'	No'	AB'	Neuron'
ABplpappppp'	No'	×'	×'	No'	AB'	Other'
ABplppaaaaa'	No'	×'	×'	No'	AB'	Neuron'
ABplppaaaap'	No'	×'	×'	No'	AB'	Unspecified'
ABplppaapaa'	No'	×'	×'	Yes'	AB'	Death'
ABplppaapap'	No'	×'	×'	No'	AB'	Neuron'
ABplppaappa'	No'	×'	×'	No'	AB'	Neuron'
ABplppaappp'	No'	×'	×'	No'	AB'	Neuron'
ABplppapaaa'	No'	×'	×'	No'	AB'	Neuron'
ABplppapaap'	No'	×'	×'	No'	AB'	Neuron'
ABplppappaa'	No'	×'	×'	No'	AB'	Neuron'
ABplppappap'	No'	×'	×'	No'	AB'	Neuron'
ABplppapppa'	No'	×'	×'	No'	AB'	Neuron'
ABplppapppp'	No'	×'	×'	No'	AB'	Neuron'
ABplpppaaaa'	No'	×'	×'	No'	AB'	Neuron'
ABplpppaaap'	No'	×'	×'	No'	AB'	Neuron'
ABplpppaapa'	No'	×'	×'	No'	AB'	Neuron'
ABplpppaapp'	No'	×'	×'	No'	AB'	Neuron'
ABplpppapaa'	No'	×'	×'	No'	AB'	Neuron'
ABplpppapap'	No'	×'	×'	No'	AB'	Skin'
ABplppppaaa'	No'	×'	×'	No'	AB'	Neuron'
ABplppppaap'	No'	×'	×'	No'	AB'	Other'
ABplppppapa'	No'	×'	×'	No'	AB'	Other'
ABplppppapp'	No'	×'	×'	No'	AB'	Other'
ABplpppppaa'	No'	×'	×'	No'	AB'	Other'
ABplpppppap'	No'	×'	×'	No'	AB'	Other'
ABplppppppa'	No'	×'	×'	Yes'	AB'	Death'
ABplppppppp'	No'	×'	×'	No'	AB'	Skin'
ABpraaaaaaa'	No'	×'	×'	No'	AB'	Neuron'
ABpraaaaaap'	No'	×'	×'	No'	AB'	Neuron'
ABpraaaaapd'	No'	×'	×'	No'	AB'	Neuron'
ABpraaaaapv'	No'	×'	×'	Yes'	AB'	Death'
ABpraaapaad'	No'	×'	×'	No'	AB'	Neuron'
ABpraaapaav'	No'	×'	×'	Yes'	AB'	Death'
ABpraaapapa'	No'	×'	×'	No'	AB'	Unspecified'
ABpraaapapp'	No'	×'	×'	Yes'	AB'	Death'
ABpraaappaa'	No'	×'	×'	No'	AB'	Neuron'
ABpraaappap'	No'	×'	×'	No'	AB'	Neuron'
ABpraaapppa'	No'	×'	×'	No'	AB'	Unspecified'
ABpraaapppp'	No'	×'	×'	No'	AB'	Neuron'
ABpraapaaaa'	No'	×'	×'	No'	AB'	Skin'
ABpraapaaap'	No'	×'	×'	No'	AB'	Neuron'
ABpraapaapa'	No'	×'	×'	No'	AB'	Neuron'
ABpraapaapp'	No'	×'	×'	No'	AB'	Neuron'
ABpraapapaa'	No'	×'	×'	No'	AB'	Neuron'
ABpraapapap'	No'	×'	×'	No'	AB'	Neuron'
ABpraapappa'	No'	×'	×'	No'	AB'	Neuron'
ABpraapappp'	No'	×'	×'	No'	AB'	Unspecified'
ABprapaaaaa'	No'	×'	×'	Yes'	AB'	Death'
ABprapaaaap'	No'	×'	×'	No'	AB'	Neuron'
ABprapaaapa'	No'	×'	×'	No'	AB'	Neuron'
ABprapaaapp'	No'	×'	×'	No'	AB'	Neuron'
ABprapapppa'	No'	×'	×'	Yes'	AB'	Death'
ABprapapppp'	No'	×'	×'	No'	AB'	Unspecified'
ABprapppaaa'	No'	×'	×'	No'	AB'	Neuron'
ABprapppaap'	No'	×'	×'	Yes'	AB'	Death'
ABprapppapa'	No'	×'	×'	Yes'	AB'	Death'
ABprapppapp'	No'	×'	×'	No'	AB'	Neuron'
ABprpaaaaaa'	No'	×'	×'	No'	AB'	Neuron'
ABprpaaaaap'	No'	×'	×'	No'	AB'	Neuron'
ABprpaaaapa'	No'	×'	×'	No'	AB'	Other'
ABprpaaaapp'	No'	×'	×'	No'	AB'	Neuron'
ABprpaaapaa'	No'	×'	×'	No'	AB'	Neuron'
ABprpaaapap'	No'	×'	×'	No'	AB'	Neuron'
ABprpaaappa'	No'	×'	×'	No'	AB'	Unspecified'
ABprpaaappp'	No'	×'	×'	No'	AB'	Neuron'
ABprpaapaaa'	No'	×'	×'	No'	AB'	Neuron'
ABprpaapaap'	No'	×'	×'	No'	AB'	Neuron'
ABprpaapapa'	No'	×'	×'	No'	AB'	Neuron'
ABprpaapapp'	No'	×'	×'	Yes'	AB'	Death'
ABprpaappaa'	No'	×'	×'	No'	AB'	Neuron'
ABprpaappap'	No'	×'	×'	No'	AB'	Neuron'
ABprpaapppa'	No'	×'	×'	No'	AB'	Neuron'
ABprpaapppp'	No'	×'	×'	No'	AB'	Unspecified'
ABprpapaaaa'	No'	×'	×'	No'	AB'	Neuron'
ABprpapaaap'	No'	×'	×'	No'	AB'	Neuron'
ABprpapaapa'	No'	×'	×'	No'	AB'	Neuron'
ABprpapaapp'	No'	×'	×'	No'	AB'	Neuron'
ABprpapapaa'	No'	×'	×'	No'	AB'	Other'
ABprpapapap'	No'	×'	×'	No'	AB'	Neuron'
ABprpapappa'	No'	×'	×'	No'	AB'	Neuron'
ABprpapappp'	No'	×'	×'	No'	AB'	Neuron'
ABprpappaaa'	No'	×'	×'	No'	AB'	Neuron'
ABprpappaap'	No'	×'	×'	No'	AB'	Neuron'
ABprpappapa'	No'	×'	×'	No'	AB'	Neuron'
ABprpappapp'	No'	×'	×'	No'	AB'	Neuron'
ABprpapppaa'	No'	×'	×'	No'	AB'	Neuron'
ABprpapppap'	No'	×'	×'	No'	AB'	Neuron'
ABprpappppa'	No'	×'	×'	No'	AB'	Other'
ABprpappppp'	No'	×'	×'	No'	AB'	Other'
ABprppaaaaa'	No'	×'	×'	No'	AB'	Neuron'
ABprppaaaap'	No'	×'	×'	No'	AB'	Unspecified'
ABprppaapaa'	No'	×'	×'	Yes'	AB'	Death'
ABprppaapap'	No'	×'	×'	No'	AB'	Neuron'
ABprppaappa'	No'	×'	×'	No'	AB'	Neuron'
ABprppaappp'	No'	×'	×'	No'	AB'	Neuron'
ABprppapaaa'	No'	×'	×'	No'	AB'	Neuron'
ABprppapaap'	No'	×'	×'	No'	AB'	Neuron'
ABprppapapa'	No'	×'	×'	No'	AB'	Neuron'
ABprppapapp'	No'	×'	×'	No'	AB'	Neuron'
ABprppappaa'	No'	×'	×'	No'	AB'	Neuron'
ABprppappap'	No'	×'	×'	No'	AB'	Neuron'
ABprppapppa'	No'	×'	×'	No'	AB'	Neuron'
ABprppapppp'	No'	×'	×'	No'	AB'	Neuron'
ABprpppaaaa'	No'	×'	×'	No'	AB'	Other'
ABprpppaaap'	No'	×'	×'	No'	AB'	Neuron'
ABprpppaapa'	No'	×'	×'	No'	AB'	Neuron'
ABprpppaapp'	No'	×'	×'	No'	AB'	Neuron'
ABprpppapaa'	No'	×'	×'	No'	AB'	Neuron'
ABprpppapap'	No'	×'	×'	No'	AB'	Skin'
ABprppppaaa'	No'	×'	×'	No'	AB'	Neuron'
ABprppppaap'	No'	×'	×'	No'	AB'	Other'
ABprppppapa'	No'	×'	×'	No'	AB'	Other'
ABprppppapp'	No'	×'	×'	No'	AB'	Neuron'
ABprpppppaa'	No'	×'	×'	No'	AB'	Muscle'
ABprpppppap'	No'	×'	×'	No'	AB'	Other'
ABprppppppa'	No'	×'	×'	Yes'	AB'	Death'
ABprppppppp'	No'	×'	×'	No'	AB'	Skin'
MS'	Yes'	√'	×'	No'	MS'	Unspecified'
MSa'	Yes'	√'	×'	No'	MS'	Unspecified'
MSaa'	Yes'	√'	×'	No'	MS'	Unspecified'
MSaaa'	Yes'	√'	×'	No'	MS'	Unspecified'
MSaaaa'	Yes'	√'	×'	No'	MS'	Unspecified'
MSaaaaa'	Yes'	×'	√'	No'	MS'	Unspecified'
MSaaaaaa'	No'	×'	×'	No'	MS'	Other'
MSp'	Yes'	√'	×'	No'	MS'	Unspecified'
MSap'	Yes'	√'	×'	No'	MS'	Unspecified'
MSaap'	Yes'	√'	×'	No'	MS'	Unspecified'
MSaaap'	Yes'	√'	×'	No'	MS'	Unspecified'
MSaaaap'	Yes'	×'	√'	No'	MS'	Unspecified'
MSaaaaap'	Yes'	×'	√'	No'	MS'	Pharynx'
MSpa'	Yes'	√'	×'	No'	MS'	Unspecified'
MSapa'	Yes'	√'	×'	No'	MS'	Unspecified'
MSaapa'	Yes'	√'	×'	No'	MS'	Unspecified'
MSaaapa'	Yes'	×'	√'	No'	MS'	Pharynx'
MSaaaapa'	Yes'	×'	√'	No'	MS'	Pharynx'
MSaaaaapa'	No'	×'	×'	No'	MS'	Pharynx'
MSpp'	Yes'	√'	×'	No'	MS'	Unspecified'
MSapp'	Yes'	√'	×'	No'	MS'	Unspecified'
MSaapp'	Yes'	√'	×'	No'	MS'	Unspecified'
MSaaapp'	Yes'	×'	√'	No'	MS'	Unspecified'
MSaaaapp'	Yes'	×'	√'	No'	MS'	Unspecified'
MSaaaaapp'	No'	×'	×'	No'	MS'	Pharynx'
MSpaa'	Yes'	√'	×'	No'	MS'	Unspecified'
MSapaa'	Yes'	√'	×'	No'	MS'	Unspecified'
MSaapaa'	Yes'	×'	√'	No'	MS'	Unspecified'
MSaaapaa'	Yes'	×'	√'	No'	MS'	Pharynx'
MSaaaapaa'	No'	×'	×'	No'	MS'	Pharynx'
MSpap'	Yes'	√'	×'	No'	MS'	Unspecified'
MSapap'	Yes'	√'	×'	No'	MS'	Unspecified'
MSaapap'	Yes'	×'	√'	No'	MS'	Unspecified'
MSaaapap'	Yes'	×'	√'	No'	MS'	Pharynx'
MSaaaapap'	No'	×'	×'	No'	MS'	Pharynx'
MSppa'	Yes'	√'	×'	No'	MS'	Unspecified'
MSappa'	Yes'	√'	×'	No'	MS'	Unspecified'
MSaappa'	Yes'	×'	√'	No'	MS'	Other'
MSaaappa'	No'	×'	×'	Yes'	MS'	Death'
MSaaaappa'	No'	×'	×'	Yes'	MS'	Death'
MSppp'	Yes'	√'	×'	No'	MS'	Unspecified'
MSappp'	Yes'	√'	×'	No'	MS'	Muscle'
MSaappp'	Yes'	×'	√'	No'	MS'	Muscle'
MSaaappp'	No'	×'	×'	No'	MS'	Other'
MSaaaappp'	No'	×'	×'	No'	MS'	Pharynx'
MSpaaa'	Yes'	√'	×'	No'	MS'	Unspecified'
MSapaaa'	Yes'	×'	√'	No'	MS'	Unspecified'
MSaapaaa'	Yes'	×'	√'	No'	MS'	Pharynx'
MSaaapaaa'	No'	×'	×'	No'	MS'	Pharynx'
MSpaap'	Yes'	√'	×'	No'	MS'	Unspecified'
MSapaap'	Yes'	×'	√'	No'	MS'	Unspecified'
MSaapaap'	Yes'	×'	√'	No'	MS'	Unspecified'
MSaaapaap'	No'	×'	×'	No'	MS'	Pharynx'
MSpapa'	Yes'	√'	×'	No'	MS'	Unspecified'
MSapapa'	Yes'	×'	√'	No'	MS'	Unspecified'
MSaapapa'	No'	×'	×'	No'	MS'	Unspecified'
MSaaapapa'	No'	×'	×'	No'	MS'	Pharynx'
MSpapp'	Yes'	√'	×'	No'	MS'	Muscle'
MSapapp'	Yes'	×'	√'	No'	MS'	Muscle'
MSaapapp'	Yes'	×'	√'	No'	MS'	Unspecified'
MSaaapapp'	No'	×'	×'	No'	MS'	Pharynx'
MSppaa'	Yes'	√'	×'	No'	MS'	Unspecified'
MSappaa'	Yes'	×'	√'	No'	MS'	Other'
MSaappaa'	No'	×'	×'	No'	MS'	Other'
MSppap'	Yes'	√'	×'	No'	MS'	Unspecified'
MSappap'	Yes'	×'	√'	No'	MS'	Unspecified'
MSaappap'	No'	×'	×'	No'	MS'	Other'
MSpppa'	Yes'	√'	×'	No'	MS'	Unspecified'
MSapppa'	Yes'	×'	√'	No'	MS'	Muscle'
MSaapppa'	No'	×'	×'	No'	MS'	Muscle'
MSpppp'	Yes'	√'	×'	No'	MS'	Muscle'
MSapppp'	Yes'	×'	√'	No'	MS'	Muscle'
MSaapppp'	No'	×'	×'	No'	MS'	Muscle'
MSpaaaa'	Yes'	×'	√'	No'	MS'	Unspecified'
MSapaaaa'	No'	×'	×'	No'	MS'	Other'
MSaapaaaa'	No'	×'	×'	No'	MS'	Pharynx'
MSpaaap'	Yes'	×'	√'	No'	MS'	Pharynx'
MSapaaap'	No'	×'	×'	No'	MS'	Muscle'
MSaapaaap'	No'	×'	×'	No'	MS'	Pharynx'
MSpaapa'	Yes'	×'	√'	No'	MS'	Unspecified'
MSapaapa'	No'	×'	×'	Yes'	MS'	Death'
MSaapaapa'	No'	×'	×'	No'	MS'	Unspecified'
MSpaapp'	No'	×'	×'	Yes'	MS'	Death'
MSapaapp'	No'	×'	×'	No'	MS'	Other'
MSaapaapp'	No'	×'	×'	No'	MS'	Pharynx'
MSpapaa'	Yes'	×'	√'	No'	MS'	Unspecified'
MSapapaa'	No'	×'	×'	No'	MS'	Other'
MSpapap'	Yes'	×'	√'	No'	MS'	Unspecified'
MSapapap'	No'	×'	×'	No'	MS'	Muscle'
MSpappa'	Yes'	×'	√'	No'	MS'	Muscle'
MSapappa'	No'	×'	×'	No'	MS'	Muscle'
MSaapappa'	No'	×'	×'	No'	MS'	Pharynx'
MSpappp'	Yes'	×'	√'	No'	MS'	Muscle'
MSapappp'	No'	×'	×'	No'	MS'	Muscle'
MSaapappp'	No'	×'	×'	No'	MS'	Other'
MSppaaa'	Yes'	×'	√'	No'	MS'	Unspecified'
MSappaaa'	No'	×'	×'	No'	MS'	Other'
MSppaap'	Yes'	×'	√'	No'	MS'	Unspecified'
MSappaap'	No'	×'	×'	No'	MS'	Other'
MSppapa'	Yes'	×'	√'	No'	MS'	Unspecified'
MSappapa'	No'	×'	×'	Yes'	MS'	Death'
MSppapp'	Yes'	×'	√'	No'	MS'	Muscle'
MSappapp'	No'	×'	×'	No'	MS'	Muscle'
MSpppaa'	Yes'	×'	√'	No'	MS'	Unspecified'
MSapppaa'	No'	×'	×'	No'	MS'	Muscle'
MSpppap'	Yes'	×'	√'	No'	MS'	Unspecified'
MSapppap'	No'	×'	×'	No'	MS'	Muscle'
MSppppa'	Yes'	×'	√'	No'	MS'	Muscle'
MSappppa'	No'	×'	×'	No'	MS'	Muscle'
MSppppp'	Yes'	×'	√'	No'	MS'	Muscle'
MSappppp'	No'	×'	×'	No'	MS'	Muscle'
MSpaaaaa'	Yes'	×'	√'	No'	MS'	Unspecified'
MSpaaaap'	Yes'	×'	√'	No'	MS'	Pharynx'
MSpaaapa'	Yes'	×'	√'	No'	MS'	Pharynx'
MSpaaapp'	Yes'	×'	√'	No'	MS'	Pharynx'
MSpaapaa'	Yes'	×'	√'	No'	MS'	Unspecified'
MSpaapap'	Yes'	×'	√'	No'	MS'	Unspecified'
MSpapaaa'	Yes'	×'	√'	No'	MS'	Pharynx'
MSpapaap'	Yes'	×'	√'	No'	MS'	Unspecified'
MSpapapa'	Yes'	×'	√'	No'	MS'	Unspecified'
MSpapapp'	Yes'	×'	√'	No'	MS'	Unspecified'
MSpappaa'	No'	×'	×'	No'	MS'	Muscle'
MSpappap'	No'	×'	×'	No'	MS'	Muscle'
MSpapppa'	No'	×'	×'	No'	MS'	Muscle'
MSpapppp'	No'	×'	×'	No'	MS'	Muscle'
MSppaaaa'	No'	×'	×'	No'	MS'	Other'
MSppaaap'	No'	×'	×'	No'	MS'	Muscle'
MSppaapa'	No'	×'	×'	Yes'	MS'	Death'
MSppaapp'	No'	×'	×'	No'	MS'	Other'
MSppapaa'	No'	×'	×'	No'	MS'	Other'
MSppapap'	No'	×'	×'	No'	MS'	Muscle'
MSppappa'	No'	×'	×'	No'	MS'	Muscle'
MSppappp'	No'	×'	×'	No'	MS'	Muscle'
MSpppaaa'	No'	×'	×'	Yes'	MS'	Death'
MSpppaap'	No'	×'	×'	No'	MS'	Other'
MSpppapa'	No'	×'	×'	Yes'	MS'	Death'
MSpppapp'	No'	×'	×'	No'	MS'	Muscle'
MSppppaa'	No'	×'	×'	No'	MS'	Muscle'
MSppppap'	No'	×'	×'	No'	MS'	Muscle'
MSpppppa'	No'	×'	×'	No'	MS'	Muscle'
MSpppppp'	No'	×'	×'	No'	MS'	Muscle'
MSpaaaaaa'	No'	×'	×'	No'	MS'	Pharynx'
MSpaaaaap'	No'	×'	×'	Yes'	MS'	Death'
MSpaaaapa'	No'	×'	×'	No'	MS'	Pharynx'
MSpaaaapp'	No'	×'	×'	No'	MS'	Pharynx'
MSpaaapaa'	No'	×'	×'	No'	MS'	Pharynx'
MSpaaapap'	No'	×'	×'	No'	MS'	Pharynx'
MSpaaappa'	No'	×'	×'	No'	MS'	Pharynx'
MSpaaappp'	No'	×'	×'	No'	MS'	Pharynx'
MSpaapaaa'	No'	×'	×'	No'	MS'	Pharynx'
MSpaapaap'	No'	×'	×'	Yes'	MS'	Death'
MSpaapapa'	No'	×'	×'	No'	MS'	Pharynx'
MSpaapapp'	No'	×'	×'	No'	MS'	Other'
MSpapaaaa'	No'	×'	×'	No'	MS'	Pharynx'
MSpapaaap'	No'	×'	×'	No'	MS'	Pharynx'
MSpapaapa'	No'	×'	×'	No'	MS'	Unspecified'
MSpapaapp'	No'	×'	×'	No'	MS'	Pharynx'
MSpapapaa'	No'	×'	×'	No'	MS'	Pharynx'
MSpapapap'	No'	×'	×'	Yes'	MS'	Death'
MSpapappa'	No'	×'	×'	No'	MS'	Pharynx'
MSpapappp'	No'	×'	×'	No'	MS'	Other'
E'	Yes'	√'	×'	No'	E'	Intestine'
Ea'	Yes'	√'	×'	No'	E'	Intestine'
Eal'	Yes'	√'	×'	No'	E'	Intestine'
Eala'	Yes'	√'	×'	No'	E'	Intestine'
Ealaa'	No'	×'	×'	No'	E'	Intestine'
Ep'	Yes'	√'	×'	No'	E'	Intestine'
Ear'	Yes'	√'	×'	No'	E'	Intestine'
Ealp'	Yes'	√'	×'	No'	E'	Intestine'
Ealap'	No'	×'	×'	No'	E'	Intestine'
Epl'	Yes'	√'	×'	No'	E'	Intestine'
Eara'	Yes'	√'	×'	No'	E'	Intestine'
Ealpa'	No'	×'	×'	No'	E'	Intestine'
Epr'	Yes'	√'	×'	No'	E'	Intestine'
Earp'	Yes'	√'	×'	No'	E'	Intestine'
Ealpp'	No'	×'	×'	No'	E'	Intestine'
Epla'	Yes'	√'	×'	No'	E'	Intestine'
Earaa'	No'	×'	×'	No'	E'	Intestine'
Eplp'	Yes'	√'	×'	No'	E'	Intestine'
Earap'	No'	×'	×'	No'	E'	Intestine'
Epra'	Yes'	√'	×'	No'	E'	Intestine'
Earpa'	No'	×'	×'	No'	E'	Intestine'
Eprp'	Yes'	√'	×'	No'	E'	Intestine'
Earpp'	No'	×'	×'	No'	E'	Intestine'
Eplaa'	No'	×'	×'	No'	E'	Intestine'
Eplap'	No'	×'	×'	No'	E'	Intestine'
Eplpa'	No'	×'	×'	No'	E'	Intestine'
Eplpp'	No'	×'	×'	No'	E'	Intestine'
Epraa'	No'	×'	×'	No'	E'	Intestine'
Eprap'	No'	×'	×'	No'	E'	Intestine'
Eprpa'	No'	×'	×'	No'	E'	Intestine'
Eprpp'	No'	×'	×'	No'	E'	Intestine'
C'	Yes'	√'	×'	No'	C'	Unspecified'
Ca'	Yes'	√'	×'	No'	C'	Unspecified'
Caa'	Yes'	√'	×'	No'	C'	Unspecified'
Caaa'	Yes'	√'	×'	No'	C'	Skin'
Caaaa'	Yes'	×'	√'	No'	C'	Skin'
Caaaaa'	No'	×'	×'	No'	C'	Skin'
Cp'	Yes'	√'	×'	No'	C'	Unspecified'
Cap'	Yes'	√'	×'	No'	C'	Muscle'
Caap'	Yes'	√'	×'	No'	C'	Unspecified'
Caaap'	Yes'	×'	√'	No'	C'	Skin'
Caaaap'	No'	×'	×'	No'	C'	Skin'
Cpa'	Yes'	√'	×'	No'	C'	Skin'
Capa'	Yes'	√'	×'	No'	C'	Muscle'
Caapa'	Yes'	×'	√'	No'	C'	Unspecified'
Caaapa'	No'	×'	×'	No'	C'	Skin'
Cpp'	Yes'	√'	×'	No'	C'	Muscle'
Capp'	Yes'	√'	×'	No'	C'	Muscle'
Caapp'	Yes'	×'	√'	No'	C'	Unspecified'
Caaapp'	No'	×'	×'	No'	C'	Skin'
Cpaa'	Yes'	√'	×'	No'	C'	Skin'
Capaa'	Yes'	×'	√'	No'	C'	Muscle'
Caapaa'	No'	×'	×'	No'	C'	Neuron'
Cpap'	Yes'	√'	×'	No'	C'	Skin'
Capap'	Yes'	×'	√'	No'	C'	Muscle'
Caapap'	No'	×'	×'	Yes'	C'	Death'
Cppa'	Yes'	√'	×'	No'	C'	Muscle'
Cappa'	Yes'	×'	√'	No'	C'	Muscle'
Caappd'	No'	×'	×'	No'	C'	Skin'
Cppp'	Yes'	√'	×'	No'	C'	Muscle'
Cappp'	Yes'	×'	√'	No'	C'	Muscle'
Caappv'	No'	×'	×'	No'	C'	Neuron'
Cpaaa'	Yes'	×'	√'	No'	C'	Skin'
Capaaa'	Yes'	×'	√'	No'	C'	Muscle'
Cpaap'	Yes'	×'	√'	No'	C'	Skin'
Capaap'	Yes'	×'	√'	No'	C'	Muscle'
Cpapa'	Yes'	×'	√'	No'	C'	Skin'
Capapa'	Yes'	×'	√'	No'	C'	Muscle'
Cpapp'	Yes'	×'	√'	No'	C'	Skin'
Capapp'	Yes'	×'	√'	No'	C'	Muscle'
Cppaa'	Yes'	×'	√'	No'	C'	Muscle'
Cappaa'	Yes'	×'	√'	No'	C'	Muscle'
Cppap'	Yes'	×'	√'	No'	C'	Muscle'
Cappap'	Yes'	×'	√'	No'	C'	Muscle'
Cpppa'	Yes'	×'	√'	No'	C'	Muscle'
Capppa'	Yes'	×'	√'	No'	C'	Muscle'
Cpppp'	Yes'	×'	√'	No'	C'	Muscle'
Capppp'	Yes'	×'	√'	No'	C'	Muscle'
Cpaaaa'	No'	×'	×'	No'	C'	Skin'
Capaaaa'	No'	×'	×'	No'	C'	Muscle'
Cpaaap'	No'	×'	×'	No'	C'	Skin'
Capaaap'	No'	×'	×'	No'	C'	Muscle'
Cpaapa'	No'	×'	×'	No'	C'	Skin'
Capaapa'	No'	×'	×'	No'	C'	Muscle'
Cpaapp'	No'	×'	×'	No'	C'	Skin'
Capaapp'	No'	×'	×'	No'	C'	Muscle'
Cpapaa'	No'	×'	×'	No'	C'	Skin'
Capapaa'	No'	×'	×'	No'	C'	Muscle'
Cpapap'	No'	×'	×'	No'	C'	Skin'
Capapap'	No'	×'	×'	No'	C'	Muscle'
Cpappd'	No'	×'	×'	No'	C'	Skin'
Capappa'	No'	×'	×'	No'	C'	Muscle'
Cpappv'	No'	×'	×'	No'	C'	Skin'
Capappp'	No'	×'	×'	No'	C'	Muscle'
Cppaaa'	Yes'	×'	√'	No'	C'	Muscle'
Cappaaa'	No'	×'	×'	No'	C'	Muscle'
Cppaap'	Yes'	×'	√'	No'	C'	Muscle'
Cappaap'	No'	×'	×'	No'	C'	Muscle'
Cppapa'	Yes'	×'	√'	No'	C'	Muscle'
Cappapa'	No'	×'	×'	No'	C'	Muscle'
Cppapp'	Yes'	×'	√'	No'	C'	Muscle'
Cappapp'	No'	×'	×'	No'	C'	Muscle'
Cpppaa'	Yes'	×'	√'	No'	C'	Muscle'
Capppaa'	No'	×'	×'	No'	C'	Muscle'
Cpppap'	Yes'	×'	√'	No'	C'	Muscle'
Capppap'	No'	×'	×'	No'	C'	Muscle'
Cppppa'	Yes'	×'	√'	No'	C'	Muscle'
Cappppd'	No'	×'	×'	No'	C'	Muscle'
Cppppp'	Yes'	×'	√'	No'	C'	Muscle'
Cappppv'	No'	×'	×'	No'	C'	Muscle'
Cppaaaa'	No'	×'	×'	No'	C'	Muscle'
Cppaaap'	No'	×'	×'	No'	C'	Muscle'
Cppaapa'	No'	×'	×'	No'	C'	Muscle'
Cppaapp'	No'	×'	×'	No'	C'	Muscle'
Cppapaa'	No'	×'	×'	No'	C'	Muscle'
Cppapap'	No'	×'	×'	No'	C'	Muscle'
Cppappa'	No'	×'	×'	No'	C'	Muscle'
Cppappp'	No'	×'	×'	No'	C'	Muscle'
Cpppaaa'	No'	×'	×'	No'	C'	Muscle'
Cpppaap'	No'	×'	×'	No'	C'	Muscle'
Cpppapa'	No'	×'	×'	No'	C'	Muscle'
Cpppapp'	No'	×'	×'	No'	C'	Muscle'
Cppppaa'	No'	×'	×'	No'	C'	Muscle'
Cppppap'	No'	×'	×'	No'	C'	Muscle'
Cpppppd'	No'	×'	×'	No'	C'	Muscle'
Cpppppv'	No'	×'	×'	No'	C'	Muscle'
D'	Yes'	√'	×'	No'	D'	Muscle'
Da'	Yes'	√'	×'	No'	D'	Muscle'
Daa'	Yes'	√'	×'	No'	D'	Muscle'
Daaa'	Yes'	×'	√'	No'	D'	Muscle'
Daaaa'	No'	×'	×'	No'	D'	Muscle'
Dp'	Yes'	√'	×'	No'	D'	Muscle'
Dap'	Yes'	√'	×'	No'	D'	Muscle'
Daap'	Yes'	×'	√'	No'	D'	Muscle'
Daaap'	No'	×'	×'	No'	D'	Muscle'
Dpa'	Yes'	√'	×'	No'	D'	Muscle'
Dapa'	Yes'	×'	√'	No'	D'	Muscle'
Daapa'	No'	×'	×'	No'	D'	Muscle'
Dpp'	Yes'	√'	×'	No'	D'	Muscle'
Dapp'	Yes'	×'	√'	No'	D'	Muscle'
Daapp'	No'	×'	×'	No'	D'	Muscle'
Dpaa'	Yes'	×'	√'	No'	D'	Muscle'
Dapaa'	No'	×'	×'	No'	D'	Muscle'
Dpap'	Yes'	×'	√'	No'	D'	Muscle'
Dapap'	No'	×'	×'	No'	D'	Muscle'
Dppa'	Yes'	×'	√'	No'	D'	Muscle'
Dappa'	No'	×'	×'	No'	D'	Muscle'
Dppp'	Yes'	×'	√'	No'	D'	Muscle'
Dappp'	No'	×'	×'	No'	D'	Muscle'
Dpaaa'	No'	×'	×'	No'	D'	Muscle'
Dpaap'	No'	×'	×'	No'	D'	Muscle'
Dpapa'	No'	×'	×'	No'	D'	Muscle'
Dpapp'	No'	×'	×'	No'	D'	Muscle'
Dppaa'	No'	×'	×'	No'	D'	Muscle'
Dppap'	No'	×'	×'	No'	D'	Muscle'
Dpppa'	No'	×'	×'	No'	D'	Muscle'
Dpppp'	No'	×'	×'	No'	D'	Muscle'
P3'	Yes'	√'	×'	No'	/'	Unspecified'
P4'	Yes'	√'	×'	No'	/'	Germ Cell'
Z2'	No'	×'	×'	No'	/'	Germ Cell'
Z3'	No'	×'	×'	No'	/'	Germ Cell'
EMS'	No'	×'	×'	No'	/'	Unspecified'
P2'	No'	×'	×'	No'	/'	Unspecified'
Note 1: The cell lineages derived from the 5 somatic founder cells (i.e., AB, MS, E, C, and D) are marked with their names, while the germline stem cells (i.e., P0, P1, P2, P3, P4, and Z2/Z3) and the mother cell of MS and E (i.e., EMS) are marked with "/".
Note 2: The cell fate is obtained from X. Ma et al., A 4D single-cell protein atlas of transcription factors delineates spatiotemporal patterning during embryogenesis. Nat. Methods 18, 893-902 (2021). doi: 10.1038/s41592-021-01216-1; pmid: 34312566. The apoptotic fate has been manually checked for all cells one by one according to J.E. Sulston, E. Schierenberg, J.G. White, J.N. Thomson, The embry…

## Sheet: Cell proceeding cytokinesis
Cell identity	Embryo sample	Time point	Cell lineage	Cell fate
AB'	WT_Sample6'	4	AB'	Unspecified'
AB'	WT_Sample6'	5	AB'	Unspecified'
P1'	WT_Sample6'	6	/'	Unspecified'
ABa'	WT_Sample6'	13	AB'	Unspecified'
ABp'	WT_Sample6'	13	AB'	Unspecified'
ABa'	WT_Sample6'	14	AB'	Unspecified'
ABp'	WT_Sample6'	14	AB'	Unspecified'
EMS'	WT_Sample6'	16	/'	Unspecified'
EMS'	WT_Sample6'	17	/'	Unspecified'
P2'	WT_Sample6'	19	/'	Unspecified'
ABal'	WT_Sample6'	23	AB'	Unspecified'
ABar'	WT_Sample6'	23	AB'	Unspecified'
ABpr'	WT_Sample6'	23	AB'	Unspecified'
ABal'	WT_Sample6'	24	AB'	Unspecified'
ABar'	WT_Sample6'	24	AB'	Unspecified'
ABpl'	WT_Sample6'	24	AB'	Unspecified'
ABpr'	WT_Sample6'	24	AB'	Unspecified'
MS'	WT_Sample6'	27	MS'	Unspecified'
E'	WT_Sample6'	28	E'	Intestine'
MS'	WT_Sample6'	28	MS'	Unspecified'
E'	WT_Sample6'	29	E'	Intestine'
C'	WT_Sample6'	31	C'	Unspecified'
C'	WT_Sample6'	32	C'	Unspecified'
ABala'	WT_Sample6'	34	AB'	Unspecified'
ABalp'	WT_Sample6'	34	AB'	Unspecified'
ABarp'	WT_Sample6'	34	AB'	Unspecified'
ABpla'	WT_Sample6'	34	AB'	Unspecified'
ABpra'	WT_Sample6'	34	AB'	Unspecified'
ABalp'	WT_Sample6'	35	AB'	Unspecified'
ABara'	WT_Sample6'	35	AB'	Unspecified'
ABarp'	WT_Sample6'	35	AB'	Unspecified'
ABpla'	WT_Sample6'	35	AB'	Unspecified'
ABplp'	WT_Sample6'	35	AB'	Unspecified'
ABpra'	WT_Sample6'	35	AB'	Unspecified'
ABprp'	WT_Sample6'	35	AB'	Unspecified'
P3'	WT_Sample6'	35	/'	Unspecified'
MSa'	WT_Sample6'	42	MS'	Unspecified'
MSp'	WT_Sample6'	42	MS'	Unspecified'
MSp'	WT_Sample6'	43	MS'	Unspecified'
Ca'	WT_Sample6'	47	C'	Unspecified'
Cp'	WT_Sample6'	47	C'	Unspecified'
Ca'	WT_Sample6'	48	C'	Unspecified'
ABalap'	WT_Sample6'	51	AB'	Unspecified'
ABalpa'	WT_Sample6'	51	AB'	Unspecified'
ABaraa'	WT_Sample6'	51	AB'	Unspecified'
ABplaa'	WT_Sample6'	51	AB'	Unspecified'
ABplap'	WT_Sample6'	51	AB'	Unspecified'
ABprap'	WT_Sample6'	51	AB'	Unspecified'
ABalap'	WT_Sample6'	52	AB'	Unspecified'
ABalpp'	WT_Sample6'	52	AB'	Unspecified'
ABaraa'	WT_Sample6'	52	AB'	Unspecified'
ABarap'	WT_Sample6'	52	AB'	Unspecified'
ABarpa'	WT_Sample6'	52	AB'	Unspecified'
ABplap'	WT_Sample6'	52	AB'	Unspecified'
ABplpa'	WT_Sample6'	52	AB'	Unspecified'
ABplpp'	WT_Sample6'	52	AB'	Unspecified'
ABpraa'	WT_Sample6'	52	AB'	Unspecified'
ABprap'	WT_Sample6'	52	AB'	Unspecified'
ABprpa'	WT_Sample6'	52	AB'	Unspecified'
ABprpp'	WT_Sample6'	52	AB'	Unspecified'
ABarpa'	WT_Sample6'	53	AB'	Unspecified'
ABarpp'	WT_Sample6'	53	AB'	Unspecified'
ABplpp'	WT_Sample6'	53	AB'	Unspecified'
ABpraa'	WT_Sample6'	53	AB'	Unspecified'
ABprpa'	WT_Sample6'	53	AB'	Unspecified'
Ea'	WT_Sample6'	53	E'	Intestine'
ABarpa'	WT_Sample6'	54	AB'	Unspecified'
ABarpp'	WT_Sample6'	54	AB'	Unspecified'
Ea'	WT_Sample6'	54	E'	Intestine'
Ep'	WT_Sample6'	56	E'	Intestine'
D'	WT_Sample6'	57	D'	Muscle'
Ep'	WT_Sample6'	57	E'	Intestine'
Ep'	WT_Sample6'	58	E'	Intestine'
MSaa'	WT_Sample6'	59	MS'	Unspecified'
MSpa'	WT_Sample6'	59	MS'	Unspecified'
MSap'	WT_Sample6'	60	MS'	Unspecified'
MSpa'	WT_Sample6'	60	MS'	Unspecified'
MSpp'	WT_Sample6'	60	MS'	Unspecified'
Cpa'	WT_Sample6'	67	C'	Skin'
Caa'	WT_Sample6'	68	C'	Unspecified'
ABplaaa'	WT_Sample6'	69	AB'	Unspecified'
ABplaap'	WT_Sample6'	69	AB'	Unspecified'
ABplapa'	WT_Sample6'	69	AB'	Unspecified'
Caa'	WT_Sample6'	69	C'	Unspecified'
Cpp'	WT_Sample6'	69	C'	Muscle'
ABalapa'	WT_Sample6'	70	AB'	Unspecified'
ABalapp'	WT_Sample6'	70	AB'	Unspecified'
ABalpap'	WT_Sample6'	70	AB'	Unspecified'
ABalppp'	WT_Sample6'	70	AB'	Unspecified'
ABaraaa'	WT_Sample6'	70	AB'	Unspecified'
ABarpaa'	WT_Sample6'	70	AB'	Unspecified'
ABarpap'	WT_Sample6'	70	AB'	Unspecified'
ABplaaa'	WT_Sample6'	70	AB'	Unspecified'
ABplapa'	WT_Sample6'	70	AB'	Unspecified'
ABplapp'	WT_Sample6'	70	AB'	Unspecified'
ABprapa'	WT_Sample6'	70	AB'	Unspecified'
ABprapp'	WT_Sample6'	70	AB'	Unspecified'
ABprpap'	WT_Sample6'	70	AB'	Unspecified'
Cpp'	WT_Sample6'	70	C'	Muscle'
ABalaaa'	WT_Sample6'	71	AB'	Unspecified'
ABalaap'	WT_Sample6'	71	AB'	Unspecified'
ABalapp'	WT_Sample6'	71	AB'	Unspecified'
ABalpaa'	WT_Sample6'	71	AB'	Unspecified'
ABalppa'	WT_Sample6'	71	AB'	Unspecified'
ABalppp'	WT_Sample6'	71	AB'	Unspecified'
ABaraaa'	WT_Sample6'	71	AB'	Unspecified'
ABarapa'	WT_Sample6'	71	AB'	Unspecified'
ABarapp'	WT_Sample6'	71	AB'	Unspecified'
ABarpaa'	WT_Sample6'	71	AB'	Unspecified'
ABarpap'	WT_Sample6'	71	AB'	Unspecified'
ABplapp'	WT_Sample6'	71	AB'	Unspecified'
ABplpaa'	WT_Sample6'	71	AB'	Unspecified'
ABplpap'	WT_Sample6'	71	AB'	Unspecified'
ABpraaa'	WT_Sample6'	71	AB'	Unspecified'
ABpraap'	WT_Sample6'	71	AB'	Unspecified'
ABprapp'	WT_Sample6'	71	AB'	Unspecified'
ABprpaa'	WT_Sample6'	71	AB'	Unspecified'
ABprppa'	WT_Sample6'	71	AB'	Unspecified'
ABprppp'	WT_Sample6'	71	AB'	Unspecified'
Cap'	WT_Sample6'	71	C'	Muscle'
ABalaap'	WT_Sample6'	72	AB'	Unspecified'
ABarppa'	WT_Sample6'	72	AB'	Unspecified'
ABarppp'	WT_Sample6'	72	AB'	Unspecified'
ABplpap'	WT_Sample6'	72	AB'	Unspecified'
ABplppa'	WT_Sample6'	72	AB'	Unspecified'
ABplppp'	WT_Sample6'	72	AB'	Unspecified'
ABprpaa'	WT_Sample6'	72	AB'	Unspecified'
ABprppa'	WT_Sample6'	72	AB'	Unspecified'
MSaaa'	WT_Sample6'	77	MS'	Unspecified'
MSaaa'	WT_Sample6'	78	MS'	Unspecified'
MSaap'	WT_Sample6'	78	MS'	Unspecified'
MSaap'	WT_Sample6'	79	MS'	Unspecified'
MSpap'	WT_Sample6'	79	MS'	Unspecified'
P4'	WT_Sample6'	79	/'	Germ Cell'
Ear'	WT_Sample6'	80	E'	Intestine'
MSapa'	WT_Sample6'	80	MS'	Unspecified'
MSapp'	WT_Sample6'	80	MS'	Unspecified'
MSpaa'	WT_Sample6'	80	MS'	Unspecified'
MSpap'	WT_Sample6'	80	MS'	Unspecified'
MSppa'	WT_Sample6'	80	MS'	Unspecified'
P4'	WT_Sample6'	80	/'	Germ Cell'
Eal'	WT_Sample6'	81	E'	Intestine'
MSapa'	WT_Sample6'	81	MS'	Unspecified'
MSpaa'	WT_Sample6'	81	MS'	Unspecified'
MSpap'	WT_Sample6'	81	MS'	Unspecified'
MSppa'	WT_Sample6'	81	MS'	Unspecified'
MSppp'	WT_Sample6'	81	MS'	Unspecified'
P4'	WT_Sample6'	81	/'	Germ Cell'
Eal'	WT_Sample6'	82	E'	Intestine'
MSppa'	WT_Sample6'	82	MS'	Unspecified'
Epr'	WT_Sample6'	86	E'	Intestine'
Da'	WT_Sample6'	87	D'	Muscle'
Dp'	WT_Sample6'	87	D'	Muscle'
Epl'	WT_Sample6'	87	E'	Intestine'
Epr'	WT_Sample6'	87	E'	Intestine'
Dp'	WT_Sample6'	88	D'	Muscle'
Cpaa'	WT_Sample6'	90	C'	Skin'
ABplaapp'	WT_Sample6'	91	AB'	Skin'
ABplapap'	WT_Sample6'	91	AB'	Unspecified'
Cpaa'	WT_Sample6'	91	C'	Skin'
ABalapap'	WT_Sample6'	92	AB'	Unspecified'
ABalappp'	WT_Sample6'	92	AB'	Unspecified'
ABalpapp'	WT_Sample6'	92	AB'	Unspecified'
ABalpppp'	WT_Sample6'	92	AB'	Unspecified'
ABarapap'	WT_Sample6'	92	AB'	Unspecified'
ABplaaaa'	WT_Sample6'	92	AB'	Unspecified'
ABplaapp'	WT_Sample6'	92	AB'	Skin'
ABplapap'	WT_Sample6'	92	AB'	Unspecified'
Cpap'	WT_Sample6'	92	C'	Skin'
ABalapaa'	WT_Sample6'	93	AB'	Unspecified'
ABalapap'	WT_Sample6'	93	AB'	Unspecified'
ABalpaap'	WT_Sample6'	93	AB'	Unspecified'
ABaraapp'	WT_Sample6'	93	AB'	Unspecified'
ABplaaap'	WT_Sample6'	93	AB'	Skin'
ABplaapa'	WT_Sample6'	93	AB'	Unspecified'
ABplapaa'	WT_Sample6'	93	AB'	Unspecified'
ABpraapp'	WT_Sample6'	93	AB'	Skin'
ABprapap'	WT_Sample6'	93	AB'	Unspecified'
ABprpppa'	WT_Sample6'	93	AB'	Unspecified'
ABprpppp'	WT_Sample6'	93	AB'	Unspecified'
Caaa'	WT_Sample6'	93	C'	Skin'
ABarappp'	WT_Sample6'	94	AB'	Unspecified'
ABarpaap'	WT_Sample6'	94	AB'	Skin'
ABarpapa'	WT_Sample6'	94	AB'	Unspecified'
ABplaaap'	WT_Sample6'	94	AB'	Skin'
ABplappa'	WT_Sample6'	94	AB'	Skin'
ABplpaaa'	WT_Sample6'	94	AB'	Unspecified'
ABplpaap'	WT_Sample6'	94	AB'	Unspecified'
ABplpapp'	WT_Sample6'	94	AB'	Unspecified'
ABpraaap'	WT_Sample6'	94	AB'	Unspecified'
ABprapaa'	WT_Sample6'	94	AB'	Unspecified'
ABprpaaa'	WT_Sample6'	94	AB'	Unspecified'
ABprpaap'	WT_Sample6'	94	AB'	Unspecified'
ABprpapp'	WT_Sample6'	94	AB'	Unspecified'
ABprpppa'	WT_Sample6'	94	AB'	Unspecified'
ABalappa'	WT_Sample6'	95	AB'	Unspecified'
ABalppap'	WT_Sample6'	95	AB'	Unspecified'
ABalpppa'	WT_Sample6'	95	AB'	Unspecified'
ABaraapa'	WT_Sample6'	95	AB'	Unspecified'
ABarapaa'	WT_Sample6'	95	AB'	Unspecified'
ABarappa'	WT_Sample6'	95	AB'	Unspecified'
ABarappp'	WT_Sample6'	95	AB'	Unspecified'
ABarpapa'	WT_Sample6'	95	AB'	Unspecified'
ABplpapa'	WT_Sample6'	95	AB'	Unspecified'
ABplpppp'	WT_Sample6'	95	AB'	Unspecified'
ABpraapa'	WT_Sample6'	95	AB'	Unspecified'
ABprpaaa'	WT_Sample6'	95	AB'	Unspecified'
ABalaapp'	WT_Sample6'	96	AB'	Unspecified'
ABalppap'	WT_Sample6'	96	AB'	Unspecified'
ABaraaaa'	WT_Sample6'	96	AB'	Unspecified'
ABarpapp'	WT_Sample6'	96	AB'	Skin'
ABplppap'	WT_Sample6'	96	AB'	Neuron'
ABpraaaa'	WT_Sample6'	96	AB'	Unspecified'
Cppp'	WT_Sample6'	96	C'	Muscle'
ABalaapp'	WT_Sample6'	97	AB'	Unspecified'
ABalpaaa'	WT_Sample6'	97	AB'	Unspecified'
ABarpaaa'	WT_Sample6'	97	AB'	Unspecified'
ABplappp'	WT_Sample6'	97	AB'	Unspecified'
ABprappp'	WT_Sample6'	97	AB'	Unspecified'
ABprppaa'	WT_Sample6'	97	AB'	Unspecified'
ABprppap'	WT_Sample6'	97	AB'	Neuron'
Cppp'	WT_Sample6'	97	C'	Muscle'
ABalaaaa'	WT_Sample6'	98	AB'	Unspecified'
ABarpppa'	WT_Sample6'	98	AB'	Unspecified'
Caap'	WT_Sample6'	98	C'	Unspecified'
MSaaaa'	WT_Sample6'	98	MS'	Unspecified'
ABarppap'	WT_Sample6'	99	AB'	Skin'
ABarpppp'	WT_Sample6'	99	AB'	Skin'
ABplppaa'	WT_Sample6'	99	AB'	Unspecified'
ABprappa'	WT_Sample6'	99	AB'	Skin'
ABalaapa'	WT_Sample6'	100	AB'	Unspecified'
ABalppaa'	WT_Sample6'	100	AB'	Unspecified'
ABarppaa'	WT_Sample6'	100	AB'	Unspecified'
ABarppap'	WT_Sample6'	100	AB'	Skin'
MSaaap'	WT_Sample6'	100	MS'	Unspecified'
MSaapa'	WT_Sample6'	100	MS'	Unspecified'
ABalaapa'	WT_Sample6'	101	AB'	Unspecified'
MSaaap'	WT_Sample6'	101	MS'	Unspecified'
MSaapa'	WT_Sample6'	101	MS'	Unspecified'
MSpapa'	WT_Sample6'	101	MS'	Unspecified'
Capp'	WT_Sample6'	102	C'	Muscle'
MSpaaa'	WT_Sample6'	102	MS'	Unspecified'
MSpapa'	WT_Sample6'	102	MS'	Unspecified'
Cppa'	WT_Sample6'	104	C'	Muscle'
MSaapp'	WT_Sample6'	104	MS'	Unspecified'
MSpaap'	WT_Sample6'	104	MS'	Unspecified'
MSaapp'	WT_Sample6'	105	MS'	Unspecified'
MSapaa'	WT_Sample6'	105	MS'	Unspecified'
MSapap'	WT_Sample6'	105	MS'	Unspecified'
MSpaap'	WT_Sample6'	105	MS'	Unspecified'
MSppaa'	WT_Sample6'	105	MS'	Unspecified'
MSppap'	WT_Sample6'	105	MS'	Unspecified'
Capa'	WT_Sample6'	107	C'	Muscle'
MSpapp'	WT_Sample6'	107	MS'	Muscle'
MSappa'	WT_Sample6'	108	MS'	Unspecified'
MSpapp'	WT_Sample6'	108	MS'	Muscle'
MSpppa'	WT_Sample6'	108	MS'	Unspecified'
MSappa'	WT_Sample6'	109	MS'	Unspecified'
MSappp'	WT_Sample6'	109	MS'	Muscle'
MSpppp'	WT_Sample6'	112	MS'	Muscle'
Dap'	WT_Sample6'	116	D'	Muscle'
Dap'	WT_Sample6'	117	D'	Muscle'
ABalppppp'	WT_Sample6'	118	AB'	Unspecified'
Daa'	WT_Sample6'	118	D'	Muscle'
Dap'	WT_Sample6'	118	D'	Muscle'
Dpp'	WT_Sample6'	118	D'	Muscle'
Daa'	WT_Sample6'	119	D'	Muscle'
Dap'	WT_Sample6'	119	D'	Muscle'
Dpa'	WT_Sample6'	119	D'	Muscle'
ABalpaapa'	WT_Sample6'	120	AB'	Unspecified'
ABalpappa'	WT_Sample6'	120	AB'	Unspecified'
ABarapapp'	WT_Sample6'	120	AB'	Unspecified'
ABplapapp'	WT_Sample6'	120	AB'	Unspecified'
ABpraaapp'	WT_Sample6'	120	AB'	Unspecified'
Dpa'	WT_Sample6'	120	D'	Muscle'
ABalpappp'	WT_Sample6'	121	AB'	Unspecified'
Dpa'	WT_Sample6'	121	D'	Muscle'
ABalapapp'	WT_Sample6'	122	AB'	Unspecified'
ABalapppa'	WT_Sample6'	122	AB'	Unspecified'
ABalapppp'	WT_Sample6'	122	AB'	Unspecified'
ABaraappp'	WT_Sample6'	122	AB'	Unspecified'
ABarapapa'	WT_Sample6'	122	AB'	Unspecified'
ABplaappp'	WT_Sample6'	122	AB'	Skin'
ABplapapa'	WT_Sample6'	122	AB'	Unspecified'
ABplpappa'	WT_Sample6'	122	AB'	Unspecified'
Cpaap'	WT_Sample6'	122	C'	Skin'
Dpa'	WT_Sample6'	122	D'	Muscle'
ABalppppa'	WT_Sample6'	123	AB'	Unspecified'
ABarapapa'	WT_Sample6'	123	AB'	Unspecified'
ABplaaapp'	WT_Sample6'	123	AB'	Skin'
ABplpaaap'	WT_Sample6'	123	AB'	Unspecified'
ABprpappa'	WT_Sample6'	123	AB'	Neuron'
ABprppppa'	WT_Sample6'	123	AB'	Unspecified'
Dpa'	WT_Sample6'	123	D'	Muscle'
Eala'	WT_Sample6'	123	E'	Intestine'
ABalaaapp'	WT_Sample6'	124	AB'	Unspecified'
ABalppapp'	WT_Sample6'	124	AB'	Unspecified'
ABaraappa'	WT_Sample6'	124	AB'	Pharynx'
ABarapppa'	WT_Sample6'	124	AB'	Neuron'
ABarapppp'	WT_Sample6'	124	AB'	Unspecified'
ABarpaapa'	WT_Sample6'	124	AB'	Skin'
ABarpaapp'	WT_Sample6'	124	AB'	Skin'
ABplapaaa'	WT_Sample6'	124	AB'	Unspecified'
ABplppppa'	WT_Sample6'	124	AB'	Unspecified'
ABpraaapa'	WT_Sample6'	124	AB'	Unspecified'
ABpraappp'	WT_Sample6'	124	AB'	Skin'
ABprapapp'	WT_Sample6'	124	AB'	Unspecified'
ABprpaaaa'	WT_Sample6'	124	AB'	Unspecified'
ABprpaaap'	WT_Sample6'	124	AB'	Unspecified'
ABprpaapp'	WT_Sample6'	124	AB'	Unspecified'
ABprppppa'	WT_Sample6'	124	AB'	Unspecified'
Cpaaa'	WT_Sample6'	124	C'	Skin'
Dpa'	WT_Sample6'	124	D'	Muscle'
Eala'	WT_Sample6'	124	E'	Intestine'
ABalappap'	WT_Sample6'	125	AB'	Unspecified'
ABalppapa'	WT_Sample6'	125	AB'	Neuron'
ABalpppap'	WT_Sample6'	125	AB'	Unspecified'
ABaraapaa'	WT_Sample6'	125	AB'	Pharynx'
ABarappap'	WT_Sample6'	125	AB'	Unspecified'
ABplaaaaa'	WT_Sample6'	125	AB'	Unspecified'
ABplaaaap'	WT_Sample6'	125	AB'	Skin'
ABplaapap'	WT_Sample6'	125	AB'	Unspecified'
ABplappaa'	WT_Sample6'	125	AB'	Skin'
ABplappap'	WT_Sample6'	125	AB'	Skin'
ABplppppa'	WT_Sample6'	125	AB'	Unspecified'
ABpraapap'	WT_Sample6'	125	AB'	Unspecified'
ABprpappp'	WT_Sample6'	125	AB'	Unspecified'
Dpa'	WT_Sample6'	125	D'	Muscle'
Eala'	WT_Sample6'	125	E'	Intestine'
Ealp'	WT_Sample6'	125	E'	Intestine'
MSaaaaa'	WT_Sample6'	125	MS'	Unspecified'
ABalaaapa'	WT_Sample6'	126	AB'	Unspecified'
ABalapaaa'	WT_Sample6'	126	AB'	Unspecified'
ABalapapa'	WT_Sample6'	126	AB'	Unspecified'
ABalpapaa'	WT_Sample6'	126	AB'	Unspecified'
ABalpapap'	WT_Sample6'	126	AB'	Unspecified'
ABaraapap'	WT_Sample6'	126	AB'	Unspecified'
ABarapaaa'	WT_Sample6'	126	AB'	Unspecified'
ABarpapaa'	WT_Sample6'	126	AB'	Unspecified'
ABplapaap'	WT_Sample6'	126	AB'	Unspecified'
ABplpppaa'	WT_Sample6'	126	AB'	Neuron'
ABplppppa'	WT_Sample6'	126	AB'	Unspecified'
ABplppppp'	WT_Sample6'	126	AB'	Unspecified'
ABpraaaap'	WT_Sample6'	126	AB'	Unspecified'
ABprapaaa'	WT_Sample6'	126	AB'	Unspecified'
ABprapapa'	WT_Sample6'	126	AB'	Unspecified'
ABprpapaa'	WT_Sample6'	126	AB'	Neuron'
ABprpappp'	WT_Sample6'	126	AB'	Unspecified'
ABprpppaa'	WT_Sample6'	126	AB'	Unspecified'
ABprpppap'	WT_Sample6'	126	AB'	Unspecified'
Caaaa'	WT_Sample6'	126	C'	Skin'
Cpapp'	WT_Sample6'	126	C'	Skin'
MSaaapa'	WT_Sample6'	126	MS'	Pharynx'
ABalpapap'	WT_Sample6'	127	AB'	Unspecified'
ABarappaa'	WT_Sample6'	127	AB'	Unspecified'
ABarpapaa'	WT_Sample6'	127	AB'	Unspecified'
ABplpaapa'	WT_Sample6'	127	AB'	Unspecified'
ABplpapap'	WT_Sample6'	127	AB'	Unspecified'
ABplppapa'	WT_Sample6'	127	AB'	Neuron'
ABplppppp'	WT_Sample6'	127	AB'	Unspecified'
ABpraappa'	WT_Sample6'	127	AB'	Skin'
ABprapaap'	WT_Sample6'	127	AB'	Unspecified'
ABprppapa'	WT_Sample6'	127	AB'	Neuron'
ABprpppaa'	WT_Sample6'	127	AB'	Unspecified'
ABprppppp'	WT_Sample6'	127	AB'	Unspecified'
Eara'	WT_Sample6'	127	E'	Intestine'
MSaaaap'	WT_Sample6'	127	MS'	Unspecified'
MSaaapa'	WT_Sample6'	127	MS'	Pharynx'
MSpaaaa'	WT_Sample6'	127	MS'	Unspecified'
ABalaaaal'	WT_Sample6'	128	AB'	Unspecified'
ABarpaaaa'	WT_Sample6'	128	AB'	Neuron'
ABplaaapa'	WT_Sample6'	128	AB'	Skin'
ABplpapaa'	WT_Sample6'	128	AB'	Neuron'
ABplppapa'	WT_Sample6'	128	AB'	Neuron'
ABplppppp'	WT_Sample6'	128	AB'	Unspecified'
ABprppppp'	WT_Sample6'	128	AB'	Unspecified'
Earp'	WT_Sample6'	128	E'	Intestine'
MSaaaap'	WT_Sample6'	128	MS'	Unspecified'
MSpapaa'	WT_Sample6'	128	MS'	Unspecified'
ABalaaaar'	WT_Sample6'	129	AB'	Unspecified'
ABalpaaap'	WT_Sample6'	129	AB'	Unspecified'
ABalpppaa'	WT_Sample6'	129	AB'	Unspecified'
ABarpaaap'	WT_Sample6'	129	AB'	Unspecified'
ABarpapap'	WT_Sample6'	129	AB'	Skin'
ABplpappp'	WT_Sample6'	129	AB'	Unspecified'
ABprppapp'	WT_Sample6'	129	AB'	Neuron'
Cpapa'	WT_Sample6'	129	C'	Skin'
Earp'	WT_Sample6'	129	E'	Intestine'
MSpaaap'	WT_Sample6'	129	MS'	Pharynx'
MSpapaa'	WT_Sample6'	129	MS'	Unspecified'
ABalappaa'	WT_Sample6'	130	AB'	Unspecified'
ABalpaaaa'	WT_Sample6'	130	AB'	Unspecified'
ABarpapap'	WT_Sample6'	130	AB'	Skin'
ABarpappp'	WT_Sample6'	130	AB'	Skin'
ABarpppap'	WT_Sample6'	130	AB'	Unspecified'
ABplapppa'	WT_Sample6'	130	AB'	Unspecified'
ABplapppp'	WT_Sample6'	130	AB'	Skin'
ABplppaap'	WT_Sample6'	130	AB'	Unspecified'
ABprppaap'	WT_Sample6'	130	AB'	Unspecified'
Caapp'	WT_Sample6'	130	C'	Unspecified'
Epra'	WT_Sample6'	130	E'	Intestine'
ABaraaaap'	WT_Sample6'	131	AB'	Unspecified'
ABarpappa'	WT_Sample6'	131	AB'	Skin'
ABprappaa'	WT_Sample6'	131	AB'	Skin'
ABprppaaa'	WT_Sample6'	131	AB'	Unspecified'
Cpppa'	WT_Sample6'	131	C'	Muscle'
Epra'	WT_Sample6'	131	E'	Intestine'
MSaapap'	WT_Sample6'	131	MS'	Unspecified'
ABarpppaa'	WT_Sample6'	132	AB'	Unspecified'
ABplppaaa'	WT_Sample6'	132	AB'	Unspecified'
ABprappaa'	WT_Sample6'	132	AB'	Skin'
ABprapppa'	WT_Sample6'	132	AB'	Unspecified'
Cpppp'	WT_Sample6'	132	C'	Muscle'
Epla'	WT_Sample6'	132	E'	Intestine'
Eplp'	WT_Sample6'	132	E'	Intestine'
Epra'	WT_Sample6'	132	E'	Intestine'
MSpapap'	WT_Sample6'	132	MS'	Unspecified'
ABalppaap'	WT_Sample6'	133	AB'	Unspecified'
ABarppaap'	WT_Sample6'	133	AB'	Unspecified'
ABprappap'	WT_Sample6'	133	AB'	Skin'
ABprapppa'	WT_Sample6'	133	AB'	Unspecified'
ABprapppp'	WT_Sample6'	133	AB'	Skin'
Cpppp'	WT_Sample6'	133	C'	Muscle'
Eplp'	WT_Sample6'	133	E'	Intestine'
ABalaapap'	WT_Sample6'	134	AB'	Unspecified'
ABarppapp'	WT_Sample6'	134	AB'	Skin'
Cpppp'	WT_Sample6'	134	C'	Muscle'
MSppaaa'	WT_Sample6'	134	MS'	Unspecified'
ABarppapa'	WT_Sample6'	135	AB'	Skin'
ABarppppa'	WT_Sample6'	135	AB'	Skin'
ABarppppp'	WT_Sample6'	135	AB'	Skin'
ABarppaaa'	WT_Sample6'	136	AB'	Unspecified'
ABarppppp'	WT_Sample6'	136	AB'	Skin'
Eprp'	WT_Sample6'	136	E'	Intestine'
MSppapa'	WT_Sample6'	136	MS'	Unspecified'
Eprp'	WT_Sample6'	137	E'	Intestine'
Cappa'	WT_Sample6'	138	C'	Muscle'
Cappp'	WT_Sample6'	139	C'	Muscle'
Cppaa'	WT_Sample6'	140	C'	Muscle'
MSaaapp'	WT_Sample6'	140	MS'	Unspecified'
Capap'	WT_Sample6'	141	C'	Muscle'
Capap'	WT_Sample6'	142	C'	Muscle'
Cppap'	WT_Sample6'	142	C'	Muscle'
Capaa'	WT_Sample6'	143	C'	Muscle'
MSapapp'	WT_Sample6'	143	MS'	Muscle'
MSapppa'	WT_Sample6'	143	MS'	Muscle'
MSapppa'	WT_Sample6'	144	MS'	Muscle'
MSapppa'	WT_Sample6'	145	MS'	Muscle'
MSpppaa'	WT_Sample6'	145	MS'	Unspecified'
MSapppp'	WT_Sample6'	146	MS'	Muscle'
MSppaap'	WT_Sample6'	146	MS'	Unspecified'
MSapaap'	WT_Sample6'	149	MS'	Unspecified'
MSappaa'	WT_Sample6'	149	MS'	Other'
MSpappp'	WT_Sample6'	149	MS'	Muscle'
MSpppap'	WT_Sample6'	149	MS'	Unspecified'
ABalpppppp'	WT_Sample6'	150	AB'	Unspecified'
MSppppa'	WT_Sample6'	150	MS'	Muscle'
ABalpaapap'	WT_Sample6'	151	AB'	Pharynx'
Dapp'	WT_Sample6'	151	D'	Muscle'
MSaappa'	WT_Sample6'	151	MS'	Other'
Dapp'	WT_Sample6'	152	D'	Muscle'
MSaappp'	WT_Sample6'	152	MS'	Muscle'
ABalpapppp'	WT_Sample6'	153	AB'	Pharynx'
ABarapappp'	WT_Sample6'	153	AB'	Pharynx'
ABpraaappp'	WT_Sample6'	153	AB'	Unspecified'
Dapp'	WT_Sample6'	153	D'	Muscle'
Dppp'	WT_Sample6'	153	D'	Muscle'
MSppppp'	WT_Sample6'	153	MS'	Muscle'
Dapa'	WT_Sample6'	154	D'	Muscle'
Dapp'	WT_Sample6'	154	D'	Muscle'
Dppa'	WT_Sample6'	154	D'	Muscle'
Dapp'	WT_Sample6'	155	D'	Muscle'
Dppa'	WT_Sample6'	155	D'	Muscle'
MSappap'	WT_Sample6'	155	MS'	Unspecified'
ABalpappap'	WT_Sample6'	156	AB'	Pharynx'
Daaa'	WT_Sample6'	156	D'	Muscle'
Daap'	WT_Sample6'	156	D'	Muscle'
Dapp'	WT_Sample6'	156	D'	Muscle'
Dppa'	WT_Sample6'	156	D'	Muscle'
MSaaaaap'	WT_Sample6'	156	MS'	Pharynx'
Daaa'	WT_Sample6'	157	D'	Muscle'
Dapp'	WT_Sample6'	157	D'	Muscle'
ABalappppa'	WT_Sample6'	158	AB'	Unspecified'
Dpaa'	WT_Sample6'	158	D'	Muscle'
MSpappa'	WT_Sample6'	158	MS'	Muscle'
ABprpppapa'	WT_Sample6'	159	AB'	Unspecified'
MSpappa'	WT_Sample6'	159	MS'	Muscle'
ABplpppapa'	WT_Sample6'	160	AB'	Unspecified'
Dpap'	WT_Sample6'	160	D'	Muscle'
MSaaapaa'	WT_Sample6'	160	MS'	Pharynx'
ABalpaapaa'	WT_Sample6'	161	AB'	Unspecified'
ABaraapapa'	WT_Sample6'	161	AB'	Unspecified'
ABarpapaap'	WT_Sample6'	162	AB'	Unspecified'
MSpaaaap'	WT_Sample6'	162	MS'	Pharynx'
ABalpppppa'	WT_Sample6'	163	AB'	Neuron'
ABaraaapaa'	WT_Sample6'	163	AB'	Unspecified'
MSaaapap'	WT_Sample6'	163	MS'	Pharynx'
MSpaaapp'	WT_Sample6'	163	MS'	Pharynx'
MSpapaap'	WT_Sample6'	163	MS'	Unspecified'
ABaraappap'	WT_Sample6'	164	AB'	Pharynx'
ABarapapap'	WT_Sample6'	164	AB'	Unspecified'
ABplaaaaap'	WT_Sample6'	164	AB'	Unspecified'
ABplpaappp'	WT_Sample6'	164	AB'	Unspecified'
ABpraapapp'	WT_Sample6'	164	AB'	Unspecified'
ABprpappaa'	WT_Sample6'	164	AB'	Neuron'
ABprpappap'	WT_Sample6'	164	AB'	Neuron'
ABprppppap'	WT_Sample6'	164	AB'	Unspecified'
MSaapaap'	WT_Sample6'	164	MS'	Unspecified'
ABalappppp'	WT_Sample6'	165	AB'	Neuron'
ABplaapapp'	WT_Sample6'	165	AB'	Unspecified'
ABplpaaapp'	WT_Sample6'	165	AB'	Unspecified'
MSaaaapa'	WT_Sample6'	165	MS'	Pharynx'
ABalaapppp'	WT_Sample6'	166	AB'	Unspecified'
ABalapappp'	WT_Sample6'	166	AB'	Neuron'
ABalpppapp'	WT_Sample6'	166	AB'	Unspecified'
ABarappppp'	WT_Sample6'	166	AB'	Unspecified'
ABplaapaap'	WT_Sample6'	166	AB'	Neuron'
ABplpaaaap'	WT_Sample6'	166	AB'	Unspecified'
ABpraaaapp'	WT_Sample6'	166	AB'	Unspecified'
ABalapppaa'	WT_Sample6'	167	AB'	Neuron'
ABaraaappp'	WT_Sample6'	167	AB'	Skin'
ABarappapa'	WT_Sample6'	167	AB'	Unspecified'
ABplpppppp'	WT_Sample6'	167	AB'	Unspecified'
ABprpapapa'	WT_Sample6'	167	AB'	Unspecified'
MSpapaaa'	WT_Sample6'	167	MS'	Pharynx'
ABalaaappr'	WT_Sample6'	168	AB'	Neuron'
ABalpapaaa'	WT_Sample6'	168	AB'	Unspecified'
ABalppappp'	WT_Sample6'	168	AB'	Unspecified'
ABaraaappp'	WT_Sample6'	168	AB'	Skin'
ABplpaappa'	WT_Sample6'	168	AB'	Neuron'
ABpraaappa'	WT_Sample6'	168	AB'	Neuron'
ABprpaaaap'	WT_Sample6'	168	AB'	Unspecified'
ABprpapapp'	WT_Sample6'	168	AB'	Neuron'
ABprppaaaa'	WT_Sample6'	168	AB'	Unspecified'
ABprpppppp'	WT_Sample6'	168	AB'	Unspecified'
MSpaapap'	WT_Sample6'	168	MS'	Unspecified'
ABaraapaaa'	WT_Sample6'	169	AB'	Pharynx'
ABarapapaa'	WT_Sample6'	169	AB'	Unspecified'
ABplapaaap'	WT_Sample6'	169	AB'	Neuron'
ABplppppaa'	WT_Sample6'	169	AB'	Unspecified'
ABplppppap'	WT_Sample6'	169	AB'	Other'
ABprpaappp'	WT_Sample6'	169	AB'	Unspecified'
MSaapaaa'	WT_Sample6'	169	MS'	Pharynx'
ABalaaapal'	WT_Sample6'	170	AB'	Neuron'
ABalapaaap'	WT_Sample6'	170	AB'	Neuron'
ABalpaappp'	WT_Sample6'	170	AB'	Skin'
ABaraapaaa'	WT_Sample6'	170	AB'	Pharynx'
ABarapaaap'	WT_Sample6'	170	AB'	Unspecified'
ABplpapapp'	WT_Sample6'	170	AB'	Neuron'
ABplppppap'	WT_Sample6'	170	AB'	Other'
ABprpaapaa'	WT_Sample6'	170	AB'	Neuron'
ABprpaappa'	WT_Sample6'	170	AB'	Neuron'
ABprppppaa'	WT_Sample6'	170	AB'	Unspecified'
ABaraapaaa'	WT_Sample6'	171	AB'	Pharynx'
ABarapaaaa'	WT_Sample6'	171	AB'	Pharynx'
ABarapppaa'	WT_Sample6'	171	AB'	Neuron'
ABarappppa'	WT_Sample6'	171	AB'	Neuron'
ABplapappp'	WT_Sample6'	171	AB'	Unspecified'
ABplppaaaa'	WT_Sample6'	171	AB'	Unspecified'
ABprapaaap'	WT_Sample6'	171	AB'	Neuron'
ABprpaaaaa'	WT_Sample6'	171	AB'	Neuron'
ABprppapaa'	WT_Sample6'	171	AB'	Neuron'
ABalpppapa'	WT_Sample6'	172	AB'	Neuron'
ABarappapp'	WT_Sample6'	172	AB'	Neuron'
ABplpaapaa'	WT_Sample6'	172	AB'	Neuron'
ABplpapapa'	WT_Sample6'	172	AB'	Unspecified'
ABplpppaap'	WT_Sample6'	172	AB'	Neuron'
ABprpapaaa'	WT_Sample6'	172	AB'	Neuron'
Cpppaa'	WT_Sample6'	172	C'	Muscle'
MSaaaapp'	WT_Sample6'	172	MS'	Unspecified'
MSpapapp'	WT_Sample6'	172	MS'	Unspecified'
ABalppappa'	WT_Sample6'	173	AB'	Neuron'
ABplapaaaa'	WT_Sample6'	173	AB'	Unspecified'
ABplapppap'	WT_Sample6'	173	AB'	Unspecified'
ABplpppaaa'	WT_Sample6'	173	AB'	Neuron'
ABplpppaap'	WT_Sample6'	173	AB'	Neuron'
ABprapaaaa'	WT_Sample6'	173	AB'	Unspecified'
ABprpapaap'	WT_Sample6'	173	AB'	Neuron'
ABalppapap'	WT_Sample6'	174	AB'	Neuron'
ABpraaapaa'	WT_Sample6'	174	AB'	Unspecified'
ABalpapapp'	WT_Sample6'	175	AB'	Unspecified'
ABarapppap'	WT_Sample6'	175	AB'	Neuron'
ABplpaapap'	WT_Sample6'	175	AB'	Unspecified'
ABplpapppa'	WT_Sample6'	175	AB'	Other'
ABplpapppp'	WT_Sample6'	175	AB'	Unspecified'
ABpraapapa'	WT_Sample6'	175	AB'	Neuron'
ABprpaapap'	WT_Sample6'	175	AB'	Unspecified'
ABaraaaaaa'	WT_Sample6'	176	AB'	Pharynx'
ABplpapaap'	WT_Sample6'	176	AB'	Neuron'
ABprpppaap'	WT_Sample6'	176	AB'	Neuron'
MSpaaapa'	WT_Sample6'	176	MS'	Pharynx'
ABalaaaarl'	WT_Sample6'	177	AB'	Unspecified'
ABalaapapp'	WT_Sample6'	177	AB'	Unspecified'
ABaraapapp'	WT_Sample6'	177	AB'	Pharynx'
ABpraaaaaa'	WT_Sample6'	177	AB'	Neuron'
ABprapppap'	WT_Sample6'	177	AB'	Unspecified'
ABalaaaarr'	WT_Sample6'	178	AB'	Unspecified'
ABalaaappl'	WT_Sample6'	178	AB'	Unspecified'
ABalpaaaaa'	WT_Sample6'	178	AB'	Pharynx'
ABaraaaaap'	WT_Sample6'	178	AB'	Pharynx'
ABarappaaa'	WT_Sample6'	178	AB'	Unspecified'
ABarpapaaa'	WT_Sample6'	178	AB'	Unspecified'
ABplppaapp'	WT_Sample6'	178	AB'	Neuron'
ABplppappa'	WT_Sample6'	178	AB'	Neuron'
ABprpppppa'	WT_Sample6'	178	AB'	Unspecified'
Caapa'	WT_Sample6'	178	C'	Unspecified'
ABalpaaaap'	WT_Sample6'	179	AB'	Unspecified'
ABalpaaapa'	WT_Sample6'	179	AB'	Unspecified'
ABaraaappa'	WT_Sample6'	179	AB'	Skin'
ABprapappp'	WT_Sample6'	179	AB'	Unspecified'
ABprpppppa'	WT_Sample6'	179	AB'	Unspecified'
Caapa'	WT_Sample6'	179	C'	Unspecified'
Cpppap'	WT_Sample6'	179	C'	Muscle'
Cppppa'	WT_Sample6'	179	C'	Muscle'
MSpaapaa'	WT_Sample6'	179	MS'	Unspecified'
ABalpaaapp'	WT_Sample6'	180	AB'	Unspecified'
ABalpppaaa'	WT_Sample6'	180	AB'	Neuron'
ABarappaap'	WT_Sample6'	180	AB'	Unspecified'
ABplppapap'	WT_Sample6'	180	AB'	Neuron'
ABpraaaaap'	WT_Sample6'	180	AB'	Unspecified'
ABprppappa'	WT_Sample6'	180	AB'	Neuron'
ABalapaapa'	WT_Sample6'	181	AB'	Unspecified'
ABplppaapa'	WT_Sample6'	181	AB'	Unspecified'
ABprppapap'	WT_Sample6'	181	AB'	Neuron'
Cappaa'	WT_Sample6'	181	C'	Muscle'
ABalpppaap'	WT_Sample6'	182	AB'	Unspecified'
ABplpppppa'	WT_Sample6'	182	AB'	Other'
ABprppaapp'	WT_Sample6'	182	AB'	Neuron'
Cappaa'	WT_Sample6'	182	C'	Muscle'
ABalaaapar'	WT_Sample6'	183	AB'	Unspecified'
ABalppaaap'	WT_Sample6'	183	AB'	Neuron'
ABarpaaaap'	WT_Sample6'	184	AB'	Neuron'
ABprppaapa'	WT_Sample6'	186	AB'	Unspecified'
ABarpaaapa'	WT_Sample6'	187	AB'	Neuron'
ABprppappp'	WT_Sample6'	187	AB'	Neuron'
ABalappaap'	WT_Sample6'	188	AB'	Unspecified'
Cappap'	WT_Sample6'	188	C'	Muscle'
Cppppp'	WT_Sample6'	188	C'	Muscle'
ABaraaaapa'	WT_Sample6'	189	AB'	Unspecified'
ABarapappa'	WT_Sample6'	189	AB'	Unspecified'
ABarpaaaaa'	WT_Sample6'	189	AB'	Neuron'
Capppa'	WT_Sample6'	189	C'	Muscle'
ABalaapaaa'	WT_Sample6'	190	AB'	Unspecified'
Capapa'	WT_Sample6'	190	C'	Muscle'
Capapa'	WT_Sample6'	191	C'	Muscle'
Capaaa'	WT_Sample6'	192	C'	Muscle'
Cppaaa'	WT_Sample6'	192	C'	Muscle'
Cppapa'	WT_Sample6'	192	C'	Muscle'
ABplapppaa'	WT_Sample6'	194	AB'	Unspecified'
ABalppppppp'	WT_Sample6'	196	AB'	Neuron'
Capapp'	WT_Sample6'	196	C'	Muscle'
ABprapppaa'	WT_Sample6'	197	AB'	Unspecified'
Capaap'	WT_Sample6'	197	C'	Muscle'
Cppaap'	WT_Sample6'	197	C'	Muscle'
Cppapp'	WT_Sample6'	198	C'	Muscle'
Capppp'	WT_Sample6'	199	C'	Muscle'
Ealaa'	WT_Sample6'	199	E'	Intestine'
MSpapapa'	WT_Sample6'	200	MS'	Unspecified'
Dappa'	WT_Sample6'	201	D'	Muscle'
Dappa'	WT_Sample6'	202	D'	Muscle'
Dpppa'	WT_Sample6'	202	D'	Muscle'
MSpapppa'	WT_Sample6'	202	MS'	Muscle'
Dappa'	WT_Sample6'	203	D'	Muscle'
MSaapapa'	WT_Sample6'	203	MS'	Unspecified'
Dappa'	WT_Sample6'	204	D'	Muscle'
ABalppppppa'	WT_Sample6'	205	AB'	Unspecified'
Dappa'	WT_Sample6'	205	D'	Muscle'
ABa'	WT_Sample7'	2	AB'	Unspecified'
ABp'	WT_Sample7'	2	AB'	Unspecified'
ABa'	WT_Sample7'	3	AB'	Unspecified'
ABp'	WT_Sample7'	3	AB'	Unspecified'
EMS'	WT_Sample7'	5	/'	Unspecified'
EMS'	WT_Sample7'	6	/'	Unspecified'
P2'	WT_Sample7'	8	/'	Unspecified'
P2'	WT_Sample7'	9	/'	Unspecified'
ABal'	WT_Sample7'	13	AB'	Unspecified'
ABar'	WT_Sample7'	13	AB'	Unspecified'
ABpl'	WT_Sample7'	13	AB'	Unspecified'
ABpr'	WT_Sample7'	13	AB'	Unspecified'
ABal'	WT_Sample7'	14	AB'	Unspecified'
ABar'	WT_Sample7'	14	AB'	Unspecified'
ABpl'	WT_Sample7'	14	AB'	Unspecified'
ABpr'	WT_Sample7'	14	AB'	Unspecified'
ABar'	WT_Sample7'	15	AB'	Unspecified'
MS'	WT_Sample7'	17	MS'	Unspecified'
MS'	WT_Sample7'	18	MS'	Unspecified'
MS'	WT_Sample7'	19	MS'	Unspecified'
C'	WT_Sample7'	21	C'	Unspecified'
C'	WT_Sample7'	22	C'	Unspecified'
ABala'	WT_Sample7'	25	AB'	Unspecified'
ABalp'	WT_Sample7'	25	AB'	Unspecified'
ABara'	WT_Sample7'	25	AB'	Unspecified'
ABarp'	WT_Sample7'	25	AB'	Unspecified'
ABpla'	WT_Sample7'	25	AB'	Unspecified'
ABplp'	WT_Sample7'	25	AB'	Unspecified'
ABpra'	WT_Sample7'	25	AB'	Unspecified'
P3'	WT_Sample7'	25	/'	Unspecified'
ABala'	WT_Sample7'	26	AB'	Unspecified'
ABalp'	WT_Sample7'	26	AB'	Unspecified'
ABara'	WT_Sample7'	26	AB'	Unspecified'
ABarp'	WT_Sample7'	26	AB'	Unspecified'
ABprp'	WT_Sample7'	26	AB'	Unspecified'
ABala'	WT_Sample7'	27	AB'	Unspecified'
MSa'	WT_Sample7'	32	MS'	Unspecified'
MSp'	WT_Sample7'	32	MS'	Unspecified'
MSa'	WT_Sample7'	33	MS'	Unspecified'
MSp'	WT_Sample7'	33	MS'	Unspecified'
MSa'	WT_Sample7'	34	MS'	Unspecified'
Ca'	WT_Sample7'	37	C'	Unspecified'
Ca'	WT_Sample7'	38	C'	Unspecified'
Cp'	WT_Sample7'	38	C'	Unspecified'
Ca'	WT_Sample7'	39	C'	Unspecified'
ABplaa'	WT_Sample7'	42	AB'	Unspecified'
ABplap'	WT_Sample7'	42	AB'	Unspecified'
ABpraa'	WT_Sample7'	42	AB'	Unspecified'
ABprap'	WT_Sample7'	42	AB'	Unspecified'
ABalaa'	WT_Sample7'	43	AB'	Unspecified'
ABalap'	WT_Sample7'	43	AB'	Unspecified'
ABalpa'	WT_Sample7'	43	AB'	Unspecified'
ABalpp'	WT_Sample7'	43	AB'	Unspecified'
ABaraa'	WT_Sample7'	43	AB'	Unspecified'
ABarap'	WT_Sample7'	43	AB'	Unspecified'
ABplap'	WT_Sample7'	43	AB'	Unspecified'
ABplpa'	WT_Sample7'	43	AB'	Unspecified'
ABplpp'	WT_Sample7'	43	AB'	Unspecified'
ABprap'	WT_Sample7'	43	AB'	Unspecified'
ABprpa'	WT_Sample7'	43	AB'	Unspecified'
ABprpp'	WT_Sample7'	43	AB'	Unspecified'
ABalap'	WT_Sample7'	44	AB'	Unspecified'
ABalpa'	WT_Sample7'	44	AB'	Unspecified'
ABalpp'	WT_Sample7'	44	AB'	Unspecified'
ABarap'	WT_Sample7'	44	AB'	Unspecified'
ABarpa'	WT_Sample7'	44	AB'	Unspecified'
ABarpp'	WT_Sample7'	44	AB'	Unspecified'
ABplpa'	WT_Sample7'	44	AB'	Unspecified'
ABprpa'	WT_Sample7'	44	AB'	Unspecified'
ABalap'	WT_Sample7'	45	AB'	Unspecified'
ABarpp'	WT_Sample7'	45	AB'	Unspecified'
Ea'	WT_Sample7'	46	E'	Intestine'
Ea'	WT_Sample7'	47	E'	Intestine'
Ep'	WT_Sample7'	47	E'	Intestine'
Ep'	WT_Sample7'	48	E'	Intestine'
D'	WT_Sample7'	49	D'	Muscle'
Ep'	WT_Sample7'	49	E'	Intestine'
MSpa'	WT_Sample7'	50	MS'	Unspecified'
MSaa'	WT_Sample7'	51	MS'	Unspecified'
MSpa'	WT_Sample7'	51	MS'	Unspecified'
MSaa'	WT_Sample7'	52	MS'	Unspecified'
MSap'	WT_Sample7'	52	MS'	Unspecified'
MSpa'	WT_Sample7'	52	MS'	Unspecified'
MSpp'	WT_Sample7'	52	MS'	Unspecified'
MSap'	WT_Sample7'	53	MS'	Unspecified'
MSpa'	WT_Sample7'	53	MS'	Unspecified'
MSpp'	WT_Sample7'	53	MS'	Unspecified'
MSap'	WT_Sample7'	54	MS'	Unspecified'
Caa'	WT_Sample7'	59	C'	Unspecified'
ABplaap'	WT_Sample7'	60	AB'	Unspecified'
ABpraap'	WT_Sample7'	60	AB'	Unspecified'
Caa'	WT_Sample7'	60	C'	Unspecified'
Cpa'	WT_Sample7'	60	C'	Skin'
ABpraap'	WT_Sample7'	61	AB'	Unspecified'
ABalppp'	WT_Sample7'	62	AB'	Unspecified'
ABaraap'	WT_Sample7'	62	AB'	Unspecified'
ABarpaa'	WT_Sample7'	62	AB'	Unspecified'
ABplaaa'	WT_Sample7'	62	AB'	Unspecified'
ABplapa'	WT_Sample7'	62	AB'	Unspecified'
ABplapp'	WT_Sample7'	62	AB'	Unspecified'
ABplpap'	WT_Sample7'	62	AB'	Unspecified'
ABpraaa'	WT_Sample7'	62	AB'	Unspecified'
ABprapp'	WT_Sample7'	62	AB'	Unspecified'
Cpp'	WT_Sample7'	62	C'	Muscle'
ABalaaa'	WT_Sample7'	63	AB'	Unspecified'
ABalaap'	WT_Sample7'	63	AB'	Unspecified'
ABalapa'	WT_Sample7'	63	AB'	Unspecified'
ABalapp'	WT_Sample7'	63	AB'	Unspecified'
ABalpaa'	WT_Sample7'	63	AB'	Unspecified'
ABalpap'	WT_Sample7'	63	AB'	Unspecified'
ABalppp'	WT_Sample7'	63	AB'	Unspecified'
ABaraaa'	WT_Sample7'	63	AB'	Unspecified'
ABarapa'	WT_Sample7'	63	AB'	Unspecified'
ABarapp'	WT_Sample7'	63	AB'	Unspecified'
ABarpap'	WT_Sample7'	63	AB'	Unspecified'
ABarppa'	WT_Sample7'	63	AB'	Unspecified'
ABarppp'	WT_Sample7'	63	AB'	Unspecified'
ABplpaa'	WT_Sample7'	63	AB'	Unspecified'
ABplpap'	WT_Sample7'	63	AB'	Unspecified'
ABplppp'	WT_Sample7'	63	AB'	Unspecified'
ABpraaa'	WT_Sample7'	63	AB'	Unspecified'
ABprapa'	WT_Sample7'	63	AB'	Unspecified'
ABprapp'	WT_Sample7'	63	AB'	Unspecified'
ABprpap'	WT_Sample7'	63	AB'	Unspecified'
ABprppp'	WT_Sample7'	63	AB'	Unspecified'
Cpp'	WT_Sample7'	63	C'	Muscle'
ABalaaa'	WT_Sample7'	64	AB'	Unspecified'
ABalaap'	WT_Sample7'	64	AB'	Unspecified'
ABalapp'	WT_Sample7'	64	AB'	Unspecified'
ABalppa'	WT_Sample7'	64	AB'	Unspecified'
ABalppp'	WT_Sample7'	64	AB'	Unspecified'
ABarapa'	WT_Sample7'	64	AB'	Unspecified'
ABarapp'	WT_Sample7'	64	AB'	Unspecified'
ABarpap'	WT_Sample7'	64	AB'	Unspecified'
ABarppp'	WT_Sample7'	64	AB'	Unspecified'
ABplppa'	WT_Sample7'	64	AB'	Unspecified'
ABplppp'	WT_Sample7'	64	AB'	Unspecified'
ABprapp'	WT_Sample7'	64	AB'	Unspecified'
ABprpaa'	WT_Sample7'	64	AB'	Unspecified'
ABprpap'	WT_Sample7'	64	AB'	Unspecified'
ABprppa'	WT_Sample7'	64	AB'	Unspecified'
Cap'	WT_Sample7'	64	C'	Muscle'
ABprppa'	WT_Sample7'	65	AB'	Unspecified'
MSpap'	WT_Sample7'	70	MS'	Unspecified'
MSaaa'	WT_Sample7'	71	MS'	Unspecified'
MSaap'	WT_Sample7'	71	MS'	Unspecified'
MSpaa'	WT_Sample7'	71	MS'	Unspecified'
MSpap'	WT_Sample7'	71	MS'	Unspecified'
MSaaa'	WT_Sample7'	72	MS'	Unspecified'
MSaap'	WT_Sample7'	72	MS'	Unspecified'
MSpaa'	WT_Sample7'	72	MS'	Unspecified'
MSaaa'	WT_Sample7'	73	MS'	Unspecified'
MSaap'	WT_Sample7'	73	MS'	Unspecified'
MSapa'	WT_Sample7'	73	MS'	Unspecified'
MSapp'	WT_Sample7'	73	MS'	Unspecified'
MSppp'	WT_Sample7'	73	MS'	Unspecified'
MSaap'	WT_Sample7'	74	MS'	Unspecified'
MSapa'	WT_Sample7'	74	MS'	Unspecified'
MSapp'	WT_Sample7'	74	MS'	Unspecified'
MSppa'	WT_Sample7'	74	MS'	Unspecified'
P4'	WT_Sample7'	74	/'	Germ Cell'
Eal'	WT_Sample7'	75	E'	Intestine'
MSaap'	WT_Sample7'	75	MS'	Unspecified'
MSapp'	WT_Sample7'	75	MS'	Unspecified'
P4'	WT_Sample7'	75	/'	Germ Cell'
Eal'	WT_Sample7'	76	E'	Intestine'
Ear'	WT_Sample7'	76	E'	Intestine'
MSaap'	WT_Sample7'	76	MS'	Unspecified'
P4'	WT_Sample7'	76	/'	Germ Cell'
Eal'	WT_Sample7'	77	E'	Intestine'
Ear'	WT_Sample7'	77	E'	Intestine'
MSaap'	WT_Sample7'	77	MS'	Unspecified'
P4'	WT_Sample7'	77	/'	Germ Cell'
Eal'	WT_Sample7'	78	E'	Intestine'
Ear'	WT_Sample7'	78	E'	Intestine'
Epl'	WT_Sample7'	78	E'	Intestine'
Epr'	WT_Sample7'	78	E'	Intestine'
MSaap'	WT_Sample7'	78	MS'	Unspecified'
P4'	WT_Sample7'	78	/'	Germ Cell'
Epl'	WT_Sample7'	79	E'	Intestine'
Epr'	WT_Sample7'	79	E'	Intestine'
MSaap'	WT_Sample7'	79	MS'	Unspecified'
P4'	WT_Sample7'	79	/'	Germ Cell'
MSaap'	WT_Sample7'	80	MS'	Unspecified'
Dp'	WT_Sample7'	81	D'	Muscle'
MSaap'	WT_Sample7'	81	MS'	Unspecified'
ABplaapp'	WT_Sample7'	82	AB'	Skin'
Dp'	WT_Sample7'	82	D'	Muscle'
MSaap'	WT_Sample7'	82	MS'	Unspecified'
ABpraapp'	WT_Sample7'	83	AB'	Skin'
Caaa'	WT_Sample7'	83	C'	Skin'
Da'	WT_Sample7'	83	D'	Muscle'
Dp'	WT_Sample7'	83	D'	Muscle'
MSaap'	WT_Sample7'	83	MS'	Unspecified'
ABplaapa'	WT_Sample7'	84	AB'	Unspecified'
ABplpapp'	WT_Sample7'	84	AB'	Unspecified'
Cpaa'	WT_Sample7'	84	C'	Skin'
Cpap'	WT_Sample7'	84	C'	Skin'
Da'	WT_Sample7'	84	D'	Muscle'
MSaap'	WT_Sample7'	84	MS'	Unspecified'
ABalpaap'	WT_Sample7'	85	AB'	Unspecified'
ABalpapp'	WT_Sample7'	85	AB'	Unspecified'
ABalpppp'	WT_Sample7'	85	AB'	Unspecified'
ABaraapp'	WT_Sample7'	85	AB'	Unspecified'
ABplapap'	WT_Sample7'	85	AB'	Unspecified'
ABplpapp'	WT_Sample7'	85	AB'	Unspecified'
ABpraapa'	WT_Sample7'	85	AB'	Unspecified'
Da'	WT_Sample7'	85	D'	Muscle'
MSaap'	WT_Sample7'	85	MS'	Unspecified'
ABalappp'	WT_Sample7'	86	AB'	Unspecified'
ABalpapa'	WT_Sample7'	86	AB'	Unspecified'
ABalpapp'	WT_Sample7'	86	AB'	Unspecified'
ABalpppp'	WT_Sample7'	86	AB'	Unspecified'
ABaraaap'	WT_Sample7'	86	AB'	Unspecified'
ABaraapa'	WT_Sample7'	86	AB'	Unspecified'
ABarapap'	WT_Sample7'	86	AB'	Unspecified'
ABplaaaa'	WT_Sample7'	86	AB'	Unspecified'
ABplappa'	WT_Sample7'	86	AB'	Skin'
ABplpaap'	WT_Sample7'	86	AB'	Unspecified'
ABplpapa'	WT_Sample7'	86	AB'	Unspecified'
ABpraaap'	WT_Sample7'	86	AB'	Unspecified'
ABpraapa'	WT_Sample7'	86	AB'	Unspecified'
ABprapap'	WT_Sample7'	86	AB'	Unspecified'
ABprpapp'	WT_Sample7'	86	AB'	Unspecified'
Da'	WT_Sample7'	86	D'	Muscle'
MSaap'	WT_Sample7'	86	MS'	Unspecified'
ABalappp'	WT_Sample7'	87	AB'	Unspecified'
ABalppap'	WT_Sample7'	87	AB'	Unspecified'
ABalpppa'	WT_Sample7'	87	AB'	Unspecified'
ABarapap'	WT_Sample7'	87	AB'	Unspecified'
ABarpaap'	WT_Sample7'	87	AB'	Skin'
ABarpapa'	WT_Sample7'	87	AB'	Unspecified'
ABarpapp'	WT_Sample7'	87	AB'	Skin'
ABplaaap'	WT_Sample7'	87	AB'	Skin'
ABplpaaa'	WT_Sample7'	87	AB'	Unspecified'
ABplpapa'	WT_Sample7'	87	AB'	Unspecified'
ABplpppa'	WT_Sample7'	87	AB'	Unspecified'
ABplpppp'	WT_Sample7'	87	AB'	Unspecified'
ABpraaap'	WT_Sample7'	87	AB'	Unspecified'
ABprpapa'	WT_Sample7'	87	AB'	Unspecified'
ABalapap'	WT_Sample7'	88	AB'	Unspecified'
ABalppap'	WT_Sample7'	88	AB'	Unspecified'
ABarapaa'	WT_Sample7'	88	AB'	Unspecified'
ABarappa'	WT_Sample7'	88	AB'	Unspecified'
ABarappp'	WT_Sample7'	88	AB'	Unspecified'
ABarpapp'	WT_Sample7'	88	AB'	Skin'
ABplapaa'	WT_Sample7'	88	AB'	Unspecified'
ABplpppa'	WT_Sample7'	88	AB'	Unspecified'
ABplpppp'	WT_Sample7'	88	AB'	Unspecified'
ABprapaa'	WT_Sample7'	88	AB'	Unspecified'
ABprpaaa'	WT_Sample7'	88	AB'	Unspecified'
ABprpaap'	WT_Sample7'	88	AB'	Unspecified'
ABprpppa'	WT_Sample7'	88	AB'	Unspecified'
ABprpppp'	WT_Sample7'	88	AB'	Unspecified'
ABalaapp'	WT_Sample7'	89	AB'	Unspecified'
ABalappa'	WT_Sample7'	89	AB'	Unspecified'
ABarappa'	WT_Sample7'	89	AB'	Unspecified'
ABarappp'	WT_Sample7'	89	AB'	Unspecified'
ABarpppa'	WT_Sample7'	89	AB'	Unspecified'
ABplappp'	WT_Sample7'	89	AB'	Unspecified'
ABplppap'	WT_Sample7'	89	AB'	Neuron'
ABplpppa'	WT_Sample7'	89	AB'	Unspecified'
ABpraaaa'	WT_Sample7'	89	AB'	Unspecified'
ABprappa'	WT_Sample7'	89	AB'	Skin'
ABalapaa'	WT_Sample7'	90	AB'	Unspecified'
ABalappa'	WT_Sample7'	90	AB'	Unspecified'
ABalpaaa'	WT_Sample7'	90	AB'	Unspecified'
ABarppap'	WT_Sample7'	90	AB'	Skin'
ABarpppa'	WT_Sample7'	90	AB'	Unspecified'
ABplppaa'	WT_Sample7'	90	AB'	Unspecified'
ABpraaaa'	WT_Sample7'	90	AB'	Unspecified'
ABprappp'	WT_Sample7'	90	AB'	Unspecified'
ABprppap'	WT_Sample7'	90	AB'	Neuron'
ABalaaaa'	WT_Sample7'	91	AB'	Unspecified'
ABalaapa'	WT_Sample7'	91	AB'	Unspecified'
ABalapaa'	WT_Sample7'	91	AB'	Unspecified'
ABalpaaa'	WT_Sample7'	91	AB'	Unspecified'
ABalppaa'	WT_Sample7'	91	AB'	Unspecified'
ABarppaa'	WT_Sample7'	91	AB'	Unspecified'
ABarppap'	WT_Sample7'	91	AB'	Skin'
ABarpppp'	WT_Sample7'	91	AB'	Skin'
ABplppaa'	WT_Sample7'	91	AB'	Unspecified'
ABprappp'	WT_Sample7'	91	AB'	Unspecified'
ABprppap'	WT_Sample7'	91	AB'	Neuron'
Caap'	WT_Sample7'	91	C'	Unspecified'
Cppp'	WT_Sample7'	91	C'	Muscle'
ABalppaa'	WT_Sample7'	92	AB'	Unspecified'
ABaraaaa'	WT_Sample7'	92	AB'	Unspecified'
ABarpaaa'	WT_Sample7'	92	AB'	Unspecified'
ABarppap'	WT_Sample7'	92	AB'	Skin'
ABprppaa'	WT_Sample7'	92	AB'	Unspecified'
Caap'	WT_Sample7'	92	C'	Unspecified'
Cppp'	WT_Sample7'	92	C'	Muscle'
MSpaaa'	WT_Sample7'	92	MS'	Unspecified'
MSaaaa'	WT_Sample7'	93	MS'	Unspecified'
MSpaaa'	WT_Sample7'	93	MS'	Unspecified'
MSpapa'	WT_Sample7'	93	MS'	Unspecified'
MSaapa'	WT_Sample7'	94	MS'	Unspecified'
MSpapa'	WT_Sample7'	94	MS'	Unspecified'
MSaaap'	WT_Sample7'	95	MS'	Unspecified'
MSaapa'	WT_Sample7'	95	MS'	Unspecified'
MSpapa'	WT_Sample7'	95	MS'	Unspecified'
MSaaap'	WT_Sample7'	96	MS'	Unspecified'
MSaapa'	WT_Sample7'	96	MS'	Unspecified'
Capp'	WT_Sample7'	97	C'	Muscle'
Cppa'	WT_Sample7'	97	C'	Muscle'
MSaaap'	WT_Sample7'	97	MS'	Unspecified'
MSaapa'	WT_Sample7'	97	MS'	Unspecified'
MSpaap'	WT_Sample7'	97	MS'	Unspecified'
Cppa'	WT_Sample7'	98	C'	Muscle'
MSppap'	WT_Sample7'	98	MS'	Unspecified'
MSapaa'	WT_Sample7'	99	MS'	Unspecified'
MSapap'	WT_Sample7'	99	MS'	Unspecified'
Capa'	WT_Sample7'	100	C'	Muscle'
MSapap'	WT_Sample7'	100	MS'	Unspecified'
MSpapp'	WT_Sample7'	100	MS'	Muscle'
MSppaa'	WT_Sample7'	100	MS'	Unspecified'
Capa'	WT_Sample7'	101	C'	Muscle'
MSaapp'	WT_Sample7'	101	MS'	Unspecified'
MSpapp'	WT_Sample7'	101	MS'	Muscle'
MSppaa'	WT_Sample7'	101	MS'	Unspecified'
MSpppa'	WT_Sample7'	101	MS'	Unspecified'
MSaapp'	WT_Sample7'	102	MS'	Unspecified'
MSappa'	WT_Sample7'	102	MS'	Unspecified'
MSpppa'	WT_Sample7'	102	MS'	Unspecified'
MSpppp'	WT_Sample7'	102	MS'	Muscle'
MSappa'	WT_Sample7'	103	MS'	Unspecified'
MSappp'	WT_Sample7'	104	MS'	Muscle'
Dpp'	WT_Sample7'	111	D'	Muscle'
ABalpaapa'	WT_Sample7'	112	AB'	Unspecified'
ABplaappp'	WT_Sample7'	112	AB'	Skin'
Dap'	WT_Sample7'	112	D'	Muscle'
Dpp'	WT_Sample7'	112	D'	Muscle'
ABalpaapa'	WT_Sample7'	113	AB'	Unspecified'
ABalppppp'	WT_Sample7'	113	AB'	Unspecified'
ABplaappp'	WT_Sample7'	113	AB'	Skin'
Daa'	WT_Sample7'	113	D'	Muscle'
Dpp'	WT_Sample7'	113	D'	Muscle'
ABalpappp'	WT_Sample7'	114	AB'	Unspecified'
ABalppppp'	WT_Sample7'	114	AB'	Unspecified'
ABaraaapa'	WT_Sample7'	114	AB'	Unspecified'
ABarapapp'	WT_Sample7'	114	AB'	Unspecified'
ABplpappa'	WT_Sample7'	114	AB'	Unspecified'
ABpraaapp'	WT_Sample7'	114	AB'	Unspecified'
Caaap'	WT_Sample7'	114	C'	Skin'
Daa'	WT_Sample7'	114	D'	Muscle'
Dpa'	WT_Sample7'	114	D'	Muscle'
Dpp'	WT_Sample7'	114	D'	Muscle'
ABalpappa'	WT_Sample7'	115	AB'	Unspecified'
ABalppppa'	WT_Sample7'	115	AB'	Unspecified'
ABarapapp'	WT_Sample7'	115	AB'	Unspecified'
ABplpappa'	WT_Sample7'	115	AB'	Unspecified'
ABpraappp'	WT_Sample7'	115	AB'	Skin'
Cpaap'	WT_Sample7'	115	C'	Skin'
Daa'	WT_Sample7'	115	D'	Muscle'
Dpa'	WT_Sample7'	115	D'	Muscle'
ABalppppa'	WT_Sample7'	116	AB'	Unspecified'
ABaraapap'	WT_Sample7'	116	AB'	Unspecified'
ABplaapap'	WT_Sample7'	116	AB'	Unspecified'
ABplpappa'	WT_Sample7'	116	AB'	Unspecified'
ABprpappa'	WT_Sample7'	116	AB'	Neuron'
Caaaa'	WT_Sample7'	116	C'	Skin'
Cpaap'	WT_Sample7'	116	C'	Skin'
Daa'	WT_Sample7'	116	D'	Muscle'
Dpa'	WT_Sample7'	116	D'	Muscle'
ABalapppa'	WT_Sample7'	117	AB'	Unspecified'
ABalppapp'	WT_Sample7'	117	AB'	Unspecified'
ABalpppap'	WT_Sample7'	117	AB'	Unspecified'
ABaraapaa'	WT_Sample7'	117	AB'	Pharynx'
ABarapapa'	WT_Sample7'	117	AB'	Unspecified'
ABarpaapp'	WT_Sample7'	117	AB'	Skin'
ABplaappa'	WT_Sample7'	117	AB'	Skin'
ABplpaaaa'	WT_Sample7'	117	AB'	Unspecified'
ABprapapp'	WT_Sample7'	117	AB'	Unspecified'
ABprpappa'	WT_Sample7'	117	AB'	Neuron'
ABprpappp'	WT_Sample7'	117	AB'	Unspecified'
Daa'	WT_Sample7'	117	D'	Muscle'
Dpa'	WT_Sample7'	117	D'	Muscle'
ABalaaapp'	WT_Sample7'	118	AB'	Unspecified'
ABalapppp'	WT_Sample7'	118	AB'	Unspecified'
ABalppapa'	WT_Sample7'	118	AB'	Neuron'
ABaraappp'	WT_Sample7'	118	AB'	Unspecified'
ABarapaap'	WT_Sample7'	118	AB'	Unspecified'
ABarapapa'	WT_Sample7'	118	AB'	Unspecified'
ABarpaapa'	WT_Sample7'	118	AB'	Skin'
ABplaapaa'	WT_Sample7'	118	AB'	Unspecified'
ABplpaaaa'	WT_Sample7'	118	AB'	Unspecified'
ABplpaapp'	WT_Sample7'	118	AB'	Unspecified'
ABplppppa'	WT_Sample7'	118	AB'	Unspecified'
ABpraappa'	WT_Sample7'	118	AB'	Skin'
ABprpappp'	WT_Sample7'	118	AB'	Unspecified'
Cpaaa'	WT_Sample7'	118	C'	Skin'
Daa'	WT_Sample7'	118	D'	Muscle'
Dpa'	WT_Sample7'	118	D'	Muscle'
ABalapapp'	WT_Sample7'	119	AB'	Unspecified'
ABalapppp'	WT_Sample7'	119	AB'	Unspecified'
ABalpapaa'	WT_Sample7'	119	AB'	Unspecified'
ABalpapap'	WT_Sample7'	119	AB'	Unspecified'
ABarapppp'	WT_Sample7'	119	AB'	Unspecified'
ABplaaaap'	WT_Sample7'	119	AB'	Skin'
ABplappaa'	WT_Sample7'	119	AB'	Skin'
ABplpaaaa'	WT_Sample7'	119	AB'	Unspecified'
ABplpaaap'	WT_Sample7'	119	AB'	Unspecified'
ABplpppaa'	WT_Sample7'	119	AB'	Neuron'
ABplpppap'	WT_Sample7'	119	AB'	Unspecified'
ABplppppa'	WT_Sample7'	119	AB'	Unspecified'
ABpraapap'	WT_Sample7'	119	AB'	Unspecified'
ABprpaaaa'	WT_Sample7'	119	AB'	Unspecified'
ABprpaapp'	WT_Sample7'	119	AB'	Unspecified'
ABprpapap'	WT_Sample7'	119	AB'	Unspecified'
ABprppppa'	WT_Sample7'	119	AB'	Unspecified'
ABprppppp'	WT_Sample7'	119	AB'	Unspecified'
Daa'	WT_Sample7'	119	D'	Muscle'
Dpa'	WT_Sample7'	119	D'	Muscle'
ABalaappp'	WT_Sample7'	120	AB'	Unspecified'
ABalapppp'	WT_Sample7'	120	AB'	Unspecified'
ABaraaapp'	WT_Sample7'	120	AB'	Skin'
ABarappap'	WT_Sample7'	120	AB'	Unspecified'
ABarapppp'	WT_Sample7'	120	AB'	Unspecified'
ABarpapaa'	WT_Sample7'	120	AB'	Unspecified'
ABarpapap'	WT_Sample7'	120	AB'	Skin'
ABarpappp'	WT_Sample7'	120	AB'	Skin'
ABplaaapp'	WT_Sample7'	120	AB'	Skin'
ABplapapa'	WT_Sample7'	120	AB'	Unspecified'
ABplappap'	WT_Sample7'	120	AB'	Skin'
ABplpaaap'	WT_Sample7'	120	AB'	Unspecified'
ABplpaapa'	WT_Sample7'	120	AB'	Unspecified'
ABplpapap'	WT_Sample7'	120	AB'	Unspecified'
ABplpppaa'	WT_Sample7'	120	AB'	Neuron'
ABplpppap'	WT_Sample7'	120	AB'	Unspecified'
ABplppppa'	WT_Sample7'	120	AB'	Unspecified'
ABplppppp'	WT_Sample7'	120	AB'	Unspecified'
ABpraaapa'	WT_Sample7'	120	AB'	Unspecified'
ABprapaaa'	WT_Sample7'	120	AB'	Unspecified'
ABprapapa'	WT_Sample7'	120	AB'	Unspecified'
ABprpaaap'	WT_Sample7'	120	AB'	Unspecified'
Cpapp'	WT_Sample7'	120	C'	Skin'
Daa'	WT_Sample7'	120	D'	Muscle'
Dpa'	WT_Sample7'	120	D'	Muscle'
MSaaaaa'	WT_Sample7'	120	MS'	Unspecified'
MSpaaaa'	WT_Sample7'	120	MS'	Unspecified'
MSpaaap'	WT_Sample7'	120	MS'	Pharynx'
MSpapaa'	WT_Sample7'	120	MS'	Unspecified'
ABalaaaal'	WT_Sample7'	121	AB'	Unspecified'
ABalappap'	WT_Sample7'	121	AB'	Unspecified'
ABalpppaa'	WT_Sample7'	121	AB'	Unspecified'
ABarapppa'	WT_Sample7'	121	AB'	Neuron'
ABplaaaaa'	WT_Sample7'	121	AB'	Unspecified'
ABplapaaa'	WT_Sample7'	121	AB'	Unspecified'
ABplpapap'	WT_Sample7'	121	AB'	Unspecified'
ABplppapa'	WT_Sample7'	121	AB'	Neuron'
ABplppppa'	WT_Sample7'	121	AB'	Unspecified'
ABpraaaap'	WT_Sample7'	121	AB'	Unspecified'
ABprpaapa'	WT_Sample7'	121	AB'	Unspecified'
ABprpapaa'	WT_Sample7'	121	AB'	Neuron'
Cpapa'	WT_Sample7'	121	C'	Skin'
Cpapp'	WT_Sample7'	121	C'	Skin'
Daa'	WT_Sample7'	121	D'	Muscle'
Dpa'	WT_Sample7'	121	D'	Muscle'
Eala'	WT_Sample7'	121	E'	Intestine'
MSaaapa'	WT_Sample7'	121	MS'	Pharynx'
MSaapaa'	WT_Sample7'	121	MS'	Unspecified'
MSpaaap'	WT_Sample7'	121	MS'	Pharynx'
ABarapaaa'	WT_Sample7'	122	AB'	Unspecified'
ABarpppap'	WT_Sample7'	122	AB'	Unspecified'
ABplpapaa'	WT_Sample7'	122	AB'	Neuron'
ABplppapp'	WT_Sample7'	122	AB'	Neuron'
ABplppppa'	WT_Sample7'	122	AB'	Unspecified'
ABprappap'	WT_Sample7'	122	AB'	Skin'
ABprppapa'	WT_Sample7'	122	AB'	Neuron'
Daa'	WT_Sample7'	122	D'	Muscle'
Dpa'	WT_Sample7'	122	D'	Muscle'
ABalapaap'	WT_Sample7'	123	AB'	Unspecified'
ABalapapa'	WT_Sample7'	123	AB'	Unspecified'
ABarapaaa'	WT_Sample7'	123	AB'	Unspecified'
ABarpppap'	WT_Sample7'	123	AB'	Unspecified'
ABplapaap'	WT_Sample7'	123	AB'	Unspecified'
ABplppapp'	WT_Sample7'	123	AB'	Neuron'
ABplppppa'	WT_Sample7'	123	AB'	Unspecified'
ABprapaap'	WT_Sample7'	123	AB'	Unspecified'
Daa'	WT_Sample7'	123	D'	Muscle'
Dpa'	WT_Sample7'	123	D'	Muscle'
Ealp'	WT_Sample7'	123	E'	Intestine'
Eara'	WT_Sample7'	123	E'	Intestine'
MSaaaap'	WT_Sample7'	123	MS'	Unspecified'
ABalaaaar'	WT_Sample7'	124	AB'	Unspecified'
ABarpappa'	WT_Sample7'	124	AB'	Skin'
ABplppaap'	WT_Sample7'	124	AB'	Unspecified'
ABprappaa'	WT_Sample7'	124	AB'	Skin'
ABprppaap'	WT_Sample7'	124	AB'	Unspecified'
Daa'	WT_Sample7'	124	D'	Muscle'
Dpa'	WT_Sample7'	124	D'	Muscle'
MSaaaap'	WT_Sample7'	124	MS'	Unspecified'
ABalaapaa'	WT_Sample7'	125	AB'	Unspecified'
ABalaapap'	WT_Sample7'	125	AB'	Unspecified'
ABalaappa'	WT_Sample7'	125	AB'	Unspecified'
ABalapaaa'	WT_Sample7'	125	AB'	Unspecified'
ABalpaaap'	WT_Sample7'	125	AB'	Unspecified'
ABarppppa'	WT_Sample7'	125	AB'	Skin'
ABplapppa'	WT_Sample7'	125	AB'	Unspecified'
ABpraaaaa'	WT_Sample7'	125	AB'	Unspecified'
ABprppapp'	WT_Sample7'	125	AB'	Neuron'
Daa'	WT_Sample7'	125	D'	Muscle'
Dpa'	WT_Sample7'	125	D'	Muscle'
Epla'	WT_Sample7'	125	E'	Intestine'
MSpapap'	WT_Sample7'	125	MS'	Unspecified'
ABalppaap'	WT_Sample7'	126	AB'	Unspecified'
ABaraaaaa'	WT_Sample7'	126	AB'	Pharynx'
ABarppaap'	WT_Sample7'	126	AB'	Unspecified'
ABarppapa'	WT_Sample7'	126	AB'	Skin'
ABarpppaa'	WT_Sample7'	126	AB'	Unspecified'
ABarppppa'	WT_Sample7'	126	AB'	Skin'
ABarppppp'	WT_Sample7'	126	AB'	Skin'
ABplapppp'	WT_Sample7'	126	AB'	Skin'
ABplppaaa'	WT_Sample7'	126	AB'	Unspecified'
ABprapppp'	WT_Sample7'	126	AB'	Skin'
Dpa'	WT_Sample7'	126	D'	Muscle'
Earp'	WT_Sample7'	126	E'	Intestine'
Epla'	WT_Sample7'	126	E'	Intestine'
MSpapap'	WT_Sample7'	126	MS'	Unspecified'
ABalppaaa'	WT_Sample7'	127	AB'	Unspecified'
ABarpaaaa'	WT_Sample7'	127	AB'	Neuron'
ABprapppa'	WT_Sample7'	127	AB'	Unspecified'
Cpppa'	WT_Sample7'	127	C'	Muscle'
Cpppp'	WT_Sample7'	127	C'	Muscle'
Dpa'	WT_Sample7'	127	D'	Muscle'
Earp'	WT_Sample7'	127	E'	Intestine'
Epra'	WT_Sample7'	127	E'	Intestine'
MSpaapa'	WT_Sample7'	127	MS'	Unspecified'
ABarppapp'	WT_Sample7'	128	AB'	Skin'
Cpppa'	WT_Sample7'	128	C'	Muscle'
Cpppp'	WT_Sample7'	128	C'	Muscle'
Dpa'	WT_Sample7'	128	D'	Muscle'
Epra'	WT_Sample7'	128	E'	Intestine'
ABarppaaa'	WT_Sample7'	129	AB'	Unspecified'
ABprppaaa'	WT_Sample7'	129	AB'	Unspecified'
Caapp'	WT_Sample7'	129	C'	Unspecified'
Cpppa'	WT_Sample7'	129	C'	Muscle'
Dpa'	WT_Sample7'	129	D'	Muscle'
ABaraaaap'	WT_Sample7'	130	AB'	Unspecified'
ABarpaaap'	WT_Sample7'	130	AB'	Unspecified'
ABarppaaa'	WT_Sample7'	130	AB'	Unspecified'
Dpa'	WT_Sample7'	130	D'	Muscle'
MSaapap'	WT_Sample7'	130	MS'	Unspecified'
MSppapa'	WT_Sample7'	130	MS'	Unspecified'
Cppaa'	WT_Sample7'	131	C'	Muscle'
Dpa'	WT_Sample7'	131	D'	Muscle'
MSaapap'	WT_Sample7'	131	MS'	Unspecified'
MSapaaa'	WT_Sample7'	131	MS'	Unspecified'
Cppaa'	WT_Sample7'	132	C'	Muscle'
Dpa'	WT_Sample7'	132	D'	Muscle'
Cappa'	WT_Sample7'	133	C'	Muscle'
Dpa'	WT_Sample7'	133	D'	Muscle'
Eprp'	WT_Sample7'	133	E'	Intestine'
MSppaaa'	WT_Sample7'	133	MS'	Unspecified'
Cappa'	WT_Sample7'	134	C'	Muscle'
Dpa'	WT_Sample7'	134	D'	Muscle'
Eprp'	WT_Sample7'	134	E'	Intestine'
MSppaaa'	WT_Sample7'	134	MS'	Unspecified'
Cappp'	WT_Sample7'	135	C'	Muscle'
Cppap'	WT_Sample7'	135	C'	Muscle'
Dpa'	WT_Sample7'	135	D'	Muscle'
Eplp'	WT_Sample7'	135	E'	Intestine'
Cappp'	WT_Sample7'	136	C'	Muscle'
Cppap'	WT_Sample7'	136	C'	Muscle'
Dpa'	WT_Sample7'	136	D'	Muscle'
MSppapp'	WT_Sample7'	136	MS'	Muscle'
Dpa'	WT_Sample7'	137	D'	Muscle'
MSapapp'	WT_Sample7'	137	MS'	Muscle'
MSppapp'	WT_Sample7'	137	MS'	Muscle'
Capaa'	WT_Sample7'	138	C'	Muscle'
Capap'	WT_Sample7'	138	C'	Muscle'
Dpa'	WT_Sample7'	138	D'	Muscle'
Capaa'	WT_Sample7'	139	C'	Muscle'
Capap'	WT_Sample7'	139	C'	Muscle'
Dpa'	WT_Sample7'	139	D'	Muscle'
Dpa'	WT_Sample7'	140	D'	Muscle'
Dpa'	WT_Sample7'	141	D'	Muscle'
Dpa'	WT_Sample7'	142	D'	Muscle'
MSppppa'	WT_Sample7'	142	MS'	Muscle'
Dpa'	WT_Sample7'	143	D'	Muscle'
MSapaap'	WT_Sample7'	143	MS'	Unspecified'
MSapppa'	WT_Sample7'	143	MS'	Muscle'
Dpa'	WT_Sample7'	144	D'	Muscle'
MSaaapp'	WT_Sample7'	144	MS'	Unspecified'
MSpappp'	WT_Sample7'	144	MS'	Muscle'
Dpa'	WT_Sample7'	145	D'	Muscle'
MSppppp'	WT_Sample7'	145	MS'	Muscle'
ABalpaapap'	WT_Sample7'	146	AB'	Pharynx'
Dpa'	WT_Sample7'	146	D'	Muscle'
MSapppp'	WT_Sample7'	146	MS'	Muscle'
ABpraaappp'	WT_Sample7'	147	AB'	Unspecified'
Dpa'	WT_Sample7'	147	D'	Muscle'
MSappaa'	WT_Sample7'	147	MS'	Other'
ABalpapppp'	WT_Sample7'	148	AB'	Pharynx'
Dpa'	WT_Sample7'	148	D'	Muscle'
Dppp'	WT_Sample7'	148	D'	Muscle'
MSpppaa'	WT_Sample7'	148	MS'	Unspecified'
ABaraaapap'	WT_Sample7'	149	AB'	Pharynx'
ABarapappp'	WT_Sample7'	149	AB'	Pharynx'
Dpa'	WT_Sample7'	149	D'	Muscle'
Dppp'	WT_Sample7'	149	D'	Muscle'
MSaappp'	WT_Sample7'	149	MS'	Muscle'
MSppaap'	WT_Sample7'	149	MS'	Unspecified'
ABaraapapa'	WT_Sample7'	150	AB'	Unspecified'
Dpa'	WT_Sample7'	150	D'	Muscle'
Dppp'	WT_Sample7'	150	D'	Muscle'
MSaappp'	WT_Sample7'	150	MS'	Muscle'
MSappap'	WT_Sample7'	150	MS'	Unspecified'
Dpa'	WT_Sample7'	151	D'	Muscle'
Dppa'	WT_Sample7'	151	D'	Muscle'
MSpppap'	WT_Sample7'	151	MS'	Unspecified'
Dpa'	WT_Sample7'	152	D'	Muscle'
Dppa'	WT_Sample7'	152	D'	Muscle'
ABaraapppa'	WT_Sample7'	153	AB'	Unspecified'
Dpa'	WT_Sample7'	153	D'	Muscle'
MSpaaaap'	WT_Sample7'	153	MS'	Pharynx'
ABalpappap'	WT_Sample7'	154	AB'	Pharynx'
ABaraapppa'	WT_Sample7'	154	AB'	Unspecified'
Daap'	WT_Sample7'	154	D'	Muscle'
Dapp'	WT_Sample7'	154	D'	Muscle'
Dpa'	WT_Sample7'	154	D'	Muscle'
MSaaaaap'	WT_Sample7'	154	MS'	Pharynx'
MSpaaapp'	WT_Sample7'	154	MS'	Pharynx'
ABprpppapa'	WT_Sample7'	155	AB'	Unspecified'
Daaa'	WT_Sample7'	155	D'	Muscle'
Dapa'	WT_Sample7'	155	D'	Muscle'
MSpaaapp'	WT_Sample7'	155	MS'	Pharynx'
MSpapaap'	WT_Sample7'	155	MS'	Unspecified'
ABprpppapa'	WT_Sample7'	156	AB'	Unspecified'
Daaa'	WT_Sample7'	156	D'	Muscle'
Dapa'	WT_Sample7'	156	D'	Muscle'
Dpaa'	WT_Sample7'	156	D'	Muscle'
MSaaapaa'	WT_Sample7'	156	MS'	Pharynx'
ABalpaapaa'	WT_Sample7'	157	AB'	Unspecified'
ABarapaapp'	WT_Sample7'	157	AB'	Pharynx'
ABplaapapp'	WT_Sample7'	157	AB'	Unspecified'
Dpaa'	WT_Sample7'	157	D'	Muscle'
MSpappa'	WT_Sample7'	157	MS'	Muscle'
ABalappppa'	WT_Sample7'	158	AB'	Unspecified'
ABaraappap'	WT_Sample7'	158	AB'	Pharynx'
ABplpppapa'	WT_Sample7'	158	AB'	Unspecified'
ABalapappa'	WT_Sample7'	159	AB'	Unspecified'
ABalapppap'	WT_Sample7'	159	AB'	Unspecified'
ABaraaapaa'	WT_Sample7'	159	AB'	Unspecified'
MSaapaap'	WT_Sample7'	159	MS'	Unspecified'
MSpapaaa'	WT_Sample7'	159	MS'	Pharynx'
ABalapppap'	WT_Sample7'	160	AB'	Unspecified'
ABalpppapp'	WT_Sample7'	160	AB'	Unspecified'
ABalpppppa'	WT_Sample7'	160	AB'	Neuron'
ABprpappaa'	WT_Sample7'	160	AB'	Neuron'
ABprpappap'	WT_Sample7'	160	AB'	Neuron'
MSaappa'	WT_Sample7'	160	MS'	Other'
ABalpppapp'	WT_Sample7'	161	AB'	Unspecified'
ABpraapapp'	WT_Sample7'	161	AB'	Unspecified'
Dpap'	WT_Sample7'	161	D'	Muscle'
MSaaapap'	WT_Sample7'	161	MS'	Pharynx'
MSaapaaa'	WT_Sample7'	161	MS'	Pharynx'
MSaappa'	WT_Sample7'	161	MS'	Other'
MSpaapap'	WT_Sample7'	161	MS'	Unspecified'
ABalpapaaa'	WT_Sample7'	162	AB'	Unspecified'
ABaraapaap'	WT_Sample7'	162	AB'	Pharynx'
ABarapapap'	WT_Sample7'	162	AB'	Unspecified'
MSaapaaa'	WT_Sample7'	162	MS'	Pharynx'
ABalaaapal'	WT_Sample7'	163	AB'	Neuron'
ABalaaappr'	WT_Sample7'	163	AB'	Neuron'
ABalppppap'	WT_Sample7'	163	AB'	Unspecified'
ABplaapaap'	WT_Sample7'	163	AB'	Neuron'
ABplpaaaap'	WT_Sample7'	163	AB'	Unspecified'
ABpraapaap'	WT_Sample7'	163	AB'	Neuron'
ABprpaaaap'	WT_Sample7'	163	AB'	Unspecified'
MSaaaapa'	WT_Sample7'	163	MS'	Pharynx'
ABalaaapal'	WT_Sample7'	164	AB'	Neuron'
ABalaapppp'	WT_Sample7'	164	AB'	Unspecified'
ABalppappp'	WT_Sample7'	164	AB'	Unspecified'
ABarappppp'	WT_Sample7'	164	AB'	Unspecified'
ABplpaappa'	WT_Sample7'	164	AB'	Neuron'
ABplpaappp'	WT_Sample7'	164	AB'	Unspecified'
ABprpapapa'	WT_Sample7'	164	AB'	Unspecified'
ABprpppppp'	WT_Sample7'	164	AB'	Unspecified'
MSpapapp'	WT_Sample7'	164	MS'	Unspecified'
ABalapaapp'	WT_Sample7'	165	AB'	Unspecified'
ABalapapap'	WT_Sample7'	165	AB'	Unspecified'
ABalappapp'	WT_Sample7'	165	AB'	Neuron'
ABalpapapp'	WT_Sample7'	165	AB'	Unspecified'
ABalpppapa'	WT_Sample7'	165	AB'	Neuron'
ABplpaaaaa'	WT_Sample7'	165	AB'	Neuron'
ABplpaaapp'	WT_Sample7'	165	AB'	Unspecified'
ABplppppap'	WT_Sample7'	165	AB'	Other'
ABprpapapp'	WT_Sample7'	165	AB'	Neuron'
ABprpapppp'	WT_Sample7'	165	AB'	Other'
ABprpppppp'	WT_Sample7'	165	AB'	Unspecified'
MSpapapp'	WT_Sample7'	165	MS'	Unspecified'
ABalapppaa'	WT_Sample7'	166	AB'	Neuron'
ABalpapapa'	WT_Sample7'	166	AB'	Unspecified'
ABalpapapp'	WT_Sample7'	166	AB'	Unspecified'
ABalppppaa'	WT_Sample7'	166	AB'	Unspecified'
ABplpaaapp'	WT_Sample7'	166	AB'	Unspecified'
ABplppaaaa'	WT_Sample7'	166	AB'	Unspecified'
ABpraaappa'	WT_Sample7'	166	AB'	Neuron'
ABprpaaaaa'	WT_Sample7'	166	AB'	Neuron'
ABprpaappp'	WT_Sample7'	166	AB'	Unspecified'
ABprpapppa'	WT_Sample7'	166	AB'	Neuron'
ABprpapppp'	WT_Sample7'	166	AB'	Other'
ABprppppaa'	WT_Sample7'	166	AB'	Unspecified'
ABalpaappp'	WT_Sample7'	167	AB'	Skin'
ABalppapap'	WT_Sample7'	167	AB'	Neuron'
ABarappppa'	WT_Sample7'	167	AB'	Neuron'
ABplpaaapp'	WT_Sample7'	167	AB'	Unspecified'
ABplppapaa'	WT_Sample7'	167	AB'	Neuron'
ABpraaappa'	WT_Sample7'	167	AB'	Neuron'
ABprpapppa'	WT_Sample7'	167	AB'	Neuron'
ABalpappaa'	WT_Sample7'	168	AB'	Unspecified'
ABalppappa'	WT_Sample7'	168	AB'	Neuron'
ABaraapaaa'	WT_Sample7'	168	AB'	Pharynx'
ABplapaaap'	WT_Sample7'	168	AB'	Neuron'
ABplpaapap'	WT_Sample7'	168	AB'	Unspecified'
ABplpapapa'	WT_Sample7'	168	AB'	Unspecified'
ABplpapppa'	WT_Sample7'	168	AB'	Other'
ABprppaaaa'	WT_Sample7'	168	AB'	Unspecified'
ABprppapaa'	WT_Sample7'	168	AB'	Neuron'
ABaraaappp'	WT_Sample7'	169	AB'	Skin'
ABarapapaa'	WT_Sample7'	169	AB'	Unspecified'
ABplapppap'	WT_Sample7'	169	AB'	Unspecified'
ABplpapapp'	WT_Sample7'	169	AB'	Neuron'
ABplpapppa'	WT_Sample7'	169	AB'	Other'
ABplppppaa'	WT_Sample7'	169	AB'	Unspecified'
ABplpppppp'	WT_Sample7'	169	AB'	Unspecified'
ABprpppaaa'	WT_Sample7'	169	AB'	Unspecified'
ABaraappaa'	WT_Sample7'	170	AB'	Pharynx'
ABarapppap'	WT_Sample7'	170	AB'	Neuron'
ABplpaapaa'	WT_Sample7'	170	AB'	Neuron'
ABplpapapp'	WT_Sample7'	170	AB'	Neuron'
ABprapaaap'	WT_Sample7'	170	AB'	Neuron'
ABalaapapp'	WT_Sample7'	171	AB'	Unspecified'
ABalppapaa'	WT_Sample7'	171	AB'	Neuron'
ABarapppap'	WT_Sample7'	171	AB'	Neuron'
ABplaapaaa'	WT_Sample7'	171	AB'	Unspecified'
ABplpaapaa'	WT_Sample7'	171	AB'	Neuron'
ABplpppaaa'	WT_Sample7'	171	AB'	Neuron'
ABprpaapaa'	WT_Sample7'	171	AB'	Neuron'
ABprpapaap'	WT_Sample7'	171	AB'	Neuron'
Cppppa'	WT_Sample7'	171	C'	Muscle'
MSaaaapp'	WT_Sample7'	171	MS'	Unspecified'
MSpaaapa'	WT_Sample7'	171	MS'	Pharynx'
ABalaappap'	WT_Sample7'	172	AB'	Neuron'
ABalpaaaaa'	WT_Sample7'	172	AB'	Pharynx'
ABalppaapp'	WT_Sample7'	172	AB'	Unspecified'
ABalppapaa'	WT_Sample7'	172	AB'	Neuron'
ABarapaaaa'	WT_Sample7'	172	AB'	Pharynx'
ABplpapppp'	WT_Sample7'	172	AB'	Unspecified'
ABpraaapap'	WT_Sample7'	172	AB'	Unspecified'
ABprpapaaa'	WT_Sample7'	172	AB'	Neuron'
ABprpppaap'	WT_Sample7'	172	AB'	Neuron'
ABalaappap'	WT_Sample7'	173	AB'	Neuron'
ABalapaaap'	WT_Sample7'	173	AB'	Neuron'
ABarapaaaa'	WT_Sample7'	173	AB'	Pharynx'
ABplppaapp'	WT_Sample7'	173	AB'	Neuron'
ABplppappa'	WT_Sample7'	173	AB'	Neuron'
ABpraaaapa'	WT_Sample7'	173	AB'	Neuron'
Caapa'	WT_Sample7'	173	C'	Unspecified'
ABalppaaap'	WT_Sample7'	174	AB'	Neuron'
ABalpppaaa'	WT_Sample7'	174	AB'	Neuron'
ABarapppaa'	WT_Sample7'	174	AB'	Neuron'
ABplppappa'	WT_Sample7'	174	AB'	Neuron'
ABplpppaap'	WT_Sample7'	174	AB'	Neuron'
ABpraapapa'	WT_Sample7'	174	AB'	Neuron'
ABprpppppa'	WT_Sample7'	174	AB'	Unspecified'
Cpppaa'	WT_Sample7'	174	C'	Muscle'
MSaapapp'	WT_Sample7'	174	MS'	Unspecified'
ABalpapaap'	WT_Sample7'	175	AB'	Unspecified'
ABplpapaap'	WT_Sample7'	175	AB'	Neuron'
ABprapaaaa'	WT_Sample7'	175	AB'	Unspecified'
ABprpppppa'	WT_Sample7'	175	AB'	Unspecified'
Cpppaa'	WT_Sample7'	175	C'	Muscle'
MSaapapp'	WT_Sample7'	175	MS'	Unspecified'
ABalpaappa'	WT_Sample7'	176	AB'	Skin'
ABarpapaaa'	WT_Sample7'	176	AB'	Unspecified'
ABplpapaaa'	WT_Sample7'	176	AB'	Neuron'
ABalaaapar'	WT_Sample7'	177	AB'	Unspecified'
ABalpaaaap'	WT_Sample7'	177	AB'	Unspecified'
ABpraaapaa'	WT_Sample7'	177	AB'	Unspecified'
ABprapppap'	WT_Sample7'	177	AB'	Unspecified'
ABprppaapa'	WT_Sample7'	177	AB'	Unspecified'
ABprppappa'	WT_Sample7'	177	AB'	Neuron'
ABarappaaa'	WT_Sample7'	178	AB'	Unspecified'
ABalaaaarr'	WT_Sample7'	179	AB'	Unspecified'
ABalaapppa'	WT_Sample7'	179	AB'	Unspecified'
ABplapappp'	WT_Sample7'	179	AB'	Unspecified'
MSpaaaaa'	WT_Sample7'	179	MS'	Unspecified'
ABaraaaaaa'	WT_Sample7'	180	AB'	Pharynx'
ABarappaap'	WT_Sample7'	180	AB'	Unspecified'
ABplppaapa'	WT_Sample7'	180	AB'	Unspecified'
ABplpppppa'	WT_Sample7'	180	AB'	Other'
ABpraaaaaa'	WT_Sample7'	180	AB'	Neuron'
ABarapaapa'	WT_Sample7'	181	AB'	Unspecified'
ABarappaap'	WT_Sample7'	181	AB'	Unspecified'
ABplpaaapa'	WT_Sample7'	181	AB'	Neuron'
ABplppappp'	WT_Sample7'	181	AB'	Neuron'
ABplpppppa'	WT_Sample7'	181	AB'	Other'
MSpaapaa'	WT_Sample7'	181	MS'	Unspecified'
ABalapaapa'	WT_Sample7'	182	AB'	Unspecified'
ABalappaap'	WT_Sample7'	183	AB'	Unspecified'
ABalpaaapp'	WT_Sample7'	183	AB'	Unspecified'
ABalpppaap'	WT_Sample7'	183	AB'	Unspecified'
ABarapaaap'	WT_Sample7'	183	AB'	Unspecified'
ABarapappa'	WT_Sample7'	183	AB'	Unspecified'
ABalaaaalp'	WT_Sample7'	184	AB'	Unspecified'
ABalaapaap'	WT_Sample7'	184	AB'	Unspecified'
ABalpaaapa'	WT_Sample7'	184	AB'	Unspecified'
Cppaaa'	WT_Sample7'	184	C'	Muscle'
Cpppap'	WT_Sample7'	184	C'	Muscle'
ABplaaaaaa'	WT_Sample7'	185	AB'	Unspecified'
ABprppapap'	WT_Sample7'	185	AB'	Neuron'
ABarpaaaap'	WT_Sample7'	186	AB'	Neuron'
ABprppappp'	WT_Sample7'	186	AB'	Neuron'
Capppa'	WT_Sample7'	186	C'	Muscle'
ABpraaaaap'	WT_Sample7'	187	AB'	Unspecified'
Cappap'	WT_Sample7'	187	C'	Muscle'
Capppa'	WT_Sample7'	187	C'	Muscle'
Cppppp'	WT_Sample7'	187	C'	Muscle'
ABarpaaapa'	WT_Sample7'	188	AB'	Neuron'
Capaaa'	WT_Sample7'	188	C'	Muscle'
Cppapa'	WT_Sample7'	188	C'	Muscle'
Cppppp'	WT_Sample7'	188	C'	Muscle'
ABarpaaaaa'	WT_Sample7'	189	AB'	Neuron'
Cppppp'	WT_Sample7'	189	C'	Muscle'
Cppaap'	WT_Sample7'	190	C'	Muscle'
Capppp'	WT_Sample7'	192	C'	Muscle'
ABalaapaaa'	WT_Sample7'	193	AB'	Unspecified'
ABprapppaa'	WT_Sample7'	193	AB'	Unspecified'
MSpapapa'	WT_Sample7'	194	MS'	Unspecified'
Capapa'	WT_Sample7'	195	C'	Muscle'
MSpapapa'	WT_Sample7'	195	MS'	Unspecified'
Capapp'	WT_Sample7'	196	C'	Muscle'
Cppapp'	WT_Sample7'	196	C'	Muscle'
Capapp'	WT_Sample7'	197	C'	Muscle'
ABpraaapppp'	WT_Sample7'	199	AB'	Neuron'
Capaap'	WT_Sample7'	199	C'	Muscle'
ABalapaaaa'	WT_Sample7'	201	AB'	Unspecified'
Dpppa'	WT_Sample7'	202	D'	Muscle'
Dpppa'	WT_Sample7'	203	D'	Muscle'
Dpppa'	WT_Sample7'	204	D'	Muscle'
ABaraappaa'	WT_Sample7'	205	AB'	Pharynx'
AB'	WT_Sample1'	2	AB'	Unspecified'
AB'	WT_Sample1'	3	AB'	Unspecified'
P1'	WT_Sample1'	5	/'	Unspecified'
ABa'	WT_Sample1'	12	AB'	Unspecified'
ABp'	WT_Sample1'	12	AB'	Unspecified'
ABa'	WT_Sample1'	13	AB'	Unspecified'
ABp'	WT_Sample1'	13	AB'	Unspecified'
EMS'	WT_Sample1'	15	/'	Unspecified'
EMS'	WT_Sample1'	16	/'	Unspecified'
EMS'	WT_Sample1'	17	/'	Unspecified'
P2'	WT_Sample1'	18	/'	Unspecified'
ABal'	WT_Sample1'	23	AB'	Unspecified'
ABar'	WT_Sample1'	23	AB'	Unspecified'
ABpl'	WT_Sample1'	23	AB'	Unspecified'
ABpr'	WT_Sample1'	23	AB'	Unspecified'
ABar'	WT_Sample1'	24	AB'	Unspecified'
ABpl'	WT_Sample1'	24	AB'	Unspecified'
ABpr'	WT_Sample1'	24	AB'	Unspecified'
ABar'	WT_Sample1'	25	AB'	Unspecified'
MS'	WT_Sample1'	28	MS'	Unspecified'
E'	WT_Sample1'	29	E'	Intestine'
MS'	WT_Sample1'	29	MS'	Unspecified'
E'	WT_Sample1'	30	E'	Intestine'
C'	WT_Sample1'	31	C'	Unspecified'
C'	WT_Sample1'	32	C'	Unspecified'
ABala'	WT_Sample1'	35	AB'	Unspecified'
ABalp'	WT_Sample1'	35	AB'	Unspecified'
ABara'	WT_Sample1'	35	AB'	Unspecified'
ABarp'	WT_Sample1'	35	AB'	Unspecified'
ABpla'	WT_Sample1'	35	AB'	Unspecified'
ABpra'	WT_Sample1'	35	AB'	Unspecified'
ABpla'	WT_Sample1'	36	AB'	Unspecified'
ABplp'	WT_Sample1'	36	AB'	Unspecified'
ABpra'	WT_Sample1'	36	AB'	Unspecified'
ABprp'	WT_Sample1'	36	AB'	Unspecified'
P3'	WT_Sample1'	36	/'	Unspecified'
ABpla'	WT_Sample1'	37	AB'	Unspecified'
MSa'	WT_Sample1'	43	MS'	Unspecified'
MSp'	WT_Sample1'	43	MS'	Unspecified'
MSa'	WT_Sample1'	44	MS'	Unspecified'
MSp'	WT_Sample1'	44	MS'	Unspecified'
MSa'	WT_Sample1'	45	MS'	Unspecified'
Cp'	WT_Sample1'	48	C'	Unspecified'
Ca'	WT_Sample1'	49	C'	Unspecified'
Ca'	WT_Sample1'	50	C'	Unspecified'
ABalaa'	WT_Sample1'	52	AB'	Unspecified'
ABaraa'	WT_Sample1'	52	AB'	Unspecified'
ABarap'	WT_Sample1'	52	AB'	Unspecified'
ABplaa'	WT_Sample1'	52	AB'	Unspecified'
ABplap'	WT_Sample1'	52	AB'	Unspecified'
ABalaa'	WT_Sample1'	53	AB'	Unspecified'
ABalap'	WT_Sample1'	53	AB'	Unspecified'
ABalpa'	WT_Sample1'	53	AB'	Unspecified'
ABalpp'	WT_Sample1'	53	AB'	Unspecified'
ABaraa'	WT_Sample1'	53	AB'	Unspecified'
ABarpp'	WT_Sample1'	53	AB'	Unspecified'
ABplap'	WT_Sample1'	53	AB'	Unspecified'
ABplpa'	WT_Sample1'	53	AB'	Unspecified'
ABpraa'	WT_Sample1'	53	AB'	Unspecified'
ABprap'	WT_Sample1'	53	AB'	Unspecified'
ABprpp'	WT_Sample1'	53	AB'	Unspecified'
ABalpa'	WT_Sample1'	54	AB'	Unspecified'
ABalpp'	WT_Sample1'	54	AB'	Unspecified'
ABarpa'	WT_Sample1'	54	AB'	Unspecified'
ABarpp'	WT_Sample1'	54	AB'	Unspecified'
ABplpa'	WT_Sample1'	54	AB'	Unspecified'
ABplpp'	WT_Sample1'	54	AB'	Unspecified'
ABpraa'	WT_Sample1'	54	AB'	Unspecified'
ABprpa'	WT_Sample1'	54	AB'	Unspecified'
ABprpp'	WT_Sample1'	54	AB'	Unspecified'
ABplpp'	WT_Sample1'	55	AB'	Unspecified'
Ea'	WT_Sample1'	56	E'	Intestine'
Ea'	WT_Sample1'	57	E'	Intestine'
Ep'	WT_Sample1'	58	E'	Intestine'
Ep'	WT_Sample1'	59	E'	Intestine'
Ep'	WT_Sample1'	60	E'	Intestine'
D'	WT_Sample1'	61	D'	Muscle'
MSaa'	WT_Sample1'	61	MS'	Unspecified'
MSpa'	WT_Sample1'	61	MS'	Unspecified'
MSaa'	WT_Sample1'	62	MS'	Unspecified'
MSap'	WT_Sample1'	62	MS'	Unspecified'
MSpa'	WT_Sample1'	62	MS'	Unspecified'
MSap'	WT_Sample1'	63	MS'	Unspecified'
MSpp'	WT_Sample1'	63	MS'	Unspecified'
MSap'	WT_Sample1'	64	MS'	Unspecified'
Caa'	WT_Sample1'	70	C'	Unspecified'
Cpa'	WT_Sample1'	70	C'	Skin'
ABaraap'	WT_Sample1'	71	AB'	Unspecified'
ABplaaa'	WT_Sample1'	71	AB'	Unspecified'
ABplaap'	WT_Sample1'	71	AB'	Unspecified'
ABplapa'	WT_Sample1'	71	AB'	Unspecified'
Caa'	WT_Sample1'	71	C'	Unspecified'
ABalapa'	WT_Sample1'	72	AB'	Unspecified'
ABalapp'	WT_Sample1'	72	AB'	Unspecified'
ABalpap'	WT_Sample1'	72	AB'	Unspecified'
ABalppp'	WT_Sample1'	72	AB'	Unspecified'
ABaraaa'	WT_Sample1'	72	AB'	Unspecified'
ABarapa'	WT_Sample1'	72	AB'	Unspecified'
ABarapp'	WT_Sample1'	72	AB'	Unspecified'
ABarpaa'	WT_Sample1'	72	AB'	Unspecified'
ABarpap'	WT_Sample1'	72	AB'	Unspecified'
ABarppa'	WT_Sample1'	72	AB'	Unspecified'
ABarppp'	WT_Sample1'	72	AB'	Unspecified'
ABplaaa'	WT_Sample1'	72	AB'	Unspecified'
ABplapp'	WT_Sample1'	72	AB'	Unspecified'
ABpraap'	WT_Sample1'	72	AB'	Unspecified'
ABprapa'	WT_Sample1'	72	AB'	Unspecified'
ABprapp'	WT_Sample1'	72	AB'	Unspecified'
Cpp'	WT_Sample1'	72	C'	Muscle'
ABalaaa'	WT_Sample1'	73	AB'	Unspecified'
ABalaap'	WT_Sample1'	73	AB'	Unspecified'
ABalapa'	WT_Sample1'	73	AB'	Unspecified'
ABalapp'	WT_Sample1'	73	AB'	Unspecified'
ABalpaa'	WT_Sample1'	73	AB'	Unspecified'
ABalppa'	WT_Sample1'	73	AB'	Unspecified'
ABalppp'	WT_Sample1'	73	AB'	Unspecified'
ABarppp'	WT_Sample1'	73	AB'	Unspecified'
ABplapp'	WT_Sample1'	73	AB'	Unspecified'
ABplpaa'	WT_Sample1'	73	AB'	Unspecified'
ABplpap'	WT_Sample1'	73	AB'	Unspecified'
ABpraaa'	WT_Sample1'	73	AB'	Unspecified'
ABprpap'	WT_Sample1'	73	AB'	Unspecified'
ABprppp'	WT_Sample1'	73	AB'	Unspecified'
ABalaap'	WT_Sample1'	74	AB'	Unspecified'
ABalapp'	WT_Sample1'	74	AB'	Unspecified'
ABalppa'	WT_Sample1'	74	AB'	Unspecified'
ABplpap'	WT_Sample1'	74	AB'	Unspecified'
ABplppp'	WT_Sample1'	74	AB'	Unspecified'
ABprpaa'	WT_Sample1'	74	AB'	Unspecified'
ABprpap'	WT_Sample1'	74	AB'	Unspecified'
ABprppp'	WT_Sample1'	74	AB'	Unspecified'
Cap'	WT_Sample1'	74	C'	Muscle'
ABplppa'	WT_Sample1'	75	AB'	Unspecified'
ABprppa'	WT_Sample1'	75	AB'	Unspecified'
MSaaa'	WT_Sample1'	82	MS'	Unspecified'
MSaap'	WT_Sample1'	82	MS'	Unspecified'
MSpaa'	WT_Sample1'	82	MS'	Unspecified'
MSpap'	WT_Sample1'	82	MS'	Unspecified'
MSapa'	WT_Sample1'	83	MS'	Unspecified'
MSapp'	WT_Sample1'	83	MS'	Unspecified'
MSpap'	WT_Sample1'	83	MS'	Unspecified'
MSapa'	WT_Sample1'	84	MS'	Unspecified'
MSapp'	WT_Sample1'	84	MS'	Unspecified'
MSppa'	WT_Sample1'	84	MS'	Unspecified'
MSppp'	WT_Sample1'	84	MS'	Unspecified'
MSapa'	WT_Sample1'	85	MS'	Unspecified'
MSapp'	WT_Sample1'	85	MS'	Unspecified'
MSppa'	WT_Sample1'	85	MS'	Unspecified'
MSppp'	WT_Sample1'	85	MS'	Unspecified'
P4'	WT_Sample1'	85	/'	Germ Cell'
P4'	WT_Sample1'	86	/'	Germ Cell'
Eal'	WT_Sample1'	88	E'	Intestine'
Da'	WT_Sample1'	89	D'	Muscle'
Eal'	WT_Sample1'	89	E'	Intestine'
Ear'	WT_Sample1'	89	E'	Intestine'
Da'	WT_Sample1'	90	D'	Muscle'
Eal'	WT_Sample1'	90	E'	Intestine'
Ear'	WT_Sample1'	90	E'	Intestine'
Epl'	WT_Sample1'	90	E'	Intestine'
Epr'	WT_Sample1'	90	E'	Intestine'
Da'	WT_Sample1'	91	D'	Muscle'
Dp'	WT_Sample1'	91	D'	Muscle'
Epl'	WT_Sample1'	91	E'	Intestine'
Epr'	WT_Sample1'	91	E'	Intestine'
Dp'	WT_Sample1'	92	D'	Muscle'
ABalpapp'	WT_Sample1'	94	AB'	Unspecified'
ABaraapa'	WT_Sample1'	94	AB'	Unspecified'
ABaraapp'	WT_Sample1'	94	AB'	Unspecified'
ABarapap'	WT_Sample1'	94	AB'	Unspecified'
ABarpaap'	WT_Sample1'	94	AB'	Skin'
ABplaapa'	WT_Sample1'	94	AB'	Unspecified'
ABplaapp'	WT_Sample1'	94	AB'	Skin'
ABplapap'	WT_Sample1'	94	AB'	Unspecified'
Cpaa'	WT_Sample1'	94	C'	Skin'
ABalpaap'	WT_Sample1'	95	AB'	Unspecified'
ABalpppp'	WT_Sample1'	95	AB'	Unspecified'
ABaraaap'	WT_Sample1'	95	AB'	Unspecified'
ABarapap'	WT_Sample1'	95	AB'	Unspecified'
ABplaaaa'	WT_Sample1'	95	AB'	Unspecified'
ABplaapa'	WT_Sample1'	95	AB'	Unspecified'
ABplaapp'	WT_Sample1'	95	AB'	Skin'
ABplapap'	WT_Sample1'	95	AB'	Unspecified'
ABpraapp'	WT_Sample1'	95	AB'	Skin'
Caaa'	WT_Sample1'	95	C'	Skin'
Cpap'	WT_Sample1'	95	C'	Skin'
ABalappp'	WT_Sample1'	96	AB'	Unspecified'
ABalpaap'	WT_Sample1'	96	AB'	Unspecified'
ABalpapa'	WT_Sample1'	96	AB'	Unspecified'
ABalpppa'	WT_Sample1'	96	AB'	Unspecified'
ABalpppp'	WT_Sample1'	96	AB'	Unspecified'
ABarapaa'	WT_Sample1'	96	AB'	Unspecified'
ABarappp'	WT_Sample1'	96	AB'	Unspecified'
ABplaaaa'	WT_Sample1'	96	AB'	Unspecified'
ABplaaap'	WT_Sample1'	96	AB'	Skin'
ABplpaaa'	WT_Sample1'	96	AB'	Unspecified'
ABplpaap'	WT_Sample1'	96	AB'	Unspecified'
ABplpapp'	WT_Sample1'	96	AB'	Unspecified'
ABpraaap'	WT_Sample1'	96	AB'	Unspecified'
ABpraapa'	WT_Sample1'	96	AB'	Unspecified'
ABprapap'	WT_Sample1'	96	AB'	Unspecified'
ABprpapp'	WT_Sample1'	96	AB'	Unspecified'
Caaa'	WT_Sample1'	96	C'	Skin'
ABalapap'	WT_Sample1'	97	AB'	Unspecified'
ABalappp'	WT_Sample1'	97	AB'	Unspecified'
ABalpppa'	WT_Sample1'	97	AB'	Unspecified'
ABarappp'	WT_Sample1'	97	AB'	Unspecified'
ABarpapa'	WT_Sample1'	97	AB'	Unspecified'
ABplaaaa'	WT_Sample1'	97	AB'	Unspecified'
ABplaaap'	WT_Sample1'	97	AB'	Skin'
ABplapaa'	WT_Sample1'	97	AB'	Unspecified'
ABplappa'	WT_Sample1'	97	AB'	Skin'
ABplpaaa'	WT_Sample1'	97	AB'	Unspecified'
ABplpapa'	WT_Sample1'	97	AB'	Unspecified'
ABplpppp'	WT_Sample1'	97	AB'	Unspecified'
ABpraaap'	WT_Sample1'	97	AB'	Unspecified'
ABpraapa'	WT_Sample1'	97	AB'	Unspecified'
ABprpapa'	WT_Sample1'	97	AB'	Unspecified'
ABprpppa'	WT_Sample1'	97	AB'	Unspecified'
ABprpppp'	WT_Sample1'	97	AB'	Unspecified'
ABalaapp'	WT_Sample1'	98	AB'	Unspecified'
ABaraaaa'	WT_Sample1'	98	AB'	Unspecified'
ABarappa'	WT_Sample1'	98	AB'	Unspecified'
ABarpapp'	WT_Sample1'	98	AB'	Skin'
ABarpppa'	WT_Sample1'	98	AB'	Unspecified'
ABplapaa'	WT_Sample1'	98	AB'	Unspecified'
ABplappa'	WT_Sample1'	98	AB'	Skin'
ABplpppa'	WT_Sample1'	98	AB'	Unspecified'
ABplpppp'	WT_Sample1'	98	AB'	Unspecified'
ABprappa'	WT_Sample1'	98	AB'	Skin'
ABprpaaa'	WT_Sample1'	98	AB'	Unspecified'
ABprpaap'	WT_Sample1'	98	AB'	Unspecified'
ABprpppa'	WT_Sample1'	98	AB'	Unspecified'
ABprpppp'	WT_Sample1'	98	AB'	Unspecified'
ABalappa'	WT_Sample1'	99	AB'	Unspecified'
ABarpaaa'	WT_Sample1'	99	AB'	Unspecified'
ABarppaa'	WT_Sample1'	99	AB'	Unspecified'
ABplappp'	WT_Sample1'	99	AB'	Unspecified'
ABplppap'	WT_Sample1'	99	AB'	Neuron'
ABpraaaa'	WT_Sample1'	99	AB'	Unspecified'
ABalaapa'	WT_Sample1'	100	AB'	Unspecified'
ABalppaa'	WT_Sample1'	100	AB'	Unspecified'
ABarpaaa'	WT_Sample1'	100	AB'	Unspecified'
ABarppap'	WT_Sample1'	100	AB'	Skin'
ABarpppp'	WT_Sample1'	100	AB'	Skin'
ABplppap'	WT_Sample1'	100	AB'	Neuron'
ABprappp'	WT_Sample1'	100	AB'	Unspecified'
ABprppap'	WT_Sample1'	100	AB'	Neuron'
ABalaaaa'	WT_Sample1'	101	AB'	Unspecified'
ABalppaa'	WT_Sample1'	101	AB'	Unspecified'
ABarppap'	WT_Sample1'	101	AB'	Skin'
ABplppaa'	WT_Sample1'	101	AB'	Unspecified'
Caap'	WT_Sample1'	101	C'	Unspecified'
Cppp'	WT_Sample1'	101	C'	Muscle'
ABplppaa'	WT_Sample1'	102	AB'	Unspecified'
ABprppaa'	WT_Sample1'	103	AB'	Unspecified'
MSaaaa'	WT_Sample1'	104	MS'	Unspecified'
MSaapa'	WT_Sample1'	104	MS'	Unspecified'
MSpaaa'	WT_Sample1'	104	MS'	Unspecified'
MSaaaa'	WT_Sample1'	105	MS'	Unspecified'
MSaapa'	WT_Sample1'	105	MS'	Unspecified'
MSpaaa'	WT_Sample1'	105	MS'	Unspecified'
MSpapa'	WT_Sample1'	105	MS'	Unspecified'
MSaaap'	WT_Sample1'	106	MS'	Unspecified'
MSpapa'	WT_Sample1'	106	MS'	Unspecified'
Cppa'	WT_Sample1'	107	C'	Muscle'
Cppa'	WT_Sample1'	108	C'	Muscle'
MSapaa'	WT_Sample1'	108	MS'	Unspecified'
MSapap'	WT_Sample1'	108	MS'	Unspecified'
MSpaap'	WT_Sample1'	108	MS'	Unspecified'
Capa'	WT_Sample1'	109	C'	Muscle'
MSaapp'	WT_Sample1'	109	MS'	Unspecified'
MSpaap'	WT_Sample1'	109	MS'	Unspecified'
MSpapp'	WT_Sample1'	109	MS'	Muscle'
MSpaap'	WT_Sample1'	110	MS'	Unspecified'
MSppaa'	WT_Sample1'	110	MS'	Unspecified'
MSppap'	WT_Sample1'	110	MS'	Unspecified'
MSppap'	WT_Sample1'	111	MS'	Unspecified'
MSpppa'	WT_Sample1'	113	MS'	Unspecified'
MSappa'	WT_Sample1'	114	MS'	Unspecified'
MSappp'	WT_Sample1'	114	MS'	Muscle'
MSpppa'	WT_Sample1'	114	MS'	Unspecified'
MSpppp'	WT_Sample1'	114	MS'	Muscle'
MSappp'	WT_Sample1'	115	MS'	Muscle'
MSappp'	WT_Sample1'	116	MS'	Muscle'
Dap'	WT_Sample1'	117	D'	Muscle'
Dap'	WT_Sample1'	118	D'	Muscle'
Dpp'	WT_Sample1'	120	D'	Muscle'
ABalpappa'	WT_Sample1'	121	AB'	Unspecified'
ABalpappp'	WT_Sample1'	121	AB'	Unspecified'
ABalppppp'	WT_Sample1'	121	AB'	Unspecified'
Dpp'	WT_Sample1'	121	D'	Muscle'
ABalpaapa'	WT_Sample1'	122	AB'	Unspecified'
ABalpappa'	WT_Sample1'	122	AB'	Unspecified'
Daa'	WT_Sample1'	122	D'	Muscle'
Dpa'	WT_Sample1'	122	D'	Muscle'
ABaraaapa'	WT_Sample1'	123	AB'	Unspecified'
ABarapapp'	WT_Sample1'	123	AB'	Unspecified'
ABplapapp'	WT_Sample1'	123	AB'	Unspecified'
Daa'	WT_Sample1'	123	D'	Muscle'
Dpa'	WT_Sample1'	123	D'	Muscle'
ABarapapa'	WT_Sample1'	124	AB'	Unspecified'
ABarpaapp'	WT_Sample1'	124	AB'	Skin'
ABplaappp'	WT_Sample1'	124	AB'	Skin'
ABpraaapp'	WT_Sample1'	124	AB'	Unspecified'
Daa'	WT_Sample1'	124	D'	Muscle'
ABalppapp'	WT_Sample1'	125	AB'	Unspecified'
ABalpppap'	WT_Sample1'	125	AB'	Unspecified'
ABaraapap'	WT_Sample1'	125	AB'	Unspecified'
ABarapapa'	WT_Sample1'	125	AB'	Unspecified'
ABarpaapa'	WT_Sample1'	125	AB'	Skin'
ABarpaapp'	WT_Sample1'	125	AB'	Skin'
ABplpappa'	WT_Sample1'	125	AB'	Unspecified'
ABpraappp'	WT_Sample1'	125	AB'	Skin'
Daa'	WT_Sample1'	125	D'	Muscle'
ABalapppa'	WT_Sample1'	126	AB'	Unspecified'
ABalapppp'	WT_Sample1'	126	AB'	Unspecified'
ABalpapap'	WT_Sample1'	126	AB'	Unspecified'
ABalppapp'	WT_Sample1'	126	AB'	Unspecified'
ABalpppap'	WT_Sample1'	126	AB'	Unspecified'
ABalppppa'	WT_Sample1'	126	AB'	Unspecified'
ABaraapaa'	WT_Sample1'	126	AB'	Pharynx'
ABaraappp'	WT_Sample1'	126	AB'	Unspecified'
ABarapaap'	WT_Sample1'	126	AB'	Unspecified'
ABplaapap'	WT_Sample1'	126	AB'	Unspecified'
ABplapapa'	WT_Sample1'	126	AB'	Unspecified'
ABprapapa'	WT_Sample1'	126	AB'	Unspecified'
Caaap'	WT_Sample1'	126	C'	Skin'
Cpaap'	WT_Sample1'	126	C'	Skin'
Daa'	WT_Sample1'	126	D'	Muscle'
ABalpapaa'	WT_Sample1'	127	AB'	Unspecified'
ABalppapa'	WT_Sample1'	127	AB'	Neuron'
ABalpppap'	WT_Sample1'	127	AB'	Unspecified'
ABalppppa'	WT_Sample1'	127	AB'	Unspecified'
ABarapppp'	WT_Sample1'	127	AB'	Unspecified'
ABplaaapp'	WT_Sample1'	127	AB'	Skin'
ABplaapaa'	WT_Sample1'	127	AB'	Unspecified'
ABplaapap'	WT_Sample1'	127	AB'	Unspecified'
ABplpaapp'	WT_Sample1'	127	AB'	Unspecified'
ABprpappa'	WT_Sample1'	127	AB'	Neuron'
Cpaaa'	WT_Sample1'	127	C'	Skin'
Daa'	WT_Sample1'	127	D'	Muscle'
ABalaaapa'	WT_Sample1'	128	AB'	Unspecified'
ABalaaapp'	WT_Sample1'	128	AB'	Unspecified'
ABalpaapp'	WT_Sample1'	128	AB'	Skin'
ABalpapaa'	WT_Sample1'	128	AB'	Unspecified'
ABarapppa'	WT_Sample1'	128	AB'	Neuron'
ABarapppp'	WT_Sample1'	128	AB'	Unspecified'
ABarpapap'	WT_Sample1'	128	AB'	Skin'
ABplaaaap'	WT_Sample1'	128	AB'	Skin'
ABplaappa'	WT_Sample1'	128	AB'	Skin'
ABplpaaaa'	WT_Sample1'	128	AB'	Unspecified'
ABplppppa'	WT_Sample1'	128	AB'	Unspecified'
ABpraapap'	WT_Sample1'	128	AB'	Unspecified'
ABprapapp'	WT_Sample1'	128	AB'	Unspecified'
ABprpappa'	WT_Sample1'	128	AB'	Neuron'
ABprppppa'	WT_Sample1'	128	AB'	Unspecified'
Caaaa'	WT_Sample1'	128	C'	Skin'
Daa'	WT_Sample1'	128	D'	Muscle'
ABalaappp'	WT_Sample1'	129	AB'	Unspecified'
ABalpppaa'	WT_Sample1'	129	AB'	Unspecified'
ABarapppa'	WT_Sample1'	129	AB'	Neuron'
ABarpapaa'	WT_Sample1'	129	AB'	Unspecified'
ABarpapap'	WT_Sample1'	129	AB'	Skin'
ABarpappp'	WT_Sample1'	129	AB'	Skin'
ABplaaapa'	WT_Sample1'	129	AB'	Skin'
ABplaappa'	WT_Sample1'	129	AB'	Skin'
ABplappap'	WT_Sample1'	129	AB'	Skin'
ABplpaaaa'	WT_Sample1'	129	AB'	Unspecified'
ABplpaaap'	WT_Sample1'	129	AB'	Unspecified'
ABplpaapa'	WT_Sample1'	129	AB'	Unspecified'
ABplpapap'	WT_Sample1'	129	AB'	Unspecified'
ABplppppa'	WT_Sample1'	129	AB'	Unspecified'
ABprpaaaa'	WT_Sample1'	129	AB'	Unspecified'
ABprpappp'	WT_Sample1'	129	AB'	Unspecified'
Daa'	WT_Sample1'	129	D'	Muscle'
ABalapaap'	WT_Sample1'	130	AB'	Unspecified'
ABalappap'	WT_Sample1'	130	AB'	Unspecified'
ABarappap'	WT_Sample1'	130	AB'	Unspecified'
ABarapppa'	WT_Sample1'	130	AB'	Neuron'
ABplaaaaa'	WT_Sample1'	130	AB'	Unspecified'
ABplappaa'	WT_Sample1'	130	AB'	Skin'
ABplpaaap'	WT_Sample1'	130	AB'	Unspecified'
ABplpapaa'	WT_Sample1'	130	AB'	Neuron'
ABplpppaa'	WT_Sample1'	130	AB'	Neuron'
ABplppppp'	WT_Sample1'	130	AB'	Unspecified'
ABpraaapa'	WT_Sample1'	130	AB'	Unspecified'
ABpraappa'	WT_Sample1'	130	AB'	Skin'
ABprpaaap'	WT_Sample1'	130	AB'	Unspecified'
ABprpaapp'	WT_Sample1'	130	AB'	Unspecified'
ABprpapaa'	WT_Sample1'	130	AB'	Neuron'
ABprpapap'	WT_Sample1'	130	AB'	Unspecified'
ABprpappp'	WT_Sample1'	130	AB'	Unspecified'
ABprpppaa'	WT_Sample1'	130	AB'	Unspecified'
ABprppppp'	WT_Sample1'	130	AB'	Unspecified'
Daa'	WT_Sample1'	130	D'	Muscle'
ABalaappa'	WT_Sample1'	131	AB'	Unspecified'
ABalapaap'	WT_Sample1'	131	AB'	Unspecified'
ABarapaaa'	WT_Sample1'	131	AB'	Unspecified'
ABarpppap'	WT_Sample1'	131	AB'	Unspecified'
ABplaaaaa'	WT_Sample1'	131	AB'	Unspecified'
ABplapaap'	WT_Sample1'	131	AB'	Unspecified'
ABplppppp'	WT_Sample1'	131	AB'	Unspecified'
ABprappap'	WT_Sample1'	131	AB'	Skin'
ABprpaapa'	WT_Sample1'	131	AB'	Unspecified'
ABprpapaa'	WT_Sample1'	131	AB'	Neuron'
ABprpppaa'	WT_Sample1'	131	AB'	Unspecified'
ABprppppp'	WT_Sample1'	131	AB'	Unspecified'
Daa'	WT_Sample1'	131	D'	Muscle'
ABalapapa'	WT_Sample1'	132	AB'	Unspecified'
ABalpaaaa'	WT_Sample1'	132	AB'	Unspecified'
ABalpaaap'	WT_Sample1'	132	AB'	Unspecified'
ABaraaaaa'	WT_Sample1'	132	AB'	Pharynx'
ABarppaap'	WT_Sample1'	132	AB'	Unspecified'
ABplppapa'	WT_Sample1'	132	AB'	Neuron'
ABprapaaa'	WT_Sample1'	132	AB'	Unspecified'
ABprappaa'	WT_Sample1'	132	AB'	Skin'
Cpapa'	WT_Sample1'	132	C'	Skin'
Daa'	WT_Sample1'	132	D'	Muscle'
MSaaaaa'	WT_Sample1'	132	MS'	Unspecified'
MSaapaa'	WT_Sample1'	132	MS'	Unspecified'
MSpaaaa'	WT_Sample1'	132	MS'	Unspecified'
ABalppaap'	WT_Sample1'	133	AB'	Unspecified'
ABarpppaa'	WT_Sample1'	133	AB'	Unspecified'
ABarppppa'	WT_Sample1'	133	AB'	Skin'
ABplppaap'	WT_Sample1'	133	AB'	Unspecified'
Daa'	WT_Sample1'	133	D'	Muscle'
MSaaaaa'	WT_Sample1'	133	MS'	Unspecified'
MSpaaap'	WT_Sample1'	133	MS'	Pharynx'
MSpapaa'	WT_Sample1'	133	MS'	Unspecified'
ABalaaaal'	WT_Sample1'	134	AB'	Unspecified'
ABalaaaar'	WT_Sample1'	134	AB'	Unspecified'
ABalaapap'	WT_Sample1'	134	AB'	Unspecified'
ABalppaaa'	WT_Sample1'	134	AB'	Unspecified'
ABarpappa'	WT_Sample1'	134	AB'	Skin'
ABarppppa'	WT_Sample1'	134	AB'	Skin'
ABplppaap'	WT_Sample1'	134	AB'	Unspecified'
ABplppapp'	WT_Sample1'	134	AB'	Neuron'
ABpraaaaa'	WT_Sample1'	134	AB'	Unspecified'
ABprapaap'	WT_Sample1'	134	AB'	Unspecified'
Cpapp'	WT_Sample1'	134	C'	Skin'
Daa'	WT_Sample1'	134	D'	Muscle'
MSaaaap'	WT_Sample1'	134	MS'	Unspecified'
MSaaapa'	WT_Sample1'	134	MS'	Pharynx'
ABalaapaa'	WT_Sample1'	135	AB'	Unspecified'
ABalappaa'	WT_Sample1'	135	AB'	Unspecified'
ABarpaaap'	WT_Sample1'	135	AB'	Unspecified'
ABarppaaa'	WT_Sample1'	135	AB'	Unspecified'
ABarppapa'	WT_Sample1'	135	AB'	Skin'
ABarppppp'	WT_Sample1'	135	AB'	Skin'
ABplapppa'	WT_Sample1'	135	AB'	Unspecified'
ABplapppp'	WT_Sample1'	135	AB'	Skin'
ABprapaap'	WT_Sample1'	135	AB'	Unspecified'
ABprapppa'	WT_Sample1'	135	AB'	Unspecified'
ABprapppp'	WT_Sample1'	135	AB'	Skin'
ABprppaap'	WT_Sample1'	135	AB'	Unspecified'
ABprppapp'	WT_Sample1'	135	AB'	Neuron'
Daa'	WT_Sample1'	135	D'	Muscle'
ABarppaaa'	WT_Sample1'	136	AB'	Unspecified'
ABarppapa'	WT_Sample1'	136	AB'	Skin'
ABarppapp'	WT_Sample1'	136	AB'	Skin'
Cpppa'	WT_Sample1'	136	C'	Muscle'
Daa'	WT_Sample1'	136	D'	Muscle'
ABplppaaa'	WT_Sample1'	137	AB'	Unspecified'
Cpppa'	WT_Sample1'	137	C'	Muscle'
Daa'	WT_Sample1'	137	D'	Muscle'
Eala'	WT_Sample1'	137	E'	Intestine'
Ealp'	WT_Sample1'	137	E'	Intestine'
MSaapap'	WT_Sample1'	137	MS'	Unspecified'
MSpaapa'	WT_Sample1'	137	MS'	Unspecified'
ABprppaaa'	WT_Sample1'	138	AB'	Unspecified'
Caapp'	WT_Sample1'	138	C'	Unspecified'
Cappa'	WT_Sample1'	138	C'	Muscle'
Cpppa'	WT_Sample1'	138	C'	Muscle'
Cpppp'	WT_Sample1'	138	C'	Muscle'
Daa'	WT_Sample1'	138	D'	Muscle'
Eala'	WT_Sample1'	138	E'	Intestine'
Ealp'	WT_Sample1'	138	E'	Intestine'
Epla'	WT_Sample1'	138	E'	Intestine'
MSpaapa'	WT_Sample1'	138	MS'	Unspecified'
Cappa'	WT_Sample1'	139	C'	Muscle'
Cpppp'	WT_Sample1'	139	C'	Muscle'
Daa'	WT_Sample1'	139	D'	Muscle'
Ealp'	WT_Sample1'	139	E'	Intestine'
Eara'	WT_Sample1'	139	E'	Intestine'
MSpapap'	WT_Sample1'	139	MS'	Unspecified'
Cpppp'	WT_Sample1'	140	C'	Muscle'
Daa'	WT_Sample1'	140	D'	Muscle'
Eara'	WT_Sample1'	140	E'	Intestine'
[truncated: 3,908 more rows]
