# Supplementary material for: Cell lineage-resolved embryonic morphological map reveals novel signaling regulating cell fate and size asymmetry
Source: Research Square preprint supplement (doi:10.21203/rs.3.rs-4664717/v1), 2024-08-30
Supplement: Supplementary file 19 [file Table S5.xlsx]

## Sheet: Table S
Definition	CShaper	CMap
Arbitrary standard for determining the terminal edited time point	Full production of AB256, MS32, E16, C16, D8, Z2/Z3 cells (with at least one time point for each)	Full production of C48 cells (with at least five time points for each)
Total time points from the four-cell stage to the terminal edited time point according to the arbitrary standard	136±4	201±19
Total cell number recorded at the terminal edited time point according to the arbitrary standard	357±3	581±5
Total cell number with a complete lifespan in all embryo samples according to the arbitrary standard	322	589
Total cell number recorded with at least one time point in one embryo sample	722	1292
Total cell number recorded with at least one time point in all embryo samples	690	1190
Apoptotic cell number recorded with at least one time point in one embryo sample	16/113	104/113
Apoptotic cell number recorded with at least one time point in all embryo samples	14/113	79/113
Note 1: The actual terminal edited time point in CMap dataset might be a bit later than the one determined by the arbitrary standard, for specific usage such as the study of intestine morphogenesis.
