# Supplementary material for: Cell lineage-resolved embryonic morphological map reveals novel signaling regulating cell fate and size asymmetry
Source: Research Square preprint supplement (doi:10.21203/rs.3.rs-4664717/v1), 2024-08-30
Supplement: Supplementary file 21 [file Table S6.xlsx]

## Sheet: WT_Sample1
Cell identity c	Embryo sample j	Time point T	Segmentation failure (1) or not (empty)	Quality failure (value) or not (empty)						Manually annotated apoptotic cell (1) or not (empty)
				V (μm3)	CPR	VIR	VVR	SR	FRL
Z3	WT_Sample1	214		3.0385		0.9409	0.9762
Z3	WT_Sample1	216		3.5459			0.9722
Z3	WT_Sample1	217		4.2749		0.8362	0.9665
Eplap	WT_Sample1	237		2.187	0.459	0.9767	0.9796
Eplpp	WT_Sample1	198		2.3561		1.0549	0.9817
ABalapaap	WT_Sample1	97		3.1493		0.9805	0.9537
MSaappa	WT_Sample1	121		2.5894		0.7482	0.9257
MSpaapp	WT_Sample1	126		2.3445		1.1214	0.8303			1
MSpaapp	WT_Sample1	128		2.397			0.8265			1
MSpaapp	WT_Sample1	129		2.2103			0.84			1
MSpaapp	WT_Sample1	130		2.327			0.8315			1
MSpaapp	WT_Sample1	131		2.3853			0.8273			1
MSpaapp	WT_Sample1	132		2.1928			0.8412			1
MSpaapp	WT_Sample1	133		2.2803			0.8349			1
MSpaapp	WT_Sample1	134		2.082			0.8493			1
MSpaapp	WT_Sample1	135		2.1462			0.8446			1
MSpaapp	WT_Sample1	136		2.1054			0.8476			1
MSpaapp	WT_Sample1	137		2.1928			0.8412			1
MSpaapp	WT_Sample1	138		2.5136			0.818			1
MSpaapp	WT_Sample1	139		2.2861			0.8345			1
MSpaapp	WT_Sample1	140		2.5486			0.8155			1
MSpaapp	WT_Sample1	141		2.3911			0.8269			1
MSpaapp	WT_Sample1	142		2.3503			0.8299			1
MSpaapp	WT_Sample1	143		2.1462		0.7342	0.8446			1
MSpaapp	WT_Sample1	145		3.435		0.7435	0.7513			1
MSpaapp	WT_Sample1	147		2.1637			0.8434			1
MSpaapp	WT_Sample1	148		2.1812			0.8421			1
MSpaapp	WT_Sample1	149		2.4378			0.8235			1
MSpaapp	WT_Sample1	150		2.2395			0.8379			1
MSpaapp	WT_Sample1	151		2.3911			0.8269			1
MSpaapp	WT_Sample1	152		2.187			0.8417			1
MSpaapp	WT_Sample1	153		2.5777			0.8134			1
MSpaapp	WT_Sample1	154		2.3561		1.9227	0.8294			1
MSpaapp	WT_Sample1	156		2.6477		1.183	0.8083			1
Caaaaa	WT_Sample1	219		3.4059	0.7187		0.9291
Caaaaa	WT_Sample1	223		3.8316	0.7297	0.696	0.9202
Caaaaa	WT_Sample1	237		3.9133	0.6472	0.7942	0.9185
Caapap	WT_Sample1	203		4.5198						1
Caapap	WT_Sample1	206		2.8518			0.5998			1
Caapap	WT_Sample1	207		2.4086			0.662			1
Caapap	WT_Sample1	208		3.9191		1.3519				1
Caapap	WT_Sample1	210		3.9658						1
Caapap	WT_Sample1	211		2.3386			0.6718			1
Caapap	WT_Sample1	212		2.7119			0.6195			1
Caapap	WT_Sample1	213		3.6625			0.4861			1
Caapap	WT_Sample1	214		2.6419			0.6293			1
Caapap	WT_Sample1	215		3.2951			0.5376			1
Caapap	WT_Sample1	216		3.1901			0.5524			1
Caapap	WT_Sample1	217		2.916			0.5908			1
Caapap	WT_Sample1	218		2.5194			0.6465			1
Caapap	WT_Sample1	219		2.6127		0.671	0.6334			1
Caapap	WT_Sample1	221		3.3242			0.5336			1
Caapap	WT_Sample1	222		2.706			0.6203			1
Caapap	WT_Sample1	223		3.0151			0.5769			1
Caapap	WT_Sample1	224		3.1784			0.554			1
Caapap	WT_Sample1	225		2.8635			0.5982			1
Caappd	WT_Sample1	146		4.3157	0.7653	1.1914	0.7184
Caappd	WT_Sample1	190		2.3386	0.8512		0.8474
Caappd	WT_Sample1	191		2.3153	0.8027	1.027	0.8489
Caappd	WT_Sample1	207		3.7208	0.6437	0.8836	0.7572
Caappd	WT_Sample1	239		3.1434	0.7485		0.7949
Caappd	WT_Sample1	245		2.6769	0.7821		0.8253
Caappd	WT_Sample1	246		2.4436	0.6308		0.8406
Caappd	WT_Sample1	247		2.6302	0.7019		0.8284
Caappd	WT_Sample1	255		3.8666	0.6618		0.7477
Caappv	WT_Sample1	186		4.1174	0.7993		0.6794
Cpaaaa	WT_Sample1	215		4.1291	0.9272		0.9341
Cpaaaa	WT_Sample1	216		2.7935	0.877		0.9554
Cpaaaa	WT_Sample1	217		2.916	0.8759		0.9535
Cpaaaa	WT_Sample1	218		2.4319	0.872		0.9612
Cpaaaa	WT_Sample1	219		2.5719	0.8901		0.959
Cpaaaa	WT_Sample1	220		2.7527	0.8844		0.9561
Cpaaaa	WT_Sample1	221		3.4817	0.8593		0.9445
Cpaaap	WT_Sample1	228		2.6711	0.9563		0.9552
Cpaaap	WT_Sample1	229		2.846	0.9487		0.9522
Cpapaa	WT_Sample1	228		2.1695	0.8444		0.9621
Cpapap	WT_Sample1	224		2.9685	0.9165		0.9445
Cpapap	WT_Sample1	225		2.8577	0.829		0.9466
Cpappd	WT_Sample1	208		2.6069	0.8295		0.9081
Cpappv	WT_Sample1	254		3.4934	0.7012		0.7656
Dpapp	WT_Sample1	222		3.9249			0.8886
Dpapp	WT_Sample1	231		4.3623			0.8762
Dpapp	WT_Sample1	233		3.9016			0.8893
ABalaaapar	WT_Sample1	154		3.3884		0.6868	0.8292
ABalaapapa	WT_Sample1	151		4.4848						1
ABalaapapa	WT_Sample1	153		3.6158						1
ABalaapapa	WT_Sample1	154		3.9016						1
ABalaapapa	WT_Sample1	155		3.3009						1
ABalaapapa	WT_Sample1	156		3.3534						1
ABalaapapa	WT_Sample1	157		3.6508						1
ABalaapapa	WT_Sample1	158		2.7877						1
ABalaapapa	WT_Sample1	159		2.811						1
ABalaapapa	WT_Sample1	160		3.0035						1
ABalaapapa	WT_Sample1	161		2.8577						1
ABalaapapa	WT_Sample1	162		4.3157						1
ABalaapapa	WT_Sample1	165		4.5023						1
ABalaapapa	WT_Sample1	169		3.0268						1
ABalaapapa	WT_Sample1	170		3.2193						1
ABalaapapa	WT_Sample1	171		3.0968						1
ABalaapapa	WT_Sample1	172		3.0618						1
ABalaapapa	WT_Sample1	173		3.6217						1
ABalaapapa	WT_Sample1	174		3.3884						1
ABalaapapa	WT_Sample1	175		3.2309						1
ABalaapapa	WT_Sample1	176		2.3561						1
ABalaapapa	WT_Sample1	177		2.9685						1
ABalaapapa	WT_Sample1	178		2.6186						1
ABalaapapa	WT_Sample1	179		2.4961						1
ABalaappaa	WT_Sample1	137		3.6683						1
ABalaappaa	WT_Sample1	138		3.4001						1
ABalaappaa	WT_Sample1	139		3.2659		0.7585				1
ABalaappaa	WT_Sample1	144		4.0066			0.5649			1
ABalaappaa	WT_Sample1	145		3.021						1
ABalaappaa	WT_Sample1	146		2.5428						1
ABalaappaa	WT_Sample1	147		2.7702		2.0797				1
ABalaappaa	WT_Sample1	149		2.7935						1
ABalaappaa	WT_Sample1	150		2.741						1
ABalaappaa	WT_Sample1	151		2.5602						1
ABalaappaa	WT_Sample1	152		2.5719						1
ABalaappaa	WT_Sample1	153		2.5486						1
ABalaappaa	WT_Sample1	154		2.5544						1
ABalaappaa	WT_Sample1	155		2.5602						1
ABalaappaa	WT_Sample1	156		2.5602						1
ABalaappaa	WT_Sample1	157		2.4903						1
ABalaappaa	WT_Sample1	158		2.4728						1
ABalaappaa	WT_Sample1	159		2.4261						1
ABalaappaa	WT_Sample1	160		2.397						1
ABalaappaa	WT_Sample1	161		2.5019						1
ABalaappaa	WT_Sample1	162		2.5894						1
ABalaappaa	WT_Sample1	163		2.4086						1
ABalaappaa	WT_Sample1	164		2.4786						1
ABalaappaa	WT_Sample1	165		2.7352						1
ABalaappaa	WT_Sample1	166		2.4086						1
ABalaappaa	WT_Sample1	167		2.7702	0.4981					1
ABalaappaa	WT_Sample1	168		2.4378						1
ABalaappaa	WT_Sample1	169		2.4203						1
ABalaappaa	WT_Sample1	170		2.741						1
ABalaappaa	WT_Sample1	171		2.5777						1
ABalaappaa	WT_Sample1	172		2.3095						1
ABalaappaa	WT_Sample1	173		2.4436						1
ABalaappaa	WT_Sample1	174		2.362						1
ABalaappaa	WT_Sample1	175		2.3386						1
ABalaappaa	WT_Sample1	176		2.4494						1
ABalaappaa	WT_Sample1	177		2.4611						1
ABalaappaa	WT_Sample1	178		2.3153						1
ABalaappaa	WT_Sample1	179		2.5194						1
ABalaappaa	WT_Sample1	180		2.6652						1
ABalaappaa	WT_Sample1	181		2.6186						1
ABalaappaa	WT_Sample1	182		2.5078						1
ABalaappaa	WT_Sample1	183		2.5602						1
ABalaappaa	WT_Sample1	184		2.6011						1
ABalaappaa	WT_Sample1	185		2.5428						1
ABalaappaa	WT_Sample1	186		2.4028						1
ABalaappaa	WT_Sample1	187		2.4261						1
ABalaappaa	WT_Sample1	188		2.6419						1
ABalaappaa	WT_Sample1	189		2.5194						1
ABalapapaa	WT_Sample1	150		3.6917						1
ABalapapaa	WT_Sample1	151		3.4001						1
ABalapapaa	WT_Sample1	152		3.0851						1
ABalapapaa	WT_Sample1	153		2.8693						1
ABalapapaa	WT_Sample1	154		3.9891						1
ABalapapaa	WT_Sample1	155		2.776						1
ABalapapaa	WT_Sample1	156		2.776						1
ABalapapaa	WT_Sample1	157		2.951		2.5898				1
ABalapapaa	WT_Sample1	159		4.1174						1
ABalapapaa	WT_Sample1	160		2.5952						1
ABalapapaa	WT_Sample1	161		2.7119						1
ABalapapaa	WT_Sample1	162		2.8285						1
ABalapapaa	WT_Sample1	163		2.8577						1
ABalapapaa	WT_Sample1	164		2.4903						1
ABalapapaa	WT_Sample1	165		2.6769						1
ABalapapaa	WT_Sample1	166		3.68						1
ABalapapaa	WT_Sample1	167		3.4176						1
ABalapapaa	WT_Sample1	168		3.8141						1
ABalapapaa	WT_Sample1	169		4.0474						1
ABalapapaa	WT_Sample1	170		2.5544		15.4858				1
ABalapapaa	WT_Sample1	172		2.4961						1
ABalapapaa	WT_Sample1	173		2.6011						1
ABalapapaa	WT_Sample1	174		2.6011						1
ABalapapaa	WT_Sample1	175		2.8577						1
ABalapapaa	WT_Sample1	176		2.4086						1
ABalapapaa	WT_Sample1	177		2.397						1
ABalapapaa	WT_Sample1	178		2.3386						1
ABalapapaa	WT_Sample1	179		2.3736						1
ABalapapaa	WT_Sample1	180		2.5253						1
ABalapapaa	WT_Sample1	181		2.5486						1
ABalapapaa	WT_Sample1	182		2.5428						1
ABalapapaa	WT_Sample1	183		2.5719						1
ABalapapaa	WT_Sample1	184		2.4378						1
ABalapapaa	WT_Sample1	185		2.5777						1
ABalapapaa	WT_Sample1	186		2.8927						1
ABalapapaa	WT_Sample1	187		2.5661						1
ABalapapap	WT_Sample1	171		2.327		1.1222	0.9435
ABalappaaa	WT_Sample1	144		3.8783		0.9757				1
ABalappaaa	WT_Sample1	156		3.1843						1
ABalappaaa	WT_Sample1	157		3.1784	0.5163					1
ABalappaaa	WT_Sample1	158		2.257	0.5818					1
ABalappaaa	WT_Sample1	159		2.3328	0.5792					1
ABalappaaa	WT_Sample1	160		2.2745	0.5677					1
ABalappaaa	WT_Sample1	161		2.3795	0.5741					1
ABalappaaa	WT_Sample1	162		2.4144	0.7074					1
ABalappaaa	WT_Sample1	163		2.292	0.5731					1
ABalappaaa	WT_Sample1	164		2.2045	0.5222					1
ABalappaaa	WT_Sample1	165		2.2686	0.6039					1
ABalappaaa	WT_Sample1	166		2.2162	0.777					1
ABalappaaa	WT_Sample1	167		2.2337	0.6634					1
ABalappaaa	WT_Sample1	168		2.3736	0.678					1
ABalappaaa	WT_Sample1	169		2.3911						1
ABalappaaa	WT_Sample1	170		2.1637	0.615					1
ABalappaaa	WT_Sample1	171		2.3503						1
ABalappaaa	WT_Sample1	172		2.2861	0.5811					1
ABalappaaa	WT_Sample1	173		2.3678						1
ABalappaaa	WT_Sample1	174		2.6244						1
ABalappaaa	WT_Sample1	175		2.6361						1
ABalappaaa	WT_Sample1	176		4.0357			0.531			1
ABalappaaa	WT_Sample1	177		3.4292						1
ABalappaaa	WT_Sample1	178		3.2659						1
ABalappaaa	WT_Sample1	179		2.4844						1
ABalappaaa	WT_Sample1	180		3.1784						1
ABalappaaa	WT_Sample1	181		3.2134						1
ABalappaaa	WT_Sample1	182		2.5894						1
ABalappaaa	WT_Sample1	183		2.2686						1
ABalappaaa	WT_Sample1	184		2.4086						1
ABalappaaa	WT_Sample1	185		2.4728						1
ABalappaaa	WT_Sample1	186		2.362						1
ABalappaaa	WT_Sample1	187		2.362						1
ABalappaaa	WT_Sample1	188		2.3445						1
ABalappaaa	WT_Sample1	189		2.4961						1
ABalappaaa	WT_Sample1	190		2.5602						1
ABalppaaaa	WT_Sample1	148		2.7644						1
ABalppaaaa	WT_Sample1	149		2.7119						1
ABalppaaaa	WT_Sample1	150		2.3445		1.2292				1
ABalppaaaa	WT_Sample1	153		3.0793						1
ABalppaaaa	WT_Sample1	154		2.7644						1
ABalppaaaa	WT_Sample1	155		2.6594						1
ABalppaaaa	WT_Sample1	156		2.7994						1
ABalppaaaa	WT_Sample1	157		3.8433						1
ABalppaaaa	WT_Sample1	158		4.2282			0.4902			1
ABalppaaaa	WT_Sample1	159		4.3098			0.519			1
ABalppaaaa	WT_Sample1	160		2.5311						1
ABalppaaaa	WT_Sample1	161		3.3476						1
ABalppaaaa	WT_Sample1	162		2.4844						1
ABalppaaaa	WT_Sample1	163		4.2924			0.5128			1
ABalppaaaa	WT_Sample1	164		3.2193						1
ABalppaaaa	WT_Sample1	165		3.1493						1
ABalppaaaa	WT_Sample1	166		3.785						1
ABalppaaaa	WT_Sample1	167		2.8752						1
ABalppaaaa	WT_Sample1	168		2.4786						1
ABalppaaaa	WT_Sample1	169		2.7702						1
ABalppaaaa	WT_Sample1	170		2.3328						1
ABalppaaaa	WT_Sample1	171		2.3211						1
ABalppaaaa	WT_Sample1	172		2.362						1
ABalppaaaa	WT_Sample1	173		2.292						1
ABalppaaaa	WT_Sample1	174		3.1726						1
ABalppaaaa	WT_Sample1	175		2.7002						1
ABalppaaaa	WT_Sample1	176		2.5194						1
ABalppaaaa	WT_Sample1	177		2.3795						1
ABalppaaaa	WT_Sample1	178		2.292						1
ABalppaaaa	WT_Sample1	179		2.4028						1
ABalppaaaa	WT_Sample1	180		3.5867						1
ABalppaaaa	WT_Sample1	181		2.9976						1
ABalppaaaa	WT_Sample1	182		2.2861						1
ABalppaaaa	WT_Sample1	183		2.1812						1
ABalppaaaa	WT_Sample1	184		2.1462						1
ABalppaaaa	WT_Sample1	185		2.2045						1
ABalppaaaa	WT_Sample1	186		2.2512						1
ABalppaaaa	WT_Sample1	187		2.1987						1
ABalppaaaa	WT_Sample1	188		2.1812						1
ABalppaaaa	WT_Sample1	189		2.2162						1
ABalppaaaa	WT_Sample1	190		2.1928						1
ABalppaapa	WT_Sample1	151		3.7675	0.4793					1
ABalppaapa	WT_Sample1	152		4.5081	0.5713					1
ABalppaapa	WT_Sample1	153		3.8958						1
ABalppaapa	WT_Sample1	154		3.8666						1
ABalppaapa	WT_Sample1	155		2.9277						1
ABalppaapa	WT_Sample1	156		2.7002						1
ABalppaapa	WT_Sample1	157		2.7235						1
ABalppaapa	WT_Sample1	158		2.4203						1
ABalppaapa	WT_Sample1	159		2.8169						1
ABalppaapa	WT_Sample1	160		3.5225						1
ABalppaapa	WT_Sample1	161		2.7877						1
ABalppaapa	WT_Sample1	162		3.2076						1
ABalppaapa	WT_Sample1	163		2.9218						1
ABalppaapa	WT_Sample1	164		3.6042	0.4602	0.684				1
ABalppaapa	WT_Sample1	168		3.9366						1
ABalppaapa	WT_Sample1	169		2.8402						1
ABalppaapa	WT_Sample1	170		3.9308						1
ABalppaapa	WT_Sample1	171		3.2426						1
ABalppaapa	WT_Sample1	172		2.811						1
ABalppaapa	WT_Sample1	173		4.479						1
ABalppaapa	WT_Sample1	175		3.0385						1
ABalppaapa	WT_Sample1	176		3.2251						1
ABalppaapa	WT_Sample1	178		2.5253						1
ABalppaapa	WT_Sample1	179		2.4378						1
ABalppaapa	WT_Sample1	180		2.2861						1
ABalppaapa	WT_Sample1	181		2.4728						1
ABalppaapa	WT_Sample1	182		2.2803						1
ABalppaapa	WT_Sample1	183		2.3503						1
ABalppaapa	WT_Sample1	184		2.3561						1
ABaraaaapp	WT_Sample1	161		4.4906	0.5138					1
ABaraaaapp	WT_Sample1	162		4.339						1
ABaraaaapp	WT_Sample1	163		3.645	0.471					1
ABaraaaapp	WT_Sample1	164		4.3623	0.4593					1
ABaraaaapp	WT_Sample1	170		4.0008						1
ABaraaaapp	WT_Sample1	171		4.3857						1
ABaraaaapp	WT_Sample1	174		3.3942	0.4599					1
ABaraaaapp	WT_Sample1	175		3.855	0.4593					1
ABaraaaapp	WT_Sample1	176		3.68	0.4587					1
ABaraaaapp	WT_Sample1	177		2.7644	0.4711					1
ABaraaaapp	WT_Sample1	178		3.4875	0.478					1
ABaraaaapp	WT_Sample1	179		3.0851						1
ABaraaaapp	WT_Sample1	180		4.4731						1
ABaraaaapp	WT_Sample1	181		3.5692						1
ABaraaaapp	WT_Sample1	182		3.2426						1
ABaraaaapp	WT_Sample1	183		3.2951						1
ABaraaaapp	WT_Sample1	184		3.6625						1
ABaraaaapp	WT_Sample1	185		3.75						1
ABaraaaapp	WT_Sample1	186		3.2368						1
ABaraaaapp	WT_Sample1	187		2.7585						1
ABaraaaapp	WT_Sample1	188		2.8227						1
ABaraaaapp	WT_Sample1	189		2.8518						1
ABaraaaapp	WT_Sample1	190		2.7935						1
ABaraaaapp	WT_Sample1	191		2.7819						1
ABaraaaapp	WT_Sample1	192		2.7002						1
ABaraaaapp	WT_Sample1	193		2.7119						1
ABaraaaapp	WT_Sample1	194		2.5019						1
ABaraaaapp	WT_Sample1	195		2.7119						1
ABaraaaapp	WT_Sample1	196		2.6769						1
ABaraaaapp	WT_Sample1	197		2.5428						1
ABaraaaapp	WT_Sample1	198		2.7935						1
ABaraaaapp	WT_Sample1	199		2.6419						1
ABaraaaapp	WT_Sample1	200		2.776						1
ABaraaaapp	WT_Sample1	201		2.5311						1
ABaraaaapp	WT_Sample1	202		2.4669						1
ABaraaaapp	WT_Sample1	203		2.4028						1
ABaraaaapp	WT_Sample1	204		2.5836						1
ABaraaaapp	WT_Sample1	205		2.6769						1
ABaraaaapp	WT_Sample1	206		2.6886						1
ABaraaaapp	WT_Sample1	207		2.4786						1
ABaraaaapp	WT_Sample1	208		2.7235						1
ABaraaaapp	WT_Sample1	209		2.5486						1
ABaraaaapp	WT_Sample1	210		2.5253						1
ABaraaaapp	WT_Sample1	211		3.0851						1
ABaraaaapp	WT_Sample1	212		3.1085						1
ABaraaaapp	WT_Sample1	213		2.9218						1
ABaraaaapp	WT_Sample1	214		2.9043						1
ABaraaaapp	WT_Sample1	215		2.5836						1
ABaraaaapp	WT_Sample1	216		2.3445						1
ABaraaaapp	WT_Sample1	217		2.6477						1
ABaraaaapp	WT_Sample1	218		2.5952						1
ABaraaaapp	WT_Sample1	219		2.5253						1
ABarappaaa	WT_Sample1	176		2.8402	0.5405	1.2497	0.9014
ABarpaaapp	WT_Sample1	156		3.9308						1
ABarpaaapp	WT_Sample1	165		2.986						1
ABarpaaapp	WT_Sample1	166		3.1668						1
ABarpaaapp	WT_Sample1	167		3.5925	0.5057					1
ABarpaaapp	WT_Sample1	168		4.1291	0.5146					1
ABarpaaapp	WT_Sample1	169		3.6567	0.5311					1
ABarpaaapp	WT_Sample1	170		3.2718	0.5388					1
ABarpaaapp	WT_Sample1	171		3.3184	0.4753					1
ABarpaaapp	WT_Sample1	172		3.4117						1
ABarpaaapp	WT_Sample1	173		3.7208						1
ABarpaaapp	WT_Sample1	174		3.0676						1
ABarpaaapp	WT_Sample1	175		2.9802	0.4841					1
ABarpaaapp	WT_Sample1	176		3.1434	0.4766					1
ABarpaaapp	WT_Sample1	177		3.2193	0.4794					1
ABarpaaapp	WT_Sample1	178		2.9393						1
ABarpaaapp	WT_Sample1	179		3.2251	0.4954					1
ABarpaaapp	WT_Sample1	180		2.8927	0.4947					1
ABarpaaapp	WT_Sample1	181		2.9277	0.4921					1
ABarpaaapp	WT_Sample1	182		3.0735	0.5323					1
ABarpaaapp	WT_Sample1	183		2.9393	0.532					1
ABarpaaapp	WT_Sample1	184		2.8577	0.5122					1
ABarpaaapp	WT_Sample1	185		2.6069	0.5243					1
ABarpaaapp	WT_Sample1	186		2.5486	0.4984					1
ABarpaaapp	WT_Sample1	187		2.6886	0.5297					1
ABarpaaapp	WT_Sample1	188		2.4144	0.5433					1
ABarpaaapp	WT_Sample1	189		2.4028	0.511					1
ABarpaaapp	WT_Sample1	190		2.5253	0.494					1
ABarpaaapp	WT_Sample1	191		2.741						1
ABarpaaapp	WT_Sample1	192		2.6361						1
ABarpaaapp	WT_Sample1	193		2.4203						1
ABarpaaapp	WT_Sample1	194		2.6477						1
ABarpaaapp	WT_Sample1	195		2.5078						1
ABarpaaapp	WT_Sample1	196		2.706						1
ABarpaaapp	WT_Sample1	197		2.5136						1
ABarpaapaa	WT_Sample1	231		4.0707	0.8652		0.822
ABarpaapaa	WT_Sample1	232		2.9043	0.9258		0.873
ABarpaapaa	WT_Sample1	233		2.4844	0.9458		0.8914
ABarpaapaa	WT_Sample1	243		4.4556	0.926		0.8052
ABarpaapaa	WT_Sample1	248		3.8958	0.9138		0.8297
ABarpaapap	WT_Sample1	213		4.3973	0.824		0.9443
ABarpaapap	WT_Sample1	233		4.1232	0.9458		0.9478
ABarpaapap	WT_Sample1	234		4.4731	0.9077		0.9434
ABarpaapap	WT_Sample1	235		2.9685	0.8496		0.9624
ABarpaapap	WT_Sample1	236		2.4494	0.9343		0.969
ABarpaapap	WT_Sample1	237		2.5194	0.8333		0.9681
ABarpaapap	WT_Sample1	238		2.4611	0.8952		0.9688
ABarpaapap	WT_Sample1	239		2.3736	0.926		0.97
ABarpaapap	WT_Sample1	240		2.3445	0.9142		0.9703
ABarpaapap	WT_Sample1	241		2.6361	0.9283		0.9666
ABarpaapap	WT_Sample1	242		2.9043	0.8782		0.9632
ABarpaapap	WT_Sample1	246		2.8052	0.9014		0.9645
ABarpaappa	WT_Sample1	221		3.1376	0.8519		0.9278
ABarpaappa	WT_Sample1	222		2.8344	0.8753		0.9348
ABarpaappa	WT_Sample1	223		2.327	0.8948		0.9465
ABarpaappp	WT_Sample1	225		2.8402	0.8834		0.9442
ABarpaappp	WT_Sample1	233		3.0326	0.8383		0.9404
ABarpaappp	WT_Sample1	238		3.5575	0.8012		0.9301
ABarpapapa	WT_Sample1	228		3.3009	0.8485		0.903
ABarpapapa	WT_Sample1	229		3.5167	0.7351		0.8967
ABarpapapa	WT_Sample1	230		3.3417	0.7226		0.9018
ABarpapapa	WT_Sample1	231		2.8868	0.6838		0.9152
ABarpapapa	WT_Sample1	232		2.8402	0.7007		0.9165
ABarpapapa	WT_Sample1	233		2.706	0.716		0.9205
ABarpapapa	WT_Sample1	234		2.8052	0.6883		0.9176
ABarpapapa	WT_Sample1	235		3.2718	0.6705		0.9039
ABarpapapa	WT_Sample1	236		3.4292	0.6761		0.8992
ABarpapapa	WT_Sample1	238		3.1026	0.619		0.9088
ABarpapapa	WT_Sample1	240		3.3651	0.6504		0.9011
ABarpapapp	WT_Sample1	245		3.6158	0.6836		0.8963
ABarpapapp	WT_Sample1	246		4.339	0.4557		0.8755
ABarpappaa	WT_Sample1	160		4.1524
ABarpappaa	WT_Sample1	161		4.374
ABarpappaa	WT_Sample1	162		3.7616			0.525
ABarpappaa	WT_Sample1	163		4.514
ABarpappaa	WT_Sample1	164		2.8752			0.637
ABarpappaa	WT_Sample1	165		3.1551			0.6016
ABarpappaa	WT_Sample1	208		4.1291	0.6293
ABarpappaa	WT_Sample1	209		3.8316	0.8518		0.5162
ABarpappaa	WT_Sample1	210		4.4323	0.8842
ABarpappaa	WT_Sample1	211		3.4176	0.8728		0.5685
ABarpappaa	WT_Sample1	212		3.4234	0.8826		0.5677
ABarpappaa	WT_Sample1	213		4.2399	0.8772
ABarpappaa	WT_Sample1	215		4.1524	0.6685
ABarpappaa	WT_Sample1	217		4.1349	0.8032
ABarpappaa	WT_Sample1	218		3.2193	0.899		0.5935
ABarpappaa	WT_Sample1	219		3.2309	0.8446		0.592
ABarpappaa	WT_Sample1	220		3.7325	0.8702		0.5287
ABarpappaa	WT_Sample1	221		3.7966	0.8667		0.5206
ABarpappaa	WT_Sample1	222		2.7352	0.9106		0.6546
ABarpappaa	WT_Sample1	223		3.5459	0.8568		0.5523
ABarpappaa	WT_Sample1	224		3.3884	0.8701		0.5722
ABarpappaa	WT_Sample1	226		3.5459	0.8615		0.5523
ABarpappaa	WT_Sample1	229		4.0241	0.6855		0.4919
ABarpappap	WT_Sample1	210		2.6886	0.8842		0.9288
ABarpappap	WT_Sample1	211		4.4032	0.8728		0.8833
ABarpappap	WT_Sample1	212		3.7966	0.8826		0.8994
ABarpappap	WT_Sample1	213		3.3126	0.8772		0.9122
ABarpappap	WT_Sample1	214		4.0941	0.8461		0.8915
ABarpappap	WT_Sample1	216		4.4148	0.8325		0.883
ABarpappap	WT_Sample1	218		2.9918	0.899		0.9207
ABarpappap	WT_Sample1	220		4.2457	0.8702		0.8875
ABarpappap	WT_Sample1	221		4.3973	0.8667		0.8835
ABarpappap	WT_Sample1	222		2.7585	0.9106		0.9269
ABarpappap	WT_Sample1	231		4.2865	0.7666		0.8864
ABarpappap	WT_Sample1	235		3.8316	0.7695		0.8985
ABarpappap	WT_Sample1	237		4.1349	0.7572		0.8905
ABarpappap	WT_Sample1	239		4.3682	0.7245		0.8843
ABarpappap	WT_Sample1	249		4.3798	0.5723		0.884
ABarpappap	WT_Sample1	250		3.785	0.5967		0.8997
ABarpapppa	WT_Sample1	221		4.3157	0.9206		0.8523
ABarpapppa	WT_Sample1	222		4.4148	0.9296		0.8489
ABarpapppa	WT_Sample1	223		4.1699	0.9036		0.8573
ABarpapppa	WT_Sample1	225		3.2892	0.953		0.8874
ABarpapppa	WT_Sample1	226		3.855	0.9461		0.8681
ABarpapppa	WT_Sample1	227		4.3682	0.9148		0.8505
ABarpapppa	WT_Sample1	228		3.0385	0.9553		0.896
ABarpapppa	WT_Sample1	229		3.54	0.95		0.8788
ABarpapppa	WT_Sample1	230		2.9043	0.9567		0.9006
ABarpapppa	WT_Sample1	231		3.0968	0.9554		0.894
ABarpapppa	WT_Sample1	232		3.3184	0.9473		0.8864
ABarpapppa	WT_Sample1	233		2.7935	0.9441		0.9044
ABarpapppa	WT_Sample1	234		4.0941	0.9308		0.8599
ABarpapppa	WT_Sample1	235		4.4207	0.9263		0.8487
ABarpapppa	WT_Sample1	237		4.0474	0.9223		0.8615
ABarpapppa	WT_Sample1	238		4.4148	0.8991		0.8489
ABarpapppa	WT_Sample1	240		3.75	0.8612		0.8716
ABarpapppa	WT_Sample1	241		3.4117	0.8934		0.8832
ABarpapppa	WT_Sample1	242		3.8958	0.9283		0.8667
ABarpapppa	WT_Sample1	244		3.9308	0.9346		0.8655
ABarpapppa	WT_Sample1	245		4.4615	0.9164		0.8473
ABarpapppp	WT_Sample1	213		3.9658	0.9081		0.9115
ABarpapppp	WT_Sample1	214		2.2803	0.8774		0.9491
ABarpapppp	WT_Sample1	222		4.0707	0.9296		0.9092
ABarpapppp	WT_Sample1	224		2.6361	0.9381		0.9412
ABarpapppp	WT_Sample1	225		2.3736	0.953		0.947
ABarpapppp	WT_Sample1	226		2.6477	0.9461		0.9409
ABarpapppp	WT_Sample1	228		2.3445	0.9553		0.9477
ABarpapppp	WT_Sample1	229		2.4903	0.95		0.9444
ABarpapppp	WT_Sample1	230		2.3211	0.9567		0.9482
ABarpapppp	WT_Sample1	231		2.2745	0.9554		0.9492
ABarpapppp	WT_Sample1	232		3.0385	0.9473		0.9322
ABarpapppp	WT_Sample1	233		3.9483	0.9441		0.9119
ABarpapppp	WT_Sample1	234		4.2515	0.9308		0.9051
ABarpapppp	WT_Sample1	235		4.4615	0.9263		0.9004
ABarpapppp	WT_Sample1	243		4.1174	0.911		0.9081
ABarpapppp	WT_Sample1	244		3.9541	0.9346		0.9118
ABarppaaaa	WT_Sample1	220		3.8608	0.507		0.6124
ABarppaaaa	WT_Sample1	223		3.9191	0.5054		0.6066
ABarppaaap	WT_Sample1	234		2.6769	0.8861		0.9443
ABarppaaap	WT_Sample1	235		2.8285	0.8834		0.9411
ABarppaaap	WT_Sample1	241		2.9102	0.8696		0.9394
ABarppaaap	WT_Sample1	244		2.9102	0.8076		0.9394
ABarppaaap	WT_Sample1	247		3.3476	0.7665		0.9303
ABarppaaap	WT_Sample1	248		3.0268	0.7832		0.937
ABarppaaap	WT_Sample1	249		4.0066	0.7761		0.9166
ABarppaaap	WT_Sample1	250		3.6742	0.7566		0.9236
ABarppaaap	WT_Sample1	251		3.3592	0.7928		0.9301
ABarppaapa	WT_Sample1	241		3.47	0.647		0.9297
ABarppaapa	WT_Sample1	255		3.9541	0.6994		0.9198
ABarpppapa	WT_Sample1	237		3.4059	0.684		0.936
ABarpppapa	WT_Sample1	240		3.2076	0.6761		0.9397
ABarpppapa	WT_Sample1	241		3.7266	0.6544		0.93
ABarpppapa	WT_Sample1	245		3.7675	0.6691	0.7436	0.9292
ABarpppapa	WT_Sample1	252		2.8693	0.6988		0.9461
ABarpppapa	WT_Sample1	254		2.4903	0.7012		0.9532
ABarpppapa	WT_Sample1	255		3.0676	0.6855		0.9424
ABarpppppa	WT_Sample1	196		2.4378	0.604		0.9286
ABarpppppa	WT_Sample1	198		2.7002	0.505		0.9209
ABarpppppa	WT_Sample1	199		3.2776		0.8087	0.904
ABarpppppa	WT_Sample1	201		3.4059	0.5804		0.9002
ABplaaaapa	WT_Sample1	202		3.5459	0.4728		0.8652
ABplaaaapa	WT_Sample1	203		3.2368	0.6722		0.877
ABplaaaapa	WT_Sample1	204		2.9102			0.8894
ABplaaaapa	WT_Sample1	205		4.2574	0.4842		0.8382
ABplaaaapa	WT_Sample1	249		3.9541	0.6644		0.8497
ABplaaaapa	WT_Sample1	250		3.0268	0.6886		0.885
ABplaaaapa	WT_Sample1	251		3.4642	0.7343		0.8684
ABplaaaapa	WT_Sample1	252		4.0474	0.7098		0.8462
ABplaaapaa	WT_Sample1	176		4.0649	0.4691		0.6342
ABplaaapaa	WT_Sample1	186		3.7733	0.7847		0.6605
ABplaaapaa	WT_Sample1	187		4.1407	0.4996		0.6274
ABplaaapaa	WT_Sample1	188		4.4265			0.6017
ABplaaapaa	WT_Sample1	191		4.4032	0.5757		0.6038
ABplaaapaa	WT_Sample1	195		3.8958	0.6128		0.6494
ABplaaapaa	WT_Sample1	197		4.4731	0.6199		0.5975
ABplaaapaa	WT_Sample1	216		3.3359	0.6631		0.6998
ABplaaapaa	WT_Sample1	218		4.1174	0.5698		0.6295
ABplaaapap	WT_Sample1	168		3.9716	0.8073		0.8
ABplaaapap	WT_Sample1	170		3.9833	0.6995		0.7994
ABplaaapap	WT_Sample1	180		2.951	0.8286		0.8514
ABplaaapap	WT_Sample1	228		4.4498	0.7888		0.776
ABplaaapap	WT_Sample1	230		3.3884	0.7302		0.8294
ABplaaapap	WT_Sample1	251		4.3157	0.7038		0.7827
ABplaaappa	WT_Sample1	214		2.1403	0.5706		0.9049
ABplaaappa	WT_Sample1	215		2.5194	0.6189		0.8881
ABplaaappa	WT_Sample1	219		3.715	0.6781		0.835
ABplaaappa	WT_Sample1	221		2.4436	0.7613		0.8915
ABplaaappa	WT_Sample1	230		2.3211	0.8434		0.8969
ABplaaappa	WT_Sample1	239		2.2745	0.9522		0.899
ABplaaappa	WT_Sample1	245		2.4961	0.8197		0.8891
ABplaaappa	WT_Sample1	246		2.9393	0.9446		0.8694
ABplaaappa	WT_Sample1	248		2.7585	0.833		0.8775
ABplaaappa	WT_Sample1	250		2.3036	0.823		0.8977
ABplaaappa	WT_Sample1	251		2.8344	0.8738		0.8741
ABplaaappa	WT_Sample1	252		2.9393	0.8618		0.8694
ABplaaappa	WT_Sample1	255		4.3507	0.8191		0.8067
ABplaaappp	WT_Sample1	192		4.1232	0.9167		0.8802
ABplaaappp	WT_Sample1	236		2.7119	0.8255		0.9212
ABplaaappp	WT_Sample1	238		2.0995	0.8392		0.939
ABplaaappp	WT_Sample1	239		2.7935	0.9522		0.9188
ABplaaappp	WT_Sample1	246		2.9393	0.9446		0.9146
ABplaappaa	WT_Sample1	202		3.68		0.6807	0.7088
ABplaappaa	WT_Sample1	237		3.056	0.6016	0.9714	0.7582
ABplaappap	WT_Sample1	223		3.2251	0.8434		0.9272
ABplaapppa	WT_Sample1	210		4.1815	0.7578		0.9365
ABplaapppa	WT_Sample1	211		3.5692	0.5455		0.9458
ABplaapppa	WT_Sample1	233		4.0941	0.8763		0.9378
ABplaapppa	WT_Sample1	236		2.9277	0.887		0.9555
ABplaapppa	WT_Sample1	244		3.0385	0.875		0.9539
ABplaapppa	WT_Sample1	245		4.0882	0.8724		0.9379
ABplaapppa	WT_Sample1	246		3.4467	0.8708		0.9477
ABplaapppa	WT_Sample1	247		3.4117	0.8659		0.9482
ABplaapppa	WT_Sample1	249		2.5952	0.8877		0.9606
ABplaapppa	WT_Sample1	251		3.3476	0.8789		0.9492
ABplapapaa	WT_Sample1	199		3.0268	0.5453		0.9284
ABplappppa	WT_Sample1	186		2.8285	0.6977	0.85	0.8482
ABplappppa	WT_Sample1	252		4.2632	0.7846		0.7711
ABplappppa	WT_Sample1	254		3.4467	0.6415		0.815
ABplappppa	WT_Sample1	255		2.5777	0.6543		0.8616
ABplappppp	WT_Sample1	237		2.4903	0.7264		0.8605
ABplpappap	WT_Sample1	131		4.2924		1.0277				1
ABplpappap	WT_Sample1	153		4.0241						1
ABplpappap	WT_Sample1	156		3.2134						1
ABplpappap	WT_Sample1	157		3.1551						1
ABplpappap	WT_Sample1	158		3.4292						1
ABplpappap	WT_Sample1	159		3.6683						1
ABplpappap	WT_Sample1	161		3.8025						1
ABplpappap	WT_Sample1	162		3.9483						1
ABplpappap	WT_Sample1	163		2.7877						1
ABplpappap	WT_Sample1	164		3.0793						1
ABplpappap	WT_Sample1	165		2.3561						1
ABplpappap	WT_Sample1	166		2.3211						1
ABplpappap	WT_Sample1	167		2.3211						1
ABplpappap	WT_Sample1	168		2.6011						1
ABplpappap	WT_Sample1	169		2.4144						1
ABplpappap	WT_Sample1	170		3.3009						1
ABplpappap	WT_Sample1	171		3.1318						1
ABplpappap	WT_Sample1	172		2.951						1
ABplpappap	WT_Sample1	173		2.292						1
ABplpappap	WT_Sample1	174		2.8052		1.8858				1
ABplpappap	WT_Sample1	176		2.5602						1
ABplpappap	WT_Sample1	177		2.4961						1
ABplpappap	WT_Sample1	178		2.4028						1
ABplpappap	WT_Sample1	179		2.5019						1
ABplpappap	WT_Sample1	180		2.5136						1
ABplpappap	WT_Sample1	181		3.1376						1
ABplpappap	WT_Sample1	182		2.397						1
ABplpappap	WT_Sample1	183		2.706						1
ABplpappap	WT_Sample1	184		2.3853						1
ABplpappap	WT_Sample1	185		2.3386						1
ABplpappap	WT_Sample1	186		3.5167						1
ABplpappap	WT_Sample1	187		2.2045						1
ABplpappap	WT_Sample1	188		3.1726						1
ABplpappap	WT_Sample1	189		2.5194						1
ABplpappap	WT_Sample1	190		3.0268						1
ABplpappap	WT_Sample1	191		2.3911						1
ABplpappap	WT_Sample1	192		2.8169						1
ABplpappap	WT_Sample1	193		2.4903						1
ABplpappap	WT_Sample1	194		2.9568						1
ABplpappap	WT_Sample1	195		2.7352						1
ABplpappap	WT_Sample1	196		2.7702						1
ABplpappap	WT_Sample1	197		2.3678						1
ABplppaaap	WT_Sample1	142		3.4992						1
ABplppaaap	WT_Sample1	143		3.8608						1
ABplppaaap	WT_Sample1	144		3.7675						1
ABplppaaap	WT_Sample1	145		3.6392						1
ABplppaaap	WT_Sample1	146		2.6652						1
ABplppaaap	WT_Sample1	148		3.785						1
ABplppaaap	WT_Sample1	149		4.1291		1.7538				1
ABplppaaap	WT_Sample1	151		2.4494						1
ABplppaaap	WT_Sample1	152		2.6886						1
ABplppaaap	WT_Sample1	153		3.6917						1
ABplppaaap	WT_Sample1	154		2.9685						1
ABplppaaap	WT_Sample1	155		3.0093						1
ABplppaaap	WT_Sample1	156		4.5198						1
ABplppaaap	WT_Sample1	157		3.3359						1
ABplppaaap	WT_Sample1	158		3.5808						1
ABplppaaap	WT_Sample1	159		4.2865						1
ABplppaaap	WT_Sample1	160		2.5602						1
ABplppaaap	WT_Sample1	161		3.4176						1
ABplppaaap	WT_Sample1	162		3.0793						1
ABplppaaap	WT_Sample1	163		2.4086						1
ABplppaaap	WT_Sample1	164		2.4669						1
ABplppaaap	WT_Sample1	165		2.3211						1
ABplppaaap	WT_Sample1	166		2.6827						1
ABplppaaap	WT_Sample1	167		2.5952						1
ABplppaaap	WT_Sample1	168		2.6594						1
ABplppaaap	WT_Sample1	169		2.6827						1
ABplppaaap	WT_Sample1	170		2.5661						1
ABplppaaap	WT_Sample1	171		2.1987						1
ABplppaaap	WT_Sample1	172		3.0035						1
ABplppaaap	WT_Sample1	174		2.9102						1
ABplppaaap	WT_Sample1	175		3.8958						1
ABplppaaap	WT_Sample1	176		3.8899						1
ABplppaaap	WT_Sample1	178		3.2368						1
ABplppaaap	WT_Sample1	179		3.7266						1
ABplppaaap	WT_Sample1	180		3.8841						1
ABplppaaap	WT_Sample1	181		3.2659						1
ABplppaaap	WT_Sample1	182		3.505						1
ABplppaaap	WT_Sample1	183		2.8985						1
ABplppaaap	WT_Sample1	184		3.1843						1
ABplppaaap	WT_Sample1	185		3.2018		0.9224				1
ABplppaaap	WT_Sample1	187		4.0241						1
ABplppaaap	WT_Sample1	188		3.54						1
ABplppaaap	WT_Sample1	189		2.327						1
ABplpppapp	WT_Sample1	146		2.5952						1
ABplpppapp	WT_Sample1	147		2.2803						1
ABplpppapp	WT_Sample1	148		2.3736						1
ABplpppapp	WT_Sample1	149		2.1928						1
ABplpppapp	WT_Sample1	150		2.6944						1
ABplpppapp	WT_Sample1	151		2.6652						1
ABplpppapp	WT_Sample1	152		2.3153						1
ABplpppapp	WT_Sample1	153		2.4553						1
ABplpppapp	WT_Sample1	154		2.4086						1
ABplpppapp	WT_Sample1	155		2.292						1
ABplpppapp	WT_Sample1	156		2.5194						1
ABplpppapp	WT_Sample1	157		2.2278						1
ABplpppapp	WT_Sample1	158		2.5253						1
ABplpppapp	WT_Sample1	159		2.7294						1
ABplpppapp	WT_Sample1	160		3.0443						1
ABplpppapp	WT_Sample1	161		2.6069						1
ABplpppapp	WT_Sample1	162		4.0008						1
ABplpppapp	WT_Sample1	163		2.397						1
ABplpppapp	WT_Sample1	164		2.6652						1
ABplpppapp	WT_Sample1	165		2.5486						1
ABplpppapp	WT_Sample1	166		2.5311						1
ABplpppapp	WT_Sample1	167		2.6069		0.8022				1
ABplpppapp	WT_Sample1	172		2.4378						1
ABplpppapp	WT_Sample1	173		2.2453						1
ABplpppapp	WT_Sample1	174		2.3036						1
ABplpppapp	WT_Sample1	175		2.3328						1
ABplpppapp	WT_Sample1	176		2.2453						1
ABpraappaa	WT_Sample1	221		3.5459			0.7512
ABpraappaa	WT_Sample1	224		3.021			0.7881
ABpraappaa	WT_Sample1	227		2.811	0.6995		0.8028
ABpraappaa	WT_Sample1	228		2.4378	0.7599		0.829
ABpraappaa	WT_Sample1	229		2.3386	0.7269		0.8359
ABpraappaa	WT_Sample1	230		2.4378	0.745		0.829
ABpraappaa	WT_Sample1	231		3.3884	0.883		0.7623
ABpraappaa	WT_Sample1	232		3.1434	0.8958		0.7795
ABpraappaa	WT_Sample1	233		2.5602	0.8956		0.8204
ABpraappaa	WT_Sample1	234		2.7177	0.7539		0.8093
ABpraappaa	WT_Sample1	235		2.6944	0.9051		0.811
ABpraappaa	WT_Sample1	236		3.2193	0.8966		0.7741
ABpraappaa	WT_Sample1	237		3.0968	0.9234	1.036	0.7827
ABpraappap	WT_Sample1	237		3.0151	0.9234		0.945
ABpraappap	WT_Sample1	238		3.54	0.7318		0.9354
ABpraappap	WT_Sample1	239		2.8227	0.8405		0.9485
ABpraappap	WT_Sample1	240		2.6711	0.7378		0.9513
ABpraappap	WT_Sample1	241		2.9918	0.7532		0.9454
ABpraappap	WT_Sample1	242		2.8518	0.7346		0.948
ABpraappap	WT_Sample1	243		2.8285	0.7421		0.9484
ABpraappap	WT_Sample1	244		3.3942	0.7319		0.9381
ABpraappap	WT_Sample1	245		2.7585	0.6921		0.9497
ABpraappap	WT_Sample1	246		3.2659	0.7057		0.9404
ABpraappap	WT_Sample1	247		3.1609	0.7371		0.9423
ABpraappap	WT_Sample1	248		4.2049	0.6819		0.9233
ABpraappap	WT_Sample1	249		3.8025	0.6902		0.9306
ABpraappap	WT_Sample1	250		4.2107	0.7223		0.9232
ABpraappap	WT_Sample1	251		4.1407	0.6883		0.9245
ABpraappap	WT_Sample1	252		3.8141	0.6782		0.9304
ABpraapppa	WT_Sample1	221		3.2718	0.7458		0.9427
ABpraapppa	WT_Sample1	232		4.4615	0.7797		0.9219
ABprappppa	WT_Sample1	181		3.8375	0.5359		0.6341
ABprappppa	WT_Sample1	184		2.6302	0.5683	1.7426	0.7492
ABprappppa	WT_Sample1	187		2.741	0.6142	1.916	0.7387
ABprappppa	WT_Sample1	203		2.6886	0.6633	1.7781	0.7437
ABprappppa	WT_Sample1	207		3.1726	0.6577		0.6975
ABprappppa	WT_Sample1	208		3.9833	0.6301		0.6202
ABprappppa	WT_Sample1	210		4.1057	0.6381		0.6086
ABprappppa	WT_Sample1	212		4.1815	0.644		0.6013
ABprappppa	WT_Sample1	214		4.0357	0.6234		0.6152
ABprappppa	WT_Sample1	215		4.479	0.6182		0.573
ABprappppa	WT_Sample1	221		3.8666	0.8309		0.6314
ABprappppa	WT_Sample1	222		3.855	0.656		0.6325
ABprappppa	WT_Sample1	226		4.4965	0.6869		0.5713
ABprappppa	WT_Sample1	234		4.409	0.6878		0.5796
ABprappppa	WT_Sample1	238		3.4292	0.7622		0.6731
ABprappppa	WT_Sample1	239		4.2399	0.7846		0.5958
ABprappppa	WT_Sample1	240		2.6536	0.7732		0.747
ABprappppa	WT_Sample1	241		3.6625	0.7961		0.6508
ABprappppa	WT_Sample1	243		4.0124	0.7567		0.6175
ABprappppa	WT_Sample1	244		4.1407	0.764		0.6052
ABprappppa	WT_Sample1	245		3.8375	0.7314		0.6341
ABprappppa	WT_Sample1	246		2.8227	0.6711		0.7309
ABprappppa	WT_Sample1	247		2.9335	0.8012		0.7203
ABprappppa	WT_Sample1	250		4.374	0.7927		0.583
ABprppaaap	WT_Sample1	153		3.4292						1
ABprppaaap	WT_Sample1	154		3.1726						1
ABprppaaap	WT_Sample1	155		3.3826						1
ABprppaaap	WT_Sample1	156		3.1551						1
ABprppaaap	WT_Sample1	157		3.2193						1
ABprppaaap	WT_Sample1	158		2.8518						1
ABprppaaap	WT_Sample1	159		2.8285						1
ABprppaaap	WT_Sample1	160		2.4494						1
ABprppaaap	WT_Sample1	161		2.8344						1
ABprppaaap	WT_Sample1	162		2.6652						1
ABprppaaap	WT_Sample1	163		2.3445						1
ABprppaaap	WT_Sample1	164		3.2076						1
ABprppaaap	WT_Sample1	165		3.2718						1
ABprppaaap	WT_Sample1	166		3.4817						1
ABprppaaap	WT_Sample1	167		2.8227						1
ABprppaaap	WT_Sample1	168		2.7994						1
ABprppaaap	WT_Sample1	169		2.4669						1
ABprppaaap	WT_Sample1	170		2.5253						1
ABprppaaap	WT_Sample1	171		2.7819						1
ABprppaaap	WT_Sample1	172		3.126						1
ABprppaaap	WT_Sample1	173		3.715						1
ABprppaaap	WT_Sample1	174		2.6769						1
ABprppaaap	WT_Sample1	175		2.7294						1
ABprppaaap	WT_Sample1	176		2.2162						1
ABprppaaap	WT_Sample1	177		2.292						1
ABprppaaap	WT_Sample1	178		2.2628						1
ABprppaaap	WT_Sample1	179		2.4728						1
ABprppaaap	WT_Sample1	180		2.4903						1
ABprppaaap	WT_Sample1	181		2.2861						1
ABprppaaap	WT_Sample1	182		2.6652		1.058				1
ABprppaaap	WT_Sample1	184		4.3798		1.1014				1
ABprppaaap	WT_Sample1	191		3.1493						1
ABprppaaap	WT_Sample1	192		3.0793						1
ABprppaaap	WT_Sample1	193		2.5428						1
ABprppaaap	WT_Sample1	194		3.0035						1
ABprppaaap	WT_Sample1	195		3.4292						1
ABprppaaap	WT_Sample1	196		2.7644						1
ABprppaaap	WT_Sample1	197		4.0416						1
ABprpppaaa	WT_Sample1	132		3.8783		0.7677	0.8306
ABprpppapp	WT_Sample1	146		4.0008						1
ABprpppapp	WT_Sample1	148		3.0968			0.5346			1
ABprpppapp	WT_Sample1	149		3.0618			0.5399			1
ABprpppapp	WT_Sample1	150		3.1143			0.532			1
ABprpppapp	WT_Sample1	151		2.5836			0.6117			1
ABprpppapp	WT_Sample1	152		2.5544			0.6161			1
ABprpppapp	WT_Sample1	153		3.8025						1
ABprpppapp	WT_Sample1	154		2.9918			0.5504			1
ABprpppapp	WT_Sample1	155		2.4553			0.631			1
ABprpppapp	WT_Sample1	156		2.9802			0.5521			1
ABprpppapp	WT_Sample1	157		3.1143			0.532			1
ABprpppapp	WT_Sample1	158		2.5253			0.6205			1
ABprpppapp	WT_Sample1	159		2.397			0.6398			1
MSaaappa	WT_Sample1	171		4.339						1
MSaaappa	WT_Sample1	172		3.6742						1
MSaaappa	WT_Sample1	173		3.7325						1
MSaaappa	WT_Sample1	174		3.8608						1
MSaaappa	WT_Sample1	175		3.4642						1
MSaaappa	WT_Sample1	176		3.3534						1
MSaaappa	WT_Sample1	177		3.3709						1
MSaaappa	WT_Sample1	178		3.1085						1
MSaaappa	WT_Sample1	179		4.2924						1
MSaaappa	WT_Sample1	180		4.1232						1
MSaaappa	WT_Sample1	181		4.2924						1
MSaaappa	WT_Sample1	182		3.3417						1
MSaaappa	WT_Sample1	183		2.8169						1
MSaaappa	WT_Sample1	184		2.5194						1
MSaaappa	WT_Sample1	185		2.6011						1
MSaaappa	WT_Sample1	186		2.8518						1
MSaaappa	WT_Sample1	187		2.5136						1
MSaaappa	WT_Sample1	188		2.6302						1
MSaaappa	WT_Sample1	189		2.6069						1
MSaaappa	WT_Sample1	190		2.4611						1
MSaaappa	WT_Sample1	191		2.4494						1
MSaaappa	WT_Sample1	192		2.4086						1
MSaaappa	WT_Sample1	193		2.1695						1
MSaaappa	WT_Sample1	194		2.4728						1
MSaaappa	WT_Sample1	195		2.4378	0.4888					1
MSaaappa	WT_Sample1	196		2.6594	0.4663					1
MSaaappa	WT_Sample1	197		2.7935	0.4766					1
MSaaappa	WT_Sample1	198		2.5428	0.5425					1
MSaaappa	WT_Sample1	199		2.4786						1
MSaaappa	WT_Sample1	200		2.5952						1
MSaaappa	WT_Sample1	201		2.5777						1
MSaaappa	WT_Sample1	202		2.4494						1
MSaaappa	WT_Sample1	203		2.2861						1
MSaaappa	WT_Sample1	204		2.3736						1
MSaaappa	WT_Sample1	205		2.2978						1
MSaaappa	WT_Sample1	206		2.3561						1
MSaaappa	WT_Sample1	207		2.2162						1
MSaappaa	WT_Sample1	223		4.3857	0.5541		0.6616
MSapaaap	WT_Sample1	186		3.0793	0.6503	1.05	0.9192
MSapaapa	WT_Sample1	173		3.8899						1
MSapaapa	WT_Sample1	174		4.0999						1
MSapaapa	WT_Sample1	175		3.2134						1
MSapaapa	WT_Sample1	176		3.2484						1
MSapaapa	WT_Sample1	177		2.4669						1
MSapaapa	WT_Sample1	178		2.7294						1
MSapaapa	WT_Sample1	179		3.3709						1
MSapaapa	WT_Sample1	180		3.0501						1
MSapaapa	WT_Sample1	181		2.5194						1
MSapaapa	WT_Sample1	182		2.9976						1
MSapaapa	WT_Sample1	183		3.8491						1
MSapaapa	WT_Sample1	184		2.5602						1
MSapaapa	WT_Sample1	185		2.5428						1
MSapaapa	WT_Sample1	186		2.5078						1
MSapaapa	WT_Sample1	187		2.9743						1
MSapaapa	WT_Sample1	188		3.021						1
MSapaapa	WT_Sample1	189		3.0735						1
MSapaapa	WT_Sample1	190		2.5544						1
MSapaapa	WT_Sample1	191		2.3795						1
MSapaapa	WT_Sample1	192		2.3503						1
MSapaapa	WT_Sample1	193		2.4436						1
MSapaapa	WT_Sample1	194		2.7644						1
MSapaapa	WT_Sample1	195		2.3911						1
MSapaapa	WT_Sample1	196		2.2686						1
MSapaapa	WT_Sample1	197		2.3561						1
MSapaapa	WT_Sample1	198		2.2861						1
MSapaapa	WT_Sample1	199		2.3561						1
MSapaapa	WT_Sample1	200		2.4786						1
MSapaapa	WT_Sample1	201		2.2686						1
MSapaapa	WT_Sample1	202		2.1112						1
MSapaapa	WT_Sample1	203		2.2278						1
MSapapaa	WT_Sample1	208		3.0618			0.9055
MSappaaa	WT_Sample1	164		2.6827	0.5405		0.8755
MSappaaa	WT_Sample1	208		3.0093	0.5762		0.8604
MSappaaa	WT_Sample1	236		3.6392	0.85	1.126	0.8311
MSappapa	WT_Sample1	181		4.339						1
MSappapa	WT_Sample1	182		3.5167						1
MSappapa	WT_Sample1	188		4.0941						1
MSappapa	WT_Sample1	189		3.6275						1
MSappapa	WT_Sample1	190		2.4903			0.6153			1
MSappapa	WT_Sample1	191		2.6594			0.5892			1
MSappapa	WT_Sample1	192		2.3503			0.6369			1
MSappapa	WT_Sample1	193		2.7994			0.5676			1
MSappapa	WT_Sample1	194		2.9277			0.5477			1
MSappapa	WT_Sample1	195		2.5602			0.6045			1
MSappapa	WT_Sample1	196		2.7352			0.5775			1
MSappapa	WT_Sample1	197		2.9043			0.5514			1
MSappapa	WT_Sample1	198		3.0385			0.5306			1
MSappapa	WT_Sample1	200		2.2628		1.2072	0.6505			1
MSappapa	WT_Sample1	204		2.222			0.6568			1
MSappapa	WT_Sample1	205		2.2395			0.6541			1
MSappapa	WT_Sample1	206		2.6244			0.5946			1
MSapppap	WT_Sample1	206		3.8783	0.5832	1.0435	0.8625
MSppaaaa	WT_Sample1	179		2.5194	0.5152	1.289	0.9311
MSppaapa	WT_Sample1	174		4.4965						1
MSppaapa	WT_Sample1	175		3.4934						1
MSppaapa	WT_Sample1	176		2.5719						1
MSppaapa	WT_Sample1	177		3.1959		4.2615				1
MSppaapa	WT_Sample1	179		2.951		1.2758				1
MSppaapa	WT_Sample1	182		4.4906						1
MSppaapa	WT_Sample1	183		3.7033						1
MSppaapa	WT_Sample1	184		3.6275		0.7343				1
MSppaapa	WT_Sample1	186		2.8169						1
MSppaapa	WT_Sample1	187		2.5019						1
MSppaapa	WT_Sample1	188		2.7352						1
MSppaapa	WT_Sample1	189		2.4203						1
MSppaapa	WT_Sample1	190		2.3561						1
MSppaapa	WT_Sample1	191		2.1578						1
MSppaapa	WT_Sample1	192		2.4086						1
MSppaapa	WT_Sample1	193		2.6652						1
MSppaapa	WT_Sample1	194		2.4086						1
MSppaapa	WT_Sample1	195		2.5894						1
MSppaapa	WT_Sample1	196		2.4319						1
MSppaapa	WT_Sample1	197		2.8402						1
MSppaapa	WT_Sample1	198		2.3386						1
MSppaapa	WT_Sample1	199		2.3095						1
MSppaapa	WT_Sample1	200		2.3211						1
MSppaapa	WT_Sample1	201		2.292						1
MSppaapa	WT_Sample1	202		2.4436						1
MSppaapa	WT_Sample1	203		2.4436						1
MSppaapa	WT_Sample1	204		2.2512						1
MSppaapa	WT_Sample1	205		2.3678						1
MSppaapa	WT_Sample1	206		2.8927						1
MSppaapa	WT_Sample1	207		3.4642						1
MSppaapa	WT_Sample1	208		3.0676						1
MSppaapa	WT_Sample1	209		2.6069						1
MSppaapa	WT_Sample1	210		4.0066						1
MSppaapa	WT_Sample1	211		2.5194						1
MSpppaap	WT_Sample1	245		4.2924	0.565		0.833
MSpppaap	WT_Sample1	246		4.3215	0.4704		0.8319
MSpppaap	WT_Sample1	253		4.5198	0.5206		0.8242
MSpppaap	WT_Sample1	254		3.6742	0.5264		0.8571
MSpppapa	WT_Sample1	179		4.1757						1
MSpppapa	WT_Sample1	180		4.4148						1
MSpppapa	WT_Sample1	181		4.3448						1
MSpppapa	WT_Sample1	182		3.8375						1
MSpppapa	WT_Sample1	183		4.0882						1
MSpppapa	WT_Sample1	184		2.5836						1
MSpppapa	WT_Sample1	185		2.8693						1
MSpppapa	WT_Sample1	186		3.056	0.4925	4.0892				1
MSpppapa	WT_Sample1	188		2.2512			0.486			1
MSpppapa	WT_Sample1	189		2.4144						1
MSpppapa	WT_Sample1	190		2.6944						1
MSpppapa	WT_Sample1	191		3.8316						1
MSpppapa	WT_Sample1	192		3.4176						1
MSpppapa	WT_Sample1	193		3.54						1
MSpppapa	WT_Sample1	197		2.8577						1
MSpppapa	WT_Sample1	198		2.4961						1
MSpppapa	WT_Sample1	199		2.3561						1
MSpppapa	WT_Sample1	200		2.3503						1
MSpppapa	WT_Sample1	201		2.4903						1
MSpppapa	WT_Sample1	202		2.5894						1
MSpppapa	WT_Sample1	203		2.5486						1
Capapaa	WT_Sample1	244		4.199	0.5722		0.691
Capapaa	WT_Sample1	246		3.61			0.7343
Capapaa	WT_Sample1	248		3.8491	0.524		0.7167
Capapaa	WT_Sample1	249		3.5867			0.7361
Capapaa	WT_Sample1	250		4.0474	0.7471		0.7021
Capapaa	WT_Sample1	252		3.5342	0.5346		0.7399
Capapap	WT_Sample1	251		3.1901	0.8305	0.6808	0.8563
Capapap	WT_Sample1	255		3.75	0.8189		0.8311
Cappaap	WT_Sample1	199		2.5894	0.4695	0.7427	0.7877
Cappaap	WT_Sample1	220		4.1057	0.5623		0.6633
Cappaap	WT_Sample1	226		4.234	0.4644		0.6528
Cappaap	WT_Sample1	227		2.9043	0.4983		0.7618
Cappapa	WT_Sample1	219		2.7935		0.693	0.854
Cppaapp	WT_Sample1	249		4.1116	0.5177	0.8819	0.8476
Cppapap	WT_Sample1	255		4.2982	0.6918		0.7946
Cpppapa	WT_Sample1	216		2.4319	0.4568	1.0522	0.8622
Cpppapa	WT_Sample1	218		2.7819		1.0347	0.8424
Cpppapa	WT_Sample1	251		4.374	0.5823		0.7521
Cpppapa	WT_Sample1	252		4.3332	0.6335		0.7545
Cpppapa	WT_Sample1	255		4.0707	0.6046		0.7693
ABalaaaalal	WT_Sample1	208		3.9191			0.6456
ABalaaaalal	WT_Sample1	248		3.5634			0.6777
ABalaaaalal	WT_Sample1	249		2.7294			0.7532
ABalaaaalar	WT_Sample1	212		3.4759						1
ABalaaaalar	WT_Sample1	213		3.435						1
ABalaaaalar	WT_Sample1	214		3.75						1
ABalaaaalar	WT_Sample1	215		4.1699						1
ABalaaaalar	WT_Sample1	216		4.2749						1
ABalaaaalar	WT_Sample1	217		3.4642						1
ABalaaaalar	WT_Sample1	218		3.7558						1
ABalaaaalar	WT_Sample1	219		4.2049						1
ABalaaaalar	WT_Sample1	220		3.1784						1
ABalaaaalar	WT_Sample1	221		3.0443						1
ABalaaaalar	WT_Sample1	222		2.9685						1
ABalaaaalar	WT_Sample1	223		2.811						1
ABalaaaalar	WT_Sample1	224		2.8227						1
ABalaaaalar	WT_Sample1	225		3.0501						1
ABalaaaalar	WT_Sample1	226		2.6769						1
ABalaaaalar	WT_Sample1	227		2.6302						1
ABalaaaalar	WT_Sample1	228		2.8985						1
ABalaaaalar	WT_Sample1	229		2.7644						1
ABalaaaalar	WT_Sample1	230		3.1609						1
ABalaaaalar	WT_Sample1	231		3.8608						1
ABalaaaalar	WT_Sample1	232		3.0268						1
ABalaaaalar	WT_Sample1	233		3.0326						1
ABalaaaalar	WT_Sample1	234		2.8985						1
ABalaaaalar	WT_Sample1	235		2.776						1
ABalaaaalpa	WT_Sample1	223		3.82	0.5165		0.6389			1
ABalaaaalpa	WT_Sample1	229		4.0824	0.5		0.6141			1
ABalaaaarla	WT_Sample1	254		2.951			0.7312			1
ABalaaaarla	WT_Sample1	255		2.7935			0.7456			1
ABalaaaarrp	WT_Sample1	222		3.3242			0.6587
ABalaaaarrp	WT_Sample1	254		4.409			0.5473
ABalaaaarrp	WT_Sample1	255		3.7266			0.6174
ABalaaaparl	WT_Sample1	205		4.0824						1
ABalaaaparl	WT_Sample1	206		4.4556						1
ABalaaaparl	WT_Sample1	207		3.7266						1
ABalaaaparl	WT_Sample1	208		3.75						1
ABalaaaparl	WT_Sample1	209		4.2049						1
ABalaaaparl	WT_Sample1	210		4.3857						1
ABalaaaparl	WT_Sample1	211		3.2951			0.5272			1
ABalaaaparl	WT_Sample1	245		3.4234			0.5088			1
ABalaaaparl	WT_Sample1	246		3.3009			0.5264			1
ABalaaaparl	WT_Sample1	249		4.4731						1
ABalaaaparl	WT_Sample1	250		3.6625						1
ABalaaaparl	WT_Sample1	251		3.3242			0.523			1
ABalaaaparl	WT_Sample1	252		3.2251			0.5372			1
ABalaaaparl	WT_Sample1	253		3.1201			0.5523			1
ABalaaaparl	WT_Sample1	254		3.1434			0.549			1
ABalaaaparl	WT_Sample1	255		3.3534			0.5188			1
ABalaaaparr	WT_Sample1	227		3.3651			0.6539
ABalaaaparr	WT_Sample1	242		3.8724			0.6017
ABalaaappll	WT_Sample1	211		4.4615
ABalaaappll	WT_Sample1	244		3.5167			0.5864
ABalaaapplr	WT_Sample1	194		3.9599			0.4969			1
ABalaaapplr	WT_Sample1	205		4.1815						1
ABalaaapplr	WT_Sample1	253		4.2865						1
ABalaaapplr	WT_Sample1	254		3.5983			0.5428			1
ABalaaapplr	WT_Sample1	255		3.6217			0.5398			1
ABalaaapprr	WT_Sample1	215		3.6742			0.7431
ABalaapaaal	WT_Sample1	212		4.2982						1
ABalaapaaal	WT_Sample1	213		3.5692						1
ABalaapaaal	WT_Sample1	214		3.1201						1
ABalaapaaal	WT_Sample1	219		3.1434						1
ABalaapaaal	WT_Sample1	220		2.4728						1
ABalaapaaal	WT_Sample1	221		2.6361						1
ABalaapaaal	WT_Sample1	222		2.7585						1
ABalaapaaal	WT_Sample1	223		2.8752						1
ABalaapaaal	WT_Sample1	224		3.2193						1
ABalaapaaal	WT_Sample1	225		3.1784		2.8562				1
ABalaapaaal	WT_Sample1	229		2.4494						1
ABalaapaaal	WT_Sample1	230		2.8285						1
ABalaapaaal	WT_Sample1	231		3.2426						1
ABalaapaaal	WT_Sample1	232		2.7119						1
ABalaapaaal	WT_Sample1	233		3.4117						1
ABalaapaaal	WT_Sample1	234		2.9685						1
ABalaapaaal	WT_Sample1	235		2.7702						1
ABalaapaaal	WT_Sample1	236		2.8227						1
ABalaapaaal	WT_Sample1	237		2.7527						1
ABalaapaaal	WT_Sample1	238		2.776						1
ABalaapaaal	WT_Sample1	239		3.3359						1
ABalaapaaal	WT_Sample1	240		2.6244						1
ABalaapaaal	WT_Sample1	241		2.3153						1
ABalaapaaal	WT_Sample1	242		2.5369						1
ABalaapaaal	WT_Sample1	243		2.6477						1
ABalaapaaal	WT_Sample1	244		2.7702						1
ABalaapaapa	WT_Sample1	197		2.9976	0.5065		0.6823			1
ABalaapaapa	WT_Sample1	241		3.9249			0.5841			1
ABalaapaapa	WT_Sample1	243		4.0766			0.568			1
ABalaapaapa	WT_Sample1	247		3.0793			0.6737			1
ABalaapaapa	WT_Sample1	248		4.479			0.5253			1
ABalaapaapa	WT_Sample1	249		4.2865	0.5148		0.5457			1
ABalaapaapa	WT_Sample1	250		4.4556	0.5002		0.5278			1
ABalaapaapa	WT_Sample1	251		4.4148			0.5321			1
ABalaapaapa	WT_Sample1	252		3.575			0.6211			1
ABalaapaapa	WT_Sample1	253		3.2018	0.7417		0.6607			1
ABalaapaapa	WT_Sample1	254		4.4906	0.5908		0.5241			1
ABalaapaapa	WT_Sample1	255		4.5198	0.6061		0.521			1
ABalaapaapp	WT_Sample1	253		4.4556	0.7417		0.637
ABalaapappa	WT_Sample1	224		3.5808			0.7475			1
ABalaapappa	WT_Sample1	225		3.2892			0.7681			1
ABalaapappa	WT_Sample1	226		4.2807		1.0029	0.6982			1
ABalaapappa	WT_Sample1	230		4.0824		1.3688	0.7122			1
ABalaapappa	WT_Sample1	241		3.5983			0.7463			1
ABalaapappa	WT_Sample1	242		4.4965	0.4865		0.683			1
ABalaapappa	WT_Sample1	243		4.1874	0.6671		0.7048			1
ABalaapappa	WT_Sample1	244		4.1699	0.6576		0.706			1
ABalaapappa	WT_Sample1	245		4.3857	0.6832		0.6908			1
ABalaapappa	WT_Sample1	248		4.2749			0.6986			1
ABalaapappa	WT_Sample1	250		4.3623	0.7814		0.6924			1
ABalaapappa	WT_Sample1	251		3.3942	0.56		0.7607			1
ABalaapappa	WT_Sample1	252		3.2368	0.4798		0.7718			1
ABalaapappp	WT_Sample1	194		4.2049	0.5214		0.7242
ABalaapappp	WT_Sample1	195		2.327	0.6562		0.8474
ABalaapappp	WT_Sample1	197		2.8227	0.6053		0.8148
ABalaapappp	WT_Sample1	198		2.4319	0.5801		0.8405
ABalaapappp	WT_Sample1	199		4.2982	0.5478		0.7181
ABalaapappp	WT_Sample1	200		2.2686	0.5842		0.8512
ABalaapappp	WT_Sample1	201		2.187	0.559	0.8902	0.8565
ABalaapappp	WT_Sample1	203		2.5777	0.5998		0.8309
ABalaapappp	WT_Sample1	222		3.9599	0.5004	0.9457	0.7402
ABalaapappp	WT_Sample1	250		4.2807	0.7814		0.7192
ABalaappapp	WT_Sample1	215		2.7702			0.8334
ABalaapppap	WT_Sample1	197		3.4525						1
ABalaapppap	WT_Sample1	198		3.0501						1
ABalaapppap	WT_Sample1	199		3.3942						1
ABalaapppap	WT_Sample1	200		3.4875						1
ABalaapppap	WT_Sample1	201		3.7092						1
ABalaapppap	WT_Sample1	205		3.1085	0.663					1
ABalaapppap	WT_Sample1	206		2.7994						1
ABalaapppap	WT_Sample1	207		3.1085	0.4657					1
ABalaapppap	WT_Sample1	208		2.7644	0.6081					1
ABalaapppap	WT_Sample1	209		3.3184						1
ABalaapppap	WT_Sample1	210		3.1901						1
ABalaapppap	WT_Sample1	212		4.0066						1
ABalaapppap	WT_Sample1	213		3.2659						1
ABalaapppap	WT_Sample1	214		4.5198						1
ABalaapppap	WT_Sample1	215		3.9774						1
ABalaapppap	WT_Sample1	216		3.1143	0.4825					1
ABalaapppap	WT_Sample1	217		3.2484	0.5049					1
ABalaapppap	WT_Sample1	218		3.2951	0.6077					1
ABalaapppap	WT_Sample1	219		3.1784						1
ABalaapppap	WT_Sample1	220		2.881	0.5032					1
ABalaapppap	WT_Sample1	221		3.4817						1
ABalaapppap	WT_Sample1	222		3.8433						1
ABalaapppap	WT_Sample1	224		2.9976						1
ABalaapppap	WT_Sample1	225		2.7469						1
ABalaapppap	WT_Sample1	226		3.1201						1
ABalaapppap	WT_Sample1	227		3.5925						1
ABalaapppap	WT_Sample1	228		3.2601						1
ABalaapppap	WT_Sample1	229		3.1726						1
ABalapaaaap	WT_Sample1	223		2.6944						1
ABalapaaaap	WT_Sample1	224		2.8169						1
ABalapaaaap	WT_Sample1	225		2.4144						1
ABalapaaaap	WT_Sample1	226		2.3211						1
ABalapaaaap	WT_Sample1	227		2.2278						1
ABalapaaaap	WT_Sample1	228		2.2512						1
ABalapaaaap	WT_Sample1	229		2.2337						1
ABalapaaaap	WT_Sample1	230		2.2395						1
ABalapaaaap	WT_Sample1	231		2.1987						1
ABalapaaaap	WT_Sample1	232		2.2103						1
ABalapaaaap	WT_Sample1	233		2.2395						1
ABalapaaaap	WT_Sample1	234		2.1695						1
ABalapaaaap	WT_Sample1	235		2.327						1
ABalapaaaap	WT_Sample1	236		2.5019						1
ABalapaaaap	WT_Sample1	237		2.4553						1
ABalapaaaap	WT_Sample1	238		2.292						1
ABalapaaaap	WT_Sample1	239		2.2162						1
ABalapaaaap	WT_Sample1	240		2.3561						1
ABalapaaaap	WT_Sample1	241		2.4553						1
ABalapaaaap	WT_Sample1	242		2.4494						1
ABalapaaaap	WT_Sample1	243		2.3211						1
ABalapaaaap	WT_Sample1	244		2.4553						1
ABalapaaaap	WT_Sample1	245		2.2861						1
ABalapaaaap	WT_Sample1	246		2.6711						1
ABalapaaaap	WT_Sample1	247		2.3211						1
ABalapaaaap	WT_Sample1	248		2.3153						1
ABalapaaaap	WT_Sample1	249		2.3853						1
ABalapaaaap	WT_Sample1	250		2.2162						1
ABalapaaaap	WT_Sample1	251		2.1753	0.5662					1
ABalapaaaap	WT_Sample1	252		2.3095						1
ABalapaapaa	WT_Sample1	213		4.1116	0.7387		0.7349
ABalapaapap	WT_Sample1	200		3.8841		0.7				1
ABalapaapap	WT_Sample1	202		3.8899						1
ABalapaapap	WT_Sample1	203		2.6011		1.0204				1
ABalapaapap	WT_Sample1	205		3.6042						1
ABalapaapap	WT_Sample1	206		2.9102		1.7463				1
ABalapaapap	WT_Sample1	208		2.7935						1
ABalapaapap	WT_Sample1	209		2.4028						1
ABalapaapap	WT_Sample1	210		2.5078						1
ABalapaapap	WT_Sample1	211		2.6244						1
ABalapaapap	WT_Sample1	212		2.6769						1
ABalapaapap	WT_Sample1	213		2.3853	0.7387					1
ABalapaapap	WT_Sample1	214		2.257						1
ABalapaapap	WT_Sample1	215		2.5136	0.6925					1
ABalapaapap	WT_Sample1	216		2.4028						1
ABalapaapap	WT_Sample1	217		2.3795						1
ABalapaapap	WT_Sample1	218		2.8635						1
ABalapaapap	WT_Sample1	219		2.4436						1
ABalapaapap	WT_Sample1	220		2.5486						1
ABalapaapap	WT_Sample1	221		2.5311						1
ABalapaapap	WT_Sample1	222		2.5719						1
ABalapaapap	WT_Sample1	223		2.5369						1
ABalapaapap	WT_Sample1	224		2.5952						1
ABalapaapap	WT_Sample1	225		2.5253						1
ABalapaapap	WT_Sample1	226		2.4553						1
ABalapaapap	WT_Sample1	227		2.4728						1
ABalapaapap	WT_Sample1	228		2.5719						1
ABalapaapap	WT_Sample1	229		3.3884						1
ABalapaapap	WT_Sample1	230		2.8402						1
ABalapaappp	WT_Sample1	207		2.741			0.7811
ABalapaappp	WT_Sample1	215		2.5777		0.7898	0.7942
ABalapaappp	WT_Sample1	243		3.7092			0.7038
ABalapapapp	WT_Sample1	218		3.4467			0.7303
ABalapapapp	WT_Sample1	219		4.3215			0.6618
ABalapapapp	WT_Sample1	220		4.0824			0.6805
ABalapapapp	WT_Sample1	225		4.0824			0.6805
ABalapapapp	WT_Sample1	229		3.1551			0.7531
ABalapapapp	WT_Sample1	230		3.575		0.7239	0.7202
ABalapappap	WT_Sample1	191		2.4903			0.8188
ABalapapppa	WT_Sample1	214		4.409			0.6054
ABalapapppa	WT_Sample1	215		3.1493		0.7192	0.7182
ABalapapppa	WT_Sample1	237		3.2193	0.6349		0.7119
ABalapapppa	WT_Sample1	238		2.7119	0.7214		0.7573
ABalapapppa	WT_Sample1	240		3.5459	0.5223		0.6827
ABalapapppa	WT_Sample1	241		4.2632	0.6571		0.6185
ABalapapppa	WT_Sample1	242		4.234	0.5498		0.6211
ABalapapppa	WT_Sample1	243		2.741	0.5308		0.7547
ABalapapppa	WT_Sample1	244		2.6127	0.5988		0.7662
ABalapapppa	WT_Sample1	245		2.7235	0.6109		0.7563
ABalapapppa	WT_Sample1	254		3.8258	0.5498		0.6576
ABalapapppa	WT_Sample1	255		3.8025	0.556		0.6597
ABalapapppp	WT_Sample1	226		3.7092	0.6207		0.6666
ABalappaapp	WT_Sample1	214		3.9949						1
ABalappaapp	WT_Sample1	215		4.164						1
ABalappaapp	WT_Sample1	216		4.2749						1
ABalappaapp	WT_Sample1	217		4.1874						1
ABalappaapp	WT_Sample1	219		4.2282						1
ABalappaapp	WT_Sample1	221		3.505						1
ABalappaapp	WT_Sample1	222		4.2515						1
ABalappaapp	WT_Sample1	223		3.4234						1
ABalappaapp	WT_Sample1	224		3.8783						1
ABalappaapp	WT_Sample1	225		3.645						1
ABalappaapp	WT_Sample1	226		3.8083						1
ABalappaapp	WT_Sample1	229		4.5081						1
ABalappaapp	WT_Sample1	230		3.8666						1
ABalappaapp	WT_Sample1	232		4.1116	0.4986					1
ABalappaapp	WT_Sample1	233		4.4731	0.6197					1
ABalappaapp	WT_Sample1	235		3.8491						1
ABalappaapp	WT_Sample1	236		4.4615						1
ABalappaapp	WT_Sample1	237		3.5692						1
ABalappaapp	WT_Sample1	238		3.6275						1
ABalappaapp	WT_Sample1	239		4.164						1
ABalappaapp	WT_Sample1	240		3.7908						1
ABalappaapp	WT_Sample1	241		3.1668						1
ABalappaapp	WT_Sample1	242		2.8868						1
ABalappaapp	WT_Sample1	243		2.811						1
ABalappaapp	WT_Sample1	244		2.6827						1
ABalappaapp	WT_Sample1	245		3.2892						1
ABalappaapp	WT_Sample1	246		2.8927						1
ABalappaapp	WT_Sample1	247		2.4903						1
ABalappaapp	WT_Sample1	248		2.6302						1
ABalappaapp	WT_Sample1	249		2.6944						1
ABalappaapp	WT_Sample1	250		3.2018						1
ABalappaapp	WT_Sample1	251		3.2484						1
ABalappaapp	WT_Sample1	252		3.2076						1
ABalappaapp	WT_Sample1	253		3.3826						1
ABalappaapp	WT_Sample1	254		3.1026						1
ABalappaapp	WT_Sample1	255		2.5602						1
ABalappapaa	WT_Sample1	253		4.1174	0.6676		0.58
ABalappapap	WT_Sample1	226		4.5198						1
ABalappapap	WT_Sample1	229		3.4934						1
ABalappapap	WT_Sample1	230		3.5109						1
ABalappapap	WT_Sample1	231		3.4059						1
ABalappapap	WT_Sample1	232		2.5428			0.4865			1
ABalappapap	WT_Sample1	233		2.7877						1
ABalappapap	WT_Sample1	234		2.5719						1
ABalappapap	WT_Sample1	235		2.6944						1
ABalappapap	WT_Sample1	236		2.4844			0.4982			1
ABalappapap	WT_Sample1	237		2.4611			0.5029			1
ABalappapap	WT_Sample1	238		2.4319			0.5088			1
ABalappapap	WT_Sample1	239		2.4786	0.4607		0.4994			1
ABalappapap	WT_Sample1	240		2.4961			0.4959			1
ABalappapap	WT_Sample1	241		2.5136			0.4923			1
ABalappapap	WT_Sample1	242		2.4203			0.5112			1
ABalappapap	WT_Sample1	243		2.3445			0.5265			1
ABalappapap	WT_Sample1	244		2.4494			0.5053			1
ABalappapap	WT_Sample1	245		2.3678			0.5218			1
ABalappapap	WT_Sample1	246		2.4494			0.5053			1
ABalappapap	WT_Sample1	247		2.2628			0.543			1
ABalappapap	WT_Sample1	248		2.5602						1
ABalappapap	WT_Sample1	249		2.5311			0.4888			1
ABalappapap	WT_Sample1	250		2.5311	0.5074		0.4888			1
ABalappapap	WT_Sample1	251		2.4611			0.5029			1
ABalappapap	WT_Sample1	252		2.4786			0.4994			1
ABalappapap	WT_Sample1	253		2.6069	0.6676					1
ABalappapap	WT_Sample1	254		2.6827						1
ABalappapap	WT_Sample1	255		2.7527						1
ABalappappp	WT_Sample1	222		4.4323			0.5914
ABalapppaaa	WT_Sample1	236		2.5311			0.8459
ABalapppaaa	WT_Sample1	237		3.8433	0.5489	0.9499	0.7661
ABalapppapp	WT_Sample1	166		3.9424		1.337	0.6256
ABalappppap	WT_Sample1	204		4.2749			0.6995
ABalappppap	WT_Sample1	212		3.1026			0.7819
ABalappppap	WT_Sample1	224		4.3215			0.6962
ABalpaaaaap	WT_Sample1	211		3.82		0.8087	0.7197
ABalpaaaapp	WT_Sample1	200		2.7177						1
ABalpaaaapp	WT_Sample1	201		2.7877						1
ABalpaaaapp	WT_Sample1	202		3.2251		1.5084				1
ABalpaaaapp	WT_Sample1	204		2.5136						1
ABalpaaaapp	WT_Sample1	205		2.4319		0.9435				1
ABalpaaaapp	WT_Sample1	207		2.5719						1
ABalpaaaapp	WT_Sample1	208		2.6361	0.5543					1
ABalpaaaapp	WT_Sample1	209		2.4319	0.514					1
ABalpaaaapp	WT_Sample1	210		2.4844	0.5632					1
ABalpaaaapp	WT_Sample1	211		2.3328		0.8473				1
ABalpaaaapp	WT_Sample1	214		2.397	0.4666					1
ABalpaaaapp	WT_Sample1	215		2.4028	0.5648					1
ABalpaaaapp	WT_Sample1	216		2.7294	0.6924					1
ABalpaaaapp	WT_Sample1	217		2.2512	0.4733					1
ABalpaaaapp	WT_Sample1	218		2.5836						1
ABalpaaaapp	WT_Sample1	219		2.2978	0.5356					1
ABalpaaaapp	WT_Sample1	220		2.8402	0.5849					1
ABalpaaaapp	WT_Sample1	221		2.7585						1
ABalpaaaapp	WT_Sample1	222		2.6536	0.5954					1
ABalpaaaapp	WT_Sample1	223		2.5486	0.6179					1
ABalpaaaapp	WT_Sample1	224		2.5019						1
ABalpaaaapp	WT_Sample1	225		2.9043	0.6229					1
ABalpaaaapp	WT_Sample1	226		2.3386	0.6618					1
ABalpaaaapp	WT_Sample1	227		2.5602	0.663					1
ABalpaaaapp	WT_Sample1	228		2.2686	0.6565					1
ABalpaaaapp	WT_Sample1	229		2.3561						1
ABalpaaaapp	WT_Sample1	230		2.6594						1
ABalpaaapap	WT_Sample1	209		3.9483	0.4997		0.5289			1
ABalpaaapap	WT_Sample1	210		3.4234	0.4825		0.5915			1
ABalpaaapap	WT_Sample1	211		2.5894	0.5128		0.691			1
ABalpaaapap	WT_Sample1	212		3.0793	0.5122		0.6326			1
ABalpaaapap	WT_Sample1	213		2.846	0.473		0.6604			1
ABalpaaapap	WT_Sample1	214		3.2601			0.611			1
ABalpaaapap	WT_Sample1	215		2.9627	0.5152		0.6465			1
ABalpaaapap	WT_Sample1	216		2.4903	0.5478		0.7029			1
ABalpaaapap	WT_Sample1	217		2.5777	0.5332		0.6924			1
ABalpaaappa	WT_Sample1	206		3.7208						1
ABalpaaappa	WT_Sample1	207		4.0707						1
ABalpaaappa	WT_Sample1	208		3.0676						1
ABalpaaappa	WT_Sample1	209		3.3884						1
ABalpaaappa	WT_Sample1	210		3.5517						1
ABalpaaappa	WT_Sample1	211		3.1901						1
ABalpaaappa	WT_Sample1	212		2.5019	0.4771					1
ABalpaaappa	WT_Sample1	213		2.4961						1
ABalpaaappa	WT_Sample1	214		2.8985	0.5025					1
ABalpaaappa	WT_Sample1	215		2.6769						1
ABalpaaappa	WT_Sample1	216		2.6594	0.4928					1
ABalpaaappa	WT_Sample1	217		2.6594	0.528					1
ABalpaaappa	WT_Sample1	218		2.5019	0.5173					1
ABalpaaappa	WT_Sample1	219		2.5019	0.5342					1
ABalpaaappa	WT_Sample1	220		2.7352	0.577					1
ABalpaaappa	WT_Sample1	221		2.5136	0.4776					1
ABalpaaappa	WT_Sample1	222		2.5311	0.4574					1
ABalpaaappa	WT_Sample1	223		2.5719	0.5193					1
ABalpaaappa	WT_Sample1	224		2.916	0.5781					1
ABalpaaappa	WT_Sample1	225		2.776	0.6612					1
ABalpaaappa	WT_Sample1	226		2.7527	0.5538					1
ABalpaaappa	WT_Sample1	227		2.5019						1
ABalpaaappa	WT_Sample1	228		2.5544	0.5412					1
ABalpaaappa	WT_Sample1	229		2.6886	0.5052					1
ABalpaaappa	WT_Sample1	230		2.5602	0.5264					1
ABalpaaappa	WT_Sample1	231		3.0151	0.6223					1
ABalpaaappa	WT_Sample1	232		3.8025	0.6241					1
ABalpaaappa	WT_Sample1	233		2.7235	0.6608					1
ABalpaappap	WT_Sample1	217		3.3476	0.5701		0.7657
ABalpaappap	WT_Sample1	222		4.4323			0.6898
ABalpaappap	WT_Sample1	223		2.5486	0.4583		0.8216
ABalpaappap	WT_Sample1	224		4.2224	0.5373	0.9914	0.7045
ABalpaappap	WT_Sample1	233		3.5692	0.59		0.7502
ABalpaappap	WT_Sample1	234		3.6683			0.7433
ABalpaapppp	WT_Sample1	240		3.0093	0.5342	1.3636	0.8592
ABalpapaaaa	WT_Sample1	220		3.2776			0.7506
ABalpapaaaa	WT_Sample1	221		3.5575			0.7292
ABalpapaaaa	WT_Sample1	226		3.6858			0.7195
ABalpapaaaa	WT_Sample1	227		3.4525		0.7603	0.7372
ABalpapaaaa	WT_Sample1	255		2.846			0.7834
ABalpapaapa	WT_Sample1	241		4.0066		0.7881	0.7811
ABalpapaapp	WT_Sample1	209		4.1524	0.5142					1
ABalpapaapp	WT_Sample1	210		2.776			0.5285			1
ABalpapaapp	WT_Sample1	211		3.0968						1
ABalpapaapp	WT_Sample1	212		3.0793						1
ABalpapaapp	WT_Sample1	213		3.0268			0.4859			1
ABalpapaapp	WT_Sample1	214		2.8985			0.5077			1
ABalpapaapp	WT_Sample1	215		4.4323						1
ABalpapaapp	WT_Sample1	216		2.9568			0.4978			1
ABalpapaapp	WT_Sample1	217		2.8518			0.5156			1
ABalpapaapp	WT_Sample1	218		2.7527			0.5324			1
ABalpapaapp	WT_Sample1	219		2.8868			0.5097			1
ABalpapaapp	WT_Sample1	220		2.7235	0.6155		0.5374			1
ABalpapaapp	WT_Sample1	221		3.505						1
ABalpapaapp	WT_Sample1	222		3.0735						1
ABalpapaapp	WT_Sample1	223		2.6244			0.5542			1
ABalpapaapp	WT_Sample1	224		2.4844			0.578			1
ABalpapaapp	WT_Sample1	225		2.4553			0.583			1
ABalpapaapp	WT_Sample1	226		2.6244			0.5542			1
ABalpapaapp	WT_Sample1	227		3.5867						1
ABalpapaapp	WT_Sample1	228		3.4934						1
ABalpapaapp	WT_Sample1	229		2.8693			0.5126			1
ABalpapaapp	WT_Sample1	230		2.5836			0.5612			1
ABalpapaapp	WT_Sample1	231		2.7877			0.5265			1
ABalpapaapp	WT_Sample1	232		2.7294			0.5364			1
ABalpapappa	WT_Sample1	202		4.269						1
ABalpapappa	WT_Sample1	203		4.2749						1
ABalpapappa	WT_Sample1	204		4.0241						1
ABalpapappa	WT_Sample1	205		3.6917						1
ABalpapappa	WT_Sample1	206		3.2076			0.5228			1
ABalpapappa	WT_Sample1	207		2.9918			0.5549			1
ABalpapappa	WT_Sample1	208		3.0443			0.5471			1
ABalpapappa	WT_Sample1	209		2.8344	0.4617		0.5783			1
ABalpapappa	WT_Sample1	210		2.4669			0.633			1
ABalpapappa	WT_Sample1	211		2.3095			0.6564			1
ABalpapappa	WT_Sample1	212		2.3211			0.6547			1
ABalpapappa	WT_Sample1	213		2.397			0.6434			1
ABalpapappa	WT_Sample1	214		2.5486	0.5692		0.6208			1
ABalpapappa	WT_Sample1	215		2.5136	0.5342		0.626			1
ABalpapappa	WT_Sample1	216		2.5894	0.4978		0.6148			1
ABalpapappa	WT_Sample1	217		2.2337	0.5354		0.6677			1
ABalpapappa	WT_Sample1	218		2.2686	0.5236		0.6625			1
ABalpapappa	WT_Sample1	219		2.3911	0.5005		0.6443			1
ABalpapappa	WT_Sample1	220		2.3911			0.6443			1
ABalpapappa	WT_Sample1	221		2.3561	0.4751		0.6495			1
ABalpapappa	WT_Sample1	222		2.2686	0.5193		0.6625			1
ABalpapappp	WT_Sample1	182		4.514	0.4744		0.6861
ABalpappaaa	WT_Sample1	181		3.3067						1
ABalpappaaa	WT_Sample1	182		3.0443						1
ABalpappaaa	WT_Sample1	183		2.8635						1
ABalpappaaa	WT_Sample1	184		2.8927						1
ABalpappaaa	WT_Sample1	185		3.0793						1
ABalpappaaa	WT_Sample1	186		2.9393						1
ABalpappaaa	WT_Sample1	187		2.6769						1
ABalpappaaa	WT_Sample1	188		2.6477						1
ABalpappaaa	WT_Sample1	189		2.8285						1
ABalpappaaa	WT_Sample1	190		3.1318						1
ABalpappaaa	WT_Sample1	191		3.2834						1
ABalpappaaa	WT_Sample1	192		3.5167						1
ABalpappaaa	WT_Sample1	193		3.1085						1
ABalpappaaa	WT_Sample1	194		4.3215		2.9972				1
ABalpappaaa	WT_Sample1	198		3.6275						1
ABalpappaaa	WT_Sample1	199		3.4934						1
ABalpappaaa	WT_Sample1	200		3.5342						1
ABalpappaaa	WT_Sample1	201		2.7935						1
ABalpappaaa	WT_Sample1	202		2.4669						1
ABalpappaaa	WT_Sample1	203		2.5777						1
ABalpappaaa	WT_Sample1	204		2.776						1
ABalpappaaa	WT_Sample1	205		2.5661						1
ABalpappaaa	WT_Sample1	206		2.5894						1
ABalpappaaa	WT_Sample1	207		2.3795						1
ABalpappaaa	WT_Sample1	208		2.3036						1
ABalpappaaa	WT_Sample1	209		2.3561						1
ABalpappaaa	WT_Sample1	210		2.7177						1
ABalpappaaa	WT_Sample1	211		2.3445						1
ABalpappaaa	WT_Sample1	212		2.4261						1
ABalpappaaa	WT_Sample1	213		2.4086						1
ABalpappaaa	WT_Sample1	214		2.1928						1
ABalpappaaa	WT_Sample1	215		2.9976						1
ABalpappaaa	WT_Sample1	216		3.9599						1
ABalpappaaa	WT_Sample1	217		2.327						1
ABalpappaaa	WT_Sample1	218		2.5777						1
ABalpapppap	WT_Sample1	205		2.4203	0.542					1
ABalpapppap	WT_Sample1	206		2.1987	0.4842					1
ABalpapppap	WT_Sample1	207		2.2803						1
ABalpapppap	WT_Sample1	208		2.2045						1
ABalpapppap	WT_Sample1	209		2.4494	0.5141					1
ABalpapppap	WT_Sample1	210		2.2628						1
ABalpapppap	WT_Sample1	211		2.2628	0.4786					1
ABalpapppap	WT_Sample1	212		2.4494	0.5779					1
ABalpapppap	WT_Sample1	213		2.3036	0.5821					1
ABalpapppap	WT_Sample1	214		2.3328	0.5813					1
ABalpapppap	WT_Sample1	215		2.4553	0.6329					1
ABalpapppap	WT_Sample1	216		2.5602	0.6374					1
ABalpapppap	WT_Sample1	217		2.4611	0.6138					1
ABalpapppap	WT_Sample1	218		2.397	0.6187					1
ABalpapppap	WT_Sample1	219		2.2803	0.6546					1
ABalpapppap	WT_Sample1	220		2.4028	0.6181					1
ABalpapppap	WT_Sample1	221		2.3736	0.6332					1
ABalpapppap	WT_Sample1	222		2.5602	0.655					1
ABalpapppap	WT_Sample1	223		2.2803	0.5849					1
ABalpapppap	WT_Sample1	224		2.3328	0.6164					1
ABalpapppap	WT_Sample1	225		2.741	0.6021					1
ABalpapppap	WT_Sample1	226		2.5719	0.6869					1
ABalpapppap	WT_Sample1	227		2.5777	0.6727					1
ABalpapppap	WT_Sample1	228		2.5777	0.6153					1
ABalpapppap	WT_Sample1	229		2.327	0.6393					1
ABalpapppap	WT_Sample1	230		2.6827	0.5855	1.0724				1
ABalpapppap	WT_Sample1	232		2.6477	0.5515					1
ABalpapppap	WT_Sample1	233		2.5777	0.532	3.7602				1
ABalpapppap	WT_Sample1	235		3.3534	0.4986					1
ABalppaappa	WT_Sample1	230		3.0735		0.7774	0.7488			1
ABalppaappa	WT_Sample1	240		3.9016	0.6574		0.6811			1
ABalppaappa	WT_Sample1	241		3.5925	0.5257		0.7064			1
ABalppaappa	WT_Sample1	242		3.7266	0.6407		0.6954			1
ABalppaappa	WT_Sample1	243		3.6625	0.7537		0.7007			1
ABalppaappa	WT_Sample1	244		3.7383	0.5774		0.6945			1
ABalppaappa	WT_Sample1	245		3.5692	0.6489		0.7083			1
ABalppaappa	WT_Sample1	246		3.5225	0.7602		0.7121			1
ABalppaappa	WT_Sample1	247		3.5692	0.605		0.7083			1
ABalppaappa	WT_Sample1	249		3.8899	0.6593		0.6821			1
ABalppaappa	WT_Sample1	250		4.1699	0.7189		0.6592			1
ABalppaappp	WT_Sample1	243		2.9452	0.7537		0.8044
ABalppaappp	WT_Sample1	246		2.9102	0.7602		0.8067
ABalppaappp	WT_Sample1	248		3.0035	0.6302		0.8005
ABalppaappp	WT_Sample1	250		3.3709	0.7189		0.7761
ABalppaappp	WT_Sample1	252		3.4292	0.6383		0.7723
ABalppaappp	WT_Sample1	254		3.0151	0.6828		0.7998
ABalppapaaa	WT_Sample1	182		2.4728			0.8209
ABalppapaaa	WT_Sample1	183		2.327			0.8315
ABalppapapp	WT_Sample1	198		4.3507			0.7339
ABalppapapp	WT_Sample1	228		3.2134		1.4813	0.8034
ABalppapppp	WT_Sample1	226		3.7266			0.7421
ABalppapppp	WT_Sample1	227		4.2224			0.7078
ABalpppaaaa	WT_Sample1	187		2.6361	0.5972	0.8304	0.8292
ABalpppaaap	WT_Sample1	204		3.1959			0.6435
ABalpppaaap	WT_Sample1	232		3.5575			0.6031
ABalpppaaap	WT_Sample1	233		3.6858			0.5888
ABalpppaaap	WT_Sample1	234		3.2834			0.6337
ABalpppaaap	WT_Sample1	235		4.0882			0.5439
ABalpppaaap	WT_Sample1	236		4.4615			0.5023
ABalpppaaap	WT_Sample1	237		3.9249			0.5621
ABalpppaaap	WT_Sample1	238		3.1318			0.6506
ABalpppaaap	WT_Sample1	239		2.5836			0.7118
ABalpppaaap	WT_Sample1	240		2.3445			0.7385
ABalpppaaap	WT_Sample1	243		2.5078			0.7202
ABalpppaaap	WT_Sample1	244		3.7791			0.5784
ABalpppaaap	WT_Sample1	246		2.9452		0.812	0.6714
ABalpppaaap	WT_Sample1	252		3.68		0.8471	0.5895
ABalpppaapd	WT_Sample1	207		3.0618	0.5057		0.6344
ABalpppaapd	WT_Sample1	208		4.2224	0.5034		0.4958
ABalpppaapd	WT_Sample1	209		4.0707			0.5139
ABalpppaapd	WT_Sample1	211		4.234	0.4622		0.4944
ABalpppaapd	WT_Sample1	212		3.9716	0.5562		0.5258
ABalpppaapd	WT_Sample1	233		3.2076	0.6634	1.2876	0.617
ABalpppaapd	WT_Sample1	238		4.3623	0.6082
ABalpppaapd	WT_Sample1	239		3.8141	0.6321	0.8788	0.5446
ABalpppaapv	WT_Sample1	229		3.3651			0.5819			1
ABalpppaapv	WT_Sample1	230		3.4875			0.5667			1
ABalpppaapv	WT_Sample1	231		4.1524			0.4841			1
ABalpppaapv	WT_Sample1	232		3.9249			0.5123			1
ABalpppaapv	WT_Sample1	233		3.5167	0.6634		0.563			1
ABalpppaapv	WT_Sample1	234		3.2951			0.5906			1
ABalpppaapv	WT_Sample1	235		3.056			0.6203			1
ABalpppaapv	WT_Sample1	236		2.7994			0.6522			1
ABalpppaapv	WT_Sample1	237		2.6886	0.6242		0.6659			1
ABalpppaapv	WT_Sample1	238		3.4642	0.6082		0.5696			1
ABalpppaapv	WT_Sample1	239		3.5342	0.6321		0.5609			1
ABalpppaapv	WT_Sample1	240		2.6536			0.6703			1
ABalpppaapv	WT_Sample1	241		3.1434			0.6094			1
ABalpppaapv	WT_Sample1	242		3.1609			0.6072			1
ABalpppaapv	WT_Sample1	243		3.5925			0.5536			1
ABalpppaapv	WT_Sample1	244		3.4525			0.571			1
ABalpppaapv	WT_Sample1	245		2.7644	0.4669		0.6565			1
ABalpppapad	WT_Sample1	192		3.3884			0.7369
ABalpppapad	WT_Sample1	193		2.7002			0.7904
ABalpppapad	WT_Sample1	194		3.1493			0.7555
ABalpppapad	WT_Sample1	199		3.0968			0.7596
ABalpppapad	WT_Sample1	200		3.2134			0.7505
ABalpppapad	WT_Sample1	201		3.7733			0.707
ABalpppappa	WT_Sample1	175		4.4498						1
ABalpppappa	WT_Sample1	187		3.6975						1
ABalpppappa	WT_Sample1	189		2.5894			0.5244			1
ABalpppappa	WT_Sample1	194		4.3215		0.9523				1
ABalpppappa	WT_Sample1	196		3.3301						1
ABalpppappa	WT_Sample1	197		3.1901						1
ABalpppappa	WT_Sample1	198		2.1753			0.6004			1
ABalppppaad	WT_Sample1	219		2.5602	0.8532		0.8705
ABalppppaad	WT_Sample1	220		4.1232	0.8077		0.7914
ABalppppaav	WT_Sample1	189		3.8141						1
ABalppppaav	WT_Sample1	190		2.6536						1
ABalppppaav	WT_Sample1	191		2.8927						1
ABalppppaav	WT_Sample1	192		2.8693						1
ABalppppaav	WT_Sample1	193		2.4669						1
ABalppppaav	WT_Sample1	194		2.6302						1
ABalppppaav	WT_Sample1	195		2.5894						1
ABalppppaav	WT_Sample1	196		3.47						1
ABalppppaav	WT_Sample1	197		2.8344						1
ABalppppaav	WT_Sample1	198		2.776						1
ABalppppaav	WT_Sample1	199		2.5952						1
ABalppppaav	WT_Sample1	200		2.916						1
ABalppppaav	WT_Sample1	201		3.1085						1
ABalppppaav	WT_Sample1	202		2.7644						1
ABalppppaav	WT_Sample1	203		2.6944						1
ABalppppaav	WT_Sample1	204		2.6302						1
ABalppppaav	WT_Sample1	205		2.4086						1
ABalppppaav	WT_Sample1	206		2.4961	0.5271					1
ABalppppaav	WT_Sample1	207		2.4611						1
ABalppppaav	WT_Sample1	208		2.3445	0.5807					1
ABalppppaav	WT_Sample1	209		2.3386						1
ABalppppaav	WT_Sample1	210		2.1753						1
ABalppppaav	WT_Sample1	211		2.187						1
ABalppppaav	WT_Sample1	212		2.222	0.5296					1
ABalppppaav	WT_Sample1	213		2.3328	0.5287					1
ABalppppaav	WT_Sample1	214		2.1403						1
ABalppppaav	WT_Sample1	215		2.187						1
ABalppppaav	WT_Sample1	216		2.2103						1
ABalppppaav	WT_Sample1	217		2.257						1
ABalppppaav	WT_Sample1	218		3.2134	0.5861					1
ABalppppaav	WT_Sample1	219		2.2103	0.8532					1
ABalppppaav	WT_Sample1	220		2.1287	0.8077					1
ABalppppaav	WT_Sample1	221		2.4203	0.4856					1
ABalppppaav	WT_Sample1	222		2.3795	0.456					1
ABalppppapp	WT_Sample1	185		2.9627						1
ABalppppapp	WT_Sample1	186		2.7235						1
ABalppppapp	WT_Sample1	187		2.6361						1
ABalppppapp	WT_Sample1	188		3.6975						1
ABalppppapp	WT_Sample1	189		2.4553						1
ABalppppapp	WT_Sample1	190		2.2803						1
ABalppppapp	WT_Sample1	191		2.2278						1
ABalppppapp	WT_Sample1	192		2.4728						1
ABalppppapp	WT_Sample1	193		2.5428						1
ABalppppapp	WT_Sample1	194		2.706						1
ABalppppapp	WT_Sample1	195		3.3534						1
ABalppppapp	WT_Sample1	196		4.2165						1
ABalppppapp	WT_Sample1	197		3.021						1
ABalppppapp	WT_Sample1	198		3.2309						1
ABalppppapp	WT_Sample1	199		3.4817						1
ABalppppapp	WT_Sample1	200		2.4203						1
ABalppppapp	WT_Sample1	201		3.0443		3.864				1
ABalppppapp	WT_Sample1	203		3.0501						1
ABalppppapp	WT_Sample1	204		2.5544						1
ABalppppapp	WT_Sample1	205		2.8052						1
ABalppppapp	WT_Sample1	206		2.881	0.5853					1
ABalppppapp	WT_Sample1	207		2.6361						1
ABalppppapp	WT_Sample1	208		2.4494						1
ABalppppapp	WT_Sample1	209		2.4553						1
ABalppppapp	WT_Sample1	210		2.6477	0.5366					1
ABalppppapp	WT_Sample1	211		2.4144						1
ABalppppapp	WT_Sample1	212		2.3036						1
ABalppppapp	WT_Sample1	213		2.3211						1
ABaraaaaaap	WT_Sample1	233		3.2368			0.7438
ABaraaaaapp	WT_Sample1	246		3.2776	0.5568		0.7825
ABaraaaapaa	WT_Sample1	217		4.4032						1
ABaraaaapaa	WT_Sample1	218		2.7469						1
ABaraaaapaa	WT_Sample1	219		2.986	0.5561					1
ABaraaaapaa	WT_Sample1	220		3.7092						1
ABaraaaapaa	WT_Sample1	222		2.4728						1
ABaraaaapaa	WT_Sample1	223		2.4261	0.458					1
ABaraaaapaa	WT_Sample1	224		2.3911	0.4653					1
ABaraaaapaa	WT_Sample1	225		3.5109						1
ABaraaaapaa	WT_Sample1	226		2.9335	0.4911					1
ABaraaaapaa	WT_Sample1	227		2.6419	0.5317					1
ABaraaaapaa	WT_Sample1	228		2.5836	0.6492					1
ABaraaaapaa	WT_Sample1	229		2.4319	0.6035					1
ABaraaaapaa	WT_Sample1	230		2.4436	0.6302					1
ABaraaaapaa	WT_Sample1	231		2.4728	0.5427					1
ABaraaaapaa	WT_Sample1	232		2.5602	0.5495					1
ABaraaaapaa	WT_Sample1	233		2.4961						1
ABaraaaapaa	WT_Sample1	234		2.8344						1
ABaraaaapaa	WT_Sample1	235		2.7877						1
ABaraaaapaa	WT_Sample1	236		2.741						1
ABaraaaapaa	WT_Sample1	237		2.7877						1
ABaraaaapaa	WT_Sample1	238		2.5719						1
ABaraaaapaa	WT_Sample1	239		2.8402						1
ABaraaaapaa	WT_Sample1	240		2.9452						1
ABaraaaapaa	WT_Sample1	241		2.5136						1
ABaraaaapaa	WT_Sample1	242		2.5952	0.5127					1
ABaraaaapaa	WT_Sample1	243		2.9218						1
ABaraaaapaa	WT_Sample1	244		2.8635						1
ABaraaaapaa	WT_Sample1	245		2.951						1
ABaraaaapaa	WT_Sample1	246		2.9802						1
ABaraaaapaa	WT_Sample1	247		2.8227						1
ABaraaaapaa	WT_Sample1	248		3.0093						1
ABaraaaapaa	WT_Sample1	249		3.0968						1
ABaraaaapaa	WT_Sample1	250		3.4584						1
ABaraaaapaa	WT_Sample1	251		2.9218						1
ABaraaaapaa	WT_Sample1	252		2.8693						1
ABaraaapaap	WT_Sample1	216		2.4028	0.557	0.7004	0.907
ABaraaapapp	WT_Sample1	224		2.6944			0.8753
ABaraaapapp	WT_Sample1	234		2.8169		0.6677	0.8696
ABaraaappaa	WT_Sample1	200		2.257		0.7096	0.8546
ABaraaappap	WT_Sample1	231		3.3534			0.777
ABaraaapppa	WT_Sample1	190		2.6069		1.1058	0.8517
ABaraaapppa	WT_Sample1	227		2.7644		0.9536	0.8427
ABaraapaaaa	WT_Sample1	238		3.4759	0.5647		0.8172
ABaraapaaap	WT_Sample1	211		4.2924		0.7104	0.5216
ABaraapaaap	WT_Sample1	216		4.0532			0.5483
ABaraapaaap	WT_Sample1	227		2.3445			0.7387
ABaraapaaap	WT_Sample1	228		2.6652			0.703
ABaraapaaap	WT_Sample1	229		2.1928			0.7556
ABaraapaaap	WT_Sample1	230		2.1753			0.7576
ABaraapaaap	WT_Sample1	231		2.2162			0.753
ABaraapaaap	WT_Sample1	232		2.6652			0.703
ABaraapaaap	WT_Sample1	234		4.0124			0.5528
ABaraapaaap	WT_Sample1	236		3.1085			0.6536
ABaraapaapa	WT_Sample1	190		2.2686		0.67	0.8295
ABaraapapap	WT_Sample1	217		2.3153		1.3202	0.9104
ABaraappaaa	WT_Sample1	199		2.3911	0.6267	0.676	0.7793
ABaraappaaa	WT_Sample1	246		4.2224		0.965	0.6103
ABaraappaap	WT_Sample1	223		2.3153	0.5451		0.7337
ABarapaaapa	WT_Sample1	205		3.2776	0.5006	0.8756	0.7839
ABarapaaapa	WT_Sample1	210		4.2982	0.7682		0.7166
ABarapaaapa	WT_Sample1	211		3.6042	0.7917		0.7624
ABarapaaapp	WT_Sample1	207		3.2834	0.5183					1
ABarapaaapp	WT_Sample1	208		2.9743	0.6079					1
ABarapaaapp	WT_Sample1	209		2.6711	0.5703					1
ABarapaaapp	WT_Sample1	210		2.6594	0.7682					1
ABarapaaapp	WT_Sample1	211		2.6477	0.7917					1
ABarapaaapp	WT_Sample1	212		2.3386	0.5103					1
ABarapaaapp	WT_Sample1	213		2.5836						1
ABarapaaapp	WT_Sample1	214		2.5019	0.7046					1
ABarapaaapp	WT_Sample1	215		2.7702						1
ABarapaaapp	WT_Sample1	216		2.5894						1
ABarapaaapp	WT_Sample1	217		3.0268	0.4948					1
ABarapaaapp	WT_Sample1	218		2.9743	0.4918					1
ABarapaaapp	WT_Sample1	219		2.8344	0.5154					1
ABarapaaapp	WT_Sample1	222		3.2368	0.6024					1
ABarapaaapp	WT_Sample1	223		3.645	0.618					1
ABarapaaapp	WT_Sample1	224		3.0968	0.5565					1
ABarapaaapp	WT_Sample1	225		2.4319	0.6182					1
ABarapaaapp	WT_Sample1	226		2.4144	0.6086					1
ABarapaaapp	WT_Sample1	227		2.5777	0.4854					1
ABarapaaapp	WT_Sample1	228		2.4961						1
ABarapaaapp	WT_Sample1	229		3.6042						1
ABarapaaapp	WT_Sample1	230		2.4553	0.5086					1
ABarapaaapp	WT_Sample1	231		2.5661						1
ABarapaaapp	WT_Sample1	232		2.6944	0.4817					1
ABarapaapaa	WT_Sample1	195		2.5136	0.5553	1.1808	0.8109
ABarapaapap	WT_Sample1	205		2.9918						1
ABarapaapap	WT_Sample1	206		3.0268						1
ABarapaapap	WT_Sample1	207		2.3795						1
ABarapaapap	WT_Sample1	208		2.3795						1
ABarapaapap	WT_Sample1	209		2.4028						1
ABarapaapap	WT_Sample1	210		2.2861						1
ABarapaapap	WT_Sample1	211		2.292						1
ABarapaapap	WT_Sample1	212		2.8985	0.6142					1
ABarapaapap	WT_Sample1	213		2.4728	0.5035					1
ABarapaapap	WT_Sample1	214		2.5836	0.4746	2.8967				1
ABarapaapap	WT_Sample1	216		2.8169	0.529					1
ABarapaapap	WT_Sample1	217		2.9393	0.5074					1
ABarapaapap	WT_Sample1	218		2.8693	0.5261					1
ABarapaapap	WT_Sample1	219		2.986	0.5017					1
ABarapaapap	WT_Sample1	220		2.5777	0.5046					1
ABarapaapap	WT_Sample1	221		2.4144	0.4665					1
ABarapaapap	WT_Sample1	222		2.4786	0.47					1
ABarapaapap	WT_Sample1	223		2.8868	0.4994					1
ABarapaapap	WT_Sample1	224		2.4669	0.6158					1
ABarapaapap	WT_Sample1	225		2.6069	0.5636					1
ABarapaapap	WT_Sample1	226		2.6011	0.5699					1
ABarapaapap	WT_Sample1	227		2.397	0.5366					1
ABarapaapap	WT_Sample1	228		2.4669	0.4829					1
ABarapaapap	WT_Sample1	229		2.4378	0.5077					1
ABarapaapap	WT_Sample1	230		2.6886	0.6215					1
ABarapaappa	WT_Sample1	248		2.4611	0.7428	0.7737	0.9361
ABarapapaaa	WT_Sample1	191		4.3857						1
ABarapapaaa	WT_Sample1	193		3.785						1
ABarapapaaa	WT_Sample1	194		2.776						1
ABarapapaaa	WT_Sample1	195		2.811						1
ABarapapaaa	WT_Sample1	196		2.4203						1
ABarapapaaa	WT_Sample1	197		2.846						1
ABarapapaaa	WT_Sample1	198		2.776						1
ABarapapaaa	WT_Sample1	199		2.6944						1
ABarapapaaa	WT_Sample1	200		2.7935						1
ABarapapaaa	WT_Sample1	201		2.5428						1
ABarapapaaa	WT_Sample1	202		2.5661						1
ABarapapaaa	WT_Sample1	203		2.6944		6.2733				1
ABarapapaaa	WT_Sample1	205		2.4028						1
ABarapapaaa	WT_Sample1	206		2.292						1
ABarapapaaa	WT_Sample1	207		2.3153						1
ABarapapaaa	WT_Sample1	208		2.2337						1
ABarapapaaa	WT_Sample1	209		2.257						1
ABarapapaaa	WT_Sample1	210		2.916						1
ABarapapaaa	WT_Sample1	211		4.234		4.5318				1
ABarapapaaa	WT_Sample1	214		2.292						1
ABarapapaaa	WT_Sample1	215		2.2162			0.4858			1
ABarapapaaa	WT_Sample1	216		2.6302						1
ABarapapaaa	WT_Sample1	217		2.776						1
ABarapapaaa	WT_Sample1	218		2.7294						1
ABarapappap	WT_Sample1	220		4.4382	0.5597		0.6903			1
ABarapappap	WT_Sample1	221		4.0824	0.5943		0.7152			1
ABarapappap	WT_Sample1	222		3.2601	0.5956		0.7725			1
ABarapappap	WT_Sample1	223		2.8693	0.6294		0.7998			1
ABarapappap	WT_Sample1	224		3.61	0.6003		0.7481			1
ABarapappap	WT_Sample1	225		3.6858	0.621		0.7428			1
ABarapappap	WT_Sample1	226		3.9249	0.6527		0.7261			1
ABarapappap	WT_Sample1	227		3.3359	0.6399		0.7672			1
ABarapappap	WT_Sample1	228		4.2574	0.5897		0.703			1
ABarapappap	WT_Sample1	229		3.2834	0.6428		0.7709			1
ABarapappap	WT_Sample1	230		3.0268	0.6194		0.7888			1
ABarapappap	WT_Sample1	231		3.1726	0.6258		0.7786			1
ABarapappap	WT_Sample1	232		3.0793	0.6503		0.7851			1
ABarapappap	WT_Sample1	233		2.8344	0.7123		0.8022			1
ABarapappap	WT_Sample1	234		2.7294	0.6619		0.8096			1
ABarappaaaa	WT_Sample1	216		2.8227			0.7938
ABarappaaaa	WT_Sample1	225		2.7469	0.7631	0.7627	0.7993
ABarappaaaa	WT_Sample1	235		2.8577	0.7906		0.7912
ABarappaaap	WT_Sample1	202		4.1932		1.1724				1
ABarappaaap	WT_Sample1	219		3.855	0.6565					1
ABarappaaap	WT_Sample1	220		3.9366	0.5158					1
ABarappaaap	WT_Sample1	221		3.7558	0.5334					1
ABarappaaap	WT_Sample1	223		4.3565	0.6395					1
ABarappaaap	WT_Sample1	225		4.0766	0.7631					1
ABarappaaap	WT_Sample1	226		3.9658						1
ABarappaaap	WT_Sample1	227		3.8841						1
ABarappaaap	WT_Sample1	228		3.8958						1
ABarappaaap	WT_Sample1	229		3.4001	0.6774		0.5026			1
ABarappaaap	WT_Sample1	230		3.9366						1
ABarappaaap	WT_Sample1	231		4.0532	0.5302					1
ABarappaaap	WT_Sample1	232		3.2543	0.4771		0.5239			1
ABarappaaap	WT_Sample1	233		3.2776	0.5387		0.5205			1
ABarappaaap	WT_Sample1	234		3.3651	0.5099		0.5077			1
ABarappaaap	WT_Sample1	235		3.1726	0.7906		0.5358			1
ABarappaaap	WT_Sample1	236		2.881	0.6371		0.5785			1
ABarappaaap	WT_Sample1	237		2.7585	0.6274		0.5964			1
ABarappaaap	WT_Sample1	238		2.8285	0.6203		0.5862			1
ABarappaaap	WT_Sample1	239		2.7235			0.6015			1
ABarappaaap	WT_Sample1	240		2.9802			0.564			1
ABarappaaap	WT_Sample1	241		2.5428	0.5836		0.628			1
ABarappaaap	WT_Sample1	242		3.3417	0.5043		0.5111			1
ABarappaaap	WT_Sample1	244		3.0151	0.5808		0.5589			1
ABarappaaap	WT_Sample1	247		2.9043			0.5751			1
ABarappaaap	WT_Sample1	248		3.0443	0.5302		0.5546			1
ABarappaaap	WT_Sample1	249		2.5777	0.6468		0.6229			1
ABarappaapp	WT_Sample1	205		4.3448						1
ABarappaapp	WT_Sample1	206		3.0501						1
ABarappaapp	WT_Sample1	207		2.846						1
ABarappaapp	WT_Sample1	208		2.9277						1
ABarappaapp	WT_Sample1	209		3.4176						1
ABarappaapp	WT_Sample1	210		3.7733						1
ABarappaapp	WT_Sample1	211		4.3973						1
ABarappaapp	WT_Sample1	212		2.8227						1
ABarappaapp	WT_Sample1	213		2.6361						1
ABarappaapp	WT_Sample1	214		2.4086						1
ABarappaapp	WT_Sample1	215		2.9685						1
ABarappaapp	WT_Sample1	216		3.091						1
ABarappaapp	WT_Sample1	217		2.2861						1
ABarappaapp	WT_Sample1	218		2.4553						1
ABarappaapp	WT_Sample1	219		3.0443						1
ABarappaapp	WT_Sample1	220		4.0532						1
ABarappaapp	WT_Sample1	221		2.7702						1
ABarappaapp	WT_Sample1	222		2.4319						1
ABarappaapp	WT_Sample1	223		2.5836						1
ABarappaapp	WT_Sample1	224		2.5019		0.7514				1
ABarappaapp	WT_Sample1	226		2.4494						1
ABarappaapp	WT_Sample1	227		2.5136						1
ABarappaapp	WT_Sample1	228		2.6711						1
ABarappaapp	WT_Sample1	229		2.5544						1
ABarappaapp	WT_Sample1	230		2.5253						1
ABarapppapa	WT_Sample1	221		4.0591			0.6986
ABarapppapa	WT_Sample1	222		3.6975		0.6977	0.7254
ABarapppapp	WT_Sample1	202		2.4436	0.5355		0.8547
ABarapppapp	WT_Sample1	207		3.6742	0.5087		0.7815
ABarappppaa	WT_Sample1	222		2.8285	0.6098		0.7921
ABarappppap	WT_Sample1	225		3.75	0.6861		0.791
ABarapppppp	WT_Sample1	225		4.1524			0.6988
ABarapppppp	WT_Sample1	226		3.575			0.7407
ABarpaaaaal	WT_Sample1	207		4.4382	0.5073		0.4842
ABarpaaaaar	WT_Sample1	215		4.5198
ABarpaaaaar	WT_Sample1	218		3.6683	0.5261		0.5191
ABarpaaaaar	WT_Sample1	250		4.0999
ABarpaaaapa	WT_Sample1	215		4.4032			0.5569
ABarpaaapaa	WT_Sample1	218		3.3417	0.5033	0.7007	0.6205
ABarpapaaaa	WT_Sample1	237		3.0326			0.7108
ABarpapaapa	WT_Sample1	181		3.0093						1
ABarpapaapa	WT_Sample1	182		3.2193						1
ABarpapaapa	WT_Sample1	183		2.8285						1
ABarpapaapa	WT_Sample1	184		2.6244						1
ABarpapaapa	WT_Sample1	185		2.6244						1
ABarpapaapa	WT_Sample1	186		2.7644						1
ABarpapaapa	WT_Sample1	187		2.5078						1
ABarpapaapa	WT_Sample1	188		2.4669						1
ABarpapaapa	WT_Sample1	189		2.3386						1
ABarpapaapa	WT_Sample1	190		2.5311						1
ABarpapaapa	WT_Sample1	191		2.5078						1
ABarpapaapa	WT_Sample1	192		2.5544						1
ABarpapaapa	WT_Sample1	193		2.8693						1
ABarpapaapa	WT_Sample1	194		2.5894						1
ABarpapaapa	WT_Sample1	195		2.7994		0.7718				1
ABarpapaapa	WT_Sample1	197		3.2368						1
ABarpapaapa	WT_Sample1	198		2.6711						1
ABarpapaapa	WT_Sample1	199		3.0443						1
ABarpapaapa	WT_Sample1	200		3.1784						1
ABarpapaapa	WT_Sample1	201		2.7644						1
ABarpapaapa	WT_Sample1	202		2.3328						1
ABarpapaapa	WT_Sample1	203		2.5486						1
ABarpapaapa	WT_Sample1	204		2.3386						1
ABarpapaapa	WT_Sample1	205		2.3853						1
ABarpapaapa	WT_Sample1	206		2.3445						1
ABplaaaaaaa	WT_Sample1	227		4.0241			0.6009
ABplaaaaaaa	WT_Sample1	229		4.3623	0.5793		0.5674
ABplaaaaaaa	WT_Sample1	230		4.3565	0.5666		0.568
ABplaaaaaaa	WT_Sample1	231		2.5952	0.7037		0.7426
ABplaaaaaaa	WT_Sample1	232		3.126	0.6882		0.69
ABplaaaaaaa	WT_Sample1	233		3.9949	0.5386		0.6038
ABplaaaaaaa	WT_Sample1	243		3.2543	0.4567		0.6773
ABplaaaaaaa	WT_Sample1	244		4.199			0.5836
ABplaaaaaaa	WT_Sample1	245		3.4467			0.6582
ABplaaaaaaa	WT_Sample1	246		3.5925			0.6437
ABplaaaaaaa	WT_Sample1	247		3.7266			0.6304
ABplaaaaaaa	WT_Sample1	249		3.9074			0.6125
ABplaaaaaap	WT_Sample1	213		3.1901			0.6415			1
ABplaaaaaap	WT_Sample1	229		4.4965	0.5793		0.4948			1
ABplaaaaaap	WT_Sample1	231		3.645	0.7037		0.5904			1
ABplaaaaaap	WT_Sample1	232		3.4409	0.6882		0.6134			1
ABplaaaaapa	WT_Sample1	186		3.1551						1
ABplaaaaapa	WT_Sample1	187		2.8169						1
ABplaaaaapa	WT_Sample1	188		2.4028						1
ABplaaaaapa	WT_Sample1	189		2.6127						1
ABplaaaaapa	WT_Sample1	190		2.2512						1
ABplaaaaapa	WT_Sample1	191		2.3736						1
ABplaaaaapa	WT_Sample1	192		2.5486						1
ABplaaaaapa	WT_Sample1	193		2.4494						1
ABplaaaaapa	WT_Sample1	194		2.3503						1
ABplaaaaapa	WT_Sample1	195		2.2337						1
ABplaaaaapa	WT_Sample1	196		2.6536						1
ABplaaaaapa	WT_Sample1	197		3.645						1
ABplaaaaapa	WT_Sample1	198		2.5952						1
ABplaaaaapa	WT_Sample1	199		2.7294						1
ABplaaaaapa	WT_Sample1	200		2.327						1
ABplaaaaapa	WT_Sample1	201		2.3211						1
ABplaaaaapa	WT_Sample1	202		2.2978						1
ABplaaaaapa	WT_Sample1	203		2.5136						1
ABplaaaaapa	WT_Sample1	204		2.4844		0.8654				1
ABplaaaaapa	WT_Sample1	206		2.257		0.7094				1
ABplaaaaapa	WT_Sample1	207		4.1932			0.5363			1
ABplaaaaapa	WT_Sample1	208		2.5602						1
ABplaaaaapa	WT_Sample1	209		2.2978						1
ABplaaaaapa	WT_Sample1	210		2.4378						1
ABplaaaaapa	WT_Sample1	211		2.3853						1
ABplaaaaapa	WT_Sample1	212		2.2745						1
ABplaaaaapa	WT_Sample1	213		3.9833						1
ABplaapaaaa	WT_Sample1	226		2.5136			0.7443
ABplaapaaap	WT_Sample1	211		3.68	0.468		0.6279
ABplaapaaap	WT_Sample1	213		2.3211	0.5151		0.7653
ABplaapaaap	WT_Sample1	214		2.5719	0.5498		0.74
ABplaapaaap	WT_Sample1	215		2.4261	0.4649		0.7547
ABplaapaaap	WT_Sample1	217		3.0851	0.5757	1.1645	0.6881
ABplaapaaap	WT_Sample1	221		3.8899	0.466		0.6067
ABplaapapaa	WT_Sample1	211		4.3682			0.6348
ABplaapapaa	WT_Sample1	215		3.855			0.6777
ABplaapappa	WT_Sample1	230		4.4848			0.6063
ABplapaaaaa	WT_Sample1	200		2.2745						1
ABplapaaaaa	WT_Sample1	201		2.1578						1
ABplapaaaaa	WT_Sample1	202		2.2861						1
ABplapaaaaa	WT_Sample1	203		2.222						1
ABplapaaaaa	WT_Sample1	204		2.4903						1
ABplapaaaaa	WT_Sample1	205		2.3561						1
ABplapaaaaa	WT_Sample1	206		2.3795						1
ABplapaaaaa	WT_Sample1	207		2.3036						1
ABplapaaaaa	WT_Sample1	208		2.4203						1
ABplapaaaaa	WT_Sample1	209		2.5019						1
ABplapaaaaa	WT_Sample1	210		2.2978						1
ABplapaaaaa	WT_Sample1	211		2.1637						1
ABplapaaaaa	WT_Sample1	212		2.1578						1
ABplapaaaaa	WT_Sample1	213		2.327						1
ABplapaaaaa	WT_Sample1	214		2.257						1
ABplapaaaaa	WT_Sample1	215		2.2745						1
ABplapaaaaa	WT_Sample1	216		2.2162						1
ABplapaaaaa	WT_Sample1	217		2.1928						1
ABplapaaaaa	WT_Sample1	218		2.1287						1
ABplapaaaaa	WT_Sample1	219		2.2686						1
ABplapaaaaa	WT_Sample1	220		2.1578	0.4876					1
ABplapaaaaa	WT_Sample1	221		2.1054						1
ABplapaaaaa	WT_Sample1	222		2.152						1
ABplapaaaaa	WT_Sample1	223		2.187						1
ABplapaaaaa	WT_Sample1	224		2.1637						1
ABplapaaaaa	WT_Sample1	225		2.1812						1
ABplapaaaaa	WT_Sample1	226		2.5369						1
ABplapaaapp	WT_Sample1	254		2.8868			0.7221
ABplapapppa	WT_Sample1	184		3.9541						1
ABplapapppa	WT_Sample1	190		3.9191						1
ABplapapppa	WT_Sample1	195		3.9716						1
ABplapapppa	WT_Sample1	196		3.6158						1
ABplapapppa	WT_Sample1	197		4.1466						1
ABplapapppa	WT_Sample1	198		4.1524						1
ABplapapppa	WT_Sample1	199		4.1466						1
ABplapapppa	WT_Sample1	206		2.292						1
ABplapapppa	WT_Sample1	207		2.2628						1
ABplapapppa	WT_Sample1	208		2.3328						1
ABplapapppa	WT_Sample1	209		2.3678						1
ABplapapppa	WT_Sample1	210		2.2803						1
ABplapapppa	WT_Sample1	211		2.3561						1
ABplapapppa	WT_Sample1	212		2.327						1
ABplapapppa	WT_Sample1	213		2.3386						1
ABplapapppa	WT_Sample1	214		2.6011						1
ABplapapppa	WT_Sample1	215		2.3153						1
ABplapapppa	WT_Sample1	216		2.2628						1
ABplapapppa	WT_Sample1	217		2.4319						1
ABplapapppa	WT_Sample1	218		2.187						1
ABplapapppa	WT_Sample1	219		2.2861						1
ABplapapppa	WT_Sample1	220		2.3445						1
ABplapapppa	WT_Sample1	221		2.2512						1
ABplapapppa	WT_Sample1	222		2.3386						1
ABplapapppa	WT_Sample1	223		2.1112						1
ABplapppaap	WT_Sample1	209		3.7733						1
ABplapppaap	WT_Sample1	210		2.9976						1
ABplapppaap	WT_Sample1	211		2.5952						1
ABplapppaap	WT_Sample1	212		2.3561						1
ABplapppaap	WT_Sample1	213		2.5253						1
ABplapppaap	WT_Sample1	214		2.3503						1
ABplapppaap	WT_Sample1	215		2.3561						1
ABplapppaap	WT_Sample1	216		2.2978						1
ABplapppaap	WT_Sample1	217		2.3211						1
ABplapppaap	WT_Sample1	218		2.4144						1
ABplapppaap	WT_Sample1	219		2.3853						1
ABplapppaap	WT_Sample1	220		2.3503						1
ABplapppaap	WT_Sample1	221		2.5486						1
ABplapppaap	WT_Sample1	222		2.5894						1
ABplapppaap	WT_Sample1	223		2.2278						1
ABplapppaap	WT_Sample1	224		2.4144						1
ABplapppaap	WT_Sample1	225		2.4786						1
ABplapppaap	WT_Sample1	226		2.2861						1
ABplapppaap	WT_Sample1	227		2.3328						1
ABplapppaap	WT_Sample1	228		2.3211						1
ABplapppaap	WT_Sample1	229		2.4144						1
ABplapppaap	WT_Sample1	230		2.3153						1
ABplapppaap	WT_Sample1	231		2.2861						1
ABplapppaap	WT_Sample1	232		2.4436						1
ABplapppaap	WT_Sample1	233		2.6769	0.4578					1
ABplapppaap	WT_Sample1	234		2.4553						1
ABplapppaap	WT_Sample1	235		2.397						1
ABplapppaap	WT_Sample1	236		2.8169						1
ABplapppaap	WT_Sample1	237		2.7002						1
ABplapppaap	WT_Sample1	238		3.2601						1
ABplapppaap	WT_Sample1	239		2.5019						1
ABplapppaap	WT_Sample1	240		2.3561						1
ABplapppaap	WT_Sample1	241		2.3386						1
ABplapppaap	WT_Sample1	242		3.0968						1
ABplapppaap	WT_Sample1	244		4.1524		0.7015	0.5512			1
ABplapppaap	WT_Sample1	245		2.2745	0.4606					1
ABplapppaap	WT_Sample1	246		3.8958						1
ABplapppaap	WT_Sample1	248		2.3095	0.468					1
ABplapppaap	WT_Sample1	249		3.8316						1
[truncated: 9,307 more rows]

## Sheet: WT_Sample2
Cell identity c	Embryo sample j	Time point T	Segmentation failure (1) or not (empty)	Quality failure (value) or not (empty)						Manually annotated apoptotic cell (1) or not (empty)
				V (μm3)	CPR	VIR	VVR	SR	FRL
Z2	WT_Sample2	148		3.4292			0.976
Z2	WT_Sample2	149		3.5692			0.975
Z2	WT_Sample2	150		2.7352			0.9809
Z2	WT_Sample2	151		3.1493		1.1772	0.978
Z2	WT_Sample2	160		3.5167			0.9754
Z2	WT_Sample2	163		2.6302		1.0165	0.9816
Caaa	WT_Sample2	78		3.0676	0.8036		0.9927
Caaa	WT_Sample2	79		3.3592	0.82		0.992
Earap	WT_Sample2	184		3.126			0.9792
Earpp	WT_Sample2	175		3.3126	0.5351		0.9776
Eplaa	WT_Sample2	184		3.54	0.9647		0.9793
Eplaa	WT_Sample2	185		4.3915	0.9362	3.6957	0.9744
Eplap	WT_Sample2	173		2.7702	0.9504		0.8752
Eplpa	WT_Sample2	134		4.514	0.5436	0.7368	0.9708
Eplpa	WT_Sample2	159		2.6011	0.502		0.9832
Eplpa	WT_Sample2	160		2.6011	0.4937	1.7626	0.9832
Eplpa	WT_Sample2	166		3.0851	0.5026	0.8391	0.98
Eprap	WT_Sample2	176		3.5867	0.9188		0.8674
Eprpa	WT_Sample2	175		2.2162		0.7234	0.9892
Caaaa	WT_Sample2	89		2.0645			0.9889
Caaaa	WT_Sample2	92		4.4906			0.9758
Caaaa	WT_Sample2	93		3.5925			0.9807
Caaaa	WT_Sample2	100		4.2924		0.9784	0.9769
Cpaaa	WT_Sample2	98		4.234			0.9717
Cpaap	WT_Sample2	107		3.785	0.7379		0.9762
Daaa	WT_Sample2	114		4.4848	0.6459		0.914
MSpaapp	WT_Sample2	117		2.0762			0.8873			1
MSpaapp	WT_Sample2	118		2.0879			0.8866			1
MSpaapp	WT_Sample2	119		2.1637			0.8825			1
MSpaapp	WT_Sample2	120		2.7294			0.8518			1
MSpaapp	WT_Sample2	121		2.8693			0.8442			1
MSpaapp	WT_Sample2	122		2.2861			0.8759			1
MSpaapp	WT_Sample2	123		2.4669			0.8661			1
MSpaapp	WT_Sample2	124		2.3095			0.8746			1
MSpaapp	WT_Sample2	125		2.1987		2.2049	0.8806			1
Caaaaa	WT_Sample2	125		3.9016	0.9406	1.2885	0.5383
Caaaaa	WT_Sample2	145		4.3157	0.9529		0.4893
Caaaaa	WT_Sample2	146		3.785	0.9616		0.5521
Caaaaa	WT_Sample2	147		3.82	1.9514		0.548
Caaaaa	WT_Sample2	148		3.645	1.182		0.5687
Caaaaa	WT_Sample2	154		4.0066	0.9071		0.5259
Caaaaa	WT_Sample2	167		4.1874	0.9434		0.5045
Caaaaa	WT_Sample2	172		3.4409	0.9499	0.8516	0.5928
Caaaaa	WT_Sample2	176		3.8841	0.9951		0.5404
Caaaaa	WT_Sample2	179		3.6158	0.965		0.5721
Caaaaa	WT_Sample2	181		2.8693	0.9682		0.6605
Caaaaa	WT_Sample2	182		2.9627	0.9671		0.6494
Caaaaa	WT_Sample2	183		4.4265	0.9567	4.5121
Caaaaa	WT_Sample2	185		4.199	0.958		0.5031
Caaaaa	WT_Sample2	186		3.8724	0.9609		0.5418
Caaaaa	WT_Sample2	187		4.3857	0.9512
Caaaaa	WT_Sample2	192		3.9658	0.9587		0.5307
Caaaaa	WT_Sample2	193		4.0766	0.9521		0.5176
Caaaap	WT_Sample2	127		3.4992	0.7306		0.6574
Caaaap	WT_Sample2	130		4.1466	0.856		0.5941
Caaaap	WT_Sample2	145		4.4323	0.9529		0.5661
Caaaap	WT_Sample2	146		3.3476	0.9616	52.9626	0.6723
Caaaap	WT_Sample2	151		4.2632	0.9319		0.5826
Caaaap	WT_Sample2	152		3.5167	0.9172		0.6557
Caaaap	WT_Sample2	153		3.2892	0.9495	0.974	0.678
Caaaap	WT_Sample2	173		4.3098	0.9195	33.779	0.5781
Caaaap	WT_Sample2	178		3.6917	0.9437		0.6386
Caaaap	WT_Sample2	179		2.8927	0.965		0.7168
Caaaap	WT_Sample2	180		3.5225	0.9543		0.6552
Caaaap	WT_Sample2	181		3.0326	0.9682		0.7031
Caaaap	WT_Sample2	182		3.1551	0.9671		0.6911
Caaaap	WT_Sample2	183		3.61	0.9567		0.6466
Caaaap	WT_Sample2	184		2.6419	0.7566		0.7414
Caaaap	WT_Sample2	185		3.6042	0.958		0.6472
Caaaap	WT_Sample2	186		3.3942	0.9609		0.6677
Caaaap	WT_Sample2	189		4.0941	0.9533		0.5992
Caaaap	WT_Sample2	191		3.3184	1.465		0.6751
Caaaap	WT_Sample2	192		3.6975	0.9587		0.638
Caaaap	WT_Sample2	194		3.3417	0.9347		0.6729
Caaaap	WT_Sample2	195		3.5867	0.9369		0.6489
Caaapa	WT_Sample2	126		3.505	0.4831	1.8954	0.5308
Caaapa	WT_Sample2	129		3.4759	0.4568	5.1507	0.5347
Caaapa	WT_Sample2	165		4.4032	0.5573
Caaapa	WT_Sample2	166		3.6858	0.9569		0.5066
Caaapa	WT_Sample2	168		3.1376	0.9664		0.58
Caaapa	WT_Sample2	169		2.9218	0.9635		0.6089
Caaapa	WT_Sample2	171		2.9918	0.8119		0.5995
Caaapa	WT_Sample2	175		2.6419	0.8056		0.6464
Caaapa	WT_Sample2	176		2.5311	0.8254		0.6612
Caaapa	WT_Sample2	177		2.4844	0.8203		0.6674
Caaapa	WT_Sample2	178		2.986	0.7954		0.6003
Caaapa	WT_Sample2	179		3.2892	0.8322		0.5597
Caaapa	WT_Sample2	181		3.1843	0.8393		0.5738
Caaapa	WT_Sample2	182		4.3915	0.8462
Caaapa	WT_Sample2	183		3.645	0.862		0.5121
Caaapa	WT_Sample2	184		4.0008	0.9141
Caaapa	WT_Sample2	186		3.8433	0.9565		0.4856
Caaapa	WT_Sample2	187		2.741	0.9674		0.6331
Caaapa	WT_Sample2	188		4.2457	0.9513
Caaapa	WT_Sample2	189		4.4148	0.9624
Caaapa	WT_Sample2	190		4.3332	0.9608
Caaapp	WT_Sample2	168		4.3098	0.9664		0.9612
Caaapp	WT_Sample2	187		4.4848	0.9674		0.9596
Caaapp	WT_Sample2	189		3.9191	0.9624		0.9647
Caaapp	WT_Sample2	190		4.3507	0.9608		0.9608
Caapap	WT_Sample2	163		2.9568		1.411	0.5691			1
Caapap	WT_Sample2	170		2.9743			0.5665			1
Caapap	WT_Sample2	171		3.4875			0.4917			1
Caapap	WT_Sample2	173		2.8169			0.5895			1
Caapap	WT_Sample2	174		3.47			0.4943			1
Caapap	WT_Sample2	175		2.8985			0.5776			1
Caapap	WT_Sample2	176		2.811			0.5903			1
Caapap	WT_Sample2	177		2.6944			0.6073			1
Caapap	WT_Sample2	178		2.4144			0.6481			1
Caapap	WT_Sample2	179		2.3795	0.5141		0.6532			1
Caapap	WT_Sample2	180		2.362			0.6558			1
Caapap	WT_Sample2	181		2.257			0.6711			1
Caapap	WT_Sample2	182		2.2861			0.6668			1
Caapap	WT_Sample2	183		2.4144			0.6481			1
Caappd	WT_Sample2	171		3.2193	0.79		0.9504
Caappv	WT_Sample2	135		2.9627			0.757
Caappv	WT_Sample2	136		2.8518			0.7661
Caappv	WT_Sample2	137		3.3184			0.7278
Caappv	WT_Sample2	141		3.3009			0.7293
Capaap	WT_Sample2	154		4.3857		0.7143	0.9263
Cpaaaa	WT_Sample2	154		2.8927	0.8502		0.919
Cpaaaa	WT_Sample2	157		3.435	0.9445		0.9038
Cpaaaa	WT_Sample2	158		2.4144	0.9533	1.4044	0.9324
Cpaaaa	WT_Sample2	176		2.5894	0.9631		0.9275
Cpaaaa	WT_Sample2	193		2.2453	0.9498		0.9371
Cpaaaa	WT_Sample2	194		2.2861	0.9599		0.9359
Cpaaap	WT_Sample2	118		4.0416		3.7068
Cpaaap	WT_Sample2	133		3.6683
Cpaaap	WT_Sample2	134		3.4992
Cpaaap	WT_Sample2	135		4.0941
Cpaaap	WT_Sample2	136		3.126			0.518
Cpaaap	WT_Sample2	138		2.9918			0.5387
Cpaaap	WT_Sample2	139		3.5284	0.6656	0.7914
Cpaaap	WT_Sample2	141		3.2368	0.7313	29.8282	0.5009
Cpaaap	WT_Sample2	143		3.2601	0.7668		0.4973
Cpaaap	WT_Sample2	170		3.9133	0.6942
Cpaaap	WT_Sample2	171		2.1287	0.929		0.6718
Cpaaap	WT_Sample2	172		3.3826	0.9009
Cpaaap	WT_Sample2	173		2.8227	0.9499		0.5647
Cpaaap	WT_Sample2	174		4.1582	0.6935
Cpaaap	WT_Sample2	175		4.0649	0.8656
Cpaaap	WT_Sample2	176		2.9277	0.9631		0.5486
Cpaaap	WT_Sample2	177		2.6769	0.8631		0.5872
Cpaaap	WT_Sample2	178		2.8169	0.726		0.5656
Cpaaap	WT_Sample2	179		2.3853	0.8716		0.6322
Cpaaap	WT_Sample2	180		2.5136	0.8874		0.6124
Cpaaap	WT_Sample2	181		3.2076	0.9292		0.5054
Cpaaap	WT_Sample2	182		2.9452	0.9226		0.5459
Cpaaap	WT_Sample2	183		3.1493	0.664		0.5144
Cpaaap	WT_Sample2	184		4.444	0.8815
Cpaaap	WT_Sample2	185		4.3157	0.757
Cpaaap	WT_Sample2	186		2.776	0.9316		0.5719
Cpaaap	WT_Sample2	187		3.6917	0.9378
Cpaaap	WT_Sample2	188		3.5342	0.8258
Cpaaap	WT_Sample2	191		3.7616	0.9133
Cpaaap	WT_Sample2	192		3.056	0.7636		0.5288
Cpaaap	WT_Sample2	194		3.7033	0.9599
Cpaaap	WT_Sample2	195		3.9949	0.928
Cpaapa	WT_Sample2	134		3.6742		8.165	0.542
Cpaapa	WT_Sample2	137		3.6333			0.5471
Cpaapa	WT_Sample2	138		2.5078			0.6874
Cpaapa	WT_Sample2	147		2.9277		4.1367	0.635
Cpaapa	WT_Sample2	159		2.811	0.6374		0.6496
Cpaapa	WT_Sample2	160		3.1551		1.7005	0.6067
Cpaapa	WT_Sample2	162		2.8227	0.515		0.6481
Cpaapa	WT_Sample2	163		3.3242	0.5371		0.5856
Cpaapa	WT_Sample2	164		3.8375			0.5216
Cpaapa	WT_Sample2	165		3.7966	0.7388		0.5267
Cpaapa	WT_Sample2	166		2.9976	0.9489	4.2981	0.6263
Cpaapa	WT_Sample2	168		2.7877	0.927		0.6525
Cpaapa	WT_Sample2	173		4.1699	0.9048
Cpaapa	WT_Sample2	174		3.9191	0.7338		0.5115
Cpaapa	WT_Sample2	175		3.1668	0.6966		0.6052
Cpaapa	WT_Sample2	176		3.0443	0.9006		0.6205
Cpaapa	WT_Sample2	177		4.3332	0.9174
Cpaapa	WT_Sample2	180		3.3767	0.9486		0.5791
Cpaapa	WT_Sample2	181		3.4934	0.9325		0.5645
Cpaapa	WT_Sample2	182		3.3359	0.9367		0.5842
Cpaapa	WT_Sample2	183		4.2924	0.9393
Cpaapa	WT_Sample2	184		2.9918	0.953		0.627
Cpaapa	WT_Sample2	185		2.6361	0.9483		0.6714
Cpaapa	WT_Sample2	186		3.4467	0.9406		0.5703
Cpaapa	WT_Sample2	190		2.9335	0.9457	0.9669	0.6343
Cpaapp	WT_Sample2	170		3.091	0.945		0.9603
Cpaapp	WT_Sample2	184		4.479	0.953		0.9425
Daapa	WT_Sample2	175		3.2134			0.9346
Daapa	WT_Sample2	176		4.1582			0.9154
Daapa	WT_Sample2	184		3.056		1.6766	0.9378
Dappp	WT_Sample2	184		4.4848	0.6733		0.4851
Dappp	WT_Sample2	188		2.5369	0.7691		0.7087
ABalaapapa	WT_Sample2	120		3.715		3.1726	0.5594			1
ABalaapapa	WT_Sample2	134		3.715			0.5594			1
ABalaapapa	WT_Sample2	135		2.8577						1
ABalaapapa	WT_Sample2	136		2.4844						1
ABalaapapa	WT_Sample2	137		2.3386						1
ABalaapapa	WT_Sample2	138		2.3445						1
ABalaapapa	WT_Sample2	139		2.2045						1
ABalaapapa	WT_Sample2	140		2.1112						1
ABalaapapa	WT_Sample2	141		2.082						1
ABalaapapa	WT_Sample2	142		2.0762						1
ABalaapapa	WT_Sample2	143		2.0879						1
ABalaapapa	WT_Sample2	144		2.1753						1
ABalaapapa	WT_Sample2	145		2.1228						1
ABalaapapa	WT_Sample2	146		2.9568						1
ABalaapapa	WT_Sample2	147		2.152						1
ABalaapapa	WT_Sample2	148		2.1112	0.4729					1
ABalaapapa	WT_Sample2	149		2.0645						1
ABalaapapa	WT_Sample2	150		2.1287						1
ABalaapapa	WT_Sample2	151		2.2512						1
ABalaapapa	WT_Sample2	152		2.1987						1
ABalaapapa	WT_Sample2	153		2.152						1
ABalaapapa	WT_Sample2	154		2.292						1
ABalaapapa	WT_Sample2	155		2.362						1
ABalaapapa	WT_Sample2	156		2.4028						1
ABalaapapa	WT_Sample2	157		2.4669						1
ABalaapapa	WT_Sample2	158		2.3561						1
ABalaapapa	WT_Sample2	159		2.5602						1
ABalaapapa	WT_Sample2	160		2.1928						1
ABalaapapa	WT_Sample2	161		2.1462						1
ABalaapapa	WT_Sample2	162		2.0995						1
ABalaapapa	WT_Sample2	163		2.6069						1
ABalaappaa	WT_Sample2	135		3.2776						1
ABalaappaa	WT_Sample2	136		2.9802						1
ABalaappaa	WT_Sample2	137		2.7527						1
ABalaappaa	WT_Sample2	138		2.8052						1
ABalaappaa	WT_Sample2	139		2.7819						1
ABalaappaa	WT_Sample2	140		2.5311						1
ABalaappaa	WT_Sample2	141		2.6127						1
ABalaappaa	WT_Sample2	143		2.1812						1
ABalaappaa	WT_Sample2	144		2.5311						1
ABalaappaa	WT_Sample2	145		3.1726						1
ABalaappaa	WT_Sample2	146		2.8344						1
ABalaappaa	WT_Sample2	147		2.9743						1
ABalaappaa	WT_Sample2	148		3.6333						1
ABalaappaa	WT_Sample2	149		2.741						1
ABalaappaa	WT_Sample2	150		3.3592						1
ABalaappaa	WT_Sample2	151		3.6392						1
ABalaappaa	WT_Sample2	152		3.056						1
ABalaappaa	WT_Sample2	153		3.3534						1
ABalaappaa	WT_Sample2	154		2.6652						1
ABalaappaa	WT_Sample2	155		2.2745						1
ABalaappaa	WT_Sample2	156		2.4203						1
ABalaappaa	WT_Sample2	157		2.3736						1
ABalaappaa	WT_Sample2	158		2.2978		1.3548				1
ABalaappaa	WT_Sample2	160		2.2453						1
ABalaappaa	WT_Sample2	161		2.3736						1
ABalaappaa	WT_Sample2	162		2.1054		0.7169				1
ABalaappaa	WT_Sample2	163		4.3798						1
ABalaappaa	WT_Sample2	164		2.5719						1
ABalaappaa	WT_Sample2	165		2.187						1
ABalaappaa	WT_Sample2	166		2.1812						1
ABalapapaa	WT_Sample2	138		4.2282						1
ABalapapaa	WT_Sample2	140		4.4265						1
ABalapapaa	WT_Sample2	141		3.505						1
ABalapapaa	WT_Sample2	142		2.7177						1
ABalapapaa	WT_Sample2	143		2.7702						1
ABalapapaa	WT_Sample2	144		3.8958						1
ABalapapaa	WT_Sample2	145		3.8608						1
ABalapapaa	WT_Sample2	146		3.7616						1
ABalapapaa	WT_Sample2	147		4.4615						1
ABalapapaa	WT_Sample2	148		3.6217						1
ABalapapaa	WT_Sample2	149		3.8491						1
ABalapapaa	WT_Sample2	151		4.199						1
ABalapapaa	WT_Sample2	152		3.4759						1
ABalapapaa	WT_Sample2	153		2.4611						1
ABalapapaa	WT_Sample2	154		3.6158						1
ABalapapaa	WT_Sample2	155		3.126						1
ABalapapaa	WT_Sample2	156		3.6917						1
ABalapapaa	WT_Sample2	161		3.1959						1
ABalapapaa	WT_Sample2	162		2.6127						1
ABalapapaa	WT_Sample2	163		2.6419						1
ABalapapaa	WT_Sample2	164		3.8841						1
ABalapapaa	WT_Sample2	165		2.2686						1
ABalapapaa	WT_Sample2	166		3.47						1
ABalapapaa	WT_Sample2	167		2.6011						1
ABalapapaa	WT_Sample2	168		2.4961						1
ABalapapaa	WT_Sample2	169		2.4728						1
ABalapapaa	WT_Sample2	170		2.4028						1
ABalapapaa	WT_Sample2	171		3.1026						1
ABalapapaa	WT_Sample2	172		2.5194						1
ABalapapaa	WT_Sample2	173		2.1812						1
ABalapapaa	WT_Sample2	174		2.6302						1
ABalapapaa	WT_Sample2	175		2.4961						1
ABalapapaa	WT_Sample2	176		2.6594						1
ABalappaaa	WT_Sample2	138		4.234						1
ABalappaaa	WT_Sample2	139		3.2892						1
ABalappaaa	WT_Sample2	140		2.9743						1
ABalappaaa	WT_Sample2	141		3.126						1
ABalappaaa	WT_Sample2	142		2.4028						1
ABalappaaa	WT_Sample2	143		2.3561						1
ABalappaaa	WT_Sample2	144		2.3736						1
ABalappaaa	WT_Sample2	145		2.3503						1
ABalappaaa	WT_Sample2	146		2.4378						1
ABalappaaa	WT_Sample2	147		2.5369						1
ABalappaaa	WT_Sample2	148		2.5369						1
ABalappaaa	WT_Sample2	149		3.3184						1
ABalappaaa	WT_Sample2	150		2.5253						1
ABalappaaa	WT_Sample2	151		2.7644						1
ABalappaaa	WT_Sample2	152		3.3592						1
ABalappaaa	WT_Sample2	153		2.2978						1
ABalappaaa	WT_Sample2	154		2.3736						1
ABalappaaa	WT_Sample2	155		2.1928						1
ABalappaaa	WT_Sample2	156		2.292						1
ABalappaaa	WT_Sample2	157		2.2395						1
ABalappaaa	WT_Sample2	158		2.1287		0.6734				1
ABalappaaa	WT_Sample2	159		4.2807						1
ABalappaaa	WT_Sample2	160		3.2018						1
ABalappaaa	WT_Sample2	161		2.2337						1
ABalappaaa	WT_Sample2	162		2.3328						1
ABalappaaa	WT_Sample2	163		2.3503						1
ABalappaaa	WT_Sample2	164		2.4144						1
ABalappaaa	WT_Sample2	165		3.4117						1
ABalappaaa	WT_Sample2	166		2.3736						1
ABalappaaa	WT_Sample2	167		3.1959						1
ABalappaaa	WT_Sample2	168		3.2776						1
ABalappaaa	WT_Sample2	169		2.4261						1
ABalappaaa	WT_Sample2	170		3.9133						1
ABalpapaap	WT_Sample2	129		4.3682		1.3787	0.7634
ABalpapaap	WT_Sample2	146		3.5342			0.8086
ABalpapppa	WT_Sample2	156		3.2368		1.1757	0.8697
ABalppaaaa	WT_Sample2	133		4.3857		0.7037	0.6383			1
ABalppaaaa	WT_Sample2	134		2.5019						1
ABalppaaaa	WT_Sample2	135		2.4611						1
ABalppaaaa	WT_Sample2	136		2.3911						1
ABalppaaaa	WT_Sample2	137		2.187						1
ABalppaaaa	WT_Sample2	138		2.2512						1
ABalppaaaa	WT_Sample2	139		2.2745						1
ABalppaaaa	WT_Sample2	140		2.4028						1
ABalppaaaa	WT_Sample2	141		2.2628						1
ABalppaaaa	WT_Sample2	142		2.397						1
ABalppaaaa	WT_Sample2	143		2.8169						1
ABalppaaaa	WT_Sample2	144		2.986						1
ABalppaaaa	WT_Sample2	145		3.2193						1
ABalppaaaa	WT_Sample2	146		2.6769						1
ABalppaaaa	WT_Sample2	147		3.2309						1
ABalppaaaa	WT_Sample2	148		2.4786						1
ABalppaaaa	WT_Sample2	149		2.4728						1
ABalppaaaa	WT_Sample2	150		2.5544						1
ABalppaaaa	WT_Sample2	151		3.3126						1
ABalppaaaa	WT_Sample2	152		2.2978		8.183				1
ABalppaaaa	WT_Sample2	154		2.4961						1
ABalppaaaa	WT_Sample2	155		2.6886						1
ABalppaaaa	WT_Sample2	156		2.257						1
ABalppaaaa	WT_Sample2	157		2.5952						1
ABalppaaaa	WT_Sample2	158		2.2162		0.78				1
ABalppaaaa	WT_Sample2	159		4.304			0.6078			1
ABalppaaaa	WT_Sample2	160		2.7352						1
ABalppaaaa	WT_Sample2	161		2.3561						1
ABalppaaaa	WT_Sample2	162		2.7352						1
ABalppaaaa	WT_Sample2	163		2.222						1
ABalppaaaa	WT_Sample2	164		2.3095						1
ABalppaaaa	WT_Sample2	165		2.0937						1
ABalppaaaa	WT_Sample2	166		2.3095						1
ABalppaaaa	WT_Sample2	167		2.3795						1
ABalppaapa	WT_Sample2	132		4.409			0.6188			1
ABalppaapa	WT_Sample2	133		3.0385						1
ABalppaapa	WT_Sample2	134		2.4144						1
ABalppaapa	WT_Sample2	135		2.2628						1
ABalppaapa	WT_Sample2	136		2.4203						1
ABalppaapa	WT_Sample2	137		2.4669						1
ABalppaapa	WT_Sample2	138		2.2745						1
ABalppaapa	WT_Sample2	139		2.3328						1
ABalppaapa	WT_Sample2	140		2.9918						1
ABalppaapa	WT_Sample2	141		2.2803						1
ABalppaapa	WT_Sample2	142		2.1287						1
ABalppaapa	WT_Sample2	143		2.9918						1
ABalppaapa	WT_Sample2	144		2.7585						1
ABalppaapa	WT_Sample2	145		2.5136						1
ABalppaapa	WT_Sample2	146		2.7235						1
ABalppaapa	WT_Sample2	147		2.1987						1
ABalppaapa	WT_Sample2	148		2.1462						1
ABalppaapa	WT_Sample2	149		2.1462						1
ABalppaapa	WT_Sample2	150		2.4378						1
ABalppaapa	WT_Sample2	151		2.257						1
ABalppaapa	WT_Sample2	152		2.3095						1
ABalppaapa	WT_Sample2	153		2.3561		0.8458				1
ABalppaapa	WT_Sample2	155		2.3678						1
ABalppaapa	WT_Sample2	156		2.152						1
ABaraaaapp	WT_Sample2	139		4.3157						1
ABaraaaapp	WT_Sample2	140		3.5459						1
ABaraaaapp	WT_Sample2	141		2.8227						1
ABaraaaapp	WT_Sample2	142		2.6711						1
ABaraaaapp	WT_Sample2	143		3.1318						1
ABaraaaapp	WT_Sample2	144		2.7644						1
ABaraaaapp	WT_Sample2	145		4.4207						1
ABaraaaapp	WT_Sample2	146		2.5602						1
ABaraaaapp	WT_Sample2	147		2.3911						1
ABaraaaapp	WT_Sample2	148		2.7177						1
ABaraaaapp	WT_Sample2	149		3.1551						1
ABaraaaapp	WT_Sample2	150		3.9016						1
ABaraaaapp	WT_Sample2	151		3.5225						1
ABaraaaapp	WT_Sample2	152		3.61						1
ABaraaaapp	WT_Sample2	153		3.9891						1
ABaraaaapp	WT_Sample2	154		2.6769						1
ABaraaaapp	WT_Sample2	155		2.5136						1
ABaraaaapp	WT_Sample2	156		2.916						1
ABaraaaapp	WT_Sample2	157		2.4844						1
ABaraaaapp	WT_Sample2	158		2.4728						1
ABaraaaapp	WT_Sample2	159		2.6419						1
ABaraaaapp	WT_Sample2	160		2.327						1
ABaraaaapp	WT_Sample2	161		2.2686						1
ABaraaaapp	WT_Sample2	162		2.327						1
ABaraaaapp	WT_Sample2	163		2.3036	0.503					1
ABaraaaapp	WT_Sample2	164		2.397	0.524					1
ABaraaaapp	WT_Sample2	165		2.3503						1
ABaraaaapp	WT_Sample2	166		3.1551						1
ABarapapaa	WT_Sample2	118		2.4436	0.615	0.7451	0.9182
ABarappaap	WT_Sample2	152		4.0999	0.4652		0.729
ABarpaaaaa	WT_Sample2	137		4.0707		0.9428	0.8521
ABarpaaaaa	WT_Sample2	141		2.7294		0.9348	0.9009
ABarpaaapp	WT_Sample2	137		3.7791						1
ABarpaaapp	WT_Sample2	138		4.0299						1
ABarpaaapp	WT_Sample2	139		3.3709						1
ABarpaaapp	WT_Sample2	140		2.5719						1
ABarpaaapp	WT_Sample2	141		3.435						1
ABarpaaapp	WT_Sample2	142		3.3359						1
ABarpaaapp	WT_Sample2	143		2.5602						1
ABarpaaapp	WT_Sample2	144		2.5777		1.4602				1
ABarpaaapp	WT_Sample2	146		3.7441						1
ABarpaaapp	WT_Sample2	147		3.47						1
ABarpaaapp	WT_Sample2	148		3.7383						1
ABarpaaapp	WT_Sample2	150		2.5836						1
ABarpaaapp	WT_Sample2	151		2.9277						1
ABarpaaapp	WT_Sample2	152		3.0968						1
ABarpaaapp	WT_Sample2	153		2.6477						1
ABarpaaapp	WT_Sample2	154		2.2103						1
ABarpaaapp	WT_Sample2	155		2.3386						1
ABarpaaapp	WT_Sample2	156		2.4611						1
ABarpaaapp	WT_Sample2	157		2.5486						1
ABarpaaapp	WT_Sample2	158		2.6827						1
ABarpaaapp	WT_Sample2	159		2.811						1
ABarpaaapp	WT_Sample2	160		3.0501						1
ABarpaaapp	WT_Sample2	161		2.2278						1
ABarpaaapp	WT_Sample2	162		2.2337						1
ABarpaaapp	WT_Sample2	163		2.1928						1
ABarpaaapp	WT_Sample2	164		2.082						1
ABarpaaapp	WT_Sample2	165		2.2395						1
ABarpaaapp	WT_Sample2	166		2.1462						1
ABarpaaapp	WT_Sample2	167		2.2512						1
ABarpaaapp	WT_Sample2	168		2.2395						1
ABarpaaapp	WT_Sample2	169		2.2162						1
ABarpaapaa	WT_Sample2	154		4.2982			0.8482
ABarpaappa	WT_Sample2	175		2.6594	0.6845	1.8388	0.9617
ABarpappap	WT_Sample2	142		2.2162	0.793	1.0352	0.9428
ABarpappap	WT_Sample2	161		3.0326	0.7797		0.9218
ABarpappap	WT_Sample2	162		2.6069	0.7795		0.9328
ABarpapppa	WT_Sample2	172		4.3448	0.8314		0.8984
ABarpapppp	WT_Sample2	161		2.1287		0.8789	0.9657
ABarpapppp	WT_Sample2	163		2.2337	0.6057	1.0287	0.964
ABarpapppp	WT_Sample2	166		2.0937	0.6354	0.966	0.9663
ABarpapppp	WT_Sample2	169		3.7966	0.6038		0.9389
ABarpapppp	WT_Sample2	170		3.5983	0.8738		0.9421
ABarpapppp	WT_Sample2	189		4.1232	0.7365		0.9336
ABarpapppp	WT_Sample2	190		2.6186	0.799		0.9578
ABarpapppp	WT_Sample2	191		2.7177	0.7802		0.9562
ABarpapppp	WT_Sample2	193		2.6594	0.8014		0.9572
ABarpapppp	WT_Sample2	194		3.3417	0.8098		0.9462
ABarpapppp	WT_Sample2	195		4.269	0.8002		0.9313
ABarppaapa	WT_Sample2	193		3.1143	0.6995		0.9493
ABarpppapa	WT_Sample2	160		2.7585	0.7637	0.8339	0.9496
ABarppppap	WT_Sample2	166		3.5109	0.5819	0.7772	0.9326
ABplaaaapa	WT_Sample2	193		3.6683	0.6838		0.9129
ABplaaaapp	WT_Sample2	175		2.1578		0.8261	0.9468
ABplaaapaa	WT_Sample2	182		2.3795	0.7392	0.8563	0.7762
ABplaaapaa	WT_Sample2	191		2.5253	0.8524		0.7625
ABplaaapaa	WT_Sample2	193		3.2018	0.871		0.6988
ABplaaapaa	WT_Sample2	194		3.8083	0.8534		0.6418
ABplaaapap	WT_Sample2	189		3.2076	0.7955		0.92
ABplaaapap	WT_Sample2	192		3.2718	0.851		0.9184
ABplaaappp	WT_Sample2	186		3.3651	0.6762		0.9437
ABplaaappp	WT_Sample2	188		2.9393	0.6945		0.9508
ABplapaapa	WT_Sample2	116		2.7644		1.3774	0.8555
ABplpappap	WT_Sample2	134		2.4961						1
ABplpappap	WT_Sample2	135		3.1901						1
ABplpappap	WT_Sample2	136		3.9599						1
ABplpappap	WT_Sample2	137		2.8344						1
ABplpappap	WT_Sample2	138		3.2601						1
ABplpappap	WT_Sample2	139		2.5428						1
ABplpappap	WT_Sample2	140		2.2861						1
ABplpappap	WT_Sample2	141		2.1928						1
ABplpappap	WT_Sample2	142		2.2337						1
ABplpappap	WT_Sample2	143		2.1345						1
ABplpappap	WT_Sample2	144		2.4261						1
ABplpappap	WT_Sample2	145		2.2278						1
ABplpappap	WT_Sample2	146		2.1403						1
ABplpappap	WT_Sample2	147		2.2045						1
ABplpappap	WT_Sample2	148		2.5253						1
ABplpappap	WT_Sample2	149		2.2278						1
ABplpappap	WT_Sample2	150		2.152						1
ABplpappap	WT_Sample2	151		2.2395						1
ABplpappap	WT_Sample2	152		2.1812						1
ABplpappap	WT_Sample2	153		2.2628						1
ABplpappap	WT_Sample2	154		2.2628						1
ABplpappap	WT_Sample2	155		2.2686						1
ABplpappap	WT_Sample2	156		2.4144						1
ABplpappap	WT_Sample2	157		2.2395						1
ABplpappap	WT_Sample2	158		2.2045						1
ABplpappap	WT_Sample2	159		2.362		2.0329				1
ABplpappap	WT_Sample2	162		2.7644						1
ABplpappap	WT_Sample2	163		3.9424						1
ABplppaaap	WT_Sample2	137		3.3884						1
ABplppaaap	WT_Sample2	138		2.6769						1
ABplppaaap	WT_Sample2	139		2.6536						1
ABplppaaap	WT_Sample2	140		2.6652						1
ABplppaaap	WT_Sample2	141		2.6011						1
ABplppaaap	WT_Sample2	142		2.5019						1
ABplppaaap	WT_Sample2	143		2.5136						1
ABplppaaap	WT_Sample2	144		3.2309						1
ABplppaaap	WT_Sample2	145		3.1143						1
ABplppaaap	WT_Sample2	146		2.7002						1
ABplppaaap	WT_Sample2	147		2.706						1
ABplppaaap	WT_Sample2	148		2.5661						1
ABplppaaap	WT_Sample2	149		2.4611						1
ABplppaaap	WT_Sample2	150		2.6186						1
ABplppaaap	WT_Sample2	151		2.4378						1
ABplppaaap	WT_Sample2	152		2.4844						1
ABplppaaap	WT_Sample2	153		2.5194						1
ABplppaaap	WT_Sample2	154		2.4436						1
ABplppaaap	WT_Sample2	155		2.5078						1
ABplppaaap	WT_Sample2	156		2.5019						1
ABplppaaap	WT_Sample2	157		2.2978						1
ABplppaaap	WT_Sample2	158		2.5544						1
ABplppaaap	WT_Sample2	159		2.2337		1.2901				1
ABplppaaap	WT_Sample2	163		2.3853						1
ABplppaaap	WT_Sample2	164		2.3036						1
ABplppaaap	WT_Sample2	165		2.2978						1
ABplppaaap	WT_Sample2	166		2.1054						1
ABplppaaap	WT_Sample2	167		2.1345						1
ABplppaaap	WT_Sample2	168		2.1812						1
ABplppaaap	WT_Sample2	169		2.1695						1
ABplppaaap	WT_Sample2	170		2.2512						1
ABplpppapp	WT_Sample2	134		3.4467						1
ABplpppapp	WT_Sample2	135		2.776						1
ABplpppapp	WT_Sample2	136		2.117						1
ABplpppapp	WT_Sample2	137		2.257						1
ABplpppapp	WT_Sample2	138		2.2278						1
ABplpppapp	WT_Sample2	139		2.4669						1
ABplpppapp	WT_Sample2	140		2.4611						1
ABplpppapp	WT_Sample2	141		2.6186						1
ABplpppapp	WT_Sample2	142		2.8052						1
ABplpppapp	WT_Sample2	143		2.4961						1
ABplpppapp	WT_Sample2	144		2.776						1
ABplpppapp	WT_Sample2	145		2.6769						1
ABplpppapp	WT_Sample2	146		2.776						1
ABplpppapp	WT_Sample2	147		2.4728						1
ABplpppapp	WT_Sample2	148		2.3211						1
ABplpppapp	WT_Sample2	149		2.3386						1
ABplpppapp	WT_Sample2	150		2.397						1
ABplpppapp	WT_Sample2	151		2.3561						1
ABplpppapp	WT_Sample2	152		2.4261						1
ABplpppapp	WT_Sample2	153		2.4378						1
ABplpppapp	WT_Sample2	154		2.4028						1
ABplpppapp	WT_Sample2	155		2.4611						1
ABplpppapp	WT_Sample2	156		2.4203						1
ABplpppapp	WT_Sample2	157		2.3736						1
ABplpppapp	WT_Sample2	158		2.4728						1
ABplpppapp	WT_Sample2	159		2.4261						1
ABplpppapp	WT_Sample2	160		2.327						1
ABplpppapp	WT_Sample2	161		2.3561						1
ABplpppapp	WT_Sample2	162		2.811						1
ABplpppapp	WT_Sample2	163		2.3386						1
ABplpppapp	WT_Sample2	164		2.2453						1
ABpraappaa	WT_Sample2	185		3.855			0.7383
ABpraappaa	WT_Sample2	186		4.4731	0.457		0.6964
ABpraappaa	WT_Sample2	187		3.8841	0.4856		0.7363
ABpraappaa	WT_Sample2	188		4.0066	0.5135		0.728
ABpraappaa	WT_Sample2	189		3.7791	0.8685		0.7435
ABpraappaa	WT_Sample2	190		3.091	0.8617		0.7902
ABpraappaa	WT_Sample2	191		2.8868	0.871		0.804
ABpraappaa	WT_Sample2	192		3.68	0.8885		0.7502
ABpraappap	WT_Sample2	194		2.3328	0.9131		0.9615
ABpraappap	WT_Sample2	195		2.5428	0.9096		0.958
ABpraapppa	WT_Sample2	188		4.199	0.6554		0.941
ABpraapppa	WT_Sample2	189		4.3215	0.6745		0.9393
ABpraapppa	WT_Sample2	190		2.4961	0.6981		0.9649
ABpraapppa	WT_Sample2	193		2.5253	0.7528		0.9645
ABpraapppa	WT_Sample2	194		2.6827	0.7365		0.9623
ABprappppa	WT_Sample2	192		4.1407	0.6933		0.7888
ABprppaaap	WT_Sample2	129		4.5023						1
ABprppaaap	WT_Sample2	136		3.1609						1
ABprppaaap	WT_Sample2	137		3.0793						1
ABprppaaap	WT_Sample2	138		2.4203						1
ABprppaaap	WT_Sample2	139		2.5311						1
ABprppaaap	WT_Sample2	140		2.3736						1
ABprppaaap	WT_Sample2	141		2.3736						1
ABprppaaap	WT_Sample2	142		2.5486						1
ABprppaaap	WT_Sample2	143		2.327						1
ABprppaaap	WT_Sample2	144		2.2337						1
ABprppaaap	WT_Sample2	145		2.3211						1
ABprppaaap	WT_Sample2	146		2.7527						1
ABprppaaap	WT_Sample2	147		3.9599						1
ABprppaaap	WT_Sample2	148		2.7352						1
ABprppaaap	WT_Sample2	149		2.397						1
ABprppaaap	WT_Sample2	150		2.3736						1
ABprppaaap	WT_Sample2	151		2.4961						1
ABprpppapp	WT_Sample2	130		3.8433						1
ABprpppapp	WT_Sample2	131		3.8491						1
ABprpppapp	WT_Sample2	132		3.7908						1
ABprpppapp	WT_Sample2	133		3.8724						1
ABprpppapp	WT_Sample2	134		2.6419						1
ABprpppapp	WT_Sample2	135		2.3445						1
ABprpppapp	WT_Sample2	136		2.6011		1.0266				1
ABprpppapp	WT_Sample2	138		3.2892						1
ABprpppapp	WT_Sample2	139		2.3445						1
ABprpppapp	WT_Sample2	140		2.9685						1
ABprpppapp	WT_Sample2	141		2.3503						1
ABprpppapp	WT_Sample2	142		2.2278						1
ABprpppapp	WT_Sample2	143		2.6652						1
ABprpppapp	WT_Sample2	144		2.5078		10.3369				1
ABprpppapp	WT_Sample2	146		2.2337						1
ABprpppapp	WT_Sample2	147		2.3036						1
ABprpppapp	WT_Sample2	148		2.3503						1
ABprpppapp	WT_Sample2	149		2.2686						1
ABprpppapp	WT_Sample2	150		2.3095						1
ABprpppapp	WT_Sample2	151		2.5078		3.5195				1
ABprpppapp	WT_Sample2	153		2.4436		0.7004				1
ABprpppapp	WT_Sample2	155		2.3328						1
ABprpppapp	WT_Sample2	156		2.4086						1
ABprpppapp	WT_Sample2	157		2.3736						1
ABprpppapp	WT_Sample2	158		2.4028						1
ABprpppapp	WT_Sample2	159		2.6069						1
ABprpppapp	WT_Sample2	160		2.5019						1
ABprpppapp	WT_Sample2	161		2.3153						1
MSaaappa	WT_Sample2	149		2.2395		0.9071				1
MSaaappa	WT_Sample2	151		4.1174						1
MSaaappa	WT_Sample2	159		4.0182						1
MSaaappa	WT_Sample2	160		4.3507						1
MSaaappa	WT_Sample2	161		4.1582						1
MSaaappa	WT_Sample2	162		3.6975						1
MSaaappa	WT_Sample2	163		3.3417						1
MSaaappa	WT_Sample2	164		2.7585						1
MSaaappa	WT_Sample2	165		2.3445						1
MSaaappa	WT_Sample2	166		2.3911						1
MSaaappa	WT_Sample2	167		2.5428	0.4573					1
MSaaappa	WT_Sample2	168		2.5719	0.472					1
MSaaappa	WT_Sample2	169		2.4378						1
MSaaappa	WT_Sample2	170		2.4844						1
MSaaappa	WT_Sample2	171		2.4028						1
MSaaappa	WT_Sample2	172		3.3942		1.1118				1
MSaaappa	WT_Sample2	174		2.9802						1
MSaaappa	WT_Sample2	176		2.8052						1
MSaaappa	WT_Sample2	177		2.4378						1
MSaaappa	WT_Sample2	178		2.5836						1
MSaaappa	WT_Sample2	179		2.3911						1
MSaaappa	WT_Sample2	180		2.3561						1
MSaaappa	WT_Sample2	181		2.3678						1
MSaaappa	WT_Sample2	182		2.4436						1
MSaaappa	WT_Sample2	183		2.5952						1
MSaaappa	WT_Sample2	184		2.6069						1
MSaaappa	WT_Sample2	185		3.7208						1
MSaaappa	WT_Sample2	186		2.5836						1
MSaaappa	WT_Sample2	187		2.4903	0.4803					1
MSapaapa	WT_Sample2	169		3.5284						1
MSapaapa	WT_Sample2	170		3.3709						1
MSapaapa	WT_Sample2	171		2.6069			0.528			1
MSapaapa	WT_Sample2	172		2.8927						1
MSapaapa	WT_Sample2	173		2.5136			0.5449			1
MSapaapa	WT_Sample2	174		3.5284						1
MSapaapa	WT_Sample2	175		2.9802						1
MSapaapa	WT_Sample2	176		3.5575						1
MSapaapa	WT_Sample2	178		4.1116						1
MSapaapa	WT_Sample2	179		4.1349						1
MSapaapa	WT_Sample2	182		4.1174						1
MSapaapa	WT_Sample2	183		2.5661			0.5354			1
MSapaapa	WT_Sample2	184		2.4028	0.48		0.5649			1
MSapaapa	WT_Sample2	185		2.2803	0.6016		0.5871			1
MSapaapa	WT_Sample2	186		2.5369	0.4615		0.5407			1
MSapaapa	WT_Sample2	187		4.0299	0.5724					1
MSapaapa	WT_Sample2	188		2.6944	0.6185		0.5121			1
MSapaapa	WT_Sample2	189		2.6536			0.5195			1
MSapaapa	WT_Sample2	190		2.6769	0.4707		0.5153			1
MSapaapa	WT_Sample2	191		2.741	0.5754		0.5037			1
MSapaapa	WT_Sample2	192		2.5836	0.5264		0.5322			1
MSapaapa	WT_Sample2	193		2.4261			0.5607			1
MSapaapa	WT_Sample2	194		2.4553	0.5306		0.5554			1
MSapaapa	WT_Sample2	195		2.4028			0.5649			1
MSappaap	WT_Sample2	195		2.9918	0.5652		0.874
MSappapa	WT_Sample2	158		3.0443						1
MSappapa	WT_Sample2	159		3.505						1
MSappapa	WT_Sample2	160		3.091						1
MSappapa	WT_Sample2	161		3.0443						1
MSappapa	WT_Sample2	162		2.9685						1
MSappapa	WT_Sample2	163		3.0268						1
MSappapa	WT_Sample2	164		2.3503						1
MSappapa	WT_Sample2	165		2.7469						1
MSappapa	WT_Sample2	166		2.292						1
MSappapa	WT_Sample2	167		2.2453						1
MSappapa	WT_Sample2	168		2.3036						1
MSappapa	WT_Sample2	169		2.3328						1
MSappapa	WT_Sample2	170		2.3561						1
MSappapa	WT_Sample2	171		2.5311						1
MSappapa	WT_Sample2	172		2.7119		1.251				1
MSappapa	WT_Sample2	174		2.3503						1
MSappapa	WT_Sample2	175		2.3153						1
MSappapa	WT_Sample2	176		2.5544						1
MSappapa	WT_Sample2	177		2.2803						1
MSappapa	WT_Sample2	178		2.397						1
MSappapa	WT_Sample2	179		2.2045						1
MSappapa	WT_Sample2	180		2.3153						1
MSpaaaaa	WT_Sample2	163		2.7585		1.2344	0.9256
MSppaapa	WT_Sample2	163		4.4906						1
MSppaapa	WT_Sample2	164		2.8402			0.4979			1
MSppaapa	WT_Sample2	165		2.8402			0.4979			1
MSppaapa	WT_Sample2	166		2.6536			0.5309			1
MSppaapa	WT_Sample2	167		2.8693			0.4928			1
MSppaapa	WT_Sample2	168		2.3153			0.5907			1
MSppaapa	WT_Sample2	169		2.4669			0.5639			1
MSppaapa	WT_Sample2	170		2.6127			0.5381			1
MSppaapa	WT_Sample2	171		2.6011			0.5402			1
MSppaapa	WT_Sample2	172		3.4759						1
MSppaapa	WT_Sample2	173		2.3795	0.4895		0.5794			1
MSppaapa	WT_Sample2	174		2.2628	0.5926		0.6			1
MSppaapa	WT_Sample2	176		2.5078	0.8548		0.5567			1
MSppaapa	WT_Sample2	177		2.5544	0.5279		0.5485			1
MSpppaaa	WT_Sample2	156		4.1699	0.5781	0.7682	0.8345			1
MSpppapa	WT_Sample2	159		3.4817						1
MSpppapa	WT_Sample2	160		2.706			0.5583			1
MSpppapa	WT_Sample2	161		2.292			0.6259			1
MSpppapa	WT_Sample2	162		2.4028			0.6078			1
MSpppapa	WT_Sample2	163		2.8518			0.5345			1
MSpppapa	WT_Sample2	164		2.3036			0.624			1
MSpppapa	WT_Sample2	165		2.397			0.6088			1
MSpppapa	WT_Sample2	166		2.3678			0.6135			1
MSpppapa	WT_Sample2	167		1.9421			0.683			1
MSpppapa	WT_Sample2	168		2.5428			0.585			1
MSpppapa	WT_Sample2	169		2.4144			0.6059			1
MSpppapa	WT_Sample2	170		2.4436			0.6011			1
MSpppapa	WT_Sample2	171		2.4378			0.6021			1
ABalaaaalpa	WT_Sample2	175		2.8693		0.9185	0.6615			1
ABalaaaalpa	WT_Sample2	188		4.1932	0.5507		0.5053			1
ABalaaaarlp	WT_Sample2	191		3.8433			0.6738
ABalaaaarrp	WT_Sample2	183		3.47			0.5758
ABalaaapall	WT_Sample2	194		3.1784	0.5576		0.7817
ABalaaapall	WT_Sample2	195		3.2659	0.5042		0.7757
ABalaapaaal	WT_Sample2	188		4.3623			0.5915			1
ABalaapaaal	WT_Sample2	190		4.4265			0.5855			1
ABalaapaaal	WT_Sample2	191		3.3242			0.6887			1
ABalaapaaal	WT_Sample2	192		2.6361			0.7531			1
ABalaapaaal	WT_Sample2	193		3.2659			0.6942			1
ABalaapaaal	WT_Sample2	194		2.9218			0.7264			1
ABalaapaaal	WT_Sample2	195		3.4525			0.6767			1
ABalaapaapp	WT_Sample2	195		2.6127			0.7441
ABalaapappa	WT_Sample2	178		2.6886	0.6621		0.7567			1
ABalaapappa	WT_Sample2	179		1.8954	0.6187		0.8285			1
ABalaapappa	WT_Sample2	180		2.7585	0.696		0.7504			1
ABalaapappa	WT_Sample2	181		2.4611	0.6684		0.7773			1
ABalaapappa	WT_Sample2	183		3.2309	0.7184		0.7077			1
ABalaapappa	WT_Sample2	185		3.9483	0.7833		0.6427			1
ABalaapappa	WT_Sample2	186		4.1291	0.7104		0.6264			1
ABalaapappa	WT_Sample2	187		3.5867	0.7603		0.6755			1
ABalaapappa	WT_Sample2	189		3.4176	0.7527		0.6908			1
ABalaapappp	WT_Sample2	185		3.5575	0.7833		0.579
ABalaapappp	WT_Sample2	190		3.8608	0.7483		0.5431
ABalaapappp	WT_Sample2	191		2.5078	0.6086		0.7032
ABalaapappp	WT_Sample2	192		4.4148	0.5212
ABalaapappp	WT_Sample2	193		3.9949	0.5584		0.5273
ABalaapappp	WT_Sample2	194		3.5225	0.4825		0.5832
ABalaapappp	WT_Sample2	195		3.4467	0.5855		0.5921
ABalaappapp	WT_Sample2	189		3.6858	0.5233		0.764
ABalaapppap	WT_Sample2	185		4.1874						1
ABalaapppap	WT_Sample2	186		3.54			0.5605			1
ABalaapppap	WT_Sample2	187		3.3009			0.5902			1
ABalaapppap	WT_Sample2	188		3.7266			0.5373			1
ABalaapppap	WT_Sample2	189		3.0443			0.622			1
ABalaapppap	WT_Sample2	190		2.6536	0.4917		0.6705			1
ABalaapppap	WT_Sample2	191		2.8169			0.6503			1
ABalaapppap	WT_Sample2	192		2.5428	0.6918		0.6843			1
ABalaapppap	WT_Sample2	193		2.4261	0.4917		0.6988			1
ABalaapppap	WT_Sample2	194		2.5602			0.6821			1
ABalaapppap	WT_Sample2	195		2.6186			0.6749			1
ABalapaaapp	WT_Sample2	168		3.7092			0.6445
ABalapaapap	WT_Sample2	187		4.3973			0.5882			1
ABalapaapap	WT_Sample2	188		4.3448			0.5931			1
ABalapaapap	WT_Sample2	189		4.3973			0.5882			1
ABalapaapap	WT_Sample2	190		3.3359	0.4815		0.6876			1
ABalapaapap	WT_Sample2	191		3.5867			0.6641			1
ABalapaapap	WT_Sample2	192		4.0766			0.6182			1
ABalapaapap	WT_Sample2	193		2.9627	0.4748		0.7226			1
ABalapaapap	WT_Sample2	194		2.9976			0.7193			1
ABalapapapp	WT_Sample2	173		2.3736		0.9273	0.8091
ABalappapaa	WT_Sample2	190		4.1349			0.7281
ABalappapaa	WT_Sample2	192		3.6567	0.482		0.7596
ABalappappp	WT_Sample2	167		2.9627	0.6665		0.8357
ABalappappp	WT_Sample2	168		2.3503	0.6291		0.8697
ABalapppapa	WT_Sample2	186		2.9627		1.1344	0.9129
ABalapppapp	WT_Sample2	183		3.82			0.7293
ABalapppapp	WT_Sample2	184		4.1815			0.7037
ABalpaaaaaa	WT_Sample2	157		2.327		0.8655	0.8655
ABalpaaaaaa	WT_Sample2	194		3.6275		0.6673	0.7904
ABalpaaaaap	WT_Sample2	182		2.4844		1.4684	0.8048
ABalpaaaapa	WT_Sample2	189		2.706	0.7017	1.3801	0.8005
ABalpaaaapp	WT_Sample2	180		3.8841			0.5267			1
ABalpaaaapp	WT_Sample2	181		2.6711			0.6745			1
ABalpaaaapp	WT_Sample2	182		2.6477			0.6773			1
ABalpaaaapp	WT_Sample2	183		2.811			0.6574			1
ABalpaaaapp	WT_Sample2	184		2.706			0.6702			1
ABalpaaaapp	WT_Sample2	185		2.7294			0.6674			1
ABalpaaaapp	WT_Sample2	186		2.7585			0.6638			1
ABalpaaaapp	WT_Sample2	187		2.4669			0.6994			1
ABalpaaaapp	WT_Sample2	188		2.706			0.6702			1
ABalpaaaapp	WT_Sample2	189		3.3359	0.7017		0.5935			1
ABalpaaaapp	WT_Sample2	190		3.4292			0.5821			1
ABalpaaaapp	WT_Sample2	191		2.6652	0.5721		0.6752			1
ABalpaaaapp	WT_Sample2	192		2.5836	1.5227		0.6851			1
ABalpaaaapp	WT_Sample2	193		2.916	0.7394		0.6446			1
ABalpaaaapp	WT_Sample2	194		2.5952	0.6962		0.6837			1
ABalpaaaapp	WT_Sample2	195		2.5952			0.6837			1
ABalpaaapap	WT_Sample2	179		4.4848						1
ABalpaaapap	WT_Sample2	182		2.6827			0.5178			1
ABalpaaapap	WT_Sample2	183		2.5777			0.5367			1
ABalpaaapap	WT_Sample2	184		2.6594			0.522			1
ABalpaaapap	WT_Sample2	185		2.5544			0.5409			1
ABalpaaapap	WT_Sample2	186		2.4844			0.5535			1
ABalpaaapap	WT_Sample2	187		2.362			0.5755			1
ABalpaaapap	WT_Sample2	188		3.1143						1
ABalpaaapap	WT_Sample2	189		2.4028			0.5681			1
ABalpaaapap	WT_Sample2	190		2.3678			0.5744			1
ABalpaaapap	WT_Sample2	191		2.2395			0.5975			1
ABalpaaapap	WT_Sample2	192		2.6652			0.521			1
ABalpaaapap	WT_Sample2	193		3.3592						1
ABalpaaapap	WT_Sample2	194		3.575						1
ABalpaaapap	WT_Sample2	195		2.8927						1
ABalpaaappa	WT_Sample2	182		3.3067			0.7804			1
ABalpaaappa	WT_Sample2	183		3.7675			0.7499			1
ABalpaaappa	WT_Sample2	184		4.4848			0.7022			1
ABalpaaappa	WT_Sample2	185		3.7383			0.7518			1
ABalpaaappa	WT_Sample2	186		3.0326	0.5236		0.7986			1
ABalpaaappa	WT_Sample2	187		2.5019	0.5543		0.8339			1
ABalpaaappa	WT_Sample2	188		2.8344	0.5159		0.8118			1
ABalpaaappa	WT_Sample2	189		3.3884	0.4905		0.775			1
ABalpaaappa	WT_Sample2	190		2.5311	0.5321		0.8319			1
ABalpaaappa	WT_Sample2	191		3.2368	0.5625		0.7851			1
ABalpaaappa	WT_Sample2	192		3.575			0.7626			1
ABalpaaappa	WT_Sample2	193		3.1026	0.4828		0.794			1
ABalpaaappa	WT_Sample2	194		2.7819			0.8153			1
ABalpaaappa	WT_Sample2	195		2.7702			0.8161			1
ABalpaappap	WT_Sample2	191		3.2718			0.6963
ABalpaapppa	WT_Sample2	163		2.222		1.0513	0.824
ABalpaapppa	WT_Sample2	175		4.514			0.6425
ABalpaapppa	WT_Sample2	191		2.8927			0.7709
ABalpaapppp	WT_Sample2	173		3.0676	0.7764	0.9495	0.8408
ABalpapaaaa	WT_Sample2	163		3.0618			0.6741
ABalpapaaaa	WT_Sample2	164		2.7294			0.7095
ABalpapaaaa	WT_Sample2	165		2.9743			0.6834
ABalpapaaaa	WT_Sample2	166		3.0793			0.6723
ABalpapaaaa	WT_Sample2	167		3.1143			0.6685
ABalpapaaaa	WT_Sample2	169		3.8841	0.7666		0.5866
ABalpapaaaa	WT_Sample2	171		3.505	0.6571		0.6269
ABalpapaaaa	WT_Sample2	172		2.8635	0.6679		0.6952
ABalpapaaap	WT_Sample2	169		3.0501	0.7666		0.8298
ABalpapaaap	WT_Sample2	170		2.4028	0.7091		0.8659
ABalpapaapp	WT_Sample2	161		2.7819						1
ABalpapaapp	WT_Sample2	162		2.9043						1
ABalpapaapp	WT_Sample2	163		2.3095						1
ABalpapaapp	WT_Sample2	164		2.7235						1
ABalpapaapp	WT_Sample2	165		2.5952						1
ABalpapaapp	WT_Sample2	166		2.4494						1
ABalpapaapp	WT_Sample2	167		3.1085						1
ABalpapaapp	WT_Sample2	168		4.339			0.491			1
ABalpapaapp	WT_Sample2	169		3.2193						1
ABalpapaapp	WT_Sample2	170		3.2193						1
ABalpapaapp	WT_Sample2	171		4.4731			0.5371			1
ABalpapaapp	WT_Sample2	180		3.2543		1.0681				1
ABalpapaapp	WT_Sample2	182		2.3795						1
ABalpapaapp	WT_Sample2	183		2.2978						1
ABalpapaapp	WT_Sample2	184		2.2628						1
ABalpapaapp	WT_Sample2	185		2.6769						1
ABalpapaapp	WT_Sample2	186		2.6652						1
ABalpapaapp	WT_Sample2	187		2.8693						1
ABalpapaapp	WT_Sample2	188		2.9743						1
ABalpapaapp	WT_Sample2	189		2.5311						1
ABalpapaapp	WT_Sample2	190		2.3911	0.7486					1
ABalpapaapp	WT_Sample2	191		2.4086						1
ABalpapaapp	WT_Sample2	192		2.4144						1
ABalpapaapp	WT_Sample2	193		2.916						1
ABalpapaapp	WT_Sample2	194		2.5952						1
ABalpapapaa	WT_Sample2	164		3.7558			0.7456
ABalpapappa	WT_Sample2	180		1.8196			0.7995			1
ABalpapappa	WT_Sample2	182		3.056			0.6632			1
ABalpapappa	WT_Sample2	183		3.2426			0.6427			1
ABalpapappa	WT_Sample2	184		3.126			0.6555			1
ABalpapappa	WT_Sample2	185		2.6711			0.7057			1
ABalpapappa	WT_Sample2	186		2.7294			0.6992			1
ABalpapappa	WT_Sample2	187		2.9277			0.6774			1
ABalpapappa	WT_Sample2	188		2.5078			0.7237			1
ABalpapappa	WT_Sample2	189		2.6419			0.7089			1
ABalpapappa	WT_Sample2	190		3.0385			0.6652			1
ABalpapappa	WT_Sample2	191		3.3242			0.6337			1
ABalpapappa	WT_Sample2	192		2.8052			0.6909			1
ABalpapappa	WT_Sample2	193		2.4028			0.7352			1
ABalpapappa	WT_Sample2	194		2.7585			0.696			1
ABalpapappa	WT_Sample2	195		2.2512			0.7519			1
ABalpapappp	WT_Sample2	163		4.2749			0.7151
ABalpappaaa	WT_Sample2	167		3.4176						1
ABalpappaaa	WT_Sample2	168		2.8635						1
ABalpappaaa	WT_Sample2	169		3.2193						1
ABalpappaaa	WT_Sample2	170		3.021						1
ABalpappaaa	WT_Sample2	171		2.7469						1
ABalpappaaa	WT_Sample2	172		2.5836						1
ABalpappaaa	WT_Sample2	173		2.7877						1
ABalpappaaa	WT_Sample2	174		2.6886						1
ABalpappaaa	WT_Sample2	175		2.4961						1
ABalpappaaa	WT_Sample2	176		2.5661						1
ABalpappaaa	WT_Sample2	177		2.4844						1
ABalpappaaa	WT_Sample2	178		2.8868						1
ABalpappaaa	WT_Sample2	179		2.292						1
ABalpappaaa	WT_Sample2	180		2.3503		1.9749				1
ABalpappaaa	WT_Sample2	182		2.811	0.5157					1
ABalpappaaa	WT_Sample2	183		2.257						1
ABalpappaaa	WT_Sample2	184		2.6361						1
ABalpappaaa	WT_Sample2	185		2.2861						1
ABalpappaaa	WT_Sample2	186		2.5253						1
ABalpappaaa	WT_Sample2	187		2.3853						1
ABalpappaaa	WT_Sample2	188		2.5602						1
ABalpappaaa	WT_Sample2	189		2.4378						1
ABalpappaaa	WT_Sample2	190		2.5253						1
ABalpappaaa	WT_Sample2	191		2.2337						1
ABalpappaaa	WT_Sample2	192		2.7119						1
ABalpappaaa	WT_Sample2	193		2.6944						1
ABalpappaaa	WT_Sample2	194		2.6594						1
ABalpapppap	WT_Sample2	187		3.2776	0.5606		0.7289			1
ABalpapppap	WT_Sample2	188		2.7527	0.5117		0.7723			1
ABalpapppap	WT_Sample2	189		2.5602	0.515		0.7882			1
ABalpapppap	WT_Sample2	190		2.1812	0.4967		0.8196			1
ABalpapppap	WT_Sample2	191		2.3911	0.4692		0.8022			1
ABalpapppap	WT_Sample2	192		2.3678	0.5026		0.8041			1
ABalpapppap	WT_Sample2	193		2.327	0.4587		0.8075			1
ABalpapppap	WT_Sample2	194		2.2278	0.5045		0.8157			1
ABalpapppap	WT_Sample2	195		2.362	0.4798		0.8046			1
ABalpappppa	WT_Sample2	157		2.9335			0.9247
ABalpappppa	WT_Sample2	159		2.6944		0.842	0.9308
ABalpappppp	WT_Sample2	183		2.4378	0.4774		0.9537
ABalpappppp	WT_Sample2	184		2.1812	0.4581		0.9586
ABalpappppp	WT_Sample2	185		2.2628	0.4819		0.957
ABalpappppp	WT_Sample2	186		2.1578	0.5401		0.959
ABalpappppp	WT_Sample2	187		2.2395	0.529	0.7283	0.9574
ABalppaappp	WT_Sample2	189		2.9685		0.9511	0.7461
ABalppapaaa	WT_Sample2	164		2.7294		0.8349	0.774
ABalppapapa	WT_Sample2	174		2.9102			0.6441
ABalppapapa	WT_Sample2	175		2.741	0.8391	0.9301	0.6648
ABalppapapa	WT_Sample2	177		2.8577	0.8282	0.8459	0.6505
ABalppapapa	WT_Sample2	182		2.7469		0.7989	0.6641
ABalppapapp	WT_Sample2	175		2.8402	0.8391		0.8349
ABalppapapp	WT_Sample2	177		3.1026	0.8282		0.8196
ABalpppaaaa	WT_Sample2	184		3.75	0.4968		0.6732
ABalpppaapv	WT_Sample2	184		4.0299						1
ABalpppappa	WT_Sample2	157		4.5023						1
ABalpppappa	WT_Sample2	158		4.1232						1
ABalpppappa	WT_Sample2	159		3.9424						1
ABalpppappa	WT_Sample2	160		3.9308						1
ABalpppappa	WT_Sample2	161		3.5867						1
ABalpppappa	WT_Sample2	162		3.68						1
ABalpppappa	WT_Sample2	163		4.4032						1
ABalpppappa	WT_Sample2	164		2.4319						1
ABalpppappa	WT_Sample2	165		2.2978						1
ABalpppappa	WT_Sample2	166		2.6419						1
ABalpppappa	WT_Sample2	167		2.7644						1
ABalpppappa	WT_Sample2	168		2.6011						1
ABalpppappa	WT_Sample2	169		2.5661						1
ABalpppappa	WT_Sample2	170		2.5311		2.053				1
ABalpppappa	WT_Sample2	172		2.397						1
ABalpppappa	WT_Sample2	173		2.6186		1.5859				1
ABalpppappa	WT_Sample2	175		2.0179						1
ABalpppappa	WT_Sample2	176		2.257						1
ABalpppappa	WT_Sample2	177		2.2745						1
ABalppppaav	WT_Sample2	168		3.5983						1
ABalppppaav	WT_Sample2	169		2.8227						1
ABalppppaav	WT_Sample2	170		2.7527						1
ABalppppaav	WT_Sample2	171		2.5777						1
ABalppppaav	WT_Sample2	172		3.9833						1
ABalppppaav	WT_Sample2	173		3.1376						1
ABalppppaav	WT_Sample2	174		3.1726						1
ABalppppaav	WT_Sample2	175		4.5256						1
ABalppppaav	WT_Sample2	176		3.8316						1
ABalppppaav	WT_Sample2	177		4.5256						1
ABalppppaav	WT_Sample2	178		2.9277						1
ABalppppaav	WT_Sample2	179		2.6652						1
ABalppppaav	WT_Sample2	180		2.3503						1
ABalppppaav	WT_Sample2	181		2.741						1
ABalppppaav	WT_Sample2	182		3.091						1
ABalppppaav	WT_Sample2	183		3.3709						1
ABalppppaav	WT_Sample2	184		2.7527						1
ABalppppaav	WT_Sample2	185		2.2861		1.3988				1
ABalppppaav	WT_Sample2	188		2.9393						1
ABalppppaav	WT_Sample2	189		3.4001						1
ABalppppaav	WT_Sample2	190		3.0735	0.4613					1
ABalppppaav	WT_Sample2	191		2.5194						1
ABalppppaav	WT_Sample2	192		2.6361						1
ABalppppaav	WT_Sample2	193		2.7235						1
ABalppppaav	WT_Sample2	194		2.6944						1
ABalppppaav	WT_Sample2	195		2.8635						1
ABalppppapa	WT_Sample2	191		3.9891			0.884
ABalppppapp	WT_Sample2	165		4.0066						1
ABalppppapp	WT_Sample2	166		2.881			0.5035			1
ABalppppapp	WT_Sample2	167		2.6127			0.5497			1
ABalppppapp	WT_Sample2	168		2.2861			0.606			1
ABalppppapp	WT_Sample2	169		2.1345			0.6322			1
ABalppppapp	WT_Sample2	170		2.2045			0.6201			1
ABalppppapp	WT_Sample2	171		2.292			0.605			1
ABalppppapp	WT_Sample2	172		2.2395			0.6141			1
ABalppppapp	WT_Sample2	173		2.6011			0.5518			1
ABalppppapp	WT_Sample2	174		2.4319			0.5809			1
ABaraaaaapa	WT_Sample2	186		4.4615			0.6646
ABaraaaaapp	WT_Sample2	166		2.4903		0.7927	0.8109
ABaraaaaapp	WT_Sample2	187		4.4323			0.6634
ABaraaaapaa	WT_Sample2	191		3.5284			0.6313			1
ABaraaaapaa	WT_Sample2	192		3.785			0.6045			1
ABaraaaapaa	WT_Sample2	193		2.8985			0.6971			1
ABaraaaapaa	WT_Sample2	194		2.8402			0.7032			1
ABaraaaapaa	WT_Sample2	195		2.4728	0.4787		0.7416			1
ABaraaapaap	WT_Sample2	192		2.4669	0.6081	1.0073	0.8975
ABaraaapppa	WT_Sample2	176		3.2776	0.4572		0.7226
ABaraaapppp	WT_Sample2	186		2.4144		1.3052	0.8131
ABaraapaaap	WT_Sample2	195		2.3736			0.8311
ABarapaaaap	WT_Sample2	184		3.68	0.4643		0.731
ABarapaaapp	WT_Sample2	182		4.2515			0.5452			1
ABarapaaapp	WT_Sample2	183		2.8927			0.6906			1
ABarapaaapp	WT_Sample2	184		2.6536			0.7162			1
ABarapaaapp	WT_Sample2	185		2.6594			0.7155			1
ABarapaaapp	WT_Sample2	186		2.6186			0.7199			1
ABarapaaapp	WT_Sample2	187		2.6886			0.7124			1
ABarapaaapp	WT_Sample2	188		2.4961			0.733			1
ABarapaaapp	WT_Sample2	189		2.4378	0.8831		0.7392			1
ABarapaaapp	WT_Sample2	190		2.4669			0.7361			1
ABarapaaapp	WT_Sample2	191		2.4203	0.65		0.7411			1
ABarapaaapp	WT_Sample2	192		2.5311			0.7293			1
ABarapaaapp	WT_Sample2	193		2.9802			0.6812			1
ABarapaaapp	WT_Sample2	194		3.0268			0.6762			1
ABarapaaapp	WT_Sample2	195		3.2718			0.65			1
ABarapaapap	WT_Sample2	181		3.8141			0.6626			1
ABarapaapap	WT_Sample2	182		3.2718			0.7106			1
ABarapaapap	WT_Sample2	183		3.1959			0.7173			1
ABarapaapap	WT_Sample2	184		2.6769			0.7632			1
ABarapaapap	WT_Sample2	185		2.7877			0.7534			1
ABarapaapap	WT_Sample2	186		2.5719			0.7725			1
ABarapaapap	WT_Sample2	187		2.4494			0.7833			1
ABarapaapap	WT_Sample2	188		2.8285			0.7498			1
ABarapaapap	WT_Sample2	189		2.3095			0.7957			1
ABarapaapap	WT_Sample2	190		2.6069			0.7694			1
ABarapapaaa	WT_Sample2	172		3.3651						1
ABarapapaaa	WT_Sample2	173		2.846						1
ABarapapaaa	WT_Sample2	174		2.7119						1
ABarapapaaa	WT_Sample2	175		2.4261						1
ABarapapaaa	WT_Sample2	176		2.2103						1
ABarapapaaa	WT_Sample2	177		2.5544						1
ABarapapaaa	WT_Sample2	178		2.5136						1
ABarapapaaa	WT_Sample2	179		2.5078						1
ABarapapaaa	WT_Sample2	180		2.5078						1
ABarapapaaa	WT_Sample2	181		2.397						1
ABarapapaaa	WT_Sample2	182		2.3036						1
ABarapapaaa	WT_Sample2	183		2.4436						1
ABarapapaaa	WT_Sample2	184		2.362						1
ABarapapaaa	WT_Sample2	185		2.7177						1
ABarapapaaa	WT_Sample2	186		2.7002	0.5176					1
ABarapapaaa	WT_Sample2	187		2.397	0.6965					1
ABarapapaaa	WT_Sample2	188		2.4144	0.6649					1
ABarapapaaa	WT_Sample2	189		2.6594	0.6993					1
ABarapapaaa	WT_Sample2	190		2.7877	0.8011					1
ABarapapaaa	WT_Sample2	191		2.6769	0.7428	11.6266				1
ABarapapaaa	WT_Sample2	193		2.5836	0.7278					1
ABarapapaaa	WT_Sample2	194		2.6302	0.703					1
ABarapapaaa	WT_Sample2	195		2.8577	0.6907					1
ABarapapaap	WT_Sample2	190		3.1551	0.8011		0.8821
ABarapappap	WT_Sample2	182		3.7908						1
ABarapappap	WT_Sample2	183		3.9133						1
ABarapappap	WT_Sample2	184		2.7469	0.469		0.5845			1
ABarapappap	WT_Sample2	185		2.951			0.5536			1
ABarapappap	WT_Sample2	186		2.5253			0.618			1
ABarapappap	WT_Sample2	187		2.5952			0.6074			1
ABarapappap	WT_Sample2	188		2.4203			0.6339			1
ABarapappap	WT_Sample2	189		2.7177			0.5889			1
ABarapappap	WT_Sample2	190		3.1668			0.521			1
ABarapappap	WT_Sample2	191		2.6069			0.6056			1
ABarapappap	WT_Sample2	192		2.4669	0.4564		0.6268			1
ABarapappap	WT_Sample2	193		2.4786	0.5023		0.6251			1
ABarapappap	WT_Sample2	194		2.4553			0.6286			1
ABarapappap	WT_Sample2	195		2.2453	0.536		0.6603			1
ABarappaaaa	WT_Sample2	190		2.7119	0.7436	0.8005	0.8346
ABarappaaap	WT_Sample2	190		3.0501	0.7436		0.7981			1
ABarappaaap	WT_Sample2	191		2.6419			0.8252			1
ABarappaaap	WT_Sample2	192		2.2453			0.8514			1
ABarappaaap	WT_Sample2	193		2.4494			0.8379			1
ABarappaaap	WT_Sample2	194		2.3211	0.6064		0.8464			1
ABarappaaap	WT_Sample2	195		2.257			0.8506			1
ABarappaapa	WT_Sample2	181		2.4494	0.6557		0.788
ABarappaapa	WT_Sample2	185		3.3242	0.5998		0.7123
ABarappaapa	WT_Sample2	186		3.4292	0.5906		0.7032
ABarappaapa	WT_Sample2	195		3.1726	0.5925		0.7254
ABarappaapp	WT_Sample2	169		4.3332			0.5944			1
ABarappaapp	WT_Sample2	170		2.9452						1
ABarappaapp	WT_Sample2	171		3.4875						1
ABarappaapp	WT_Sample2	172		2.5136						1
ABarappaapp	WT_Sample2	173		2.5894						1
ABarappaapp	WT_Sample2	174		2.6536						1
ABarappaapp	WT_Sample2	175		2.3795						1
ABarappaapp	WT_Sample2	176		2.4669						1
ABarappaapp	WT_Sample2	177		2.397						1
ABarappaapp	WT_Sample2	178		3.2309						1
ABarappaapp	WT_Sample2	179		3.2892						1
ABarappaapp	WT_Sample2	180		4.2049			0.5472			1
ABarappaapp	WT_Sample2	181		2.7585	0.6557					1
ABarappaapp	WT_Sample2	182		2.362						1
ABarappaapp	WT_Sample2	183		2.7177						1
ABarappaapp	WT_Sample2	184		3.0035						1
ABarappaapp	WT_Sample2	185		2.7294	0.5998					1
ABarappaapp	WT_Sample2	186		2.7644	0.5906					1
ABarappaapp	WT_Sample2	187		2.9452						1
ABarappaapp	WT_Sample2	188		2.1928						1
ABarappaapp	WT_Sample2	189		2.3036						1
ABarappaapp	WT_Sample2	190		2.327	0.4695					1
ABarappaapp	WT_Sample2	191		2.3036						1
ABarappaapp	WT_Sample2	192		2.8285						1
ABarappaapp	WT_Sample2	193		2.3095						1
ABarappaapp	WT_Sample2	194		2.4786						1
ABarappaapp	WT_Sample2	195		2.9918	0.5925					1
ABarappapaa	WT_Sample2	164		2.9743
ABarappapaa	WT_Sample2	165		3.6917	0.6613
ABarappapaa	WT_Sample2	166		4.2574	0.5161
ABarappapaa	WT_Sample2	167		3.5925	0.4795
ABarappapaa	WT_Sample2	172		3.9016
ABarappapaa	WT_Sample2	175		3.6625
ABarappapaa	WT_Sample2	178		4.164
ABarappapaa	WT_Sample2	179		2.846	0.5966
ABarappapaa	WT_Sample2	182		2.4144	0.5097		0.5387
ABarappapaa	WT_Sample2	183		2.9277	0.4655
ABarappapaa	WT_Sample2	184		3.1085	0.4914
ABarappapaa	WT_Sample2	194		3.2776
ABarappapaa	WT_Sample2	195		3.3767
ABarapppaap	WT_Sample2	185		3.6975			0.514
ABarapppaap	WT_Sample2	188		3.8258			0.4971
ABarapppaap	WT_Sample2	189		3.3826			0.5554
ABarapppaap	WT_Sample2	190		4.1174
ABarapppaap	WT_Sample2	194		3.6042			0.5263
ABarapppapa	WT_Sample2	168		4.0241	0.5343	0.8393	0.5146
ABarapppapa	WT_Sample2	170		3.5983	0.6162		0.566
ABarapppapa	WT_Sample2	172		4.0999	0.6033		0.5055
ABarapppapa	WT_Sample2	173		2.951	0.646		0.644
ABarapppapa	WT_Sample2	174		3.5925	0.6578		0.5667
ABarapppapp	WT_Sample2	179		4.2282	0.6818
ABarapppapp	WT_Sample2	186		4.0299	0.6127
ABarapppapp	WT_Sample2	187		3.6275	0.7685
ABarapppapp	WT_Sample2	188		4.0416	0.5259
ABarapppapp	WT_Sample2	189		4.1116	0.5043
ABarapppapp	WT_Sample2	190		4.199	0.4769
ABarapppapp	WT_Sample2	191		2.6302	0.6145		0.5843
ABarapppapp	WT_Sample2	193		2.6477	0.7517		0.5816
ABarapppapp	WT_Sample2	194		2.4261	0.7013		0.6166
ABarapppapp	WT_Sample2	195		2.7644	0.6139		0.5631
ABarapppppp	WT_Sample2	187		3.9424		2.6984	0.6124
ABarapppppp	WT_Sample2	195		3.5808			0.6479
ABarpaaaaal	WT_Sample2	185		4.1932	0.4868	0.7488	0.7019
ABarpaaaaar	WT_Sample2	178		2.2978		0.8981	0.7899
ABarpapaaap	WT_Sample2	192		2.5369			0.7944			1
ABarpapaaap	WT_Sample2	194		2.5369			0.7944			1
ABarpapaapa	WT_Sample2	164		2.6827			0.6003			1
ABarpapaapa	WT_Sample2	165		2.3386			0.6516			1
ABarpapaapa	WT_Sample2	166		2.4086			0.6412			1
ABarpapaapa	WT_Sample2	167		2.3095			0.656			1
ABarpapaapa	WT_Sample2	168		2.292			0.6586			1
ABarpapaapa	WT_Sample2	169		2.3036			0.6568			1
ABarpapaapa	WT_Sample2	170		2.3678			0.6473			1
ABarpapaapa	WT_Sample2	171		2.3386			0.6516			1
ABarpapaapa	WT_Sample2	172		2.7235			0.5943			1
ABarpapaapa	WT_Sample2	174		2.4378			0.6368			1
ABarpapaapa	WT_Sample2	175		2.7644			0.5882			1
ABarpapaapa	WT_Sample2	176		2.8868			0.5699			1
ABplaaaaaap	WT_Sample2	173		2.7119	0.5374	0.8072	0.7693			1
ABplaaaaaap	WT_Sample2	183		2.2628		0.9655	0.8075			1
ABplaaaaaap	WT_Sample2	186		3.7325			0.6825			1
ABplaaaaapa	WT_Sample2	167		3.4992						1
ABplaaaaapa	WT_Sample2	168		3.2484						1
ABplaaaaapa	WT_Sample2	169		3.126						1
ABplaaaaapa	WT_Sample2	170		2.8693			0.5045			1
ABplaaaaapa	WT_Sample2	171		2.5719			0.5559			1
ABplaaaaapa	WT_Sample2	172		3.9016						1
ABplaaaaapa	WT_Sample2	173		2.9218			0.4955			1
ABplaaaaapa	WT_Sample2	174		3.5692						1
ABplaaaaapa	WT_Sample2	175		2.951			0.4904			1
ABplaaaaapa	WT_Sample2	176		3.2193						1
ABplaaaaapa	WT_Sample2	177		3.3242						1
ABplaaaaapa	WT_Sample2	178		3.0851						1
ABplaaaaapa	WT_Sample2	179		2.8927			0.5005			1
ABplaaaaapa	WT_Sample2	188		2.4378			0.5791			1
ABplaaaaapa	WT_Sample2	189		2.2337			0.6143			1
ABplaaaaapa	WT_Sample2	190		2.4903			0.57			1
ABplaaaaapa	WT_Sample2	191		2.3036			0.6022			1
ABplapaaaaa	WT_Sample2	175		3.2484						1
ABplapaaaaa	WT_Sample2	176		2.9685						1
ABplapaaaaa	WT_Sample2	177		2.6886						1
ABplapaaaaa	WT_Sample2	178		2.4903						1
ABplapaaaaa	WT_Sample2	179		2.8752						1
ABplapaaaaa	WT_Sample2	180		2.5544						1
ABplapaaaaa	WT_Sample2	181		2.6827						1
ABplapaaaaa	WT_Sample2	182		2.7002						1
ABplapaaaaa	WT_Sample2	183		2.8227						1
ABplapaaaaa	WT_Sample2	184		2.741						1
ABplapaaaaa	WT_Sample2	185		3.1726						1
ABplapaaaaa	WT_Sample2	186		2.3211						1
ABplapaaaaa	WT_Sample2	187		2.3795						1
ABplapaaaaa	WT_Sample2	188		2.6477						1
ABplapaaaaa	WT_Sample2	189		2.7819						1
ABplapaaaaa	WT_Sample2	190		2.5602						1
ABplapaaaaa	WT_Sample2	191		2.5019						1
ABplapaaaaa	WT_Sample2	192		2.5719						1
ABplapapppa	WT_Sample2	183		2.6361			0.6657			1
ABplapapppa	WT_Sample2	184		2.6069			0.6694			1
ABplapapppa	WT_Sample2	185		2.7177			0.6553			1
ABplapapppa	WT_Sample2	186		2.5253			0.6797			1
ABplapapppa	WT_Sample2	187		2.5544			0.676			1
ABplapapppa	WT_Sample2	188		2.5369			0.6783			1
ABplapapppa	WT_Sample2	189		2.5311			0.679			1
ABplapapppa	WT_Sample2	190		2.4961			0.6834			1
ABplapapppa	WT_Sample2	191		2.397			0.696			1
ABplapapppa	WT_Sample2	192		2.397			0.696			1
ABplapapppa	WT_Sample2	193		2.6886			0.659			1
ABplapapppa	WT_Sample2	194		3.1493			0.6006			1
ABplapapppa	WT_Sample2	195		2.7819			0.6472			1
ABplapppaap	WT_Sample2	184		3.5808						1
ABplapppaap	WT_Sample2	185		2.8927			0.5203			1
ABplapppaap	WT_Sample2	186		2.9918			0.5039			1
ABplapppaap	WT_Sample2	187		2.7294			0.5474			1
ABplapppaap	WT_Sample2	188		2.7119			0.5503			1
ABplapppaap	WT_Sample2	189		2.4378			0.5957			1
ABplapppaap	WT_Sample2	190		2.397			0.6025			1
ABplapppaap	WT_Sample2	191		2.4961			0.5861			1
ABplapppaap	WT_Sample2	192		2.6944			0.5532			1
ABplapppaap	WT_Sample2	193		2.5661			0.5745			1
ABplapppaap	WT_Sample2	194		2.6652			0.558			1
ABplapppaap	WT_Sample2	195		2.6127			0.5667			1
ABplapppapa	WT_Sample2	171		2.9452						1
ABplapppapa	WT_Sample2	172		2.327			0.5492			1
ABplapppapa	WT_Sample2	173		2.3328			0.548			1
ABplapppapa	WT_Sample2	174		2.0704			0.5989			1
ABplapppapa	WT_Sample2	175		2.3678			0.5412			1
ABplapppapa	WT_Sample2	176		2.3736			0.5401			1
ABplapppapa	WT_Sample2	177		2.2395			0.5661			1
ABplapppapa	WT_Sample2	178		2.2162			0.5706			1
ABplapppapa	WT_Sample2	179		2.2686			0.5605			1
ABplapppapa	WT_Sample2	180		2.327			0.5492			1
ABplpaaaaaa	WT_Sample2	189		4.4032			0.6787
ABplpaaaapa	WT_Sample2	162		2.6711	0.6517	1.0412	0.8419
ABplpaaaapa	WT_Sample2	170		3.5342	0.4611	0.7814	0.7909
ABplpaaaapa	WT_Sample2	174		2.2803	0.6248	0.8628	0.8651
ABplpaaappp	WT_Sample2	181		2.6536			0.7271
ABplpaaappp	WT_Sample2	188		3.2601			0.6647
ABplpaappap	WT_Sample2	173		2.9743			0.7785
ABplpaappap	WT_Sample2	174		3.6625			0.7272
ABplpappaaa	WT_Sample2	149		4.199			0.6269
ABplpappaaa	WT_Sample2	151		3.54			0.6855
ABplpappaaa	WT_Sample2	152		3.4292			0.6953
ABplpappaaa	WT_Sample2	153		3.9599			0.6482
ABplpappaaa	WT_Sample2	155		3.3826			0.6995
ABplpappaaa	WT_Sample2	156		4.0241			0.6425
ABplpappaaa	WT_Sample2	165		4.1815			0.6285
ABplppaapaa	WT_Sample2	182		3.4117						1
ABplppaapaa	WT_Sample2	183		2.8052						1
ABplppaapaa	WT_Sample2	184		2.1403			0.4941			1
ABplppaapaa	WT_Sample2	185		2.2861						1
ABplppaapaa	WT_Sample2	186		2.3736						1
ABplppaapaa	WT_Sample2	187		2.4261						1
ABplppaapaa	WT_Sample2	188		2.2628						1
ABplppaapaa	WT_Sample2	189		2.327						1
ABplppaapaa	WT_Sample2	190		2.4786						1
ABplppaapaa	WT_Sample2	191		2.3211						1
ABplppaapaa	WT_Sample2	192		2.2395						1
ABplppaapaa	WT_Sample2	193		2.3095	0.5767					1
ABplppaapaa	WT_Sample2	194		2.1637	0.5504		0.4886			1
ABplppaapaa	WT_Sample2	195		2.2861						1
ABplppaappp	WT_Sample2	166		3.3534	0.4686	0.7744	0.7457
ABplppapapa	WT_Sample2	191		2.7527		0.6814	0.8007
ABplppapapa	WT_Sample2	194		2.5952		0.8938	0.8121
ABplppapppa	WT_Sample2	168		2.2745			0.8363
ABplpppaaaa	WT_Sample2	164		2.4028	0.5063	0.9259	0.7518
ABplpppaaaa	WT_Sample2	173		3.2659			0.6627
ABplpppaaaa	WT_Sample2	174		4.0182			0.5849
ABplpppapaa	WT_Sample2	176		4.3623
ABplpppapaa	WT_Sample2	183		3.4642			0.5395
ABplpppapaa	WT_Sample2	184		4.4556
ABplpppapaa	WT_Sample2	185		2.8285	0.4978		0.624
ABplpppapaa	WT_Sample2	189		3.8316	0.5979		0.4907
ABplppppaaa	WT_Sample2	169		2.9218			0.7573
ABplppppaaa	WT_Sample2	187		2.9627		1.0315	0.7539
ABplppppapp	WT_Sample2	174		3.5634		0.7174	0.7368
ABpraaaapad	WT_Sample2	180		4.0416			0.5813
ABpraaaapad	WT_Sample2	181		4.409		0.8973	0.5432
ABpraaaapad	WT_Sample2	184		2.6536			0.7251
ABpraaaapad	WT_Sample2	186		3.6858			0.6181
ABpraaaapav	WT_Sample2	183		4.0474		0.78	0.7671
ABpraaaappa	WT_Sample2	173		2.7469			0.4905			1
ABpraaaappa	WT_Sample2	174		2.6477			0.5089			1
ABpraaaappa	WT_Sample2	175		2.7119			0.497			1
ABpraaaappa	WT_Sample2	176		2.7994						1
ABpraaaappa	WT_Sample2	177		2.741			0.4916			1
ABpraaaappa	WT_Sample2	179		2.8985						1
ABpraaaappa	WT_Sample2	180		3.1784						1
ABpraaaappa	WT_Sample2	181		2.811						1
ABpraaaappa	WT_Sample2	182		3.1551						1
ABpraaaappa	WT_Sample2	183		3.3767						1
ABpraaaappa	WT_Sample2	184		2.7294			0.4938			1
ABpraaaappa	WT_Sample2	185		2.4436			0.5468			1
ABpraaaappa	WT_Sample2	186		2.3153			0.5706			1
ABpraaapaav	WT_Sample2	182		2.7294			0.6748			1
ABpraaapaav	WT_Sample2	183		2.5836			0.6921			1
ABpraaapaav	WT_Sample2	184		2.7119			0.6769			1
ABpraaapaav	WT_Sample2	185		2.3736			0.7172			1
ABpraaapaav	WT_Sample2	186		2.4961			0.7026			1
ABpraaapaav	WT_Sample2	187		2.5544			0.6956			1
ABpraaapaav	WT_Sample2	188		2.4494	0.4826		0.7081			1
ABpraaapaav	WT_Sample2	189		2.6069			0.6894			1
ABpraaapaav	WT_Sample2	190		2.6594			0.6831			1
ABpraaapaav	WT_Sample2	191		2.4611			0.7067			1
ABpraaapaav	WT_Sample2	192		2.4086			0.713			1
ABpraaapaav	WT_Sample2	193		2.741		0.6734	0.6734			1
ABpraaapaav	WT_Sample2	195		2.7119			0.6769			1
ABpraaapapp	WT_Sample2	166		3.9949		0.8868				1
ABpraaapapp	WT_Sample2	171		4.2632	0.6216					1
ABpraaapapp	WT_Sample2	172		4.2165						1
ABpraaapapp	WT_Sample2	173		3.5342						1
ABpraaapapp	WT_Sample2	174		3.0851						1
ABpraaapapp	WT_Sample2	175		2.5952						1
ABpraaapapp	WT_Sample2	176		2.5777						1
ABpraaapapp	WT_Sample2	177		2.9218						1
ABpraaapapp	WT_Sample2	178		2.846						1
ABpraaapapp	WT_Sample2	179		2.5602						1
ABpraaapapp	WT_Sample2	180		2.4203						1
ABpraaapapp	WT_Sample2	181		2.4669						1
ABpraaapapp	WT_Sample2	182		2.846						1
ABpraaapapp	WT_Sample2	183		2.5894						1
ABpraaapapp	WT_Sample2	184		3.3009						1
ABpraaapapp	WT_Sample2	185		2.6477						1
ABpraaapapp	WT_Sample2	186		2.881						1
ABpraaapapp	WT_Sample2	187		3.4467						1
ABpraaapapp	WT_Sample2	188		3.8491						1
ABpraaapapp	WT_Sample2	189		2.3561						1
ABpraaapapp	WT_Sample2	190		2.5019						1
ABpraaapapp	WT_Sample2	191		2.5486						1
ABpraaapapp	WT_Sample2	192		2.5078						1
ABpraapaaap	WT_Sample2	178		4.4906			0.4924
ABpraapaaap	WT_Sample2	180		4.4731			0.4944
ABpraapaaap	WT_Sample2	181		2.5194	0.6067		0.7152
ABpraapaapa	WT_Sample2	162		3.6508			0.6142
ABpraapappa	WT_Sample2	167		2.741	0.8972	1.0131	0.8189
ABpraapappp	WT_Sample2	167		2.4028	0.8972	0.9725	0.9266
ABprapaaaaa	WT_Sample2	169		4.3215						1
ABprapaaaaa	WT_Sample2	170		4.1232						1
ABprapaaaaa	WT_Sample2	171		3.2951						1
ABprapaaaaa	WT_Sample2	172		4.1174						1
ABprapaaaaa	WT_Sample2	173		3.6508						1
ABprapaaaaa	WT_Sample2	174		3.5808						1
ABprapaaaaa	WT_Sample2	175		4.1407						1
ABprapaaaaa	WT_Sample2	189		2.5311			0.5124			1
ABprapaaaaa	WT_Sample2	190		2.1812			0.5798			1
ABprapaaaaa	WT_Sample2	191		2.3211			0.5528			1
ABprapaaaaa	WT_Sample2	192		2.4786			0.5225			1
ABprapaaaaa	WT_Sample2	193		2.4319			0.5315			1
ABprapaaaaa	WT_Sample2	194		2.3561			0.5461			1
ABprapaaaaa	WT_Sample2	195		2.4261			0.5326			1
ABprapapppa	WT_Sample2	164		3.0385		0.7038				1
ABprapapppa	WT_Sample2	181		4.5023						1
ABprapapppa	WT_Sample2	192		4.1291						1
ABprapapppa	WT_Sample2	193		3.9833						1
ABprapapppa	WT_Sample2	194		4.1349						1
ABprapapppa	WT_Sample2	195		2.741			0.5019			1
ABprapppapa	WT_Sample2	177		3.4409			0.4861			1
ABprapppapa	WT_Sample2	178		2.3503			0.649			1
ABprapppapa	WT_Sample2	179		2.1112			0.6847			1
ABprapppapa	WT_Sample2	180		2.1345			0.6812			1
ABprapppapa	WT_Sample2	181		2.2103			0.6699			1
ABprapppapa	WT_Sample2	182		3.7441						1
ABprapppapa	WT_Sample2	183		2.3795			0.6446			1
ABprpaaaaaa	WT_Sample2	187		3.7558			0.7469
ABprpaaaapp	WT_Sample2	186		2.7819		0.9063	0.7931
ABprpaaapap	WT_Sample2	192		3.8025	0.5108	0.6998	0.7719
ABprpaapapp	WT_Sample2	183		3.6742			0.5922			1
ABprpaapapp	WT_Sample2	184		3.7675			0.5819			1
ABprpaapapp	WT_Sample2	185		3.5459			0.6065			1
ABprpaapapp	WT_Sample2	186		4.4032		0.9495	0.5113			1
ABprpaapapp	WT_Sample2	193		3.7383	0.5444		0.5851			1
ABprpaappaa	WT_Sample2	186		3.6217	0.5641		0.807
ABprpapaaaa	WT_Sample2	186		4.3623			0.7026
ABprpapaaaa	WT_Sample2	187		4.2282	0.5652		0.7118
ABprpapaaaa	WT_Sample2	193		4.304	0.6106		0.7066
ABprpapappp	WT_Sample2	190		2.5661		0.7905	0.8438
ABprpappaaa	WT_Sample2	187		3.435	0.4844	1.1875	0.8216
ABprpappaaa	WT_Sample2	189		3.7675	0.4714	0.9894	0.8043
ABprpappaap	WT_Sample2	154		4.3448			0.7286
ABprpappaap	WT_Sample2	155		3.2193			0.7989
ABprpappaap	WT_Sample2	161		3.6392	0.5119		0.7727
ABprpappaap	WT_Sample2	163		3.6158	0.4764		0.7742
ABprpappaap	WT_Sample2	164		3.6333			0.7731
ABprpappaap	WT_Sample2	165		2.8752			0.8204
ABprpappaap	WT_Sample2	166		2.6302			0.8357
ABprpappaap	WT_Sample2	167		3.1668			0.8022
ABprpappaap	WT_Sample2	168		2.6711		0.9896	0.8332
ABprpappapa	WT_Sample2	165		3.4117	0.71		0.7529
ABprpappapa	WT_Sample2	170		3.715	0.6146		0.7309
ABprpappapp	WT_Sample2	161		3.5808	0.5122		0.7766
ABprppaaaaa	WT_Sample2	186		4.0766			0.6625
ABprppaapaa	WT_Sample2	179		3.9716			0.53			1
ABprppaapaa	WT_Sample2	180		2.8227			0.666			1
ABprppaapaa	WT_Sample2	181		2.3386			0.7233			1
ABprppaapaa	WT_Sample2	182		2.5777			0.695			1
ABprppaapaa	WT_Sample2	183		2.881			0.6591			1
ABprppaapaa	WT_Sample2	184		2.4494			0.7101			1
ABprppaapap	WT_Sample2	195		2.2045			0.8692
ABprppapppp	WT_Sample2	186		2.4844	0.4766	0.8851	0.8768
ABprpppapap	WT_Sample2	145		2.8752	0.6172	1.086	0.8998
ABprppppaap	WT_Sample2	194		3.3476	0.6196		0.8426
ABprppppaap	WT_Sample2	195		2.292			0.8922
MSaaaappa	WT_Sample2	179		3.4934			0.6266			1
MSaaaappa	WT_Sample2	180		2.8927			0.6908			1
MSaaaappa	WT_Sample2	181		3.0676			0.6721			1
MSaaaappa	WT_Sample2	182		2.4028			0.7431			1
MSaaaappa	WT_Sample2	184		2.1812			0.7668			1
MSaaaappa	WT_Sample2	185		2.2628			0.7581			1
MSaaaappa	WT_Sample2	186		2.3328			0.7506			1
MSaaaappa	WT_Sample2	187		2.1578			0.7693			1
MSaaaappa	WT_Sample2	188		2.6244			0.7195			1
MSaaaappa	WT_Sample2	189		2.3736			0.7463			1
MSaaaappa	WT_Sample2	190		2.362			0.7475			1
MSaaaappa	WT_Sample2	191		2.3095			0.7531			1
MSaapappa	WT_Sample2	195		4.3915	0.8603		0.8722
MSaapappp	WT_Sample2	195		2.5602	0.8603		0.6976
MSpaapaap	WT_Sample2	192		2.9976			0.82			1
MSpaapaap	WT_Sample2	193		2.8285			0.8301			1
MSpaapaap	WT_Sample2	194		4.2632	0.5072		0.744			1
Caa	WT_Sample2	44			0.5908	1.0167	0.9317
Cap	WT_Sample2	44			0.5908
Caaa	WT_Sample2	70			0.548	0.8638	0.5515
Caap	WT_Sample2	70			0.548
Caaa	WT_Sample2	73			0.5905		0.6145
Caap	WT_Sample2	73			0.5905
Caaa	WT_Sample2	74			0.5658		0.5591
Caap	WT_Sample2	74			0.5658
Caap	WT_Sample2	78			0.8036
Cpaa	WT_Sample2	78			0.6358	0.9315	0.979
Cpap	WT_Sample2	78			0.6358
Caap	WT_Sample2	79			0.82
Caaa	WT_Sample2	80			0.8032		0.95
Caap	WT_Sample2	80			0.8032
Caaa	WT_Sample2	81			0.6583		0.7287
Caap	WT_Sample2	81			0.6583
Cpaaa	WT_Sample2	93			0.4831	0.9355	0.9304
Cpaap	WT_Sample2	93			0.4831
Cpaaa	WT_Sample2	95			0.5336		0.9586
Cpaap	WT_Sample2	95			0.5336
Caaaa	WT_Sample2	96			0.5093		0.9669
Caaap	WT_Sample2	96			0.5093
Cpaaa	WT_Sample2	96			0.5767	1.078	0.9682
Cpaap	WT_Sample2	96			0.5767	0.8921
Caaaa	WT_Sample2	97			0.4651		0.9708
Caaap	WT_Sample2	97			0.4651
Cpaaa	WT_Sample2	97			0.5272	1.0815
Cpaap	WT_Sample2	97			0.5272	1.209	0.8887
Caaaa	WT_Sample2	98			0.5198	0.8996	0.9681
Caaap	WT_Sample2	98			0.5198	0.7365
Caaaa	WT_Sample2	99			0.5105	0.9084
Caaap	WT_Sample2	99			0.5105	1.1644	0.8492
Cpaaa	WT_Sample2	100			0.5999	0.9196	0.9196
Cpaap	WT_Sample2	100			0.5999
Caaaa	WT_Sample2	103			0.5203
Caaap	WT_Sample2	103			0.5203	0.9371	0.9253
Cpaaa	WT_Sample2	105			0.494
Cpaap	WT_Sample2	105			0.494		0.9073
Dpa	WT_Sample2	105			0.5014
Dpp	WT_Sample2	105			0.5014		0.6813
Z2	WT_Sample2	105			0.5554	1.1096	0.9141
Z3	WT_Sample2	105			0.5554
Caaaa	WT_Sample2	106			0.9615	1.9684	0.9555
Caaap	WT_Sample2	106			0.9615		0.9641
Cpaaa	WT_Sample2	106			0.5361
Cpaap	WT_Sample2	106			0.5361		0.9112
Cpaaa	WT_Sample2	107			0.7379
Cpaaa	WT_Sample2	108			0.7272
Cpaap	WT_Sample2	108			0.7272		0.9574
Cpaaa	WT_Sample2	109			0.9018	1.3329	0.8756
Cpaap	WT_Sample2	109			0.9018	1.039	0.8772
Z2	WT_Sample2	109			0.4774
Z3	WT_Sample2	109			0.4774		0.8327
Caaaa	WT_Sample2	111			0.5233		1.1728
Caaap	WT_Sample2	111			0.5233
Daaa	WT_Sample2	112			0.4743		0.6522
Daap	WT_Sample2	112			0.4743
Dapa	WT_Sample2	112			0.5894
Dapp	WT_Sample2	112			0.5894		0.919
Daaa	WT_Sample2	113			0.5555		0.6928
Daap	WT_Sample2	113			0.5555
Daap	WT_Sample2	114			0.6459
Z2	WT_Sample2	114			0.643
Z3	WT_Sample2	114			0.643	2.1747	1.3086
Daaa	WT_Sample2	116			0.7734
Daap	WT_Sample2	116			0.7734	2.0355	1.6489
Z2	WT_Sample2	116			0.4914
Z3	WT_Sample2	116			0.4914		0.8874
ABarapapap	WT_Sample2	118			0.615
ABprapppaa	WT_Sample2	118			0.4983
ABprapppap	WT_Sample2	118			0.4983	0.764	0.8834
Daaa	WT_Sample2	118			0.6735		0.8845
Daap	WT_Sample2	118			0.6735
Caaaaa	WT_Sample2	119			0.5121
Caaaap	WT_Sample2	119			0.5121	3.7648	7.1502
Caaaaa	WT_Sample2	120			0.6992
Caaaap	WT_Sample2	120			0.6992	2.5487	3.3854
Caaaaa	WT_Sample2	121			0.5673
Caaaap	WT_Sample2	121			0.5673		5.9341
Caaaaa	WT_Sample2	122			0.5298
Caaaap	WT_Sample2	122			0.5298	3.8755	6.5792
Dpaa	WT_Sample2	122			0.4799		0.9347
Dpap	WT_Sample2	122			0.4799
Caaaaa	WT_Sample2	124			0.5479	0.7819
Caaaap	WT_Sample2	124			0.5479	6.4921	6.191
Caaaap	WT_Sample2	125			0.9406
Cpaapa	WT_Sample2	125			0.7268	15.4569	21.5656
Cpaapp	WT_Sample2	125			0.7268
Caaaaa	WT_Sample2	126			0.8659	3.7571	0.7502
Caaaap	WT_Sample2	126			0.8659
Caaapp	WT_Sample2	126			0.4831
Caaaaa	WT_Sample2	127			0.7306	0.6805	4.5072
Caaaaa	WT_Sample2	128			0.6897	1.0076	5.1877
Caaaap	WT_Sample2	128			0.6897
Caaaaa	WT_Sample2	129			0.644	4.521	6.1953
Caaaap	WT_Sample2	129			0.644
Caaapp	WT_Sample2	129			0.4568
Cpaaaa	WT_Sample2	129			0.6891		1.1232
Cpaaap	WT_Sample2	129			0.6891	24.8085	26.2167
Caaaaa	WT_Sample2	130			0.856	1.666	1.6743
Caaaaa	WT_Sample2	131			0.9238
Caaaap	WT_Sample2	131			0.9238
Caaapa	WT_Sample2	131			0.4684
Caaapp	WT_Sample2	131			0.4684
Caaaaa	WT_Sample2	132			0.9012	3.2788
Caaaap	WT_Sample2	132			0.9012
Caaapa	WT_Sample2	132			0.4735	1.1343
Caaapp	WT_Sample2	132			0.4735
Earaa	WT_Sample2	132			0.5123	0.9578	0.9578
Earap	WT_Sample2	132			0.5123
Caaaaa	WT_Sample2	133			0.7584	0.8744	3.2995
Caaaap	WT_Sample2	133			0.7584	2.5424
ABaraaaaaa	WT_Sample2	134			0.4613
ABaraaaaap	WT_Sample2	134			0.4613
Caaaaa	WT_Sample2	134			0.6584	2.2008	2.4251
Caaaap	WT_Sample2	134			0.6584		2.3782
Eplaa	WT_Sample2	134			0.4969
Eplap	WT_Sample2	134			0.4969	5.8539	11.6603
Eplpp	WT_Sample2	134			0.5436
ABaraaaaaa	WT_Sample2	135			0.4607
ABaraaaaap	WT_Sample2	135			0.4607		0.5055
Caaaaa	WT_Sample2	135			0.531		4.6259
Caaaap	WT_Sample2	135			0.531	1.2309	2.8738
Caaaaa	WT_Sample2	136			0.4776		4.3119
Caaaap	WT_Sample2	136			0.4776	48.5966	4.1048
Caaapa	WT_Sample2	136			1.451	50.3536	55.1093
Caaapp	WT_Sample2	136			1.451
Eplaa	WT_Sample2	136			0.4658	0.9064
Eplap	WT_Sample2	136			0.4658	12.0615	11.5956
Eplpa	WT_Sample2	136			0.5197	2.8914	0.9615
Eplpp	WT_Sample2	136			0.5197
Caaaaa	WT_Sample2	137			2.1735	1.5349	3.8371
Caaaap	WT_Sample2	137			2.1735	8.5521	52.7014
Cpaaaa	WT_Sample2	137			0.6193	1.251
Cpaaap	WT_Sample2	137			0.6193
Eplaa	WT_Sample2	137			0.9319	1.0773	0.9489
Eplap	WT_Sample2	137			0.9319
Eplpa	WT_Sample2	137			1.0614	1.3256	1.93
Eplpp	WT_Sample2	137			1.0614
Epraa	WT_Sample2	137			0.4706
Eprap	WT_Sample2	137			0.4706	6.2902	0.685
Eprpa	WT_Sample2	137			0.4723	0.8861	0.5283
Eprpp	WT_Sample2	137			0.4723
Caaaaa	WT_Sample2	138			1.6333	2.2222	2.3023
Caaaap	WT_Sample2	138			1.6333	3.9246	44.1493
Caaaaa	WT_Sample2	139			1.3164
Caaaap	WT_Sample2	139			1.3164		40.2247
Cpaaaa	WT_Sample2	139			0.6656
Eplaa	WT_Sample2	139			0.9514	1.0479	0.9462
Eplap	WT_Sample2	139			0.9514	0.7052	0.7528
Eplpa	WT_Sample2	139			1.0096	1.3224	1.825
Eplpp	WT_Sample2	139			1.0096
ABplaaapaa	WT_Sample2	140			0.5474
ABplaaapap	WT_Sample2	140			0.5474
Cpaaaa	WT_Sample2	140			0.5925
Cpaaap	WT_Sample2	140			0.5925	0.8363
Dapa	WT_Sample2	140			0.4673
Dapp	WT_Sample2	140			0.4673
Cpaaaa	WT_Sample2	141			0.7313
Ealpa	WT_Sample2	141			0.4565
Ealpp	WT_Sample2	141			0.4565	0.9526	0.9297
Eprpa	WT_Sample2	141			0.4873		0.5711
Eprpp	WT_Sample2	141			0.4873
ABarpappaa	WT_Sample2	142			0.793
ABarpppapa	WT_Sample2	142			0.7173		0.8185
ABarpppapp	WT_Sample2	142			0.7173
Cpaaaa	WT_Sample2	142			0.5558
Cpaaap	WT_Sample2	142			0.5558	29.8246	29.3273
Cpaapa	WT_Sample2	142			0.827	15.5623	23.4769
Cpaapp	WT_Sample2	142			0.827
ABarpppapa	WT_Sample2	143			0.6291		0.6466
ABarpppapp	WT_Sample2	143			0.6291
Caaaaa	WT_Sample2	143			1.0598		3.1249
Caaaap	WT_Sample2	143			1.0598	6.7274	33.04
Cpaaaa	WT_Sample2	143			0.7668
Dapaa	WT_Sample2	143			0.5224		0.5432
Dapap	WT_Sample2	143			0.5224
Caaaaa	WT_Sample2	144			1.4194	3.3872	2.8979
Caaaap	WT_Sample2	144			1.4194	40.3334	39.7673
Cpaaaa	WT_Sample2	144			0.7891
Cpaaap	WT_Sample2	144			0.7891	56.8076
ABarpppapa	WT_Sample2	145			0.7135		0.8107
ABarpppapp	WT_Sample2	145			0.7135
ABprpppapaa	WT_Sample2	145			0.6172
Cpaaaa	WT_Sample2	145			1.7606
Cpaaap	WT_Sample2	145			1.7606	54.6475	56.7293
ABarpppapa	WT_Sample2	146			0.706		0.7837
ABarpppapp	WT_Sample2	146			0.706
Cpaaaa	WT_Sample2	146			0.649
Cpaaap	WT_Sample2	146			0.649	1.8543	2.0818
Dapaa	WT_Sample2	146			0.4808		0.5164
Dapap	WT_Sample2	146			0.4808
Dpppa	WT_Sample2	146			1.2083	4.7861	4.2978
Dpppp	WT_Sample2	146			1.2083	4.9857
Epraa	WT_Sample2	146			0.8693		0.9402
Eprap	WT_Sample2	146			0.8693
Caaaap	WT_Sample2	147			1.9514	13.9732	52.2903
Cpaaaa	WT_Sample2	147			0.766
Cpaaap	WT_Sample2	147			0.766	38.3049
Dpppa	WT_Sample2	147			1.1629		0.4883
Dpppp	WT_Sample2	147			1.1629	5.4293	5.3007
Epraa	WT_Sample2	147			0.8698	1.3222	0.9367
Eprap	WT_Sample2	147			0.8698
ABalaapapp	WT_Sample2	148			0.4729
Caaaap	WT_Sample2	148			1.182	38.6748	38.3172
Cpaaaa	WT_Sample2	148			0.7609	0.6926	0.8144
Cpaaap	WT_Sample2	148			0.7609		38.5324
Dapaa	WT_Sample2	148			0.4752	0.8224	0.5733
Dapap	WT_Sample2	148			0.4752
Dpppa	WT_Sample2	148			0.6495		0.7774
Dpppp	WT_Sample2	148			0.6495
Eplpa	WT_Sample2	148			0.482	1.5289	0.9113
Eplpp	WT_Sample2	148			0.482
ABarpppapa	WT_Sample2	149			0.7604	0.743	0.9004
ABarpppapp	WT_Sample2	149			0.7604
Caaaaa	WT_Sample2	149			0.9377
Caaaap	WT_Sample2	149			0.9377
Cpaaaa	WT_Sample2	149			0.9536
Cpaaap	WT_Sample2	149			0.9536	39.1583	39.1583
Dpppa	WT_Sample2	149			0.458		0.7291
Dpppp	WT_Sample2	149			0.458
Cpaaaa	WT_Sample2	150			0.7299
Cpaaap	WT_Sample2	150			0.7299	1.536
Dpppa	WT_Sample2	150			0.6506	4.674	0.7881
Dpppp	WT_Sample2	150			0.6506
Earaa	WT_Sample2	150			0.4731		0.8446
Earap	WT_Sample2	150			0.4731
Eplaa	WT_Sample2	150			0.9074	1.2582	0.9487
Eplap	WT_Sample2	150			0.9074
Caaaaa	WT_Sample2	151			0.9319
Cpaaaa	WT_Sample2	151			0.6865
Cpaaap	WT_Sample2	151			0.6865	0.9442	1.536
Dpppa	WT_Sample2	151			1.0826		3.8859
Dpppp	WT_Sample2	151			1.0826
Earaa	WT_Sample2	151			0.4708	0.8406	0.795
Earap	WT_Sample2	151			0.4708
Epraa	WT_Sample2	151			0.896		0.9415
Eprap	WT_Sample2	151			0.896
ABalppapaa	WT_Sample2	152			0.4624
ABalppapap	WT_Sample2	152			0.4624
ABarappaaa	WT_Sample2	152			0.4652
Caaaaa	WT_Sample2	152			0.9172	0.6818
Cpaaaa	WT_Sample2	152			0.6828
Cpaaap	WT_Sample2	152			0.6828	1.3435	2.4802
Dpppa	WT_Sample2	152			1.0409	4.4923	3.8278
Dpppp	WT_Sample2	152			1.0409
Eplaa	WT_Sample2	152			0.8795	1.6681	0.916
Eplap	WT_Sample2	152			0.8795
Epraa	WT_Sample2	152			0.8628	1.0538	0.941
Eprap	WT_Sample2	152			0.8628
Caaaaa	WT_Sample2	153			0.9495
Cpaaaa	WT_Sample2	153			0.5934	0.7438
Cpaaap	WT_Sample2	153			0.5934	1.8201	3.8237
ABplaaapaa	WT_Sample2	154			0.6239
ABplaaapap	WT_Sample2	154			0.6239	0.765	0.6072
Caaaap	WT_Sample2	154			0.9071	0.8153
Cpaaap	WT_Sample2	154			0.8502	0.7626	2.0036
MSapaaaa	WT_Sample2	154			0.5326
MSapaaap	WT_Sample2	154			0.5326		0.6707
ABarappaaa	WT_Sample2	155			0.5172
ABarappaap	WT_Sample2	155			0.5172		0.6484
Caaaaa	WT_Sample2	155			0.9423
Caaaap	WT_Sample2	155			0.9423	0.6937	0.5193
Caaapa	WT_Sample2	155			2.3592	78.7877	84.9212
Caaapp	WT_Sample2	155			2.3592
Cpaaaa	WT_Sample2	155			0.8545	2.2521	0.7984
Cpaaap	WT_Sample2	155			0.8545	1.8615	1.241
Daaaa	WT_Sample2	155			0.46
Daaap	WT_Sample2	155			0.46
ABalpappaaa	WT_Sample2	156			0.8133		2.3912			1
ABalpappaap	WT_Sample2	156			0.8133	0.7847	0.7872
Caaaaa	WT_Sample2	156			0.8744
Caaaap	WT_Sample2	156			0.8744
Cpaapa	WT_Sample2	156			0.61
Cpaapp	WT_Sample2	156			0.61
Daaaa	WT_Sample2	156			0.5275
Daaap	WT_Sample2	156			0.5275
MSpppaap	WT_Sample2	156			0.5781
ABalpappapa	WT_Sample2	157			0.4597	0.6898	0.9996
ABalpappapp	WT_Sample2	157			0.4597
ABarpaapaa	WT_Sample2	157			0.7716		0.7218
ABarpaapap	WT_Sample2	157			0.7716	0.9306	0.7626
ABplaaaapa	WT_Sample2	157			0.9166	1.9906	2.4039
ABplaaaapp	WT_Sample2	157			0.9166		0.5769
Caaaaa	WT_Sample2	157			0.8671
Caaaap	WT_Sample2	157			0.8671
Cpaaap	WT_Sample2	157			0.9445
Cpaapa	WT_Sample2	157			0.6174	3.2883
Cpaapp	WT_Sample2	157			0.6174
Daaaa	WT_Sample2	157			0.798
Daaap	WT_Sample2	157			0.798
Eplaa	WT_Sample2	157			1.291	0.7187	1.517
Eplap	WT_Sample2	157			1.291	11.0812	10.815
Eplpa	WT_Sample2	157			0.4744	1.6545	0.8996
Eplpp	WT_Sample2	157			0.4744
ABarpppapa	WT_Sample2	158			0.7444	0.9119	0.913
ABarpppapp	WT_Sample2	158			0.7444
Caaaaa	WT_Sample2	158			0.919
Caaaap	WT_Sample2	158			0.919	2.459
Caaapa	WT_Sample2	158			0.4835
Caaapp	WT_Sample2	158			0.4835
Cpaaap	WT_Sample2	158			0.9533	1.3525
Cpaapa	WT_Sample2	158			0.4752	3.5434	2.8939
Cpaapp	WT_Sample2	158			0.4752
Eplpa	WT_Sample2	158			0.4595	1.7381	0.7549
Eplpp	WT_Sample2	158			0.4595
ABalpapapaa	WT_Sample2	159			0.5081
ABalpapapap	WT_Sample2	159			0.5081		0.5114
ABarpaapaa	WT_Sample2	159			0.5013
ABarpaapap	WT_Sample2	159			0.5013		0.693
ABplaaaapa	WT_Sample2	159			0.5268	0.8604
ABplaaaapp	WT_Sample2	159			0.5268	1.7101	1.2058
ABprpaapppa	WT_Sample2	159			0.4889
ABprpaapppp	WT_Sample2	159			0.4889
ABprpappapa	WT_Sample2	159			0.4678
ABprpappapp	WT_Sample2	159			0.4678		0.6759
Caaaaa	WT_Sample2	159			0.7777
Caaaap	WT_Sample2	159			0.7777		2.1893
Caaapa	WT_Sample2	159			0.4855	7.1093
Caaapp	WT_Sample2	159			0.4855
Cpaaaa	WT_Sample2	159			0.559	1.3412
Cpaaap	WT_Sample2	159			0.559		1.0558
Cpaapp	WT_Sample2	159			0.6374	0.705
Eplaa	WT_Sample2	159			0.5174	0.9834
Eplap	WT_Sample2	159			0.5174		11.5489
Eplpp	WT_Sample2	159			0.502
ABarpaapaa	WT_Sample2	160			0.4944
ABarpaapap	WT_Sample2	160			0.4944		0.6259
ABarpppapp	WT_Sample2	160			0.7637
ABprpaapppa	WT_Sample2	160			0.4781
ABprpaapppp	WT_Sample2	160			0.4781
Caaaaa	WT_Sample2	160			0.7929	0.9593
Caaaap	WT_Sample2	160			0.7929	67.9309	1.7154
Cpaaaa	WT_Sample2	160			0.8999		0.8691
Cpaaap	WT_Sample2	160			0.8999		0.5854
Ealaa	WT_Sample2	160			0.724
Ealap	WT_Sample2	160			0.724	2.1153	2.104
Eplpp	WT_Sample2	160			0.4937
ABalpaaaapa	WT_Sample2	161			0.4981
ABalpaaaapp	WT_Sample2	161			0.4981		0.7541			1
ABarappaaa	WT_Sample2	161			0.4784
ABarappaap	WT_Sample2	161			0.4784
ABarpaapaa	WT_Sample2	161			0.5903
ABarpaapap	WT_Sample2	161			0.5903		0.697
ABarpappaa	WT_Sample2	161			0.7797
ABplaaapaa	WT_Sample2	161			0.5081
ABplaaapap	WT_Sample2	161			0.5081
ABplaapaapa	WT_Sample2	161			0.6298
ABplaapaapp	WT_Sample2	161			0.6298	0.7913	0.7853
ABprpaapppa	WT_Sample2	161			0.4811
ABprpaapppp	WT_Sample2	161			0.4811
ABprpappaaa	WT_Sample2	161			0.5119
ABprpappapa	WT_Sample2	161			0.5122	0.782
Caaaaa	WT_Sample2	161			2.9867		1.2277
Caaaap	WT_Sample2	161			2.9867	68.8381	69.6463
Cpaaaa	WT_Sample2	161			0.9072	1.0998	0.8404
Cpaaap	WT_Sample2	161			0.9072
Cpaapa	WT_Sample2	161			0.5881	1.7419	1.0938
Cpaapp	WT_Sample2	161			0.5881
Eplpa	WT_Sample2	161			0.4918	1.7167	0.7794
Eplpp	WT_Sample2	161			0.4918
ABarappaaa	WT_Sample2	162			0.4602	0.8186
ABarappaap	WT_Sample2	162			0.4602
ABarappppaa	WT_Sample2	162			0.9986	2.3574	2.3233
ABarappppap	WT_Sample2	162			0.9986
ABarpappaa	WT_Sample2	162			0.7795
ABplpaaaapp	WT_Sample2	162			0.6517
ABprpaapppa	WT_Sample2	162			0.476
ABprpaapppp	WT_Sample2	162			0.476
ABprpappaaa	WT_Sample2	162			0.5316
ABprpappaap	WT_Sample2	162			0.5316		0.5735
Caaaaa	WT_Sample2	162			0.8182		0.8095
Caaaap	WT_Sample2	162			0.8182	4.7605	0.8082
Cpaaaa	WT_Sample2	162			0.6531
Cpaaap	WT_Sample2	162			0.6531	104.886
Cpaapp	WT_Sample2	162			0.515
Dpppa	WT_Sample2	162			0.5974		0.804
Dpppp	WT_Sample2	162			0.5974
Ealaa	WT_Sample2	162			0.8448
Ealap	WT_Sample2	162			0.8448	1.9614	2.2833
Eplpa	WT_Sample2	162			0.4791	1.6854	0.9373
Eplpp	WT_Sample2	162			0.4791
ABaraaaaaaa	WT_Sample2	163			0.6274	0.7187	0.4901
ABaraaaaaap	WT_Sample2	163			0.6274
ABaraaaapa	WT_Sample2	163			0.503
ABarpapppa	WT_Sample2	163			0.6057
ABplaaapaa	WT_Sample2	163			0.5376
ABplaaapap	WT_Sample2	163			0.5376
ABprpappaaa	WT_Sample2	163			0.4764
Caaaaa	WT_Sample2	163			0.5574		0.7874
Caaaap	WT_Sample2	163			0.5574	49.4685	5.5687
Cpaaaa	WT_Sample2	163			3.9792		0.5866
Cpaaap	WT_Sample2	163			3.9792	102.862	104.942
Cpaapp	WT_Sample2	163			0.5371	1.6606
Daaaa	WT_Sample2	163			0.5394
Daaap	WT_Sample2	163			0.5394
Dpppa	WT_Sample2	163			0.6869	1.3098	0.6702
Dpppp	WT_Sample2	163			0.6869	4.4442
Ealpa	WT_Sample2	163			0.4854
Ealpp	WT_Sample2	163			0.4854		0.8999
Eplpa	WT_Sample2	163			0.4567	1.6624	0.7481
Eplpp	WT_Sample2	163			0.4567
Eprpa	WT_Sample2	163			0.4697
Eprpp	WT_Sample2	163			0.4697
MSaaaapaa	WT_Sample2	163			0.9658	2.4703	2.4567
MSaaaapap	WT_Sample2	163			0.9658
ABalappappa	WT_Sample2	164			0.5993
ABalappappp	WT_Sample2	164			0.5993		0.7083
ABalpappapa	WT_Sample2	164			0.4732		0.6612
ABalpappapp	WT_Sample2	164			0.4732
ABaraaaapa	WT_Sample2	164			0.524
ABarpaapaa	WT_Sample2	164			0.5167
ABarpaapap	WT_Sample2	164			0.5167		0.7119
ABarpappaa	WT_Sample2	164			0.7208
ABarpappap	WT_Sample2	164			0.7208	0.8288	0.8288
ABarpppapa	WT_Sample2	164			0.4872
ABarpppapp	WT_Sample2	164			0.4872
ABplaaaapa	WT_Sample2	164			0.5875	0.766	0.6592
ABplaaaapp	WT_Sample2	164			0.5875	1.9373	1.9245
ABplaaapaa	WT_Sample2	164			0.4948
ABplaaapap	WT_Sample2	164			0.4948
ABplpppaaap	WT_Sample2	164			0.5063
ABprpappapa	WT_Sample2	164			0.5498
ABprpappapp	WT_Sample2	164			0.5498		0.6923
Caaaaa	WT_Sample2	164			2.1503		0.5045
Caaaap	WT_Sample2	164			2.1503	50.7708	55.0371
Caaapa	WT_Sample2	164			0.9501
Caaapp	WT_Sample2	164			0.9501	0.7999	0.956
Daaaa	WT_Sample2	164			0.5367
Daaap	WT_Sample2	164			0.5367
Dpppa	WT_Sample2	164			1.1599	1.2833	0.6396
Dpppp	WT_Sample2	164			1.1599	2.4393	4.0823
Eplaa	WT_Sample2	164			1.1173	2.1896	1.2242
Eplap	WT_Sample2	164			1.1173	1.2872	10.706
Epraa	WT_Sample2	164			0.8613	0.7877	0.9029
Eprap	WT_Sample2	164			0.8613
ABalappappa	WT_Sample2	165			0.4652
ABalappappp	WT_Sample2	165			0.4652
ABarappapap	WT_Sample2	165			0.6613		0.5611
ABarpaapaa	WT_Sample2	165			0.7236
ABarpaapap	WT_Sample2	165			0.7236		0.8685
ABplaapaapa	WT_Sample2	165			0.6824
ABplaapaapp	WT_Sample2	165			0.6824	0.7755	0.8363
ABprpappapp	WT_Sample2	165			0.71		0.5682
Caaaaa	WT_Sample2	165			0.6282	1.0297	0.8054
Caaaap	WT_Sample2	165			0.6282	3.7379	4.2663
Caaapp	WT_Sample2	165			0.5573	0.791
Cpaaaa	WT_Sample2	165			0.5923	0.7672
Cpaaap	WT_Sample2	165			0.5923		1.7176
Cpaapp	WT_Sample2	165			0.7388		0.5157
Daaaa	WT_Sample2	165			0.6034
Daaap	WT_Sample2	165			0.6034
Ealpa	WT_Sample2	165			0.9735
Ealpp	WT_Sample2	165			0.9735	3.044	2.1886
Eplpa	WT_Sample2	165			0.4754		0.9439
Eplpp	WT_Sample2	165			0.4754
Eprpa	WT_Sample2	165			0.4619
Eprpp	WT_Sample2	165			0.4619
ABalappappa	WT_Sample2	166			0.5872
ABalappappp	WT_Sample2	166			0.5872		0.6824
ABarappapap	WT_Sample2	166			0.5161
ABarpapppa	WT_Sample2	166			0.6354
ABarppppaa	WT_Sample2	166			0.5819
ABplppaappa	WT_Sample2	166			0.4686
ABprpappapa	WT_Sample2	166			0.6323
ABprpappapp	WT_Sample2	166			0.6323		0.6653
ABprppppapa	WT_Sample2	166			0.4758		0.506
ABprppppapp	WT_Sample2	166			0.4758
Caaaaa	WT_Sample2	166			0.8806
Caaaap	WT_Sample2	166			0.8806	0.9101	0.5284
Caaapp	WT_Sample2	166			0.9569		0.9472
Cpaapp	WT_Sample2	166			0.9489		0.9341
Daaaa	WT_Sample2	166			0.861
Daaap	WT_Sample2	166			0.861
Eplaa	WT_Sample2	166			1.3494	3.9719	3.0871
Eplap	WT_Sample2	166			1.3494		0.4997
Eplpp	WT_Sample2	166			0.5026
Eprpa	WT_Sample2	166			0.4888
Eprpp	WT_Sample2	166			0.4888
ABalappappa	WT_Sample2	167			0.6665
ABalpapapaa	WT_Sample2	167			0.579
ABalpapapap	WT_Sample2	167			0.579		0.7641
ABarapapapa	WT_Sample2	167			0.5346
ABarapapapp	WT_Sample2	167			0.5346		0.6771
ABarappaaaa	WT_Sample2	167			0.521
ABarappaaap	WT_Sample2	167			0.521					1
ABarappapap	WT_Sample2	167			0.4795
ABarpapaaaa	WT_Sample2	167			0.4675
ABarpapaaap	WT_Sample2	167			0.4675					1
ABprpaaappa	WT_Sample2	167			0.4908
ABprpaaappp	WT_Sample2	167			0.4908
ABprpappapa	WT_Sample2	167			0.5228
ABprpappapp	WT_Sample2	167			0.5228		0.5402
Caaaap	WT_Sample2	167			0.9434
Caaapa	WT_Sample2	167			0.8163
Caaapp	WT_Sample2	167			0.8163		0.6761
Cpaaaa	WT_Sample2	167			0.9171	0.8245	0.8397
Cpaaap	WT_Sample2	167			0.9171
Cpaapa	WT_Sample2	167			0.7357	4.3242	3.6718
Cpaapp	WT_Sample2	167			0.7357		0.9418
Daaaa	WT_Sample2	167			0.674
Daaap	WT_Sample2	167			0.674
Dpppa	WT_Sample2	167			1.1243
Dpppp	WT_Sample2	167			1.1243	4.5799	4.3349
Ealpa	WT_Sample2	167			1.0808
Ealpp	WT_Sample2	167			1.0808	3.259	2.3849
Eplaa	WT_Sample2	167			0.9058	3.906	0.8848
Eplap	WT_Sample2	167			0.9058		0.604
Epraa	WT_Sample2	167			0.9318	1.022	0.9214
Eprap	WT_Sample2	167			0.9318		0.7758
MSaaappp	WT_Sample2	167			0.4573
ABalappappa	WT_Sample2	168			0.6291
ABalpapapaa	WT_Sample2	168			0.488
ABalpapapap	WT_Sample2	168			0.488		0.6628
ABarappaaaa	WT_Sample2	168			0.508
ABarappaaap	WT_Sample2	168			0.508					1
ABarappapaa	WT_Sample2	168			0.5264
ABarappapap	WT_Sample2	168			0.5264		0.4903
ABarapppapp	WT_Sample2	168			0.5343		0.965
ABplpappaaa	WT_Sample2	168			0.5196
ABplpappaap	WT_Sample2	168			0.5196
ABprpappapa	WT_Sample2	168			0.5272
ABprpappapp	WT_Sample2	168			0.5272
Caaaaa	WT_Sample2	168			0.9114
Caaaap	WT_Sample2	168			0.9114	57.9555
Cpaaaa	WT_Sample2	168			0.7296
Cpaaap	WT_Sample2	168			0.7296
Cpaapp	WT_Sample2	168			0.927		0.8869
Daaaa	WT_Sample2	168			0.6844
Daaap	WT_Sample2	168			0.6844
Dapaa	WT_Sample2	168			0.4946
Dapap	WT_Sample2	168			0.4946
Dappa	WT_Sample2	168			0.5336
Dappp	WT_Sample2	168			0.5336	7.7328	3.0971
Eplaa	WT_Sample2	168			1.3107	1.5336	3.0212
Eplap	WT_Sample2	168			1.3107		0.5181
Eprpa	WT_Sample2	168			0.4868
Eprpp	WT_Sample2	168			0.4868
MSaaappp	WT_Sample2	168			0.472
ABalaaapprl	WT_Sample2	169			0.4694
ABalaaapprr	WT_Sample2	169			0.4694
ABalpapapaa	WT_Sample2	169			0.4915
ABalpapapap	WT_Sample2	169			0.4915		0.5954
ABaraaaaaaa	WT_Sample2	169			0.4901
ABaraaaaaap	WT_Sample2	169			0.4901
ABarappaaaa	WT_Sample2	169			0.5384
ABarappaaap	WT_Sample2	169			0.5384					1
ABarappapaa	WT_Sample2	169			0.5031		0.5855
ABarappapap	WT_Sample2	169			0.5031		0.5348
ABarpapppa	WT_Sample2	169			0.6038	0.782
ABprpappapa	WT_Sample2	169			0.5233
ABprpappapp	WT_Sample2	169			0.5233
Caaaaa	WT_Sample2	169			2.2827
Caaaap	WT_Sample2	169			2.2827	23.1013	57.9649
Caaapp	WT_Sample2	169			0.9635		0.9534
Cpaaaa	WT_Sample2	169			0.7031
Cpaaap	WT_Sample2	169			0.7031
Cpaapa	WT_Sample2	169			0.7958
Cpaapp	WT_Sample2	169			0.7958		0.6451
Daaaa	WT_Sample2	169			0.7555
Daaap	WT_Sample2	169			0.7555
Dpppa	WT_Sample2	169			1.3062
Dpppp	WT_Sample2	169			1.3062	2.5503	5.0257
Eplaa	WT_Sample2	169			0.46	1.041	1.4876
Eplap	WT_Sample2	169			0.46
Epraa	WT_Sample2	169			0.9001		0.9301
Eprap	WT_Sample2	169			0.9001
Eprpa	WT_Sample2	169			0.4781
Eprpp	WT_Sample2	169			0.4781
ABalpaapppa	WT_Sample2	170			0.6048
ABalpaapppp	WT_Sample2	170			0.6048		0.5268
ABalpapaaaa	WT_Sample2	170			0.7091
[truncated: 3,781 more rows]

## Sheet: WT_Sample3
Cell identity c	Embryo sample j	Time point T	Segmentation failure (1) or not (empty)	Quality failure (value) or not (empty)						Manually annotated apoptotic cell (1) or not (empty)
				V (μm3)	CPR	VIR	VVR	SR	FRL
Z3	WT_Sample3	129		3.9774		0.9361	0.9785
Z3	WT_Sample3	140		3.3651	0.5601		0.9818
Z3	WT_Sample3	141		3.5925	0.5003	1.0291	0.9805
Ealaa	WT_Sample3	176		3.8666	0.5254		0.9819
Earpp	WT_Sample3	173		3.2368	0.4822		0.9782
Eplaa	WT_Sample3	168		3.0093	0.5351	1.0409	0.9842
Eplaa	WT_Sample3	171		3.9891	0.9606		0.9791
Eplaa	WT_Sample3	172		3.4525	0.521		0.9819
Eplaa	WT_Sample3	173		2.951	0.5165		0.9846
Eplaa	WT_Sample3	174		3.1726	0.5306		0.9834
Eplaa	WT_Sample3	175		4.2924	0.5273		0.9775
Eplaa	WT_Sample3	176		3.1843	0.5165		0.9833
Eplaa	WT_Sample3	177		3.6975	0.5362		0.9806
Eplpp	WT_Sample3	160		2.117		0.9075	0.9883
Eprpa	WT_Sample3	161		3.0326		1.0395	0.9782
Caaaa	WT_Sample3	81		4.479	0.6641		0.9154
Caaaa	WT_Sample3	83		3.0501	0.9473	1.0495	0.9424
Caaaa	WT_Sample3	87		2.6069	0.6148		0.9508
Caaaa	WT_Sample3	89		3.54	0.9733		0.9331
Caaaa	WT_Sample3	90		3.9191	0.9271		0.926
Cpaap	WT_Sample3	79		4.3273	0.5182		0.9717
Cpaap	WT_Sample3	90		4.2865		0.7193	0.9719
ABprpppap	WT_Sample3	131		2.397			0.9643	1
MSpaapp	WT_Sample3	105		2.6477						1
MSpaapp	WT_Sample3	106		2.0529						1
MSpaapp	WT_Sample3	107		3.68						1
MSpaapp	WT_Sample3	108		2.4144						1
MSpaapp	WT_Sample3	109		2.1462						1
MSpaapp	WT_Sample3	110		3.5459						1
MSpaapp	WT_Sample3	111		2.5428						1
MSpaapp	WT_Sample3	112		2.1578						1
MSpaapp	WT_Sample3	113		2.1403						1
MSpaapp	WT_Sample3	114		2.2453						1
MSpaapp	WT_Sample3	115		2.1403						1
MSpaapp	WT_Sample3	116		2.2686						1
MSpaapp	WT_Sample3	117		2.5194						1
MSpaapp	WT_Sample3	118		2.5428						1
MSpaapp	WT_Sample3	119		2.5311						1
MSpaapp	WT_Sample3	120		2.1228						1
MSpaapp	WT_Sample3	121		2.257						1
MSpaapp	WT_Sample3	122		2.1753						1
MSpaapp	WT_Sample3	123		2.1812						1
MSpaapp	WT_Sample3	124		2.327						1
MSpaapp	WT_Sample3	125		2.2103						1
MSpaapp	WT_Sample3	126		2.3911		0.9818				1
MSpaapp	WT_Sample3	128		3.7033						1
MSpaapp	WT_Sample3	129		2.1578						1
MSpaapp	WT_Sample3	130		2.6069						1
MSpaapp	WT_Sample3	131		4.4265						1
MSpaapp	WT_Sample3	132		3.6858		1.8195				1
MSpaapp	WT_Sample3	134		2.5661						1
MSpaapp	WT_Sample3	135		2.117		5.2399				1
Caaaaa	WT_Sample3	110		4.4673			0.8616
Caaaaa	WT_Sample3	113		4.2165		2.2123	0.8694
Caaaaa	WT_Sample3	167		2.741	10.3358		0.9151
Caaaaa	WT_Sample3	170		4.0474	0.8643		0.8746
Caaaaa	WT_Sample3	171		2.362	0.8088	0.7536	0.9268
Caaaaa	WT_Sample3	174		2.6011	0.894		0.9194
Caaaaa	WT_Sample3	175		3.2834	0.8839		0.8983
Caaaaa	WT_Sample3	176		3.505	0.8611		0.8914
Caaaaa	WT_Sample3	177		2.3736	0.8989		0.9265
Caaaaa	WT_Sample3	178		3.6917	0.8362		0.8856
Caaaaa	WT_Sample3	179		2.8402	0.8966		0.912
Caaaaa	WT_Sample3	180		3.8958	0.8624		0.8793
Caaaaa	WT_Sample3	183		3.2892	0.8178		0.8981
Caaaaa	WT_Sample3	184		3.8899	8.6178		0.8795
Caaaaa	WT_Sample3	185		2.6244	0.8484		0.9187
Caaaap	WT_Sample3	118		4.374	0.5424		0.4898
Caaaap	WT_Sample3	147		4.0707			0.5252
Caaaap	WT_Sample3	148		4.0241			0.5306
Caaaap	WT_Sample3	149		3.6625			0.5728
Caaaap	WT_Sample3	152		2.846			0.668
Caaaap	WT_Sample3	153		3.8958		1.1517	0.5456
Caaaap	WT_Sample3	155		4.2107			0.5088
Caaaap	WT_Sample3	158		3.9016			0.5449
Caaaap	WT_Sample3	160		3.6975			0.5687
Caaaap	WT_Sample3	162		2.776	0.4909		0.6762
Caaaap	WT_Sample3	163		3.4642	0.7942		0.5959
Caaaap	WT_Sample3	164		3.8141	0.8352		0.5551
Caaaap	WT_Sample3	166		4.2865	0.8291	69.1844	0.5
Caaaap	WT_Sample3	168		2.9976	0.8277	48.5952	0.6503
Caaaap	WT_Sample3	170		3.1376	0.8643		0.634
Caaaap	WT_Sample3	172		3.5634			0.5844
Caaaap	WT_Sample3	173		3.0676	0.766		0.6422
Caaaap	WT_Sample3	174		3.0093	0.894		0.649
Caaaap	WT_Sample3	175		2.8635	0.8839		0.666
Caaaap	WT_Sample3	176		3.8491	0.8611		0.551
Caaaap	WT_Sample3	177		2.9802	0.8989		0.6524
Caaaap	WT_Sample3	179		2.6361	0.8966		0.6925
Caaaap	WT_Sample3	180		3.3884	0.8624		0.6048
Caaaap	WT_Sample3	181		3.575	0.8091		0.583
Caaaap	WT_Sample3	182		4.0999			0.5218
Caaapa	WT_Sample3	127		2.4203	0.5353	4.9996	0.8159
Caaapa	WT_Sample3	148		4.0299		0.9858	0.6934
Caaapa	WT_Sample3	156		4.0941	0.5869		0.6886
Caaapa	WT_Sample3	160		4.3507	0.5684		0.669
Caaapa	WT_Sample3	161		2.7294	0.7651		0.7924
Caaapa	WT_Sample3	162		3.5867	0.5539		0.7272
Caaapa	WT_Sample3	165		3.126	0.7992		0.7622
Caaapa	WT_Sample3	166		4.2924	0.7491		0.6735
Caaapa	WT_Sample3	168		2.5894	0.7653		0.803
Caaapa	WT_Sample3	169		4.2165	0.7143		0.6792
Caaapa	WT_Sample3	170		3.2426	0.8758		0.7533
Caaapa	WT_Sample3	171		3.4001	0.7326		0.7413
Caaapa	WT_Sample3	172		4.4148	0.7479		0.6642
Caaapa	WT_Sample3	173		4.3448	0.7894		0.6695
Caaapa	WT_Sample3	174		2.7527	0.7973		0.7906
Caaapa	WT_Sample3	175		3.8316	0.7874		0.7085
Caaapa	WT_Sample3	176		2.4786	0.8788		0.8114
Caaapa	WT_Sample3	177		3.1434	0.8105		0.7609
Caaapa	WT_Sample3	178		2.4669	0.857		0.8123
Caaapa	WT_Sample3	179		2.6477	0.8555		0.7986
Caaapa	WT_Sample3	180		2.741	0.8821		0.7915
Caaapa	WT_Sample3	181		3.0851	0.8843		0.7653
Caaapa	WT_Sample3	182		3.9599	0.8761		0.6988
Caaapa	WT_Sample3	183		3.126	0.8618		0.7622
Caaapa	WT_Sample3	184		3.6683	0.807		0.7209
Caaapa	WT_Sample3	185		2.5661	0.8798		0.8048
Caaapp	WT_Sample3	131		4.2399	0.6087	1.0406	0.9499
Caaapp	WT_Sample3	150		4.4382	0.8396		0.9476
Caapap	WT_Sample3	172		4.3448						1
Caapap	WT_Sample3	174		4.479						1
Caapap	WT_Sample3	176		4.3565						1
Caapap	WT_Sample3	177		2.8635			0.5411			1
Caapap	WT_Sample3	178		3.1843			0.4897			1
Caapap	WT_Sample3	179		4.1757						1
Caapap	WT_Sample3	180		4.1116						1
Caapap	WT_Sample3	181		3.3884						1
Caapap	WT_Sample3	182		3.8783						1
Caapap	WT_Sample3	184		2.9277			0.5308			1
Cpaaaa	WT_Sample3	158		2.7177	0.9521		0.9683
Cpaaaa	WT_Sample3	159		2.5253			0.9706
Cpaaaa	WT_Sample3	160		2.4903	0.949		0.971
Cpaaap	WT_Sample3	162		2.9102	0.5124		0.9332
Cpaaap	WT_Sample3	166		3.2718	0.9586		0.9249
Cpaaap	WT_Sample3	168		2.4903	0.9661		0.9428
Cpaaap	WT_Sample3	169		3.9716	0.9249		0.9088
Cpaaap	WT_Sample3	170		4.4498	0.9489	1.1309	0.8979
Cpaaap	WT_Sample3	174		3.9249	0.9405		0.9099
Cpaaap	WT_Sample3	175		3.1726	0.9574		0.9272
Cpaaap	WT_Sample3	176		2.8169	0.9432		0.9354
Cpaaap	WT_Sample3	177		4.0416	0.7913		0.9072
Cpaaap	WT_Sample3	178		2.6477	0.7868	8.0179	0.9392
Cpaapa	WT_Sample3	109		2.5602			0.6349
Cpaapa	WT_Sample3	110		3.5575		5.3064	0.4927
Cpaapa	WT_Sample3	113		4.2282	0.4583	10.6603
Cpaapa	WT_Sample3	128		2.776		15.0769	0.6042
Cpaapa	WT_Sample3	148		4.0182	0.5028
Cpaapa	WT_Sample3	149		3.8783	0.4558
Cpaapa	WT_Sample3	150		3.2776	0.6159		0.5326
Cpaapa	WT_Sample3	151		2.7935	0.7633		0.6017
Cpaapa	WT_Sample3	152		3.2251	0.8505		0.5401
Cpaapa	WT_Sample3	153		3.7966	0.7503
Cpaapa	WT_Sample3	154		3.8433	0.8111
Cpaapa	WT_Sample3	155		2.8868	0.8357		0.5884
Cpaapa	WT_Sample3	156		3.3826	0.842		0.5177
Cpaapa	WT_Sample3	158		3.1026	0.8862	32.6545	0.5576
Cpaapa	WT_Sample3	166		4.1874	0.9251
Cpaapa	WT_Sample3	168		4.164	0.941
Cpaapa	WT_Sample3	171		4.0008	0.927
Cpaapa	WT_Sample3	174		3.5634	0.9492		0.4919
Cpaapa	WT_Sample3	175		3.8783	0.9545
Cpaapa	WT_Sample3	176		3.785	0.95
Cpaapa	WT_Sample3	177		4.0882	0.9511
Cpaapa	WT_Sample3	179		3.4817	0.9588		0.5035
Cpaapa	WT_Sample3	182		2.8693	0.9594		0.5909
Cpaapa	WT_Sample3	183		2.8577	0.9606		0.5925
Cpaapa	WT_Sample3	184		2.3386	0.963		0.6665
Cpaapa	WT_Sample3	185		2.9976	0.9469		0.5726
Cpaapp	WT_Sample3	173		4.2282	0.6618		0.9452
Cpaapp	WT_Sample3	174		4.199	0.9492		0.9455
Cpaapp	WT_Sample3	175		3.0676	0.9545		0.9602
Cpaapp	WT_Sample3	176		3.8491	0.95		0.9501
Cpaapp	WT_Sample3	177		3.3767	0.9511		0.9562
Cpaapp	WT_Sample3	179		2.811	0.9588		0.9635
Cpaapp	WT_Sample3	180		2.6302	0.944		0.9659
Cpaapp	WT_Sample3	181		2.9277	0.9357		0.962
Cpaapp	WT_Sample3	182		3.3359	0.9594		0.9567
Cpaapp	WT_Sample3	183		3.1609	0.9606		0.959
Cpaapp	WT_Sample3	184		3.3126	0.963		0.957
Cpapaa	WT_Sample3	174		2.2745	0.9294		0.9762
Cpapaa	WT_Sample3	176		4.3098	0.9438		0.9549
Cpapaa	WT_Sample3	181		3.1201	0.9498		0.9673
Cpappd	WT_Sample3	176		2.4844	0.8366		0.9737
Dpppp	WT_Sample3	183		3.1959	0.7173		0.946
Dpppp	WT_Sample3	184		4.4207	0.642		0.9254
Dpppp	WT_Sample3	185		3.9308	0.6336		0.9336
ABalaapapa	WT_Sample3	129		4.0707						1
ABalaapapa	WT_Sample3	130		2.3211						1
ABalaapapa	WT_Sample3	131		2.3561						1
ABalaapapa	WT_Sample3	132		2.3036						1
ABalaapapa	WT_Sample3	133		2.187						1
ABalaapapa	WT_Sample3	134		2.5019						1
ABalaapapa	WT_Sample3	135		2.7702		0.7062				1
ABalaapapa	WT_Sample3	138		3.2134						1
ABalaapapa	WT_Sample3	139		2.4553						1
ABalaapapa	WT_Sample3	140		2.4553						1
ABalaapapa	WT_Sample3	141		2.4144						1
ABalaapapa	WT_Sample3	142		2.1287						1
ABalaapapa	WT_Sample3	143		2.5894						1
ABalaapapa	WT_Sample3	144		2.741						1
ABalaapapa	WT_Sample3	145		2.4436						1
ABalaapapa	WT_Sample3	146		2.3445						1
ABalaapapa	WT_Sample3	147		2.3445						1
ABalaappaa	WT_Sample3	131		3.9658						1
ABalaappaa	WT_Sample3	132		4.1057						1
ABalaappaa	WT_Sample3	133		3.5342						1
ABalaappaa	WT_Sample3	134		3.6158						1
ABalaappaa	WT_Sample3	135		2.9976			0.5095			1
ABalaappaa	WT_Sample3	136		2.5952			0.5754			1
ABalaappaa	WT_Sample3	137		2.7469			0.5506			1
ABalaappaa	WT_Sample3	139		3.2193						1
ABalaappaa	WT_Sample3	140		3.4642						1
ABalaappaa	WT_Sample3	141		4.0999						1
ABalaappaa	WT_Sample3	143		3.8433						1
ABalaappaa	WT_Sample3	144		3.8841						1
ABalapapaa	WT_Sample3	128		3.645						1
ABalapapaa	WT_Sample3	129		4.3565						1
ABalapapaa	WT_Sample3	130		4.0474						1
ABalapapaa	WT_Sample3	131		3.1726						1
ABalapapaa	WT_Sample3	132		3.5459						1
ABalapapaa	WT_Sample3	133		2.8752			0.4907			1
ABalapapaa	WT_Sample3	134		2.5136			0.5548			1
ABalapapaa	WT_Sample3	135		2.6536			0.53			1
ABalapapaa	WT_Sample3	136		2.8169			0.501			1
ABalapapaa	WT_Sample3	137		3.2076						1
ABalapapaa	WT_Sample3	139		4.409						1
ABalapapaa	WT_Sample3	146		3.8724						1
ABalapapaa	WT_Sample3	147		3.8025						1
ABalapapaa	WT_Sample3	148		4.1874						1
ABalapapaa	WT_Sample3	149		3.3126						1
ABalapapaa	WT_Sample3	150		2.9102			0.4845			1
ABalapapaa	WT_Sample3	151		3.3534						1
ABalapapaa	WT_Sample3	152		3.9249						1
ABalapapaa	WT_Sample3	154		3.715						1
ABalapapaa	WT_Sample3	155		4.3098						1
ABalapapaa	WT_Sample3	156		3.2659						1
ABalapapaa	WT_Sample3	157		4.1291						1
ABalapapaa	WT_Sample3	159		3.1901						1
ABalapapaa	WT_Sample3	160		2.5777			0.5434			1
ABalapapaa	WT_Sample3	161		3.6042						1
ABalapapaa	WT_Sample3	162		3.4642						1
ABalapapaa	WT_Sample3	163		2.706			0.5207			1
ABalapapaa	WT_Sample3	164		2.8927			0.4876			1
ABalapapaa	WT_Sample3	165		2.2395			0.6033			1
ABalapapaa	WT_Sample3	166		2.5894			0.5413			1
ABalapapaa	WT_Sample3	167		2.1695		0.9948	0.6157			1
ABalapapaa	WT_Sample3	184		3.5867						1
ABalapapaa	WT_Sample3	185		3.8375						1
ABalappaaa	WT_Sample3	131		3.1551						1
ABalappaaa	WT_Sample3	132		2.7294						1
ABalappaaa	WT_Sample3	133		2.7002						1
ABalappaaa	WT_Sample3	134		2.7702						1
ABalappaaa	WT_Sample3	135		3.0326						1
ABalappaaa	WT_Sample3	136		2.8635						1
ABalappaaa	WT_Sample3	137		2.6652	0.4606					1
ABalappaaa	WT_Sample3	138		2.7994						1
ABalappaaa	WT_Sample3	139		2.4436	0.5016					1
ABalappaaa	WT_Sample3	140		2.7527	0.4905					1
ABalappaaa	WT_Sample3	141		3.61						1
ABalappaaa	WT_Sample3	142		2.8285						1
ABalappaaa	WT_Sample3	143		2.5486						1
ABalappaaa	WT_Sample3	144		3.1784						1
ABalappaaa	WT_Sample3	145		2.3445						1
ABalappaaa	WT_Sample3	146		2.4611						1
ABalappaaa	WT_Sample3	147		2.257						1
ABalappaaa	WT_Sample3	148		2.1637						1
ABalappaaa	WT_Sample3	149		2.4261						1
ABalappaaa	WT_Sample3	150		2.3036						1
ABalappaaa	WT_Sample3	151		2.3795						1
ABalappaaa	WT_Sample3	152		2.4028						1
ABalappaaa	WT_Sample3	153		2.4203						1
ABalappaaa	WT_Sample3	154		2.2337						1
ABalappaaa	WT_Sample3	155		2.2278						1
ABalappaaa	WT_Sample3	156		2.222						1
ABalappaaa	WT_Sample3	157		2.2103	0.48					1
ABalpaaaaa	WT_Sample3	148		2.1695	0.551	1.0602	0.9126
ABalppaaaa	WT_Sample3	138		3.3242						1
ABalppaaaa	WT_Sample3	139		3.0618						1
ABalppaaaa	WT_Sample3	140		2.951			0.4953			1
ABalppaaaa	WT_Sample3	141		3.5808						1
ABalppaaaa	WT_Sample3	142		3.7033						1
ABalppaaaa	WT_Sample3	143		3.3301						1
ABalppaaaa	WT_Sample3	144		3.5517						1
ABalppaaaa	WT_Sample3	145		3.021			0.4833			1
ABalppaaaa	WT_Sample3	146		3.0268						1
ABalppaaaa	WT_Sample3	147		2.4028			0.589			1
ABalppaaaa	WT_Sample3	148		2.5777			0.5591			1
ABalppaaaa	WT_Sample3	149		2.811			0.5192			1
ABalppaaaa	WT_Sample3	150		2.8344			0.5152			1
ABalppaaaa	WT_Sample3	151		2.6477			0.5471			1
ABalppaaaa	WT_Sample3	152		2.7119			0.5362			1
ABalppaaaa	WT_Sample3	153		2.5836			0.5581			1
ABalppaaaa	WT_Sample3	154		2.4378			0.583			1
ABalppaaaa	WT_Sample3	155		2.292			0.608			1
ABalppaaaa	WT_Sample3	156		2.2512			0.615			1
ABalppaapa	WT_Sample3	131		4.1232	0.6046					1
ABalppaapa	WT_Sample3	132		3.2309	0.6894					1
ABalppaapa	WT_Sample3	133		3.1551	0.7569					1
ABalppaapa	WT_Sample3	134		3.5634	0.6192					1
ABalppaapa	WT_Sample3	135		3.0443	0.5039	2.0107				1
ABalppaapa	WT_Sample3	137		3.3826	0.511					1
ABalppaapa	WT_Sample3	138		2.986						1
ABalppaapa	WT_Sample3	141		4.1349						1
ABalppaapa	WT_Sample3	142		3.9249	0.4903					1
ABalppaapa	WT_Sample3	143		3.2368	0.5382					1
ABalppaapa	WT_Sample3	144		3.6858	0.4962					1
ABalppaapa	WT_Sample3	146		2.4436	0.486		0.5535			1
ABalppaapa	WT_Sample3	147		2.8344	0.4876					1
ABalppaapa	WT_Sample3	148		2.187	0.6043		0.6004			1
ABaraaaapp	WT_Sample3	141		3.3301			0.524			1
ABaraaaapp	WT_Sample3	142		2.9043			0.5848			1
ABaraaaapp	WT_Sample3	160		3.7616						1
ABaraaaapp	WT_Sample3	161		4.2165						1
ABaraaaapp	WT_Sample3	163		3.6683						1
ABaraaaapp	WT_Sample3	164		3.9424						1
ABaraaaapp	WT_Sample3	167		3.4992			0.4998			1
ABaraaaapp	WT_Sample3	168		3.75						1
ABaraappaa	WT_Sample3	119		2.2512		0.8739	0.9344
ABaraappaa	WT_Sample3	150		2.6069		1.0147	0.9241
ABarapaapp	WT_Sample3	135		1.9246	0.633	0.9532	0.9663
ABarappaap	WT_Sample3	150		3.9774			0.8202
ABarappaap	WT_Sample3	155		3.6217	0.4995		0.8363
ABarappaap	WT_Sample3	156		3.75	0.4968	0.8152	0.8305
ABarappapp	WT_Sample3	146		2.5253	0.5059		0.9206
ABarappapp	WT_Sample3	147		3.6333	0.5338	0.7154	0.8858
ABarapppaa	WT_Sample3	145		2.3853	0.461	0.7576	0.9147
ABarpaaaap	WT_Sample3	131		2.9277		0.6818	0.9114
ABarpaaapp	WT_Sample3	153		4.479						1
ABarpaaapp	WT_Sample3	154		4.4498						1
ABarpaaapp	WT_Sample3	155		3.9016						1
ABarpaaapp	WT_Sample3	158		4.4207						1
ABarpaaapp	WT_Sample3	159		4.1057						1
ABarpaaapp	WT_Sample3	160		3.8141						1
ABarpaaapp	WT_Sample3	161		3.5225						1
ABarpaaapp	WT_Sample3	162		3.5459						1
ABarpaaapp	WT_Sample3	163		3.3009						1
ABarpaaapp	WT_Sample3	164		3.8491						1
ABarpaaapp	WT_Sample3	165		4.4906						1
ABarpaaapp	WT_Sample3	166		3.9599						1
ABarpaaapp	WT_Sample3	167		3.7033						1
ABarpaaapp	WT_Sample3	168		3.1085			0.5065			1
ABarpaaapp	WT_Sample3	169		3.056			0.5148			1
ABarpaaapp	WT_Sample3	170		3.6858						1
ABarpaaapp	WT_Sample3	171		3.6625						1
ABarpaaapp	WT_Sample3	172		3.0618			0.5139			1
ABarpaaapp	WT_Sample3	173		2.741			0.5648			1
ABarpaaapp	WT_Sample3	174		2.6361			0.5815			1
ABarpaaapp	WT_Sample3	175		2.6361			0.5815			1
ABarpaaapp	WT_Sample3	176		2.7935			0.5565			1
ABarpaaapp	WT_Sample3	177		2.6652			0.5769			1
ABarpaaapp	WT_Sample3	178		2.5952			0.588			1
ABarpaaapp	WT_Sample3	179		2.397			0.6194			1
ABarpaaapp	WT_Sample3	180		2.6652			0.5769			1
ABarpaaapp	WT_Sample3	181		2.6069			0.5861			1
ABarpaapap	WT_Sample3	172		2.9627	0.7347		0.9683
ABarpaapap	WT_Sample3	175		2.8227	0.7628		0.9698
ABarpaappa	WT_Sample3	146		3.2368			0.9537
ABarpaappa	WT_Sample3	153		3.7383	0.615	1.3864	0.9466
ABarpaappa	WT_Sample3	174		2.5894	0.7511		0.963
ABarpaappa	WT_Sample3	175		2.5019	0.7343	0.781	0.9642
ABarpappaa	WT_Sample3	177		2.6594	0.527		0.7913
ABarpappaa	WT_Sample3	178		2.9218	0.5387		0.7707
ABarpappaa	WT_Sample3	179		4.1874	0.4594		0.6714
ABarpappap	WT_Sample3	138		2.1462	0.7963		0.9515
ABarpapppp	WT_Sample3	136		3.47	0.5801	1.0366	0.9449
ABarpapppp	WT_Sample3	147		2.117		0.9732	0.9664
ABarppaapa	WT_Sample3	151		4.3273	0.6296	0.7304	0.9404
ABarppaapa	WT_Sample3	181		3.0501	0.6066	0.9574	0.958
ABarpppaap	WT_Sample3	184		4.1524	0.7832		0.9358
ABarpppapa	WT_Sample3	171		4.1582	0.7429		0.9178
ABarpppapa	WT_Sample3	173		4.3157	0.8077		0.9147
ABarpppapa	WT_Sample3	174		3.3592	0.7689		0.9336
ABarpppapa	WT_Sample3	175		3.1434	0.4824		0.9379
ABarpppapa	WT_Sample3	176		2.6536	0.5267		0.9476
ABarpppapa	WT_Sample3	177		2.5136	0.5932		0.9503
ABarpppapa	WT_Sample3	179		3.3359	0.5533		0.9341
ABplaaaapa	WT_Sample3	163		2.5078		1.3815	0.9435
ABplaaaapp	WT_Sample3	171		2.4844		0.8386	0.9424
ABplaaapaa	WT_Sample3	133		3.8141			0.693
ABplaaappa	WT_Sample3	151		3.9891			0.9129
ABplaaappa	WT_Sample3	153		4.0182	0.552	0.762	0.9123
ABplaaappa	WT_Sample3	157		3.9774		1.3637	0.9132
ABplaappaa	WT_Sample3	178		4.4207			0.8032
ABplaappaa	WT_Sample3	181		3.9133			0.8258
ABplaappaa	WT_Sample3	182		2.7527	0.5796		0.8775
ABplaappaa	WT_Sample3	184		3.8783	0.754		0.8274
ABplaapppa	WT_Sample3	185		3.0501	0.5226		0.9621
ABplappapa	WT_Sample3	177		3.1201	0.5418		0.9392
ABplappapa	WT_Sample3	182		3.6917	0.6815		0.9281
ABplappppp	WT_Sample3	132		2.3153	0.5626	1.0048	0.9284
ABplpappap	WT_Sample3	120		4.4032						1
ABplpappap	WT_Sample3	121		4.3332						1
ABplpappap	WT_Sample3	122		3.7558						1
ABplpappap	WT_Sample3	123		4.1174						1
ABplpappap	WT_Sample3	124		3.9249						1
ABplpappap	WT_Sample3	125		3.2018						1
ABplpappap	WT_Sample3	126		3.2892						1
ABplpappap	WT_Sample3	127		3.2718						1
ABplpappap	WT_Sample3	128		3.6917						1
ABplpappap	WT_Sample3	132		4.0882						1
ABplpappap	WT_Sample3	135		3.7791						1
ABplpappap	WT_Sample3	137		4.3857						1
ABplpappap	WT_Sample3	138		4.3448						1
ABplpappap	WT_Sample3	139		3.2193						1
ABplpappap	WT_Sample3	140		3.75						1
ABplpappap	WT_Sample3	141		2.4144						1
ABplpappap	WT_Sample3	142		2.327						1
ABplpappap	WT_Sample3	143		2.1987			0.4926			1
ABplpappap	WT_Sample3	144		2.4144						1
ABplpappap	WT_Sample3	145		2.3095						1
ABplpappap	WT_Sample3	146		2.2803						1
ABplpappap	WT_Sample3	147		2.1578			0.502			1
ABplpappap	WT_Sample3	148		2.1812			0.4966			1
ABplpappap	WT_Sample3	149		2.0704			0.5222			1
ABplpappap	WT_Sample3	150		2.0645			0.5236			1
ABplpappap	WT_Sample3	151		4.2574						1
ABplpappap	WT_Sample3	152		2.0879			0.5182			1
ABplpappap	WT_Sample3	153		2.2628						1
ABplpappap	WT_Sample3	155		2.047			0.5276			1
ABplpappap	WT_Sample3	156		4.1407						1
ABplpappap	WT_Sample3	157		2.1812			0.4966			1
ABplpappap	WT_Sample3	158		2.2103		3.5168	0.4899			1
ABplppaaap	WT_Sample3	133		3.9541						1
ABplppaaap	WT_Sample3	134		4.0591						1
ABplppaaap	WT_Sample3	135		3.3884						1
ABplppaaap	WT_Sample3	136		4.1174						1
ABplppaaap	WT_Sample3	137		3.855						1
ABplppaaap	WT_Sample3	138		3.6625						1
ABplppaaap	WT_Sample3	139		3.68						1
ABplppaaap	WT_Sample3	140		3.0501						1
ABplppaaap	WT_Sample3	141		2.8344						1
ABplppaaap	WT_Sample3	142		3.1143						1
ABplppaaap	WT_Sample3	143		3.1668						1
ABplppaaap	WT_Sample3	144		3.3884						1
ABplppaaap	WT_Sample3	145		2.5253						1
ABplppaaap	WT_Sample3	146		2.7935						1
ABplppaaap	WT_Sample3	147		2.6769						1
ABplppaaap	WT_Sample3	148		2.916						1
ABplppaaap	WT_Sample3	149		2.5369						1
ABplppaaap	WT_Sample3	150		2.5019						1
ABplppaaap	WT_Sample3	151		2.4728						1
ABplppaaap	WT_Sample3	152		2.3795						1
ABplppaaap	WT_Sample3	153		2.4028						1
ABplppaaap	WT_Sample3	154		2.2803						1
ABplppaaap	WT_Sample3	155		2.6711						1
ABplppaaap	WT_Sample3	156		2.2628						1
ABplppaaap	WT_Sample3	157		2.846						1
ABplppaaap	WT_Sample3	158		3.7675						1
ABplppaaap	WT_Sample3	159		2.3561						1
ABplppaaap	WT_Sample3	160		2.2453						1
ABplppaaap	WT_Sample3	161		2.2745						1
ABplppaaap	WT_Sample3	162		2.257						1
ABplppaaap	WT_Sample3	163		2.2045						1
ABplppaaap	WT_Sample3	164		2.4669						1
ABplppaaap	WT_Sample3	165		2.292						1
ABplppaaap	WT_Sample3	166		2.4261						1
ABplppaaap	WT_Sample3	167		2.3795						1
ABplppaaap	WT_Sample3	168		2.3095						1
ABplppaaap	WT_Sample3	169		2.2395						1
ABplppaaap	WT_Sample3	170		2.2162						1
ABplppaaap	WT_Sample3	171		2.3386						1
ABplppaaap	WT_Sample3	172		2.5486						1
ABplpppapp	WT_Sample3	125		3.8608			0.4994			1
ABplpppapp	WT_Sample3	126		3.4759						1
ABplpppapp	WT_Sample3	127		3.4176						1
ABplpppapp	WT_Sample3	128		3.0443		1.0872				1
ABplpppapp	WT_Sample3	130		2.7119						1
ABplpppapp	WT_Sample3	131		2.4378						1
ABplpppapp	WT_Sample3	133		2.2278						1
ABplpppapp	WT_Sample3	134		2.1578						1
ABplpppapp	WT_Sample3	135		2.4086						1
ABplpppapp	WT_Sample3	136		2.2861		1.624				1
ABplpppapp	WT_Sample3	139		2.2278						1
ABplpppapp	WT_Sample3	140		2.3036						1
ABplpppapp	WT_Sample3	141		2.1578						1
ABplpppapp	WT_Sample3	142		2.397						1
ABplpppapp	WT_Sample3	143		2.1812						1
ABplpppapp	WT_Sample3	144		2.1753						1
ABplpppapp	WT_Sample3	145		2.2337						1
ABplpppapp	WT_Sample3	146		2.3911						1
ABplpppapp	WT_Sample3	147		2.397						1
ABplpppapp	WT_Sample3	148		2.3328						1
ABplpppapp	WT_Sample3	149		2.1928						1
ABplpppapp	WT_Sample3	150		3.0968						1
ABplpppapp	WT_Sample3	151		2.2453						1
ABplpppapp	WT_Sample3	152		2.2337						1
ABplpppapp	WT_Sample3	153		2.1637						1
ABplpppapp	WT_Sample3	154		2.3386						1
ABplpppapp	WT_Sample3	155		2.222						1
ABplpppapp	WT_Sample3	156		2.3503						1
ABplpppapp	WT_Sample3	157		2.257						1
ABpraappaa	WT_Sample3	180		3.8025	0.4628		0.7333
ABpraappaa	WT_Sample3	181		4.0182			0.7182
ABpraappaa	WT_Sample3	184		3.8433			0.7305
ABpraappaa	WT_Sample3	185		4.2282	0.4843		0.7035
ABprapaaaa	WT_Sample3	116		2.8577		0.8834	0.9134
ABprappppa	WT_Sample3	150		3.1201	0.5468		0.8615
ABprpappap	WT_Sample3	138		2.4144	0.5649	0.9395	0.9341
ABprppaaap	WT_Sample3	128		4.339			0.5246			1
ABprppaaap	WT_Sample3	129		2.7994						1
ABprppaaap	WT_Sample3	130		2.4319						1
ABprppaaap	WT_Sample3	131		2.2045						1
ABprppaaap	WT_Sample3	132		2.1112						1
ABprppaaap	WT_Sample3	133		2.1987						1
ABprppaaap	WT_Sample3	134		2.1695						1
ABprppaaap	WT_Sample3	135		2.2278						1
ABprppaaap	WT_Sample3	136		2.292						1
ABprppaaap	WT_Sample3	137		3.4292						1
ABprppaaap	WT_Sample3	138		2.2337						1
ABprppaaap	WT_Sample3	139		2.152						1
ABprppaaap	WT_Sample3	140		2.5078						1
ABprppaaap	WT_Sample3	141		2.1112						1
ABprppaaap	WT_Sample3	142		2.1637						1
ABprppaaap	WT_Sample3	143		2.257						1
ABprppaaap	WT_Sample3	144		2.5428						1
ABprppaaap	WT_Sample3	145		2.187						1
ABprppaaap	WT_Sample3	146		2.152						1
ABprppaaap	WT_Sample3	147		2.4086						1
ABprppaaap	WT_Sample3	148		2.2337						1
ABprppaaap	WT_Sample3	149		3.8958						1
ABprppaaap	WT_Sample3	150		2.5836						1
ABprppaaap	WT_Sample3	151		2.8635		7.9057				1
ABprppaaap	WT_Sample3	154		2.8285		1.1434				1
ABprppaaap	WT_Sample3	157		2.4903						1
ABprppaaap	WT_Sample3	158		2.327						1
ABprppaaap	WT_Sample3	159		2.6011						1
ABprppaaap	WT_Sample3	160		3.9074						1
ABprpppapp	WT_Sample3	126		3.8958						1
ABprpppapp	WT_Sample3	127		3.4117						1
ABprpppapp	WT_Sample3	128		2.9043						1
ABprpppapp	WT_Sample3	129		3.68						1
ABprpppapp	WT_Sample3	134		3.785						1
ABprpppapp	WT_Sample3	135		4.3098						1
ABprpppapp	WT_Sample3	137		3.6217						1
ABprpppapp	WT_Sample3	138		3.0268						1
ABprpppapp	WT_Sample3	139		3.1551						1
ABprpppapp	WT_Sample3	140		2.5602						1
ABprpppapp	WT_Sample3	141		3.091						1
ABprpppapp	WT_Sample3	142		2.3911						1
ABprpppapp	WT_Sample3	143		2.6477						1
ABprpppapp	WT_Sample3	144		2.9685						1
ABprpppapp	WT_Sample3	145		2.5194						1
ABprpppapp	WT_Sample3	146		2.9802						1
ABprpppapp	WT_Sample3	147		2.7935						1
ABprpppapp	WT_Sample3	148		2.5952						1
ABprpppapp	WT_Sample3	149		2.6711						1
ABprpppapp	WT_Sample3	150		2.9393						1
ABprpppapp	WT_Sample3	151		2.3853						1
ABprpppapp	WT_Sample3	152		2.5369						1
ABprpppapp	WT_Sample3	153		2.6302						1
ABprpppapp	WT_Sample3	154		2.9393						1
ABprpppapp	WT_Sample3	155		2.5428						1
ABprpppapp	WT_Sample3	156		2.4261						1
ABprpppapp	WT_Sample3	157		2.3095						1
ABprpppapp	WT_Sample3	158		2.2103						1
ABprpppapp	WT_Sample3	159		2.2395						1
MSaaappa	WT_Sample3	149		2.4261			0.7396			1
MSaaappa	WT_Sample3	150		3.2134			0.6551			1
MSaaappa	WT_Sample3	151		3.4525			0.6294			1
MSaaappa	WT_Sample3	152		2.5019			0.7315			1
MSaaappa	WT_Sample3	153		2.916			0.687			1
MSaaappa	WT_Sample3	154		2.4961			0.7321			1
MSaaappa	WT_Sample3	155		2.3503			0.7477			1
MSaaappa	WT_Sample3	156		2.2745			0.7559			1
MSaaappa	WT_Sample3	157		2.2045			0.7634			1
MSaaappa	WT_Sample3	158		3.7558		20.7255	0.5969			1
MSaaappa	WT_Sample3	161		2.1928			0.7646			1
MSaaappa	WT_Sample3	163		2.117			0.7728			1
MSaaappa	WT_Sample3	164		2.1112		21.0829	0.7734			1
MSapaapa	WT_Sample3	147		3.2484						1
MSapaapa	WT_Sample3	148		2.397						1
MSapaapa	WT_Sample3	149		2.3911						1
MSapaapa	WT_Sample3	150		2.6127						1
MSapaapa	WT_Sample3	151		2.7935						1
MSapaapa	WT_Sample3	152		2.152						1
MSapaapa	WT_Sample3	153		2.2803						1
MSapaapa	WT_Sample3	154		2.1578						1
MSapaapa	WT_Sample3	155		2.2162						1
MSapaapa	WT_Sample3	156		2.362						1
MSapaapa	WT_Sample3	157		2.4903						1
MSapaapa	WT_Sample3	158		2.8927						1
MSapaapa	WT_Sample3	159		3.3476						1
MSapaapa	WT_Sample3	160		2.741						1
MSapaapa	WT_Sample3	161		2.5894						1
MSapaapa	WT_Sample3	162		2.4144						1
MSapaapa	WT_Sample3	163		2.2978						1
MSapaapa	WT_Sample3	164		2.2861						1
MSappapa	WT_Sample3	161		3.5575			0.5349			1
MSappapa	WT_Sample3	162		3.5808			0.5318			1
MSappapa	WT_Sample3	164		2.846			0.6279			1
MSappapa	WT_Sample3	165		2.5428			0.6676			1
MSappapa	WT_Sample3	166		2.6186			0.6576			1
MSappapa	WT_Sample3	167		3.8433			0.4975			1
MSappapa	WT_Sample3	168		2.6069			0.6592			1
MSppaapa	WT_Sample3	148		4.0591						1
MSppaapa	WT_Sample3	149		2.5894		2.7742	0.6482			1
MSppaapa	WT_Sample3	151		2.397			0.6743			1
MSppaapa	WT_Sample3	152		2.4786			0.6632			1
MSppaapa	WT_Sample3	153		2.397			0.6743			1
MSppaapa	WT_Sample3	154		2.3095			0.6862			1
MSppaapa	WT_Sample3	155		2.1812			0.7036			1
MSpppaaa	WT_Sample3	173		2.9335	0.7002	0.9707	0.9027			1
MSpppaaa	WT_Sample3	179		4.0241	0.5737	0.8023	0.8665			1
MSpppapa	WT_Sample3	145		3.8724						1
MSpppapa	WT_Sample3	146		3.3359						1
MSpppapa	WT_Sample3	147		3.0268						1
MSpppapa	WT_Sample3	148		2.5019						1
MSpppapa	WT_Sample3	149		2.9627						1
MSpppapa	WT_Sample3	150		2.3678						1
MSpppapa	WT_Sample3	151		2.2803						1
MSpppapa	WT_Sample3	152		2.2628						1
MSpppapa	WT_Sample3	153		2.6361						1
MSpppapa	WT_Sample3	154		2.2395						1
MSpppapa	WT_Sample3	155		2.1987						1
MSpppapa	WT_Sample3	156		2.222						1
MSpppapa	WT_Sample3	157		2.4086						1
MSpppapa	WT_Sample3	158		2.4611						1
MSpppapa	WT_Sample3	159		2.1753						1
MSpppapa	WT_Sample3	160		2.152						1
MSpppapa	WT_Sample3	161		2.2337						1
MSpppapa	WT_Sample3	162		2.6302						1
MSpppapa	WT_Sample3	163		2.4553						1
MSpppppp	WT_Sample3	149		4.2632			0.8636
Cpppaap	WT_Sample3	180		2.6302	0.4801		0.8843
Cpppaap	WT_Sample3	183		3.2659	0.5828		0.8563
Cpppaap	WT_Sample3	184		2.9685	0.7076		0.8694
Cpppaap	WT_Sample3	185		3.3476	0.6132		0.8527
ABalaaaalpa	WT_Sample3	181		4.3332						1
ABalaaaarla	WT_Sample3	170		3.1434			0.5078			1
ABalaaaarla	WT_Sample3	172		2.8344		0.7863	0.5562			1
ABalaaaarla	WT_Sample3	180		4.0999						1
ABalaaaarla	WT_Sample3	185		2.4436			0.6174			1
ABalaaaarra	WT_Sample3	170		4.1407						1
ABalaaaarra	WT_Sample3	171		4.0182		0.9765				1
ABalaaaarra	WT_Sample3	173		4.3332						1
ABalaaaarra	WT_Sample3	176		2.4844			0.5444			1
ABalaaaarra	WT_Sample3	185		3.8841						1
ABalaaapalr	WT_Sample3	169		3.1959	0.5559	0.787	0.7335
ABalaaapalr	WT_Sample3	182		2.706			0.7743
ABalaapaapa	WT_Sample3	176		4.3098						1
ABalaapaapa	WT_Sample3	179		3.5284	0.6046		0.4838			1
ABalaapaapa	WT_Sample3	180		3.2543	0.5608		0.5239			1
ABalaapaapa	WT_Sample3	182		3.435	0.5077		0.4974			1
ABalaapaapa	WT_Sample3	183		4.3623	0.5323					1
ABalaapppap	WT_Sample3	177		4.2632			0.6806			1
ABalaapppap	WT_Sample3	178		4.0707			0.695			1
ABalaapppap	WT_Sample3	179		3.6625			0.7256			1
ABalaapppap	WT_Sample3	182		3.5109			0.7369			1
ABalaapppap	WT_Sample3	184		4.0532			0.6963			1
ABalaapppap	WT_Sample3	185		4.4382			0.6675			1
ABalapaapap	WT_Sample3	184		4.3857			0.7198			1
ABalapaapap	WT_Sample3	185		3.5867	0.4654		0.7709			1
ABalapapppa	WT_Sample3	185		2.327	0.6084		0.8875
ABalapppapp	WT_Sample3	182		3.5284		0.904	0.7152
ABalapppppp	WT_Sample3	172		2.3736	0.5464	1.0454	0.8742
ABalpaaaapp	WT_Sample3	179		3.3592			0.7111			1
ABalpaaaapp	WT_Sample3	180		2.8985			0.7507			1
ABalpaaaapp	WT_Sample3	181		2.5719	0.5895		0.7788			1
ABalpaaaapp	WT_Sample3	182		2.4319			0.7908			1
ABalpaaaapp	WT_Sample3	183		2.3153			0.8009			1
ABalpaaaapp	WT_Sample3	184		2.4611	0.6905		0.7883			1
ABalpaaaapp	WT_Sample3	185		2.2803			0.8039			1
ABalpaaapap	WT_Sample3	178		4.2165			0.633			1
ABalpaaapap	WT_Sample3	180		2.6827			0.7665			1
ABalpaaapap	WT_Sample3	181		3.2251			0.7193			1
ABalpaaapap	WT_Sample3	182		2.397			0.7914			1
ABalpaaapap	WT_Sample3	183		2.6886			0.766			1
ABalpaaapap	WT_Sample3	184		2.4144			0.7898			1
ABalpaaapap	WT_Sample3	185		2.6302			0.7711			1
ABalpaaappa	WT_Sample3	175		4.2574	0.4792		0.7355			1
ABalpaaappa	WT_Sample3	179		3.6158			0.7753			1
ABalpaaappa	WT_Sample3	180		2.6711	0.4693		0.834			1
ABalpaaappa	WT_Sample3	181		2.5719	0.5142		0.8402			1
ABalpaaappa	WT_Sample3	182		2.6536			0.8351			1
ABalpaaappa	WT_Sample3	183		2.6127			0.8377			1
ABalpaaappa	WT_Sample3	184		2.2453			0.8605			1
ABalpaaappa	WT_Sample3	185		2.7235			0.8308			1
ABalpaaappp	WT_Sample3	177		2.6186	0.7575	0.7643	0.7963
ABalpapaaaa	WT_Sample3	163		2.9335	0.7966		0.7036
ABalpapaaaa	WT_Sample3	164		3.7033	0.6379		0.6258
ABalpapaaaa	WT_Sample3	165		3.126	0.742		0.6841
ABalpapaaaa	WT_Sample3	166		3.7383	0.715		0.6223
ABalpapaaaa	WT_Sample3	167		4.0941	0.7832		0.5863
ABalpapaaaa	WT_Sample3	168		4.0941	0.7535	1.2658	0.5863
ABalpapaaap	WT_Sample3	163		3.1726	0.7966		0.5023
ABalpapaaap	WT_Sample3	167		2.4144	0.7832		0.6212
ABalpapaaap	WT_Sample3	168		3.3067	0.7535	1.3294
ABalpapaaap	WT_Sample3	175		4.0707	0.5334	0.9579
ABalpapaaap	WT_Sample3	177		3.6917	0.4625
ABalpapaaap	WT_Sample3	181		3.0385	0.603		0.5233
ABalpapaaap	WT_Sample3	182		3.8083
ABalpapaaap	WT_Sample3	183		2.4494	0.5175		0.6157
ABalpapaaap	WT_Sample3	184		2.5136	0.4557		0.6057
ABalpapaaap	WT_Sample3	185		2.9335	0.5602		0.5398
ABalpapaapp	WT_Sample3	172		3.4759		2.4555				1
ABalpapaapp	WT_Sample3	176		4.5198						1
ABalpapaapp	WT_Sample3	179		4.0766						1
ABalpapaapp	WT_Sample3	180		2.3853			0.5814			1
ABalpapaapp	WT_Sample3	181		2.5602			0.5507			1
ABalpapaapp	WT_Sample3	182		2.951						1
ABalpapaapp	WT_Sample3	183		2.7994			0.5087			1
ABalpapaapp	WT_Sample3	184		2.6652			0.5322			1
ABalpapaapp	WT_Sample3	185		3.3651						1
ABalpapapaa	WT_Sample3	170		3.5808			0.6799
ABalpapapaa	WT_Sample3	171		3.4176			0.6945
ABalpapapaa	WT_Sample3	172		4.269			0.6184
ABalpapappa	WT_Sample3	183		3.7733			0.6142			1
ABalpapappa	WT_Sample3	184		2.8285			0.7108			1
ABalpapappa	WT_Sample3	185		2.8635			0.7072			1
ABalpapappp	WT_Sample3	176		3.126		0.8181	0.7894
ABalpappaaa	WT_Sample3	168		4.4382						1
ABalpappaaa	WT_Sample3	169		3.0326						1
ABalpappaaa	WT_Sample3	170		2.8868						1
ABalpappaaa	WT_Sample3	171		2.846						1
ABalpappaaa	WT_Sample3	172		2.5836						1
ABalpappaaa	WT_Sample3	173		2.6769						1
ABalpappaaa	WT_Sample3	174		2.8169						1
ABalpappaaa	WT_Sample3	175		2.3853						1
ABalpappaaa	WT_Sample3	176		2.7644						1
ABalpappaaa	WT_Sample3	177		2.8344						1
ABalpappaaa	WT_Sample3	178		2.4494						1
ABalpappaaa	WT_Sample3	179		2.2045			0.5033			1
ABalpappaaa	WT_Sample3	180		2.3153						1
ABalpappaaa	WT_Sample3	181		2.4028						1
ABalpappaaa	WT_Sample3	182		2.2803			0.4862			1
ABalpappaaa	WT_Sample3	183		3.0501						1
ABalpappaaa	WT_Sample3	184		2.5602						1
ABalpappaaa	WT_Sample3	185		2.7585						1
ABalpappapp	WT_Sample3	178		3.3009	0.5907	1.0506	0.8938
ABalpapppap	WT_Sample3	185		3.5517			0.7314			1
ABalppaappa	WT_Sample3	177		3.645			0.7017			1
ABalppapapp	WT_Sample3	165		4.4382	0.618		0.5337
ABalppapapp	WT_Sample3	169		3.2134	0.7206		0.6624
ABalppapapp	WT_Sample3	173		3.6508	0.5337		0.6164
ABalppapapp	WT_Sample3	175		4.1407	0.4778		0.565
ABalppapapp	WT_Sample3	176		3.2018			0.6636
ABalppapapp	WT_Sample3	177		4.199			0.5588
ABalppapapp	WT_Sample3	178		4.0008			0.5797
ABalppapapp	WT_Sample3	179		3.6567			0.6158
ABalppapapp	WT_Sample3	180		3.575		0.6991	0.6244
ABalpppaaap	WT_Sample3	163		4.2107			0.4946
ABalpppappa	WT_Sample3	155		4.4265						1
ABalpppappa	WT_Sample3	160		3.2076						1
ABalpppappa	WT_Sample3	161		2.257			0.4901			1
ABalpppappa	WT_Sample3	162		2.4844						1
ABalpppappa	WT_Sample3	163		2.706						1
ABalpppappa	WT_Sample3	164		2.3386						1
ABalpppappa	WT_Sample3	165		2.916		1.253				1
ABalpppappa	WT_Sample3	171		2.4203						1
ABalpppappa	WT_Sample3	172		2.2512			0.4914			1
ABalpppappa	WT_Sample3	173		3.4875						1
ABalpppappa	WT_Sample3	174		3.1493						1
ABalpppappa	WT_Sample3	175		2.8868						1
ABalpppappa	WT_Sample3	176		2.3445						1
ABalpppappa	WT_Sample3	177		2.5661						1
ABalpppappa	WT_Sample3	178		2.6827						1
ABalpppappa	WT_Sample3	179		2.6361						1
ABalpppappa	WT_Sample3	180		3.435						1
ABalpppappa	WT_Sample3	181		3.4875						1
ABalpppappa	WT_Sample3	182		2.8635		4.7879				1
ABalpppappa	WT_Sample3	185		3.1026						1
ABalppppaav	WT_Sample3	166		2.5311						1
ABalppppaav	WT_Sample3	167		2.5369						1
ABalppppaav	WT_Sample3	168		2.5661						1
ABalppppaav	WT_Sample3	169		2.3853						1
ABalppppaav	WT_Sample3	170		2.4961						1
ABalppppaav	WT_Sample3	171		2.5078						1
ABalppppaav	WT_Sample3	172		2.4319						1
ABalppppaav	WT_Sample3	173		2.3853						1
ABalppppaav	WT_Sample3	174		2.5777						1
ABalppppaav	WT_Sample3	175		2.6769						1
ABalppppaav	WT_Sample3	176		3.1026						1
ABalppppaav	WT_Sample3	177		2.5253						1
ABalppppaav	WT_Sample3	178		2.6419						1
ABalppppaav	WT_Sample3	179		3.2368						1
ABalppppaav	WT_Sample3	180		2.776						1
ABalppppaav	WT_Sample3	181		2.327						1
ABalppppaav	WT_Sample3	182		2.7994						1
ABalppppapp	WT_Sample3	165		3.54			0.5547			1
ABalppppapp	WT_Sample3	166		3.4525			0.5657			1
ABalppppapp	WT_Sample3	167		2.9277			0.6317			1
ABalppppapp	WT_Sample3	168		2.3678			0.7021			1
ABalppppapp	WT_Sample3	169		3.2076			0.5965			1
ABalppppapp	WT_Sample3	170		3.1026			0.6097			1
ABalppppapp	WT_Sample3	171		2.6536			0.6662			1
ABalppppapp	WT_Sample3	172		2.6536			0.6662			1
ABalppppapp	WT_Sample3	173		2.2686			0.7146			1
ABalppppapp	WT_Sample3	174		2.3561			0.7036			1
ABalppppapp	WT_Sample3	175		2.6127			0.6713			1
ABalppppapp	WT_Sample3	176		2.811			0.6464			1
ABalppppapp	WT_Sample3	177		2.4436			0.6926			1
ABaraaaapaa	WT_Sample3	185		4.2982			0.6695			1
ABaraaapapa	WT_Sample3	146		2.1578	0.5639	1.0505	0.9596
ABarapaaapp	WT_Sample3	178		2.7527			0.7261			1
ABarapaaapp	WT_Sample3	179		2.6127			0.74			1
ABarapaaapp	WT_Sample3	180		2.5661			0.7446			1
ABarapaaapp	WT_Sample3	181		2.397			0.7615			1
ABarapaaapp	WT_Sample3	182		2.7877			0.7226			1
ABarapaaapp	WT_Sample3	183		2.8577			0.7156			1
ABarapaaapp	WT_Sample3	184		2.7469			0.7266			1
ABarapaaapp	WT_Sample3	185		2.7235			0.729			1
ABarapaapap	WT_Sample3	181		3.6217			0.6486			1
ABarapaapap	WT_Sample3	182		2.9627			0.7125			1
ABarapaapap	WT_Sample3	183		3.2543			0.6842			1
ABarapaapap	WT_Sample3	184		2.6536			0.7425			1
ABarapaapap	WT_Sample3	185		2.2745			0.7793			1
ABarapaappp	WT_Sample3	183		4.4265			0.5843
ABarapapaaa	WT_Sample3	167		4.0591						1
ABarapapaaa	WT_Sample3	168		3.3476						1
ABarapapaaa	WT_Sample3	169		3.0968						1
ABarapapaaa	WT_Sample3	170		2.9743						1
ABarapapaaa	WT_Sample3	171		3.1026						1
ABarapapaaa	WT_Sample3	172		2.1987	0.5384					1
ABarapapaaa	WT_Sample3	173		2.292						1
ABarapapaaa	WT_Sample3	174		3.4934	0.5142					1
ABarapapaaa	WT_Sample3	175		2.2745						1
ABarapapaaa	WT_Sample3	176		2.4611						1
ABarapapaaa	WT_Sample3	177		2.3153						1
ABarapapaaa	WT_Sample3	178		2.1578						1
ABarapapaaa	WT_Sample3	179		2.3445						1
ABarapapaaa	WT_Sample3	180		2.222						1
ABarapapaaa	WT_Sample3	181		2.3386						1
ABarapapaaa	WT_Sample3	182		2.3211						1
ABarapapaaa	WT_Sample3	183		2.4378						1
ABarapapaaa	WT_Sample3	184		2.2686						1
ABarapapaaa	WT_Sample3	185		2.362						1
ABarapapppp	WT_Sample3	173		2.1287	0.6279	0.9774	0.9581
ABarapapppp	WT_Sample3	180		3.2892		0.7456	0.9353
ABarappaapa	WT_Sample3	172		4.5256	0.508		0.6178
ABarappaapp	WT_Sample3	163		4.1874	0.5096					1
ABarappaapp	WT_Sample3	167		4.164	0.5972					1
ABarappaapp	WT_Sample3	168		3.8841	0.5584					1
ABarappaapp	WT_Sample3	170		3.6975	0.502					1
ABarappaapp	WT_Sample3	177		4.199		1.2948				1
ABarappaapp	WT_Sample3	182		4.3098						1
ABarappaapp	WT_Sample3	183		2.881						1
ABarappaapp	WT_Sample3	184		2.6769			0.5043			1
ABarappaapp	WT_Sample3	185		2.8169						1
ABarappapaa	WT_Sample3	168		3.5225	0.7835		0.5424
ABarappapaa	WT_Sample3	170		4.4032	0.5792
ABarappapaa	WT_Sample3	171		3.2426	0.795		0.5788
ABarappapaa	WT_Sample3	172		2.811	0.6215		0.6348
ABarappapaa	WT_Sample3	183		3.2543			0.5773
ABarappapaa	WT_Sample3	185		4.0241
ABarappapap	WT_Sample3	168		4.0882	0.7835		0.8018
ABarappapap	WT_Sample3	171		3.9658	0.795		0.8077
ABarappapap	WT_Sample3	173		2.9102	0.7149	0.7794	0.8589
ABarapppapa	WT_Sample3	167		2.3911	0.7382		0.7857
ABarapppapa	WT_Sample3	168		3.0326	0.6571		0.7282
ABarapppapa	WT_Sample3	170		2.9627	0.7158		0.7344
ABarapppppp	WT_Sample3	161		3.8141		0.6917	0.7196
ABarapppppp	WT_Sample3	183		2.2803		1.741	0.8323
ABarpaaaaal	WT_Sample3	179		2.5661	0.5495	0.8581	0.8124
ABarpaaaapp	WT_Sample3	185		4.0066	0.5948		0.7878
ABarpaaapap	WT_Sample3	176		2.7235		0.9476	0.8425
ABarpapaapa	WT_Sample3	158		4.5256						1
ABarpapaapa	WT_Sample3	159		3.6742						1
ABarpapaapa	WT_Sample3	160		3.1376						1
ABarpapaapa	WT_Sample3	161		2.2978			0.6056			1
ABarpapaapa	WT_Sample3	162		2.1987			0.6226			1
ABarpapaapa	WT_Sample3	163		2.1987			0.6226			1
ABarpapaapa	WT_Sample3	164		2.3211		0.8879	0.6016			1
ABarpapaapa	WT_Sample3	166		2.4144			0.5856			1
ABarpapaapa	WT_Sample3	167		2.5136			0.5686			1
ABarpapaapa	WT_Sample3	168		2.4436			0.5806			1
ABarpapaapa	WT_Sample3	169		3.4992						1
ABarpapaapa	WT_Sample3	171		2.846			0.5115			1
ABarpapaapa	WT_Sample3	172		2.6069			0.5526			1
ABplaaaaapa	WT_Sample3	166		4.4906						1
ABplaaaaapa	WT_Sample3	167		4.2982						1
ABplaaaaapa	WT_Sample3	169		3.9366						1
ABplaaaaapa	WT_Sample3	170		4.3682						1
ABplaaaaapa	WT_Sample3	171		3.4934			0.5045			1
ABplaaaaapa	WT_Sample3	172		4.2982						1
ABplaaaaapa	WT_Sample3	174		2.362			0.665			1
ABplaaaaapa	WT_Sample3	175		2.7119			0.6154			1
ABplaapaaap	WT_Sample3	184		3.1376	0.5784		0.7972
ABplaapaaap	WT_Sample3	185		3.6333	0.6284		0.7652
ABplaapappp	WT_Sample3	160		2.3153	0.6527	1.3503	0.9422
ABplpaaaaaa	WT_Sample3	163		2.8635			0.8189
ABplpaaaaaa	WT_Sample3	164		2.5253			0.8403
ABplpappaap	WT_Sample3	154		2.9802	0.7885	0.8714	0.9638
ABplppaapaa	WT_Sample3	176		3.0618			0.7088			1
ABplppaapaa	WT_Sample3	177		2.7702			0.7366			1
ABplppaapaa	WT_Sample3	178		3.8316			0.6356			1
ABplppaapaa	WT_Sample3	179		2.2861			0.7826			1
ABplppaapaa	WT_Sample3	180		2.2745			0.7837			1
ABplppaapaa	WT_Sample3	181		2.2686			0.7842			1
ABplppaapaa	WT_Sample3	182		2.2686			0.7842			1
ABplppaapaa	WT_Sample3	183		2.3386			0.7776			1
ABplppaapaa	WT_Sample3	184		2.3853			0.7732			1
ABplppaapaa	WT_Sample3	185		2.2103			0.7898			1
ABplpppaaap	WT_Sample3	174		4.4556	0.4633		0.5171
ABplpppaapp	WT_Sample3	157		4.2165
ABplpppaapp	WT_Sample3	175		4.2049
ABplpppaapp	WT_Sample3	176		3.7558
ABplpppaapp	WT_Sample3	177		4.0649
ABplpppaapp	WT_Sample3	178		3.9833
ABplpppaapp	WT_Sample3	179		2.9218			0.5217
ABplpppaapp	WT_Sample3	180		4.479
ABplpppapaa	WT_Sample3	181		3.2601	0.8271		0.669
ABplpppapaa	WT_Sample3	182		4.1815	0.8326		0.5755
ABplpppapap	WT_Sample3	180		4.4032	0.7712		0.8713
ABplpppapap	WT_Sample3	182		3.3767	0.8326		0.9013
ABplpppapap	WT_Sample3	183		4.0882	0.7691		0.8805
ABpraaaappa	WT_Sample3	153		4.4207		0.749	0.498			1
ABpraaaappa	WT_Sample3	155		3.9366						1
ABpraaaappa	WT_Sample3	156		2.9743						1
ABpraaaappa	WT_Sample3	157		2.4319						1
ABpraaaappa	WT_Sample3	158		3.056						1
ABpraaaappa	WT_Sample3	159		3.505						1
ABpraaaappa	WT_Sample3	161		3.4234						1
ABpraaaappa	WT_Sample3	162		3.8375						1
ABpraaaappa	WT_Sample3	163		2.2686						1
ABpraaaappa	WT_Sample3	164		2.1812						1
ABpraaaappa	WT_Sample3	165		2.4961						1
ABpraaaappa	WT_Sample3	166		2.1987						1
ABpraaaappa	WT_Sample3	167		2.2745						1
ABpraaaappa	WT_Sample3	168		2.9277		1.3676				1
ABpraaaappa	WT_Sample3	170		2.2453						1
ABpraaaappa	WT_Sample3	171		2.3503						1
ABpraaaappa	WT_Sample3	172		2.2278						1
ABpraaaappa	WT_Sample3	173		2.5602						1
ABpraaaappa	WT_Sample3	174		2.6477						1
ABpraaaappa	WT_Sample3	175		2.6652						1
ABpraaaappa	WT_Sample3	176		2.1987						1
ABpraaaappa	WT_Sample3	177		2.4728						1
ABpraaaappa	WT_Sample3	178		2.8402						1
ABpraaaappa	WT_Sample3	179		2.4028		11.1087				1
ABpraaapaav	WT_Sample3	170		3.9308						1
ABpraaapaav	WT_Sample3	176		3.4117						1
ABpraaapaav	WT_Sample3	177		3.8608						1
ABpraaapaav	WT_Sample3	180		2.3386			0.6188			1
ABpraaapaav	WT_Sample3	181		2.4728			0.597			1
ABpraaapaav	WT_Sample3	182		2.4319			0.6036			1
ABpraaapaav	WT_Sample3	183		2.2512			0.6331			1
ABpraaapaav	WT_Sample3	184		4.4673						1
ABpraaapaav	WT_Sample3	185		2.3328			0.6198			1
ABpraaapapp	WT_Sample3	166		3.9833						1
ABpraaapapp	WT_Sample3	167		4.2282	0.6384		0.4918			1
ABpraaapapp	WT_Sample3	168		2.8344						1
ABpraaapapp	WT_Sample3	169		2.7994	0.6286					1
ABpraaapapp	WT_Sample3	170		2.6419						1
ABpraaapapp	WT_Sample3	171		2.7352						1
ABpraaapapp	WT_Sample3	172		2.6827						1
ABpraaapapp	WT_Sample3	173		2.5719						1
ABpraaapapp	WT_Sample3	174		2.9743	0.4656					1
ABpraaapapp	WT_Sample3	175		2.4961						1
ABpraaapapp	WT_Sample3	176		2.3678						1
ABpraaapapp	WT_Sample3	177		2.4144						1
ABpraaapapp	WT_Sample3	178		2.362						1
ABpraaapapp	WT_Sample3	179		3.0676						1
ABpraaapapp	WT_Sample3	180		2.4378						1
ABpraaapapp	WT_Sample3	181		2.5253						1
ABpraaapapp	WT_Sample3	182		2.5311						1
ABpraaapapp	WT_Sample3	183		2.7294						1
ABpraaapapp	WT_Sample3	184		2.2978						1
ABpraaapapp	WT_Sample3	185		2.292						1
ABpraapaaap	WT_Sample3	168		2.8344	0.4633		0.6432
ABpraapaaap	WT_Sample3	180		2.8518	0.5117		0.641
ABprapaaaaa	WT_Sample3	183		2.7177			0.6584			1
ABprapaaaaa	WT_Sample3	184		2.2512			0.717			1
ABprapaaaaa	WT_Sample3	185		2.1812			0.7258			1
ABprapaaapp	WT_Sample3	183		3.1201			0.7721
ABprapaaapp	WT_Sample3	184		3.47			0.7466
ABprapaaapp	WT_Sample3	185		3.4292			0.7496
ABprapapppa	WT_Sample3	174		2.3386			0.686			1
ABprapapppa	WT_Sample3	175		2.3211			0.6883			1
ABprapapppa	WT_Sample3	176		2.222			0.7016			1
ABprapapppa	WT_Sample3	177		2.4961			0.6648			1
ABprapapppa	WT_Sample3	178		2.8402			0.6186			1
ABprapapppa	WT_Sample3	179		2.3736			0.6813			1
ABprapapppa	WT_Sample3	180		2.5428			0.6586			1
ABprapapppa	WT_Sample3	181		2.327			0.6875			1
ABprapapppa	WT_Sample3	182		2.7119			0.6359			1
ABprapapppa	WT_Sample3	183		2.5602			0.6562			1
ABprapapppa	WT_Sample3	184		2.3795			0.6805			1
ABprapapppa	WT_Sample3	185		3.7033			0.5027			1
ABprapppapa	WT_Sample3	167		3.435						1
ABprapppapa	WT_Sample3	168		3.68						1
ABprapppapa	WT_Sample3	169		2.6769						1
ABprapppapa	WT_Sample3	170		2.4319						1
ABprapppapa	WT_Sample3	171		2.3853						1
ABprapppapa	WT_Sample3	172		2.3328						1
ABprapppapa	WT_Sample3	173		2.327						1
ABprapppapa	WT_Sample3	174		2.4436						1
ABprapppapa	WT_Sample3	175		2.2628						1
ABprapppapa	WT_Sample3	176		2.3795						1
ABprapppapa	WT_Sample3	177		2.5428						1
ABprapppapa	WT_Sample3	178		2.4203						1
ABprapppapa	WT_Sample3	179		2.4494						1
ABprapppapa	WT_Sample3	180		2.2861						1
ABprpaapapp	WT_Sample3	167		4.5198						1
ABprpappaaa	WT_Sample3	160		2.9335	0.4564		0.6514
ABprpappaaa	WT_Sample3	162		4.2224			0.4983
ABprpappaaa	WT_Sample3	164		3.4409			0.5911
ABprpappaaa	WT_Sample3	165		2.7352	0.4888		0.675
ABprpappaaa	WT_Sample3	166		3.0735	0.4555		0.6348
ABprpappaaa	WT_Sample3	167		4.3448			0.4837
ABprpappapa	WT_Sample3	180		2.1112		1.0775	0.8416
ABprpappapp	WT_Sample3	157		3.0618	0.7395		0.7813
ABprpappapp	WT_Sample3	158		4.2399	0.5541		0.6971
ABprpappapp	WT_Sample3	159		3.5517	0.7053		0.7462
ABprpappapp	WT_Sample3	160		2.6244	0.6083		0.8125
ABprpappapp	WT_Sample3	161		3.4584	0.6254		0.7529
ABprpappapp	WT_Sample3	162		2.7352	0.6819		0.8046
ABprpappapp	WT_Sample3	163		2.8285	0.6797		0.7979
ABprpappapp	WT_Sample3	164		4.1116	0.6886		0.7062
ABprppaapaa	WT_Sample3	175		4.0649			0.5614			1
ABprppaapaa	WT_Sample3	176		3.1026			0.6652			1
ABprppaapaa	WT_Sample3	177		2.3795			0.7432			1
ABprppaapaa	WT_Sample3	178		2.4669			0.7338			1
ABprppaapaa	WT_Sample3	179		2.257			0.7565			1
ABprppaapaa	WT_Sample3	180		2.3328			0.7483			1
ABprppaapaa	WT_Sample3	181		2.5253			0.7275			1
ABprppaapaa	WT_Sample3	182		2.4611			0.7344			1
ABprppaapaa	WT_Sample3	183		2.2803			0.7539			1
ABprppaapaa	WT_Sample3	184		2.4261			0.7382			1
ABprppaapaa	WT_Sample3	185		2.2978			0.752			1
ABprppappaa	WT_Sample3	171		4.2982		0.7136	0.7182
ABprppappap	WT_Sample3	183		3.5634		1.0881	0.7665
ABprpppaaap	WT_Sample3	173		2.6594	0.6687		0.73
ABprpppaaap	WT_Sample3	174		3.2543	0.6407		0.6696
ABprpppaaap	WT_Sample3	175		3.3709	0.6032		0.6578
ABprpppaaap	WT_Sample3	176		3.2368	0.4711		0.6714
ABprpppaaap	WT_Sample3	177		4.1349	0.4825		0.5802
ABprpppaaap	WT_Sample3	178		3.9366		1.0746	0.6004
ABprpppaapp	WT_Sample3	172		3.8666	0.4756		0.5206
ABprpppaapp	WT_Sample3	173		4.5081
ABprppppapp	WT_Sample3	148		2.9568	0.5589		0.8546
ABprppppppa	WT_Sample3	153		2.1578			0.803			1
MSaaaappa	WT_Sample3	160		2.7819		0.8234	0.8192			1
MSaaaappa	WT_Sample3	165		2.7177		0.9632	0.8234			1
MSaaaappa	WT_Sample3	181		3.2834			0.7867			1
MSaaaappa	WT_Sample3	182		3.0385			0.8026			1
MSaaaappa	WT_Sample3	183		4.0182			0.7389			1
MSaapappa	WT_Sample3	183		3.5517	0.5934	1.163	0.9206
MSpaaaaap	WT_Sample3	176		2.6827		1.013	0.6858			1
MSpaapaap	WT_Sample3	183		3.7033			0.7814			1
MSpapaaaa	WT_Sample3	170		3.2543		0.685	0.8965
Cpaaa	WT_Sample3	78			0.5418
Cpaap	WT_Sample3	78			0.5418		0.9677
Cpaaa	WT_Sample3	79			0.5182
Caaaa	WT_Sample3	80			0.5553		0.8662
Caaap	WT_Sample3	80			0.5553	0.7036	1.9254
Cpaaa	WT_Sample3	80			0.4768
Cpaap	WT_Sample3	80			0.4768		0.8139
Caaap	WT_Sample3	81			0.6641	1.876	1.2218
Caaaa	WT_Sample3	82			0.924		0.7656
Caaap	WT_Sample3	82			0.924		0.6542
Cpaaa	WT_Sample3	82			0.6799	0.8288	0.979
Cpaap	WT_Sample3	82			0.6799	0.8142
Caaap	WT_Sample3	83			0.9473	2.3063	0.6841
Cpaaa	WT_Sample3	83			0.5357
Cpaap	WT_Sample3	83			0.5357	1.1535	0.9268
Caaaa	WT_Sample3	84			0.4954
Caaap	WT_Sample3	84			0.4954		1.6222
Caaaa	WT_Sample3	85			0.5236	2.8787
Caaap	WT_Sample3	85			0.5236	2.2492	1.5869
Caaaa	WT_Sample3	86			0.5453	3.7224	2.7716
Caaap	WT_Sample3	86			0.5453	2.2456	0.6624
Caaap	WT_Sample3	87			0.6148	2.4169	1.5832
Caaaa	WT_Sample3	88			0.9648		0.8999
Caaap	WT_Sample3	88			0.9648		0.8337
Caaap	WT_Sample3	89			0.9733		0.8676
Cpapa	WT_Sample3	89			0.5244	0.7471	0.7976
Cpapp	WT_Sample3	89			0.5244
Caaap	WT_Sample3	90			0.9271		0.5582
Caaaa	WT_Sample3	91			0.9243		0.8647
Caaap	WT_Sample3	91			0.9243		0.584
Caaaa	WT_Sample3	92			0.8944	4.6168
Caaap	WT_Sample3	92			0.8944		0.7077
Caaaa	WT_Sample3	94			0.6482	1.7277	0.8448
Caaap	WT_Sample3	94			0.6482
Caaaa	WT_Sample3	95			0.7731	5.1295	0.8829
Caaap	WT_Sample3	95			0.7731	1.3274
Caaaa	WT_Sample3	97			0.7107	1.3684	0.5831
Caaap	WT_Sample3	97			0.7107
Caaaa	WT_Sample3	98			0.8364		0.7853
Caaap	WT_Sample3	98			0.8364
Caaaa	WT_Sample3	99			0.8628	4.4689	0.8393
Caaap	WT_Sample3	99			0.8628
Caaaa	WT_Sample3	101			0.4625	5.3431	0.7994
Caaap	WT_Sample3	101			0.4625		2.5076
Caaapa	WT_Sample3	105			1.104	0.7853	1.7671
Caaapp	WT_Sample3	105			1.104
Caaapa	WT_Sample3	106			1.0937		0.9818
Caaapp	WT_Sample3	106			1.0937		0.4849
Caaaaa	WT_Sample3	107			1.2974		1.4985
Caaaap	WT_Sample3	107			1.2974	3.9361	3.7803
Caaapa	WT_Sample3	107			0.8809		0.5674
Caaapp	WT_Sample3	107			0.8809
Caaaaa	WT_Sample3	108			1.9043	2.1559	1.4484
Caaaap	WT_Sample3	108			1.9043	1.2082	7.7163
Caaapa	WT_Sample3	108			0.6181
Caaapp	WT_Sample3	108			0.6181
Caaapa	WT_Sample3	109			0.5621
Caaapp	WT_Sample3	109			0.5621
Caaapa	WT_Sample3	110			0.5167
Caaapp	WT_Sample3	110			0.5167
Caaaaa	WT_Sample3	111			0.4585		0.8282
Caaaap	WT_Sample3	111			0.4585	2.6163	1.6973
Caaapa	WT_Sample3	111			0.5344
Caaapp	WT_Sample3	111			0.5344
Caaapa	WT_Sample3	112			0.6539	0.9002
Caaapp	WT_Sample3	112			0.6539
Cpaapa	WT_Sample3	112			0.6252	6.1655	5.7684
Cpaapp	WT_Sample3	112			0.6252	0.8913	0.8734
Caaapa	WT_Sample3	113			0.7322	5.6065	0.5404
Caaapp	WT_Sample3	113			0.7322
Cpaapp	WT_Sample3	113			0.4583
Caaaaa	WT_Sample3	114			2.0887		1.3429
Caaaap	WT_Sample3	114			2.0887	9.0946	9.2524
Caaapa	WT_Sample3	114			1.6862		5.0661
Caaapp	WT_Sample3	114			1.6862
Caaaaa	WT_Sample3	115			0.7536		1.5686
Caaaap	WT_Sample3	115			0.7536	1.9871
Caaapa	WT_Sample3	115			1.9172	5.8731	5.6806
Caaapp	WT_Sample3	115			1.9172
Caaaaa	WT_Sample3	116			0.7325	0.7162	1.0063
Caaaap	WT_Sample3	116			0.7325		2.1449
Caaapa	WT_Sample3	116			0.7146	2.7591
Caaapp	WT_Sample3	116			0.7146
Caaaaa	WT_Sample3	117			1.2672		1.7225
Caaaap	WT_Sample3	117			1.2672	3.2401	2.7503
Caaapa	WT_Sample3	117			1.2667	0.8678	2.5665
Caaapp	WT_Sample3	117			1.2667
Caaaaa	WT_Sample3	118			0.5424		1.3942
Caaapa	WT_Sample3	118			1.0536	3.1819	1.6988
Caaapp	WT_Sample3	118			1.0536
Cpaaaa	WT_Sample3	118			0.4723
Cpaaap	WT_Sample3	118			0.4723		0.7529
Caaapa	WT_Sample3	119			1.5023	2.7453	4.8807
Caaapp	WT_Sample3	119			1.5023
Cpaaaa	WT_Sample3	119			0.4832
Cpaaap	WT_Sample3	119			0.4832	2.263	0.8101
Caaaaa	WT_Sample3	120			1.6124	1.4421	1.1695
Caaaap	WT_Sample3	120			1.6124	22.4163	6.9639
Caaapa	WT_Sample3	120			2.0865	1.1837	7.626
Caaapp	WT_Sample3	120			2.0865
Caaaaa	WT_Sample3	121			4.363	1.8119
Caaaap	WT_Sample3	121			4.363	12.9054	29.3803
Caaapa	WT_Sample3	121			1.909	1.2227	6.4423
Caaapp	WT_Sample3	121			1.909
Caaaaa	WT_Sample3	122			3.3779		1.5393
Caaaap	WT_Sample3	122			3.3779	3.6265	16.4748
Caaapa	WT_Sample3	122			1.6498		5.2196
Caaapp	WT_Sample3	122			1.6498
Caaaaa	WT_Sample3	123			2.7639		1.4954
Caaaap	WT_Sample3	123			2.7639	3.8122	12.8483
Caaapa	WT_Sample3	123			1.8005	1.7906	5.8669
Caaapp	WT_Sample3	123			1.8005
Caaaaa	WT_Sample3	124			1.8702	1.7342	1.0421
Caaaap	WT_Sample3	124			1.8702	1.6544	9.0361
Caaapa	WT_Sample3	124			1.2065	2.7019	4.0763
Caaapp	WT_Sample3	124			1.2065
Caaaaa	WT_Sample3	125			0.5449	1.8685	0.6921
Caaaap	WT_Sample3	125			0.5449	5.3122	7.3816
Caaapa	WT_Sample3	125			1.8431	2.1566	6.7782
Caaapp	WT_Sample3	125			1.8431
Caaaaa	WT_Sample3	126			0.824		1.1763
Caaaap	WT_Sample3	126			0.824	6.2599	2.0694
Caaapa	WT_Sample3	126			1.5028	5.4374	4.6216
Caaapp	WT_Sample3	126			1.5028
Caaaaa	WT_Sample3	127			1.8283		1.161
Caaaap	WT_Sample3	127			1.8283		8.3293
Caaapp	WT_Sample3	127			0.5353
ABalppaapa	WT_Sample3	128			0.4914		1.3314			1
ABalppaapp	WT_Sample3	128			0.4914
Caaaaa	WT_Sample3	128			1.9596		1.3514
Caaaap	WT_Sample3	128			1.9596	18.3184	8.4231
Caaapa	WT_Sample3	128			1.3372		4.1837
Caaapp	WT_Sample3	128			1.3372
ABalppaapa	WT_Sample3	129			0.533	0.7555	0.7038			1
ABalppaapp	WT_Sample3	129			0.533
Caaaaa	WT_Sample3	129			4.5773	0.7272	0.7798
Caaaap	WT_Sample3	129			4.5773	19.3959	26.7415
Caaapa	WT_Sample3	129			1.553		4.5421
Caaapp	WT_Sample3	129			1.553
Cpaaaa	WT_Sample3	129			0.4689
Cpaaap	WT_Sample3	129			0.4689	0.8615	0.8374
ABalppaapa	WT_Sample3	130			0.6119					1
ABalppaapp	WT_Sample3	130			0.6119
Caaaaa	WT_Sample3	130			1.8799	1.7646	1.507
Caaaap	WT_Sample3	130			1.8799	17.9932	7.3456
Caaapa	WT_Sample3	130			1.7315	4.2888	5.1247
Caaapp	WT_Sample3	130			1.7315	1.3379
ABalppaapp	WT_Sample3	131			0.6046
Caaaaa	WT_Sample3	131			3.7177
Caaaap	WT_Sample3	131			3.7177	23.3701	25.3388
Caaapa	WT_Sample3	131			0.6087	3.4113	0.8358
ABalppaapp	WT_Sample3	132			0.6894
ABaraaaaaa	WT_Sample3	132			0.6498		0.5859
ABaraaaaap	WT_Sample3	132			0.6498		0.6377
ABplappppa	WT_Sample3	132			0.5626
Caaapa	WT_Sample3	132			1.2252	2.5248	4.2471
Caaapp	WT_Sample3	132			1.2252
ABalppaapp	WT_Sample3	133			0.7569		0.5998
Caaaaa	WT_Sample3	133			5.0727
Caaaap	WT_Sample3	133			5.0727	33.8803	33.6361
Caaapa	WT_Sample3	133			1.8998	6.1105	6.772
Caaapp	WT_Sample3	133			1.8998
Cpaaaa	WT_Sample3	133			0.5366
Cpaaap	WT_Sample3	133			0.5366
ABalaaaala	WT_Sample3	134			0.4584
ABalaaaalp	WT_Sample3	134			0.4584
ABalppaapp	WT_Sample3	134			0.6192
Caaaaa	WT_Sample3	134			0.5903	0.7543	0.5288
Caaaap	WT_Sample3	134			0.5903
Caaapa	WT_Sample3	134			0.856	4.3496	0.6615
Caaapp	WT_Sample3	134			0.856	1.2564
Cpaaaa	WT_Sample3	134			0.6722	0.8141	0.7786
Cpaaap	WT_Sample3	134			0.6722
ABalppaapp	WT_Sample3	135			0.5039
ABarapaapa	WT_Sample3	135			0.633
ABarpapppa	WT_Sample3	136			0.5801
Caaapa	WT_Sample3	136			0.57		0.8208
Caaapp	WT_Sample3	136			0.57
ABalappaap	WT_Sample3	137			0.4606
ABalppaapp	WT_Sample3	137			0.511
Caaapa	WT_Sample3	137			0.5906	4.0098	0.5701
Caaapp	WT_Sample3	137			0.5906
ABarpappaa	WT_Sample3	138			0.7963
ABprpappaa	WT_Sample3	138			0.5649
Caaapa	WT_Sample3	138			1.3894		4.5799
Caaapp	WT_Sample3	138			1.3894
Cpaaaa	WT_Sample3	138			0.5459
Cpaaap	WT_Sample3	138			0.5459		0.7098
ABalappaap	WT_Sample3	139			0.5016
ABarappaaa	WT_Sample3	139			0.5567
ABarappaap	WT_Sample3	139			0.5567
ABarpappaa	WT_Sample3	139			0.6986
ABarpappap	WT_Sample3	139			0.6986	0.867	0.869
Caaapa	WT_Sample3	139			1.1782	3.8039	4.5
Caaapp	WT_Sample3	139			1.1782
Cpaaaa	WT_Sample3	139			0.4913
Cpaaap	WT_Sample3	139			0.4913		0.7557
ABalappaap	WT_Sample3	140			0.4905
ABalppaapa	WT_Sample3	140			0.4821					1
ABalppaapp	WT_Sample3	140			0.4821
Caaaaa	WT_Sample3	140			0.7059		0.8473
Caaaap	WT_Sample3	140			0.7059
Caaapa	WT_Sample3	140			0.6717		0.6961
Caaapp	WT_Sample3	140			0.6717
Capaaa	WT_Sample3	140			1.4969
Capaap	WT_Sample3	140			1.4969		2.6785
Cpaaaa	WT_Sample3	140			0.4622
Cpaaap	WT_Sample3	140			0.4622		0.8202
Z2	WT_Sample3	140			0.5601
ABarpppapa	WT_Sample3	141			0.4904
ABarpppapp	WT_Sample3	141			0.4904
Caaaaa	WT_Sample3	141			0.6757		0.7281
Caaaap	WT_Sample3	141			0.6757
Caaapa	WT_Sample3	141			0.8564	2.2502	1.3376
Caaapp	WT_Sample3	141			0.8564
Capaaa	WT_Sample3	141			1.4752
Capaap	WT_Sample3	141			1.4752	2.8943	2.6822
Cpaaaa	WT_Sample3	141			0.5204
Cpaaap	WT_Sample3	141			0.5204	2.9573	0.8607
Z2	WT_Sample3	141			0.5003
ABalppaapp	WT_Sample3	142			0.4903
ABarpppapa	WT_Sample3	142			0.4812
ABarpppapp	WT_Sample3	142			0.4812
Caaaaa	WT_Sample3	142			0.6241	0.9162	0.7648
Caaaap	WT_Sample3	142			0.6241
Caaapa	WT_Sample3	142			1.3179	0.7626	3.5878
Caaapp	WT_Sample3	142			1.3179
Cpaapa	WT_Sample3	142			0.7518	20.7692	21.9738
Cpaapp	WT_Sample3	142			0.7518
ABalppaapp	WT_Sample3	143			0.5382
ABarpppapa	WT_Sample3	143			0.4623
ABarpppapp	WT_Sample3	143			0.4623
Caaapa	WT_Sample3	143			1.0868	4.2697	4.3505
Caaapp	WT_Sample3	143			1.0868
ABalppaapp	WT_Sample3	144			0.4962
Cpaaaa	WT_Sample3	144			0.5908
Cpaaap	WT_Sample3	144			0.5908		0.8052
ABalppaapa	WT_Sample3	145			0.5056					1
ABalppaapp	WT_Sample3	145			0.5056
ABarapppap	WT_Sample3	145			0.461
ABalppaapp	WT_Sample3	146			0.486
ABaraaapapp	WT_Sample3	146			0.5639
ABarappapa	WT_Sample3	146			0.5059
ABplaapaaa	WT_Sample3	146			0.5919
ABplaapaap	WT_Sample3	146			0.5919		0.8288
ABpraappaa	WT_Sample3	146			0.4987
ABpraappap	WT_Sample3	146			0.4987
Caaaaa	WT_Sample3	146			0.6174		1.0316
Caaaap	WT_Sample3	146			0.6174	1.8639	1.3388
Cpaaaa	WT_Sample3	146			0.5421
Cpaaap	WT_Sample3	146			0.5421		0.834
ABalppaapp	WT_Sample3	147			0.4876
ABarappapa	WT_Sample3	147			0.5338
ABalpaaaap	WT_Sample3	148			0.551
ABalppaapp	WT_Sample3	148			0.6043
ABplaaapaa	WT_Sample3	148			0.7344
ABplaaapap	WT_Sample3	148			0.7344	1.226	0.8645
ABprppppapa	WT_Sample3	148			0.5589
Cpaapp	WT_Sample3	148			0.5028
ABprppppapa	WT_Sample3	149			0.5065
ABprppppapp	WT_Sample3	149			0.5065		0.7119
Caaapa	WT_Sample3	149			0.5668	0.7453
Caaapp	WT_Sample3	149			0.5668	1.0883
Cpaapp	WT_Sample3	149			0.4558
ABaraappapa	WT_Sample3	150			0.6644	2.625	2.5211
ABaraappapp	WT_Sample3	150			0.6644
ABarpapppa	WT_Sample3	150			0.4836
ABarpapppp	WT_Sample3	150			0.4836		0.9155
ABprappppp	WT_Sample3	150			0.5468
Caaaaa	WT_Sample3	150			0.5186	0.9771	1.346
Caaaap	WT_Sample3	150			0.5186
Caaapa	WT_Sample3	150			0.8396
Cpaaaa	WT_Sample3	150			0.4746
Cpaaap	WT_Sample3	150			0.4746		0.7331
Cpaapp	WT_Sample3	150			0.6159
ABarappaaa	WT_Sample3	151			0.5264
ABarappaap	WT_Sample3	151			0.5264		0.7327
ABarpaappa	WT_Sample3	151			0.6313	1.4094	0.8275
ABarpaappp	WT_Sample3	151			0.6313
ABarppaapp	WT_Sample3	151			0.6296
ABprppppapa	WT_Sample3	151			0.5007
ABprppppapp	WT_Sample3	151			0.5007		0.6273
Caaapa	WT_Sample3	151			0.6641
Caaapp	WT_Sample3	151			0.6641		0.8572
Cpaaaa	WT_Sample3	151			0.5774
Cpaaap	WT_Sample3	151			0.5774		0.7986
Cpaapp	WT_Sample3	151			0.7633		0.5676
ABarappaaa	WT_Sample3	152			0.5427
ABarappaap	WT_Sample3	152			0.5427		0.695
ABplapaaaa	WT_Sample3	152			0.4605
ABplapaaap	WT_Sample3	152			0.4605
ABprappppa	WT_Sample3	152			0.4804
ABprappppp	WT_Sample3	152			0.4804
ABprpappaaa	WT_Sample3	152			0.468
ABprpappaap	WT_Sample3	152			0.468
ABprppppapa	WT_Sample3	152			0.4695
ABprppppapp	WT_Sample3	152			0.4695
Cpaaaa	WT_Sample3	152			0.5422
Cpaaap	WT_Sample3	152			0.5422		0.7033
Cpaapp	WT_Sample3	152			0.8505		0.7458
ABarappaaa	WT_Sample3	153			0.5171
ABarappaap	WT_Sample3	153			0.5171		0.7696
ABarpaappp	WT_Sample3	153			0.615
ABarppaapa	WT_Sample3	153			0.7039	1.2672	1.173
ABarppaapp	WT_Sample3	153			0.7039
ABplaaappp	WT_Sample3	153			0.552
Cpaaaa	WT_Sample3	153			0.6186
Cpaaap	WT_Sample3	153			0.6186		0.8918
Cpaapp	WT_Sample3	153			0.7503		0.5548
ABarappaaa	WT_Sample3	154			0.505
ABarappaap	WT_Sample3	154			0.505		0.6789
ABplpappaaa	WT_Sample3	154			0.7885
ABprpaapaaa	WT_Sample3	154			0.7318	1.7421	1.8963
ABprpaapaap	WT_Sample3	154			0.7318
Caaaaa	WT_Sample3	154			0.6544	0.6983	1.2869
Caaaap	WT_Sample3	154			0.6544	1.115	0.6061
Cpaaaa	WT_Sample3	154			0.5069	0.7509
Cpaaap	WT_Sample3	154			0.5069	6.4136	0.8574
Cpaapp	WT_Sample3	154			0.8111		0.6758
ABalaapaaa	WT_Sample3	155			0.4676
ABalaapaap	WT_Sample3	155			0.4676
ABalpapaaaa	WT_Sample3	155			0.5692
ABalpapaaap	WT_Sample3	155			0.5692
ABarappaaa	WT_Sample3	155			0.4995
ABprpappaaa	WT_Sample3	155			0.5449
ABprpappaap	WT_Sample3	155			0.5449
Caaapa	WT_Sample3	155			0.4556
Caaapp	WT_Sample3	155			0.4556		0.6702
Cpaapp	WT_Sample3	155			0.8357		0.7121
ABarappaaa	WT_Sample3	156			0.4968
ABprappppa	WT_Sample3	156			0.525		0.7059
ABprappppp	WT_Sample3	156			0.525
ABprpappapa	WT_Sample3	156			0.4555
ABprpappapp	WT_Sample3	156			0.4555		0.485
Caaapp	WT_Sample3	156			0.5869		0.6946
Cpaaaa	WT_Sample3	156			0.657		0.5299
Cpaaap	WT_Sample3	156			0.657	7.4069
Cpaapp	WT_Sample3	156			0.842		0.7309
ABalappaap	WT_Sample3	157			0.48
ABalpapaaaa	WT_Sample3	157			0.4555
ABalpapaaap	WT_Sample3	157			0.4555
ABprpappaaa	WT_Sample3	157			0.465
ABprpappaap	WT_Sample3	157			0.465
ABprpappapa	WT_Sample3	157			0.7395		0.5138
Caaaaa	WT_Sample3	157			0.5099	0.8457	1.207
Caaaap	WT_Sample3	157			0.5099
Caaapa	WT_Sample3	157			0.4776		0.6003
Caaapp	WT_Sample3	157			0.4776		0.6148
Cpaaaa	WT_Sample3	157			0.9327	0.8669
Cpaaap	WT_Sample3	157			0.9327	8.0748	7.2609
Cpaapa	WT_Sample3	157			0.861
Cpaapp	WT_Sample3	157			0.861		0.7971
ABalpapaaaa	WT_Sample3	158			0.4775
ABalpapaaap	WT_Sample3	158			0.4775
ABplaaaapa	WT_Sample3	158			0.7004		0.5947
ABplaaaapp	WT_Sample3	158			0.7004	1.3253	0.8467
ABprpappapa	WT_Sample3	158			0.5541
ABprppppapa	WT_Sample3	158			0.4617
ABprppppapp	WT_Sample3	158			0.4617
Caaapa	WT_Sample3	158			0.7177
Caaapp	WT_Sample3	158			0.7177		0.9135
Cpaaap	WT_Sample3	158			0.9521	5.3563	0.8139
Cpaapp	WT_Sample3	158			0.8862		0.8149
ABarpaappa	WT_Sample3	159			0.5019	1.0008
ABarpaappp	WT_Sample3	159			0.5019		0.5544
ABarpappaa	WT_Sample3	159			0.7088
ABarpappap	WT_Sample3	159			0.7088	0.8703	0.8647
ABplaaapaa	WT_Sample3	159			0.5992
ABplaaapap	WT_Sample3	159			0.5992		0.6548
ABprpappapa	WT_Sample3	159			0.7053
Caaapa	WT_Sample3	159			0.5762
Caaapp	WT_Sample3	159			0.5762		0.7438
Cpaapa	WT_Sample3	159			0.5909	57.422	32.0969
Cpaapp	WT_Sample3	159			0.5909		0.8604
Ealaa	WT_Sample3	159			0.5055		0.9173
Ealap	WT_Sample3	159			0.5055
MSaaappa	WT_Sample3	159			4.1837		20.1286			1
MSaaappp	WT_Sample3	159			4.1837
ABplaapappa	WT_Sample3	160			0.6527
ABprpaapaaa	WT_Sample3	160			0.6143	1.8584	1.7796
ABprpaapaap	WT_Sample3	160			0.6143
ABprpappaap	WT_Sample3	160			0.4564
ABprpappapa	WT_Sample3	160			0.6083
ABprppppapa	WT_Sample3	160			0.4591
ABprppppapp	WT_Sample3	160			0.4591
ABprpppppaa	WT_Sample3	160			0.5437		0.7378
ABprpppppap	WT_Sample3	160			0.5437
Caaapp	WT_Sample3	160			0.5684		0.6818
Cpaaap	WT_Sample3	160			0.949	8.3855	0.7927
Cpaapa	WT_Sample3	160			3.3711	83.7347	89.5189
Cpaapp	WT_Sample3	160			3.3711		0.5785
Ealaa	WT_Sample3	160			0.5039	0.92	0.9224
Ealap	WT_Sample3	160			0.5039
MSaaappa	WT_Sample3	160			4.1666	21.1418	20.3772			1
MSaaappp	WT_Sample3	160			4.1666
ABalppappaa	WT_Sample3	161			0.5793		0.8089
ABalppappap	WT_Sample3	161			0.5793
ABarpaappa	WT_Sample3	161			0.5008
ABarpaappp	WT_Sample3	161			0.5008
ABplaaapaa	WT_Sample3	161			0.5215
ABplaaapap	WT_Sample3	161			0.5215		0.4939
ABplpppppaa	WT_Sample3	161			0.4749		0.8623
ABplpppppap	WT_Sample3	161			0.4749
ABpraapappa	WT_Sample3	161			0.5421
ABpraapappp	WT_Sample3	161			0.5421	0.7721	0.7913
ABprpappapa	WT_Sample3	161			0.6254
ABprpppppaa	WT_Sample3	161			0.5036		0.738
ABprpppppap	WT_Sample3	161			0.5036
Caaapp	WT_Sample3	161			0.7651		0.8311
Cpaaaa	WT_Sample3	161			0.7861	0.9066	0.6561
Cpaaap	WT_Sample3	161			0.7861	8.526	7.5928
Cpaapa	WT_Sample3	161			0.6278	15.3497	5.7842
Cpaapp	WT_Sample3	161			0.6278		0.88
Epraa	WT_Sample3	161			0.5446
Eprap	WT_Sample3	161			0.5446	0.9269	0.8472
MSppappa	WT_Sample3	161			0.5635	0.7358	0.7479
MSppappp	WT_Sample3	161			0.5635
ABalppaappa	WT_Sample3	162			0.5251		0.5347			1
ABalppaappp	WT_Sample3	162			0.5251		0.5245
ABalppapapa	WT_Sample3	162			0.4867		0.4925
ABalppapapp	WT_Sample3	162			0.4867
ABalppappaa	WT_Sample3	162			0.5781		0.7389
ABalppappap	WT_Sample3	162			0.5781
ABarappapaa	WT_Sample3	162			0.4838
ABarappapap	WT_Sample3	162			0.4838
ABarpppapa	WT_Sample3	162			0.5373		0.5367
ABarpppapp	WT_Sample3	162			0.5373
ABplaaapaa	WT_Sample3	162			0.4816
ABplaaapap	WT_Sample3	162			0.4816
ABplpppppaa	WT_Sample3	162			0.5518	0.928	1.1128
ABplpppppap	WT_Sample3	162			0.5518
ABprpappapa	WT_Sample3	162			0.6819
Caaaaa	WT_Sample3	162			0.4909
Caaapp	WT_Sample3	162			0.5539		0.6604
Cpaaaa	WT_Sample3	162			0.5124
ABalppapapa	WT_Sample3	163			0.5905		0.5949
ABalppapapp	WT_Sample3	163			0.5905
ABalppappaa	WT_Sample3	163			0.5031		0.6349
ABalppappap	WT_Sample3	163			0.5031
ABarappaapa	WT_Sample3	163			0.5096
ABarappapaa	WT_Sample3	163			0.5878
ABarappapap	WT_Sample3	163			0.5878		0.6309
ABplaaapaa	WT_Sample3	163			0.5166
ABplaaapap	WT_Sample3	163			0.5166
ABprpaaapaa	WT_Sample3	163			0.4839
ABprpaaapap	WT_Sample3	163			0.4839
ABprpappapa	WT_Sample3	163			0.6797
Caaaaa	WT_Sample3	163			0.7942		0.7698
Caaapa	WT_Sample3	163			0.6467
Caaapp	WT_Sample3	163			0.6467		0.8019
Cpaaaa	WT_Sample3	163			0.6497
Cpaaap	WT_Sample3	163			0.6497	10.1537	0.8463
Cpaapa	WT_Sample3	163			0.9043
Cpaapp	WT_Sample3	163			0.9043		0.8722
Epraa	WT_Sample3	163			0.5144
Eprap	WT_Sample3	163			0.5144		0.8018
ABalpapaaap	WT_Sample3	164			0.6379
ABalppapapa	WT_Sample3	164			0.5616
ABalppapapp	WT_Sample3	164			0.5616
ABarappaapa	WT_Sample3	164			0.4672
ABarappaapp	WT_Sample3	164			0.4672					1
ABarappapaa	WT_Sample3	164			0.6036
ABarappapap	WT_Sample3	164			0.6036		0.6131
ABarpappaa	WT_Sample3	164			0.4853
ABarpappap	WT_Sample3	164			0.4853
ABplaaaapa	WT_Sample3	164			0.4696
ABplaaaapp	WT_Sample3	164			0.4696
ABplaaapaa	WT_Sample3	164			0.4835
ABplaaapap	WT_Sample3	164			0.4835
ABprpappapa	WT_Sample3	164			0.6886
Caaaaa	WT_Sample3	164			0.8352		0.8479
Caaapa	WT_Sample3	164			0.5811		0.4969
Caaapp	WT_Sample3	164			0.5811		0.7195
Cpaaaa	WT_Sample3	164			1.273
Cpaaap	WT_Sample3	164			1.273	10.1369	9.3073
Cpaapa	WT_Sample3	164			0.8964
Cpaapp	WT_Sample3	164			0.8964		0.8632
Dappa	WT_Sample3	164			0.9236
Dappp	WT_Sample3	164			0.9236		1.9174
Eplaa	WT_Sample3	164			0.5455		0.9499
Eplap	WT_Sample3	164			0.5455
MSpapaaaa	WT_Sample3	164			0.5649
MSpapaaap	WT_Sample3	164			0.5649		0.7564
MSpapappa	WT_Sample3	164			0.7597	0.9134	0.9538
MSpapappp	WT_Sample3	164			0.7597
ABalpapaaap	WT_Sample3	165			0.742
ABalppapapa	WT_Sample3	165			0.618
ABarappaapa	WT_Sample3	165			0.4674		0.4903
ABarappaapp	WT_Sample3	165			0.4674					1
ABarappapaa	WT_Sample3	165			0.5256
ABarappapap	WT_Sample3	165			0.5256		0.6601
ABarpaappa	WT_Sample3	165			0.5679
ABarpaappp	WT_Sample3	165			0.5679		0.575
ABarpappaa	WT_Sample3	165			0.5041
ABarpappap	WT_Sample3	165			0.5041
ABprpappaap	WT_Sample3	165			0.4888
ABprpappapa	WT_Sample3	165			0.7047		0.5575
ABprpappapp	WT_Sample3	165			0.7047		0.6483
Caaaaa	WT_Sample3	165			0.7952		0.8428
Caaaap	WT_Sample3	165			0.7952
Caaapp	WT_Sample3	165			0.7992		0.865
Cpaaaa	WT_Sample3	165			0.92		0.8758
Cpaaap	WT_Sample3	165			0.92		0.8296
Cpaapa	WT_Sample3	165			0.9195
Cpaapp	WT_Sample3	165			0.9195		0.9034
Dappa	WT_Sample3	165			0.9723
Dappp	WT_Sample3	165			0.9723	2.3789	2.4296
Ealaa	WT_Sample3	165			0.5381		0.9556
Ealap	WT_Sample3	165			0.5381
Eplaa	WT_Sample3	165			0.5565	1.0413	0.9528
Eplap	WT_Sample3	165			0.5565
MSaaappa	WT_Sample3	165			4.0712		20.3095			1
MSaaappp	WT_Sample3	165			4.0712
ABalpapaaap	WT_Sample3	166			0.715
ABarapapaaa	WT_Sample3	166			0.5405	1.9335	2.1202			1
ABarapapaap	WT_Sample3	166			0.5405
ABarappaapa	WT_Sample3	166			0.5318		0.5085
ABarappaapp	WT_Sample3	166			0.5318					1
ABarapppapa	WT_Sample3	166			0.5049
ABarapppapp	WT_Sample3	166			0.5049
ABarpaappa	WT_Sample3	166			0.5587
ABarpaappp	WT_Sample3	166			0.5587		0.5821
ABarpappaa	WT_Sample3	166			0.5162
ABarpappap	WT_Sample3	166			0.5162		0.53
ABprpappaap	WT_Sample3	166			0.4555
ABprpappapa	WT_Sample3	166			0.6373
ABprpappapp	WT_Sample3	166			0.6373		0.5929
Caaaaa	WT_Sample3	166			0.8291		0.8526
Caaapp	WT_Sample3	166			0.7491		0.8359
Cpaaaa	WT_Sample3	166			0.9586		0.9291
Cpaapp	WT_Sample3	166			0.9251		0.906
Ealaa	WT_Sample3	166			0.5229		0.9672
Ealap	WT_Sample3	166			0.5229
MSaaappa	WT_Sample3	166			4.2756		20.9543			1
MSaaappp	WT_Sample3	166			4.2756
ABalpappapa	WT_Sample3	167			0.4938
ABalpappapp	WT_Sample3	167			0.4938		0.6972
ABalppapapa	WT_Sample3	167			0.5128
ABalppapapp	WT_Sample3	167			0.5128
ABarapapapa	WT_Sample3	167			0.6391
ABarapapapp	WT_Sample3	167			0.6391	0.8104	1.194
ABarappaapa	WT_Sample3	167			0.5972		0.5991
ABarappapaa	WT_Sample3	167			0.5581
ABarappapap	WT_Sample3	167			0.5581		0.5054
ABarapppapp	WT_Sample3	167			0.7382		0.4837
ABarpappaa	WT_Sample3	167			0.5183
ABarpappap	WT_Sample3	167			0.5183		0.5087
ABarpppapa	WT_Sample3	167			0.6185		0.4898
ABarpppapp	WT_Sample3	167			0.6185
ABpraaapapa	WT_Sample3	167			0.6384		0.643
ABprpappapa	WT_Sample3	167			0.4811		0.5042
ABprpappapp	WT_Sample3	167			0.4811
Caaaap	WT_Sample3	167			10.3358	69.3347	68.6844
Caaapa	WT_Sample3	167			0.4958		0.5918
Caaapp	WT_Sample3	167			0.4958		0.6317
Cpaaaa	WT_Sample3	167			0.9322		0.875
Cpaaap	WT_Sample3	167			0.9322		0.8943
Cpaapa	WT_Sample3	167			0.9033
Cpaapp	WT_Sample3	167			0.9033		0.8806
Ealaa	WT_Sample3	167			0.5386		0.9738
Ealap	WT_Sample3	167			0.5386
Eprpa	WT_Sample3	167			0.6919	1.5213	1.3695
Eprpp	WT_Sample3	167			0.6919
MSaaappa	WT_Sample3	167			4.1115	0.9277	20.3327			1
MSaaappp	WT_Sample3	167			4.1115
MSaappaa	WT_Sample3	167			0.7007
MSaappap	WT_Sample3	167			0.7007	1.1848	1.0501
ABalppapapa	WT_Sample3	168			0.5694
ABalppapapp	WT_Sample3	168			0.5694
ABarappaapa	WT_Sample3	168			0.5584		0.5031
ABarapppapp	WT_Sample3	168			0.6571
ABarpappaa	WT_Sample3	168			0.5486
ABarpappap	WT_Sample3	168			0.5486		0.5203
ABarpppapa	WT_Sample3	168			0.602		0.773
ABarpppapp	WT_Sample3	168			0.602
ABplaaapaa	WT_Sample3	168			0.4649
ABplaaapap	WT_Sample3	168			0.4649
ABplaaappa	WT_Sample3	168			0.5596
ABplaaappp	WT_Sample3	168			0.5596		0.8577
ABpraapaaaa	WT_Sample3	168			0.4633
Caaaaa	WT_Sample3	168			0.8277		0.8103
Caaapp	WT_Sample3	168			0.7653		0.8297
Cpaaaa	WT_Sample3	168			0.9661		0.9396
Cpaapp	WT_Sample3	168			0.941		0.9371
Dappa	WT_Sample3	168			0.9497
Dappp	WT_Sample3	168			0.9497	2.7268	2.3134
Ealaa	WT_Sample3	168			0.5412		0.9755
Ealap	WT_Sample3	168			0.5412
Eplap	WT_Sample3	168			0.5351
MSaaappa	WT_Sample3	168			4.2831	15.349	21.2604			1
MSaaappp	WT_Sample3	168			4.2831
MSpapappa	WT_Sample3	168			0.6828	0.691	0.7985
MSpapappp	WT_Sample3	168			0.6828
ABalaaapall	WT_Sample3	169			0.5559
ABalppapapa	WT_Sample3	169			0.7206
ABaraaapppa	WT_Sample3	169			0.4595
ABaraaapppp	WT_Sample3	169			0.4595		0.5415
ABarappaapa	WT_Sample3	169			0.4917		0.5036
ABarappaapp	WT_Sample3	169			0.4917					1
ABarappapaa	WT_Sample3	169			0.619
ABarappapap	WT_Sample3	169			0.619		0.5942
ABarapppapa	WT_Sample3	169			0.5134
ABarapppapp	WT_Sample3	169			0.5134
ABarpappaa	WT_Sample3	169			0.5444
ABarpappap	WT_Sample3	169			0.5444
ABarpppapa	WT_Sample3	169			0.6414		0.8363
ABarpppapp	WT_Sample3	169			0.6414
ABpraaapapa	WT_Sample3	169			0.6286		0.5838
ABprpppaaaa	WT_Sample3	169			0.5205
ABprpppaaap	WT_Sample3	169			0.5205
Caaaaa	WT_Sample3	169			7.0387		0.8146
Caaaap	WT_Sample3	169			7.0387	48.5789	47.9449
Caaapp	WT_Sample3	169			0.7143		0.8052
Cpaaaa	WT_Sample3	169			0.9249		0.8484
Cpaapa	WT_Sample3	169			0.9297
Cpaapp	WT_Sample3	169			0.9297		0.9265
MSaaappa	WT_Sample3	169			1.0974	0.8106	5.9114			1
MSaaappp	WT_Sample3	169			1.0974
ABalaaaalal	WT_Sample3	170			0.466
ABalaaaalar	WT_Sample3	170			0.466					1
ABalpaaaaaa	WT_Sample3	170			0.4869
ABalpaaaaap	WT_Sample3	170			0.4869		0.5313
ABarappaapa	WT_Sample3	170			0.502
ABarappapap	WT_Sample3	170			0.5792		0.496
ABarapppapp	WT_Sample3	170			0.7158
ABarpappaa	WT_Sample3	170			0.5517
ABarpappap	WT_Sample3	170			0.5517		0.4903
ABarpppapa	WT_Sample3	170			0.5827		0.8339
ABarpppapp	WT_Sample3	170			0.5827
ABprpppaaaa	WT_Sample3	170			0.5559
ABprpppaaap	WT_Sample3	170			0.5559
Caaapp	WT_Sample3	170			0.8758		0.932
Cpaaaa	WT_Sample3	170			0.9489		0.9173
Cpaapa	WT_Sample3	170			0.9176
Cpaapp	WT_Sample3	170			0.9176		0.8961
Cpapaa	WT_Sample3	170			0.4986
Cpapap	WT_Sample3	170			0.4986		0.7598
Dappa	WT_Sample3	170			0.8536
Dappp	WT_Sample3	170			0.8536		2.1085
Eplaa	WT_Sample3	170			0.5326		0.9747
Eplap	WT_Sample3	170			0.5326	0.9624
MSaaappa	WT_Sample3	170			0.9215		5.1008			1
MSaaappp	WT_Sample3	170			0.9215
ABalpaaaaaa	WT_Sample3	171			0.4742
ABalpaaaaap	WT_Sample3	171			0.4742		0.485
ABarappaapa	WT_Sample3	171			0.4701
ABarappaapp	WT_Sample3	171			0.4701					1
ABarapppapa	WT_Sample3	171			0.6212		0.5123
ABarapppapp	WT_Sample3	171			0.6212
ABarpappaa	WT_Sample3	171			0.5378
ABarpappap	WT_Sample3	171			0.5378
ABarpppapp	WT_Sample3	171			0.7429
ABprpppaaaa	WT_Sample3	171			0.5767
ABprpppaaap	WT_Sample3	171			0.5767
Caaaap	WT_Sample3	171			0.8088
Caaapp	WT_Sample3	171			0.7326		0.8112
Cpaaaa	WT_Sample3	171			0.7182		0.8834
Cpaaap	WT_Sample3	171			0.7182	5.7364
Cpaapp	WT_Sample3	171			0.927		0.9073
Cpapaa	WT_Sample3	171			0.5211
Cpapap	WT_Sample3	171			0.5211		0.8509
Dappa	WT_Sample3	171			0.9131
Dappp	WT_Sample3	171			0.9131		2.3723
Eplap	WT_Sample3	171			0.9606	0.998	0.9377
Eplpa	WT_Sample3	171			0.5205	1.0352	1.0923
Eplpp	WT_Sample3	171			0.5205
MSaaappa	WT_Sample3	171			0.8859	12.5377	5.1121			1
MSaaappp	WT_Sample3	171			0.8859
MSpapaaaa	WT_Sample3	171			0.5682
MSpapaaap	WT_Sample3	171			0.5682		0.8335
MSpapappa	WT_Sample3	171			0.6903		0.8215
MSpapappp	WT_Sample3	171			0.6903
ABalapppppa	WT_Sample3	172			0.5464
ABarapapaap	WT_Sample3	172			0.5384
ABarappaaaa	WT_Sample3	172			0.5828
ABarappaaap	WT_Sample3	172			0.5828					1
ABarappaapp	WT_Sample3	172			0.508					1
ABarappapap	WT_Sample3	172			0.6215		0.491
ABarapppapa	WT_Sample3	172			0.6982		0.5154
ABarapppapp	WT_Sample3	172			0.6982		0.6103
ABarpaapaa	WT_Sample3	172			0.7347
ABarpappaa	WT_Sample3	172			0.6189		0.5295
ABarpappap	WT_Sample3	172			0.6189		0.5352
ABarpppapa	WT_Sample3	172			0.5958		0.8898
ABarpppapp	WT_Sample3	172			0.5958	0.838
ABplaaapaa	WT_Sample3	172			0.4739
ABplaaapap	WT_Sample3	172			0.4739
ABplaaappa	WT_Sample3	172			0.4706
ABplaaappp	WT_Sample3	172			0.4706		0.4912
ABplaapapaa	WT_Sample3	172			0.8219
ABplaapapap	WT_Sample3	172			0.8219	1.0559	1.5973
ABprpppaaaa	WT_Sample3	172			0.5346
ABprpppaaap	WT_Sample3	172			0.5346
ABprpppaapa	WT_Sample3	172			0.4756
Caaapp	WT_Sample3	172			0.7479		0.8363
Cpaaaa	WT_Sample3	172			0.4573		0.6984
Cpaaap	WT_Sample3	172			0.4573	6.8469	5.9695
Cpaapa	WT_Sample3	172			0.9294	6.0042
Cpaapp	WT_Sample3	172			0.9294		0.9288
Cpapaa	WT_Sample3	172			0.4625
Cpapap	WT_Sample3	172			0.4625		0.6155
Dappa	WT_Sample3	172			0.802
Dappp	WT_Sample3	172			0.802	2.7524	2.176
Eplap	WT_Sample3	172			0.521
MSaaappa	WT_Sample3	172			3.4519	1.7527	17.6498			1
MSaaappp	WT_Sample3	172			3.4519
MSpapaaaa	WT_Sample3	172			0.596	2.4114
MSpapaaap	WT_Sample3	172			0.596	0.9383	0.7127
MSpapappa	WT_Sample3	172			0.725	1.316	0.8484
MSpapappp	WT_Sample3	172			0.725
ABalppapapa	WT_Sample3	173			0.5337
ABarapapppa	WT_Sample3	173			0.6279
ABarappapaa	WT_Sample3	173			0.7149
ABarapppapa	WT_Sample3	173			0.6205
ABarapppapp	WT_Sample3	173			0.6205		0.552
ABarpappaa	WT_Sample3	173			0.5177		0.5309
ABarpappap	WT_Sample3	173			0.5177
ABarpapppa	WT_Sample3	173			0.5489		0.6224
ABarpapppp	WT_Sample3	173			0.5489
ABarpppapp	WT_Sample3	173			0.8077
ABplaaappa	WT_Sample3	173			0.7028
ABplaaappp	WT_Sample3	173			0.7028		0.9234
ABprpaapapa	WT_Sample3	173			0.5721		0.6143
ABprpaapapp	WT_Sample3	173			0.5721					1
ABprpppaaaa	WT_Sample3	173			0.6687
Caaaaa	WT_Sample3	173			0.766		0.7113
Caaapp	WT_Sample3	173			0.7894		0.871
Caappd	WT_Sample3	173			0.5589		0.6932
Caappv	WT_Sample3	173			0.5589
Cpaaaa	WT_Sample3	173			0.9426		0.9111
Cpaaap	WT_Sample3	173			0.9426		0.8774
Cpaapa	WT_Sample3	173			0.6618	6.2511	5.7593
Cpapaa	WT_Sample3	173			0.7901		0.9511
Cpapap	WT_Sample3	173			0.7901		0.6497
Dpppa	WT_Sample3	173			0.5394
Dpppp	WT_Sample3	173			0.5394		0.8665
Ealaa	WT_Sample3	173			0.4951		0.9235
Ealap	WT_Sample3	173			0.4951
Earpa	WT_Sample3	173			0.4822
Eplap	WT_Sample3	173			0.5165
MSaaappa	WT_Sample3	173			3.9037	10.8451	19.4025			1
MSaaappp	WT_Sample3	173			3.9037
MSpapaaaa	WT_Sample3	173			0.9704	2.023	1.9727
MSpapaaap	WT_Sample3	173			0.9704
MSpppaap	WT_Sample3	173			0.7002
ABalpapaapa	WT_Sample3	174			0.7233
ABalpapaapp	WT_Sample3	174			0.7233	4.3112	4.1105			1
ABarapapaap	WT_Sample3	174			0.5142
ABarapppapa	WT_Sample3	174			0.4741
ABarapppapp	WT_Sample3	174			0.4741
ABarpaapaa	WT_Sample3	174			0.5775
ABarpaapap	WT_Sample3	174			0.5775		0.7553
ABarpaappp	WT_Sample3	174			0.7511
ABarpappaa	WT_Sample3	174			0.5153
ABarpappap	WT_Sample3	174			0.5153
ABarpapppa	WT_Sample3	174			0.4889		0.4958
ABarpapppp	WT_Sample3	174			0.4889
ABarppaaaa	WT_Sample3	174			0.5243
ABarppaaap	WT_Sample3	174			0.5243		0.6626
ABarpppapp	WT_Sample3	174			0.7689	1.2034
ABplaaapaa	WT_Sample3	174			0.4935
ABplaaapap	WT_Sample3	174			0.4935
ABplaaappa	WT_Sample3	174			0.7075
ABplaaappp	WT_Sample3	174			0.7075		0.9076
ABplaapaapa	WT_Sample3	174			0.4811
ABplaapaapp	WT_Sample3	174			0.4811
ABplpppaaaa	WT_Sample3	174			0.4633
ABpraaapapa	WT_Sample3	174			0.4656
ABprpppaaaa	WT_Sample3	174			0.6407
Caaapp	WT_Sample3	174			0.7973		0.859
Cpaaaa	WT_Sample3	174			0.9405		0.889
Cpapap	WT_Sample3	174			0.9294		0.889
Dpppa	WT_Sample3	174			0.472
Dpppp	WT_Sample3	174			0.472		0.6532
Ealpa	WT_Sample3	174			0.7291
Ealpp	WT_Sample3	174			0.7291	1.9872	1.4144
Eplap	WT_Sample3	174			0.5306
MSaaappa	WT_Sample3	174			1.6398	6.1408	8.5574			1
MSaaappp	WT_Sample3	174			1.6398
ABalpaaappp	WT_Sample3	175			0.4792
ABalpapaaaa	WT_Sample3	175			0.5334
ABalppapapa	WT_Sample3	175			0.4778
ABarapaaapa	WT_Sample3	175			0.4567
ABarapaaapp	WT_Sample3	175			0.4567					1
ABarapppapa	WT_Sample3	175			0.4591
ABarapppapp	WT_Sample3	175			0.4591
ABarpaapaa	WT_Sample3	175			0.7628
ABarpaappp	WT_Sample3	175			0.7343
ABarpappaa	WT_Sample3	175			0.5335
ABarpappap	WT_Sample3	175			0.5335
ABarpapppa	WT_Sample3	175			0.5301		0.5703
ABarpapppp	WT_Sample3	175			0.5301
ABarpppapp	WT_Sample3	175			0.4824		1.0446
ABplaaappa	WT_Sample3	175			0.7567
ABplaaappp	WT_Sample3	175			0.7567	0.872	0.9305
ABprpaaaapa	WT_Sample3	175			0.4768
ABprpaaaapp	WT_Sample3	175			0.4768
ABprpppaaaa	WT_Sample3	175			0.6032
Caaapp	WT_Sample3	175			0.7874		0.8632
Caappd	WT_Sample3	175			0.6613		0.8064
Caappv	WT_Sample3	175			0.6613
Cpaaaa	WT_Sample3	175			0.9574		0.9248
Cpapaa	WT_Sample3	175			0.8805		0.8474
Cpapap	WT_Sample3	175			0.8805		0.9173
Dpppa	WT_Sample3	175			0.5076
Dpppp	WT_Sample3	175			0.5076		0.637
Eplap	WT_Sample3	175			0.5273
MSaaappa	WT_Sample3	175			2.7574	7.0016	14.6983			1
MSaaappp	WT_Sample3	175			2.7574
MSaapaaaa	WT_Sample3	175			0.4819
MSaapaaap	WT_Sample3	175			0.4819	1.1523	1.1077
MSaapappa	WT_Sample3	175			0.5236	0.9991	0.7093
MSaapappp	WT_Sample3	175			0.5236
MSappaaa	WT_Sample3	175			0.5306	0.7001	0.6267
MSappaap	WT_Sample3	175			0.5306
ABarapppapa	WT_Sample3	176			0.4587
ABarapppapp	WT_Sample3	176			0.4587
ABarpaapaa	WT_Sample3	176			0.5053
ABarpaapap	WT_Sample3	176			0.5053		0.8044
ABarpapapa	WT_Sample3	176			0.5683
ABarpapapp	WT_Sample3	176			0.5683		0.7544
ABarpappaa	WT_Sample3	176			0.5042
ABarpappap	WT_Sample3	176			0.5042
ABarpapppa	WT_Sample3	176			0.5546		0.5199
ABarpapppp	WT_Sample3	176			0.5546
ABarpppapp	WT_Sample3	176			0.5267		0.8777
ABplaapaapa	WT_Sample3	176			0.5388
ABplaapaapp	WT_Sample3	176			0.5388
ABplpppapaa	WT_Sample3	176			0.6187
ABplpppapap	WT_Sample3	176			0.6187		0.6677
ABprpaaaapa	WT_Sample3	176			0.5025
ABprpaaaapp	WT_Sample3	176			0.5025
ABprpppaaaa	WT_Sample3	176			0.4711
ABprppppaaa	WT_Sample3	176			0.5487
ABprppppaap	WT_Sample3	176			0.5487		0.7151
Caaapp	WT_Sample3	176			0.8788		0.9255
Cpaaaa	WT_Sample3	176			0.9432		0.8832
Cpapap	WT_Sample3	176			0.9438		0.9363
Cpappv	WT_Sample3	176			0.8366
Dpppa	WT_Sample3	176			0.5988
Dpppp	WT_Sample3	176			0.5988		0.6777
Ealap	WT_Sample3	176			0.5254
Ealpa	WT_Sample3	176			0.7051
Ealpp	WT_Sample3	176			0.7051	1.932	1.4186
Eplap	WT_Sample3	176			0.5165
MSaaappa	WT_Sample3	176			4.4085		21.6998			1
MSaaappp	WT_Sample3	176			4.4085
MSpapappa	WT_Sample3	176			0.5589
MSpapappp	WT_Sample3	176			0.5589	0.6708
ABalpaaappa	WT_Sample3	177			0.7575		0.6851			1
ABalpapaaaa	WT_Sample3	177			0.4625
ABarpaappa	WT_Sample3	177			0.5078		0.5495
ABarpaappp	WT_Sample3	177			0.5078
ABarpappap	WT_Sample3	177			0.527
ABarpapppa	WT_Sample3	177			0.523
ABarpapppp	WT_Sample3	177			0.523
ABarppaaaa	WT_Sample3	177			0.4583
ABarppaaap	WT_Sample3	177			0.4583		0.582
ABarppaapa	WT_Sample3	177			0.5357		0.725
ABarppaapp	WT_Sample3	177			0.5357
ABarpppapp	WT_Sample3	177			0.5932		0.6051
ABplaaapaa	WT_Sample3	177			0.4615
ABplaaapap	WT_Sample3	177			0.4615
ABplaaappa	WT_Sample3	177			0.7234
ABplaaappp	WT_Sample3	177			0.7234		0.8727
ABplaappaa	WT_Sample3	177			0.5858		0.7583
ABplaappap	WT_Sample3	177			0.5858
ABplappapp	WT_Sample3	177			0.5418
ABplpppapaa	WT_Sample3	177			0.6047
ABplpppapap	WT_Sample3	177			0.6047		0.6605
ABprpaaaapa	WT_Sample3	177			0.5494
ABprpaaaapp	WT_Sample3	177			0.5494
ABprpaapppa	WT_Sample3	177			0.4886
ABprpaapppp	WT_Sample3	177			0.4886
ABprpppaaaa	WT_Sample3	177			0.4825
Caaapp	WT_Sample3	177			0.8105		0.8749
Cpaaaa	WT_Sample3	177			0.7913		0.4973
Cpapaa	WT_Sample3	177			0.8806		0.8344
Cpapap	WT_Sample3	177			0.8806		0.9298
Cpappd	WT_Sample3	177			0.6342		0.6867
Cpappv	WT_Sample3	177			0.6342
Dappa	WT_Sample3	177			1.24
Dappp	WT_Sample3	177			1.24	3.3888	3.135
Dpppa	WT_Sample3	177			0.5818
Dpppp	WT_Sample3	177			0.5818		0.6972
Ealaa	WT_Sample3	177			0.485		0.9209
Ealap	WT_Sample3	177			0.485
Eplap	WT_Sample3	177			0.5362
MSaaappa	WT_Sample3	177			4.2507	10.7299	21.0488			1
MSaaappp	WT_Sample3	177			4.2507
ABalaaappll	WT_Sample3	178			0.5566
ABalaaapplr	WT_Sample3	178			0.5566					1
ABalpapaaaa	WT_Sample3	178			0.466
ABalpapaaap	WT_Sample3	178			0.466
ABalpappapa	WT_Sample3	178			0.5907
ABarpaapaa	WT_Sample3	178			0.6995
ABarpaapap	WT_Sample3	178			0.6995		0.9501
ABarpaappa	WT_Sample3	178			0.4658		0.5008
ABarpaappp	WT_Sample3	178			0.4658
ABarpapapa	WT_Sample3	178			0.5357
ABarpapapp	WT_Sample3	178			0.5357		0.8583
ABarpappap	WT_Sample3	178			0.5387
ABarpapppa	WT_Sample3	178			0.5401
ABarpapppp	WT_Sample3	178			0.5401		0.5246
ABarppaaaa	WT_Sample3	178			0.4564
ABarppaaap	WT_Sample3	178			0.4564		0.5799
ABarppaapa	WT_Sample3	178			0.5531		0.8544
ABarppaapp	WT_Sample3	178			0.5531
ABarpppapa	WT_Sample3	178			0.6131		0.8745
ABarpppapp	WT_Sample3	178			0.6131
ABplaaapaa	WT_Sample3	178			0.467
ABplaaapap	WT_Sample3	178			0.467
ABplaaappa	WT_Sample3	178			0.4679		0.4917
ABplaaappp	WT_Sample3	178			0.4679
ABplappapa	WT_Sample3	178			0.466
ABplappapp	WT_Sample3	178			0.466
ABplpppapaa	WT_Sample3	178			0.6588
ABplpppapap	WT_Sample3	178			0.6588		0.7107
ABprpaaaapa	WT_Sample3	178			0.5977
ABprpaaaapp	WT_Sample3	178			0.5977		0.6261
Caaaap	WT_Sample3	178			0.8362
Caaapp	WT_Sample3	178			0.857		0.9067
Cpaaaa	WT_Sample3	178			0.7868
Cpaapa	WT_Sample3	178			0.9319
Cpaapp	WT_Sample3	178			0.9319		0.9301
Cpapaa	WT_Sample3	178			0.5985
Cpapap	WT_Sample3	178			0.5985		0.7897
Cpappd	WT_Sample3	178			0.6824		0.7189
Cpappv	WT_Sample3	178			0.6824		0.5458
Dpppa	WT_Sample3	178			0.5779
Dpppp	WT_Sample3	178			0.5779		0.6859
Eplaa	WT_Sample3	178			0.5671	1.607	0.9672
Eplap	WT_Sample3	178			0.5671
Epraa	WT_Sample3	178			0.6815		1.8586
Eprap	WT_Sample3	178			0.6815		0.6883
MSaaappa	WT_Sample3	178			1.9347	6.0657	10.3189			1
MSaaappp	WT_Sample3	178			1.9347
ABalaaappll	WT_Sample3	179			0.5805
ABalaaapplr	WT_Sample3	179			0.5805					1
ABalaapaapp	WT_Sample3	179			0.6046
ABalpaapppa	WT_Sample3	179			0.4568
ABalpaapppp	WT_Sample3	179			0.4568
ABaraappapa	WT_Sample3	179			0.4569		2.4341
ABaraappapp	WT_Sample3	179			0.4569
ABarpaaaaar	WT_Sample3	179			0.5495
ABarpapapa	WT_Sample3	179			0.5352
ABarpapapp	WT_Sample3	179			0.5352		0.8769
ABarpappap	WT_Sample3	179			0.4594
ABarpapppa	WT_Sample3	179			0.4917
ABarpapppp	WT_Sample3	179			0.4917
ABarppaaaa	WT_Sample3	179			0.6354
ABarppaaap	WT_Sample3	179			0.6354		0.8041
ABarppaapa	WT_Sample3	179			0.5803		0.8036
ABarppaapp	WT_Sample3	179			0.5803
ABarpppaaa	WT_Sample3	179			0.5733
ABarpppaap	WT_Sample3	179			0.5733		0.6635
ABarpppapp	WT_Sample3	179			0.5533		0.7417
[truncated: 2,087 more rows]

## Sheet: WT_Sample4
Cell identity c	Embryo sample j	Time point T	Segmentation failure (1) or not (empty)	Quality failure (value) or not (empty)						Manually annotated apoptotic cell (1) or not (empty)
				V (μm3)	CPR	VIR	VVR	SR	FRL
Earap	WT_Sample4	205		2.5777		1.0323	0.9817
Eprpp	WT_Sample4	201		2.846	0.5124	1.0241	0.98
Cpaaa	WT_Sample4	98		4.2049	0.5313		0.972
Dppp	WT_Sample4	135		3.2368		1.02	0.9779
MSpaapp	WT_Sample4	128		2.741			0.8121			1
MSpaapp	WT_Sample4	129		2.6477			0.8185			1
MSpaapp	WT_Sample4	130		2.5369			0.8261			1
MSpaapp	WT_Sample4	131		2.9976			0.7945			1
MSpaapp	WT_Sample4	132		2.9043			0.8009			1
MSpaapp	WT_Sample4	133		2.7177			0.8137			1
MSpaapp	WT_Sample4	134		2.4203			0.8341			1
MSpaapp	WT_Sample4	135		2.2745			0.8441			1
MSpaapp	WT_Sample4	136		2.2745			0.8441			1
MSpaapp	WT_Sample4	137		2.3153			0.8413			1
Caaaaa	WT_Sample4	175		3.0385	0.8034		0.737
Caaaaa	WT_Sample4	183		2.4961	0.9588		0.7839
Caaaaa	WT_Sample4	187		3.3184	0.9573		0.7128
Caaaaa	WT_Sample4	188		4.5256	0.9278	2.5482	0.6083
Caaaaa	WT_Sample4	190		3.8083	0.938		0.6704
Caaaaa	WT_Sample4	191		2.7177	0.9589		0.7648
Caaaaa	WT_Sample4	192		3.4525	0.9572		0.7012
Caaaaa	WT_Sample4	193		3.3009	0.9587		0.7143
Caaaaa	WT_Sample4	194		2.6594	0.9494		0.7698
Caaaaa	WT_Sample4	195		4.234	0.9281		0.6335
Caaaaa	WT_Sample4	196		4.1582	0.9409		0.6401
Caaaaa	WT_Sample4	198		4.2165	0.929		0.635
Caaaaa	WT_Sample4	199		2.4961	0.9552	0.7365	0.7839
Caaaaa	WT_Sample4	201		2.4903	0.9548		0.7845
Caaaaa	WT_Sample4	202		2.8344	0.9543	4.0999	0.7547
Caaaaa	WT_Sample4	204		2.8285	0.8107	5.8657	0.7552
Caaaaa	WT_Sample4	206		2.5194	0.9655		0.7819
Caaaaa	WT_Sample4	207		2.2745	0.963		0.8031
Caaaaa	WT_Sample4	208		2.4436	0.9666		0.7885
Caaaaa	WT_Sample4	209		2.3795	0.9635		0.794
Caaaaa	WT_Sample4	210		4.409	0.9418		0.6184
Caaaaa	WT_Sample4	212		4.5081	0.938		0.6098
Caaaaa	WT_Sample4	213		3.6858	0.9226	14.9319	0.681
Caaaaa	WT_Sample4	216		4.3273	0.9429		0.6254
Caaaaa	WT_Sample4	217		3.6567	0.9457		0.6835
Caaaaa	WT_Sample4	218		2.9743	0.9552		0.7426
Caaaaa	WT_Sample4	219		3.3476	0.951		0.7102
Caaaaa	WT_Sample4	220		4.4265	0.9461		0.6169
Caaaap	WT_Sample4	181		3.8433	0.9272		0.7849
Caaaap	WT_Sample4	182		3.645	0.9255		0.796
Caaaap	WT_Sample4	183		4.0299	0.9588		0.7744
Caaaap	WT_Sample4	184		3.5342	0.9395		0.8022
Caaaap	WT_Sample4	185		4.1582	0.9403		0.7672
Caaaap	WT_Sample4	187		3.4584	0.9573		0.8064
Caaaap	WT_Sample4	189		4.3798	0.7582		0.7548
Caaaap	WT_Sample4	191		3.7966	0.9589		0.7875
Caaaap	WT_Sample4	192		3.3359	0.9572		0.8133
Caaaap	WT_Sample4	193		3.2543	0.9587		0.8178
Caaaap	WT_Sample4	197		3.6217	0.9434		0.7973
Caaaap	WT_Sample4	202		4.4148	0.9543		0.7529
Caaaap	WT_Sample4	203		3.1551	0.6635	1.3451	0.8234
Caaaap	WT_Sample4	205		4.1407	0.5287		0.7682
Caaaap	WT_Sample4	206		2.951	0.9655		0.8348
Caaaap	WT_Sample4	207		3.5925	0.963		0.7989
Caaaap	WT_Sample4	208		2.8577	0.9666		0.84
Caaaap	WT_Sample4	209		3.4059	0.9635		0.8093
Caaaap	WT_Sample4	218		4.1291	0.9552		0.7689
Caaaap	WT_Sample4	219		4.4148	0.951		0.7529
Caaaap	WT_Sample4	220		4.1232	0.9461		0.7692
Caaapa	WT_Sample4	198		2.9685	0.8697		0.8034
Caaapa	WT_Sample4	199		3.6392	0.9417		0.7589
Caaapa	WT_Sample4	205		3.9541	0.9475		0.7381
Caaapa	WT_Sample4	206		3.2134	0.961		0.7871
Caaapa	WT_Sample4	207		3.1668	0.9449		0.7902
Caaapa	WT_Sample4	208		3.5284	0.9436		0.7663
Caaapa	WT_Sample4	209		2.6186	0.954		0.8265
Caaapa	WT_Sample4	210		2.7177	0.9499		0.82
Caaapa	WT_Sample4	211		2.7235	0.9489		0.8196
Caaapa	WT_Sample4	212		2.7644	0.9426		0.8169
Caaapa	WT_Sample4	213		3.9483	0.9298		0.7385
Caaapa	WT_Sample4	214		3.9833	0.9384		0.7361
Caaapa	WT_Sample4	215		3.8783	0.941		0.7431
Caaapa	WT_Sample4	216		3.3942	0.9517		0.7752
Caaapa	WT_Sample4	217		4.3157	0.9468		0.7141
Caaapa	WT_Sample4	219		4.0824	0.9551		0.7296
Caaapa	WT_Sample4	220		4.4731	0.9408		0.7037
Caaapp	WT_Sample4	185		4.1407	0.9268		0.9432
Caaapp	WT_Sample4	187		4.2165	0.9248		0.9422
Caaapp	WT_Sample4	204		3.575	0.9265		0.951
Caaapp	WT_Sample4	206		3.6858	0.961		0.9495
Caaapp	WT_Sample4	218		3.2659	0.9537		0.9552
Caaapp	WT_Sample4	219		3.8666	0.9551		0.947
Caapap	WT_Sample4	212		3.0443	0.462		0.7162			1
Caapap	WT_Sample4	213		3.68	0.558		0.6569			1
Caapap	WT_Sample4	215		2.8693			0.7325			1
Caapap	WT_Sample4	216		2.4553			0.7711			1
Caapap	WT_Sample4	217		3.0268			0.7178			1
Caapap	WT_Sample4	218		2.7819	0.4598		0.7406			1
Caapap	WT_Sample4	219		2.6711			0.751			1
Caapap	WT_Sample4	220		2.4436			0.7722			1
Caappd	WT_Sample4	191		3.6333	0.8349		0.9102
Caappd	WT_Sample4	193		2.2045	0.8265		0.9455
Caappv	WT_Sample4	146		3.9658
Caappv	WT_Sample4	147		2.9802			0.572
Caappv	WT_Sample4	148		3.5459			0.4908
Caappv	WT_Sample4	149		4.374
Caappv	WT_Sample4	162		3.645
Caappv	WT_Sample4	163		4.0766
Caappv	WT_Sample4	164		4.3915
Caappv	WT_Sample4	165		3.645
Caappv	WT_Sample4	168		3.1726			0.5444
Caappv	WT_Sample4	171		3.7033
Caappv	WT_Sample4	173		2.741			0.6064
Caappv	WT_Sample4	174		2.6711			0.6164
Caappv	WT_Sample4	175		3.3476			0.5193
Caappv	WT_Sample4	176		4.0532
Caappv	WT_Sample4	177		4.0649
Caappv	WT_Sample4	179		4.0066
Caappv	WT_Sample4	182		4.2457
Cpaaaa	WT_Sample4	202		2.8227	0.9589		0.9201
Cpaaaa	WT_Sample4	206		3.1026	0.947		0.9121
Cpaaaa	WT_Sample4	207		3.2484	0.953		0.908
Cpaaaa	WT_Sample4	220		4.4848	0.9038		0.873
Cpaaap	WT_Sample4	184		4.2632	0.9098		0.8115
Cpaaap	WT_Sample4	187		2.951	0.9034		0.8695
Cpaaap	WT_Sample4	188		2.2745	0.9364		0.8994
Cpaaap	WT_Sample4	189		2.846	0.9256		0.8742
Cpaaap	WT_Sample4	190		4.0707	0.9372		0.82
Cpaaap	WT_Sample4	192		2.6594	1.6818		0.8824
Cpaaap	WT_Sample4	194		3.6567	0.9423		0.8383
Cpaaap	WT_Sample4	195		4.3448	0.9316		0.8079
Cpaaap	WT_Sample4	196		3.0326	0.9291		0.8659
Cpaaap	WT_Sample4	202		3.3417	0.9589		0.8522
Cpaaap	WT_Sample4	207		3.8025	0.953		0.8319
Cpaaap	WT_Sample4	210		3.82	2.913		0.8311
Cpaaap	WT_Sample4	214		4.479	1.1901		0.802
Cpaaap	WT_Sample4	215		4.4673	0.9337		0.8025
Cpaaap	WT_Sample4	217		4.0066	0.9269		0.8228
Cpaapa	WT_Sample4	172		4.0416	0.889		0.6528
Cpaapa	WT_Sample4	187		4.2749	0.636		0.6328
Cpaapa	WT_Sample4	190		4.3565	0.6665		0.6258
Cpaapa	WT_Sample4	191		4.1057	0.647		0.6473
Cpaapa	WT_Sample4	192		4.3273	0.68		0.6283
Cpaapa	WT_Sample4	193		3.8025	0.6774		0.6733
Cpaapa	WT_Sample4	194		2.8693	0.8801		0.7535
Cpaapa	WT_Sample4	195		2.7702	0.8852		0.762
Cpaapa	WT_Sample4	196		3.3067	0.8949		0.7159
Cpaapa	WT_Sample4	199		2.7527	0.9444		0.7635
Cpaapa	WT_Sample4	202		4.4323	0.9315		0.6192
Cpaapa	WT_Sample4	203		2.9277	0.9487		0.7485
Cpaapa	WT_Sample4	204		3.9833	0.942		0.6578
Cpaapa	WT_Sample4	207		4.4323	0.9283		0.6192
Cpaapa	WT_Sample4	210		2.8868	0.937		0.752
Cpaapa	WT_Sample4	211		2.951	0.9442		0.7465
Cpaapa	WT_Sample4	212		3.0968	0.9385		0.734
Cpaapa	WT_Sample4	213		4.0766	0.9387		0.6498
Cpaapa	WT_Sample4	214		4.4848	0.9223		0.6147
Cpaapa	WT_Sample4	216		3.5459	0.9274		0.6954
Cpaapa	WT_Sample4	217		2.8868	0.9388		0.752
Cpaapa	WT_Sample4	218		4.1815	0.918		0.6408
Cpaapa	WT_Sample4	219		3.1434	0.9404		0.73
Cpaapa	WT_Sample4	220		4.0299	0.8886		0.6538
Cpaapp	WT_Sample4	199		3.9249	0.9444		0.8976
Cpaapp	WT_Sample4	201		4.3507	0.8896		0.8865
Cpaapp	WT_Sample4	202		3.7966	0.9315		0.9009
Cpaapp	WT_Sample4	203		3.2426	0.9487		0.9154
Cpaapp	WT_Sample4	204		2.986	0.942		0.9221
Cpaapp	WT_Sample4	205		4.0066	0.8833		0.8955
Cpaapp	WT_Sample4	206		4.2924	0.6823		0.888
Cpaapp	WT_Sample4	207		4.1874	0.9283		0.8907
Cpaapp	WT_Sample4	208		4.2224	0.92		0.8898
Cpaapp	WT_Sample4	209		4.1407	0.9262		0.892
Cpaapp	WT_Sample4	211		3.7616	0.9442		0.9019
Cpaapp	WT_Sample4	212		4.2982	0.9385		0.8879
Cpaapp	WT_Sample4	213		3.2951	0.9387		0.914
Cpaapp	WT_Sample4	217		4.4673	0.9388		0.8834
Cpaapp	WT_Sample4	219		4.0182	0.9404		0.8952
Cpapaa	WT_Sample4	182		2.3678	0.6523		0.9648
Cpapap	WT_Sample4	188		3.0326	0.758		0.9556
Cpappd	WT_Sample4	203		3.9133	0.7518		0.9186
Cpappv	WT_Sample4	219		3.0268	0.66	0.9801	0.8932
Dappa	WT_Sample4	210		3.0676	0.8607	0.6801	0.9585
ABalaapapa	WT_Sample4	148		2.5836			0.6053			1
ABalaapapa	WT_Sample4	149		2.5311			0.6134			1
ABalaapapa	WT_Sample4	150		2.3736			0.6374			1
ABalaapapa	WT_Sample4	151		2.9627			0.5474			1
ABalaapapa	WT_Sample4	152		2.5253			0.6143			1
ABalaapapa	WT_Sample4	154		2.5136			0.616			1
ABalaapapa	WT_Sample4	155		3.4467						1
ABalaapapa	WT_Sample4	156		3.3534			0.4878			1
ABalaapapa	WT_Sample4	157		2.7935			0.5733			1
ABalaapapa	WT_Sample4	158		2.3795			0.6365			1
ABalaapapa	WT_Sample4	159		2.6069			0.6018			1
ABalaapapa	WT_Sample4	160		2.6652			0.5929			1
ABalaapapa	WT_Sample4	161		2.4319			0.6285			1
ABalaappaa	WT_Sample4	151		4.2165			0.589			1
ABalaappaa	WT_Sample4	152		3.2426			0.6839			1
ABalaappaa	WT_Sample4	153		2.7644			0.7305			1
ABalaappaa	WT_Sample4	154		2.5369			0.7527			1
ABalaappaa	WT_Sample4	155		2.706			0.7362			1
ABalaappaa	WT_Sample4	156		3.2251			0.6856			1
ABalaappaa	WT_Sample4	157		3.6158			0.6475			1
ABalaappaa	WT_Sample4	158		3.4409			0.6646			1
ABalaappaa	WT_Sample4	159		2.7644			0.7305			1
ABalaappaa	WT_Sample4	161		3.2601			0.6822			1
ABalaappaa	WT_Sample4	162		3.2251			0.6856			1
ABalaappaa	WT_Sample4	163		3.715			0.6379			1
ABalapapaa	WT_Sample4	159		4.3215						1
ABalapapaa	WT_Sample4	160		3.9424						1
ABalapapaa	WT_Sample4	161		3.1726						1
ABalapapaa	WT_Sample4	162		3.2659						1
ABalapapaa	WT_Sample4	163		3.8316						1
ABalapapaa	WT_Sample4	164		3.4584						1
ABalapapaa	WT_Sample4	165		3.5634						1
ABalapapaa	WT_Sample4	166		3.4992						1
ABalapapaa	WT_Sample4	167		3.3067						1
ABalapapaa	WT_Sample4	169		3.0093						1
ABalapapaa	WT_Sample4	170		2.881						1
ABalapapaa	WT_Sample4	171		2.9743						1
ABalapapaa	WT_Sample4	172		3.3767						1
ABalapapaa	WT_Sample4	173		3.056						1
ABalapapaa	WT_Sample4	174		3.2543						1
ABalapapaa	WT_Sample4	175		3.4117						1
ABalappaaa	WT_Sample4	147		4.2632						1
ABalappaaa	WT_Sample4	148		3.5867						1
ABalappaaa	WT_Sample4	151		2.5311			0.541			1
ABalappaaa	WT_Sample4	152		2.6886			0.5124			1
ABalappaaa	WT_Sample4	154		2.8577						1
ABalappaaa	WT_Sample4	155		2.9218						1
ABalappaaa	WT_Sample4	156		2.7235			0.5061			1
ABalappaaa	WT_Sample4	157		2.8985						1
ABalappaaa	WT_Sample4	159		2.7002			0.5103			1
ABalappaaa	WT_Sample4	160		3.0618						1
ABalappaaa	WT_Sample4	161		2.6827			0.5135			1
ABalppaaaa	WT_Sample4	145		3.0676						1
ABalppaaaa	WT_Sample4	146		2.9452						1
ABalppaaaa	WT_Sample4	147		2.5836						1
ABalppaaaa	WT_Sample4	148		2.3736						1
ABalppaaaa	WT_Sample4	149		2.6711						1
ABalppaaaa	WT_Sample4	150		2.6594						1
ABalppaaaa	WT_Sample4	151		2.4611						1
ABalppaaaa	WT_Sample4	152		2.916						1
ABalppaaaa	WT_Sample4	153		2.4553						1
ABalppaaaa	WT_Sample4	154		3.2193						1
ABalppaaaa	WT_Sample4	155		3.1143						1
ABalppaaaa	WT_Sample4	156		3.7092						1
ABalppaaaa	WT_Sample4	157		3.2309						1
ABalppaaaa	WT_Sample4	158		3.3009						1
ABalppaaaa	WT_Sample4	159		2.9043						1
ABalppaaaa	WT_Sample4	160		2.6477						1
ABalppaaaa	WT_Sample4	161		2.6477						1
ABalppaaaa	WT_Sample4	162		2.9627						1
ABalppaaaa	WT_Sample4	163		3.0035						1
ABalppaapa	WT_Sample4	145		2.9743						1
ABalppaapa	WT_Sample4	146		2.5311						1
ABalppaapa	WT_Sample4	147		2.4553						1
ABalppaapa	WT_Sample4	148		2.4028						1
ABalppaapa	WT_Sample4	149		2.4086						1
ABalppaapa	WT_Sample4	150		2.3853						1
ABalppaapa	WT_Sample4	151		2.3153						1
ABalppaapa	WT_Sample4	152		2.6594						1
ABalppaapa	WT_Sample4	153		2.5602						1
ABalppaapa	WT_Sample4	154		2.5661						1
ABalppaapa	WT_Sample4	155		2.6361						1
ABalppaapa	WT_Sample4	156		2.3095						1
ABalppaapa	WT_Sample4	157		2.4378						1
ABalppaapa	WT_Sample4	158		2.327						1
ABalppaapa	WT_Sample4	159		2.5777						1
ABalppaapa	WT_Sample4	160		2.3386						1
ABalppaapa	WT_Sample4	161		2.4144						1
ABalppaapa	WT_Sample4	162		2.6652						1
ABalppaapa	WT_Sample4	163		2.7002						1
ABalppaapa	WT_Sample4	164		2.6244						1
ABalppaapa	WT_Sample4	165		2.4844						1
ABalppaapa	WT_Sample4	166		2.3386						1
ABalppaapa	WT_Sample4	167		2.3328						1
ABalppaapa	WT_Sample4	168		2.4553						1
ABalppaapa	WT_Sample4	169		2.3386						1
ABalppapap	WT_Sample4	147		2.1228	0.4727		0.9223
ABaraaaapp	WT_Sample4	173		2.5019						1
ABaraaaapp	WT_Sample4	174		3.7266						1
ABaraaaapp	WT_Sample4	175		3.3242						1
ABaraaaapp	WT_Sample4	176		2.9218						1
ABaraaaapp	WT_Sample4	177		3.1493						1
ABaraaaapp	WT_Sample4	178		2.706						1
ABaraaaapp	WT_Sample4	179		3.8433						1
ABaraaaapp	WT_Sample4	180		3.4292						1
ABaraaaapp	WT_Sample4	181		3.2193						1
ABaraaaapp	WT_Sample4	182		2.5078						1
ABaraaaapp	WT_Sample4	183		2.6477						1
ABaraaaapp	WT_Sample4	184		2.8402						1
ABaraaaapp	WT_Sample4	185		3.0268						1
ABaraaaapp	WT_Sample4	186		2.6536						1
ABaraaaapp	WT_Sample4	187		2.6711						1
ABaraaaapp	WT_Sample4	188		2.4203						1
ABaraaaapp	WT_Sample4	189		2.3445						1
ABaraaaapp	WT_Sample4	190		2.4494						1
ABaraaaapp	WT_Sample4	191		2.5777						1
ABaraaaapp	WT_Sample4	192		2.0704						1
ABaraaaapp	WT_Sample4	193		2.5369						1
ABaraaaapp	WT_Sample4	194		2.2337						1
ABaraaaapp	WT_Sample4	195		2.5428						1
ABaraaaapp	WT_Sample4	196		2.327						1
ABaraaaapp	WT_Sample4	197		2.4378						1
ABaraaaapp	WT_Sample4	198		2.5602						1
ABaraaaapp	WT_Sample4	199		2.3795						1
ABaraaaapp	WT_Sample4	200		2.6127						1
ABaraaaapp	WT_Sample4	201		2.5194						1
ABaraaaapp	WT_Sample4	202		2.4961						1
ABaraaaapp	WT_Sample4	203		2.3853						1
ABaraaaapp	WT_Sample4	204		2.6711						1
ABaraaaapp	WT_Sample4	205		2.5253						1
ABaraaaapp	WT_Sample4	206		2.4611						1
ABaraaaapp	WT_Sample4	207		2.4611						1
ABaraaaapp	WT_Sample4	208		2.5777						1
ABaraaaapp	WT_Sample4	209		2.5428						1
ABaraaaapp	WT_Sample4	210		2.6302						1
ABaraaaapp	WT_Sample4	211		2.6011						1
ABaraaaapp	WT_Sample4	212		2.4319						1
ABaraaaapp	WT_Sample4	213		2.4144						1
ABaraaaapp	WT_Sample4	214		2.5253						1
ABaraaaapp	WT_Sample4	215		2.5544						1
ABaraaaapp	WT_Sample4	216		2.5078						1
ABaraaaapp	WT_Sample4	217		2.292						1
ABaraaaapp	WT_Sample4	218		2.6127						1
ABaraaaapp	WT_Sample4	219		2.2978						1
ABaraaaapp	WT_Sample4	220		2.2745						1
ABarappaaa	WT_Sample4	167		2.9393	0.5039		0.8543
ABarpaaapp	WT_Sample4	167		4.4323			0.6686			1
ABarpaaapp	WT_Sample4	173		2.6244			0.8038			1
ABarpaaapp	WT_Sample4	175		3.3709			0.7479			1
ABarpaaapp	WT_Sample4	181		3.9191			0.7069			1
ABarpaaapp	WT_Sample4	182		3.6917			0.7239			1
ABarpaaapp	WT_Sample4	183		3.2834			0.7545			1
ABarpaaapp	WT_Sample4	184		3.0735			0.7702			1
ABarpaaapp	WT_Sample4	185		2.6127			0.8046			1
ABarpaaapp	WT_Sample4	186		2.7177	0.4578		0.7968			1
ABarpaaapp	WT_Sample4	187		2.7527			0.7942			1
ABarpaaapp	WT_Sample4	188		2.9043			0.7828			1
ABarpaaapp	WT_Sample4	189		2.3036			0.8277			1
ABarpaaapp	WT_Sample4	190		2.1812			0.8369			1
ABarpaaapp	WT_Sample4	191		2.2628			0.8308			1
ABarpaaapp	WT_Sample4	192		2.3036			0.8277			1
ABarpaaapp	WT_Sample4	193		2.2512			0.8317			1
ABarpaaapp	WT_Sample4	194		2.2686			0.8304			1
ABarpaaapp	WT_Sample4	195		2.4319			0.8181			1
ABarpaapaa	WT_Sample4	197		3.7908	0.8839	1.3227	0.9081
ABarpaapaa	WT_Sample4	199		3.8724			0.9061
ABarpaapap	WT_Sample4	190		3.021			0.9572
ABarpaapap	WT_Sample4	193		3.6333	0.6213	0.9591	0.9485
ABarpaappa	WT_Sample4	182		4.2632	0.5762		0.9335
ABarpaappa	WT_Sample4	183		2.811	0.6529	1.3969	0.9562
ABarpaappa	WT_Sample4	198		2.9452	0.5954		0.9541
ABarpaappa	WT_Sample4	213		3.056	0.7423		0.9524
ABarpapapa	WT_Sample4	190		2.4669		0.732	0.9305
ABarpapppa	WT_Sample4	167		3.2426		0.6837	0.9097
ABarpapppa	WT_Sample4	182		3.61			0.8995
ABarpapppa	WT_Sample4	183		3.7908			0.8945
ABarpapppa	WT_Sample4	190		2.706	0.5865	0.7282	0.9247
ABarpapppp	WT_Sample4	180		2.741			0.9607
ABarpapppp	WT_Sample4	203		4.3915	0.7801		0.937
ABarpapppp	WT_Sample4	210		3.0501	0.692		0.9563
ABarppaapa	WT_Sample4	181		2.916	0.6827	0.9216	0.9216
ABarppaapa	WT_Sample4	186		3.9541	0.7022		0.8936
ABarppaapa	WT_Sample4	187		4.2632	0.6971		0.8853
ABarppaapa	WT_Sample4	198		3.7266	0.6905		0.8998
ABarppaapa	WT_Sample4	201		3.9774	0.6954		0.893
ABarppaapa	WT_Sample4	203		4.0532	0.702		0.891
ABarpppapa	WT_Sample4	195		2.9452	0.6097		0.948
ABplaaaapa	WT_Sample4	201		3.0268		0.9032	0.9304
ABplaaapap	WT_Sample4	209		3.3651	0.8122		0.8867
ABplaaappa	WT_Sample4	207		3.5225	0.8764		0.9197
ABplaaappa	WT_Sample4	212		3.8433	0.8103		0.9124
ABplaapaap	WT_Sample4	161		2.4494	0.8434		0.9331
ABplaappaa	WT_Sample4	198		2.4611			0.8552
ABplaappaa	WT_Sample4	207		3.2659			0.8079
ABplaappaa	WT_Sample4	210		4.3623			0.7434
ABplappapa	WT_Sample4	213		2.3561	0.4905		0.9533
ABplappapa	WT_Sample4	214		2.7235	0.507		0.946
ABplpappap	WT_Sample4	145		4.5198		1.0063				1
ABplpappap	WT_Sample4	147		4.0882						1
ABplpappap	WT_Sample4	153		3.0035						1
ABplpappap	WT_Sample4	154		2.7294						1
ABplpappap	WT_Sample4	155		2.7294						1
ABplpappap	WT_Sample4	156		2.362			0.5342			1
ABplpappap	WT_Sample4	157		2.6944						1
ABplpappap	WT_Sample4	158		2.7994						1
ABplpappap	WT_Sample4	159		3.0443						1
ABplpappap	WT_Sample4	160		2.5369			0.4997			1
ABplpappap	WT_Sample4	161		3.2543						1
ABplpappap	WT_Sample4	162		2.741						1
ABplpappap	WT_Sample4	163		2.2045			0.5653			1
ABplpappap	WT_Sample4	164		2.2686			0.5526			1
ABplpappap	WT_Sample4	165		2.2278			0.5607			1
ABplpappap	WT_Sample4	166		2.4144			0.5239			1
ABplpappap	WT_Sample4	167		2.3853			0.5296			1
ABplpappap	WT_Sample4	168		2.327			0.5411			1
ABplpappap	WT_Sample4	169		2.187			0.5687			1
ABplpappap	WT_Sample4	170		2.327			0.5411			1
ABplpappap	WT_Sample4	171		2.1578			0.5745			1
ABplpappap	WT_Sample4	172		2.2861			0.5492			1
ABplpappap	WT_Sample4	173		2.222			0.5618			1
ABplpappap	WT_Sample4	174		2.2045			0.5653			1
ABplppaaap	WT_Sample4	151		2.5253			0.6208			1
ABplppaaap	WT_Sample4	152		2.9568			0.556			1
ABplppaaap	WT_Sample4	153		2.8752			0.5683			1
ABplppaaap	WT_Sample4	154		2.4844			0.627			1
ABplppaaap	WT_Sample4	155		2.6361			0.6042			1
ABplppaaap	WT_Sample4	156		2.5311			0.62			1
ABplppaaap	WT_Sample4	157		2.397			0.6401			1
ABplppaaap	WT_Sample4	158		4.2865						1
ABplppaaap	WT_Sample4	159		2.7935			0.5806			1
ABplppaaap	WT_Sample4	160		2.6011			0.6095			1
ABplppaaap	WT_Sample4	161		2.6069			0.6086			1
ABplppaaap	WT_Sample4	162		2.8285			0.5753			1
ABplppaaap	WT_Sample4	163		2.6244			0.606			1
ABplpppapp	WT_Sample4	150		3.8316			0.6189			1
ABplpppapp	WT_Sample4	151		3.1085			0.6908			1
ABplpppapp	WT_Sample4	152		3.7033			0.6317			1
ABplpppapp	WT_Sample4	154		2.7702			0.7245			1
ABplpppapp	WT_Sample4	156		2.4028			0.761			1
ABplpppapp	WT_Sample4	157		2.3386			0.7674			1
ABplpppapp	WT_Sample4	158		2.1812			0.7831			1
ABplpppapp	WT_Sample4	159		4.304			0.5719			1
ABpraappaa	WT_Sample4	205		2.7294	0.4976		0.8345
ABpraappaa	WT_Sample4	206		2.3561	0.5026		0.8572
ABpraappaa	WT_Sample4	207		2.2803			0.8618
ABpraappaa	WT_Sample4	208		2.2337	0.4734		0.8646
ABpraappaa	WT_Sample4	209		3.9366	0.4998		0.7614
ABpraappap	WT_Sample4	216		4.374	0.8438		0.9016
ABpraappap	WT_Sample4	217		2.986	0.8757		0.9328
ABpraappap	WT_Sample4	219		3.7558	0.878		0.9155
ABpraappap	WT_Sample4	220		3.8375	0.8824		0.9137
ABpraapppa	WT_Sample4	217		2.257	0.641		0.9665
ABpraapppa	WT_Sample4	220		2.2453	0.6702		0.9666
ABprapaapa	WT_Sample4	214		3.8724			0.7954
ABprapaapa	WT_Sample4	215		3.9716			0.7901
ABprapaapa	WT_Sample4	217		3.3359			0.8237
ABprapaapa	WT_Sample4	220		4.479			0.7633
ABprppaaap	WT_Sample4	140		4.374						1
ABprppaaap	WT_Sample4	152		3.2076			0.5094			1
ABprppaaap	WT_Sample4	153		2.9102		0.9848	0.5549			1
ABprppaaap	WT_Sample4	155		2.2395			0.6574			1
ABprppaaap	WT_Sample4	156		2.5486			0.6102			1
ABprppaaap	WT_Sample4	157		2.3328			0.6432			1
ABprppaaap	WT_Sample4	158		2.4786		2.8011	0.6209			1
ABprppappp	WT_Sample4	174		3.7733	0.5374	0.8076	0.8789
ABprpppapp	WT_Sample4	145		3.6858						1
ABprpppapp	WT_Sample4	146		2.5194			0.6397			1
ABprpppapp	WT_Sample4	147		2.5602			0.6339			1
ABprpppapp	WT_Sample4	148		2.3795			0.6597			1
ABprpppapp	WT_Sample4	149		2.4961			0.643			1
ABprpppapp	WT_Sample4	150		2.4786			0.6455			1
ABprpppapp	WT_Sample4	151		2.7877			0.6013			1
ABprpppapp	WT_Sample4	152		2.4319			0.6522			1
ABprpppapp	WT_Sample4	153		2.3211			0.6681			1
ABprpppapp	WT_Sample4	154		2.4203			0.6539			1
ABprpppapp	WT_Sample4	155		2.257			0.6772			1
ABprpppapp	WT_Sample4	156		2.7527			0.6063			1
ABprpppapp	WT_Sample4	157		2.6827			0.6163			1
MSaaappa	WT_Sample4	176		2.6419						1
MSaaappa	WT_Sample4	177		3.126						1
MSaaappa	WT_Sample4	178		3.7675		2.4505				1
MSaaappa	WT_Sample4	180		4.0182						1
MSaaappa	WT_Sample4	182		3.9833						1
MSaaappa	WT_Sample4	183		3.6742						1
MSaaappa	WT_Sample4	184		2.9218						1
MSaaappa	WT_Sample4	185		2.9743						1
MSaaappa	WT_Sample4	186		3.5808						1
MSaaappa	WT_Sample4	187		2.7702						1
MSaaappa	WT_Sample4	188		2.7877						1
MSaaappa	WT_Sample4	189		2.3328			0.5232			1
MSaaappa	WT_Sample4	190		2.5369						1
MSaaappa	WT_Sample4	191		2.2745		0.7735	0.5352			1
MSaaappa	WT_Sample4	194		2.1812			0.5542			1
MSaaappa	WT_Sample4	195		2.2395			0.5423			1
MSaaappa	WT_Sample4	196		2.3328			0.5232			1
MSaaappa	WT_Sample4	197		2.222			0.5459			1
MSaaappa	WT_Sample4	198		2.6944						1
MSaaappa	WT_Sample4	199		2.3211			0.5256			1
MSaaappa	WT_Sample4	200		2.3736			0.5149			1
MSapaapa	WT_Sample4	171		3.505			0.6463			1
MSapaapa	WT_Sample4	172		4.1174			0.5845			1
MSapaapa	WT_Sample4	174		2.9918			0.6981			1
MSapaapa	WT_Sample4	175		3.2134			0.6757			1
MSapaapa	WT_Sample4	177		3.2776			0.6692			1
MSapaapa	WT_Sample4	180		4.5081			0.545			1
MSapaapa	WT_Sample4	181		3.1901			0.678			1
MSapaapa	WT_Sample4	182		2.6361			0.734			1
MSapaapa	WT_Sample4	183		2.6011		1.3008	0.7375			1
MSapaapa	WT_Sample4	185		3.1201			0.6851			1
MSapaapa	WT_Sample4	186		2.881			0.7092			1
MSapaapa	WT_Sample4	187		2.5428			0.7434			1
MSapaapa	WT_Sample4	188		2.2453			0.7734			1
MSappapa	WT_Sample4	172		3.715						1
MSappapa	WT_Sample4	175		3.61			0.4963			1
MSappapa	WT_Sample4	176		2.8402			0.6037			1
MSappapa	WT_Sample4	177		2.3853			0.6672			1
MSappapa	WT_Sample4	178		2.5602			0.6428			1
MSappapa	WT_Sample4	179		2.3211			0.6762			1
MSapppap	WT_Sample4	211		2.8285	0.5445		0.9167
MSapppap	WT_Sample4	215		3.2251	0.5575	1.0675	0.905
MSppaapa	WT_Sample4	169		2.7469			0.7036			1
MSppaapa	WT_Sample4	171		2.8868			0.6885			1
MSppaapa	WT_Sample4	172		4.0299			0.5651			1
MSppaapa	WT_Sample4	173		2.6711			0.7118			1
MSppaapa	WT_Sample4	176		4.1407		1.6463	0.5532			1
MSppaapa	WT_Sample4	179		2.4669			0.7338			1
MSppaapa	WT_Sample4	180		2.2045			0.7621			1
MSppaapa	WT_Sample4	181		2.4319			0.7376			1
MSppaapa	WT_Sample4	182		2.3678			0.7445			1
MSppaapa	WT_Sample4	183		2.2745		0.7986	0.7546			1
MSppaapa	WT_Sample4	185		2.5311			0.7269			1
MSpppapa	WT_Sample4	168		4.0299			0.6032			1
MSpppapa	WT_Sample4	169		2.6652						1
MSpppapa	WT_Sample4	170		2.4144						1
MSpppapa	WT_Sample4	171		2.4903						1
MSpppapa	WT_Sample4	172		2.5777						1
MSpppapa	WT_Sample4	173		2.4028						1
MSpppapa	WT_Sample4	174		2.3211						1
MSpppapa	WT_Sample4	175		2.3911						1
MSpppapa	WT_Sample4	176		2.4144						1
MSpppapa	WT_Sample4	177		2.2978						1
MSpppapa	WT_Sample4	178		2.6711						1
MSpppapa	WT_Sample4	179		3.4759						1
MSpppapa	WT_Sample4	180		2.5136						1
MSpppapa	WT_Sample4	181		2.1695						1
MSpppapa	WT_Sample4	182		2.327						1
MSpppapa	WT_Sample4	183		2.327						1
MSpppapa	WT_Sample4	184		2.4436						1
MSpppapa	WT_Sample4	185		2.2045						1
MSpppapa	WT_Sample4	186		2.257						1
MSpppapa	WT_Sample4	187		2.1287						1
MSpppapa	WT_Sample4	188		2.1637						1
MSpppapa	WT_Sample4	189		2.327						1
MSpppapp	WT_Sample4	167		2.2803	0.8263	1.0146	0.9473
MSppppap	WT_Sample4	219		3.2834			0.9183
Cappaap	WT_Sample4	208		3.5808			0.7065
ABalaaaalal	WT_Sample4	216		4.2807			0.6321
ABalaaaalal	WT_Sample4	217		3.7033			0.6817
ABalaaaalal	WT_Sample4	218		3.9658			0.6591
ABalaaaalal	WT_Sample4	219		3.0851			0.7348
ABalaaaalal	WT_Sample4	220		3.1201			0.7318
ABalaaaalpa	WT_Sample4	201		4.2107	0.4894					1
ABalaaaalpa	WT_Sample4	205		4.0357	0.6007					1
ABalaaaalpp	WT_Sample4	203		4.2515	0.6063	1.3657	0.5243
ABalaaaalpp	WT_Sample4	207		2.5661	0.6114		0.7129
ABalaaaarla	WT_Sample4	207		3.8375	0.4587		0.5838			1
ABalaaaarla	WT_Sample4	210		3.9366			0.5731			1
ABalaaaarra	WT_Sample4	198		4.2165			0.5019			1
ABalaaaparl	WT_Sample4	213		3.7441	0.6243		0.5276			1
ABalaaaparl	WT_Sample4	215		3.4934	0.5951		0.5592			1
ABalaaaparl	WT_Sample4	216		4.2982	0.6716					1
ABalaaaparr	WT_Sample4	204		4.3623	0.5473
ABalaaaparr	WT_Sample4	205		4.479	0.5763
ABalaaaparr	WT_Sample4	207		2.6011	0.6564		0.5558
ABalaaaparr	WT_Sample4	209		4.479	0.6119
ABalaaaparr	WT_Sample4	216		3.7558	0.6716
ABalaaappll	WT_Sample4	194		4.339
ABalaaappll	WT_Sample4	201		3.7558
ABalaaappll	WT_Sample4	202		3.2718	0.5158
ABalaaappll	WT_Sample4	203		3.9074	0.4595
ABalaaappll	WT_Sample4	204		2.8518
ABalaaappll	WT_Sample4	205		3.8491
ABalaaappll	WT_Sample4	206		4.1699
ABalaaappll	WT_Sample4	207		3.7441
ABalaaappll	WT_Sample4	208		2.7235	0.4818
ABalaaappll	WT_Sample4	209		3.3009
ABalaaappll	WT_Sample4	210		3.3826
ABalaaappll	WT_Sample4	211		3.4642	0.4669
ABalaaappll	WT_Sample4	212		2.8227
ABalaaappll	WT_Sample4	213		3.0268
ABalaaappll	WT_Sample4	214		3.0385	0.5127
ABalaaappll	WT_Sample4	215		3.1143	0.4716
ABalaaappll	WT_Sample4	218		2.8752		0.6805
ABalaapaapp	WT_Sample4	200		3.7966			0.5252
ABalaapappa	WT_Sample4	202		4.4965	0.6271		0.5086			1
ABalaapappa	WT_Sample4	203		4.0241	0.6449		0.5602			1
ABalaapappp	WT_Sample4	193		3.9774	0.6819		0.729
ABalaappapp	WT_Sample4	216		3.8025	0.6384		0.7442
ABalaapppap	WT_Sample4	202		3.8491						1
ABalaapppap	WT_Sample4	203		3.1434						1
ABalaapppap	WT_Sample4	204		3.3009	0.4997					1
ABalaapppap	WT_Sample4	205		3.3417						1
ABalaapppap	WT_Sample4	206		3.4001						1
ABalaapppap	WT_Sample4	207		3.5284						1
ABalaapppap	WT_Sample4	208		4.0357						1
ABalaapppap	WT_Sample4	209		4.1174	0.4865					1
ABalaapppap	WT_Sample4	210		4.1874	0.5644					1
ABalaapppap	WT_Sample4	214		3.4934						1
ABalaapppap	WT_Sample4	215		4.1116						1
ABalaapppap	WT_Sample4	216		3.9891	0.493					1
ABalaapppap	WT_Sample4	217		3.9891	0.4702					1
ABalaapppap	WT_Sample4	218		4.3448	0.5542					1
ABalaapppap	WT_Sample4	219		4.0766	0.6119					1
ABalappappp	WT_Sample4	197		3.3651			0.7746
ABalpaaaaaa	WT_Sample4	214		4.2457			0.7366
ABalpaaaapp	WT_Sample4	199		4.3682						1
ABalpaaaapp	WT_Sample4	200		2.6244			0.6275			1
ABalpaaaapp	WT_Sample4	201		2.5719			0.6349			1
ABalpaaaapp	WT_Sample4	202		2.5253			0.6416			1
ABalpaaaapp	WT_Sample4	203		2.6886			0.6184			1
ABalpaaaapp	WT_Sample4	204		2.5602			0.6366			1
ABalpaaaapp	WT_Sample4	205		2.4961			0.6457			1
ABalpaaaapp	WT_Sample4	206		2.6127			0.6291			1
ABalpaaaapp	WT_Sample4	207		2.7177			0.6142			1
ABalpaaaapp	WT_Sample4	208		2.4144			0.6573			1
ABalpaaaapp	WT_Sample4	209		2.3328			0.6689			1
ABalpaaaapp	WT_Sample4	210		2.3795			0.6623			1
ABalpaaaapp	WT_Sample4	211		2.6711			0.6209			1
ABalpaaaapp	WT_Sample4	212		2.5661			0.6358			1
ABalpaaaapp	WT_Sample4	213		2.4261			0.6556			1
ABalpaaaapp	WT_Sample4	214		2.362			0.6647			1
ABalpaaapap	WT_Sample4	199		2.9685	0.5448		0.7015			1
ABalpaaapap	WT_Sample4	200		2.811			0.7173			1
ABalpaaapap	WT_Sample4	201		2.8752			0.7109			1
ABalpaaapap	WT_Sample4	202		2.3328	0.4984		0.7654			1
ABalpaaapap	WT_Sample4	203		2.4028	0.5053		0.7584			1
ABalpaaapap	WT_Sample4	204		2.3211	0.4859		0.7666			1
ABalpaaapap	WT_Sample4	205		2.4611	0.5499		0.7525			1
ABalpaaapap	WT_Sample4	206		2.4436	0.5289		0.7543			1
ABalpaaapap	WT_Sample4	207		2.5019	0.575		0.7484			1
ABalpaaappa	WT_Sample4	200		3.4525	0.726		0.8437			1
ABalpaaappa	WT_Sample4	201		3.2951	0.7055		0.8508			1
ABalpaaappa	WT_Sample4	202		3.1668	0.7598		0.8566			1
ABalpaaappa	WT_Sample4	203		3.0676	0.7742		0.8611			1
ABalpaaappa	WT_Sample4	204		3.1201	0.6762		0.8587			1
ABalpaaappa	WT_Sample4	205		3.9016			0.8233			1
ABalpaaappa	WT_Sample4	206		4.4265			0.7996			1
ABalpaaappa	WT_Sample4	207		3.8083			0.8276			1
ABalpaaappa	WT_Sample4	208		4.0999	0.6115		0.8144			1
ABalpaaappp	WT_Sample4	202		4.3915	0.7598
ABalpaaappp	WT_Sample4	203		4.0357	0.7742		0.5132
ABalpaapaaa	WT_Sample4	185		2.7002		0.795	0.8507
ABalpaapaap	WT_Sample4	215		3.1843		1.1651	0.8571
ABalpaappap	WT_Sample4	184		2.9218		1.171	0.7768
ABalpaapppp	WT_Sample4	189		3.5867	0.535	0.8266	0.7792
ABalpapaaaa	WT_Sample4	173		4.444
ABalpapaaaa	WT_Sample4	174		2.5078			0.6306
ABalpapaaaa	WT_Sample4	175		2.1753			0.6796
ABalpapaaaa	WT_Sample4	176		2.6477	0.5657		0.61
ABalpapaaaa	WT_Sample4	177		2.5428	0.4601		0.6254
ABalpapaaaa	WT_Sample4	178		4.0649	0.7126
ABalpapaaaa	WT_Sample4	182		3.3009			0.5137
ABalpapaaaa	WT_Sample4	183		2.5661		0.7337	0.622
ABalpapaaaa	WT_Sample4	185		3.8316
ABalpapaaaa	WT_Sample4	186		3.6042
ABalpapaaaa	WT_Sample4	188		2.9568			0.5644
ABalpapaaaa	WT_Sample4	189		2.4086			0.6452
ABalpapaaaa	WT_Sample4	190		2.8927			0.5739
ABalpapaaaa	WT_Sample4	191		2.5136			0.6297
ABalpapaaaa	WT_Sample4	192		2.7469			0.5954
ABalpapaaaa	WT_Sample4	193		2.4553			0.6383
ABalpapaaaa	WT_Sample4	194		3.0093			0.5567
ABalpapaaaa	WT_Sample4	195		3.4875			0.4863
ABalpapaaaa	WT_Sample4	196		3.4934	0.7796		0.4854
ABalpapaaaa	WT_Sample4	197		2.916	0.5321		0.5704
ABalpapaaaa	WT_Sample4	199		2.9976	0.7673	0.8179	0.5584
ABalpapaaap	WT_Sample4	178		3.7092	0.7126		0.7396
ABalpapaaap	WT_Sample4	179		2.4903	0.7011		0.8251
ABalpapaaap	WT_Sample4	196		2.4669	0.7796		0.8268
ABalpapaaap	WT_Sample4	198		2.2045	0.6675		0.8452
ABalpapaaap	WT_Sample4	199		3.2951	0.7673		0.7686
ABalpapaaap	WT_Sample4	201		3.0093	0.5666		0.7887
ABalpapaaap	WT_Sample4	202		3.7092	0.5112		0.7396
ABalpapaaap	WT_Sample4	204		3.8258	0.5547		0.7314
ABalpapaaap	WT_Sample4	218		2.8169	0.5056	0.8034	0.8022
ABalpapaapp	WT_Sample4	187		3.9483						1
ABalpapaapp	WT_Sample4	189		2.6011						1
ABalpapaapp	WT_Sample4	190		3.0735						1
ABalpapaapp	WT_Sample4	191		3.2076		0.8644				1
ABalpapaapp	WT_Sample4	201		2.4786						1
ABalpapaapp	WT_Sample4	202		2.5194						1
ABalpapaapp	WT_Sample4	203		2.6244						1
ABalpapaapp	WT_Sample4	204		2.6944						1
ABalpapaapp	WT_Sample4	205		2.5836						1
ABalpapaapp	WT_Sample4	206		2.9976						1
ABalpapaapp	WT_Sample4	207		2.9685						1
ABalpapaapp	WT_Sample4	208		3.1201						1
ABalpapaapp	WT_Sample4	209		3.4117						1
ABalpapaapp	WT_Sample4	210		3.3826						1
ABalpapaapp	WT_Sample4	211		3.0268						1
ABalpapaapp	WT_Sample4	212		2.881						1
ABalpapaapp	WT_Sample4	213		3.8375						1
ABalpapaapp	WT_Sample4	214		2.9918						1
ABalpapaapp	WT_Sample4	215		2.7877						1
ABalpapaapp	WT_Sample4	216		2.8285						1
ABalpapaapp	WT_Sample4	217		2.6186						1
ABalpapaapp	WT_Sample4	218		2.776						1
ABalpapaapp	WT_Sample4	219		2.846						1
ABalpapaapp	WT_Sample4	220		2.8518						1
ABalpapappa	WT_Sample4	206		4.3973			0.6137			1
ABalpapappa	WT_Sample4	216		2.4378			0.7859			1
ABalpapappa	WT_Sample4	217		2.6536	0.4874		0.7669			1
ABalpapappa	WT_Sample4	218		2.5136			0.7792			1
ABalpapappa	WT_Sample4	219		2.4378			0.7859			1
ABalpapappa	WT_Sample4	220		2.4844			0.7818			1
ABalpappaaa	WT_Sample4	179		3.8433						1
ABalpappaaa	WT_Sample4	181		3.435						1
ABalpappaaa	WT_Sample4	182		2.6302			0.5583			1
ABalpappaaa	WT_Sample4	183		2.6827			0.5495			1
ABalpappaaa	WT_Sample4	184		2.4261			0.5926			1
ABalpappaaa	WT_Sample4	185		2.2337			0.6249			1
ABalpappaaa	WT_Sample4	186		2.4028			0.5965			1
ABalpappaaa	WT_Sample4	187		2.7352			0.5406			1
ABalpappaaa	WT_Sample4	188		2.9277			0.5083			1
ABalpapppap	WT_Sample4	205		3.7558	0.5986		0.7417			1
ABalpapppap	WT_Sample4	206		3.715	0.6142		0.7445			1
ABalpapppap	WT_Sample4	207		2.4028	0.582		0.8347			1
ABalpapppap	WT_Sample4	208		2.1695	0.6548		0.8508			1
ABalpapppap	WT_Sample4	209		2.3503	0.6177		0.8383			1
ABalpapppap	WT_Sample4	210		2.5894	0.6447		0.8219			1
ABalpapppap	WT_Sample4	211		2.9452	0.6278		0.7974			1
ABalpapppap	WT_Sample4	212		2.6419	0.6134		0.8183			1
ABalpapppap	WT_Sample4	213		2.9685	0.6078		0.7958			1
ABalpapppap	WT_Sample4	214		2.9218	0.6297		0.799			1
ABalpapppap	WT_Sample4	215		2.4728	0.7001		0.8299			1
ABalpapppap	WT_Sample4	216		2.9568	0.621		0.7966			1
ABalpapppap	WT_Sample4	217		3.1609	0.6766		0.7826			1
ABalpapppap	WT_Sample4	218		2.4961	0.6724		0.8283			1
ABalpapppap	WT_Sample4	219		2.6594	0.7102		0.8171			1
ABalppaaapp	WT_Sample4	210		2.916	0.4769		0.7472
ABalppaaapp	WT_Sample4	211		4.3332			0.6244
ABalppaaapp	WT_Sample4	212		2.7352			0.7629
ABalppaaapp	WT_Sample4	214		3.4176			0.7037
ABalppaaapp	WT_Sample4	217		2.9685			0.7427
ABalppaaapp	WT_Sample4	219		3.2193			0.7209
ABalppaappa	WT_Sample4	200		3.9249			0.6638			1
ABalppaappp	WT_Sample4	195		2.9043	0.5345		0.7343
ABalppapaaa	WT_Sample4	216		4.0474	0.7178		0.654
ABalppapaap	WT_Sample4	207		3.0151			0.7067
ABalppapaap	WT_Sample4	212		4.2457			0.587
ABalppapaap	WT_Sample4	213		3.8724			0.6233
ABalppapaap	WT_Sample4	216		3.5459	0.7178		0.655
ABalppapapp	WT_Sample4	187		3.1726	0.493		0.7154
ABalppapppp	WT_Sample4	212		2.8868			0.7803
ABalpppaapd	WT_Sample4	212		4.0124	0.713
ABalpppaapv	WT_Sample4	207		3.2601	0.5285		0.5029			1
ABalpppaapv	WT_Sample4	208		2.5428	0.5883		0.6123			1
ABalpppaapv	WT_Sample4	209		3.0268	0.6381		0.5385			1
ABalpppaapv	WT_Sample4	210		3.5109	0.6497					1
ABalpppaapv	WT_Sample4	211		2.7469	0.6804		0.5811			1
ABalpppaapv	WT_Sample4	212		3.3476	0.713		0.4896			1
ABalpppaapv	WT_Sample4	213		4.0707	0.5644					1
ABalpppaapv	WT_Sample4	214		3.6567	0.6706					1
ABalpppaapv	WT_Sample4	215		3.8491	0.6506					1
ABalpppaapv	WT_Sample4	217		4.4207	0.6024					1
ABalpppaapv	WT_Sample4	218		4.4673	0.5251					1
ABalpppaapv	WT_Sample4	219		4.2399	0.6424					1
ABalpppappa	WT_Sample4	179		4.4032		1.6343				1
ABalpppappa	WT_Sample4	181		2.7235						1
ABalpppappa	WT_Sample4	182		2.4436		2.0526				1
ABalpppappa	WT_Sample4	184		3.6217						1
ABalpppappa	WT_Sample4	185		3.8899						1
ABalpppappa	WT_Sample4	186		4.2282						1
ABalpppappa	WT_Sample4	187		3.1493						1
ABalpppappa	WT_Sample4	188		4.1466						1
ABalpppappa	WT_Sample4	189		3.7966						1
ABalpppappa	WT_Sample4	190		3.1784						1
ABalpppappa	WT_Sample4	191		3.4467						1
ABalpppappa	WT_Sample4	192		4.1932						1
ABalpppappa	WT_Sample4	193		2.7294						1
ABalpppappa	WT_Sample4	194		2.6361						1
ABalpppappa	WT_Sample4	195		2.4844						1
ABalpppappa	WT_Sample4	196		2.4203						1
ABalpppappa	WT_Sample4	197		2.4961						1
ABalpppappa	WT_Sample4	198		2.3911						1
ABalpppappa	WT_Sample4	199		2.5544						1
ABalpppappa	WT_Sample4	200		2.4611						1
ABalppppaav	WT_Sample4	191		3.8258						1
ABalppppaav	WT_Sample4	192		3.7733						1
ABalppppaav	WT_Sample4	193		3.5167						1
ABalppppaav	WT_Sample4	194		3.9599						1
ABalppppaav	WT_Sample4	195		2.7702	0.5241					1
ABalppppaav	WT_Sample4	196		2.9685						1
ABalppppaav	WT_Sample4	197		3.47						1
ABalppppaav	WT_Sample4	198		2.9335						1
ABalppppaav	WT_Sample4	199		2.6302						1
ABalppppaav	WT_Sample4	200		2.881	0.4602					1
ABalppppaav	WT_Sample4	201		2.7177	0.4686					1
ABalppppaav	WT_Sample4	202		4.1932						1
ABalppppaav	WT_Sample4	203		3.0443	0.6319	1.0122				1
ABalppppaav	WT_Sample4	206		2.8635						1
ABalppppaav	WT_Sample4	207		3.1901						1
ABalppppaav	WT_Sample4	208		3.7791						1
ABalppppaav	WT_Sample4	210		3.126						1
ABalppppaav	WT_Sample4	211		3.1201						1
ABalppppaav	WT_Sample4	212		2.811						1
ABalppppaav	WT_Sample4	213		3.0093						1
ABalppppaav	WT_Sample4	214		2.8052						1
ABalppppaav	WT_Sample4	215		3.2543						1
ABalppppaav	WT_Sample4	216		2.706						1
ABalppppaav	WT_Sample4	217		2.6944						1
ABalppppapp	WT_Sample4	174		3.9366		1.114	0.4836			1
ABalppppapp	WT_Sample4	184		4.3623						1
ABalppppapp	WT_Sample4	185		3.1726	0.4872		0.5838			1
ABalppppapp	WT_Sample4	186		3.0443			0.6006			1
ABalppppapp	WT_Sample4	187		3.5808			0.5302			1
ABalppppapp	WT_Sample4	188		3.0268			0.6029			1
ABalppppapp	WT_Sample4	189		2.7177			0.6435			1
ABalppppapp	WT_Sample4	190		3.7616			0.5065			1
ABalppppapp	WT_Sample4	191		3.1609			0.5853			1
ABalppppapp	WT_Sample4	192		3.2659			0.5715			1
ABaraaaaapp	WT_Sample4	209		2.1812			0.8274
ABaraaapapa	WT_Sample4	210		2.327	0.5547	1.1108	0.9422
ABaraapaaap	WT_Sample4	210		3.7266			0.7294
ABaraapaapa	WT_Sample4	197		2.2278		0.9791	0.8671
ABaraappapp	WT_Sample4	209		3.7675	0.7028	1.2985	0.8446
ABarapaaaap	WT_Sample4	206		3.82			0.7046
ABarapaaapp	WT_Sample4	207		2.9043			0.7612			1
ABarapaaapp	WT_Sample4	208		2.5544			0.79			1
ABarapaaapp	WT_Sample4	209		2.6944			0.7785			1
ABarapaaapp	WT_Sample4	210		2.5369			0.7914			1
ABarapaaapp	WT_Sample4	211		2.8577			0.765			1
ABarapaaapp	WT_Sample4	212		4.0591	0.5707		0.6663			1
ABarapaaapp	WT_Sample4	213		2.7819			0.7713			1
ABarapaaapp	WT_Sample4	214		3.0501			0.7492			1
ABarapaaapp	WT_Sample4	215		2.6361			0.7833			1
ABarapaaapp	WT_Sample4	216		3.091			0.7459			1
ABarapaaapp	WT_Sample4	217		3.1551			0.7406			1
ABarapaaapp	WT_Sample4	219		4.4556			0.6337			1
ABarapaaapp	WT_Sample4	220		3.021			0.7516			1
ABarapaapaa	WT_Sample4	207		2.4203	0.6218	1.3417	0.8006
ABarapaapaa	WT_Sample4	211		4.2924	0.4741		0.6463
ABarapaapap	WT_Sample4	192		3.715						1
ABarapaapap	WT_Sample4	193		3.3009						1
ABarapaapap	WT_Sample4	194		3.7675						1
ABarapaapap	WT_Sample4	195		3.0385	0.4824					1
ABarapaapap	WT_Sample4	196		3.2601						1
ABarapaapap	WT_Sample4	197		2.9393	0.4576					1
ABarapaapap	WT_Sample4	198		2.8927						1
ABarapaapap	WT_Sample4	199		3.0385						1
ABarapaapap	WT_Sample4	200		2.881						1
ABarapaapap	WT_Sample4	201		3.126						1
ABarapaapap	WT_Sample4	202		2.7527			0.4842			1
ABarapaapap	WT_Sample4	203		4.0299		0.8109				1
ABarapaapap	WT_Sample4	213		4.4148	0.5187					1
ABarapaapap	WT_Sample4	214		3.8958	0.461					1
ABarapaapap	WT_Sample4	217		4.5081	0.4653					1
ABarapaapap	WT_Sample4	218		4.0124	0.5417					1
ABarapaapap	WT_Sample4	219		3.0035	0.5523					1
ABarapaapap	WT_Sample4	220		2.7527	0.5327		0.4842			1
ABarapaappp	WT_Sample4	182		2.7002			0.7715
ABarapaappp	WT_Sample4	210		3.8083	0.5413		0.6778
ABarapapaaa	WT_Sample4	188		3.3767						1
ABarapapaaa	WT_Sample4	189		2.7819	0.48					1
ABarapapaaa	WT_Sample4	190		2.6711	0.5024					1
ABarapapaaa	WT_Sample4	191		3.1434	0.6449					1
ABarapapaaa	WT_Sample4	192		2.8518	1.1309					1
ABarapapaaa	WT_Sample4	193		2.8169	0.5978					1
ABarapapaaa	WT_Sample4	194		2.9452	0.6729					1
ABarapapaaa	WT_Sample4	195		2.4086	0.9993					1
ABarapapaaa	WT_Sample4	196		2.5952	0.9202					1
ABarapapaaa	WT_Sample4	197		3.0443	0.6344					1
ABarapapaaa	WT_Sample4	198		2.7702	0.861					1
ABarapapaaa	WT_Sample4	199		2.5078						1
ABarapapaaa	WT_Sample4	200		2.6302						1
ABarapapaaa	WT_Sample4	201		2.8227						1
ABarapapaaa	WT_Sample4	202		3.6392						1
ABarapapaaa	WT_Sample4	203		2.7935						1
ABarapapaaa	WT_Sample4	204		2.4786						1
ABarapapaaa	WT_Sample4	205		2.4028	0.5766					1
ABarapapaaa	WT_Sample4	206		2.6011	0.7681					1
ABarapapaaa	WT_Sample4	207		2.4494	1.1404					1
ABarapapppp	WT_Sample4	206		3.2776			0.9358
ABarappaapp	WT_Sample4	197		4.4265						1
ABarappaapp	WT_Sample4	205		4.1116						1
ABarappapaa	WT_Sample4	191		2.916			0.6369
ABarappapaa	WT_Sample4	193		2.6127	0.4837		0.6747
ABarappapaa	WT_Sample4	194		2.3386	0.6623		0.7088
ABarappapaa	WT_Sample4	195		3.6392	0.5106		0.5468
ABarappapaa	WT_Sample4	196		3.3942			0.5773
ABarappapaa	WT_Sample4	197		3.6625	0.5421		0.5439
ABarappapaa	WT_Sample4	198		4.2457		0.9288
ABarappapaa	WT_Sample4	201		3.2892			0.5904
ABarappappa	WT_Sample4	193		4.0532		0.779	0.7202
ABarapppaap	WT_Sample4	202		3.2018			0.6302
ABarapppapp	WT_Sample4	188		2.9218	0.5914	0.71
ABarapppapp	WT_Sample4	191		3.7441	0.4927	1.258
ABarapppapp	WT_Sample4	194		4.1699	0.5228
ABarapppapp	WT_Sample4	195		2.8285	0.481		0.4995
ABarapppapp	WT_Sample4	197		3.2951	0.4591
ABarapppapp	WT_Sample4	203		4.4207
ABarapppapp	WT_Sample4	208		4.4731
ABarapppapp	WT_Sample4	209		2.3503			0.5841
ABarapppapp	WT_Sample4	210		2.4844			0.5604
ABarapppapp	WT_Sample4	211		2.6827			0.5253
ABarapppapp	WT_Sample4	212		2.5777	0.4663		0.5439
ABarapppapp	WT_Sample4	213		2.3503	0.4599		0.5841
ABarapppapp	WT_Sample4	214		2.6594			0.5294
ABarapppapp	WT_Sample4	215		3.4292
ABarapppapp	WT_Sample4	216		2.2978			0.5934
ABarapppapp	WT_Sample4	217		3.47	0.5622
ABarapppapp	WT_Sample4	218		2.7527	0.5323		0.5129
ABarapppapp	WT_Sample4	219		3.7266	0.5284
ABarpaaapap	WT_Sample4	206		3.1843			0.6725
ABarpaaapap	WT_Sample4	207		2.846			0.7073
ABarpaaapap	WT_Sample4	211		3.6158			0.6281
ABarpaaapap	WT_Sample4	212		3.9133			0.5975
ABarpaaapap	WT_Sample4	213		2.9335			0.6983
ABarpaaapap	WT_Sample4	215		2.4494			0.7481
ABarpaaapap	WT_Sample4	216		2.5777	0.4647		0.7349
ABarpaaapap	WT_Sample4	218		2.9277		1.192	0.6989
ABarpapaaap	WT_Sample4	196		3.1376		1.0288	0.8131			1
ABarpapaaap	WT_Sample4	201		3.0968			0.8156			1
ABarpapaapa	WT_Sample4	181		3.0443			0.5766			1
ABarpapaapa	WT_Sample4	182		2.6186			0.6358			1
ABarpapaapa	WT_Sample4	183		2.7877			0.6123			1
ABarpapaapa	WT_Sample4	184		2.4786			0.6553			1
ABarpapaapa	WT_Sample4	185		2.4086			0.665			1
ABarpapaapa	WT_Sample4	186		2.2861			0.6821			1
ABarpapaapa	WT_Sample4	187		2.187			0.6959			1
ABarpapaapa	WT_Sample4	188		2.4669			0.6569			1
ABarpapaapa	WT_Sample4	189		2.3503			0.6732			1
ABplaaaaapa	WT_Sample4	189		3.1901			0.686			1
ABplaaaaapa	WT_Sample4	190		3.4001			0.6653			1
ABplaaaaapa	WT_Sample4	191		3.505			0.655			1
ABplaaaaapa	WT_Sample4	192		2.9393			0.7107			1
ABplaaaaapa	WT_Sample4	193		3.0793			0.6969			1
ABplaaaaapa	WT_Sample4	194		2.6419	0.4724		0.74			1
ABplaaaaapa	WT_Sample4	195		2.5136			0.7526			1
ABplaaaaapa	WT_Sample4	196		2.5777			0.7463			1
ABplaaaaapa	WT_Sample4	197		2.8169			0.7227			1
ABplaaaaapa	WT_Sample4	198		2.7119			0.7331			1
ABplaaaaapa	WT_Sample4	199		2.5311			0.7509			1
ABplaaaaapa	WT_Sample4	200		2.2978			0.7738			1
ABplaaaaapa	WT_Sample4	201		2.5194			0.752			1
ABplaaaaapa	WT_Sample4	202		3.6333			0.6424			1
ABplaapaaap	WT_Sample4	208		2.3561		0.6952	0.834
ABplaapaaap	WT_Sample4	211		3.0093	0.4676		0.788
ABplaapaapa	WT_Sample4	187		4.2282			0.5429
ABplaapaapa	WT_Sample4	189		4.1524			0.5511
ABplaapappa	WT_Sample4	217		4.234	0.5688	1.1415	0.7772
ABplapaaaap	WT_Sample4	197		2.951			0.891
ABplapapppa	WT_Sample4	214		2.2686			0.7326			1
ABplapapppa	WT_Sample4	215		2.1345			0.7485			1
ABplapapppa	WT_Sample4	216		2.3736			0.7203			1
ABplapapppa	WT_Sample4	217		2.3736			0.7203			1
ABplapppaap	WT_Sample4	215		3.715			0.6321			1
ABplapppaap	WT_Sample4	216		3.2484			0.6783			1
ABplapppaap	WT_Sample4	217		3.2718			0.676			1
ABplapppaap	WT_Sample4	218		2.8985			0.713			1
ABplapppaap	WT_Sample4	219		2.7702			0.7257			1
ABplapppaap	WT_Sample4	220		2.6302			0.7395			1
ABplapppapa	WT_Sample4	189		3.5225						1
ABplapppapa	WT_Sample4	190		2.6536						1
ABplapppapa	WT_Sample4	191		2.5253						1
ABplapppapa	WT_Sample4	192		2.7002						1
ABplapppapa	WT_Sample4	193		2.8635						1
ABplapppapa	WT_Sample4	194		2.5719						1
ABplapppapa	WT_Sample4	195		2.5777						1
ABplapppapa	WT_Sample4	196		2.5836						1
ABplapppapa	WT_Sample4	197		2.4086						1
ABplapppapa	WT_Sample4	198		2.2803						1
ABplapppapa	WT_Sample4	199		2.3095						1
ABplapppapa	WT_Sample4	200		2.3445						1
ABplapppapa	WT_Sample4	201		2.3678						1
ABplapppapa	WT_Sample4	202		2.2803		2.1507				1
ABplapppapa	WT_Sample4	205		2.3445						1
ABplapppapa	WT_Sample4	206		2.397		2.4236				1
ABplapppapa	WT_Sample4	208		2.5253						1
ABplapppapa	WT_Sample4	209		2.3853						1
ABplpaapapp	WT_Sample4	208		4.234						1
ABplpaapapp	WT_Sample4	209		4.2399						1
ABplpaapapp	WT_Sample4	211		3.8783						1
ABplpaapapp	WT_Sample4	212		3.9483	0.6511					1
ABplpappaaa	WT_Sample4	163		3.021			0.7881
ABplpappaaa	WT_Sample4	166		4.1932			0.7059
ABplpappaaa	WT_Sample4	167		3.4176			0.7603
ABplpappaaa	WT_Sample4	172		3.5867			0.7485
ABplpappaaa	WT_Sample4	176		2.7119			0.8098
ABplpappaaa	WT_Sample4	177		4.4498			0.6879
ABplpappaaa	WT_Sample4	179		2.7644			0.8061
ABplpappaaa	WT_Sample4	180		3.75			0.737
ABplpapppap	WT_Sample4	172		3.4817			0.7799
ABplpapppap	WT_Sample4	173		2.8344			0.8209
ABplpapppap	WT_Sample4	174		2.3503		0.718	0.8515
ABplppaaaaa	WT_Sample4	175		2.8927		0.9097	0.7772
ABplppaapaa	WT_Sample4	203		3.5517			0.6704			1
ABplppaapaa	WT_Sample4	204		2.4028			0.777			1
ABplppaapaa	WT_Sample4	205		2.9568			0.7256			1
ABplppaapaa	WT_Sample4	206		2.292			0.7873			1
ABplppaapaa	WT_Sample4	207		2.4436			0.7732			1
ABplppaapaa	WT_Sample4	208		2.3095			0.7857			1
ABplppaapaa	WT_Sample4	209		2.2045			0.7954			1
ABplppaapaa	WT_Sample4	210		2.3503		1.4972	0.7819			1
ABplppaapaa	WT_Sample4	212		3.3126			0.6926			1
ABplppaapaa	WT_Sample4	213		2.6711			0.7521			1
ABplppaapaa	WT_Sample4	214		2.4261			0.7748			1
ABplppaapaa	WT_Sample4	215		2.5544	0.4848		0.7629			1
ABplppaappp	WT_Sample4	189		4.0066	0.4838		0.6238
ABplpppaaap	WT_Sample4	198		3.3126	0.6973		0.6502
ABplpppaaap	WT_Sample4	199		2.4261	0.6948		0.7438
ABplpppaaap	WT_Sample4	200		2.5661	0.6853		0.7291
ABplpppaaap	WT_Sample4	201		2.7119	0.6191		0.7137
ABplpppaaap	WT_Sample4	205		2.5311	0.6367		0.7328
ABplpppaaap	WT_Sample4	206		3.6625	0.6506		0.6133
ABplpppaaap	WT_Sample4	207		2.9743	0.6532		0.686
ABplpppaapp	WT_Sample4	182		3.9658			0.5542
ABplpppaapp	WT_Sample4	191		3.7208			0.5818
ABplpppapaa	WT_Sample4	170		4.0649
ABplpppapaa	WT_Sample4	171		4.0008
ABplpppapaa	WT_Sample4	172		3.75
ABplpppapaa	WT_Sample4	173		3.2134			0.508
ABplpppapaa	WT_Sample4	174		4.0707
ABplpppapaa	WT_Sample4	177		3.0501			0.533
ABplpppapaa	WT_Sample4	179		3.9016
ABplpppapaa	WT_Sample4	180		3.7733
ABplpppapaa	WT_Sample4	194		4.4265
ABplppppapa	WT_Sample4	174		3.435	0.5116		0.7785
ABpraaaaapd	WT_Sample4	210		4.199	0.6453
ABpraaaaapd	WT_Sample4	211		2.7702	0.7165		0.6554
ABpraaaaapd	WT_Sample4	212		2.4086	0.7607		0.7004
ABpraaaaapd	WT_Sample4	213		2.3795	0.761		0.704
ABpraaaaapd	WT_Sample4	216		4.269	0.6451
ABpraaaaapd	WT_Sample4	217		2.4728	0.5716		0.6924
ABpraaaaapd	WT_Sample4	218		3.0385	0.6869		0.6221
ABpraaaaapd	WT_Sample4	219		2.9568	0.7122		0.6322
ABpraaaaapd	WT_Sample4	220		2.776	0.7067		0.6547
ABpraaaaapv	WT_Sample4	207		3.4525						1
ABpraaaaapv	WT_Sample4	209		3.6625						1
ABpraaaaapv	WT_Sample4	210		3.0093	0.6453		0.5356			1
ABpraaaaapv	WT_Sample4	211		2.9918	0.7165		0.5383			1
ABpraaaaapv	WT_Sample4	212		2.4553	0.7607		0.6211			1
ABpraaaaapv	WT_Sample4	213		2.4786	0.761		0.6175			1
ABpraaaaapv	WT_Sample4	214		2.3795	0.5971		0.6328			1
ABpraaaaapv	WT_Sample4	215		2.3911	0.6307		0.631			1
ABpraaaaapv	WT_Sample4	216		2.9452	0.6451		0.5455			1
ABpraaaaapv	WT_Sample4	218		3.3242	0.6869		0.4869			1
ABpraaaaapv	WT_Sample4	219		2.8927	0.7122		0.5536			1
ABpraaaaapv	WT_Sample4	220		3.1843	0.7067		0.5086			1
ABpraaaapad	WT_Sample4	210		3.3942			0.625
ABpraaaapad	WT_Sample4	213		4.2282	0.4682		0.5329
ABpraaaapad	WT_Sample4	220		4.304			0.5245
ABpraaaappa	WT_Sample4	177		3.8258						1
ABpraaaappa	WT_Sample4	178		4.5256						1
ABpraaaappa	WT_Sample4	181		4.1116						1
ABpraaaappa	WT_Sample4	182		4.2049						1
ABpraaaappa	WT_Sample4	183		3.9308						1
ABpraaaappa	WT_Sample4	184		4.1407						1
ABpraaaappa	WT_Sample4	188		4.234						1
ABpraaaappa	WT_Sample4	189		4.1232						1
ABpraaaappa	WT_Sample4	190		3.5983						1
ABpraaaappa	WT_Sample4	191		3.5284						1
ABpraaaappa	WT_Sample4	192		3.3651						1
ABpraaaappa	WT_Sample4	193		2.8868						1
ABpraaaappa	WT_Sample4	194		2.6361						1
ABpraaaappa	WT_Sample4	195		2.2337						1
ABpraaaappa	WT_Sample4	196		3.4642						1
ABpraaaappa	WT_Sample4	197		2.362						1
ABpraaaappa	WT_Sample4	198		2.2278						1
ABpraaaappa	WT_Sample4	199		2.3561						1
ABpraaaappa	WT_Sample4	200		2.5136						1
ABpraaaappa	WT_Sample4	201		2.3211						1
ABpraaapaav	WT_Sample4	196		3.2892						1
ABpraaapaav	WT_Sample4	197		2.8752						1
ABpraaapaav	WT_Sample4	198		3.5167						1
ABpraaapaav	WT_Sample4	199		4.0416						1
ABpraaapaav	WT_Sample4	200		2.6011						1
ABpraaapaav	WT_Sample4	201		2.7935						1
ABpraaapaav	WT_Sample4	202		2.5777						1
ABpraaapaav	WT_Sample4	203		2.741						1
ABpraaapaav	WT_Sample4	204		3.3067						1
ABpraaapaav	WT_Sample4	205		2.7527						1
ABpraaapaav	WT_Sample4	206		2.776						1
ABpraaapaav	WT_Sample4	207		2.6419						1
ABpraaapaav	WT_Sample4	208		2.4319						1
ABpraaapaav	WT_Sample4	209		2.8402						1
ABpraaapaav	WT_Sample4	210		2.5602						1
ABpraaapaav	WT_Sample4	211		2.5602						1
ABpraaapaav	WT_Sample4	212		2.6419						1
ABpraaapapa	WT_Sample4	191		4.0824
ABpraaapapa	WT_Sample4	192		3.6217	0.46
ABpraaapapa	WT_Sample4	193		3.3067
ABpraaapapa	WT_Sample4	194		3.6275
ABpraaapapa	WT_Sample4	195		3.3184	0.4604
ABpraaapapa	WT_Sample4	196		4.1932
ABpraaapapa	WT_Sample4	197		3.0151
ABpraaapapa	WT_Sample4	198		2.9685
ABpraaapapa	WT_Sample4	199		2.4436
ABpraaapapa	WT_Sample4	200		2.6127
ABpraaapapa	WT_Sample4	201		2.8344
ABpraaapapa	WT_Sample4	202		2.4728
ABpraaapapa	WT_Sample4	203		2.6361
ABpraaapapa	WT_Sample4	204		3.021
ABpraaapapa	WT_Sample4	205		2.7877
ABpraaapapa	WT_Sample4	206		2.8927
ABpraaapapa	WT_Sample4	207		2.6127
ABpraaapapa	WT_Sample4	208		2.6594
ABpraaapapa	WT_Sample4	209		2.5078
ABpraaapapa	WT_Sample4	210		2.5369
ABpraaapapa	WT_Sample4	211		2.6594
ABpraaapapa	WT_Sample4	212		2.4203
ABpraaapapa	WT_Sample4	213		2.6419
ABpraaapapa	WT_Sample4	214		2.6827
ABpraaapapa	WT_Sample4	215		2.5428
ABpraaapapa	WT_Sample4	216		2.7935
ABpraaapapa	WT_Sample4	217		3.0268
ABpraaapapa	WT_Sample4	218		2.916	0.4813
ABpraaapapa	WT_Sample4	219		2.8693	0.5001
ABpraaapapa	WT_Sample4	220		2.9802
ABpraapaaaa	WT_Sample4	185		4.0066			0.5907
ABpraapaaap	WT_Sample4	194		4.4615	0.4598
ABpraapaaap	WT_Sample4	196		3.3592			0.4985
ABpraapaaap	WT_Sample4	211		2.5777	0.6399		0.6152
ABpraapaaap	WT_Sample4	212		2.5194	0.6573		0.6239
ABpraapaaap	WT_Sample4	213		2.5836	0.5823		0.6143
ABpraapaaap	WT_Sample4	214		2.4436	0.6456		0.6352
ABpraapaaap	WT_Sample4	215		2.7527	0.6014		0.589
ABpraapaaap	WT_Sample4	216		2.397	0.4698		0.6421
ABpraapaaap	WT_Sample4	217		2.7527	0.4837		0.589
ABpraapaaap	WT_Sample4	218		2.7002	0.5438		0.5969
ABpraapaaap	WT_Sample4	219		3.3476	0.499		0.5002
ABpraapaaap	WT_Sample4	220		4.0299	0.4621
ABpraapaapa	WT_Sample4	188		2.4494	0.5441		0.7421
ABpraapaapa	WT_Sample4	189		3.4525	0.8617		0.6365
ABpraapaapa	WT_Sample4	192		3.6042			0.6205
ABpraapaapa	WT_Sample4	194		3.2134			0.6617
ABpraapaapp	WT_Sample4	189		2.9277	0.8617		0.9028
ABprapaaaaa	WT_Sample4	210		2.5836			0.6596			1
ABprapaaaaa	WT_Sample4	211		2.2512			0.7034			1
ABprapaaaap	WT_Sample4	193		3.021		0.8699	0.8794
ABprapapppa	WT_Sample4	212		2.6886			0.6931			1
ABprapapppa	WT_Sample4	213		2.1987			0.749			1
ABprapapppa	WT_Sample4	214		2.1228			0.7577			1
ABprapapppa	WT_Sample4	215		2.292			0.7383			1
ABprapppaap	WT_Sample4	211		3.5225			0.5278			1
ABprapppaap	WT_Sample4	212		3.8724						1
ABprapppaap	WT_Sample4	218		3.0035			0.5973			1
ABprapppaap	WT_Sample4	219		2.5078			0.6638			1
ABprapppaap	WT_Sample4	220		2.2162			0.7029			1
ABprapppapa	WT_Sample4	201		2.9802			0.6017			1
ABprapppapa	WT_Sample4	202		2.4144			0.6773			1
ABprapppapa	WT_Sample4	203		2.2686			0.6968			1
ABprapppapa	WT_Sample4	204		2.8693			0.6165			1
ABprapppapa	WT_Sample4	205		2.9218			0.6095			1
ABprapppapa	WT_Sample4	206		2.7644			0.6306			1
ABprapppapa	WT_Sample4	207		2.3736			0.6828			1
ABprapppapa	WT_Sample4	208		2.5311			0.6617			1
ABprapppapa	WT_Sample4	209		2.5078			0.6648			1
ABprapppapa	WT_Sample4	210		2.2686			0.6968			1
ABprapppapa	WT_Sample4	211		2.5194			0.6633			1
ABprapppapa	WT_Sample4	212		2.8518			0.6189			1
ABprapppapa	WT_Sample4	213		2.9452			0.6064			1
ABprapppapa	WT_Sample4	214		3.0093			0.5978			1
ABprapppapa	WT_Sample4	215		2.3328			0.6882			1
ABprpaaaapa	WT_Sample4	205		4.514	0.7344
ABprpaaaapa	WT_Sample4	210		2.6069			0.6963
ABprpaaaapa	WT_Sample4	212		2.257	0.4782		0.7371
ABprpaaaapa	WT_Sample4	213		3.6917			0.57
ABprpaaaapa	WT_Sample4	215		3.5225			0.5897
ABprpaaaapa	WT_Sample4	216		2.6652	0.5134	0.6895	0.6895
ABprpaaaapp	WT_Sample4	198		3.6917	0.639		0.7194
ABprpaaaapp	WT_Sample4	199		4.409	0.5998		0.6649
ABprpaaaapp	WT_Sample4	200		4.234	0.6383		0.6782
ABprpaaapaa	WT_Sample4	215		2.9393	0.7123		0.6772
ABprpaaapaa	WT_Sample4	216		2.7702	0.7416	0.8831	0.6958
ABprpaaapap	WT_Sample4	213		3.0851	0.5181		0.684
ABprpaaapap	WT_Sample4	214		3.1959			0.6726
ABprpaaapap	WT_Sample4	215		3.4875	0.7123		0.6428
ABprpaaapap	WT_Sample4	216		3.0035	0.7416		0.6924
ABprpaaapap	WT_Sample4	217		3.3534		0.8554	0.6565
ABprpaaappp	WT_Sample4	203		3.4059			0.5789
ABprpaapapa	WT_Sample4	213		3.9133	0.6938		0.6322
ABprpaapapa	WT_Sample4	214		3.7325	0.7614		0.6492
ABprpaapapa	WT_Sample4	215		3.091	0.7848		0.7095
ABprpaapapa	WT_Sample4	216		3.6683	0.7756		0.6552
ABprpaapapa	WT_Sample4	217		3.1609	0.7281		0.7029
ABprpaapapa	WT_Sample4	218		3.5342	0.6729		0.6679
ABprpaapapa	WT_Sample4	219		2.8344	0.8154		0.7336
ABprpaapapa	WT_Sample4	220		2.3445	0.8303		0.7797
ABprpaapapp	WT_Sample4	208		3.54	0.572					1
ABprpaapapp	WT_Sample4	210		4.1174	0.6094					1
ABprpaapapp	WT_Sample4	212		3.8608	0.567					1
ABprpaapapp	WT_Sample4	214		3.3767	0.7614		0.4833			1
ABprpaapapp	WT_Sample4	215		3.3184	0.7848		0.4922			1
ABprpaapapp	WT_Sample4	216		3.0151	0.7756		0.5386			1
ABprpaapapp	WT_Sample4	219		2.6652	0.8154		0.5921			1
ABprpaapapp	WT_Sample4	220		2.7119	0.8303		0.585			1
ABprpaappaa	WT_Sample4	214		3.2659			0.8216
ABprpaappaa	WT_Sample4	215		4.374			0.7611
ABprpaappaa	WT_Sample4	216		3.0035			0.8359
ABprpappaaa	WT_Sample4	184		2.292	0.7819		0.7826
ABprpappaaa	WT_Sample4	185		4.4906	0.7034		0.5741
ABprpappaaa	WT_Sample4	186		3.2543	0.7394		0.6914
ABprpappaaa	WT_Sample4	188		4.3273	0.6108		0.5896
ABprpappaap	WT_Sample4	181		2.5777	0.6317	1.001	0.7031
ABprpappaap	WT_Sample4	183		3.1026	0.5476		0.6426
ABprpappaap	WT_Sample4	184		3.1201	0.7819		0.6406
ABprpappaap	WT_Sample4	185		2.8693	0.7034		0.6695
ABprpappaap	WT_Sample4	186		3.2134	0.7394		0.6298
ABprpappaap	WT_Sample4	187		3.2718	0.6165		0.6231
ABprpappaap	WT_Sample4	189		3.5925	0.6519		0.5862
ABprpappaap	WT_Sample4	190		2.6886	0.6496		0.6903
ABprpappaap	WT_Sample4	193		3.9074	0.6338		0.5499
ABprpappaap	WT_Sample4	194		3.6042	0.5702		0.5848
ABprpappaap	WT_Sample4	195		2.2978	0.6945		0.7353
ABprpappaap	WT_Sample4	201		2.8927			0.6668
ABprpappaap	WT_Sample4	202		3.8433			0.5573
ABprpappaap	WT_Sample4	203		2.6711			0.6923
ABprpappaap	WT_Sample4	204		4.2165			0.5143
ABprpappaap	WT_Sample4	205		4.2049			0.5156
ABprpappapa	WT_Sample4	187		4.1291	0.652		0.7612
ABprpappapp	WT_Sample4	185		3.2834	0.5341		0.7604
ABprppaapaa	WT_Sample4	204		2.9918						1
ABprppaapaa	WT_Sample4	205		2.6186						1
ABprppaapaa	WT_Sample4	206		2.3911			0.5205			1
ABprppaapaa	WT_Sample4	207		2.1695			0.5649			1
ABprppaapaa	WT_Sample4	208		2.776						1
ABprppaapaa	WT_Sample4	209		3.3009						1
ABprppaapaa	WT_Sample4	210		3.056						1
ABprppaapaa	WT_Sample4	211		2.8344						1
ABprppaapaa	WT_Sample4	212		2.9335						1
ABprppaapaa	WT_Sample4	213		2.5078			0.4971			1
ABprppaapaa	WT_Sample4	214		2.3036			0.538			1
ABprppaapaa	WT_Sample4	215		2.292			0.5404			1
ABprppaapaa	WT_Sample4	216		2.257			0.5474			1
ABprppaapaa	WT_Sample4	217		2.2045			0.5579			1
ABprppaapaa	WT_Sample4	219		2.1637			0.5661			1
ABprppaapaa	WT_Sample4	220		4.4207						1
ABprpppaaap	WT_Sample4	208		3.6567	0.6222		0.5659
ABprpppaaap	WT_Sample4	209		4.2049	0.5816		0.5009
ABprpppaaap	WT_Sample4	210		3.3242	0.5619		0.6054
ABprpppaaap	WT_Sample4	211		3.3884	0.5914		0.5978
ABprpppaaap	WT_Sample4	212		4.2457	0.6339		0.496
ABprpppaaap	WT_Sample4	213		3.2718	0.6558		0.6116
ABprpppaaap	WT_Sample4	214		4.0766	0.6562		0.5161
ABprpppaaap	WT_Sample4	215		3.5284	0.6052		0.5812
ABprpppaaap	WT_Sample4	216		3.4117	0.7083		0.595
ABprpppaaap	WT_Sample4	217		3.1318	0.6712	0.7892	0.6282
ABprpppaapp	WT_Sample4	187		3.5634
ABprpppaapp	WT_Sample4	188		4.2865
ABprpppaapp	WT_Sample4	190		3.645		0.7971
ABprpppaapp	WT_Sample4	193		3.68
ABprpppaapp	WT_Sample4	194		3.2601			0.5245
ABprpppaapp	WT_Sample4	195		2.7294			0.6019
ABprpppaapp	WT_Sample4	196		2.776		0.8481	0.5951
ABprpppaapp	WT_Sample4	198		4.4848
ABprpppaapp	WT_Sample4	199		2.7644			0.5968
ABprpppaapp	WT_Sample4	200		2.8577	0.5036		0.5832
ABprpppaapp	WT_Sample4	207		3.0268		1.8222	0.5585
ABprpppaapp	WT_Sample4	209		3.1493			0.5406
ABprpppaapp	WT_Sample4	210		3.1668			0.5381
ABprpppapaa	WT_Sample4	196		4.1466	0.4774		0.6596
ABprpppapaa	WT_Sample4	197		3.75	0.4579		0.6921
ABprpppapaa	WT_Sample4	198		3.8258			0.6859
ABprpppapaa	WT_Sample4	199		3.8608			0.683
ABprpppapaa	WT_Sample4	203		4.1349	0.5536		0.6605
ABprpppapap	WT_Sample4	207		4.2282	0.8092		0.8699
ABprpppapap	WT_Sample4	208		4.0649	0.7721		0.8749
ABprppppapp	WT_Sample4	177		4.3623			0.67
ABprppppapp	WT_Sample4	183		4.0882	0.5188		0.6908
ABprppppapp	WT_Sample4	186		3.9074	0.602		0.7045
ABprppppapp	WT_Sample4	200		3.0501	0.6418	0.9687	0.7693
ABprppppppa	WT_Sample4	193		4.3915			0.6095			1
MSaaaappa	WT_Sample4	204		4.2924			0.5242			1
MSaaaappa	WT_Sample4	205		2.8752			0.6813			1
MSaaaappa	WT_Sample4	206		3.2018			0.6451			1
MSaaaappa	WT_Sample4	207		3.056			0.6613			1
MSaaaappa	WT_Sample4	208		3.2134			0.6438			1
MSaaaappa	WT_Sample4	211		3.5925			0.6018			1
MSaaaappa	WT_Sample4	212		3.2834			0.6361			1
MSaaaappa	WT_Sample4	220		4.374			0.5152			1
MSaapappp	WT_Sample4	215		4.4323
MSpaaaaap	WT_Sample4	213		3.435			0.5802			1
MSpaaaaap	WT_Sample4	214		2.7352			0.6657			1
MSpaaaaap	WT_Sample4	215		3.5925			0.5609			1
MSpaaaaap	WT_Sample4	216		2.5486			0.6885			1
MSpaaaaap	WT_Sample4	217		2.846			0.6522			1
MSpaaaaap	WT_Sample4	218		2.8169			0.6557			1
MSpaaaaap	WT_Sample4	219		2.9568			0.6386			1
MSpaaaaap	WT_Sample4	220		3.2718			0.6001			1
MSpaapaaa	WT_Sample4	209		4.2457			0.6532
MSpaapaaa	WT_Sample4	210		3.7383			0.6946
MSpaapaaa	WT_Sample4	211		3.7616			0.6927
MSpaapaaa	WT_Sample4	212		3.9424			0.6779
MSpaapaaa	WT_Sample4	213		3.0268			0.7527
MSpaapaaa	WT_Sample4	214		2.8868			0.7642
MSpaapaaa	WT_Sample4	215		2.5194			0.7942
MSpaapaaa	WT_Sample4	216		2.4028			0.8037
MSpaapaaa	WT_Sample4	217		2.6361			0.7847
MSpaapaaa	WT_Sample4	218		2.5544			0.7913
MSpaapaaa	WT_Sample4	219		2.2745			0.8142
MSpaapaaa	WT_Sample4	220		2.5486			0.7918
MSpapaapp	WT_Sample4	207		3.4409	0.5566		0.9003
ABplppaa	WT_Sample4	89			0.5421
ABplppap	WT_Sample4	89			0.5421		0.9098
ABplppaa	WT_Sample4	90			0.4962
ABplppap	WT_Sample4	90			0.4962	0.8485	0.8677
ABplppaa	WT_Sample4	94			0.4836
ABplppap	WT_Sample4	94			0.4836	0.8024	0.8588
Cpaaa	WT_Sample4	96			0.4893		0.8572
Cpaap	WT_Sample4	96			0.4893
Cpaaa	WT_Sample4	97			0.4862		0.936
Cpaap	WT_Sample4	97			0.4862		0.5068
Cpaap	WT_Sample4	98			0.5313
Caaaa	WT_Sample4	99			0.5947		0.9241
Caaap	WT_Sample4	99			0.5947
Cpaaa	WT_Sample4	99			0.4619	0.7052	0.7593
Cpaap	WT_Sample4	99			0.4619	0.9987
Caaaa	WT_Sample4	100			0.56		0.924
Caaap	WT_Sample4	100			0.56
Cpaaa	WT_Sample4	100			0.5005
Cpaap	WT_Sample4	100			0.5005		0.6371
Caaaa	WT_Sample4	102			0.5514	1.1543	0.8982
Caaap	WT_Sample4	102			0.5514	0.747
Cpaaa	WT_Sample4	103			0.5636		0.5136
Cpaap	WT_Sample4	103			0.5636
Caaaa	WT_Sample4	105			0.8436	0.7806	0.6443
Caaap	WT_Sample4	105			0.8436	0.9354	0.9461
Cpaaa	WT_Sample4	110			0.4814
Cpaap	WT_Sample4	110			0.4814		0.623
Cpaaa	WT_Sample4	113			0.495
Cpaap	WT_Sample4	113			0.495		0.7347
MSapppa	WT_Sample4	113			0.7726
MSapppp	WT_Sample4	113			0.7726	1.369	1.3525
Cpaaa	WT_Sample4	114			0.5404
Cpaap	WT_Sample4	114			0.5404		0.726
Caaaa	WT_Sample4	117			0.5877		0.9452
Caaap	WT_Sample4	117			0.5877
Caaaa	WT_Sample4	118			0.5549		0.9362
Caaap	WT_Sample4	118			0.5549
Cpaaa	WT_Sample4	118			0.6488
Cpaap	WT_Sample4	118			0.6488		0.8577
Caaaa	WT_Sample4	119			0.5523	1.5748	0.923
Caaap	WT_Sample4	119			0.5523
Cpaaa	WT_Sample4	119			0.5345
Cpaap	WT_Sample4	119			0.5345		0.7046
Cpaaa	WT_Sample4	120			0.518
Cpaap	WT_Sample4	120			0.518	0.9569	0.7885
Cpapa	WT_Sample4	121			0.5552		0.7192
Cpapp	WT_Sample4	121			0.5552
Cpapa	WT_Sample4	123			0.5081		0.552
Cpapp	WT_Sample4	123			0.5081
MSapppa	WT_Sample4	125			0.5666
MSapppp	WT_Sample4	125			0.5666	1.0681	0.9535
ABarppaapa	WT_Sample4	135			0.5425	1.3707
ABarppaapp	WT_Sample4	135			0.5425
ABalaappaa	WT_Sample4	138			0.5657	4.1552	4.2393			1
ABalaappap	WT_Sample4	138			0.5657
ABarppaapa	WT_Sample4	138			0.5096
ABarppaapp	WT_Sample4	138			0.5096
ABarppaapa	WT_Sample4	139			0.4987	1.3278
ABarppaapp	WT_Sample4	139			0.4987
ABalppapaa	WT_Sample4	147			0.4727
ABplaapaaa	WT_Sample4	153			0.4718		0.7615
ABplaapaap	WT_Sample4	153			0.4718
Cpaaaa	WT_Sample4	153			0.4644	1.3891
Cpaaap	WT_Sample4	153			0.4644		1.3071
Cpaaaa	WT_Sample4	156			0.5046	1.0352
Cpaaap	WT_Sample4	156			0.5046	0.9644	0.9484
ABalpapaaa	WT_Sample4	158			0.4875		0.5211
ABalpapaap	WT_Sample4	158			0.4875
ABplaapaaa	WT_Sample4	158			0.4815
ABplaapaap	WT_Sample4	158			0.4815
ABplaapaaa	WT_Sample4	160			0.656
ABplaapaap	WT_Sample4	160			0.656		0.7128
ABplaapaaa	WT_Sample4	161			0.8434		0.5598
Cpaaaa	WT_Sample4	161			0.5936
Cpaaap	WT_Sample4	161			0.5936	1.1728	0.5725
ABalpppaaa	WT_Sample4	162			0.4599
ABalpppaap	WT_Sample4	162			0.4599
ABplaapaaa	WT_Sample4	162			0.4736
ABplaapaap	WT_Sample4	162			0.4736
Cpaaaa	WT_Sample4	162			0.757
Cpaaap	WT_Sample4	162			0.757	2.1297	0.6003
ABpraappaa	WT_Sample4	163			0.5062
ABpraappap	WT_Sample4	163			0.5062
Caaaaa	WT_Sample4	163			0.9034
Caaaap	WT_Sample4	163			0.9034		0.5309
ABarpaapaa	WT_Sample4	164			0.5085
ABarpaapap	WT_Sample4	164			0.5085	0.7781	0.5927
ABplaaaapa	WT_Sample4	164			0.4691
ABplaaaapp	WT_Sample4	164			0.4691	0.8308	0.904
Caaaaa	WT_Sample4	164			0.8991	4.1424
Caaaap	WT_Sample4	164			0.8991	1.1263	0.5393
Caaaaa	WT_Sample4	165			0.4704	3.9727	3.8147
Caaaap	WT_Sample4	165			0.4704		0.587
ABplaapaaa	WT_Sample4	166			0.4804
ABplaapaap	WT_Sample4	166			0.4804
Caaaaa	WT_Sample4	166			0.7663
Caaaap	WT_Sample4	166			0.7663	0.9445	0.5299
Earpa	WT_Sample4	166			0.4683
Earpp	WT_Sample4	166			0.4683		0.8815
ABalapppppa	WT_Sample4	167			0.5422
ABalapppppp	WT_Sample4	167			0.5422		0.7046
ABarappaap	WT_Sample4	167			0.5039
ABarpappaa	WT_Sample4	167			0.6153		1.1562
ABarpappap	WT_Sample4	167			0.6153		1.3782
ABplaapaaa	WT_Sample4	167			0.5247	0.8318
ABplaapaap	WT_Sample4	167			0.5247
Caaaaa	WT_Sample4	167			0.8877
Caaaap	WT_Sample4	167			0.8877
MSpppaaa	WT_Sample4	167			0.4605	1.5609	1.4985			1
MSpppaap	WT_Sample4	167			0.4605
MSpppapa	WT_Sample4	167			0.8263	0.8492	1.4524			1
ABarpapapa	WT_Sample4	168			0.7336
ABarpapapp	WT_Sample4	168			0.7336	1.4555	1.3881
Caaaaa	WT_Sample4	168			0.9012
Caaaap	WT_Sample4	168			0.9012
Dapaa	WT_Sample4	168			0.6295
Dapap	WT_Sample4	168			0.6295	2.1037	2.0753
ABalpppaaa	WT_Sample4	169			0.4732
ABalpppaap	WT_Sample4	169			0.4732
Caaaaa	WT_Sample4	169			0.9214	6.0288	0.5734
Caaaap	WT_Sample4	169			0.9214		0.5779
Cpaaaa	WT_Sample4	169			0.5615		0.5004
Cpaaap	WT_Sample4	169			0.5615	4.0245	1.1266
ABarpaappa	WT_Sample4	170			0.5348	0.9659	0.8923
ABarpaappp	WT_Sample4	170			0.5348
ABplaaapaa	WT_Sample4	170			0.7691
ABplaaapap	WT_Sample4	170			0.7691		0.7804
ABplapaaaa	WT_Sample4	170			0.4721
ABplapaaap	WT_Sample4	170			0.4721		0.6168
Caaapa	WT_Sample4	170			0.4927	1.6674
Caaapp	WT_Sample4	170			0.4927
ABarpaapaa	WT_Sample4	171			0.7266
ABarpaapap	WT_Sample4	171			0.7266	0.7885	0.8625
ABarpapapa	WT_Sample4	171			0.7229
ABarpapapp	WT_Sample4	171			0.7229	1.2579	1.3903
ABplaaapaa	WT_Sample4	171			0.8241
ABplaaapap	WT_Sample4	171			0.8241	0.8331	0.8416
Caaaaa	WT_Sample4	171			0.7475	17.8021	0.9197
Caaaap	WT_Sample4	171			0.7475
Cpaaaa	WT_Sample4	171			0.5716	0.7197
Cpaaap	WT_Sample4	171			0.5716
Cpaapa	WT_Sample4	171			0.8113		0.5696
Cpaapp	WT_Sample4	171			0.8113		0.5388
ABplaaapaa	WT_Sample4	172			0.5004
ABplaaapap	WT_Sample4	172			0.5004
Caaaaa	WT_Sample4	172			0.5467	18.7739	18.7219
Caaaap	WT_Sample4	172			0.5467
Cpaapp	WT_Sample4	172			0.889		0.7573
ABarapapaaa	WT_Sample4	173			0.5791		2.1651			1
ABarapapaap	WT_Sample4	173			0.5791
ABarpaapaa	WT_Sample4	173			0.6016
ABarpaapap	WT_Sample4	173			0.6016		0.8821
ABplaaapaa	WT_Sample4	173			0.5014
ABplaaapap	WT_Sample4	173			0.5014
ABplpaaappa	WT_Sample4	173			0.8445	1.3025	1.092
ABplpaaappp	WT_Sample4	173			0.8445
ABplpappppa	WT_Sample4	173			0.6385
ABplpappppp	WT_Sample4	173			0.6385
ABprpppaaa	WT_Sample4	173			0.4951	1.3662	0.5041
ABprpppaap	WT_Sample4	173			0.4951
Caaaaa	WT_Sample4	173			0.7963	1.3559
Caaaap	WT_Sample4	173			0.7963
Caaapa	WT_Sample4	173			0.4786
Caaapp	WT_Sample4	173			0.4786
Cpaaaa	WT_Sample4	173			1.6589
Cpaaap	WT_Sample4	173			1.6589	15.2965	15.0433
Cpaapa	WT_Sample4	173			0.8987		0.5706
Cpaapp	WT_Sample4	173			0.8987		0.8128
ABarapapaaa	WT_Sample4	174			0.5752		1.7644			1
ABarapapaap	WT_Sample4	174			0.5752
ABarapapapa	WT_Sample4	174			0.4993
ABarapapapp	WT_Sample4	174			0.4993	0.9576	0.9053
ABarpaapaa	WT_Sample4	174			0.7288	0.806
ABarpaapap	WT_Sample4	174			0.7288		0.894
ABplaaapaa	WT_Sample4	174			0.5108
ABplaaapap	WT_Sample4	174			0.5108
ABplpappppa	WT_Sample4	174			0.582
ABplpappppp	WT_Sample4	174			0.582
ABplppppapp	WT_Sample4	174			0.5116
ABprppappa	WT_Sample4	174			0.5374
Caaaaa	WT_Sample4	174			0.7044	2.0409	1.3039
Caaaap	WT_Sample4	174			0.7044
Caaapa	WT_Sample4	174			0.4913	2.0506
Caaapp	WT_Sample4	174			0.4913
Cpaaaa	WT_Sample4	174			0.6351
Cpaaap	WT_Sample4	174			0.6351	1.851
Cpaapa	WT_Sample4	174			0.9036		0.5651
Cpaapp	WT_Sample4	174			0.9036		0.8297
ABalapppppa	WT_Sample4	175			0.4745
ABalapppppp	WT_Sample4	175			0.4745		0.7111
ABarapapaaa	WT_Sample4	175			0.5824		1.8831			1
ABarapapaap	WT_Sample4	175			0.5824
ABarapapapa	WT_Sample4	175			0.9676
ABarapapapp	WT_Sample4	175			0.9676		1.8629
ABarpappaa	WT_Sample4	175			0.5142
ABarpappap	WT_Sample4	175			0.5142
ABplaaapaa	WT_Sample4	175			0.465
ABplaaapap	WT_Sample4	175			0.465
Caaaap	WT_Sample4	175			0.8034		0.5746
Cpaapa	WT_Sample4	175			0.8824
Cpaapp	WT_Sample4	175			0.8824		0.8118
ABalpapaaap	WT_Sample4	176			0.5657
ABarapapaaa	WT_Sample4	176			0.5218		1.731			1
ABarapapaap	WT_Sample4	176			0.5218
ABarapapapa	WT_Sample4	176			0.9084
ABarapapapp	WT_Sample4	176			0.9084		1.4373
ABarappaaa	WT_Sample4	176			0.5074
ABarappaap	WT_Sample4	176			0.5074	0.7011	0.7569
ABarpaapaa	WT_Sample4	176			0.5749
ABarpaapap	WT_Sample4	176			0.5749		0.8614
ABarpapapa	WT_Sample4	176			0.9087
ABarpapapp	WT_Sample4	176			0.9087		1.8541
ABplaaapaa	WT_Sample4	176			0.4733
ABplaaapap	WT_Sample4	176			0.4733
Caaaaa	WT_Sample4	176			0.8132
Caaaap	WT_Sample4	176			0.8132	2.1952
Caaapa	WT_Sample4	176			0.684
Caaapp	WT_Sample4	176			0.684
Cpaaaa	WT_Sample4	176			0.5483	1.1455	0.6646
Cpaaap	WT_Sample4	176			0.5483		0.6047
Cpaapa	WT_Sample4	176			0.8518
Cpaapp	WT_Sample4	176			0.8518		0.8389
ABalpapaaap	WT_Sample4	177			0.4601
ABarapapapa	WT_Sample4	177			0.7995
ABarapapapp	WT_Sample4	177			0.7995	1.4433	1.5344
ABarpaappa	WT_Sample4	177			0.5335		0.907
ABarpaappp	WT_Sample4	177			0.5335
ABarpapapa	WT_Sample4	177			1.0372
ABarpapapp	WT_Sample4	177			1.0372	0.9248	2.0286
ABarppaapa	WT_Sample4	177			0.6458	0.8141	0.851
ABarppaapp	WT_Sample4	177			0.6458
ABplaaappa	WT_Sample4	177			0.5843		0.6639
ABplaaappp	WT_Sample4	177			0.5843
Caaaaa	WT_Sample4	177			0.5711
Caaaap	WT_Sample4	177			0.5711	23.1929	2.4345
Caaapa	WT_Sample4	177			0.6218
Caaapp	WT_Sample4	177			0.6218
Cpaaaa	WT_Sample4	177			0.7384
Cpaaap	WT_Sample4	177			0.7384	4.3014
Cpaapa	WT_Sample4	177			0.8639
Cpaapp	WT_Sample4	177			0.8639		0.8268
ABalpaappaa	WT_Sample4	178			0.5421
ABalpaappap	WT_Sample4	178			0.5421
ABalpapapaa	WT_Sample4	178			0.4598
ABalpapapap	WT_Sample4	178			0.4598		0.6473
ABarapaapaa	WT_Sample4	178			0.4844		0.5762
ABarapaapap	WT_Sample4	178			0.4844	1.4798	2.6087			1
ABarapapaaa	WT_Sample4	178			0.4917	1.2338	1.9462			1
ABarapapaap	WT_Sample4	178			0.4917
ABarpapapa	WT_Sample4	178			0.5234
ABarpapapp	WT_Sample4	178			0.5234	0.829	1.1039
ABarpappaa	WT_Sample4	178			0.493
ABarpappap	WT_Sample4	178			0.493
ABplaaapaa	WT_Sample4	178			0.4834
ABplaaapap	WT_Sample4	178			0.4834
ABplaaappa	WT_Sample4	178			0.5067
ABplaaappp	WT_Sample4	178			0.5067
ABprpapppaa	WT_Sample4	178			0.4783	0.776	1.1684
ABprpapppap	WT_Sample4	178			0.4783
ABprppppapa	WT_Sample4	178			0.4783
ABprppppapp	WT_Sample4	178			0.4783
Caaaaa	WT_Sample4	178			2.0727	25.7436
Caaaap	WT_Sample4	178			2.0727	25.9024	25.6275
Caaapa	WT_Sample4	178			0.6773
Caaapp	WT_Sample4	178			0.6773
Cpaapa	WT_Sample4	178			0.6611
Cpaapp	WT_Sample4	178			0.6611
ABalpapaaaa	WT_Sample4	179			0.7011
ABarapapaaa	WT_Sample4	179			0.5871	1.0594	3.18			1
ABarapapaap	WT_Sample4	179			0.5871
ABarpaapaa	WT_Sample4	179			0.5592
ABarpaapap	WT_Sample4	179			0.5592		0.8845
ABplaaapaa	WT_Sample4	179			0.5493
ABplaaapap	WT_Sample4	179			0.5493
ABplaapaaaa	WT_Sample4	179			0.9881		0.8125
ABplaapaaap	WT_Sample4	179			0.9881
ABplpaapaaa	WT_Sample4	179			0.4651
ABplpaapaap	WT_Sample4	179			0.4651
ABprpapppaa	WT_Sample4	179			0.7349	1.8423	1.9444
ABprpapppap	WT_Sample4	179			0.7349
Caaaaa	WT_Sample4	179			1.0303	25.9743	25.7436
Caaaap	WT_Sample4	179			1.0303	0.9066
Caaapa	WT_Sample4	179			0.6878
Caaapp	WT_Sample4	179			0.6878
Cpaaaa	WT_Sample4	179			0.5444	0.815	0.5336
Cpaaap	WT_Sample4	179			0.5444
Cpaapa	WT_Sample4	179			0.8564	16.2781
Cpaapp	WT_Sample4	179			0.8564		0.8147
ABalpapaaaa	WT_Sample4	180			0.5437
ABalpapaaap	WT_Sample4	180			0.5437		0.5852
ABarapapaaa	WT_Sample4	180			0.504		2.1206			1
ABarapapaap	WT_Sample4	180			0.504
ABarappppaa	WT_Sample4	180			0.7492	1.3166	1.219
ABarappppap	WT_Sample4	180			0.7492
ABarpaapaa	WT_Sample4	180			0.5497
ABarpaapap	WT_Sample4	180			0.5497		0.8741
ABarpaappa	WT_Sample4	180			0.4896	1.0937	0.7119
ABarpaappp	WT_Sample4	180			0.4896	0.7679
ABarpapapa	WT_Sample4	180			1.195
ABarpapapp	WT_Sample4	180			1.195	1.036	2.3944
ABplaaapaa	WT_Sample4	180			0.5362
ABplaaapap	WT_Sample4	180			0.5362
ABplaapaaaa	WT_Sample4	180			0.7831		0.5603
ABplaapaaap	WT_Sample4	180			0.7831	0.6746
Caaaaa	WT_Sample4	180			0.7601
Caaaap	WT_Sample4	180			0.7601	1.4166	0.6317
Caaapa	WT_Sample4	180			0.6326	0.9492
Caaapp	WT_Sample4	180			0.6326
Cpaaaa	WT_Sample4	180			0.763
Cpaaap	WT_Sample4	180			0.763		0.5511
Cpaapa	WT_Sample4	180			0.7087	12.6954	16.1503
Cpaapp	WT_Sample4	180			0.7087	0.6884	0.8501
ABarapapaaa	WT_Sample4	181			0.5026		1.9091			1
ABarapapaap	WT_Sample4	181			0.5026
ABarpaapaa	WT_Sample4	181			0.49
ABarpaapap	WT_Sample4	181			0.49		0.7521
ABarpapapa	WT_Sample4	181			0.6046
ABarpapapp	WT_Sample4	181			0.6046	1.1733	1.3584
ABarppaapp	WT_Sample4	181			0.6827
ABplaaapaa	WT_Sample4	181			0.8044
ABplaaapap	WT_Sample4	181			0.8044		0.8019
ABplaaappa	WT_Sample4	181			0.4573
ABplaaappp	WT_Sample4	181			0.4573		0.5775
ABplaapaaaa	WT_Sample4	181			1.0622
ABplaapaaap	WT_Sample4	181			1.0622	0.8213	1.0559
ABprpappaaa	WT_Sample4	181			0.6317
ABprppppapa	WT_Sample4	181			0.7269		0.6208
ABprppppapp	WT_Sample4	181			0.7269		0.6136
Caaaaa	WT_Sample4	181			0.9272
Caaapa	WT_Sample4	181			0.7262		0.5167
Caaapp	WT_Sample4	181			0.7262
Cpaaaa	WT_Sample4	181			0.7834
Cpaaap	WT_Sample4	181			0.7834		0.7117
ABarapapaaa	WT_Sample4	182			0.4674	0.9276	1.5733			1
ABarapapaap	WT_Sample4	182			0.4674
ABarappppaa	WT_Sample4	182			1.0612	1.8584	1.8584
ABarappppap	WT_Sample4	182			1.0612
ABarpaapaa	WT_Sample4	182			0.5731
ABarpaapap	WT_Sample4	182			0.5731	0.8414	0.892
ABarpaappp	WT_Sample4	182			0.5762
ABarpapapa	WT_Sample4	182			1.2755
ABarpapapp	WT_Sample4	182			1.2755	0.8164	2.5317
ABplaaapaa	WT_Sample4	182			0.5739
ABplaaapap	WT_Sample4	182			0.5739
ABplaapaaaa	WT_Sample4	182			0.5443
ABplaapaaap	WT_Sample4	182			0.5443
ABprppppapa	WT_Sample4	182			0.5023
ABprppppapp	WT_Sample4	182			0.5023		0.607
Caaaaa	WT_Sample4	182			0.9255
Caaapa	WT_Sample4	182			0.7195
Caaapp	WT_Sample4	182			0.7195
Cpaaaa	WT_Sample4	182			0.8297		0.7822
Cpaaap	WT_Sample4	182			0.8297
Cpapap	WT_Sample4	182			0.6523
ABalpaaaaaa	WT_Sample4	183			0.6082
ABalpaaaaap	WT_Sample4	183			0.6082	0.925	0.915
ABarapapaaa	WT_Sample4	183			0.5901		2.5009			1
ABarapapaap	WT_Sample4	183			0.5901
ABarpaappp	WT_Sample4	183			0.6529
ABarpapapa	WT_Sample4	183			0.6785
ABarpapapp	WT_Sample4	183			0.6785	1.4521	1.7154
ABarppaapa	WT_Sample4	183			0.4995	3.0488	2.8755
ABarppaapp	WT_Sample4	183			0.4995
ABplaaapaa	WT_Sample4	183			0.5995
ABplaaapap	WT_Sample4	183			0.5995
ABplaaappa	WT_Sample4	183			0.4753
ABplaaappp	WT_Sample4	183			0.4753		0.503
ABplaapaaaa	WT_Sample4	183			0.495
ABplaapaaap	WT_Sample4	183			0.495
ABplaapapaa	WT_Sample4	183			0.4582
ABplaapapap	WT_Sample4	183			0.4582
ABprpappaaa	WT_Sample4	183			0.5476
ABprppppapa	WT_Sample4	183			0.5188
Caaapa	WT_Sample4	183			0.7576		0.5808
Caaapp	WT_Sample4	183			0.7576		0.4987
Cpaaaa	WT_Sample4	183			0.7509		0.787
Cpaaap	WT_Sample4	183			0.7509	1.13
Cpaapa	WT_Sample4	183			0.619
Cpaapp	WT_Sample4	183			0.619
Cpapaa	WT_Sample4	183			0.4996
Cpapap	WT_Sample4	183			0.4996
ABarapapaaa	WT_Sample4	184			0.5558		2.1262			1
ABarapapaap	WT_Sample4	184			0.5558
ABarppaapa	WT_Sample4	184			0.4649
ABarppaapp	WT_Sample4	184			0.4649
ABplaaapaa	WT_Sample4	184			0.5106
ABplaaapap	WT_Sample4	184			0.5106
ABplaapaaaa	WT_Sample4	184			0.4649
ABplaapaaap	WT_Sample4	184			0.4649
ABplaapapaa	WT_Sample4	184			0.5747
ABplaapapap	WT_Sample4	184			0.5747
ABprppppapa	WT_Sample4	184			0.464
ABprppppapp	WT_Sample4	184			0.464		0.6127
Caaaaa	WT_Sample4	184			0.9395
Caaapa	WT_Sample4	184			0.7186
Caaapp	WT_Sample4	184			0.7186
Cpaaaa	WT_Sample4	184			0.9098		0.7379
Cpaapa	WT_Sample4	184			0.6235
Cpaapp	WT_Sample4	184			0.6235
ABalppppapa	WT_Sample4	185			0.4872
ABarapapaaa	WT_Sample4	185			0.6132	0.8126	2.5232			1
ABarapapaap	WT_Sample4	185			0.6132
ABarppaapa	WT_Sample4	185			0.5204
ABarppaapp	WT_Sample4	185			0.5204
ABplaapaaaa	WT_Sample4	185			0.491
ABplaapaaap	WT_Sample4	185			0.491
ABplaapapaa	WT_Sample4	185			0.6023
ABplaapapap	WT_Sample4	185			0.6023
ABprpappapa	WT_Sample4	185			0.5341
ABprppppapa	WT_Sample4	185			0.4667
ABprppppapp	WT_Sample4	185			0.4667		0.6502
Caaaaa	WT_Sample4	185			0.9403		0.5406
Caaapa	WT_Sample4	185			0.9268
Cpaaaa	WT_Sample4	185			0.8365		0.7647
Cpaaap	WT_Sample4	185			0.8365
Cpaapa	WT_Sample4	185			0.6545
Cpaapp	WT_Sample4	185			0.6545
Cpapaa	WT_Sample4	185			0.4574
Cpapap	WT_Sample4	185			0.4574
ABarapapaaa	WT_Sample4	186			0.5621	0.7106	1.7106			1
ABarapapaap	WT_Sample4	186			0.5621
ABarapppapa	WT_Sample4	186			0.4659
ABarapppapp	WT_Sample4	186			0.4659
ABarpaaapa	WT_Sample4	186			0.4578
ABarpaappa	WT_Sample4	186			0.6517		0.5989
ABarpaappp	WT_Sample4	186			0.6517		0.5734
ABarppaapp	WT_Sample4	186			0.7022
ABplaaapaa	WT_Sample4	186			0.4559
ABplaaapap	WT_Sample4	186			0.4559
ABplaapapaa	WT_Sample4	186			0.4963
ABplaapapap	WT_Sample4	186			0.4963
ABplpppaaaa	WT_Sample4	186			0.4615
ABplpppaaap	WT_Sample4	186			0.4615
ABprppppapa	WT_Sample4	186			0.602
Caaaaa	WT_Sample4	186			0.9349		0.5447
Caaaap	WT_Sample4	186			0.9349		0.7166
Caaapa	WT_Sample4	186			0.9114
Caaapp	WT_Sample4	186			0.9114		0.9323
Cpaaaa	WT_Sample4	186			0.8304		0.6907
Cpaaap	WT_Sample4	186			0.8304
Cpaapa	WT_Sample4	186			0.6331		0.4915
Cpaapp	WT_Sample4	186			0.6331
ABalapppppa	WT_Sample4	187			0.5155
ABalapppppp	WT_Sample4	187			0.5155		0.5068
ABalppapapa	WT_Sample4	187			0.493
ABarapppapa	WT_Sample4	187			0.4752
ABarapppapp	WT_Sample4	187			0.4752
ABarpaappa	WT_Sample4	187			0.5808	1.6545
ABarpaappp	WT_Sample4	187			0.5808		0.838
ABarppaapp	WT_Sample4	187			0.6971
ABplaaapaa	WT_Sample4	187			0.4933	0.7824
ABplaaapap	WT_Sample4	187			0.4933
ABplaapapaa	WT_Sample4	187			0.7058
ABplaapapap	WT_Sample4	187			0.7058
ABpraapaapa	WT_Sample4	187			0.5413
ABpraapaapp	WT_Sample4	187			0.5413
ABprpappaaa	WT_Sample4	187			0.6165
ABprpappapp	WT_Sample4	187			0.652
ABprppppapa	WT_Sample4	187			0.5241
ABprppppapp	WT_Sample4	187			0.5241
Caaapa	WT_Sample4	187			0.9248
Caappd	WT_Sample4	187			0.5876		0.5174
Caappv	WT_Sample4	187			0.5876
Cpaaaa	WT_Sample4	187			0.9034		0.6733
Cpaapp	WT_Sample4	187			0.636
Cpapaa	WT_Sample4	187			0.518
Cpapap	WT_Sample4	187			0.518		0.5242
ABalapppppa	WT_Sample4	188			0.5935
ABalapppppp	WT_Sample4	188			0.5935	0.8338	0.6269
ABalpaappaa	WT_Sample4	188			0.4595
ABalpaappap	WT_Sample4	188			0.4595		0.7229
ABalpaapppa	WT_Sample4	188			0.464
ABalpaapppp	WT_Sample4	188			0.464		0.5106
ABarapppapa	WT_Sample4	188			0.5914
ABarpaapaa	WT_Sample4	188			0.5044
ABarpaapap	WT_Sample4	188			0.5044		0.9117
ABarpapppa	WT_Sample4	188			0.4706
ABarpapppp	WT_Sample4	188			0.4706		0.5187
ABarppaapa	WT_Sample4	188			0.6773		0.7747
ABarppaapp	WT_Sample4	188			0.6773
ABplaapapaa	WT_Sample4	188			0.5345
ABplaapapap	WT_Sample4	188			0.5345
ABpraapaapp	WT_Sample4	188			0.5441
ABprpappaap	WT_Sample4	188			0.6108
ABprppppapa	WT_Sample4	188			0.5314
ABprppppapp	WT_Sample4	188			0.5314
Caaaap	WT_Sample4	188			0.9278		0.6125
Caaapa	WT_Sample4	188			0.8868	2.1634
Caaapp	WT_Sample4	188			0.8868		0.9119
Caappd	WT_Sample4	188			0.6584		0.6386
Caappv	WT_Sample4	188			0.6584
Cpaaaa	WT_Sample4	188			0.9364		0.7945
Cpaapa	WT_Sample4	188			0.6215	11.5571
Cpaapp	WT_Sample4	188			0.6215
Cpapaa	WT_Sample4	188			0.758
ABalpaappaa	WT_Sample4	189			0.4751
ABalpaappap	WT_Sample4	189			0.4751	0.9635	0.8766
ABalpaapppa	WT_Sample4	189			0.535
ABarapapaap	WT_Sample4	189			0.48
ABarapppapa	WT_Sample4	189			0.4571
ABarapppapp	WT_Sample4	189			0.4571
ABarpaapaa	WT_Sample4	189			0.5715	0.7726
ABarpaapap	WT_Sample4	189			0.5715		0.8697
ABarppaapa	WT_Sample4	189			0.5813		0.4919
ABarppaapp	WT_Sample4	189			0.5813
ABplaaapaa	WT_Sample4	189			0.4756
ABplaaapap	WT_Sample4	189			0.4756
ABplapaapa	WT_Sample4	189			0.4691
ABplapaapp	WT_Sample4	189			0.4691
ABplppaappa	WT_Sample4	189			0.4838
ABplppppapa	WT_Sample4	189			0.4852
ABplppppapp	WT_Sample4	189			0.4852
ABprpappaaa	WT_Sample4	189			0.6519		0.5216
ABprppppapa	WT_Sample4	189			0.5482
ABprppppapp	WT_Sample4	189			0.5482
Caaaaa	WT_Sample4	189			0.7582	2.6103	1.9399
Caaapa	WT_Sample4	189			0.7085	2.3956	2.0643
Caaapp	WT_Sample4	189			0.7085		0.9271
Cpaaaa	WT_Sample4	189			0.9256		0.7648
Cpaapa	WT_Sample4	189			0.5047	11.8487	11.2229
Cpaapp	WT_Sample4	189			0.5047
Cpapaa	WT_Sample4	189			0.5051
Cpapap	WT_Sample4	189			0.5051
MSpaaaaaa	WT_Sample4	189			0.4655		0.7067
MSpaaaaap	WT_Sample4	189			0.4655		0.5688			1
ABarapapaap	WT_Sample4	190			0.5024
ABarappaaaa	WT_Sample4	190			0.573
ABarappaaap	WT_Sample4	190			0.573					1
ABarapppapa	WT_Sample4	190			0.474
ABarapppapp	WT_Sample4	190			0.474
ABarpapppp	WT_Sample4	190			0.5865
ABplaaapaa	WT_Sample4	190			0.5765
ABplaaapap	WT_Sample4	190			0.5765
ABplaaappa	WT_Sample4	190			0.5896
ABplaaappp	WT_Sample4	190			0.5896		0.6614
ABplaapapaa	WT_Sample4	190			0.6561
ABplaapapap	WT_Sample4	190			0.6561
ABplapaapa	WT_Sample4	190			0.5162		0.5869
ABplapaapp	WT_Sample4	190			0.5162
ABpraapaapa	WT_Sample4	190			0.5686
ABpraapaapp	WT_Sample4	190			0.5686		0.5263
ABprpappaaa	WT_Sample4	190			0.6496
ABprppppapa	WT_Sample4	190			0.539
ABprppppapp	WT_Sample4	190			0.539
Caaaap	WT_Sample4	190			0.938		0.6627
Caaapa	WT_Sample4	190			0.8683
Caaapp	WT_Sample4	190			0.8683		0.8188
Caappd	WT_Sample4	190			0.4887		0.4915
Caappv	WT_Sample4	190			0.4887	0.7596	0.7596
Cpaaaa	WT_Sample4	190			0.9372	11.636	0.8487
Cpaapp	WT_Sample4	190			0.6665
Cpapaa	WT_Sample4	190			0.6593
Cpapap	WT_Sample4	190			0.6593		0.7805
MSpaaaaaa	WT_Sample4	190			0.4738		0.8072
MSpaaaaap	WT_Sample4	190			0.4738					1
ABarapapaap	WT_Sample4	191			0.6449
ABarapapapa	WT_Sample4	191			0.4979
ABarapapapp	WT_Sample4	191			0.4979		0.544
ABarappaaaa	WT_Sample4	191			0.5967
ABarappaaap	WT_Sample4	191			0.5967					1
ABarapppapa	WT_Sample4	191			0.4927
ABarpaapaa	WT_Sample4	191			0.637
ABarpaapap	WT_Sample4	191			0.637		0.9179
ABarpappaa	WT_Sample4	191			0.5296
ABarpappap	WT_Sample4	191			0.5296
ABarppaapa	WT_Sample4	191			0.6341		0.6573
ABarppaapp	WT_Sample4	191			0.6341
ABplaaappa	WT_Sample4	191			0.5969		0.7195
ABplaaappp	WT_Sample4	191			0.5969
ABplappppa	WT_Sample4	191			0.4819
ABplappppp	WT_Sample4	191			0.4819
ABplpappppa	WT_Sample4	191			0.4667
ABplpappppp	WT_Sample4	191			0.4667
ABprapaapa	WT_Sample4	191			0.4946
ABprapaapp	WT_Sample4	191			0.4946
ABprpappaaa	WT_Sample4	191			0.5405
ABprpappaap	WT_Sample4	191			0.5405
ABprpappapa	WT_Sample4	191			0.4785	0.6907	0.627
ABprpappapp	WT_Sample4	191			0.4785
ABprppppapa	WT_Sample4	191			0.5311
ABprppppapp	WT_Sample4	191			0.5311		0.4888
Caaapa	WT_Sample4	191			0.8773
Caaapp	WT_Sample4	191			0.8773		0.848
Caappv	WT_Sample4	191			0.8349
Cpaaaa	WT_Sample4	191			1.862		10.7873
Cpaaap	WT_Sample4	191			1.862
Cpaapp	WT_Sample4	191			0.647
Cpapaa	WT_Sample4	191			0.6622
Cpapap	WT_Sample4	191			0.6622		0.824
ABalaapappa	WT_Sample4	192			0.5308					1
ABalaapappp	WT_Sample4	192			0.5308		0.6655
ABarapapaap	WT_Sample4	192			1.1309		0.6867
ABarappaaaa	WT_Sample4	192			0.4892
ABarappaaap	WT_Sample4	192			0.4892					1
ABarpaapaa	WT_Sample4	192			0.6974
ABarpaapap	WT_Sample4	192			0.6974		0.9081
ABarpappaa	WT_Sample4	192			0.5026		0.549
ABarpappap	WT_Sample4	192			0.5026
ABarppaapa	WT_Sample4	192			0.6534		0.7757
ABarppaapp	WT_Sample4	192			0.6534
ABplaaappa	WT_Sample4	192			0.5151
ABplaaappp	WT_Sample4	192			0.5151
ABplaapapaa	WT_Sample4	192			0.5126
ABplaapapap	WT_Sample4	192			0.5126
ABplappppa	WT_Sample4	192			0.4682
ABplappppp	WT_Sample4	192			0.4682
ABplpappppa	WT_Sample4	192			0.4844
ABplpappppp	WT_Sample4	192			0.4844
ABpraaapapp	WT_Sample4	192			0.46					1
ABprpappaaa	WT_Sample4	192			0.5532		0.4972
ABprpappaap	WT_Sample4	192			0.5532
ABprppppapa	WT_Sample4	192			0.6041		0.721
ABprppppapp	WT_Sample4	192			0.6041
Caaapa	WT_Sample4	192			0.9128		0.5101
Caaapp	WT_Sample4	192			0.9128		0.8899
Caappd	WT_Sample4	192			0.7032		0.7602
Caappv	WT_Sample4	192			0.7032
Cpaaaa	WT_Sample4	192			1.6818	11.077	10.31
Cpaapp	WT_Sample4	192			0.68
Cpapaa	WT_Sample4	192			0.6391
Cpapap	WT_Sample4	192			0.6391		0.8078
Cpappd	WT_Sample4	192			0.6014		0.5926
Cpappv	WT_Sample4	192			0.6014		0.485
Epraa	WT_Sample4	192			0.6952	0.8597	1.2518
Eprap	WT_Sample4	192			0.6952
ABalaapappa	WT_Sample4	193			0.6819					1
ABaraaapaaa	WT_Sample4	193			0.4673
ABaraaapaap	WT_Sample4	193			0.4673
ABarapapaap	WT_Sample4	193			0.5978
ABarappapap	WT_Sample4	193			0.4837
ABarapppapa	WT_Sample4	193			0.4915
ABarapppapp	WT_Sample4	193			0.4915
ABarpaapaa	WT_Sample4	193			0.6213	0.7897
ABarppaapa	WT_Sample4	193			0.6041		0.6304
ABarppaapp	WT_Sample4	193			0.6041
ABplpappppa	WT_Sample4	193			0.4856
ABplpappppp	WT_Sample4	193			0.4856
ABplpppaaaa	WT_Sample4	193			0.4628
ABplpppaaap	WT_Sample4	193			0.4628
ABprpappaaa	WT_Sample4	193			0.6338		0.5088
ABprppppapa	WT_Sample4	193			0.4664
ABprppppapp	WT_Sample4	193			0.4664
Caaapa	WT_Sample4	193			0.8887
Caaapp	WT_Sample4	193			0.8887		0.8712
Caappv	WT_Sample4	193			0.8265
Cpaaaa	WT_Sample4	193			0.8796		0.767
Cpaaap	WT_Sample4	193			0.8796		0.5658
Cpaapp	WT_Sample4	193			0.6774
Cpapaa	WT_Sample4	193			0.5167
Cpapap	WT_Sample4	193			0.5167
Cpappd	WT_Sample4	193			0.6279		0.5782
Cpappv	WT_Sample4	193			0.6279		0.5898
ABarapaaapa	WT_Sample4	194			0.493		0.584
ABarapaaapp	WT_Sample4	194			0.493					1
ABarapapaap	WT_Sample4	194			0.6729
ABarappaaaa	WT_Sample4	194			0.5635
ABarappaaap	WT_Sample4	194			0.5635					1
ABarappapap	WT_Sample4	194			0.6623		0.5373
ABarapppapa	WT_Sample4	194			0.5228
ABarppaapa	WT_Sample4	194			0.6332		0.8042
ABarppaapp	WT_Sample4	194			0.6332
ABplaaaaapp	WT_Sample4	194			0.4724
ABplaaapaa	WT_Sample4	194			0.5402
ABplaaapap	WT_Sample4	194			0.5402
ABplpappppa	WT_Sample4	194			0.5167
ABplpappppp	WT_Sample4	194			0.5167
ABplpppaaaa	WT_Sample4	194			0.5872
ABplpppaaap	WT_Sample4	194			0.5872
ABpraapaaaa	WT_Sample4	194			0.4598
ABprpaaaapa	WT_Sample4	194			0.4569
ABprpaaaapp	WT_Sample4	194			0.4569
ABprpappaaa	WT_Sample4	194			0.5702
ABprppppapa	WT_Sample4	194			0.7408		0.7271
ABprppppapp	WT_Sample4	194			0.7408		0.5135
Caaaap	WT_Sample4	194			0.9494		0.6996
Caaapa	WT_Sample4	194			0.8683
Caaapp	WT_Sample4	194			0.8683		0.8093
Caappd	WT_Sample4	194			0.683		0.703
Caappv	WT_Sample4	194			0.683
Cpaaaa	WT_Sample4	194			0.9423		0.8588
Cpaapp	WT_Sample4	194			0.8801		0.6989
Cpapaa	WT_Sample4	194			0.5621
Cpapap	WT_Sample4	194			0.5621		0.5418
Cpappd	WT_Sample4	194			0.4835
Cpappv	WT_Sample4	194			0.4835		0.5114
ABalaapappa	WT_Sample4	195			0.498					1
ABalaapappp	WT_Sample4	195			0.498
ABalppaappa	WT_Sample4	195			0.5345					1
ABalppppaad	WT_Sample4	195			0.5241
ABaraaapppa	WT_Sample4	195			0.6277		0.4992
ABaraaapppp	WT_Sample4	195			0.6277		0.5086
ABarapaapaa	WT_Sample4	195			0.4824
ABarapapaap	WT_Sample4	195			0.9993		0.5915
ABarappaaaa	WT_Sample4	195			0.5744
ABarappaaap	WT_Sample4	195			0.5744					1
ABarappapap	WT_Sample4	195			0.5106
ABarapppapa	WT_Sample4	195			0.481
ABarpaappa	WT_Sample4	195			0.5053		0.5957
ABarpaappp	WT_Sample4	195			0.5053
ABarppaapa	WT_Sample4	195			0.6761		0.8751
ABarppaapp	WT_Sample4	195			0.6761
ABarpppapp	WT_Sample4	195			0.6097
ABplaaapaa	WT_Sample4	195			0.5643
ABplaaapap	WT_Sample4	195			0.5643
ABplaaappa	WT_Sample4	195			0.7193		0.6762
ABplaaappp	WT_Sample4	195			0.7193		0.6318
ABplaapapaa	WT_Sample4	195			0.4724
ABplaapapap	WT_Sample4	195			0.4724
ABplpappppa	WT_Sample4	195			0.4623
ABplpappppp	WT_Sample4	195			0.4623
ABplpppaaaa	WT_Sample4	195			0.6204
ABplpppaaap	WT_Sample4	195			0.6204
ABpraaapapp	WT_Sample4	195			0.4604					1
ABprpaaaapa	WT_Sample4	195			0.5402
ABprpaaaapp	WT_Sample4	195			0.5402
ABprpappaaa	WT_Sample4	195			0.6945		0.4989
Caaaap	WT_Sample4	195			0.9281		0.5984
Caaapa	WT_Sample4	195			0.8023
Caaapp	WT_Sample4	195			0.8023		0.6278
[truncated: 4,121 more rows]

## Sheet: WT_Sample5
Cell identity c	Embryo sample j	Time point T	Segmentation failure (1) or not (empty)	Quality failure (value) or not (empty)						Manually annotated apoptotic cell (1) or not (empty)
				V (μm3)	CPR	VIR	VVR	SR	FRL
Z3	WT_Sample5	159		3.0326	0.516	1.0196	0.979
Z3	WT_Sample5	161		2.2045	0.533	1.0437	0.9847
Daa	WT_Sample5	104		2.3911		1.0873	0.986
Eplpa	WT_Sample5	168		2.5894		0.9965	0.9803
Eplpp	WT_Sample5	166		2.6594		0.9954	0.9812
MSpaapp	WT_Sample5	119		2.0762			0.6349			1
MSpaapp	WT_Sample5	120		3.2543						1
MSpaapp	WT_Sample5	121		2.4611			0.5672			1
MSpaapp	WT_Sample5	124		2.5311			0.5549			1
MSpaapp	WT_Sample5	125		2.9218			0.4862			1
MSpaapp	WT_Sample5	126		2.4786			0.5641			1
MSpaapp	WT_Sample5	127		2.3386			0.5887			1
MSpaapp	WT_Sample5	128		2.4436			0.5703			1
MSpaapp	WT_Sample5	129		2.5369			0.5538			1
MSpaapp	WT_Sample5	130		2.5136			0.5579			1
MSpaapp	WT_Sample5	131		2.4903			0.5621			1
MSpaapp	WT_Sample5	132		2.257			0.6031			1
MSpaapp	WT_Sample5	133		2.2745			0.6			1
MSpaapp	WT_Sample5	134		2.5661			0.5487			1
MSpaapp	WT_Sample5	135		2.292			0.5969			1
MSpaapp	WT_Sample5	136		2.2395			0.6062			1
MSpaapp	WT_Sample5	137		2.4203			0.5744			1
MSpaapp	WT_Sample5	138		2.6011			0.5426			1
MSpaapp	WT_Sample5	139		2.6652		1.0626	0.5313			1
MSpaapp	WT_Sample5	141		3.855						1
MSpaapp	WT_Sample5	142		2.3911			0.5795			1
MSpaapp	WT_Sample5	143		2.2803			0.599			1
Caaaaa	WT_Sample5	190		3.715	0.9287		0.9441
Caapap	WT_Sample5	179		3.5575			0.5471			1
Caapap	WT_Sample5	180		3.6567			0.5345			1
Caapap	WT_Sample5	181		3.715			0.5271			1
Caapap	WT_Sample5	182		2.6244			0.6659			1
Caapap	WT_Sample5	183		2.3036			0.7068			1
Caapap	WT_Sample5	184		2.3095			0.706			1
Caapap	WT_Sample5	185		2.9393			0.6258			1
Caapap	WT_Sample5	186		2.4436			0.6889			1
Caapap	WT_Sample5	187		4.3682						1
Caapap	WT_Sample5	190		2.4319			0.6904			1
Caapap	WT_Sample5	191		2.3153			0.7053			1
Caapap	WT_Sample5	192		2.3736			0.6978			1
Caapap	WT_Sample5	193		2.4611			0.6867			1
Caapap	WT_Sample5	194		2.8169			0.6414			1
Caapap	WT_Sample5	195		2.4144			0.6927			1
Caappd	WT_Sample5	167		4.3857	0.7706		0.9454
Caappv	WT_Sample5	131		3.8841			0.7461
Caappv	WT_Sample5	132		3.9949			0.7388
Cpaaaa	WT_Sample5	195		3.2368	0.8497		0.9647
ABalaapaaa	WT_Sample5	167		2.9452			0.8305
ABalaapapa	WT_Sample5	137		4.3098						1
ABalaapapa	WT_Sample5	140		3.715						1
ABalaapapa	WT_Sample5	141		3.5575						1
ABalaapapa	WT_Sample5	142		3.5575						1
ABalaapapa	WT_Sample5	143		3.2834						1
ABalaapapa	WT_Sample5	145		2.5894		0.8084				1
ABalaapapa	WT_Sample5	147		4.0299						1
ABalaapapa	WT_Sample5	148		2.6711						1
ABalaapapa	WT_Sample5	149		2.7177						1
ABalaapapa	WT_Sample5	150		2.8227						1
ABalaapapa	WT_Sample5	151		2.7935						1
ABalaapapa	WT_Sample5	152		2.9918						1
ABalaapapa	WT_Sample5	153		3.0035						1
ABalaapapa	WT_Sample5	154		2.8169						1
ABalaapapa	WT_Sample5	155		2.4319						1
ABalaapapa	WT_Sample5	156		2.4436						1
ABalaapapa	WT_Sample5	157		2.7469						1
ABalaapapa	WT_Sample5	158		2.5661						1
ABalaapapa	WT_Sample5	159		2.6594						1
ABalaappaa	WT_Sample5	133		4.3448						1
ABalaappaa	WT_Sample5	134		3.7441						1
ABalaappaa	WT_Sample5	135		3.8433						1
ABalaappaa	WT_Sample5	136		3.2134		0.7722				1
ABalaappaa	WT_Sample5	138		3.1201						1
ABalaappaa	WT_Sample5	139		2.776			0.4873			1
ABalaappaa	WT_Sample5	140		2.8752						1
ABalaappaa	WT_Sample5	142		2.6361			0.5132			1
ABalaappaa	WT_Sample5	143		2.4786			0.5423			1
ABalaappaa	WT_Sample5	144		3.9599						1
ABalaappaa	WT_Sample5	145		2.5311			0.5326			1
ABalaappaa	WT_Sample5	146		3.3534						1
ABalaappaa	WT_Sample5	147		3.126						1
ABalaappaa	WT_Sample5	148		2.4144			0.5541			1
ABalaapppp	WT_Sample5	156		4.3565		0.8853	0.8908
ABalapapaa	WT_Sample5	136		3.2659						1
ABalapapaa	WT_Sample5	137		3.2134						1
ABalapapaa	WT_Sample5	138		3.126						1
ABalapapaa	WT_Sample5	139		2.7294						1
ABalapapaa	WT_Sample5	140		2.4844						1
ABalapapaa	WT_Sample5	141		2.6886						1
ABalapapaa	WT_Sample5	142		2.4086						1
ABalapapaa	WT_Sample5	143		2.1578						1
ABalapapaa	WT_Sample5	144		2.3211						1
ABalapapaa	WT_Sample5	145		2.3561						1
ABalapapaa	WT_Sample5	146		2.7702						1
ABalapapaa	WT_Sample5	147		2.4436						1
ABalapapaa	WT_Sample5	148		2.5486						1
ABalapapaa	WT_Sample5	149		2.3911						1
ABalapapaa	WT_Sample5	150		2.1812						1
ABalapapaa	WT_Sample5	151		2.4436						1
ABalapapaa	WT_Sample5	152		2.8985						1
ABalapapaa	WT_Sample5	153		2.6594						1
ABalapapaa	WT_Sample5	154		3.0851						1
ABalapapaa	WT_Sample5	155		2.3445						1
ABalapapaa	WT_Sample5	156		3.8666						1
ABalapapaa	WT_Sample5	157		3.4176						1
ABalapapaa	WT_Sample5	158		3.6392						1
ABalapapaa	WT_Sample5	159		3.8083						1
ABalapapaa	WT_Sample5	160		2.5661						1
ABalapapaa	WT_Sample5	161		2.3328						1
ABalappaaa	WT_Sample5	127		3.7383			0.5446			1
ABalappaaa	WT_Sample5	128		3.1959						1
ABalappaaa	WT_Sample5	129		3.5925			0.4843			1
ABalappaaa	WT_Sample5	130		4.4207			0.8265			1
ABalappaaa	WT_Sample5	132		4.2107			0.7398			1
ABalappaaa	WT_Sample5	133		3.7092			0.5325			1
ABalappaaa	WT_Sample5	134		3.1551						1
ABalappaaa	WT_Sample5	135		3.3067						1
ABalappaaa	WT_Sample5	136		4.3448			0.7952			1
ABalappaaa	WT_Sample5	139		2.7177						1
ABalappaaa	WT_Sample5	140		2.4844						1
ABalappaaa	WT_Sample5	141		2.6419						1
ABalappaaa	WT_Sample5	142		2.187						1
ABalappaaa	WT_Sample5	143		2.2395						1
ABalappaaa	WT_Sample5	144		2.2745						1
ABalappaaa	WT_Sample5	145		2.8927						1
ABalappaaa	WT_Sample5	146		2.4319						1
ABalappaaa	WT_Sample5	147		2.4086						1
ABalappaaa	WT_Sample5	148		2.2395						1
ABalappaaa	WT_Sample5	149		2.2103						1
ABalappaaa	WT_Sample5	150		2.2162						1
ABalappaaa	WT_Sample5	151		2.2103						1
ABalappaaa	WT_Sample5	152		2.2337						1
ABalappaaa	WT_Sample5	153		2.3386						1
ABalappaaa	WT_Sample5	154		2.3678						1
ABalappaaa	WT_Sample5	155		2.2512						1
ABalappaaa	WT_Sample5	156		2.2512						1
ABalappaaa	WT_Sample5	157		2.3153						1
ABalappaaa	WT_Sample5	158		2.3153						1
ABalappaaa	WT_Sample5	159		2.2861		0.6675				1
ABalappaaa	WT_Sample5	160		3.9016		0.6843	0.612			1
ABalappaaa	WT_Sample5	161		2.2453						1
ABalappaaa	WT_Sample5	162		2.1054						1
ABalpapppa	WT_Sample5	165		2.2162		0.9586	0.9297
ABalppaaaa	WT_Sample5	136		3.0618						1
ABalppaaaa	WT_Sample5	137		2.6886						1
ABalppaaaa	WT_Sample5	138		2.9743						1
ABalppaaaa	WT_Sample5	139		2.3678						1
ABalppaaaa	WT_Sample5	140		2.8868						1
ABalppaaaa	WT_Sample5	141		3.0268						1
ABalppaaaa	WT_Sample5	142		2.8052						1
ABalppaaaa	WT_Sample5	143		3.0268						1
ABalppaaaa	WT_Sample5	144		2.9685						1
ABalppaaaa	WT_Sample5	145		2.6011	0.4743					1
ABalppaaaa	WT_Sample5	146		2.4903						1
ABalppaaaa	WT_Sample5	147		2.7294						1
ABalppaaaa	WT_Sample5	148		2.4728	0.461					1
ABalppaaaa	WT_Sample5	149		2.3795						1
ABalppaaaa	WT_Sample5	150		2.4144						1
ABalppaaaa	WT_Sample5	151		2.6361						1
ABalppaaaa	WT_Sample5	152		2.5661						1
ABalppaaaa	WT_Sample5	153		2.4144						1
ABalppaaaa	WT_Sample5	154		2.4611						1
ABalppaaaa	WT_Sample5	155		2.2512						1
ABalppaaaa	WT_Sample5	156		2.292						1
ABalppaapa	WT_Sample5	138		3.7092						1
ABalppaapa	WT_Sample5	139		2.7702						1
ABalppaapa	WT_Sample5	140		2.3445						1
ABalppaapa	WT_Sample5	141		2.3503						1
ABalppaapa	WT_Sample5	142		2.3911						1
ABalppaapa	WT_Sample5	143		3.5867						1
ABalppaapa	WT_Sample5	144		2.706						1
ABalppaapa	WT_Sample5	145		2.5369						1
ABalppaapa	WT_Sample5	146		2.5019						1
ABalppaapa	WT_Sample5	147		2.6244						1
ABalppaapa	WT_Sample5	148		2.9976						1
ABalppaapa	WT_Sample5	149		2.8227						1
ABalppaapa	WT_Sample5	150		2.7294						1
ABalppaapa	WT_Sample5	151		2.6886						1
ABalppaapa	WT_Sample5	152		2.4669						1
ABalppaapa	WT_Sample5	153		2.5719						1
ABalppaapa	WT_Sample5	154		2.4261						1
ABaraaaapa	WT_Sample5	166		2.2628	0.9021	0.8263	0.9127
ABaraaaapp	WT_Sample5	143		4.199						1
ABaraaaapp	WT_Sample5	146		2.881						1
ABaraaaapp	WT_Sample5	147		2.8868						1
ABaraaaapp	WT_Sample5	148		3.3651						1
ABaraaaapp	WT_Sample5	149		2.6536						1
ABaraaaapp	WT_Sample5	150		2.5894						1
ABaraaaapp	WT_Sample5	151		2.5952						1
ABaraaaapp	WT_Sample5	152		3.435						1
ABaraaaapp	WT_Sample5	153		3.4642		0.7243				1
ABaraaaapp	WT_Sample5	155		4.304						1
ABaraaaapp	WT_Sample5	157		2.8577						1
ABaraaaapp	WT_Sample5	158		3.1843	0.4579					1
ABaraaaapp	WT_Sample5	159		3.785						1
ABaraaaapp	WT_Sample5	160		3.2368	0.4698					1
ABaraaaapp	WT_Sample5	161		2.8344						1
ABaraaaapp	WT_Sample5	162		2.8577						1
ABaraaaapp	WT_Sample5	163		2.4611						1
ABaraaaapp	WT_Sample5	164		2.8285						1
ABaraaaapp	WT_Sample5	165		2.7702						1
ABaraaaapp	WT_Sample5	166		2.5078	0.9021					1
ABaraaaapp	WT_Sample5	167		2.3095	0.4668					1
ABaraaaapp	WT_Sample5	168		2.187	0.4632		0.4856			1
ABaraaaapp	WT_Sample5	169		2.4786		1.4952				1
ABaraaaapp	WT_Sample5	171		2.5194	0.4585					1
ABaraaaapp	WT_Sample5	172		2.3795						1
ABaraaaapp	WT_Sample5	173		3.2776		1.9287				1
ABarpaaapp	WT_Sample5	143		3.126						1
ABarpaaapp	WT_Sample5	144		2.397			0.5257			1
ABarpaaapp	WT_Sample5	145		2.3211			0.5407			1
ABarpaaapp	WT_Sample5	146		2.2861			0.5476			1
ABarpaaapp	WT_Sample5	147		2.152			0.5741			1
ABarpaaapp	WT_Sample5	148		3.8375						1
ABarpaaapp	WT_Sample5	149		2.3211			0.5407			1
ABarpaaapp	WT_Sample5	150		2.2628			0.5522			1
ABarpaaapp	WT_Sample5	151		2.3036			0.5441			1
ABarpaaapp	WT_Sample5	152		2.1112			0.5822			1
ABarpaaapp	WT_Sample5	153		2.2686			0.5511			1
ABarpaaapp	WT_Sample5	154		2.1812			0.5684			1
ABarpaaapp	WT_Sample5	155		2.2395			0.5568			1
ABarpaaapp	WT_Sample5	156		2.4028			0.5245			1
ABarpaapaa	WT_Sample5	170		4.1466		0.7438	0.8509
ABarpaapaa	WT_Sample5	176		3.4992			0.8742
ABarpaappa	WT_Sample5	161		3.505	0.5979		0.9428
ABarpaappa	WT_Sample5	180		3.82	0.7744		0.9377
ABarpaappa	WT_Sample5	191		2.4844	0.8487		0.9595
ABarpaappa	WT_Sample5	192		3.0618	0.8419		0.95
ABarpaappa	WT_Sample5	194		3.8666	0.8269		0.9369
ABarpaappp	WT_Sample5	177		4.5081	0.729	0.8609	0.914
ABarpappaa	WT_Sample5	181		3.75	0.6719		0.5877
ABarpappaa	WT_Sample5	186		4.0882	0.8485		0.5505
ABarpappaa	WT_Sample5	188		3.9774	0.8175		0.5627
ABarpappap	WT_Sample5	174		2.2861	0.8066		0.9331
ABarpappap	WT_Sample5	186		4.1582	0.8485		0.8783
ABarpappap	WT_Sample5	189		3.1726	0.8455		0.9072
ABarpappap	WT_Sample5	190		3.6917	0.8374		0.892
ABarpappap	WT_Sample5	191		3.4176	0.8205		0.9
ABarpapppa	WT_Sample5	186		3.575	0.7237		0.8936
ABarpapppa	WT_Sample5	187		3.9833	0.7266		0.8815
ABarpapppa	WT_Sample5	188		3.1784	0.7488		0.9054
ABarpapppa	WT_Sample5	190		4.409	0.8808		0.8688
ABarpapppa	WT_Sample5	191		3.4875	0.899		0.8962
ABarpapppa	WT_Sample5	192		3.8141	0.8762		0.8865
ABarpapppa	WT_Sample5	193		3.1143	0.893		0.9073
ABarpapppa	WT_Sample5	194		3.505	0.9096		0.8957
ABarpapppa	WT_Sample5	195		3.715	0.9133		0.8894
ABarppaaaa	WT_Sample5	131		3.7791			0.646
ABarpppppa	WT_Sample5	179		3.3651	0.5528		0.9105
ABarpppppa	WT_Sample5	180		3.1843	0.5393		0.9153
ABarpppppa	WT_Sample5	181		3.1784	0.5839		0.9155
ABarpppppa	WT_Sample5	183		2.8635	0.5907		0.9239
ABarpppppa	WT_Sample5	184		3.2718	0.5404		0.913
ABplaaapaa	WT_Sample5	149		4.4207
ABplaaapaa	WT_Sample5	150		3.9249			0.512
ABplaaapaa	WT_Sample5	159		3.4059			0.5765
ABplaaapaa	WT_Sample5	188		4.3798	0.5488
ABplaaapaa	WT_Sample5	194		4.1349	0.5882		0.4859
ABplaaapap	WT_Sample5	195		3.2601	0.862		0.9064
ABplaappaa	WT_Sample5	194		4.2574			0.7577
ABplaappaa	WT_Sample5	195		3.0385	0.4723		0.8271
ABplpappap	WT_Sample5	132		3.7558			0.6345			1
ABplpappap	WT_Sample5	134		2.3445						1
ABplpappap	WT_Sample5	135		2.7119						1
ABplpappap	WT_Sample5	136		2.9102						1
ABplpappap	WT_Sample5	137		2.6477						1
ABplpappap	WT_Sample5	138		3.126						1
ABplpappap	WT_Sample5	139		2.4669						1
ABplpappap	WT_Sample5	140		2.8402						1
ABplpappap	WT_Sample5	141		2.4844						1
ABplpappap	WT_Sample5	142		2.2803						1
ABplpappap	WT_Sample5	143		2.2978						1
ABplpappap	WT_Sample5	144		2.362						1
ABplpappap	WT_Sample5	145		2.1753						1
ABplpappap	WT_Sample5	146		2.1578						1
ABplpappap	WT_Sample5	147		2.1812						1
ABplpappap	WT_Sample5	148		2.257						1
ABplpappap	WT_Sample5	149		2.0587						1
ABplpappap	WT_Sample5	150		2.0762						1
ABplpappap	WT_Sample5	151		2.1578						1
ABplpappap	WT_Sample5	152		2.187						1
ABplpappap	WT_Sample5	153		2.2512						1
ABplpappap	WT_Sample5	154		2.1228						1
ABplpappap	WT_Sample5	155		2.187						1
ABplpappap	WT_Sample5	156		2.1812						1
ABplpappap	WT_Sample5	157		2.2278						1
ABplpappap	WT_Sample5	158		2.2337						1
ABplpappap	WT_Sample5	159		2.1578						1
ABplpappap	WT_Sample5	160		2.1345						1
ABplpappap	WT_Sample5	161		2.1462						1
ABplpappap	WT_Sample5	162		2.2803						1
ABplpappap	WT_Sample5	163		2.1345						1
ABplpappap	WT_Sample5	164		2.0937						1
ABplpappap	WT_Sample5	165		2.0995						1
ABplpappap	WT_Sample5	166		2.2745						1
ABplpappap	WT_Sample5	167		2.292						1
ABplpappap	WT_Sample5	168		2.2103						1
ABplpappap	WT_Sample5	169		2.3386						1
ABplpappap	WT_Sample5	170		2.1462						1
ABplpappap	WT_Sample5	171		2.2861						1
ABplpappap	WT_Sample5	172		2.2978						1
ABplpappap	WT_Sample5	173		2.1753						1
ABplpappap	WT_Sample5	174		2.2337						1
ABplpappap	WT_Sample5	175		3.1551						1
ABplpappap	WT_Sample5	176		2.2628						1
ABplpappap	WT_Sample5	177		2.2745						1
ABplpappap	WT_Sample5	178		2.2395						1
ABplpappap	WT_Sample5	179		2.2745						1
ABplpappap	WT_Sample5	180		2.2045						1
ABplpappap	WT_Sample5	181		2.3795						1
ABplpappap	WT_Sample5	182		2.4261						1
ABplpappap	WT_Sample5	183		2.7585						1
ABplpappap	WT_Sample5	184		2.3736						1
ABplpappap	WT_Sample5	185		2.397						1
ABplpappap	WT_Sample5	186		2.222						1
ABplpappap	WT_Sample5	187		2.5078						1
ABplpappap	WT_Sample5	188		2.5019						1
ABplpappap	WT_Sample5	189		2.1462						1
ABplppaaap	WT_Sample5	145		3.7208						1
ABplppaaap	WT_Sample5	146		3.2834						1
ABplppaaap	WT_Sample5	147		3.0676						1
ABplppaaap	WT_Sample5	149		2.4144						1
ABplppaaap	WT_Sample5	150		2.3853						1
ABplppaaap	WT_Sample5	151		2.2803						1
ABplppaaap	WT_Sample5	152		2.2278						1
ABplppaaap	WT_Sample5	153		2.1462						1
ABplppaaap	WT_Sample5	154		2.1345						1
ABplppaaap	WT_Sample5	155		2.1054						1
ABplppaaap	WT_Sample5	156		2.2045						1
ABplppaaap	WT_Sample5	157		2.1637						1
ABplppaaap	WT_Sample5	158		2.1462						1
ABplppaaap	WT_Sample5	159		2.1112						1
ABplppaaap	WT_Sample5	160		2.1695						1
ABplppaaap	WT_Sample5	161		2.2103						1
ABplppaaap	WT_Sample5	162		2.187						1
ABplppaaap	WT_Sample5	163		3.8783						1
ABplppaaap	WT_Sample5	164		2.4028						1
ABplppaaap	WT_Sample5	165		2.3678						1
ABplppaaap	WT_Sample5	166		2.4086						1
ABplppaaap	WT_Sample5	167		3.0326						1
ABplppaaap	WT_Sample5	168		2.3678		0.8396				1
ABplppaaap	WT_Sample5	170		4.5256						1
ABplppaaap	WT_Sample5	171		2.7294						1
ABplppaaap	WT_Sample5	172		3.645						1
ABplpppapp	WT_Sample5	134		3.8899						1
ABplpppapp	WT_Sample5	135		4.4731						1
ABplpppapp	WT_Sample5	136		4.234						1
ABplpppapp	WT_Sample5	137		3.3942						1
ABplpppapp	WT_Sample5	138		2.6419						1
ABplpppapp	WT_Sample5	139		3.1843						1
ABplpppapp	WT_Sample5	140		3.3592						1
ABplpppapp	WT_Sample5	141		2.1637						1
ABplpppapp	WT_Sample5	142		2.6652						1
ABplpppapp	WT_Sample5	143		2.846						1
ABplpppapp	WT_Sample5	144		2.9043						1
ABplpppapp	WT_Sample5	145		2.9102						1
ABplpppapp	WT_Sample5	146		2.4611						1
ABplpppapp	WT_Sample5	147		2.3095						1
ABplpppapp	WT_Sample5	148		2.2628						1
ABplpppapp	WT_Sample5	149		2.3211						1
ABplpppapp	WT_Sample5	150		2.2395						1
ABplpppapp	WT_Sample5	151		3.1784						1
ABplpppapp	WT_Sample5	152		2.3911						1
ABplpppapp	WT_Sample5	153		2.6186						1
ABplpppapp	WT_Sample5	154		2.5311						1
ABplpppapp	WT_Sample5	155		2.4203						1
ABplpppapp	WT_Sample5	156		2.5544						1
ABprppaaap	WT_Sample5	133		4.3682			0.5818			1
ABprppaaap	WT_Sample5	135		3.8666		1.0243				1
ABprppaaap	WT_Sample5	142		3.2484						1
ABprppaaap	WT_Sample5	143		2.8927						1
ABprppaaap	WT_Sample5	144		2.6011						1
ABprppaaap	WT_Sample5	145		2.4319						1
ABprppaaap	WT_Sample5	146		2.3795						1
ABprppaaap	WT_Sample5	147		2.2803						1
ABprppaaap	WT_Sample5	148		2.4494						1
ABprppaaap	WT_Sample5	149		2.3853						1
ABprppaaap	WT_Sample5	150		2.6244						1
ABprppaaap	WT_Sample5	151		2.8052						1
ABprppaaap	WT_Sample5	152		2.9393		1.227				1
ABprppaaap	WT_Sample5	154		2.6652						1
ABprppaaap	WT_Sample5	155		2.4728						1
ABprppaaap	WT_Sample5	156		2.7177						1
ABprppaaap	WT_Sample5	157		2.5661		2.0612				1
ABprppaaap	WT_Sample5	159		2.3911						1
ABprppaaap	WT_Sample5	160		2.3386						1
ABprppaaap	WT_Sample5	161		2.2803						1
ABprppaaap	WT_Sample5	162		2.4144						1
ABprppaaap	WT_Sample5	163		2.4319						1
ABprppaaap	WT_Sample5	164		2.5661						1
ABprppaaap	WT_Sample5	165		2.4728						1
ABprppaaap	WT_Sample5	166		2.6419						1
ABprppaaap	WT_Sample5	167		2.5544						1
ABprppaaap	WT_Sample5	168		2.5136						1
ABprppaaap	WT_Sample5	169		3.2076						1
ABprppaaap	WT_Sample5	170		2.5136						1
ABprppaaap	WT_Sample5	171		2.5719						1
ABprppappa	WT_Sample5	154		2.082	0.5311	0.9806	0.9414
ABprppappp	WT_Sample5	159		2.8577	0.4717	0.906	0.9045
ABprpppapp	WT_Sample5	124		4.4323		0.8992				1
ABprpppapp	WT_Sample5	133		3.3067						1
ABprpppapp	WT_Sample5	134		2.4961						1
ABprpppapp	WT_Sample5	135		2.9393						1
ABprpppapp	WT_Sample5	136		2.6536						1
ABprpppapp	WT_Sample5	137		2.3036						1
ABprpppapp	WT_Sample5	138		2.6594						1
ABprpppapp	WT_Sample5	139		2.4553						1
ABprpppapp	WT_Sample5	140		3.0793						1
ABprpppapp	WT_Sample5	141		2.4086						1
ABprpppapp	WT_Sample5	142		2.4144						1
ABprpppapp	WT_Sample5	143		2.5194						1
ABprpppapp	WT_Sample5	144		2.3211						1
ABprpppapp	WT_Sample5	145		2.2803						1
ABprpppapp	WT_Sample5	146		2.2278		1.7267				1
ABprpppapp	WT_Sample5	148		2.2278						1
ABprpppapp	WT_Sample5	149		2.1987						1
ABprpppapp	WT_Sample5	150		2.2045						1
ABprpppapp	WT_Sample5	151		2.1695						1
ABprpppapp	WT_Sample5	152		2.1637						1
ABprpppppa	WT_Sample5	135		2.5836		0.7976	0.9398
MSaaappa	WT_Sample5	156		3.47						1
MSaaappa	WT_Sample5	157		3.2601						1
MSaaappa	WT_Sample5	158		2.9393						1
MSaaappa	WT_Sample5	159		2.7527						1
MSaaappa	WT_Sample5	160		2.6011						1
MSaaappa	WT_Sample5	161		2.5602						1
MSaaappa	WT_Sample5	162		2.3503						1
MSaaappa	WT_Sample5	163		2.2861						1
MSaaappa	WT_Sample5	164		2.4728						1
MSaaappa	WT_Sample5	165		2.5428						1
MSaaappa	WT_Sample5	166		2.3795						1
MSaaappa	WT_Sample5	167		2.6711						1
MSaaappa	WT_Sample5	168		2.4028						1
MSaaappa	WT_Sample5	169		2.3561						1
MSaaappa	WT_Sample5	170		2.5194	0.4566					1
MSaaappa	WT_Sample5	171		2.5194	0.5331					1
MSaaappa	WT_Sample5	172		2.5661	0.541					1
MSaaappa	WT_Sample5	173		2.2453	0.5289					1
MSaaappa	WT_Sample5	174		2.3095						1
MSaaappa	WT_Sample5	175		2.4203						1
MSaappaa	WT_Sample5	188		4.4615			0.5984
MSaappaa	WT_Sample5	192		4.3332			0.61
MSapaapa	WT_Sample5	167		4.479			0.4951			1
MSapaapa	WT_Sample5	168		2.5428			0.7133			1
MSapaapa	WT_Sample5	169		2.2045			0.7515			1
MSapaapa	WT_Sample5	170		2.2978			0.741			1
MSappapa	WT_Sample5	166		2.4144		1.8523	0.6546			1
MSappapa	WT_Sample5	169		2.8052			0.5987			1
MSappapa	WT_Sample5	170		2.6711			0.6179			1
MSappapa	WT_Sample5	171		2.7994			0.5995			1
MSappapa	WT_Sample5	172		2.4144			0.6546			1
MSappapa	WT_Sample5	173		4.1232						1
MSappapa	WT_Sample5	174		2.5952			0.6287			1
MSappapa	WT_Sample5	175		2.5602			0.6337			1
MSappapa	WT_Sample5	176		2.6186			0.6254			1
MSappapa	WT_Sample5	177		2.7294			0.6095			1
MSappapa	WT_Sample5	178		2.7294			0.6095			1
MSappapa	WT_Sample5	179		2.2686			0.6754			1
MSappapa	WT_Sample5	180		2.3503			0.6637			1
MSappapa	WT_Sample5	181		2.397			0.6571			1
MSpapppp	WT_Sample5	185		3.5925			0.925
MSppaapa	WT_Sample5	157		2.6244			0.7894			1
MSppaapa	WT_Sample5	158		2.4203			0.8058			1
MSppaapa	WT_Sample5	159		2.7585			0.7787			1
MSppaapa	WT_Sample5	160		2.6769			0.7852			1
MSppaapa	WT_Sample5	161		2.5952			0.7918			1
MSppaapa	WT_Sample5	162		2.2861			0.8166			1
MSppaapa	WT_Sample5	164		3.4992			0.7192			1
MSppaapa	WT_Sample5	165		4.4148		1.0463	0.6458			1
MSppaapa	WT_Sample5	167		2.8985			0.7674			1
MSppaapp	WT_Sample5	156		2.3211	0.8106	1.0277	0.9343
MSpppaap	WT_Sample5	179		3.2018	0.5341		0.8498
MSpppaap	WT_Sample5	181		3.505	0.5448		0.8355
MSpppaap	WT_Sample5	191		4.269	0.6151		0.7997
MSpppapa	WT_Sample5	157		3.4875			0.6608			1
MSpppapa	WT_Sample5	158		2.5311			0.7538			1
MSpppapa	WT_Sample5	159		2.397			0.7669			1
MSpppapa	WT_Sample5	160		2.1812		1.2065	0.7879			1
MSpppapa	WT_Sample5	162		2.3153			0.7748			1
MSpppapa	WT_Sample5	163		2.222			0.7839			1
ABalaaaalpa	WT_Sample5	180		4.409						1
ABalaaaalpa	WT_Sample5	185		3.1959	0.4734		0.6015			1
ABalaaaalpa	WT_Sample5	191		3.2951	0.4853		0.5891			1
ABalaaaalpa	WT_Sample5	192		2.881	0.5114		0.6407			1
ABalaaaalpa	WT_Sample5	193		3.9483	0.5286	0.9469	0.5076			1
ABalaaaarla	WT_Sample5	182		3.61			0.6045			1
ABalaaaarlp	WT_Sample5	189		2.6244	0.5347		0.7882
ABalaaaarra	WT_Sample5	183		3.9716			0.6395			1
ABalaaaarrp	WT_Sample5	191		4.2224			0.6196
ABalaaapplr	WT_Sample5	182		3.7266	0.6067	0.693	0.5449			1
ABalaaapplr	WT_Sample5	185		4.2982	0.5101					1
ABalaaapprr	WT_Sample5	195		4.0182			0.6816
ABalaapppap	WT_Sample5	186		4.3507						1
ABalaapppap	WT_Sample5	187		3.5109			0.574			1
ABalaapppap	WT_Sample5	188		3.8141			0.5372			1
ABalaapppap	WT_Sample5	189		4.2807						1
ABalaapppap	WT_Sample5	190		3.4875			0.5768			1
ABalaapppap	WT_Sample5	191		4.0241			0.5117			1
ABalaapppap	WT_Sample5	192		3.9308			0.523			1
ABalaapppap	WT_Sample5	193		3.855			0.5322			1
ABalaapppap	WT_Sample5	195		4.2632						1
ABalapaapaa	WT_Sample5	187		4.0766			0.6031
ABalapaapaa	WT_Sample5	188		2.9627	0.659		0.7115
ABalapaapaa	WT_Sample5	189		2.7352			0.7337
ABalapaapaa	WT_Sample5	190		2.986			0.7093
ABalapaapaa	WT_Sample5	191		2.4319			0.7632
ABalapaapaa	WT_Sample5	192		2.4611	0.4579		0.7604
ABalapaapaa	WT_Sample5	193		2.5894			0.7479
ABalapaapaa	WT_Sample5	194		2.4669			0.7598
ABalapaapaa	WT_Sample5	195		2.3678			0.7694
ABalapaappp	WT_Sample5	183		3.5575			0.6873
ABalapaappp	WT_Sample5	195		3.0268			0.734
ABalapapapp	WT_Sample5	190		4.4382			0.6822
ABalapappaa	WT_Sample5	195		2.1054			0.9255
ABalapapppa	WT_Sample5	185		2.8227	0.6793	0.7228	0.8101
ABalapapppp	WT_Sample5	171		3.2426			0.5925
ABalapapppp	WT_Sample5	195		3.7791			0.5251
ABalappaapp	WT_Sample5	194		2.8693			0.6866			1
ABalappaapp	WT_Sample5	195		2.986			0.6739			1
ABalappappp	WT_Sample5	184		4.2982		0.7459	0.6538
ABalappappp	WT_Sample5	193		3.3651			0.729
ABalappppap	WT_Sample5	163		2.4611		0.8698	0.8614
ABalapppppa	WT_Sample5	187		3.6975	0.5944		0.7403
ABalapppppa	WT_Sample5	188		3.2251	0.6015		0.7735
ABalapppppa	WT_Sample5	189		3.9249	0.6109		0.7243
ABalpaaaaap	WT_Sample5	193		3.3301	0.6863	1.5554	0.7402
ABalpaaaapp	WT_Sample5	183		3.9016			0.5783			1
ABalpaaaapp	WT_Sample5	184		3.0676			0.6685			1
ABalpaaaapp	WT_Sample5	185		2.5661			0.7227			1
ABalpaaaapp	WT_Sample5	186		2.6419			0.7145			1
ABalpaaaapp	WT_Sample5	187		2.6127			0.7176			1
ABalpaaaapp	WT_Sample5	188		2.4028			0.7403			1
ABalpaaaapp	WT_Sample5	189		2.4728			0.7327			1
ABalpaaaapp	WT_Sample5	190		2.397			0.7409			1
ABalpaaaapp	WT_Sample5	191		2.7877			0.6987			1
ABalpaaaapp	WT_Sample5	192		2.8285			0.6943			1
ABalpaaaapp	WT_Sample5	193		3.1668			0.6577			1
ABalpaaaapp	WT_Sample5	195		3.4584			0.6262			1
ABalpaaapap	WT_Sample5	189		2.9976			0.6393			1
ABalpaaapap	WT_Sample5	190		3.0035			0.6386			1
ABalpaaapap	WT_Sample5	191		2.7352			0.6709			1
ABalpaaapap	WT_Sample5	192		2.7877			0.6646			1
ABalpaaapap	WT_Sample5	193		2.6594			0.68			1
ABalpaaapap	WT_Sample5	194		2.2045			0.7347			1
ABalpaaapap	WT_Sample5	195		2.4028			0.7109			1
ABalpaaappa	WT_Sample5	190		2.2803			0.865			1
ABalpaaappa	WT_Sample5	191		2.4728			0.8536			1
ABalpaaappa	WT_Sample5	192		3.1609			0.8129			1
ABalpaaappa	WT_Sample5	193		3.9833			0.7642			1
ABalpaaappa	WT_Sample5	194		2.6944			0.8405			1
ABalpaaappp	WT_Sample5	185		3.75		1.1645	0.6663
ABalpapaapp	WT_Sample5	194		3.9191						1
ABalpapaapp	WT_Sample5	195		3.2951			0.5208			1
ABalpapappa	WT_Sample5	186		3.7033						1
ABalpapappa	WT_Sample5	187		4.3332						1
ABalpapappa	WT_Sample5	189		4.444						1
ABalpapappa	WT_Sample5	193		2.3328			0.6059			1
ABalpapappa	WT_Sample5	194		2.7877			0.5291			1
ABalpapappa	WT_Sample5	195		2.4378			0.5882			1
ABalpapappp	WT_Sample5	168		2.3153	0.7062		0.8567
ABalpapappp	WT_Sample5	169		3.0035	0.7166		0.8141
ABalpapappp	WT_Sample5	170		2.8985	0.7514		0.8206
ABalpappaaa	WT_Sample5	174		3.3651						1
ABalpappaaa	WT_Sample5	175		3.1901						1
ABalpappaaa	WT_Sample5	176		3.1026						1
ABalpappaaa	WT_Sample5	177		3.0093						1
ABalpappaaa	WT_Sample5	178		2.9743	0.462					1
ABalpappaaa	WT_Sample5	179		3.1376						1
ABalpappaaa	WT_Sample5	180		3.0618						1
ABalpappaaa	WT_Sample5	181		3.4117						1
ABalpappaaa	WT_Sample5	182		3.4642						1
ABalpappaaa	WT_Sample5	183		2.9627						1
ABalpappaaa	WT_Sample5	185		3.7616	0.5162					1
ABalpappaaa	WT_Sample5	186		2.7527						1
ABalpappaaa	WT_Sample5	187		2.292						1
ABalpappaaa	WT_Sample5	188		2.4728						1
ABalpappaaa	WT_Sample5	189		3.0093						1
ABalpappaaa	WT_Sample5	190		3.54	0.4568					1
ABalpappaaa	WT_Sample5	191		2.8693						1
ABalpappaaa	WT_Sample5	192		3.0443						1
ABalpappaaa	WT_Sample5	193		2.5836						1
ABalpappaaa	WT_Sample5	194		2.187	0.4569					1
ABalpappaaa	WT_Sample5	195		2.3445						1
ABalppaappa	WT_Sample5	193		3.2776	0.7313	0.853	0.766			1
ABalppaappp	WT_Sample5	184		4.0591
ABalppaappp	WT_Sample5	185		3.7966
ABalppaappp	WT_Sample5	188		2.7177	0.473		0.5951
ABalppaappp	WT_Sample5	189		3.8783
ABalppaappp	WT_Sample5	190		3.0268		0.7724	0.5491
ABalppapaap	WT_Sample5	162		3.0793		0.8032	0.7892
ABalppapapp	WT_Sample5	172		4.444	0.488		0.6694
ABalppapapp	WT_Sample5	175		3.3184	0.586		0.7531
ABalpppaaap	WT_Sample5	179		2.3561			0.7812
ABalpppaaap	WT_Sample5	180		2.8927		0.7371	0.7314
ABalpppaapd	WT_Sample5	186		4.479
ABalpppaapd	WT_Sample5	187		2.9102			0.5319
ABalpppaapd	WT_Sample5	188		4.1524
ABalpppaapd	WT_Sample5	189		3.9949	0.4706
ABalpppaapd	WT_Sample5	191		4.3157
ABalpppaapd	WT_Sample5	192		3.9424
ABalpppaapd	WT_Sample5	193		2.2278	0.6692		0.6417
ABalpppaapd	WT_Sample5	194		2.5019	0.7347		0.5976
ABalpppaapd	WT_Sample5	195		2.4903	0.7443		0.5994
ABalpppaapv	WT_Sample5	194		3.021	0.7347		0.6658			1
ABalpppaapv	WT_Sample5	195		2.8344	0.7443		0.6865			1
ABalpppappa	WT_Sample5	159		3.9483						1
ABalpppappa	WT_Sample5	161		4.5256			0.5097			1
ABalpppappa	WT_Sample5	162		3.3884						1
ABalpppappa	WT_Sample5	163		3.8666						1
ABalpppappa	WT_Sample5	165		4.1407						1
ABalpppappa	WT_Sample5	166		3.2951						1
ABalpppappa	WT_Sample5	167		3.0151						1
ABalpppappa	WT_Sample5	168		2.2453						1
ABalpppappa	WT_Sample5	169		2.8693						1
ABalpppappa	WT_Sample5	170		2.4669						1
ABalpppappa	WT_Sample5	171		2.2861						1
ABalpppappa	WT_Sample5	172		2.397						1
ABalpppappa	WT_Sample5	173		2.6127						1
ABalpppappa	WT_Sample5	174		2.4028						1
ABalpppappa	WT_Sample5	175		2.7294						1
ABalpppappa	WT_Sample5	176		4.2924						1
ABalpppappa	WT_Sample5	177		2.5952						1
ABalpppappa	WT_Sample5	178		2.9802						1
ABalpppappa	WT_Sample5	179		2.6069						1
ABalpppappa	WT_Sample5	180		2.4378						1
ABalpppappa	WT_Sample5	181		2.4961						1
ABalpppappa	WT_Sample5	182		2.5311						1
ABalpppappa	WT_Sample5	183		2.4728						1
ABalppppaad	WT_Sample5	187		4.2515			0.8201
ABalppppaav	WT_Sample5	174		3.0851			0.5424			1
ABalppppaav	WT_Sample5	175		2.6186			0.6116			1
ABalppppaav	WT_Sample5	176		3.1201			0.5372			1
ABalppppaav	WT_Sample5	177		3.2018			0.5251			1
ABalppppaav	WT_Sample5	178		2.6069			0.6133			1
ABalppppaav	WT_Sample5	179		2.5136			0.6272			1
ABalppppaav	WT_Sample5	180		2.4144			0.6419			1
ABalppppaav	WT_Sample5	181		2.3678			0.6488			1
ABalppppapa	WT_Sample5	194		2.9335	0.8513	0.7054	0.8817
ABalppppapp	WT_Sample5	162		2.3911		2.7545				1
ABalppppapp	WT_Sample5	172		3.2543						1
ABalppppapp	WT_Sample5	173		2.5369						1
ABalppppapp	WT_Sample5	174		2.5019						1
ABalppppapp	WT_Sample5	175		2.5836						1
ABalppppapp	WT_Sample5	176		2.5486						1
ABalppppapp	WT_Sample5	177		2.5311						1
ABalppppapp	WT_Sample5	178		2.5952						1
ABalppppapp	WT_Sample5	179		2.4319						1
ABalppppapp	WT_Sample5	180		2.6069						1
ABalppppapp	WT_Sample5	181		2.706						1
ABalppppapp	WT_Sample5	182		2.4203						1
ABalppppapp	WT_Sample5	183		2.3328						1
ABalppppapp	WT_Sample5	184		2.1987						1
ABalppppapp	WT_Sample5	185		2.6419						1
ABalppppapp	WT_Sample5	186		2.3095						1
ABalppppapp	WT_Sample5	187		2.2453						1
ABalppppapp	WT_Sample5	188		2.1695						1
ABalppppapp	WT_Sample5	189		2.3211						1
ABalppppapp	WT_Sample5	190		2.2978		1.1036				1
ABalppppapp	WT_Sample5	192		3.0151						1
ABalppppapp	WT_Sample5	193		2.2745						1
ABalppppapp	WT_Sample5	194		2.5311	0.8513					1
ABalppppapp	WT_Sample5	195		3.0326						1
ABalpppppap	WT_Sample5	172		2.5078	0.4669		0.7817
ABalppppppp	WT_Sample5	167		2.8227		0.8452	0.9049
ABaraaapaap	WT_Sample5	188		2.3211			0.8993
ABaraaapaap	WT_Sample5	189		2.2395		0.9731	0.9028
ABaraaapapp	WT_Sample5	185		3.056			0.8778
ABaraaapppp	WT_Sample5	192		3.855		1.0928	0.7757
ABaraapaapp	WT_Sample5	195		3.1726	0.7383		0.8826
ABaraapppaa	WT_Sample5	173		2.3795		0.6877	0.9064
ABarapaappp	WT_Sample5	195		3.7966			0.558
ABarapapaaa	WT_Sample5	178		3.9599						1
ABarapapaaa	WT_Sample5	179		3.0501						1
ABarapapaaa	WT_Sample5	180		3.1551						1
ABarapapaaa	WT_Sample5	181		2.8344						1
ABarapapaaa	WT_Sample5	182		2.4728						1
ABarapapaaa	WT_Sample5	183		3.435						1
ABarapapaaa	WT_Sample5	184		3.4817						1
ABarapapaaa	WT_Sample5	185		2.7235						1
ABarapapaaa	WT_Sample5	186		2.7352						1
ABarapapaaa	WT_Sample5	187		3.0501						1
ABarapapaaa	WT_Sample5	188		2.7935						1
ABarapapaaa	WT_Sample5	189		2.4319						1
ABarapapaaa	WT_Sample5	190		2.3736						1
ABarapapaaa	WT_Sample5	191		2.5311						1
ABarapapaaa	WT_Sample5	192		2.5428						1
ABarapapaaa	WT_Sample5	193		3.2076						1
ABarapapaaa	WT_Sample5	194		2.6186						1
ABarapapaaa	WT_Sample5	195		2.4728						1
ABarappaaap	WT_Sample5	193		4.3623			0.6967			1
ABarappaaap	WT_Sample5	194		2.846			0.8021			1
ABarappaaap	WT_Sample5	195		2.9743			0.7932			1
ABarappaapp	WT_Sample5	185		3.785						1
ABarappaapp	WT_Sample5	186		3.1026			0.5529			1
ABarappaapp	WT_Sample5	187		2.9568			0.5739			1
ABarappaapp	WT_Sample5	188		3.3067			0.5235			1
ABarappaapp	WT_Sample5	189		2.7002			0.6109			1
ABarappaapp	WT_Sample5	190		3.1143			0.5513			1
ABarappaapp	WT_Sample5	191		2.4903			0.6412			1
ABarappaapp	WT_Sample5	192		2.7352	0.5031		0.6059			1
ABarappaapp	WT_Sample5	193		2.7469			0.6042			1
ABarappaapp	WT_Sample5	194		2.6302			0.621			1
ABarappaapp	WT_Sample5	195		2.327			0.6647			1
ABarappappa	WT_Sample5	177		3.3417		0.7014	0.7853
ABarappappp	WT_Sample5	166		3.8841			0.776
ABarappappp	WT_Sample5	167		2.6711	0.4865		0.8459
ABarapppaap	WT_Sample5	194		3.6508		0.9289	0.6025
ABarapppapp	WT_Sample5	190		3.9016	0.4953	0.7644	0.6751
ABarapppapp	WT_Sample5	193		2.2978			0.8086
ABarapppapp	WT_Sample5	194		2.2103		1.2288	0.8159
ABarappppaa	WT_Sample5	166		3.6683			0.7958
ABarpapaapa	WT_Sample5	170		4.1524						1
ABarpapaapa	WT_Sample5	171		3.8899						1
ABarpapaapa	WT_Sample5	172		4.1466						1
ABarpapaapa	WT_Sample5	174		3.8025						1
ABarpapaapa	WT_Sample5	177		3.2426						1
ABarpapaapa	WT_Sample5	178		2.9685						1
ABarpapaapa	WT_Sample5	179		3.1668						1
ABarpapaapa	WT_Sample5	180		3.4584						1
ABarpapaapa	WT_Sample5	181		2.7119						1
ABarpapaapa	WT_Sample5	182		2.8052						1
ABarpapaapa	WT_Sample5	183		2.5719						1
ABarpapaapa	WT_Sample5	184		3.7966						1
ABarpapaapa	WT_Sample5	185		2.7352						1
ABarpapaapa	WT_Sample5	186		4.0066						1
ABarpapaapa	WT_Sample5	187		2.7469						1
ABarpapaapa	WT_Sample5	188		2.6652						1
ABplaaaaapa	WT_Sample5	172		3.1376						1
ABplaaaaapa	WT_Sample5	173		3.5342						1
ABplaaaaapa	WT_Sample5	174		3.2892						1
ABplaaaaapa	WT_Sample5	175		2.8518						1
ABplaaaaapa	WT_Sample5	176		2.7935						1
ABplaaaaapa	WT_Sample5	177		2.4553						1
ABplaaaaapa	WT_Sample5	178		3.0035						1
ABplaaaaapa	WT_Sample5	179		2.4844						1
ABplaaaaapa	WT_Sample5	180		2.6711						1
ABplaaaaapa	WT_Sample5	181		2.6652						1
ABplaaaaapa	WT_Sample5	182		4.0941						1
ABplaaaaapa	WT_Sample5	183		2.8752						1
ABplaaaaapa	WT_Sample5	184		2.6769						1
ABplaaaaapa	WT_Sample5	185		2.7235						1
ABplaaaaapa	WT_Sample5	186		2.4319						1
ABplaapaaap	WT_Sample5	175		2.9102	0.5625
ABplaapaaap	WT_Sample5	176		3.7441	0.5444
ABplaapaaap	WT_Sample5	177		2.8227	0.5255
ABplaapaaap	WT_Sample5	178		4.2107
ABplaapaaap	WT_Sample5	179		3.0035	0.5433
ABplaapaaap	WT_Sample5	180		2.5836	0.613	0.7166
ABplaapaaap	WT_Sample5	182		3.1843	0.4841
ABplaapaaap	WT_Sample5	183		2.6011
ABplaapaaap	WT_Sample5	184		3.4584
ABplaapaaap	WT_Sample5	185		3.3826	0.4859
ABplaapaaap	WT_Sample5	186		2.9568	0.5295
ABplaapaaap	WT_Sample5	190		2.4028	0.5835
ABplaapaaap	WT_Sample5	191		2.8577	0.5045
ABplaapaaap	WT_Sample5	192		2.9976	0.4851
ABplaapaaap	WT_Sample5	193		3.8666
ABplaapaaap	WT_Sample5	194		2.8577
ABplaapaaap	WT_Sample5	195		4.3507
ABplaapaapa	WT_Sample5	161		4.0416
ABplaapaapa	WT_Sample5	164		4.0824
ABplaapaapa	WT_Sample5	165		4.2749
ABplaapaapa	WT_Sample5	166		3.8375
ABplaapaapa	WT_Sample5	170		3.4467
ABplaapaapa	WT_Sample5	172		3.3884
ABplaapaapa	WT_Sample5	173		4.0124	0.856
ABplaapaapa	WT_Sample5	174		3.9016
ABplaapaapa	WT_Sample5	175		2.986
ABplaapaapa	WT_Sample5	178		4.2457
ABplaapaapa	WT_Sample5	192		4.2049
ABplaapaapp	WT_Sample5	173		2.2512	0.856	0.9294	0.9343
ABplaapappp	WT_Sample5	187		3.056			0.8924
ABplaapappp	WT_Sample5	188		2.397		0.758	0.9156
ABplapaaaaa	WT_Sample5	176		4.0066						1
ABplapaaaaa	WT_Sample5	181		4.409						1
ABplapaaaaa	WT_Sample5	182		3.1085						1
ABplapaaaaa	WT_Sample5	183		2.8577						1
ABplapaaaaa	WT_Sample5	184		2.9802						1
ABplapaaaaa	WT_Sample5	185		2.5544						1
ABplapaaaaa	WT_Sample5	186		2.7877						1
ABplapaaaaa	WT_Sample5	187		2.5952	0.4885					1
ABplapaaaaa	WT_Sample5	188		2.1753	0.5137					1
ABplapaaaaa	WT_Sample5	189		2.3036						1
ABplapaaaaa	WT_Sample5	190		2.2395						1
ABplapaaaaa	WT_Sample5	191		2.3095						1
ABplapaaaaa	WT_Sample5	192		2.0879						1
ABplapaaaaa	WT_Sample5	193		2.2686						1
ABplapaaaaa	WT_Sample5	194		2.1928						1
ABplapaaaaa	WT_Sample5	195		2.2162						1
ABplapapppa	WT_Sample5	175		3.8316						1
ABplapapppa	WT_Sample5	181		4.3857						1
ABplapapppa	WT_Sample5	195		4.2807						1
ABplapppaap	WT_Sample5	195		3.0968			0.661			1
ABplapppapa	WT_Sample5	183		3.3592						1
ABplapppapa	WT_Sample5	184		2.6302						1
ABplapppapa	WT_Sample5	185		3.0501						1
ABplapppapa	WT_Sample5	186		2.3853			0.5012			1
ABplapppapa	WT_Sample5	187		2.3036			0.5183			1
ABplapppapa	WT_Sample5	188		2.3795			0.5024			1
ABplapppapa	WT_Sample5	189		2.2861			0.522			1
ABplapppapa	WT_Sample5	190		2.3795			0.5024			1
ABplapppapa	WT_Sample5	191		2.3445			0.5098			1
ABplapppapa	WT_Sample5	192		2.5486						1
ABplapppapa	WT_Sample5	193		2.6127						1
ABplapppapa	WT_Sample5	194		2.5836						1
ABplapppapa	WT_Sample5	195		2.6011						1
ABplpaaaapa	WT_Sample5	171		2.7994	0.5643		0.7562
ABplpaaaapa	WT_Sample5	172		1.7846	0.5152	1.258	0.8446
ABplpaaappa	WT_Sample5	182		3.1318		0.9365	0.8704
ABplpaaappa	WT_Sample5	193		3.1376		0.7756	0.8702
ABplpaaappp	WT_Sample5	166		2.951		0.6855	0.7271
ABplpapapaa	WT_Sample5	186		3.9658		0.7576	0.7803
ABplpapapaa	WT_Sample5	193		4.1757			0.7687
ABplpapapap	WT_Sample5	165		4.4207		0.983	0.7144
ABplpappaap	WT_Sample5	177		2.6011	0.8612		0.9689
ABplpappaap	WT_Sample5	178		3.8433	0.8253	0.954	0.954
ABplpapppap	WT_Sample5	169		4.1932	0.7427	0.7184	0.7018
ABplpapppap	WT_Sample5	176		4.2165		1.8059	0.7001
ABplppaapaa	WT_Sample5	186		3.4817			0.5154			1
ABplppaapaa	WT_Sample5	187		3.68			0.4878			1
ABplppaapaa	WT_Sample5	188		2.9393	0.508		0.5909			1
ABplppaapaa	WT_Sample5	189		2.8227			0.6071			1
ABplppaapaa	WT_Sample5	190		2.5194	0.5153		0.6494			1
ABplppaapaa	WT_Sample5	191		2.4669	0.5071		0.6567			1
ABplppaapaa	WT_Sample5	192		2.4261	0.5165		0.6623			1
ABplppaapaa	WT_Sample5	193		2.4494			0.6591			1
ABplppaapaa	WT_Sample5	194		2.4903	0.4876		0.6534			1
ABplppaapaa	WT_Sample5	195		2.7352	0.4759		0.6193			1
ABplppaappp	WT_Sample5	182		3.61			0.727
ABplppaappp	WT_Sample5	183		3.4001		0.7239	0.7428
ABplppapapa	WT_Sample5	172		3.6975		0.6712	0.7613
ABplppappap	WT_Sample5	190		3.5342		1.6795	0.7035
ABplpppaapa	WT_Sample5	173		2.3503	0.5995	1.129	0.8403
ABplpppaapp	WT_Sample5	165		2.7177			0.5691
ABplpppaapp	WT_Sample5	166		2.2162		0.9912	0.6486
ABplpppaapp	WT_Sample5	174		2.8227			0.5525
ABplpppaapp	WT_Sample5	176		4.2107
ABplpppaapp	WT_Sample5	177		3.1493			0.5007
ABplpppaapp	WT_Sample5	178		4.1582
ABplpppaapp	WT_Sample5	180		4.374
ABplpppaapp	WT_Sample5	184		3.7266		1.0079
ABplpppaapp	WT_Sample5	190		4.339
ABplpppaapp	WT_Sample5	191		4.4906
ABplpppaapp	WT_Sample5	192		4.409
ABplpppaapp	WT_Sample5	194		4.4673		1.2769
ABplpppapaa	WT_Sample5	187		2.8052			0.7102
ABplpppapaa	WT_Sample5	188		2.3503			0.7572
ABplpppapaa	WT_Sample5	189		2.8985			0.7006
ABplpppapaa	WT_Sample5	190		3.1201			0.6777
ABplpppapaa	WT_Sample5	191		2.5777			0.7337
ABplpppapaa	WT_Sample5	192		3.6917		0.9446	0.6187
ABplpppapaa	WT_Sample5	194		2.8169		1.4687	0.709
ABplppppaap	WT_Sample5	183		3.2251			0.7658
ABplppppaap	WT_Sample5	184		4.2165			0.6938
ABplppppaap	WT_Sample5	185		4.1174			0.701
ABplppppaap	WT_Sample5	188		4.2749			0.6895
ABplppppapp	WT_Sample5	164		2.7294	0.5774		0.7854
ABplppppapp	WT_Sample5	166		2.327	0.5454		0.8171
ABplppppppp	WT_Sample5	195		3.5459			0.8556
ABpraaaaaaa	WT_Sample5	188		3.785			0.6877
ABpraaaaaaa	WT_Sample5	189		2.951			0.7565
ABpraaaaaaa	WT_Sample5	190		4.199			0.6535
ABpraaaaapd	WT_Sample5	192		3.5284
ABpraaaaapd	WT_Sample5	193		3.2193	0.4759		0.4898
ABpraaaaapd	WT_Sample5	194		3.1901			0.4945
ABpraaaaapd	WT_Sample5	195		3.9133
ABpraaaapad	WT_Sample5	183		3.5808			0.6413
ABpraaaapad	WT_Sample5	191		2.2395			0.7756
ABpraaaapad	WT_Sample5	192		4.2982			0.5694
ABpraaaappa	WT_Sample5	177		4.2399						1
ABpraaaappa	WT_Sample5	178		3.61						1
ABpraaaappa	WT_Sample5	179		3.9191						1
ABpraaaappa	WT_Sample5	180		3.0793						1
ABpraaaappa	WT_Sample5	181		2.5952						1
ABpraaaappa	WT_Sample5	182		2.8402						1
ABpraaaappa	WT_Sample5	183		2.9743						1
ABpraaaappa	WT_Sample5	184		3.7033						1
ABpraaaappa	WT_Sample5	185		3.645						1
ABpraaaappa	WT_Sample5	186		2.5194						1
ABpraaaappa	WT_Sample5	187		3.1026						1
ABpraaaappa	WT_Sample5	188		2.811	0.6129					1
ABpraaaappa	WT_Sample5	189		2.6769	0.5222					1
ABpraaaappa	WT_Sample5	190		2.7119						1
ABpraaaappa	WT_Sample5	191		2.7294						1
ABpraaaappa	WT_Sample5	192		2.5836						1
ABpraaaappa	WT_Sample5	193		2.6536	0.5183					1
ABpraaaappa	WT_Sample5	194		3.1376						1
ABpraaaappa	WT_Sample5	195		3.1085						1
ABpraaapaav	WT_Sample5	187		4.0532			0.5908			1
ABpraaapaav	WT_Sample5	188		2.7819			0.7192			1
ABpraaapaav	WT_Sample5	189		2.4086			0.7568			1
ABpraaapaav	WT_Sample5	190		2.7119			0.7262			1
ABpraaapaav	WT_Sample5	191		3.0676			0.6903			1
ABpraaapaav	WT_Sample5	192		2.3561			0.7621			1
ABpraaapaav	WT_Sample5	193		3.126			0.6844			1
ABpraaapaav	WT_Sample5	194		4.0416			0.592			1
ABpraaapaav	WT_Sample5	195		2.4728			0.7504			1
ABpraaapapp	WT_Sample5	179		3.8491						1
ABpraaapapp	WT_Sample5	180		2.8402						1
ABpraaapapp	WT_Sample5	181		3.2543						1
ABpraaapapp	WT_Sample5	182		3.0501						1
ABpraaapapp	WT_Sample5	183		3.4759						1
ABpraaapapp	WT_Sample5	184		3.3184						1
ABpraaapapp	WT_Sample5	185		3.056						1
ABpraaapapp	WT_Sample5	186		2.6419						1
ABpraaapapp	WT_Sample5	187		2.7702						1
ABpraaapapp	WT_Sample5	188		3.0326						1
ABpraaapapp	WT_Sample5	189		2.4261						1
ABpraaapapp	WT_Sample5	190		2.9335						1
ABpraaapapp	WT_Sample5	191		2.6536						1
ABpraaapapp	WT_Sample5	192		2.6069						1
ABpraaapapp	WT_Sample5	193		2.6477						1
ABpraaapapp	WT_Sample5	194		2.5952						1
ABpraaapapp	WT_Sample5	195		2.6011						1
ABpraaappap	WT_Sample5	191		2.6069		1.391	0.7707
ABpraaappap	WT_Sample5	193		3.6742			0.6768
ABpraapaaaa	WT_Sample5	187		4.2282	0.5479		0.5243
ABpraapaaap	WT_Sample5	189		3.8958	0.5757
ABpraapaaap	WT_Sample5	191		4.3507
ABpraapaaap	WT_Sample5	193		3.7092
ABpraapaapa	WT_Sample5	162		3.47			0.5087
ABpraapappa	WT_Sample5	166		2.5661		0.8763	0.7673
ABprapaaaaa	WT_Sample5	169		4.269						1
ABprapaaaaa	WT_Sample5	178		4.1232						1
ABprapaaaaa	WT_Sample5	180		3.2543						1
ABprapaaaaa	WT_Sample5	181		2.5894						1
ABprapaaaaa	WT_Sample5	182		2.4903						1
ABprapaaaaa	WT_Sample5	183		2.3153						1
ABprapaaaaa	WT_Sample5	184		2.6711						1
ABprapaaaaa	WT_Sample5	185		2.6011						1
ABprapaaaaa	WT_Sample5	186		2.5019						1
ABprapaaaaa	WT_Sample5	187		2.4553						1
ABprapaaaaa	WT_Sample5	188		2.6069						1
ABprapaaaaa	WT_Sample5	189		2.8402		3.9943				1
ABprapaaaaa	WT_Sample5	191		2.5894						1
ABprapaaaaa	WT_Sample5	192		2.4786						1
ABprapaaaaa	WT_Sample5	193		2.4378						1
ABprapaaaaa	WT_Sample5	194		2.4319						1
ABprapaaaaa	WT_Sample5	195		2.2337						1
ABprapppapa	WT_Sample5	183		3.8316						1
ABprapppapa	WT_Sample5	184		2.4378			0.6207			1
ABprapppapa	WT_Sample5	185		2.5194			0.608			1
ABprapppapa	WT_Sample5	186		2.2453			0.6506			1
ABprapppapa	WT_Sample5	187		2.7702			0.569			1
ABprapppapa	WT_Sample5	188		2.5369			0.6053			1
ABprapppapa	WT_Sample5	189		2.8693			0.5535			1
ABprapppapa	WT_Sample5	190		2.3911			0.6279			1
ABprapppapa	WT_Sample5	191		2.4261			0.6225			1
ABprapppapa	WT_Sample5	192		2.4436			0.6198			1
ABprapppapa	WT_Sample5	193		2.3561			0.6334			1
ABprapppapa	WT_Sample5	194		2.2337			0.6525			1
ABprapppapa	WT_Sample5	195		2.4086			0.6252			1
ABprpaaaaaa	WT_Sample5	193		3.3884			0.6785
ABprpaaaapp	WT_Sample5	163		4.3682	0.5532		0.6606
ABprpaaaapp	WT_Sample5	166		4.1815			0.6751
ABprpaaaapp	WT_Sample5	180		2.6127	0.4598		0.797
ABprpaaaapp	WT_Sample5	185		3.7733			0.7068
ABprpaapapa	WT_Sample5	195		2.5777	0.7138		0.8455
ABprpappapa	WT_Sample5	168		2.9043	0.6933	0.8878	0.8352
ABprppaaaap	WT_Sample5	191		2.5894		0.8756	0.8994
ABprppaapaa	WT_Sample5	189		2.3153	0.4795		0.7971			1
ABprppaapaa	WT_Sample5	190		2.9743	0.4966		0.7394			1
ABprppaapaa	WT_Sample5	191		3.0501	0.4861		0.7328			1
ABprppaapaa	WT_Sample5	192		2.6594			0.767			1
ABprppaapaa	WT_Sample5	193		2.9627	0.4911		0.7404			1
ABprppaapaa	WT_Sample5	194		2.3911	0.5224		0.7905			1
ABprppaapaa	WT_Sample5	195		2.6419	0.4888		0.7685			1
ABprppaappa	WT_Sample5	182		2.6594		1.0238	0.7587
ABprppaappp	WT_Sample5	176		2.6886	0.6652	0.668	0.788
ABprppapaap	WT_Sample5	191		2.9043		1.3043	0.8362
ABprpppaaap	WT_Sample5	186		4.5081	0.6148		0.596
ABprpppaapp	WT_Sample5	166		3.1959		1.1077
ABprpppaapp	WT_Sample5	175		4.4207
ABprpppaapp	WT_Sample5	184		3.61
ABprpppaapp	WT_Sample5	185		2.7002
ABprpppaapp	WT_Sample5	186		2.986
ABprpppaapp	WT_Sample5	188		2.2453			0.559
ABprpppaapp	WT_Sample5	189		2.5602			0.4971
ABprpppaapp	WT_Sample5	190		3.2251		0.7995
ABprpppaapp	WT_Sample5	193		2.8577
ABprpppapaa	WT_Sample5	182		3.785			0.7238
ABprppppapp	WT_Sample5	188		2.3095	0.5842		0.8805
ABprppppapp	WT_Sample5	189		3.2134	0.6085	0.7418	0.8338
ABprppppppa	WT_Sample5	181		4.234			0.5443			1
MSaaaappa	WT_Sample5	181		3.1026						1
MSaaaappa	WT_Sample5	182		2.4144			0.5433			1
MSaaaappa	WT_Sample5	183		2.951						1
MSaaaappa	WT_Sample5	184		2.9802						1
MSaaaappa	WT_Sample5	185		2.0995			0.6029			1
MSaaaappa	WT_Sample5	186		1.9246			0.636			1
MSaaaappa	WT_Sample5	187		2.0587			0.6106			1
MSaaaappa	WT_Sample5	188		2.4203			0.5422			1
MSaaaappa	WT_Sample5	189		2.7527						1
MSaaaappa	WT_Sample5	190		2.7819						1
MSaaaappa	WT_Sample5	191		2.397			0.5466			1
MSaaaappa	WT_Sample5	192		2.2803			0.5687			1
MSaaaappa	WT_Sample5	193		2.5078			0.5256			1
MSaaaappa	WT_Sample5	194		2.4028			0.5455			1
MSaaaappa	WT_Sample5	195		2.4436			0.5378			1
MSaapaapa	WT_Sample5	191		2.4261	0.6672		0.9211
MSpaaaaap	WT_Sample5	191		3.5284			0.6176			1
MSpaaaaap	WT_Sample5	192		2.2745			0.7535			1
MSpaaaaap	WT_Sample5	193		2.3445			0.7459			1
MSpaaaaap	WT_Sample5	194		2.8169	0.541		0.6947			1
MSpaaaaap	WT_Sample5	195		3.1784			0.6555			1
MSpaapaap	WT_Sample5	194		3.0385			0.8015			1
MSpaapaap	WT_Sample5	195		2.6827			0.8248			1
MSpapappa	WT_Sample5	192		3.0793	0.7382	0.8817	0.925
ABalaapa	WT_Sample5	68			0.6437
ABalaapp	WT_Sample5	68			0.6437	1.2532	1.2491
ABalaapa	WT_Sample5	71			0.5629		1.4585
ABalaapp	WT_Sample5	71			0.5629
ABalaapa	WT_Sample5	72			0.5626	1.4602	1.4523
ABalaapp	WT_Sample5	72			0.5626
MSaaaa	WT_Sample5	77			0.5284		0.8793
MSaaap	WT_Sample5	77			0.5284
MSaaaa	WT_Sample5	78			0.5143	0.8741	0.9045
MSaaap	WT_Sample5	78			0.5143
ABalpaaa	WT_Sample5	80			0.5553
ABalpaap	WT_Sample5	80			0.5553	0.8715	0.8555
MSaaaa	WT_Sample5	83			0.4792	0.9317	0.853
MSaaap	WT_Sample5	83			0.4792
ABplaaaa	WT_Sample5	84			0.4828
ABplaaap	WT_Sample5	84			0.4828	1.0416	1.0303
Daa	WT_Sample5	85			0.6018
Dap	WT_Sample5	85			0.6018	0.7802	0.9509
Daa	WT_Sample5	87			0.6027
Dap	WT_Sample5	87			0.6027	0.7603	0.936
ABalaapaaa	WT_Sample5	132			0.4731		0.6916
ABalaapaap	WT_Sample5	132			0.4731
ABplpppppa	WT_Sample5	140			0.47
ABplpppppp	WT_Sample5	140			0.47
ABalppaaap	WT_Sample5	145			0.4743
ABalppaaap	WT_Sample5	148			0.461
ABalaaaarl	WT_Sample5	152			0.4641
ABalaaaarr	WT_Sample5	152			0.4641
ABarpaapaa	WT_Sample5	153			0.6579
ABarpaapap	WT_Sample5	153			0.6579		0.8163
ABarpaappa	WT_Sample5	153			0.4828		1.0062
ABarpaappp	WT_Sample5	153			0.4828
ABprppapaa	WT_Sample5	154			0.4789
ABprppapap	WT_Sample5	154			0.4789	1.1518	1.1524
ABprppappp	WT_Sample5	154			0.5311
MSppaapa	WT_Sample5	156			0.8106					1
ABaraaaapa	WT_Sample5	158			0.4579
ABarpaapaa	WT_Sample5	158			0.4882
ABarpaapap	WT_Sample5	158			0.4882	1.3616	0.6336
ABplpppppa	WT_Sample5	158			0.5452
ABplpppppp	WT_Sample5	158			0.5452
ABarpaappa	WT_Sample5	159			0.4961		0.9134
ABarpaappp	WT_Sample5	159			0.4961
ABprppappa	WT_Sample5	159			0.4717
Ealpa	WT_Sample5	159			0.4768	0.9718	0.9718
Ealpp	WT_Sample5	159			0.4768
Z2	WT_Sample5	159			0.516
ABaraaaapa	WT_Sample5	160			0.4698
ABarpaapaa	WT_Sample5	160			0.5567
ABarpaapap	WT_Sample5	160			0.5567		0.9454
ABarpaappa	WT_Sample5	160			0.6759		0.9187
ABarpaappp	WT_Sample5	160			0.6759
ABplpaaaapa	WT_Sample5	160			0.5296
ABplpaaaapp	WT_Sample5	160			0.5296		0.6509
ABarpaappp	WT_Sample5	161			0.5979
Ealpa	WT_Sample5	161			0.5073	1.0962	1.0747
Ealpp	WT_Sample5	161			0.5073
Z2	WT_Sample5	161			0.533
ABalapaappa	WT_Sample5	162			0.4875
ABalapaappp	WT_Sample5	162			0.4875	1.3977	0.8949
ABarpaapaa	WT_Sample5	162			0.5251	0.7456
ABarpaapap	WT_Sample5	162			0.5251	1.4216	0.8708
ABarpaappa	WT_Sample5	162			0.6753		0.9139
ABarpaappp	WT_Sample5	162			0.6753	2.3627
ABarpappaa	WT_Sample5	162			0.4744
ABarpappap	WT_Sample5	162			0.4744
ABplaaapaa	WT_Sample5	162			0.5208
ABplaaapap	WT_Sample5	162			0.5208	0.7237
ABprpaapppa	WT_Sample5	162			0.5602
ABprpaapppp	WT_Sample5	162			0.5602
ABalapaappa	WT_Sample5	163			0.4772
ABalapaappp	WT_Sample5	163			0.4772		2.2927
ABarpaapaa	WT_Sample5	163			0.6327		0.758
ABarpaapap	WT_Sample5	163			0.6327		0.5508
ABplaaappa	WT_Sample5	163			0.4984
ABplaaappp	WT_Sample5	163			0.4984
ABprpaaaapa	WT_Sample5	163			0.5532
ABprpaapppa	WT_Sample5	163			0.5559
ABprpaapppp	WT_Sample5	163			0.5559
ABalapaappa	WT_Sample5	164			0.6073
ABalapaappp	WT_Sample5	164			0.6073		2.0579
ABarpaapaa	WT_Sample5	164			0.5719
ABarpaapap	WT_Sample5	164			0.5719		0.6838
ABplaaappa	WT_Sample5	164			0.5377
ABplaaappp	WT_Sample5	164			0.5377		0.514
ABplaapapaa	WT_Sample5	164			0.5802
ABplaapapap	WT_Sample5	164			0.5802
ABplppppapa	WT_Sample5	164			0.5774
ABalpappaaa	WT_Sample5	165			0.6629		1.3978			1
ABalpappaap	WT_Sample5	165			0.6629	1.012	1.0863
ABarpaapaa	WT_Sample5	165			0.596
ABarpaapap	WT_Sample5	165			0.596		0.7462
ABarpppppa	WT_Sample5	165			0.5136	1.212	0.6652
ABarpppppp	WT_Sample5	165			0.5136
ABplaapapaa	WT_Sample5	165			0.4954
ABplaapapap	WT_Sample5	165			0.4954		0.4871
ABplppppapa	WT_Sample5	165			0.5132
ABplppppapp	WT_Sample5	165			0.5132		0.5938
ABprpaapppa	WT_Sample5	165			0.4869
ABprpaapppp	WT_Sample5	165			0.4869
ABarpaapaa	WT_Sample5	166			0.7217
ABarpaapap	WT_Sample5	166			0.7217		0.8546
ABarpaappa	WT_Sample5	166			0.5062		1.4484
ABarpaappp	WT_Sample5	166			0.5062
ABplaapapaa	WT_Sample5	166			0.4625
ABplaapapap	WT_Sample5	166			0.4625
ABplppppapa	WT_Sample5	166			0.5454
ABprpaapppa	WT_Sample5	166			0.5753
ABprpaapppp	WT_Sample5	166			0.5753
ABalpapappa	WT_Sample5	167			0.4966					1
ABalpapappp	WT_Sample5	167			0.4966		0.583
ABaraaaapa	WT_Sample5	167			0.4668
ABarappappa	WT_Sample5	167			0.4865
ABarpaapaa	WT_Sample5	167			0.7255
ABarpaapap	WT_Sample5	167			0.7255	1.2748	0.8486
ABarpaappa	WT_Sample5	167			0.4565	2.2945	1.3876
ABarpaappp	WT_Sample5	167			0.4565
ABplpaaaapa	WT_Sample5	167			0.6331
ABplpaaaapp	WT_Sample5	167			0.6331		0.6582
ABprpaapppa	WT_Sample5	167			0.6079
ABprpaapppp	WT_Sample5	167			0.6079
Caappv	WT_Sample5	167			0.7706
ABalpapappa	WT_Sample5	168			0.7062					1
ABaraaaapa	WT_Sample5	168			0.4632
ABarpaappa	WT_Sample5	168			0.4942		0.9068
ABarpaappp	WT_Sample5	168			0.4942
ABplpapppaa	WT_Sample5	168			0.6255		0.7592
ABplpapppap	WT_Sample5	168			0.6255
ABprpaapppa	WT_Sample5	168			0.52
ABprpaapppp	WT_Sample5	168			0.52
ABprpappapp	WT_Sample5	168			0.6933
ABprpapppaa	WT_Sample5	168			0.573	1.0575	0.8433
ABprpapppap	WT_Sample5	168			0.573		0.7591
Caappd	WT_Sample5	168			0.7582	0.9873	0.9198
Caappv	WT_Sample5	168			0.7582
ABalpapappa	WT_Sample5	169			0.7166					1
ABarpappaa	WT_Sample5	169			0.4614
ABarpappap	WT_Sample5	169			0.4614
ABplpaaaapa	WT_Sample5	169			0.5497		0.5185
ABplpaaaapp	WT_Sample5	169			0.5497
ABplpapppaa	WT_Sample5	169			0.7427	0.7484	0.6825
ABprpaapppa	WT_Sample5	169			0.568
ABprpaapppp	WT_Sample5	169			0.568
ABalpapappa	WT_Sample5	170			0.7514					1
ABprpaapppa	WT_Sample5	170			0.6667
ABprpaapppp	WT_Sample5	170			0.6667
MSaaappp	WT_Sample5	170			0.4566
ABalpapappa	WT_Sample5	171			0.5852					1
ABalpapappp	WT_Sample5	171			0.5852		0.5177
ABaraaaapa	WT_Sample5	171			0.4585
ABarpppppa	WT_Sample5	171			0.5609	0.8454	0.8741
ABarpppppp	WT_Sample5	171			0.5609
ABplpaaaapp	WT_Sample5	171			0.5643
ABpraaaaaa	WT_Sample5	171			0.4727		0.5311
ABpraaaaap	WT_Sample5	171			0.4727
ABprpaapppa	WT_Sample5	171			0.6922
ABprpaapppp	WT_Sample5	171			0.6922
MSaaappp	WT_Sample5	171			0.5331
ABalapappaa	WT_Sample5	172			0.96		0.6877
ABalapappap	WT_Sample5	172			0.96	1.9337	2.1123
ABalpapappa	WT_Sample5	172			0.4854					1
ABalpapappp	WT_Sample5	172			0.4854
ABalppapapa	WT_Sample5	172			0.488
ABalpppppaa	WT_Sample5	172			0.4669
ABplpaaaapp	WT_Sample5	172			0.5152
ABplppapaaa	WT_Sample5	172			0.5048
ABplppapaap	WT_Sample5	172			0.5048		0.7608
ABprpaapppa	WT_Sample5	172			0.6698
ABprpaapppp	WT_Sample5	172			0.6698
MSaaappp	WT_Sample5	172			0.541
ABarpappaa	WT_Sample5	173			0.4573
ABarpappap	WT_Sample5	173			0.4573
ABplaaappa	WT_Sample5	173			0.5938
ABplaaappp	WT_Sample5	173			0.5938		0.5674
ABplpppaaaa	WT_Sample5	173			0.4956
ABplpppaaap	WT_Sample5	173			0.4956
ABplpppaapp	WT_Sample5	173			0.5995	0.7434
ABpraaaaaaa	WT_Sample5	173			0.4849
ABpraaaaaap	WT_Sample5	173			0.4849		0.5469
ABprpaapppa	WT_Sample5	173			0.661
ABprpaapppp	WT_Sample5	173			0.661
Caaapa	WT_Sample5	173			0.4933
Caaapp	WT_Sample5	173			0.4933		0.6292
Caappd	WT_Sample5	173			0.5586	0.7341	0.726
Caappv	WT_Sample5	173			0.5586
MSaaappp	WT_Sample5	173			0.5289
ABarpaapaa	WT_Sample5	174			0.6086
ABarpaapap	WT_Sample5	174			0.6086	0.6714	0.9603
ABarpaappa	WT_Sample5	174			0.7471		0.9168
ABarpaappp	WT_Sample5	174			0.7471
ABarpappaa	WT_Sample5	174			0.8066
ABarpppppa	WT_Sample5	174			0.4866		0.6001
ABarpppppp	WT_Sample5	174			0.4866
ABplaaappa	WT_Sample5	174			0.6314		0.5789
ABplaaappp	WT_Sample5	174			0.6314		0.4906
ABplaapaaaa	WT_Sample5	174			0.4649
ABplaapaaap	WT_Sample5	174			0.4649
ABplpppaaaa	WT_Sample5	174			0.4581
ABplpppaaap	WT_Sample5	174			0.4581
ABprapapppa	WT_Sample5	174			0.5138					1
ABprapapppp	WT_Sample5	174			0.5138
ABprpaapppa	WT_Sample5	174			0.6743
ABprpaapppp	WT_Sample5	174			0.6743
ABprppaappa	WT_Sample5	174			0.4657
ABprppaappp	WT_Sample5	174			0.4657
ABalppapapa	WT_Sample5	175			0.586
ABarpaappa	WT_Sample5	175			0.6314		0.6549
ABarpaappp	WT_Sample5	175			0.6314		0.4907
ABarpappaa	WT_Sample5	175			0.5985
ABarpappap	WT_Sample5	175			0.5985		0.5667
ABplaaappa	WT_Sample5	175			0.5817
ABplaaappp	WT_Sample5	175			0.5817		0.5783
ABplaapaaaa	WT_Sample5	175			0.5625
ABplpppaaaa	WT_Sample5	175			0.4749
ABplpppaaap	WT_Sample5	175			0.4749
ABprpaapppa	WT_Sample5	175			0.5677
ABprpaapppp	WT_Sample5	175			0.5677
Caappd	WT_Sample5	175			0.4651		0.607
Caappv	WT_Sample5	175			0.4651
MSpppaaa	WT_Sample5	175			0.5434		0.6046			1
MSpppaap	WT_Sample5	175			0.5434
ABarpaappa	WT_Sample5	176			0.5663		0.6795
ABarpaappp	WT_Sample5	176			0.5663
ABarpappaa	WT_Sample5	176			0.5352
ABarpappap	WT_Sample5	176			0.5352
ABarpppppa	WT_Sample5	176			0.4598		0.4832
ABarpppppp	WT_Sample5	176			0.4598
ABplaaappa	WT_Sample5	176			0.5671		0.6518
ABplaaappp	WT_Sample5	176			0.5671
ABplaapaaaa	WT_Sample5	176			0.5444
ABprpaapppa	WT_Sample5	176			0.6851
ABprpaapppp	WT_Sample5	176			0.6851
ABprppaappa	WT_Sample5	176			0.6652
MSpappaa	WT_Sample5	176			0.544	0.8855	1.2758
MSpappap	WT_Sample5	176			0.544
ABarpaappa	WT_Sample5	177			0.729		0.4996
ABarpappaa	WT_Sample5	177			0.5723
ABarpappap	WT_Sample5	177			0.5723		0.537
ABarpppppa	WT_Sample5	177			0.5751		0.8266
ABarpppppp	WT_Sample5	177			0.5751
ABplaapaaaa	WT_Sample5	177			0.5255
ABplpappaaa	WT_Sample5	177			0.8612
ABprpaapppa	WT_Sample5	177			0.6908
ABprpaapppp	WT_Sample5	177			0.6908
ABprpappapa	WT_Sample5	177			1.3499
ABprpappapp	WT_Sample5	177			1.3499		4.0281
Cpaaaa	WT_Sample5	177			0.5745		0.688
Cpaaap	WT_Sample5	177			0.5745
MSaappaa	WT_Sample5	177			1.0716
MSaappap	WT_Sample5	177			1.0716	1.1674	0.9998
MSpppaaa	WT_Sample5	177			0.7025		0.511			1
MSpppaap	WT_Sample5	177			0.7025		0.7589
ABalpappaap	WT_Sample5	178			0.462
ABarpappaa	WT_Sample5	178			0.6448
ABarpappap	WT_Sample5	178			0.6448		0.5853
ABarpapppa	WT_Sample5	178			0.4796		0.6277
ABarpapppp	WT_Sample5	178			0.4796
ABplpappaaa	WT_Sample5	178			0.8253
ABpraapapaa	WT_Sample5	178			0.5125
ABpraapapap	WT_Sample5	178			0.5125	1.1641	1.029
ABprpaapppa	WT_Sample5	178			0.6785
ABprpaapppp	WT_Sample5	178			0.6785
ABprpappapa	WT_Sample5	178			1.2003
ABprpappapp	WT_Sample5	178			1.2003	3.4307	3.5531
ABprppppaaa	WT_Sample5	178			0.5196
ABprppppaap	WT_Sample5	178			0.5196		0.6546
Cpaaaa	WT_Sample5	178			0.5288
Cpaaap	WT_Sample5	178			0.5288		0.5664
Cpaapa	WT_Sample5	178			0.4658
Cpaapp	WT_Sample5	178			0.4658		0.5407
ABalaaappll	WT_Sample5	179			0.5035
ABalaaapplr	WT_Sample5	179			0.5035					1
ABalapapppa	WT_Sample5	179			0.476
ABalapapppp	WT_Sample5	179			0.476
ABarpaappa	WT_Sample5	179			0.6211		0.9074
ABarpaappp	WT_Sample5	179			0.6211
ABarpappaa	WT_Sample5	179			0.624
ABarpappap	WT_Sample5	179			0.624		0.5679
ABarpppppp	WT_Sample5	179			0.5528
ABplaaappa	WT_Sample5	179			0.6039		0.4941
ABplaaappp	WT_Sample5	179			0.6039		0.4968
ABplaapaaaa	WT_Sample5	179			0.5433
ABprpaapppa	WT_Sample5	179			0.5396
ABprpaapppp	WT_Sample5	179			0.5396
Cpaaaa	WT_Sample5	179			0.4868
Cpaaap	WT_Sample5	179			0.4868
Cpaapa	WT_Sample5	179			0.5876		0.6001
Cpaapp	WT_Sample5	179			0.5876
MSpppaaa	WT_Sample5	179			0.5341					1
ABalaaaalal	WT_Sample5	180			0.4675
ABalaaaalar	WT_Sample5	180			0.4675					1
[truncated: 2,103 more rows]

## Sheet: WT_Sample6
Cell identity c	Embryo sample j	Time point T	Segmentation failure (1) or not (empty)	Quality failure (value) or not (empty)						Manually annotated apoptotic cell (1) or not (empty)
[truncated: 3,730 more rows]

[truncated: 6 more sheets: WT_Sample7, WT_Sample8, MT_lag-1_Sample1, MT_lag-1_Sample2, MT_pop-1_Sample1, MT_pop-1_Sample2]
