# Supplementary material for: Cell lineage-resolved embryonic morphological map reveals novel signaling regulating cell fate and size asymmetry
Source: Research Square preprint supplement (doi:10.21203/rs.3.rs-4664717/v1), 2024-08-30
Supplement: Supplementary file 25 [file Table S8.xlsx]

## Sheet: Cell identity
Cell identity	Cell lineage	Cell fate	Data-point loss rate	Embryo sample
			Total'	WT_Sample1	WT_Sample2	WT_Sample3	WT_Sample4	WT_Sample5	WT_Sample6	WT_Sample7	WT_Sample8
ABalapppapaa'	AB'	Neuron'	1.0000±0.0000'	1.0000'	NaN'	NaN'	NaN'	NaN'	NaN'	NaN'	NaN'
ABprpaappppa'	AB'	Neuron'	1.0000±0.0000'	1.0000'	NaN'	NaN'	NaN'	NaN'	NaN'	NaN'	NaN'
Caaaaa'	C'	Skin'	0.6967±0.4266'	1.0000'	1.0000'	1.0000'	1.0000'	0.1282'	0.3671'	0.0787'	1.0000'
ABarapppapp'	AB'	Neuron'	0.6343±0.4023'	0.2051'	1.0000'	0.4839'	1.0000'	0.2188'	0.1667'	1.0000'	1.0000'
Cpaapp'	C'	Skin'	0.6256±0.4058'	0.3566'	1.0000'	1.0000'	1.0000'	0.2000'	0.3133'	0.1348'	1.0000'
Cpaaap'	C'	Skin'	0.6252±0.4132'	0.4531'	1.0000'	1.0000'	1.0000'	0.2208'	0.2469'	0.0805'	1.0000'
Cpaapa'	C'	Skin'	0.6219±0.4112'	0.3488'	1.0000'	1.0000'	1.0000'	0.2000'	0.3253'	0.1011'	1.0000'
Caaaap'	C'	Skin'	0.6096±0.4290'	0.2520'	1.0000'	1.0000'	1.0000'	0.1282'	0.4177'	0.0787'	1.0000'
Dappap'	D'	Muscle'	0.5890±0.4912'	0.0227'	0.3333'	NaN'	1.0000'	NaN'	NaN'	NaN'	1.0000'
Caaapa'	C'	Skin'	0.5786±0.4559'	0.1085'	1.0000'	1.0000'	1.0000'	0.1605'	0.3049'	0.0549'	1.0000'
ABplaaapap'	AB'	Skin'	0.5626±0.3694'	1.0000'	0.4416'	0.2535'	1.0000'	0.1831'	1.0000'	0.3333'	0.2895'
Caappd'	C'	Skin'	0.5543±0.3744'	1.0000'	0.3243'	0.1389'	1.0000'	0.3288'	1.0000'	0.3289'	0.3134'
Cpaaaa'	C'	Skin'	0.5422±0.3984'	0.4141'	1.0000'	1.0000'	1.0000'	0.2208'	0.1975'	0.0575'	0.4474'
Caaapp'	C'	Skin'	0.5260±0.4123'	0.1395'	1.0000'	1.0000'	0.5000'	0.2099'	0.2927'	0.0659'	1.0000'
ABpraapaaap'	AB'	Neuron'	0.5255±0.4065'	1.0000'	0.1765'	0.1613'	1.0000'	0.4242'	0.0968'	1.0000'	0.3448'
ABplaaapaa'	AB'	Skin'	0.5250±0.2956'	1.0000'	0.3766'	0.3521'	1.0000'	0.3521'	0.3377'	0.4524'	0.3289'
ABalapaaaaa'	AB'	Neuron'	0.5061±0.4674'	0.1207'	1.0000'	0.2222'	0.0000'	1.0000'	0.2000'	1.0000'	NaN'
Caaaa'	C'	Skin'	0.5000±0.5345'	0.0000'	1.0000'	1.0000'	1.0000'	0.0000'	0.0000'	0.0000'	1.0000'
Caappv'	C'	Neuron'	0.4912±0.3247'	1.0000'	0.3919'	0.1806'	1.0000'	0.3014'	0.2667'	0.4605'	0.3284'
ABalappapaa'	AB'	Neuron'	0.4702±0.4481'	0.2203'	1.0000'	1.0000'	0.0588'	1.0000'	0.0870'	0.3333'	0.0625'
ABarapppapa'	AB'	Neuron'	0.4560±0.3671'	0.1154'	1.0000'	0.4839'	0.4419'	0.1875'	0.0667'	0.3529'	1.0000'
ABprpppaapp'	AB'	Neuron'	0.4558±0.3611'	0.3684'	0.0256'	0.1613'	1.0000'	0.4516'	0.2759'	0.3636'	1.0000'
MSaaaaaal'	MS'	Others'	0.4444±0.5092'	0.3333'	NaN'	NaN'	0.0000'	NaN'	1.0000'	NaN'	NaN'
Dppa'	D'	Muscle'	0.4240±0.3793'	1.0000'	0.0000'	0.3095'	0.2195'	0.1000'	1.0000'	0.3684'	0.3947'
ABprpappaap'	AB'	Neuron'	0.4234±0.3870'	0.0476'	1.0000'	0.2927'	1.0000'	0.0000'	0.2927'	0.2667'	0.4878'
MSaaaaaar'	MS'	Others'	0.4167±0.5204'	0.2500'	NaN'	NaN'	0.0000'	NaN'	1.0000'	NaN'	NaN'
ABprpappaaa'	AB'	Neuron'	0.4120±0.3829'	0.0833'	0.2609'	1.0000'	0.4167'	0.0556'	0.1463'	0.3333'	1.0000'
Ealaav'	E'	Intestine'	0.4038±0.1360'	0.3077'	NaN'	NaN'	NaN'	NaN'	0.5000'	NaN'	NaN'
ABalpaaappp'	AB'	Pharynx'	0.4036±0.2617'	0.4028'	0.2353'	0.3077'	1.0000'	0.4400'	0.4000'	0.3182'	0.1250'
ABpraapaaaa'	AB'	Skin'	0.4013±0.3802'	0.3750'	0.1176'	0.0968'	1.0000'	0.1515'	0.1935'	1.0000'	0.2759'
ABarpappaa'	AB'	Skin'	0.3946±0.2641'	1.0000'	0.2603'	0.3889'	0.3708'	0.3750'	0.3919'	0.2716'	0.0986'
ABalaaappll'	AB'	Neuron'	0.3845±0.3911'	0.2162'	0.1071'	0.2917'	1.0000'	0.1852'	0.0000'	0.2759'	1.0000'
ABarpappap'	AB'	Skin'	0.3774±0.2810'	0.3719'	0.3151'	0.3194'	0.4157'	0.3611'	1.0000'	0.2222'	0.0141'
ABalapappaaa'	AB'	Neuron'	0.3750±0.0000'	0.3750'	NaN'	NaN'	NaN'	NaN'	NaN'	NaN'	NaN'
ABalpapppaa'	AB'	Pharynx'	0.3739±0.4028'	1.0000'	0.2903'	0.0000'	1.0000'	0.2917'	0.2273'	0.0000'	0.1818'
ABalpppaapd'	AB'	Neuron'	0.3733±0.4225'	0.3067'	0.0000'	0.0000'	1.0000'	1.0000'	0.0435'	0.1364'	0.5000'
ABplpppaapp'	AB'	Neuron'	0.3725±0.2673'	0.3247'	0.2353'	0.3438'	0.2955'	1.0000'	0.2188'	0.4194'	0.1429'
Cpapap'	C'	Skin'	0.3628±0.2656'	1.0000'	0.2625'	0.2703'	0.4111'	0.2568'	0.1842'	0.2262'	0.2917'
ABalaapappp'	AB'	Neuron'	0.3622±0.4327'	0.4675'	1.0000'	0.0000'	0.3714'	0.0000'	0.0000'	0.0588'	1.0000'
Cpaap'	C'	Skin'	0.3571±0.4391'	0.0000'	0.3929'	0.4643'	1.0000'	0.0000'	0.0000'	0.0000'	1.0000'
ABplpappaaa'	AB'	Neuron'	0.3343±0.3037'	1.0000'	0.4151'	0.0816'	0.3175'	0.0667'	0.0980'	0.3036'	0.3922'
Dappaa'	D'	Muscle'	0.3333±0.4714'	0.0000'	0.0000'	NaN'	1.0000'	NaN'	NaN'	NaN'	0.3333'
MSaappppp'	MS'	Muscle'	0.3333±0.0000'	0.3333'	NaN'	NaN'	NaN'	NaN'	NaN'	NaN'	NaN'
Dappp'	D'	Muscle'	0.3318±0.4294'	0.0000'	1.0000'	0.3261'	0.2462'	0.0000'	0.0625'	0.0196'	1.0000'
ABarappapaa'	AB'	Neuron'	0.3295±0.4281'	0.0125'	1.0000'	1.0000'	0.3617'	0.0541'	0.0263'	0.0732'	0.1081'
ABplaaappa'	AB'	Skin'	0.3282±0.2938'	1.0000'	0.0864'	0.2877'	0.3656'	0.3421'	0.2927'	0.1882'	0.0633'
Ealaad'	E'	Intestine'	0.3269±0.2448'	0.1538'	NaN'	NaN'	NaN'	NaN'	0.5000'	NaN'	NaN'
ABalpapaaaa'	AB'	Neuron'	0.3227±0.4271'	0.0714'	0.2791'	1.0000'	1.0000'	0.0000'	0.0541'	0.0233'	0.1538'
MSaapapaa'	MS'	Pharynx'	0.3186±0.4684'	1.0000'	0.1333'	0.0000'	0.0968'	0.0000'	0.0000'	NaN'	1.0000'
ABarpapppp'	AB'	Skin'	0.3118±0.2946'	1.0000'	0.4103'	0.2267'	0.2391'	0.2208'	0.1067'	0.2000'	0.0909'
ABalaaaparr'	AB'	Neuron'	0.3117±0.4283'	0.0933'	0.1923'	0.0909'	1.0000'	0.0000'	0.0455'	0.0714'	1.0000'
ABplaaappp'	AB'	Skin'	0.3058±0.2973'	1.0000'	0.0864'	0.1918'	0.3548'	0.3158'	0.2561'	0.1529'	0.0886'
ABplaapaaap'	AB'	Neuron'	0.3035±0.3060'	0.3421'	0.0000'	0.2609'	0.3095'	1.0000'	0.1250'	0.2941'	0.0968'
ABplpppaaap'	AB'	Neuron'	0.3013±0.3342'	0.1026'	0.1143'	0.0625'	0.4773'	0.4667'	0.1875'	1.0000'	0.0000'
Cpappv'	C'	Skin'	0.3007±0.2955'	1.0000'	0.1772'	0.2597'	0.3182'	0.0921'	0.2658'	0.2262'	0.0667'
ABprpppaaap'	AB'	Neuron'	0.2990±0.1353'	0.2727'	0.1944'	0.4333'	0.4500'	0.2188'	0.3714'	0.3889'	0.0625'
Dappa'	D'	Muscle'	0.2966±0.4421'	0.0000'	1.0000'	0.1522'	0.2203'	0.0000'	0.0000'	0.0000'	1.0000'
ABarpaapaa'	AB'	Skin'	0.2853±0.1206'	0.4692'	0.2289'	0.1923'	0.3958'	0.3000'	0.3457'	0.2644'	0.0864'
ABarpapppa'	AB'	Skin'	0.2840±0.1267'	0.5000'	0.3718'	0.2267'	0.3913'	0.2338'	0.1067'	0.2471'	0.1948'
ABprappppa'	AB'	Skin'	0.2825±0.3059'	1.0000'	0.2632'	0.1389'	0.1860'	0.0857'	0.0972'	0.1139'	0.3750'
ABarpaaapap'	AB'	Neuron'	0.2764±0.4490'	0.1111'	0.0000'	0.1000'	1.0000'	0.0000'	0.0000'	1.0000'	0.0000'
Caaap'	C'	Skin'	0.2726±0.3559'	0.0000'	0.4615'	1.0000'	0.2903'	0.0000'	0.0000'	0.0000'	0.4286'
ABarpaappa'	AB'	Skin'	0.2717±0.1802'	0.4538'	0.2381'	0.2949'	0.4842'	0.4625'	0.0988'	0.0795'	0.0617'
ABarpaappp'	AB'	Skin'	0.2707±0.1381'	0.4538'	0.2619'	0.2436'	0.4211'	0.3750'	0.2222'	0.1136'	0.0741'
Cpapaa'	C'	Skin'	0.2681±0.0855'	0.3902'	0.2250'	0.2162'	0.4111'	0.1757'	0.2368'	0.2262'	0.2639'
ABplpppapaa'	AB'	Neuron'	0.2611±0.0944'	0.2308'	0.4043'	0.2381'	0.4074'	0.2045'	0.2444'	0.2128'	0.1463'
Dapa'	D'	Muscle'	0.2594±0.0683'	0.1163'	0.3333'	0.2368'	0.2368'	0.2979'	0.2857'	0.3182'	0.2500'
ABplpaapapa'	AB'	Neuron'	0.2585±0.3210'	0.4156'	0.0857'	0.1143'	0.1628'	0.0333'	1.0000'	0.1622'	0.0938'
Cpappd'	C'	Skin'	0.2584±0.3207'	1.0000'	0.1519'	0.1169'	0.3523'	0.0658'	0.2911'	0.0357'	0.0533'
ABprpaapapa'	AB'	Neuron'	0.2561±0.3118'	0.2667'	0.0270'	0.0909'	1.0000'	0.2258'	0.2000'	0.1714'	0.0667'
ABprpaaaapa'	AB'	Others'	0.2559±0.3073'	0.1481'	0.2326'	0.2286'	1.0000'	0.0833'	0.0811'	0.1905'	0.0833'
ABpraaaaapd'	AB'	Neuron'	0.2552±0.3402'	0.4219'	0.0000'	0.0000'	1.0000'	0.3333'	0.1200'	0.1667'	0.0000'
ABprppaappa'	AB'	Neuron'	0.2491±0.3433'	0.0857'	0.0286'	0.0000'	0.0000'	1.0000'	0.3043'	0.4545'	0.1200'
Cappaap'	C'	Muscle'	0.2483±0.1360'	0.3768'	0.4516'	0.1600'	0.3871'	0.1429'	0.2174'	0.1600'	0.0909'
Dpapa'	D'	Muscle'	0.2472±0.3086'	0.0860'	0.1591'	0.1600'	0.0377'	0.1667'	1.0000'	0.1818'	0.1860'
ABprpappapp'	AB'	Neuron'	0.2441±0.3126'	0.0833'	0.2889'	1.0000'	0.1429'	0.1316'	0.0732'	0.1111'	0.1220'
ABarpaapap'	AB'	Skin'	0.2439±0.1308'	0.3538'	0.1928'	0.1538'	0.4479'	0.3250'	0.2346'	0.2184'	0.0247'
ABalpaapppa'	AB'	Skin'	0.2435±0.3161'	0.1519'	1.0000'	0.0625'	0.0980'	0.0625'	0.0857'	0.1842'	0.3030'
ABprpaapppa'	AB'	Neuron'	0.2403±0.3305'	0.4000'	0.1136'	0.0278'	0.0870'	1.0000'	0.0000'	0.1795'	0.1143'
ABprpaaaapp'	AB'	Neuron'	0.2392±0.1846'	0.2099'	0.0465'	0.1714'	0.4043'	0.4444'	0.0541'	0.5000'	0.0833'
Dppp'	D'	Muscle'	0.2355±0.1833'	0.4444'	0.5000'	0.0541'	0.1053'	0.0263'	0.3714'	0.1389'	0.2432'
ABarappappa'	AB'	Neuron'	0.2340±0.3109'	0.1600'	0.1351'	0.1515'	0.0889'	0.0909'	0.1515'	1.0000'	0.0938'
ABalapapppp'	AB'	Neuron'	0.2329±0.3374'	0.3659'	0.0270'	0.1111'	0.0816'	0.2778'	1.0000'	0.0000'	0.0000'
ABarappaapa'	AB'	Skin'	0.2325±0.3294'	0.1549'	0.3333'	1.0000'	0.1667'	0.0385'	0.0000'	0.0000'	0.1667'
ABarppaapa'	AB'	Skin'	0.2322±0.3206'	0.2358'	0.1818'	0.1528'	1.0000'	0.0667'	0.1806'	0.0000'	0.0400'
Cpaaa'	C'	Skin'	0.2309±0.3445'	0.0000'	1.0000'	0.1818'	0.3714'	0.0000'	0.0000'	0.0000'	0.2941'
ABalpapaaap'	AB'	Skin'	0.2307±0.3348'	0.0000'	0.1860'	1.0000'	0.3725'	0.0571'	0.0270'	0.0233'	0.1795'
ABprappppp'	AB'	Skin'	0.2280±0.3306'	1.0000'	0.2632'	0.0833'	0.1860'	0.0000'	0.0278'	0.0000'	0.2639'
MSaaappp'	MS'	Others'	0.2262±0.3296'	0.0495'	0.0847'	0.3051'	0.0154'	0.0690'	0.2462'	1.0000'	0.0400'
ABarappappp'	AB'	Neuron'	0.2205±0.3223'	0.2400'	0.0541'	0.1212'	0.0444'	0.1212'	0.1515'	1.0000'	0.0313'
ABplpappppa'	AB'	Neuron'	0.2178±0.3428'	0.0263'	0.0000'	0.0286'	1.0000'	0.3824'	0.0000'	0.0909'	0.2143'
ABplappppp'	AB'	Skin'	0.2141±0.3259'	1.0000'	0.0641'	0.0571'	0.1889'	0.0000'	0.1333'	0.2152'	0.0541'
Cppppaa'	C'	Muscle'	0.2136±0.3457'	0.3881'	0.2105'	1.0000'	0.0714'	0.0000'	0.0385'	0.0000'	0.0000'
ABprpppaaaa'	AB'	Others'	0.2129±0.1154'	0.1299'	0.1667'	0.3000'	0.3750'	0.2813'	0.2286'	0.2222'	0.0000'
Dapp'	D'	Muscle'	0.2129±0.1409'	0.0000'	0.2093'	0.1714'	0.1667'	0.3333'	0.2105'	0.4762'	0.1358'
ABalpapappp'	AB'	Neuron'	0.2110±0.3253'	0.1646'	0.1538'	0.0370'	0.0426'	0.1935'	0.0667'	1.0000'	0.0294'
ABplaapaaaa'	AB'	Skin'	0.2104±0.1651'	0.3947'	0.0278'	0.2174'	0.2381'	0.5000'	0.0938'	0.1471'	0.0645'
Ealpp'	E'	Intestine'	0.2079±0.3347'	0.0776'	1.0000'	0.1646'	0.0000'	0.0247'	0.0000'	0.2927'	0.1039'
ABarapaapaa'	AB'	Pharynx'	0.2068±0.1413'	0.3889'	0.0606'	0.0435'	0.3488'	0.3333'	0.0938'	0.1250'	0.2609'
Dpppp'	D'	Muscle'	0.2065±0.3613'	0.0154'	1.0000'	0.4800'	0.0000'	0.0000'	0.0000'	0.0000'	0.1569'
ABarapaappp'	AB'	Pharynx'	0.2046±0.1276'	0.1209'	0.0980'	0.0930'	0.1607'	0.3333'	0.1250'	0.4375'	0.2683'
ABprpppapaa'	AB'	Neuron'	0.2040±0.3281'	0.1149'	0.0196'	0.0222'	1.0000'	0.0909'	0.2174'	0.1224'	0.0444'
ABpraaaapppa'	AB'	Neuron'	0.2000±0.0000'	0.2000'	NaN'	NaN'	NaN'	NaN'	NaN'	NaN'	NaN'
ABarpapaaaa'	AB'	Neuron'	0.1994±0.1797'	0.2000'	0.4483'	0.0000'	0.3824'	0.3636'	0.1481'	0.0000'	0.0526'
ABarapapaap'	AB'	Unspecified'	0.1990±0.3406'	0.0145'	0.2703'	0.0882'	1.0000'	0.0000'	0.0000'	0.0000'	0.2188'
Z3'	/'	Germ Cell'	0.1987±0.1479'	0.0710'	0.3136'	0.1818'	0.1631'	0.0750'	0.0242'	0.4524'	0.3083'
ABplpppaaaa'	AB'	Neuron'	0.1984±0.1673'	0.2051'	0.3143'	0.0313'	0.4545'	0.3667'	0.1563'	0.0588'	0.0000'
ABplaapaapa'	AB'	Neuron'	0.1944±0.1371'	0.0833'	0.0488'	0.1250'	0.3191'	0.4324'	0.2051'	0.0714'	0.2703'
ABalppapapp'	AB'	Neuron'	0.1943±0.3320'	0.1899'	0.1389'	1.0000'	0.0600'	0.0606'	0.0000'	0.0000'	0.1053'
Daaa'	D'	Muscle'	0.1931±0.3538'	0.0000'	1.0000'	0.0000'	0.0000'	0.0000'	0.1579'	0.3871'	0.0000'
Eplaa'	E'	Intestine'	0.1931±0.3396'	0.0769'	1.0000'	0.2973'	0.0581'	0.0000'	0.0137'	0.0127'	0.0857'
ABprpaaapaa'	AB'	Neuron'	0.1913±0.3291'	1.0000'	0.1071'	0.0400'	0.1111'	0.0000'	0.1111'	0.0741'	0.0870'
Epraa'	E'	Intestine'	0.1907±0.3378'	0.0360'	1.0000'	0.2027'	0.2000'	0.0000'	0.0000'	0.0000'	0.0870'
ABalpppapppa'	AB'	Neuron'	0.1905±0.0000'	0.1905'	NaN'	NaN'	NaN'	NaN'	NaN'	NaN'	NaN'
Dpaa'	D'	Muscle'	0.1905±0.2205'	0.3500'	0.5000'	0.0000'	0.0000'	0.0000'	0.2121'	0.0000'	0.4615'
ABalppaappp'	AB'	Neuron'	0.1895±0.1621'	0.2857'	0.2857'	0.0417'	0.0976'	0.5000'	0.1538'	0.1515'	0.0000'
Z2'	/'	Germ Cell'	0.1886±0.1488'	0.0769'	0.2627'	0.1983'	0.1773'	0.0583'	0.0000'	0.4683'	0.2667'
Dpppa'	D'	Muscle'	0.1875±0.3457'	0.0370'	1.0000'	0.3000'	0.0000'	0.0000'	0.0000'	0.0000'	0.1633'
Ealap'	E'	Intestine'	0.1857±0.3332'	0.1197'	1.0000'	0.1098'	0.1413'	0.0000'	0.0500'	0.0000'	0.0649'
Daap'	D'	Muscle'	0.1828±0.3431'	0.0000'	0.2500'	0.0000'	0.0000'	0.0000'	0.1622'	1.0000'	0.0500'
ABplpappaap'	AB'	Others'	0.1828±0.3353'	1.0000'	0.0566'	0.0408'	0.0000'	0.0667'	0.0000'	0.1607'	0.1373'
ABprppppapp'	AB'	Neuron'	0.1825±0.1487'	0.0000'	0.2683'	0.1860'	0.4694'	0.0882'	0.2439'	0.0465'	0.1579'
ABalpaaaaap'	AB'	Pharynx'	0.1821±0.1565'	0.1333'	0.2821'	0.1786'	0.4524'	0.3125'	0.0370'	0.0606'	0.0000'
Dpapp'	D'	Muscle'	0.1808±0.1509'	0.4731'	0.1364'	0.0000'	0.0377'	0.1667'	0.3111'	0.1818'	0.1395'
ABplaaaapa'	AB'	Skin'	0.1802±0.1023'	0.2047'	0.2025'	0.1644'	0.1170'	0.2105'	0.3875'	0.1163'	0.0390'
ABplpaaaapp'	AB'	Neuron'	0.1799±0.1266'	0.2169'	0.1364'	0.0000'	0.0612'	0.3784'	0.2821'	0.2619'	0.1026'
ABarpapapp'	AB'	Skin'	0.1797±0.1346'	0.3016'	0.0633'	0.1316'	0.4086'	0.0779'	0.2533'	0.1882'	0.0130'
ABplaaaapp'	AB'	Skin'	0.1776±0.0705'	0.1575'	0.2405'	0.1781'	0.1383'	0.2105'	0.3000'	0.1047'	0.0909'
ABplpaaaapa'	AB'	Others'	0.1771±0.1170'	0.1325'	0.1591'	0.0526'	0.0612'	0.2162'	0.3590'	0.3333'	0.1026'
ABarapappaa'	AB'	Pharynx'	0.1767±0.1431'	0.4407'	0.1667'	0.1905'	0.1429'	0.0000'	0.0000'	0.2727'	0.2000'
ABplpppaapa'	AB'	Neuron'	0.1766±0.1570'	0.0909'	0.1176'	0.0000'	0.0227'	0.3125'	0.3750'	0.3871'	0.1071'
Cpppapa'	C'	Muscle'	0.1748±0.3439'	1.0000'	0.0000'	0.0000'	0.0345'	0.1333'	0.2308'	0.0000'	0.0000'
Eprap'	E'	Intestine'	0.1737±0.3474'	0.0000'	1.0000'	0.2838'	0.0625'	0.0000'	0.0000'	0.0000'	0.0435'
ABaraaapppp'	AB'	Skin'	0.1729±0.1124'	0.0921'	0.3636'	0.1176'	0.1667'	0.2813'	0.1622'	0.0000'	0.2000'
ABarappapap'	AB'	Unspecified'	0.1729±0.1914'	0.0000'	0.5000'	0.4412'	0.0851'	0.0270'	0.1053'	0.1707'	0.0541'
Daaap'	D'	Muscle'	0.1711±0.3417'	0.1868'	1.0000'	0.1000'	0.0000'	0.0000'	0.0000'	0.0816'	0.0000'
ABprpaapppp'	AB'	Unspecified'	0.1709±0.3380'	0.0769'	0.0909'	0.0278'	0.0435'	1.0000'	0.0000'	0.1282'	0.0000'
ABplppppaaa'	AB'	Neuron'	0.1706±0.1496'	0.3038'	0.0930'	0.0000'	0.0625'	0.1818'	0.2778'	0.4167'	0.0294'
Eplap'	E'	Intestine'	0.1694±0.3408'	0.0171'	1.0000'	0.1622'	0.0000'	0.0000'	0.0000'	0.0759'	0.1000'
ABarapppaap'	AB'	Neuron'	0.1687±0.3388'	0.0897'	1.0000'	0.0000'	0.0750'	0.1111'	0.0000'	0.0000'	0.0741'
ABprppppapa'	AB'	Others'	0.1684±0.1316'	0.0119'	0.0488'	0.2326'	0.4286'	0.0882'	0.2195'	0.1860'	0.1316'
MSpaapaaa'	MS'	Pharynx'	0.1675±0.3393'	0.1148'	0.0769'	0.0000'	1.0000'	0.0000'	0.0769'	0.0000'	0.0714'
ABarpaaaapa'	AB'	Neuron'	0.1669±0.0847'	0.1449'	0.1304'	0.0556'	0.2258'	0.0714'	0.2857'	0.1579'	0.2632'
ABarapppppp'	AB'	Neuron'	0.1668±0.1301'	0.0824'	0.3721'	0.3500'	0.0980'	0.0541'	0.0769'	0.2195'	0.0811'
MSpapappa'	MS'	Pharynx'	0.1638±0.0916'	0.2237'	0.2162'	0.2368'	0.0930'	0.0588'	0.0606'	0.3000'	0.1212'
ABarpppapa'	AB'	Skin'	0.1633±0.1093'	0.2177'	0.2568'	0.3108'	0.2118'	0.0000'	0.1200'	0.0244'	0.1646'
MSpaaapap'	MS'	Pharynx'	0.1624±0.3452'	1.0000'	0.1613'	0.0000'	0.0000'	0.0000'	0.1379'	0.0000'	0.0000'
ABarpapapa'	AB'	Skin'	0.1619±0.1029'	0.2857'	0.0886'	0.1184'	0.3441'	0.1169'	0.1733'	0.1294'	0.0390'
ABarappaaaa'	AB'	Neuron'	0.1596±0.1542'	0.3562'	0.3793'	0.0370'	0.2162'	0.0000'	0.0000'	0.0741'	0.2143'
ABalpaaapaa'	AB'	Pharynx'	0.1590±0.1112'	0.2192'	0.2121'	0.0833'	0.1750'	0.0455'	0.3462'	0.1905'	0.0000'
ABarppaapp'	AB'	Neuron'	0.1587±0.1520'	0.2683'	0.1818'	0.1250'	0.4615'	0.0267'	0.1667'	0.0127'	0.0267'
ABplpappppp'	AB'	Others'	0.1572±0.3483'	0.0132'	0.0000'	0.0000'	1.0000'	0.0000'	0.0000'	0.0303'	0.2143'
ABpraappaa'	AB'	Skin'	0.1572±0.1026'	0.3440'	0.1519'	0.1316'	0.2778'	0.0405'	0.0769'	0.1034'	0.1316'
ABalaaapalr'	AB'	Neuron'	0.1551±0.1163'	0.2561'	0.1750'	0.3750'	0.0800'	0.0857'	0.0000'	0.1220'	0.1471'
ABplppppaap'	AB'	Others'	0.1546±0.1652'	0.4177'	0.0233'	0.0000'	0.0208'	0.3030'	0.2778'	0.1944'	0.0000'
ABprpappapa'	AB'	Neuron'	0.1542±0.1518'	0.0595'	0.3111'	0.4615'	0.0612'	0.1053'	0.1220'	0.0889'	0.0244'
ABalpaaaapa'	AB'	Pharynx'	0.1542±0.1517'	0.4861'	0.2286'	0.1538'	0.1053'	0.0000'	0.0769'	0.1429'	0.0400'
MSapaaaad'	MS'	Others'	0.1538±0.0000'	0.1538'	NaN'	NaN'	NaN'	NaN'	NaN'	NaN'	NaN'
MSapaaaav'	MS'	Others'	0.1538±0.0000'	0.1538'	NaN'	NaN'	NaN'	NaN'	NaN'	NaN'	NaN'
ABaraaapppa'	AB'	Skin'	0.1534±0.1299'	0.1447'	0.3939'	0.1176'	0.1190'	0.2188'	0.0000'	0.0000'	0.2333'
ABplppppapa'	AB'	Others'	0.1527±0.1464'	0.1235'	0.0000'	0.0000'	0.0612'	0.1351'	0.1714'	0.3250'	0.4054'
Capapaa'	C'	Muscle'	0.1518±0.3508'	1.0000'	0.0000'	0.0000'	0.0000'	0.0000'	0.2143'	0.0000'	0.0000'
ABalaaaalpp'	AB'	Neuron'	0.1517±0.0883'	0.1290'	0.1667'	0.2667'	0.2647'	0.1739'	0.1176'	0.0000'	0.0952'
ABprapppapp'	AB'	Neuron'	0.1509±0.3443'	0.0405'	0.0000'	0.0000'	0.0263'	0.0690'	1.0000'	0.0714'	0.0000'
Daaaa'	D'	Muscle'	0.1489±0.3467'	0.1099'	1.0000'	0.0000'	0.0000'	0.0000'	0.0000'	0.0816'	0.0000'
ABplpapappp'	AB'	Neuron'	0.1484±0.1659'	0.2750'	0.0000'	0.0556'	0.0000'	0.1765'	0.1429'	0.4857'	0.0513'
Eplpa'	E'	Intestine'	0.1478±0.3454'	0.0000'	1.0000'	0.0563'	0.0132'	0.0556'	0.0000'	0.0571'	0.0000'
ABpraaapapa'	AB'	Unspecified'	0.1477±0.3471'	0.0253'	0.0270'	0.1290'	1.0000'	0.0000'	0.0000'	0.0000'	0.0000'
ABplppppapp'	AB'	Others'	0.1473±0.1306'	0.0494'	0.0682'	0.0263'	0.0408'	0.1081'	0.2571'	0.2500'	0.3784'
ABplpapppap'	AB'	Others'	0.1469±0.1073'	0.3333'	0.0476'	0.0000'	0.0816'	0.1714'	0.1333'	0.1667'	0.2414'
Dpaaa'	D'	Muscle'	0.1469±0.3459'	0.0326'	0.0000'	0.0213'	0.0364'	0.0000'	0.0851'	0.0000'	1.0000'
ABplappppa'	AB'	Skin'	0.1469±0.1458'	0.4583'	0.0897'	0.0286'	0.1667'	0.0704'	0.1333'	0.2278'	0.0000'
MSpapappp'	MS'	Others'	0.1465±0.0944'	0.2895'	0.1351'	0.2368'	0.0465'	0.1176'	0.0303'	0.2250'	0.0909'
ABprapaaaap'	AB'	Neuron'	0.1441±0.3470'	0.0278'	0.0000'	0.0000'	0.0513'	0.0000'	0.0000'	1.0000'	0.0741'
Dpaap'	D'	Muscle'	0.1413±0.3473'	0.0435'	0.0233'	0.0213'	0.0000'	0.0208'	0.0213'	0.0000'	1.0000'
ABplpaapppa'	AB'	Neuron'	0.1392±0.1172'	0.2289'	0.1905'	0.1282'	0.0000'	0.0294'	0.2439'	0.2927'	0.0000'
MSpapaapp'	MS'	Pharynx'	0.1391±0.0434'	0.1512'	0.0667'	0.1304'	0.2037'	0.0909'	0.1667'	0.1600'	0.1429'
ABalpaapppp'	AB'	Skin'	0.1360±0.1419'	0.0886'	0.2195'	0.0625'	0.0980'	0.0313'	0.0286'	0.1053'	0.4545'
ABplppaapap'	AB'	Neuron'	0.1344±0.1674'	0.0606'	0.1429'	0.0000'	0.0286'	0.2800'	0.0833'	0.4800'	0.0000'
ABplaappaa'	AB'	Skin'	0.1342±0.1065'	0.3175'	0.0843'	0.1200'	0.2556'	0.0263'	0.0741'	0.1705'	0.0253'
ABalapaappp'	AB'	Neuron'	0.1330±0.1324'	0.1341'	0.1707'	0.0278'	0.0000'	0.4000'	0.0526'	0.2250'	0.0541'
ABarpaaaaal'	AB'	Neuron'	0.1316±0.0931'	0.2258'	0.0526'	0.1333'	0.0313'	0.0588'	0.0625'	0.2500'	0.2381'
Daapp'	D'	Muscle'	0.1314±0.1465'	0.2717'	0.3191'	0.0000'	0.0714'	0.0227'	0.0204'	0.0196'	0.3261'
ABalapappap'	AB'	Neuron'	0.1313±0.0533'	0.0899'	0.1163'	0.0909'	0.0517'	0.1364'	0.1915'	0.1957'	0.1778'
ABarpppapp'	AB'	Neuron'	0.1309±0.1036'	0.1452'	0.2297'	0.3108'	0.1412'	0.0000'	0.1067'	0.0122'	0.1013'
ABprppaapap'	AB'	Neuron'	0.1305±0.1339'	0.1912'	0.0938'	0.0385'	0.0000'	0.2222'	0.1053'	0.3929'	0.0000'
ABpraaaaaaaa'	AB'	Neuron'	0.1304±0.0000'	NaN'	NaN'	NaN'	NaN'	NaN'	NaN'	NaN'	0.1304'
ABpraaaaaa'	AB'	Neuron'	0.1302±0.3518'	0.0000'	0.0000'	0.0000'	0.0000'	0.0417'	0.0000'	0.0000'	1.0000'
ABprppaappp'	AB'	Neuron'	0.1297±0.1483'	0.2571'	0.1143'	0.0000'	0.0000'	0.1111'	0.1304'	0.4242'	0.0000'
Cpppaap'	C'	Muscle'	0.1294±0.1655'	0.3889'	0.2414'	0.3333'	0.0000'	0.0000'	0.0000'	0.0000'	0.0714'
ABarapaaapa'	AB'	Pharynx'	0.1291±0.1027'	0.2857'	0.2121'	0.0417'	0.2353'	0.1053'	0.0571'	0.0000'	0.0952'
ABalppapapa'	AB'	Neuron'	0.1287±0.1714'	0.0253'	0.3333'	0.4545'	0.0200'	0.0909'	0.0000'	0.0000'	0.1053'
ABalaapaapp'	AB'	Neuron'	0.1284±0.1109'	0.1765'	0.1034'	0.2941'	0.2581'	0.0000'	0.0526'	0.1429'	0.0000'
ABaraaappap'	AB'	Skin'	0.1281±0.1273'	0.0563'	0.3000'	0.2609'	0.1892'	0.2188'	0.0000'	0.0000'	0.0000'
Daa'	D'	Muscle'	0.1278±0.0934'	0.1818'	0.1707'	0.0313'	0.0606'	0.1017'	0.0313'	0.3077'	0.1373'
ABplppappap'	AB'	Neuron'	0.1275±0.1655'	0.0704'	NaN'	0.0000'	0.0000'	0.2917'	0.1111'	0.4194'	0.0000'
MSpappa'	MS'	Muscle'	0.1272±0.3527'	0.0000'	0.0000'	0.0000'	0.0000'	0.0172'	0.0000'	1.0000'	0.0000'
Cappaaa'	C'	Muscle'	0.1264±0.0922'	0.1739'	0.1613'	0.0400'	0.0323'	0.1429'	0.2609'	0.2000'	0.0000'
ABpraaaapa'	AB'	Neuron'	0.1250±0.3536'	0.0000'	0.0000'	0.0000'	0.0000'	0.0000'	0.0000'	0.0000'	1.0000'
MSpapp'	MS'	Muscle'	0.1250±0.3536'	0.0000'	0.0000'	0.0000'	0.0000'	0.0000'	0.0000'	1.0000'	0.0000'
MSpappp'	MS'	Muscle'	0.1250±0.3536'	0.0000'	0.0000'	0.0000'	0.0000'	0.0000'	0.0000'	1.0000'	0.0000'
ABalaaaalal'	AB'	Neuron'	0.1248±0.0803'	0.0794'	0.2222'	0.1250'	0.2400'	0.1429'	0.0588'	0.1304'	0.0000'
Earpp'	E'	Intestine'	0.1248±0.1556'	0.0000'	0.3971'	0.1733'	0.3000'	0.0000'	0.0000'	0.1282'	0.0000'
ABplaapappa'	AB'	Neuron'	0.1237±0.0699'	0.1023'	0.1333'	0.0882'	0.1373'	0.1538'	0.2500'	0.1250'	0.0000'
Dapaa'	D'	Muscle'	0.1234±0.1695'	0.0213'	0.4815'	0.0000'	0.0476'	0.0256'	0.0000'	0.2449'	0.1667'
ABalaappapa'	AB'	Neuron'	0.1232±0.1122'	0.1519'	0.0571'	0.0968'	0.3902'	0.0667'	0.0645'	0.0938'	0.0645'
ABprpaaapap'	AB'	Neuron'	0.1230±0.1297'	0.4091'	0.0714'	0.0400'	0.1944'	0.0400'	0.0370'	0.1481'	0.0435'
MSpppaap'	MS'	Others'	0.1208±0.0971'	0.2700'	0.1034'	0.1111'	0.0625'	0.2545'	0.0000'	0.0351'	0.1296'
ABplaapapap'	AB'	Neuron'	0.1183±0.0976'	0.0494'	0.0000'	0.1429'	0.3158'	0.1563'	0.1515'	0.0588'	0.0714'
ABpraaappap'	AB'	Neuron'	0.1160±0.1656'	0.0241'	0.1026'	0.0000'	0.0000'	0.1429'	0.0270'	0.5000'	0.1316'
ABplaapapaa'	AB'	Neuron'	0.1157±0.1339'	0.1235'	0.0000'	0.0476'	0.4211'	0.1250'	0.0909'	0.1176'	0.0000'
ABplppaaaaa'	AB'	Neuron'	0.1150±0.1471'	0.0741'	0.0270'	0.1389'	0.1000'	0.0303'	0.0882'	0.4615'	0.0000'
ABalapapppa'	AB'	Neuron'	0.1150±0.1203'	0.3049'	0.0811'	0.0556'	0.0612'	0.0556'	0.3077'	0.0000'	0.0541'
ABarappaap'	AB'	Unspecified'	0.1149±0.1346'	0.0377'	0.2800'	0.1957'	0.0556'	0.0000'	0.0000'	0.0172'	0.3333'
MSpapaaap'	MS'	Pharynx'	0.1141±0.0731'	0.0361'	0.0238'	0.1591'	0.1429'	0.0769'	0.1579'	0.2391'	0.0769'
ABplpaaappp'	AB'	Neuron'	0.1141±0.1086'	0.1975'	0.1500'	0.0000'	0.0612'	0.3235'	0.0750'	0.1053'	0.0000'
ABaraapappp'	AB'	Pharynx'	0.1139±0.1319'	0.2083'	0.1471'	0.0000'	0.0000'	0.2222'	0.0000'	0.0000'	0.3333'
ABpraaaapad'	AB'	Neuron'	0.1139±0.0825'	0.0533'	0.1765'	0.0000'	0.0976'	0.1786'	0.2286'	0.0625'	NaN'
ABaraappaap'	AB'	Pharynx'	0.1119±0.1690'	0.5000'	0.0278'	0.0000'	0.0000'	0.1000'	0.0909'	0.1765'	0.0000'
ABpraaapppaa'	AB'	Neuron'	0.1111±0.1925'	0.0000'	NaN'	0.3333'	0.0000'	NaN'	NaN'	NaN'	NaN'
ABarpaaaapp'	AB'	Neuron'	0.1109±0.1373'	0.0870'	0.1739'	0.0556'	0.0968'	0.0000'	0.0000'	0.4211'	0.0526'
ABprpaapaaa'	AB'	Neuron'	0.1101±0.0953'	0.1690'	0.0000'	0.1471'	0.0488'	0.0968'	0.0571'	0.0588'	0.3030'
ABaraapaapa'	AB'	Pharynx'	0.1090±0.0753'	0.2326'	0.1860'	0.0465'	0.0588'	0.0513'	0.1538'	0.1163'	0.0270'
ABplaapppa'	AB'	Skin'	0.1089±0.1161'	0.3817'	0.0952'	0.0128'	0.0421'	0.0875'	0.0964'	0.1196'	0.0357'
ABprppppaap'	AB'	Others'	0.1086±0.0826'	0.0494'	0.0732'	0.1026'	0.0217'	0.0541'	0.1429'	0.2821'	0.1429'
ABprpppaapa'	AB'	Neuron'	0.1086±0.0867'	0.1579'	0.0513'	0.0323'	0.1111'	0.0000'	0.2069'	0.2424'	0.0667'
ABplpppapap'	AB'	Skin'	0.1077±0.0946'	0.0659'	0.2128'	0.2381'	0.0370'	0.0227'	0.2000'	0.0851'	0.0000'
ABpraapppa'	AB'	Skin'	0.1075±0.1110'	0.3615'	0.1446'	0.0123'	0.0860'	0.1125'	0.0494'	0.0444'	0.0494'
ABalpapapaa'	AB'	Neuron'	0.1073±0.0985'	0.0575'	0.1915'	0.3030'	0.0755'	0.0270'	0.0789'	0.0000'	0.1250'
ABalpaaaaaa'	AB'	Pharynx'	0.1068±0.1031'	0.0533'	0.2821'	0.1429'	0.2143'	0.1250'	0.0370'	0.0000'	0.0000'
ABalppaaapp'	AB'	Neuron'	0.1066±0.1355'	0.0822'	0.0313'	0.3750'	0.2308'	0.0000'	0.0000'	0.0000'	0.1333'
ABprpapappa'	AB'	Neuron'	0.1042±0.0869'	0.1184'	0.0444'	0.0000'	0.0625'	0.0588'	0.2432'	0.2250'	0.0811'
MSappaap'	MS'	Others'	0.1027±0.1084'	0.2653'	0.0727'	0.0185'	0.0290'	0.0179'	0.0000'	0.2414'	0.1765'
ABarapapapp'	AB'	Pharynx'	0.1026±0.0926'	0.0674'	0.1136'	0.2927'	0.1569'	0.0250'	0.0488'	0.1163'	0.0000'
ABplpapppaa'	AB'	Others'	0.1022±0.0981'	0.2949'	0.0238'	0.0000'	0.0204'	0.1429'	0.1000'	0.1667'	0.0690'
ABaraaappaa'	AB'	Skin'	0.1020±0.0979'	0.0423'	0.3000'	0.0870'	0.1081'	0.1250'	0.1538'	0.0000'	0.0000'
ABplaapaaa'	AB'	Unspecified'	0.1015±0.1200'	0.0577'	0.1591'	0.1400'	0.3529'	0.0000'	0.1020'	0.0000'	0.0000'
ABplaaaaaaa'	AB'	Neuron'	0.1013±0.1042'	0.3333'	0.0625'	0.0435'	0.0000'	0.0400'	0.0769'	0.1000'	0.1538'
ABprpapaaaa'	AB'	Neuron'	0.1009±0.0639'	0.1039'	0.0833'	0.1818'	0.1250'	0.0345'	0.0000'	0.1818'	0.0968'
ABalapppppp'	AB'	Neuron'	0.1004±0.0872'	0.1395'	0.0500'	0.0789'	0.2807'	0.1111'	0.0250'	0.0000'	0.1176'
ABaraappapa'	AB'	Pharynx'	0.1000±0.0893'	0.2000'	0.0638'	0.2500'	0.0408'	0.1463'	0.0244'	0.0000'	0.0750'
ABarappaaa'	AB'	Unspecified'	0.0995±0.1071'	0.0784'	0.1250'	0.2000'	0.0943'	0.0000'	0.0000'	0.0000'	0.2979'
Dapap'	D'	Muscle'	0.0995±0.1119'	0.1596'	0.2778'	0.0000'	0.1746'	0.0000'	0.0000'	0.1837'	0.0000'
ABaraapappa'	AB'	Pharynx'	0.0992±0.1176'	0.0278'	0.1176'	0.1667'	0.0000'	0.1481'	0.0000'	0.0000'	0.3333'
ABalaapppaa'	AB'	Neuron'	0.0987±0.0834'	0.0986'	0.1304'	0.0417'	0.2432'	0.0000'	0.0000'	0.1154'	0.1600'
ABpraapppp'	AB'	Skin'	0.0984±0.1083'	0.3462'	0.1205'	0.0123'	0.0860'	0.1125'	0.0494'	0.0111'	0.0494'
ABalapaapaa'	AB'	Neuron'	0.0982±0.1404'	0.0411'	0.0769'	0.0435'	0.0571'	0.4400'	0.0833'	0.0435'	0.0000'
ABalapppapp'	AB'	Neuron'	0.0981±0.0648'	0.0778'	0.2045'	0.1429'	0.1509'	0.0500'	0.0698'	0.0889'	0.0000'
ABarapaaaap'	AB'	Pharynx'	0.0974±0.1596'	0.0260'	0.4571'	0.1290'	0.1667'	0.0000'	0.0000'	0.0000'	0.0000'
MSappaaa'	MS'	Others'	0.0964±0.1010'	0.2449'	0.1273'	0.0185'	0.1014'	0.0179'	0.0000'	0.2414'	0.0196'
Cpppaaa'	C'	Muscle'	0.0952±0.0934'	0.1667'	0.0000'	0.1852'	0.0000'	0.1739'	0.0000'	0.2000'	0.0357'
MSpapaaaa'	MS'	Pharynx'	0.0950±0.0756'	0.1807'	0.0476'	0.2045'	0.1224'	0.0513'	0.1316'	0.0217'	0.0000'
ABprpappppa'	AB'	Others'	0.0949±0.1022'	0.0769'	0.0976'	0.1026'	0.1064'	0.3243'	0.0000'	0.0513'	0.0000'
Ealpa'	E'	Intestine'	0.0945±0.1092'	0.1207'	0.3425'	0.0253'	0.1196'	0.0494'	0.0125'	0.0732'	0.0130'
MSaapappp'	MS'	Others'	0.0938±0.0708'	0.1711'	0.1579'	0.0571'	0.1351'	0.0323'	0.0000'	0.1667'	0.0303'
ABpraappap'	AB'	Skin'	0.0932±0.0858'	0.2320'	0.1266'	0.0526'	0.1889'	0.0405'	0.0000'	0.0000'	0.1053'
ABprpaaappp'	AB'	Neuron'	0.0932±0.0724'	0.1250'	0.2093'	0.0000'	0.0833'	0.0278'	0.0250'	0.1538'	0.1212'
ABaraaapapp'	AB'	Pharynx'	0.0931±0.0993'	0.2083'	0.0392'	0.1064'	0.0328'	0.2708'	0.0000'	0.0000'	0.0870'
MSaapappa'	MS'	Pharynx'	0.0926±0.0652'	0.1974'	0.1316'	0.1714'	0.0541'	0.0645'	0.0278'	0.0333'	0.0606'
Earpa'	E'	Intestine'	0.0922±0.1161'	0.0175'	0.1471'	0.0133'	0.0889'	0.0000'	0.0132'	0.3462'	0.1111'
ABarpaaaaar'	AB'	Neuron'	0.0917±0.0858'	0.1935'	0.1579'	0.0667'	0.0000'	0.0000'	0.0000'	0.1250'	0.1905'
ABplpapaaap'	AB'	Neuron'	0.0912±0.0905'	0.0526'	0.1143'	0.0345'	0.0000'	0.2857'	0.0333'	0.1379'	0.0714'
ABalaaapprr'	AB'	Neuron'	0.0912±0.1028'	0.1765'	0.0250'	0.0294'	0.0000'	0.2778'	0.0000'	0.1667'	0.0541'
Daapa'	D'	Muscle'	0.0907±0.1135'	0.2065'	0.3191'	0.0000'	0.0714'	0.0227'	0.0408'	0.0000'	0.0652'
Cpppapp'	C'	Muscle'	0.0903±0.0929'	0.2727'	0.0435'	0.0000'	0.1379'	0.0667'	0.1538'	0.0000'	0.0476'
ABprpaappaa'	AB'	Neuron'	0.0902±0.0739'	0.1250'	0.0476'	0.0000'	0.1905'	0.0882'	0.0000'	0.1842'	0.0857'
ABarppaaaa'	AB'	Neuron'	0.0897±0.1013'	0.3109'	0.0556'	0.1143'	0.1250'	0.0833'	0.0000'	0.0000'	0.0282'
ABplppapppp'	AB'	Neuron'	0.0896±0.0921'	0.0896'	0.0357'	0.0000'	0.0323'	0.1111'	0.2400'	0.2083'	0.0000'
MSaaaapaa'	MS'	Pharynx'	0.0896±0.1027'	0.0244'	0.0465'	0.2857'	0.0217'	0.0270'	0.2000'	0.0000'	0.1111'
ABplppapaap'	AB'	Neuron'	0.0893±0.1314'	0.0370'	0.0789'	0.0000'	0.0000'	0.0857'	0.1176'	0.3947'	0.0000'
ABarpppaaa'	AB'	Neuron'	0.0891±0.1194'	0.3607'	0.0000'	0.1250'	0.0244'	0.0704'	0.0000'	0.0253'	0.1067'
ABprpaaaaaa'	AB'	Neuron'	0.0886±0.0945'	0.0390'	0.1622'	0.1212'	0.0256'	0.2727'	0.0000'	0.0000'	0.0882'
ABprppappap'	AB'	Neuron'	0.0886±0.0672'	0.1343'	0.0000'	0.1429'	0.0256'	0.1429'	0.1200'	0.1429'	0.0000'
MSpaaaaaa'	MS'	Pharynx'	0.0885±0.1345'	0.3651'	0.0000'	0.0000'	0.2188'	0.0476'	0.0000'	0.0769'	0.0000'
ABalapapapp'	AB'	Neuron'	0.0882±0.0810'	0.2346'	0.1622'	0.0000'	0.0385'	0.1111'	0.0263'	0.0250'	0.1081'
MSpaaapaa'	MS'	Pharynx'	0.0880±0.1583'	0.4722'	0.0323'	0.0000'	0.0000'	0.0714'	0.0690'	0.0588'	0.0000'
MSapaapp'	MS'	Others'	0.0875±0.1073'	0.0000'	0.1525'	0.0000'	0.0000'	0.0000'	0.2500'	0.2258'	0.0714'
ABplppapppa'	AB'	Neuron'	0.0874±0.1073'	0.0448'	0.1071'	0.0000'	0.0000'	0.0556'	0.2000'	0.2917'	0.0000'
ABalppappaa'	AB'	Neuron'	0.0870±0.0650'	0.1519'	0.1429'	0.0882'	0.0196'	0.1000'	0.0000'	0.0270'	0.1667'
ABalapppppa'	AB'	Neuron'	0.0870±0.0447'	0.0814'	0.0750'	0.0263'	0.1579'	0.0833'	0.0750'	0.0500'	0.1471'
ABpraaaaaaap'	AB'	Neuron'	0.0870±0.0000'	NaN'	NaN'	NaN'	NaN'	NaN'	NaN'	NaN'	0.0870'
ABalappappp'	AB'	Neuron'	0.0862±0.0745'	0.1707'	0.1892'	0.0000'	0.0233'	0.1290'	0.0000'	0.0750'	0.1026'
ABpraapapap'	AB'	Neuron'	0.0861±0.0771'	0.1558'	0.0571'	0.0000'	0.1250'	0.1034'	0.0333'	0.0000'	0.2143'
ABalpappapa'	AB'	Pharynx'	0.0860±0.0734'	0.0208'	0.2182'	0.1250'	0.0635'	0.0213'	0.0612'	0.1569'	0.0213'
ABarpppaap'	AB'	Skin'	0.0860±0.1208'	0.3607'	0.0000'	0.1111'	0.0122'	0.0845'	0.0000'	0.0127'	0.1067'
ABplaapppp'	AB'	Skin'	0.0853±0.1271'	0.3817'	0.0119'	0.0128'	0.0105'	0.0375'	0.0964'	0.1196'	0.0119'
ABprapaapa'	AB'	Others'	0.0850±0.0947'	0.1583'	0.1154'	0.0000'	0.2759'	0.0282'	0.0000'	0.0488'	0.0533'
ABplaappap'	AB'	Skin'	0.0849±0.0826'	0.2778'	0.0723'	0.0933'	0.0444'	0.0132'	0.0494'	0.0909'	0.0380'
ABprpapappp'	AB'	Neuron'	0.0849±0.0726'	0.1447'	0.0889'	0.0000'	0.0000'	0.0294'	0.1351'	0.2000'	0.0811'
ABpraapaapa'	AB'	Neuron'	0.0843±0.0614'	0.0732'	0.0476'	0.0513'	0.2200'	0.0513'	0.1111'	0.0952'	0.0250'
ABarpppppp'	AB'	Skin'	0.0843±0.1474'	0.4000'	0.0000'	0.0286'	0.0000'	0.2174'	0.0000'	0.0000'	0.0286'
ABarppaaap'	AB'	Skin'	0.0842±0.1035'	0.2941'	0.0417'	0.1571'	0.1250'	0.0556'	0.0000'	0.0000'	0.0000'
ABplpapapaa'	AB'	Others'	0.0840±0.1127'	0.0244'	0.0227'	0.0000'	0.0000'	0.2222'	0.0303'	0.2973'	0.0750'
ABprapappppa'	AB'	Neuron'	0.0833±0.0000'	0.0833'	NaN'	NaN'	NaN'	NaN'	NaN'	NaN'	NaN'
ABalaappapp'	AB'	Neuron'	0.0831±0.1385'	0.0633'	0.0571'	0.0000'	0.4146'	0.0333'	0.0000'	0.0000'	0.0968'
ABpraapaaa'	AB'	Unspecified'	0.0831±0.1440'	0.0000'	0.4167'	0.1458'	0.0000'	0.0000'	0.0625'	0.0000'	0.0400'
ABaraappppp'	AB'	Pharynx'	0.0829±0.0672'	0.0423'	0.0938'	0.0769'	0.0513'	0.0909'	0.2308'	0.0000'	0.0769'
ABarpppppa'	AB'	Skin'	0.0811±0.1280'	0.2833'	0.0000'	0.0000'	0.0471'	0.2899'	0.0000'	0.0000'	0.0286'
Dpa'	D'	Muscle'	0.0809±0.0830'	0.0323'	0.0263'	0.1020'	0.0000'	0.1364'	0.0270'	0.2535'	0.0698'
ABarapapapa'	AB'	Skin'	0.0804±0.0656'	0.0449'	0.1364'	0.1220'	0.1961'	0.0250'	0.0488'	0.0698'	0.0000'
ABalppaapp'	AB'	Unspecified'	0.0803±0.1435'	0.1111'	0.0000'	0.4222'	0.0000'	0.0000'	0.0652'	0.0217'	0.0222'
ABprpppapap'	AB'	Skin'	0.0791±0.1113'	0.0460'	0.0392'	0.0000'	0.3276'	0.0455'	0.1522'	0.0000'	0.0222'
ABalpaappap'	AB'	Skin'	0.0791±0.1031'	0.3108'	0.0571'	0.0000'	0.1163'	0.0000'	0.0714'	0.0000'	0.0769'
Cppapaa'	C'	Muscle'	0.0791±0.1638'	0.4737'	0.0000'	0.0000'	0.0000'	0.1000'	0.0000'	0.0588'	0.0000'
MSaaapaap'	MS'	Pharynx'	0.0783±0.0490'	0.0952'	0.1277'	0.0000'	0.0179'	0.1395'	0.0667'	0.0816'	0.0976'
Dap'	D'	Muscle'	0.0779±0.0778'	0.0370'	0.1224'	0.0333'	0.0000'	0.2143'	0.0625'	0.1538'	0.0000'
ABarappapp'	AB'	Neuron'	0.0776±0.1452'	0.0800'	0.0000'	0.0698'	0.0000'	0.0000'	0.0213'	0.4286'	0.0213'
ABprppppaaa'	AB'	Neuron'	0.0772±0.1019'	0.0494'	0.0732'	0.0513'	0.0000'	0.0270'	0.3143'	0.1026'	0.0000'
ABaraappapp'	AB'	Pharynx'	0.0764±0.0670'	0.0941'	0.0000'	0.0750'	0.1224'	0.1951'	0.0244'	0.0000'	0.1000'
ABplpapapap'	AB'	Neuron'	0.0758±0.0837'	0.0488'	0.0000'	0.0000'	0.0612'	0.1944'	0.0606'	0.2162'	0.0250'
ABpraaaapav'	AB'	Neuron'	0.0755±0.1206'	0.0400'	0.0588'	0.0000'	0.0244'	0.0000'	0.3429'	0.0625'	NaN'
Caapaa'	C'	Neuron'	0.0749±0.0749'	0.0676'	0.0227'	0.2414'	0.1111'	0.0556'	0.0385'	0.0625'	0.0000'
MSaaaaapaa'	MS'	Pharynx'	0.0744±0.0362'	0.0488'	0.1000'	NaN'	NaN'	NaN'	NaN'	NaN'	NaN'
ABprppappaa'	AB'	Neuron'	0.0743±0.0619'	0.0746'	0.0000'	0.1429'	0.0513'	0.1429'	0.0400'	0.1429'	0.0000'
ABaraapaaap'	AB'	Pharynx'	0.0736±0.0766'	0.2308'	0.0526'	0.1250'	0.0889'	0.0645'	0.0000'	0.0270'	0.0000'
ABalpppapav'	AB'	Neuron'	0.0732±0.0652'	0.0238'	0.0714'	0.1250'	0.0192'	0.0000'	0.0606'	0.2000'	0.0857'
ABalpapaapa'	AB'	Skin'	0.0732±0.0792'	0.2192'	0.0571'	0.0800'	0.1522'	0.0000'	0.0000'	0.0000'	0.0769'
ABplpapappa'	AB'	Neuron'	0.0731±0.1035'	0.0375'	0.0000'	0.0000'	0.0000'	0.1471'	0.1143'	0.2857'	0.0000'
MSaapaaaa'	MS'	Pharynx'	0.0719±0.0502'	0.0843'	0.1500'	0.0476'	0.0385'	0.0500'	0.0000'	0.0698'	0.1351'
ABarapapaapa'	AB'	Pharynx'	0.0714±0.0000'	0.0714'	NaN'	NaN'	NaN'	NaN'	NaN'	NaN'	NaN'
ABplppaappa'	AB'	Neuron'	0.0707±0.1014'	0.0548'	0.0645'	0.0000'	0.0256'	0.0714'	0.0370'	0.3125'	0.0000'
ABalppppaad'	AB'	Neuron'	0.0706±0.0737'	0.1975'	0.0750'	0.0000'	0.1522'	0.0588'	0.0000'	0.0000'	0.0811'
ABprpppppap'	AB'	Others'	0.0703±0.0486'	0.1286'	0.0333'	0.0645'	0.0286'	0.0000'	0.1154'	0.0667'	0.1250'
ABaraaaapa'	AB'	Unspecified'	0.0697±0.0662'	0.1475'	0.0377'	0.0000'	0.0000'	0.1207'	0.1207'	0.0000'	0.1311'
Earap'	E'	Intestine'	0.0696±0.1124'	0.0087'	0.3333'	0.0260'	0.1111'	0.0000'	0.0000'	0.0366'	0.0411'
ABalaaaarrp'	AB'	Neuron'	0.0693±0.0728'	0.2055'	0.0667'	0.0000'	0.0750'	0.1333'	0.0741'	0.0000'	0.0000'
ABalpapaap'	AB'	Unspecified'	0.0690±0.1214'	0.0000'	0.2667'	0.0000'	0.0213'	0.0000'	0.0000'	0.0000'	0.2642'
ABaraapaapp'	AB'	Pharynx'	0.0686±0.0813'	0.0233'	0.1628'	0.0000'	0.0000'	0.0513'	0.1026'	0.2093'	0.0000'
ABaraapppap'	AB'	Pharynx'	0.0683±0.1280'	0.0957'	0.0192'	0.0000'	0.0175'	0.0000'	0.3750'	0.0392'	0.0000'
ABalappaap'	AB'	Unspecified'	0.0679±0.0888'	0.2545'	0.0392'	0.0806'	0.0000'	0.0000'	0.0345'	0.0000'	0.1346'
ABplppappaa'	AB'	Neuron'	0.0675±0.0730'	0.0845'	NaN'	0.0000'	0.0000'	0.0833'	0.1111'	0.1935'	0.0000'
ABprpapaapp'	AB'	Neuron'	0.0675±0.0821'	0.1299'	0.0811'	0.0000'	0.0000'	0.0000'	0.0625'	0.2353'	0.0313'
ABprppaaaapp'	AB'	Neuron'	0.0667±0.0000'	0.0667'	NaN'	NaN'	NaN'	NaN'	NaN'	NaN'	NaN'
ABprppapapp'	AB'	Neuron'	0.0665±0.0489'	0.0606'	0.0714'	0.0000'	0.0000'	0.0870'	0.0833'	0.1500'	0.0800'
MSpappaa'	MS'	Muscle'	0.0660±0.0803'	0.0330'	0.0000'	0.0000'	0.0000'	0.0769'	0.0435'	0.2083'	0.1667'
ABprpaappap'	AB'	Neuron'	0.0660±0.0624'	0.1250'	0.0714'	0.0000'	0.1667'	0.0000'	0.0000'	0.0789'	0.0857'
MSaapaaap'	MS'	Pharynx'	0.0658±0.0487'	0.0241'	0.1250'	0.1190'	0.0385'	0.1000'	0.0000'	0.0930'	0.0270'
ABprpapapap'	AB'	Neuron'	0.0658±0.0519'	0.1250'	0.0444'	0.0000'	0.0417'	0.1143'	0.0789'	0.1220'	0.0000'
Capppaa'	C'	Muscle'	0.0657±0.1245'	0.2131'	0.0000'	0.0000'	0.0000'	0.0000'	0.3125'	0.0000'	0.0000'
ABalaapaaar'	AB'	Neuron'	0.0652±0.1170'	0.1167'	0.0000'	0.0000'	0.0000'	0.3333'	0.0000'	0.0000'	0.0714'
ABprpapaapa'	AB'	Neuron'	0.0646±0.0480'	0.1558'	0.0541'	0.0323'	0.0930'	0.0313'	0.0000'	0.0882'	0.0625'
ABalppapppp'	AB'	Neuron'	0.0643±0.0518'	0.1250'	0.0889'	0.1316'	0.0714'	0.0244'	0.0000'	0.0732'	0.0000'
ABpraaappaa'	AB'	Neuron'	0.0635±0.1066'	0.0602'	0.0256'	0.0000'	0.0204'	0.0857'	0.0000'	0.3158'	0.0000'
ABprpapapaa'	AB'	Others'	0.0634±0.0826'	0.1000'	0.0000'	0.0000'	0.0833'	0.0000'	0.0526'	0.2439'	0.0270'
ABaraaaaaap'	AB'	Pharynx'	0.0631±0.0972'	0.0286'	0.1111'	0.0000'	0.2778'	0.0870'	0.0000'	0.0000'	0.0000'
ABalapaaaa'	AB'	Unspecified'	0.0628±0.0589'	0.0149'	0.0357'	0.0469'	0.0000'	0.1389'	0.1081'	0.1447'	0.0130'
MSaappaa'	MS'	Others'	0.0627±0.0651'	0.0842'	0.0000'	0.0217'	0.1061'	0.1304'	0.0000'	0.1591'	0.0000'
ABalpppaaap'	AB'	Neuron'	0.0626±0.0990'	0.2857'	0.0313'	0.0769'	0.0000'	0.1071'	0.0000'	0.0000'	0.0000'
ABaraappaaa'	AB'	Pharynx'	0.0625±0.0967'	0.2838'	0.0000'	0.0667'	0.0000'	0.0000'	0.0909'	0.0588'	0.0000'
ABplpapaaaa'	AB'	Neuron'	0.0618±0.0579'	0.0789'	0.1714'	0.0345'	0.0000'	0.0357'	0.0667'	0.0000'	0.1071'
MSappppa'	MS'	Muscle'	0.0616±0.0664'	0.1584'	0.0000'	0.0000'	0.0000'	0.0364'	0.1525'	0.0508'	0.0943'
Caapa'	C'	Unspecified'	0.0615±0.1085'	0.3250'	0.0000'	0.0400'	0.0632'	0.0147'	0.0247'	0.0247'	0.0000'
Earaa'	E'	Intestine'	0.0614±0.1399'	0.0000'	0.4058'	0.0000'	0.0333'	0.0000'	0.0000'	0.0244'	0.0274'
ABalpppppap'	AB'	Neuron'	0.0613±0.0543'	0.1023'	0.0426'	0.0000'	0.0370'	0.1500'	0.0476'	0.1111'	0.0000'
Ealaa'	E'	Intestine'	0.0612±0.0784'	0.0000'	0.1389'	0.1951'	0.1196'	0.0000'	0.0000'	0.0357'	0.0000'
MSaapaapp'	MS'	Pharynx'	0.0608±0.0369'	0.0909'	0.0426'	0.0667'	0.0357'	0.0476'	0.0000'	0.0870'	0.1163'
ABplpaapaaa'	AB'	Neuron'	0.0607±0.0344'	0.1039'	0.0833'	0.0000'	0.0227'	0.0625'	0.0606'	0.0882'	0.0645'
Dppppa'	D'	Muscle'	0.0606±0.0000'	0.0606'	NaN'	NaN'	NaN'	NaN'	NaN'	NaN'	NaN'
ABalappapa'	AB'	Unspecified'	0.0604±0.0645'	0.0909'	0.0984'	0.1818'	0.0137'	0.0154'	0.0000'	0.0833'	0.0000'
ABarappppaa'	AB'	Neuron'	0.0604±0.0463'	0.0625'	0.0476'	0.0000'	0.1224'	0.0541'	0.1176'	0.0789'	0.0000'
ABplpaaappa'	AB'	Unspecified'	0.0602±0.0924'	0.2099'	0.0000'	0.0000'	0.0408'	0.2059'	0.0250'	0.0000'	0.0000'
ABaraaaaapp'	AB'	Pharynx'	0.0593±0.0641'	0.1370'	0.1212'	0.0000'	0.1053'	0.0000'	0.1111'	0.0000'	0.0000'
ABprppaaaaa'	AB'	Neuron'	0.0592±0.0538'	0.1392'	0.0513'	0.0270'	0.0000'	0.0606'	0.0000'	0.1351'	0.0606'
MSpapaapa'	MS'	Unspecified'	0.0592±0.0400'	0.0361'	0.0444'	0.0000'	0.1296'	0.0682'	0.0476'	0.1000'	0.0476'
ABaraappppa'	AB'	Pharynx'	0.0592±0.0935'	0.0986'	0.0000'	0.0000'	0.0256'	0.0000'	0.2692'	0.0800'	0.0000'
ABplppaaaap'	AB'	Unspecified'	0.0591±0.1351'	0.0000'	0.0000'	0.0000'	0.0000'	0.0000'	0.0882'	0.3846'	0.0000'
ABalapaaapp'	AB'	Neuron'	0.0588±0.0605'	0.1646'	0.0857'	0.0000'	0.0435'	0.0000'	0.1143'	0.0625'	0.0000'
ABaraaapaap'	AB'	Pharynx'	0.0588±0.0697'	0.0227'	0.1860'	0.0000'	0.1296'	0.0882'	0.0000'	0.0435'	0.0000'
ABpraapapaa'	AB'	Neuron'	0.0585±0.0283'	0.0779'	0.0571'	0.0370'	0.0938'	0.0345'	0.1000'	0.0323'	0.0357'
Caapp'	C'	Unspecified'	0.0585±0.0848'	0.2162'	0.0000'	0.0000'	0.0000'	0.0000'	0.0625'	0.1622'	0.0270'
ABarpaaapaa'	AB'	Neuron'	0.0583±0.1224'	0.0794'	0.0000'	0.0000'	0.0345'	0.0000'	0.0000'	0.3529'	0.0000'
MSppaapp'	MS'	Others'	0.0564±0.0681'	0.0000'	0.0847'	0.0000'	0.0143'	0.0351'	0.1017'	0.1964'	0.0192'
Cppppap'	C'	Muscle'	0.0561±0.0734'	0.1194'	0.0000'	0.2000'	0.0000'	0.0526'	0.0769'	0.0000'	0.0000'
ABplpaapaap'	AB'	Neuron'	0.0559±0.0572'	0.0909'	0.0000'	0.0294'	0.0227'	0.1250'	0.0000'	0.1471'	0.0323'
ABprpppppaa'	AB'	Muscle'	0.0557±0.0916'	0.0000'	0.0000'	0.1290'	0.0000'	0.0000'	0.0000'	0.0667'	0.2500'
Caaa'	C'	Skin'	0.0554±0.1401'	0.0000'	0.4000'	0.0000'	0.0435'	0.0000'	0.0000'	0.0000'	0.0000'
Dpap'	D'	Muscle'	0.0553±0.0958'	0.2821'	0.0345'	0.0000'	0.0000'	0.0000'	0.0571'	0.0000'	0.0690'
ABalaaapall'	AB'	Neuron'	0.0551±0.0471'	0.0610'	0.1000'	0.0938'	0.0000'	0.0000'	0.0000'	0.0976'	0.0882'
ABarpaaapa'	AB'	Neuron'	0.0550±0.1344'	0.3860'	0.0000'	0.0000'	0.0169'	0.0000'	0.0000'	0.0000'	0.0370'
ABalappappa'	AB'	Neuron'	0.0546±0.0501'	0.0854'	0.1351'	0.0000'	0.0000'	0.0645'	0.0244'	0.0250'	0.1026'
Capppap'	C'	Muscle'	0.0546±0.1377'	0.3934'	0.0000'	0.0000'	0.0435'	0.0000'	0.0000'	0.0000'	0.0000'
ABplapaapa'	AB'	Others'	0.0543±0.0472'	0.0242'	0.0375'	0.0563'	0.0652'	0.0959'	0.0000'	0.0122'	0.1429'
ABalaapaaa'	AB'	Unspecified'	0.0543±0.0900'	0.1833'	0.0189'	0.0175'	0.0000'	0.2143'	0.0000'	0.0000'	0.0000'
MSaaapapa'	MS'	Pharynx'	0.0542±0.0563'	0.0247'	0.0213'	0.0000'	0.1569'	0.0698'	0.0476'	0.1136'	0.0000'
ABpraaaap'	AB'	Unspecified'	0.0542±0.1402'	0.0000'	0.0000'	0.0000'	0.0000'	0.0333'	0.0000'	0.0000'	0.4000'
MSpppppp'	MS'	Muscle'	0.0541±0.0475'	0.0515'	0.1250'	0.0962'	0.0154'	0.0000'	0.0000'	0.0500'	0.0943'
ABprpapaaap'	AB'	Neuron'	0.0538±0.0582'	0.0779'	0.0556'	0.0000'	0.0500'	0.0345'	0.0303'	0.1818'	0.0000'
ABplaapaapp'	AB'	Neuron'	0.0537±0.0737'	0.0000'	0.0732'	0.0625'	0.2128'	0.0811'	0.0000'	0.0000'	0.0000'
ABprapaapp'	AB'	Skin'	0.0530±0.0517'	0.0750'	0.0513'	0.0714'	0.1609'	0.0000'	0.0128'	0.0122'	0.0400'
ABprpapppaa'	AB'	Neuron'	0.0525±0.0335'	0.0132'	0.0769'	0.0571'	0.0465'	0.0606'	0.0606'	0.1053'	0.0000'
ABplppapapa'	AB'	Neuron'	0.0525±0.0547'	0.0704'	0.1429'	0.0000'	0.0000'	0.0741'	0.0800'	NaN'	0.0000'
ABalppapaap'	AB'	Neuron'	0.0522±0.0679'	0.1013'	0.0606'	0.0000'	0.1957'	0.0294'	0.0000'	0.0000'	0.0303'
ABalpppapad'	AB'	Neuron'	0.0521±0.0696'	0.1786'	0.0000'	0.1250'	0.0000'	0.0278'	0.0000'	0.0000'	0.0857'
MSaappp'	MS'	Muscle'	0.0521±0.1473'	0.0000'	0.0000'	0.0000'	0.0000'	0.0000'	0.0000'	0.4167'	0.0000'
MSppaaaa'	MS'	Others'	0.0520±0.0580'	0.0465'	0.1143'	0.0725'	0.1548'	0.0000'	0.0000'	0.0282'	0.0000'
ABplaapappp'	AB'	Unspecified'	0.0517±0.0417'	0.0154'	0.0000'	0.0882'	0.0392'	0.0769'	0.1250'	0.0417'	0.0270'
MSaaaappp'	MS'	Pharynx'	0.0510±0.0725'	0.0000'	0.0513'	0.0286'	0.0000'	0.0000'	0.1515'	0.1765'	0.0000'
ABplapaapp'	AB'	Skin'	0.0510±0.0473'	0.0484'	0.0750'	0.0000'	0.0761'	0.0411'	0.0000'	0.0244'	0.1429'
ABplpppppap'	AB'	Others'	0.0509±0.0547'	0.0563'	0.0000'	0.0800'	0.0303'	0.1538'	0.0870'	0.0000'	0.0000'
ABplppaappp'	AB'	Neuron'	0.0506±0.0369'	0.0137'	0.0645'	0.0370'	0.0513'	0.1071'	0.0370'	0.0938'	0.0000'
ABplapaaaap'	AB'	Neuron'	0.0501±0.0548'	0.0779'	0.0000'	0.0000'	0.1591'	0.0690'	0.0625'	0.0323'	0.0000'
Capappa'	C'	Muscle'	0.0500±0.1414'	0.0000'	0.0000'	0.0000'	0.0000'	0.0000'	0.0000'	0.0000'	0.4000'
ABalpaappaa'	AB'	Skin'	0.0500±0.0746'	0.2162'	0.0000'	0.0000'	0.0698'	0.0370'	0.0000'	0.0000'	0.0769'
ABplpapaapp'	AB'	Neuron'	0.0499±0.0527'	0.0390'	0.1081'	0.0000'	0.0851'	0.0333'	0.0000'	0.1333'	0.0000'
ABalpppppaa'	AB'	Neuron'	0.0497±0.0542'	0.0682'	0.0000'	0.0000'	0.1667'	0.0250'	0.0238'	0.0667'	0.0476'
ABplpaaapap'	AB'	Neuron'	0.0497±0.0629'	0.1538'	0.0357'	0.0000'	0.0000'	0.0000'	0.0833'	0.0000'	0.1250'
MSaappa'	MS'	Others'	0.0497±0.1187'	0.0588'	0.0000'	0.0000'	0.0000'	0.0000'	0.0000'	0.3390'	0.0000'
ABplppapaaa'	AB'	Neuron'	0.0496±0.1292'	0.0000'	0.0000'	0.0000'	0.0000'	0.0286'	0.0000'	0.3684'	0.0000'
ABaraaaaaa'	AB'	Pharynx'	0.0493±0.0433'	0.0000'	0.0698'	0.0625'	0.0000'	0.0800'	0.1250'	0.0370'	0.0200'
ABplpappaa'	AB'	Unspecified'	0.0490±0.1275'	0.0000'	0.0000'	0.0000'	0.0286'	0.0000'	0.0000'	0.3636'	0.0000'
ABprapapppp'	AB'	Unspecified'	0.0489±0.0955'	0.0000'	0.0313'	0.0000'	0.0000'	0.2727'	0.0000'	0.0000'	0.0870'
ABarppappa'	AB'	Skin'	0.0488±0.0737'	0.0000'	0.0000'	0.1594'	0.0455'	0.0000'	0.0141'	0.0000'	0.1714'
ABaraapapaa'	AB'	Unspecified'	0.0485±0.0590'	0.0526'	0.0588'	0.0000'	0.1695'	0.0889'	0.0000'	0.0182'	0.0000'
MSaapaapa'	MS'	Unspecified'	0.0476±0.0336'	0.0250'	0.0638'	0.0000'	0.0357'	0.0476'	0.0488'	0.0435'	0.1163'
ABarapppppa'	AB'	Unspecified'	0.0473±0.0495'	0.0000'	0.1163'	0.0500'	0.0392'	0.0000'	0.0513'	0.1220'	0.0000'
ABplpaapppp'	AB'	Unspecified'	0.0472±0.0722'	0.1772'	0.0000'	0.0000'	0.0000'	0.0294'	0.0244'	0.1463'	0.0000'
ABaraapapap'	AB'	Pharynx'	0.0470±0.0356'	0.0737'	0.0784'	0.0208'	0.0847'	0.0000'	0.0455'	0.0727'	0.0000'
ABpraaaaap'	AB'	Unspecified'	0.0468±0.0475'	0.0526'	0.0192'	0.0185'	0.0000'	0.0893'	0.0192'	0.0323'	0.1429'
MSaap'	MS'	Unspecified'	0.0467±0.1132'	0.0000'	0.0000'	0.0000'	0.0000'	0.0000'	0.0500'	0.3235'	0.0000'
ABarapaaaaa'	AB'	Pharynx'	0.0465±0.0986'	0.0390'	0.2857'	0.0000'	0.0476'	0.0000'	0.0000'	0.0000'	0.0000'
MSaappap'	MS'	Others'	0.0463±0.0445'	0.0211'	0.0000'	0.0652'	0.0455'	0.0652'	0.0370'	0.1364'	0.0000'
Capaapa'	C'	Muscle'	0.0462±0.0871'	0.2157'	0.0000'	0.0000'	0.0000'	0.0000'	0.0000'	0.0000'	0.1538'
Capaapp'	C'	Muscle'	0.0462±0.0871'	0.2157'	0.0000'	0.0000'	0.0000'	0.0000'	0.0000'	0.0000'	0.1538'
ABprpaaaaap'	AB'	Neuron'	0.0459±0.0372'	0.0649'	0.0811'	0.0000'	0.1026'	0.0303'	0.0294'	0.0000'	0.0588'
ABplaaaaappa'	AB'	Neuron'	0.0455±0.0000'	0.0455'	NaN'	NaN'	NaN'	NaN'	NaN'	NaN'	NaN'
ABaraaapaaa'	AB'	Skin'	0.0453±0.0503'	0.0114'	0.1395'	0.0250'	0.0741'	0.0882'	0.0238'	0.0000'	0.0000'
ABprppapppp'	AB'	Neuron'	0.0448±0.0656'	0.1639'	0.0833'	0.0000'	0.0000'	0.0000'	0.1111'	0.0000'	0.0000'
Eplpp'	E'	Intestine'	0.0445±0.0696'	0.0211'	0.2090'	0.0423'	0.0000'	0.0556'	0.0000'	0.0286'	0.0000'
ABalaaapal'	AB'	Neuron'	0.0444±0.1257'	0.0000'	0.0000'	0.0000'	0.0000'	0.0000'	0.0000'	0.0000'	0.3556'
MSapappp'	MS'	Muscle'	0.0441±0.1008'	0.0463'	0.0000'	0.0000'	0.0000'	0.0000'	0.2903'	0.0000'	0.0161'
ABalaaaarlp'	AB'	Neuron'	0.0439±0.0677'	0.1806'	0.0323'	0.0000'	0.0227'	0.1154'	0.0000'	0.0000'	0.0000'
ABaraaaaapa'	AB'	Pharynx'	0.0438±0.0457'	0.1233'	0.0606'	0.0000'	0.0000'	0.0000'	0.0370'	0.0385'	0.0909'
ABalpppaaaa'	AB'	Neuron'	0.0438±0.0573'	0.0909'	0.1563'	0.0385'	0.0000'	0.0000'	0.0000'	0.0645'	0.0000'
ABplpapaapa'	AB'	Neuron'	0.0434±0.0315'	0.0390'	0.0541'	0.0000'	0.0851'	0.0333'	0.0690'	0.0667'	0.0000'
ABarappapa'	AB'	Unspecified'	0.0428±0.0863'	0.0444'	0.0000'	0.0476'	0.0000'	0.0000'	0.0000'	0.2500'	0.0000'
ABplaapapa'	AB'	Neuron'	0.0426±0.0871'	0.0213'	0.0435'	0.0000'	0.2545'	0.0000'	0.0213'	0.0000'	0.0000'
ABplpaaapaa'	AB'	Neuron'	0.0420±0.0600'	0.1538'	0.0000'	0.1154'	0.0250'	0.0000'	0.0417'	0.0000'	0.0000'
ABalppapaaa'	AB'	Neuron'	0.0417±0.0573'	0.1392'	0.1212'	0.0000'	0.0435'	0.0294'	0.0000'	0.0000'	0.0000'
ABpraaaaaaa'	AB'	Neuron'	0.0416±0.0606'	0.0423'	0.0000'	0.0769'	0.0000'	0.1739'	0.0000'	0.0400'	0.0000'
ABaraaaapap'	AB'	Pharynx'	0.0412±0.1008'	0.2881'	0.0417'	0.0000'	0.0000'	0.0000'	0.0000'	0.0000'	0.0000'
ABprppapapa'	AB'	Neuron'	0.0405±0.0527'	0.0152'	0.0357'	0.0000'	0.0000'	0.0000'	0.0833'	0.1500'	0.0400'
ABplppppppp'	AB'	Skin'	0.0404±0.0568'	0.0263'	0.0000'	0.0000'	0.0000'	0.0556'	0.1579'	0.0833'	0.0000'
Eprpa'	E'	Intestine'	0.0404±0.0786'	0.0000'	0.2188'	0.0909'	0.0133'	0.0000'	0.0000'	0.0000'	0.0000'
ABarappppap'	AB'	Neuron'	0.0403±0.0357'	0.0625'	0.0714'	0.0000'	0.1020'	0.0270'	0.0000'	0.0263'	0.0333'
ABalppaaapa'	AB'	Neuron'	0.0402±0.0498'	0.0000'	0.0000'	0.1250'	0.0513'	0.0000'	0.0455'	0.0000'	0.1000'
ABplpaappaa'	AB'	Neuron'	0.0401±0.0623'	0.0127'	0.0250'	0.0000'	0.1800'	0.0789'	0.0000'	0.0244'	0.0000'
MSpaaaapp'	MS'	Pharynx'	0.0397±0.0656'	0.1932'	0.0652'	0.0000'	0.0179'	0.0217'	0.0000'	0.0192'	0.0000'
ABalpappaap'	AB'	Unspecified'	0.0396±0.0647'	0.0469'	0.0952'	0.0000'	0.0000'	0.1750'	0.0000'	0.0000'	0.0000'
MSpapapaa'	MS'	Pharynx'	0.0395±0.0765'	0.1163'	0.2000'	0.0000'	0.0000'	0.0000'	0.0000'	0.0000'	0.0000'
Cppapap'	C'	Muscle'	0.0395±0.1116'	0.3158'	0.0000'	0.0000'	0.0000'	0.0000'	0.0000'	0.0000'	0.0000'
ABalaaaarr'	AB'	Unspecified'	0.0392±0.0442'	0.0000'	0.0222'	0.0000'	0.0192'	0.0652'	0.0204'	0.0545'	0.1321'
ABarpapaappa'	AB'	Neuron'	0.0385±0.0000'	0.0385'	NaN'	NaN'	NaN'	NaN'	NaN'	NaN'	NaN'
Caap'	C'	Unspecified'	0.0380±0.0942'	0.0000'	0.2692'	0.0000'	0.0000'	0.0345'	0.0000'	0.0000'	0.0000'
ABalpapapap'	AB'	Unspecified'	0.0378±0.0498'	0.0263'	0.1277'	0.0000'	0.0943'	0.0541'	0.0000'	0.0000'	0.0000'
MSapaaaa'	MS'	Others'	0.0378±0.0503'	0.1250'	0.0145'	0.0000'	0.0000'	0.0000'	0.0857'	0.0000'	0.0769'
MSpapppp'	MS'	Muscle'	0.0376±0.0600'	0.0000'	0.0000'	0.1346'	0.0000'	0.0351'	0.0000'	0.1311'	0.0000'
MSappppp'	MS'	Muscle'	0.0375±0.0319'	0.0891'	0.0172'	0.0000'	0.0000'	0.0545'	0.0339'	0.0678'	0.0377'
MSaaaap'	MS'	Unspecified'	0.0375±0.1061'	0.0000'	0.0000'	0.0000'	0.0000'	0.0000'	0.3000'	0.0000'	0.0000'
ABalppppapa'	AB'	Unspecified'	0.0374±0.0414'	0.0375'	0.1190'	0.0000'	0.0600'	0.0588'	0.0000'	0.0238'	0.0000'
ABalappppap'	AB'	Neuron'	0.0373±0.0334'	0.0978'	0.0217'	0.0217'	0.0000'	0.0476'	0.0000'	0.0638'	0.0455'
ABplpppppp'	AB'	Unspecified'	0.0372±0.0777'	0.0000'	0.0000'	0.0000'	0.0000'	0.0488'	0.0000'	0.2245'	0.0244'
ABplpaaaaaa'	AB'	Neuron'	0.0369±0.0409'	0.0250'	0.0750'	0.1111'	0.0000'	0.0000'	0.0270'	0.0000'	0.0571'
ABalpappppa'	AB'	Pharynx'	0.0367±0.0642'	0.0300'	0.1897'	0.0000'	0.0000'	0.0000'	0.0000'	0.0351'	0.0392'
MSpapa'	MS'	Unspecified'	0.0365±0.1031'	0.0000'	0.0000'	0.0000'	0.0000'	0.0000'	0.0000'	0.2917'	0.0000'
ABplpppppa'	AB'	Others'	0.0362±0.0735'	0.0000'	0.0000'	0.0000'	0.0000'	0.0392'	0.0000'	0.2131'	0.0370'
ABalapappaa'	AB'	Unspecified'	0.0358±0.0443'	0.0247'	0.0000'	0.0000'	0.0000'	0.0682'	0.1277'	0.0217'	0.0444'
ABaraaaaaaa'	AB'	Pharynx'	0.0357±0.0569'	0.0286'	0.1667'	0.0000'	0.0556'	0.0000'	0.0345'	0.0000'	0.0000'
ABalpaapapa'	AB'	Pharynx'	0.0356±0.0411'	0.0196'	0.0000'	0.0000'	0.0972'	0.0566'	0.0926'	0.0000'	0.0189'
ABalpaapaap'	AB'	Pharynx'	0.0354±0.0674'	0.0116'	0.0000'	0.0488'	0.1964'	0.0000'	0.0000'	0.0000'	0.0263'
ABpraaaappp'	AB'	Unspecified'	0.0348±0.0467'	0.0152'	0.0000'	0.1111'	0.0000'	0.0909'	0.0000'	0.0263'	NaN'
ABpraaaaaap'	AB'	Neuron'	0.0344±0.0385'	0.0704'	0.0000'	0.0000'	0.0811'	0.0435'	0.0000'	0.0800'	0.0000'
ABprppapaap'	AB'	Neuron'	0.0342±0.0473'	0.1013'	0.0000'	0.0000'	0.0000'	0.1143'	0.0000'	0.0270'	0.0313'
Capaaap'	C'	Muscle'	0.0339±0.0636'	0.0000'	0.0000'	0.0000'	0.0000'	0.0000'	0.1538'	0.0000'	0.1176'
ABalaaapar'	AB'	Unspecified'	0.0337±0.0877'	0.0192'	0.0000'	0.0000'	0.0000'	0.0000'	0.0000'	0.0000'	0.2500'
ABprapppaaa'	AB'	Neuron'	0.0336±0.0622'	0.1356'	0.0000'	0.0000'	0.0000'	0.0000'	0.0000'	0.0000'	0.1333'
ABarapapppa'	AB'	Pharynx'	0.0331±0.0263'	0.0408'	0.0364'	0.0566'	0.0758'	0.0000'	0.0192'	0.0357'	0.0000'
ABprpaaappa'	AB'	Unspecified'	0.0328±0.0723'	0.0250'	0.2093'	0.0000'	0.0000'	0.0278'	0.0000'	0.0000'	0.0000'
ABprapaaapp'	AB'	Neuron'	0.0326±0.0640'	0.0127'	0.0000'	0.1875'	0.0000'	0.0000'	0.0000'	0.0286'	0.0323'
ABplppapap'	AB'	Neuron'	0.0325±0.0528'	0.0769'	0.0000'	0.0000'	0.0000'	0.0000'	0.0000'	0.1429'	0.0400'
ABplappp'	AB'	Unspecified'	0.0324±0.0778'	0.0000'	0.0000'	0.0000'	0.2222'	0.0000'	0.0000'	0.0370'	0.0000'
MSappapp'	MS'	Muscle'	0.0322±0.0692'	0.0000'	0.0377'	0.0000'	0.0000'	0.0000'	0.0200'	0.2000'	0.0000'
MSaaaaapp'	MS'	Pharynx'	0.0322±0.0297'	0.0879'	0.0196'	0.0213'	0.0175'	0.0233'	0.0000'	0.0196'	0.0682'
ABprpapppap'	AB'	Neuron'	0.0320±0.0375'	0.0132'	0.0000'	0.0000'	0.0465'	0.0606'	0.0303'	0.1053'	0.0000'
ABprppapppa'	AB'	Neuron'	0.0318±0.0747'	0.2131'	0.0417'	0.0000'	0.0000'	0.0000'	0.0000'	0.0000'	0.0000'
MSaapp'	MS'	Unspecified'	0.0313±0.0884'	0.0000'	0.0000'	0.0000'	0.0000'	0.0000'	0.0000'	0.2500'	0.0000'
MSapappa'	MS'	Muscle'	0.0310±0.0559'	0.0556'	0.0000'	0.0000'	0.0000'	0.0000'	0.1613'	0.0147'	0.0161'
MSapppap'	MS'	Muscle'	0.0310±0.0386'	0.0784'	0.0169'	0.0000'	0.1014'	0.0185'	0.0000'	0.0323'	0.0000'
Cpaa'	C'	Skin'	0.0309±0.0604'	0.0000'	0.1600'	0.0870'	0.0000'	0.0000'	0.0000'	0.0000'	0.0000'
ABalpaapaaa'	AB'	Skin'	0.0307±0.0329'	0.0116'	0.0000'	0.0000'	0.0893'	0.0500'	0.0000'	0.0417'	0.0526'
ABalapaappa'	AB'	Unspecified'	0.0306±0.0369'	0.0610'	0.0732'	0.0000'	0.0000'	0.0857'	0.0000'	0.0250'	0.0000'
ABarppappp'	AB'	Skin'	0.0306±0.0548'	0.0000'	0.0000'	0.0000'	0.0455'	0.0000'	0.0423'	0.0000'	0.1571'
ABarapaappa'	AB'	Pharynx'	0.0301±0.0317'	0.0330'	0.0784'	0.0000'	0.0357'	0.0000'	0.0000'	0.0208'	0.0732'
Capaap'	C'	Muscle'	0.0299±0.0410'	0.0000'	0.0377'	0.0545'	0.0303'	0.0000'	0.0000'	0.1167'	0.0000'
ABalppappap'	AB'	Neuron'	0.0299±0.0445'	0.0127'	0.0000'	0.0882'	0.0000'	0.0000'	0.0000'	0.0270'	0.1111'
MSaaaa'	MS'	Unspecified'	0.0298±0.0842'	0.0000'	0.0000'	0.0000'	0.0000'	0.2381'	0.0000'	0.0000'	0.0000'
Dpp'	D'	Muscle'	0.0292±0.0477'	0.0345'	0.0702'	0.0000'	0.0000'	0.0000'	0.0000'	0.1290'	0.0000'
ABpraapaapp'	AB'	Neuron'	0.0290±0.0325'	0.0488'	0.0476'	0.0000'	0.0800'	0.0000'	0.0556'	0.0000'	0.0000'
ABarapppaaa'	AB'	Neuron'	0.0289±0.0721'	0.0256'	0.0000'	0.2059'	0.0000'	0.0000'	0.0000'	0.0000'	0.0000'
ABalpapaaa'	AB'	Unspecified'	0.0287±0.0347'	0.0000'	0.0541'	0.0769'	0.0238'	0.0000'	0.0000'	0.0000'	0.0750'
ABalaaapprl'	AB'	Neuron'	0.0287±0.0384'	0.0941'	0.0250'	0.0294'	0.0000'	0.0000'	0.0000'	0.0000'	0.0811'
MSapapaa'	MS'	Others'	0.0284±0.0237'	0.0702'	0.0290'	0.0000'	0.0380'	0.0149'	0.0294'	0.0000'	0.0455'
ABaraaapapa'	AB'	Pharynx'	0.0282±0.0356'	0.0521'	0.0980'	0.0426'	0.0328'	0.0000'	0.0000'	0.0000'	0.0000'
ABarpapaaa'	AB'	Unspecified'	0.0279±0.0413'	0.0179'	0.1176'	0.0000'	0.0526'	0.0000'	0.0000'	0.0000'	0.0351'
ABalaaaarl'	AB'	Unspecified'	0.0279±0.0489'	0.0000'	0.0000'	0.0426'	0.0000'	0.0200'	0.0000'	0.0175'	0.1429'
ABalppapppa'	AB'	Unspecified'	0.0278±0.0307'	0.0227'	0.0889'	0.0263'	0.0357'	0.0488'	0.0000'	0.0000'	0.0000'
Dppap'	D'	Muscle'	0.0276±0.0312'	0.0753'	0.0600'	0.0444'	0.0000'	0.0408'	0.0000'	0.0000'	0.0000'
ABarapppaa'	AB'	Neuron'	0.0273±0.0610'	0.0000'	0.0000'	0.0233'	0.0000'	0.0000'	0.0000'	0.0189'	0.1765'
MSaaapapp'	MS'	Pharynx'	0.0271±0.0543'	0.0123'	0.0213'	0.0000'	0.0000'	0.0000'	0.0238'	0.1591'	0.0000'
ABprpaapaap'	AB'	Neuron'	0.0267±0.0428'	0.0423'	0.0541'	0.1176'	0.0000'	0.0000'	0.0000'	0.0000'	0.0000'
ABarppppaa'	AB'	Skin'	0.0265±0.0313'	0.0496'	0.0822'	0.0000'	0.0118'	0.0000'	0.0143'	0.0000'	0.0541'
ABalapppaap'	AB'	Neuron'	0.0265±0.0421'	0.0952'	0.0000'	0.0000'	0.0909'	0.0000'	0.0000'	0.0256'	0.0000'
ABalppaaap'	AB'	Neuron'	0.0264±0.0428'	0.0000'	0.0465'	0.0000'	0.0000'	0.0455'	0.0000'	0.0000'	0.1190'
MSpappppa'	MS'	Muscle'	0.0263±0.0000'	0.0263'	NaN'	NaN'	NaN'	NaN'	NaN'	NaN'	NaN'
ABplpappp'	AB'	Unspecified'	0.0263±0.0636'	0.0000'	0.0000'	0.0000'	0.0000'	0.0000'	0.0286'	0.1818'	0.0000'
ABalpappapp'	AB'	Pharynx'	0.0260±0.0409'	0.0313'	0.0727'	0.1042'	0.0000'	0.0000'	0.0000'	0.0000'	0.0000'
ABarppapaa'	AB'	Skin'	0.0259±0.0448'	0.0168'	0.0000'	0.0725'	0.1176'	0.0000'	0.0000'	0.0000'	0.0000'
MSaaapaaa'	MS'	Pharynx'	0.0258±0.0523'	0.1429'	0.0638'	0.0000'	0.0000'	0.0000'	0.0000'	0.0000'	0.0000'
ABalaapapp'	AB'	Unspecified'	0.0256±0.0636'	0.0000'	0.0233'	0.0000'	0.0000'	0.0000'	0.0000'	0.0000'	0.1818'
ABalpappppp'	AB'	Pharynx'	0.0256±0.0468'	0.0000'	0.1379'	0.0000'	0.0294'	0.0000'	0.0000'	0.0175'	0.0196'
ABplaapaap'	AB'	Neuron'	0.0251±0.0541'	0.0000'	0.0000'	0.0488'	0.1522'	0.0000'	0.0000'	0.0000'	0.0000'
ABplppap'	AB'	Neuron'	0.0250±0.0707'	0.0000'	0.0000'	0.0000'	0.2000'	0.0000'	0.0000'	0.0000'	0.0000'
Cpppppd'	C'	Muscle'	0.0250±0.0707'	0.2000'	0.0000'	0.0000'	0.0000'	0.0000'	0.0000'	0.0000'	0.0000'
ABarapapppp'	AB'	Pharynx'	0.0248±0.0311'	0.0714'	0.0182'	0.0755'	0.0152'	0.0000'	0.0000'	0.0179'	0.0000'
ABalpppappp'	AB'	Unspecified'	0.0247±0.0266'	0.0000'	0.0455'	0.0513'	0.0000'	0.0000'	0.0000'	0.0455'	0.0556'
ABalaappppp'	AB'	Neuron'	0.0245±0.0237'	0.0244'	0.0488'	0.0526'	0.0189'	0.0000'	0.0000'	0.0000'	0.0513'
MSaaaaapap'	MS'	Pharynx'	0.0244±0.0345'	0.0488'	0.0000'	NaN'	NaN'	NaN'	NaN'	NaN'	NaN'
ABalaapa'	AB'	Unspecified'	0.0235±0.0540'	0.0000'	0.0000'	0.0000'	0.0000'	0.1538'	0.0345'	0.0000'	0.0000'
ABalapaaapa'	AB'	Neuron'	0.0235±0.0466'	0.0633'	0.0000'	0.0000'	0.0000'	0.0000'	0.0000'	0.1250'	0.0000'
ABarpaaa'	AB'	Unspecified'	0.0235±0.0406'	0.0000'	0.1154'	0.0000'	0.0370'	0.0000'	0.0000'	0.0000'	0.0357'
MSppppaa'	MS'	Muscle'	0.0234±0.0445'	0.0000'	0.0000'	0.0000'	0.0423'	0.0000'	0.0182'	0.1270'	0.0000'
ABprpappp'	AB'	Unspecified'	0.0233±0.0547'	0.0000'	0.0000'	0.0000'	0.0000'	0.0000'	0.0000'	0.1563'	0.0303'
ABplpapppa'	AB'	Others'	0.0233±0.0414'	0.0000'	0.0000'	0.0250'	0.0000'	0.0000'	0.0435'	0.1176'	0.0000'
ABplpapppp'	AB'	Unspecified'	0.0231±0.0274'	0.0000'	0.0000'	0.0000'	0.0435'	0.0000'	0.0217'	0.0556'	0.0638'
ABplapaaapp'	AB'	Neuron'	0.0230±0.0330'	0.0602'	0.0789'	0.0000'	0.0444'	0.0000'	0.0000'	0.0000'	0.0000'
ABplappapp'	AB'	Skin'	0.0229±0.0288'	0.0079'	0.0000'	0.0548'	0.0323'	0.0000'	0.0125'	0.0000'	0.0759'
Capaaaa'	C'	Muscle'	0.0228±0.0428'	0.0000'	0.0000'	0.0000'	0.1053'	0.0769'	0.0000'	0.0000'	0.0000'
ABprapappa'	AB'	Skin'	0.0228±0.0547'	0.1575'	0.0000'	0.0000'	0.0000'	0.0000'	0.0123'	0.0000'	0.0123'
ABplpapp'	AB'	Unspecified'	0.0227±0.0643'	0.0000'	0.0000'	0.0000'	0.1818'	0.0000'	0.0000'	0.0000'	0.0000'
ABprpappppp'	AB'	Others'	0.0226±0.0280'	0.0641'	0.0000'	0.0000'	0.0638'	0.0270'	0.0000'	0.0256'	0.0000'
MSaaap'	MS'	Unspecified'	0.0225±0.0485'	0.0000'	0.0000'	0.0000'	0.0000'	0.1364'	0.0435'	0.0000'	0.0000'
ABplpaaaaap'	AB'	Neuron'	0.0221±0.0385'	0.0125'	0.0000'	0.0000'	0.0000'	0.0645'	0.0000'	0.1000'	0.0000'
ABalpppaap'	AB'	Unspecified'	0.0220±0.0271'	0.0000'	0.0000'	0.0000'	0.0556'	0.0000'	0.0377'	0.0645'	0.0185'
ABarpaaaaa'	AB'	Neuron'	0.0219±0.0485'	0.0167'	0.1404'	0.0179'	0.0000'	0.0000'	0.0000'	0.0000'	0.0000'
ABalpppa'	AB'	Unspecified'	0.0218±0.0404'	0.0000'	0.0000'	0.0000'	0.0000'	0.0909'	0.0833'	0.0000'	0.0000'
ABalaapp'	AB'	Unspecified'	0.0217±0.0615'	0.0000'	0.0000'	0.0000'	0.0000'	0.1739'	0.0000'	0.0000'	0.0000'
Dppaa'	D'	Muscle'	0.0215±0.0382'	0.1075'	0.0000'	0.0444'	0.0000'	0.0000'	0.0000'	0.0000'	0.0200'
Capapap'	C'	Muscle'	0.0212±0.0600'	0.1698'	0.0000'	0.0000'	0.0000'	0.0000'	0.0000'	0.0000'	0.0000'
ABplapppaaa'	AB'	Neuron'	0.0212±0.0396'	0.0952'	0.0741'	0.0000'	0.0000'	0.0000'	0.0000'	0.0000'	0.0000'
MSpppapp'	MS'	Muscle'	0.0211±0.0272'	0.0435'	0.0000'	0.0000'	0.0313'	0.0196'	0.0000'	0.0741'	0.0000'
ABarapapaa'	AB'	Unspecified'	0.0210±0.0510'	0.0000'	0.0222'	0.0000'	0.1458'	0.0000'	0.0000'	0.0000'	0.0000'
Eprpp'	E'	Intestine'	0.0209±0.0432'	0.0000'	0.1250'	0.0152'	0.0267'	0.0000'	0.0000'	0.0000'	0.0000'
ABarppppap'	AB'	Skin'	0.0208±0.0357'	0.0165'	0.0959'	0.0000'	0.0000'	0.0000'	0.0000'	0.0000'	0.0541'
ABarapppap'	AB'	Neuron'	0.0207±0.0368'	0.0000'	0.0000'	0.0217'	0.0000'	0.0000'	0.0000'	0.0400'	0.1042'
ABalpaapapp'	AB'	Pharynx'	0.0207±0.0265'	0.0000'	0.0714'	0.0000'	0.0417'	0.0189'	0.0000'	0.0339'	0.0000'
ABarpaaaa'	AB'	Neuron'	0.0202±0.0383'	0.0000'	0.0968'	0.0000'	0.0000'	0.0000'	0.0645'	0.0000'	0.0000'
ABalaappppa'	AB'	Unspecified'	0.0199±0.0312'	0.0000'	0.0000'	0.0526'	0.0000'	0.0811'	0.0000'	0.0000'	0.0256'
ABplppapapp'	AB'	Neuron'	0.0198±0.0378'	0.0986'	0.0000'	0.0000'	0.0000'	0.0000'	0.0400'	NaN'	0.0000'
Cappapp'	C'	Muscle'	0.0194±0.0359'	0.0781'	0.0000'	0.0000'	0.0769'	0.0000'	0.0000'	0.0000'	0.0000'
MSpappap'	MS'	Muscle'	0.0194±0.0239'	0.0000'	0.0000'	0.0233'	0.0000'	0.0256'	0.0435'	0.0625'	0.0000'
ABarppap'	AB'	Skin'	0.0192±0.0544'	0.0000'	0.0000'	0.0000'	0.1538'	0.0000'	0.0000'	0.0000'	0.0000'
ABplappapa'	AB'	Skin'	0.0192±0.0330'	0.0000'	0.0000'	0.0548'	0.0860'	0.0000'	0.0000'	0.0000'	0.0127'
ABplpppppaa'	AB'	Others'	0.0190±0.0298'	0.0282'	0.0000'	0.0800'	0.0000'	0.0000'	0.0435'	0.0000'	0.0000'
MSappap'	MS'	Unspecified'	0.0186±0.0289'	0.0213'	0.0000'	0.0000'	0.0000'	0.0000'	0.0000'	0.0638'	0.0638'
MSapa'	MS'	Unspecified'	0.0185±0.0369'	0.0000'	0.0000'	0.0000'	0.0000'	0.1000'	0.0476'	0.0000'	0.0000'
ABpraapappa'	AB'	Neuron'	0.0184±0.0178'	0.0238'	0.0227'	0.0263'	0.0000'	0.0513'	0.0000'	0.0227'	0.0000'
ABplaaaaaa'	AB'	Unspecified'	0.0182±0.0208'	0.0000'	0.0000'	0.0612'	0.0156'	0.0192'	0.0185'	0.0313'	0.0000'
ABpraaapaad'	AB'	Neuron'	0.0182±0.0205'	0.0278'	0.0323'	0.0000'	0.0500'	0.0000'	0.0000'	0.0357'	0.0000'
ABprppaaaap'	AB'	Unspecified'	0.0181±0.0350'	0.0000'	0.0000'	0.0541'	0.0000'	0.0909'	0.0000'	0.0000'	0.0000'
ABalppppppa'	AB'	Unspecified'	0.0181±0.0288'	0.0000'	0.0000'	0.0000'	0.0606'	0.0667'	0.0000'	0.0175'	0.0000'
ABaraapppaa'	AB'	Unspecified'	0.0181±0.0254'	0.0000'	0.0577'	0.0000'	0.0000'	0.0455'	0.0417'	0.0000'	0.0000'
MSpapapa'	MS'	Unspecified'	0.0180±0.0228'	0.0274'	0.0000'	0.0152'	0.0000'	0.0000'	0.0000'	0.0435'	0.0580'
ABaraappaa'	AB'	Pharynx'	0.0179±0.0304'	0.0000'	0.0417'	0.0833'	0.0000'	0.0000'	0.0000'	0.0182'	0.0000'
ABalpapp'	AB'	Unspecified'	0.0179±0.0505'	0.0000'	0.0000'	0.0000'	0.0000'	0.1429'	0.0000'	0.0000'	0.0000'
ABalpappp'	AB'	Unspecified'	0.0179±0.0505'	0.0000'	0.0000'	0.0000'	0.0000'	0.0000'	0.0000'	0.1429'	0.0000'
MSapp'	MS'	Unspecified'	0.0179±0.0505'	0.0000'	0.0000'	0.0000'	0.0000'	0.0000'	0.0000'	0.1429'	0.0000'
MSppppap'	MS'	Muscle'	0.0175±0.0188'	0.0101'	0.0517'	0.0000'	0.0282'	0.0000'	0.0000'	0.0317'	0.0182'
MSaapppp'	MS'	Muscle'	0.0175±0.0318'	0.0000'	0.0000'	0.0000'	0.0299'	0.0189'	0.0000'	0.0909'	0.0000'
ABalpppaaa'	AB'	Neuron'	0.0171±0.0193'	0.0204'	0.0000'	0.0000'	0.0364'	0.0000'	0.0392'	0.0000'	0.0408'
ABalappp'	AB'	Unspecified'	0.0170±0.0482'	0.0000'	0.0000'	0.0000'	0.0000'	0.1364'	0.0000'	0.0000'	0.0000'
ABalpppapa'	AB'	Neuron'	0.0167±0.0471'	0.0000'	0.0000'	0.0000'	0.0000'	0.0000'	0.0000'	0.0000'	0.1333'
Capaa'	C'	Muscle'	0.0164±0.0465'	0.0000'	0.0000'	0.0000'	0.0000'	0.0000'	0.0000'	0.1316'	0.0000'
MSpppppa'	MS'	Muscle'	0.0164±0.0220'	0.0412'	0.0000'	0.0000'	0.0154'	0.0000'	0.0577'	0.0167'	0.0000'
ABalaapaap'	AB'	Unspecified'	0.0163±0.0184'	0.0192'	0.0000'	0.0192'	0.0000'	0.0196'	0.0556'	0.0169'	0.0000'
ABarapaapa'	AB'	Unspecified'	0.0162±0.0229'	0.0000'	0.0000'	0.0370'	0.0000'	0.0000'	0.0392'	0.0000'	0.0536'
MSapaaap'	MS'	Muscle'	0.0162±0.0164'	0.0439'	0.0290'	0.0147'	0.0000'	0.0000'	0.0286'	0.0135'	0.0000'
ABprppappp'	AB'	Neuron'	0.0162±0.0233'	0.0000'	0.0000'	0.0000'	0.0370'	0.0577'	0.0345'	0.0000'	0.0000'
ABalaapppa'	AB'	Unspecified'	0.0160±0.0276'	0.0000'	0.0000'	0.0000'	0.0345'	0.0769'	0.0000'	0.0169'	0.0000'
ABarappppa'	AB'	Neuron'	0.0159±0.0190'	0.0000'	0.0000'	0.0000'	0.0435'	0.0000'	0.0213'	0.0426'	0.0200'
MSppapaa'	MS'	Others'	0.0158±0.0233'	0.0000'	0.0143'	0.0000'	0.0000'	0.0149'	0.0000'	0.0667'	0.0308'
MSaaaaaa'	MS'	Others'	0.0158±0.0333'	0.0930'	0.0000'	0.0000'	0.0333'	0.0000'	0.0000'	0.0000'	0.0000'
ABplpaappap'	AB'	Neuron'	0.0157±0.0352'	0.0253'	0.1000'	0.0000'	0.0000'	0.0000'	0.0000'	0.0000'	0.0000'
ABplaapa'	AB'	Unspecified'	0.0156±0.0442'	0.0000'	0.0000'	0.0000'	0.0000'	0.1250'	0.0000'	0.0000'	0.0000'
ABplaappp'	AB'	Skin'	0.0156±0.0442'	0.0000'	0.0000'	0.0000'	0.1250'	0.0000'	0.0000'	0.0000'	0.0000'
MSppappa'	MS'	Muscle'	0.0154±0.0231'	0.0093'	0.0000'	0.0333'	0.0000'	0.0161'	0.0645'	0.0000'	0.0000'
ABaraaapaa'	AB'	Unspecified'	0.0150±0.0335'	0.0000'	0.0952'	0.0244'	0.0000'	0.0000'	0.0000'	0.0000'	0.0000'
ABprpapppp'	AB'	Others'	0.0148±0.0222'	0.0000'	0.0500'	0.0000'	0.0000'	0.0476'	0.0000'	0.0208'	0.0000'
Cpppppv'	C'	Muscle'	0.0147±0.0416'	0.0000'	0.0000'	0.0000'	0.0000'	0.0000'	0.1176'	0.0000'	0.0000'
ABalapppaaa'	AB'	Neuron'	0.0146±0.0279'	0.0714'	0.0000'	0.0000'	0.0455'	0.0000'	0.0000'	0.0000'	0.0000'
Cappapa'	C'	Muscle'	0.0146±0.0290'	0.0781'	0.0000'	0.0000'	0.0385'	0.0000'	0.0000'	0.0000'	0.0000'
MSapppaa'	MS'	Muscle'	0.0145±0.0310'	0.0294'	0.0000'	0.0000'	0.0870'	0.0000'	0.0000'	0.0000'	0.0000'
MSpaaappp'	MS'	Pharynx'	0.0145±0.0214'	0.0460'	0.0227'	0.0000'	0.0000'	0.0000'	0.0476'	0.0000'	0.0000'
ABplppaa'	AB'	Unspecified'	0.0144±0.0408'	0.0000'	0.0000'	0.0000'	0.1154'	0.0000'	0.0000'	0.0000'	0.0000'
ABarppapap'	AB'	Skin'	0.0143±0.0274'	0.0000'	0.0000'	0.0435'	0.0706'	0.0000'	0.0000'	0.0000'	0.0000'
ABprpaappp'	AB'	Unspecified'	0.0142±0.0402'	0.0000'	0.0000'	0.0000'	0.0000'	0.1136'	0.0000'	0.0000'	0.0000'
Cpapa'	C'	Skin'	0.0141±0.0262'	0.0000'	0.0000'	0.0588'	0.0541'	0.0000'	0.0000'	0.0000'	0.0000'
MSpap'	MS'	Unspecified'	0.0139±0.0393'	0.0000'	0.0000'	0.0000'	0.0000'	0.0000'	0.0000'	0.1111'	0.0000'
ABprpappaa'	AB'	Neuron'	0.0138±0.0302'	0.0000'	0.0000'	0.0256'	0.0851'	0.0000'	0.0000'	0.0000'	0.0000'
ABalpapapp'	AB'	Unspecified'	0.0137±0.0266'	0.0400'	0.0698'	0.0000'	0.0000'	0.0000'	0.0000'	0.0000'	0.0000'
ABpraaapppa'	AB'	Unspecified'	0.0134±0.0262'	0.0000'	0.0385'	0.0000'	0.0000'	0.0000'	0.0000'	0.0690'	0.0000'
ABarapaaaa'	AB'	Pharynx'	0.0133±0.0196'	0.0213'	0.0455'	0.0000'	0.0000'	0.0000'	0.0000'	0.0000'	0.0400'
ABalapp'	AB'	Unspecified'	0.0132±0.0244'	0.0000'	0.0000'	0.0000'	0.0526'	0.0000'	0.0000'	0.0526'	0.0000'
ABarpap'	AB'	Unspecified'	0.0132±0.0372'	0.0000'	0.0000'	0.0000'	0.1053'	0.0000'	0.0000'	0.0000'	0.0000'
Capaaa'	C'	Muscle'	0.0129±0.0196'	0.0000'	0.0000'	0.0455'	0.0172'	0.0000'	0.0000'	0.0408'	0.0000'
MSaaaapap'	MS'	Pharynx'	0.0128±0.0138'	0.0244'	0.0233'	0.0000'	0.0000'	0.0270'	0.0000'	0.0000'	0.0278'
ABaraapaaaa'	AB'	Pharynx'	0.0124±0.0272'	0.0769'	0.0000'	0.0000'	0.0222'	0.0000'	0.0000'	0.0000'	0.0000'
ABplpaaaap'	AB'	Unspecified'	0.0123±0.0266'	0.0000'	0.0000'	0.0000'	0.0000'	0.0000'	0.0233'	0.0000'	0.0750'
ABpraapappp'	AB'	Unspecified'	0.0123±0.0228'	0.0000'	0.0455'	0.0526'	0.0000'	0.0000'	0.0000'	0.0000'	0.0000'
ABprappaap'	AB'	Skin'	0.0121±0.0184'	0.0488'	0.0256'	0.0000'	0.0227'	0.0000'	0.0000'	0.0000'	0.0000'
MSpaaaapa'	MS'	Pharynx'	0.0121±0.0137'	0.0341'	0.0217'	0.0000'	0.0000'	0.0217'	0.0000'	0.0192'	0.0000'
Caa'	C'	Unspecified'	0.0119±0.0337'	0.0000'	0.0952'	0.0000'	0.0000'	0.0000'	0.0000'	0.0000'	0.0000'
Cppaaaa'	C'	Muscle'	0.0119±0.0337'	0.0952'	0.0000'	0.0000'	0.0000'	0.0000'	0.0000'	0.0000'	0.0000'
ABalpaap'	AB'	Unspecified'	0.0114±0.0321'	0.0000'	0.0000'	0.0000'	0.0000'	0.0909'	0.0000'	0.0000'	0.0000'
ABplaaaap'	AB'	Skin'	0.0114±0.0321'	0.0000'	0.0000'	0.0000'	0.0000'	0.0000'	0.0909'	0.0000'	0.0000'
ABplppappp'	AB'	Neuron'	0.0113±0.0212'	0.0000'	0.0000'	0.0000'	0.0000'	0.0000'	0.0385'	0.0517'	0.0000'
ABprpaaaaa'	AB'	Neuron'	0.0112±0.0171'	0.0000'	0.0227'	0.0000'	0.0000'	0.0000'	0.0213'	0.0000'	0.0455'
ABplpaaapa'	AB'	Neuron'	0.0112±0.0316'	0.0000'	0.0000'	0.0000'	0.0893'	0.0000'	0.0000'	0.0000'	0.0000'
MSpaapapa'	MS'	Pharynx'	0.0109±0.0309'	0.0875'	0.0000'	0.0000'	0.0000'	0.0000'	0.0000'	0.0000'	0.0000'
ABaraapapp'	AB'	Pharynx'	0.0108±0.0160'	0.0172'	0.0000'	0.0000'	0.0377'	0.0000'	0.0000'	0.0317'	0.0000'
ABprppappa'	AB'	Neuron'	0.0108±0.0236'	0.0000'	0.0000'	0.0000'	0.0196'	0.0667'	0.0000'	0.0000'	0.0000'
ABaraaaaap'	AB'	Pharynx'	0.0106±0.0162'	0.0000'	0.0435'	0.0213'	0.0000'	0.0000'	0.0000'	0.0000'	0.0200'
Cpapp'	C'	Skin'	0.0104±0.0200'	0.0000'	0.0000'	0.0323'	0.0513'	0.0000'	0.0000'	0.0000'	0.0000'
ABalppapaa'	AB'	Neuron'	0.0104±0.0159'	0.0000'	0.0208'	0.0000'	0.0200'	0.0000'	0.0000'	0.0000'	0.0426'
ABplaaap'	AB'	Skin'	0.0104±0.0295'	0.0000'	0.0000'	0.0000'	0.0000'	0.0833'	0.0000'	0.0000'	0.0000'
MSapaa'	MS'	Unspecified'	0.0104±0.0295'	0.0000'	0.0000'	0.0000'	0.0000'	0.0833'	0.0000'	0.0000'	0.0000'
ABarapaaap'	AB'	Unspecified'	0.0101±0.0187'	0.0370'	0.0435'	0.0000'	0.0000'	0.0000'	0.0000'	0.0000'	0.0000'
ABprpppaaa'	AB'	Unspecified'	0.0099±0.0207'	0.0213'	0.0000'	0.0000'	0.0577'	0.0000'	0.0000'	0.0000'	0.0000'
ABprppppppp'	AB'	Skin'	0.0098±0.0192'	0.0513'	0.0000'	0.0000'	0.0000'	0.0000'	0.0270'	0.0000'	0.0000'
ABarpaaaap'	AB'	Neuron'	0.0093±0.0173'	0.0000'	0.0000'	0.0377'	0.0000'	0.0370'	0.0000'	0.0000'	0.0000'
MSppappp'	MS'	Muscle'	0.0093±0.0170'	0.0093'	0.0000'	0.0167'	0.0000'	0.0000'	0.0484'	0.0000'	0.0000'
ABarapappa'	AB'	Unspecified'	0.0093±0.0140'	0.0000'	0.0000'	0.0328'	0.0128'	0.0000'	0.0000'	0.0000'	0.0286'
MSppapap'	MS'	Muscle'	0.0092±0.0174'	0.0442'	0.0000'	0.0000'	0.0000'	0.0000'	0.0290'	0.0000'	0.0000'
Cppaaap'	C'	Muscle'	0.0089±0.0253'	0.0000'	0.0000'	0.0000'	0.0000'	0.0000'	0.0000'	0.0000'	0.0714'
MSaapapa'	MS'	Unspecified'	0.0089±0.0131'	0.0000'	0.0000'	0.0000'	0.0000'	0.0286'	0.0139'	0.0000'	0.0286'
ABalappppaa'	AB'	Unspecified'	0.0089±0.0176'	0.0233'	0.0000'	0.0000'	0.0000'	0.0476'	0.0000'	0.0000'	0.0000'
ABplapappa'	AB'	Skin'	0.0088±0.0103'	0.0227'	0.0000'	0.0000'	0.0000'	0.0125'	0.0235'	0.0114'	0.0000'
ABplppapaa'	AB'	Neuron'	0.0087±0.0247'	0.0000'	0.0000'	0.0000'	0.0000'	0.0000'	0.0000'	0.0000'	0.0698'
MSapppp'	MS'	Muscle'	0.0087±0.0247'	0.0000'	0.0000'	0.0000'	0.0698'	0.0000'	0.0000'	0.0000'	0.0000'
ABalpapppa'	AB'	Unspecified'	0.0086±0.0160'	0.0000'	0.0357'	0.0000'	0.0000'	0.0333'	0.0000'	0.0000'	0.0000'
MSpaaaaa'	MS'	Unspecified'	0.0086±0.0133'	0.0167'	0.0357'	0.0000'	0.0164'	0.0000'	0.0000'	0.0000'	0.0000'
ABalpaaaaa'	AB'	Pharynx'	0.0086±0.0174'	0.0000'	0.0000'	0.0476'	0.0208'	0.0000'	0.0000'	0.0000'	0.0000'
ABalpppapp'	AB'	Unspecified'	0.0085±0.0241'	0.0000'	0.0000'	0.0000'	0.0000'	0.0000'	0.0000'	0.0000'	0.0682'
ABprappapa'	AB'	Skin'	0.0085±0.0184'	0.0161'	0.0519'	0.0000'	0.0000'	0.0000'	0.0000'	0.0000'	0.0000'
ABplappaap'	AB'	Skin'	0.0085±0.0128'	0.0320'	0.0000'	0.0000'	0.0000'	0.0000'	0.0000'	0.0233'	0.0128'
ABalppapap'	AB'	Neuron'	0.0085±0.0117'	0.0000'	0.0222'	0.0000'	0.0217'	0.0000'	0.0000'	0.0000'	0.0238'
ABalaaaala'	AB'	Unspecified'	0.0085±0.0127'	0.0000'	0.0000'	0.0185'	0.0000'	0.0000'	0.0333'	0.0000'	0.0159'
ABplapapap'	AB'	Skin'	0.0084±0.0163'	0.0078'	0.0000'	0.0000'	0.0000'	0.0000'	0.0000'	0.0471'	0.0125'
ABalpaapp'	AB'	Skin'	0.0083±0.0236'	0.0000'	0.0000'	0.0000'	0.0000'	0.0667'	0.0000'	0.0000'	0.0000'
ABarapapa'	AB'	Unspecified'	0.0083±0.0236'	0.0000'	0.0667'	0.0000'	0.0000'	0.0000'	0.0000'	0.0000'	0.0000'
ABarpaapa'	AB'	Skin'	0.0082±0.0152'	0.0000'	0.0000'	0.0000'	0.0323'	0.0000'	0.0333'	0.0000'	0.0000'
ABalaappap'	AB'	Neuron'	0.0082±0.0113'	0.0222'	0.0000'	0.0000'	0.0208'	0.0000'	0.0000'	0.0000'	0.0222'
ABplppppaa'	AB'	Unspecified'	0.0082±0.0231'	0.0000'	0.0000'	0.0000'	0.0000'	0.0000'	0.0000'	0.0652'	0.0000'
ABprpppppp'	AB'	Unspecified'	0.0082±0.0231'	0.0652'	0.0000'	0.0000'	0.0000'	0.0000'	0.0000'	0.0000'	0.0000'
ABalpppppppa'	AB'	Neuron'	0.0081±0.0214'	0.0566'	0.0000'	0.0000'	0.0000'	NaN'	0.0000'	0.0000'	0.0000'
ABplpappa'	AB'	Unspecified'	0.0081±0.0228'	0.0000'	0.0000'	0.0000'	0.0000'	0.0000'	0.0000'	0.0645'	0.0000'
ABprapppap'	AB'	Unspecified'	0.0079±0.0153'	0.0000'	0.0233'	0.0000'	0.0000'	0.0000'	0.0000'	0.0400'	0.0000'
ABplpppap'	AB'	Unspecified'	0.0078±0.0145'	0.0000'	0.0000'	0.0000'	0.0000'	0.0000'	0.0000'	0.0323'	0.0303'
ABplpppaa'	AB'	Neuron'	0.0078±0.0221'	0.0000'	0.0000'	0.0000'	0.0000'	0.0000'	0.0000'	0.0000'	0.0625'
ABplppppp'	AB'	Unspecified'	0.0078±0.0221'	0.0000'	0.0000'	0.0000'	0.0000'	0.0000'	0.0000'	0.0625'	0.0000'
ABprppapaaa'	AB'	Neuron'	0.0078±0.0221'	0.0000'	0.0000'	0.0000'	0.0000'	0.0000'	0.0000'	0.0000'	0.0625'
MSapapa'	MS'	Unspecified'	0.0078±0.0221'	0.0000'	0.0000'	0.0000'	0.0000'	0.0000'	0.0625'	0.0000'	0.0000'
ABprappaaa'	AB'	Skin'	0.0078±0.0112'	0.0000'	0.0256'	0.0000'	0.0227'	0.0000'	0.0137'	0.0000'	0.0000'
ABalpaaaap'	AB'	Unspecified'	0.0077±0.0150'	0.0392'	0.0000'	0.0227'	0.0000'	0.0000'	0.0000'	0.0000'	0.0000'
Dp'	D'	Muscle'	0.0077±0.0143'	0.0323'	0.0000'	0.0000'	0.0000'	0.0000'	0.0000'	0.0294'	0.0000'
MSppaaap'	MS'	Muscle'	0.0077±0.0120'	0.0088'	0.0000'	0.0290'	0.0238'	0.0000'	0.0000'	0.0000'	0.0000'
ABpraapapa'	AB'	Neuron'	0.0077±0.0150'	0.0400'	0.0213'	0.0000'	0.0000'	0.0000'	0.0000'	0.0000'	0.0000'
ABalpppaa'	AB'	Unspecified'	0.0076±0.0214'	0.0000'	0.0000'	0.0000'	0.0000'	0.0606'	0.0000'	0.0000'	0.0000'
ABarapaaa'	AB'	Unspecified'	0.0076±0.0214'	0.0000'	0.0000'	0.0000'	0.0000'	0.0000'	0.0000'	0.0000'	0.0606'
ABplppapp'	AB'	Neuron'	0.0076±0.0214'	0.0000'	0.0000'	0.0000'	0.0000'	0.0000'	0.0000'	0.0000'	0.0606'
ABprappapp'	AB'	Skin'	0.0075±0.0108'	0.0242'	0.0130'	0.0000'	0.0227'	0.0000'	0.0000'	0.0000'	0.0000'
ABarpppap'	AB'	Unspecified'	0.0075±0.0139'	0.0000'	0.0313'	0.0000'	0.0286'	0.0000'	0.0000'	0.0000'	0.0000'
ABprapapap'	AB'	Skin'	0.0074±0.0164'	0.0465'	0.0000'	0.0000'	0.0000'	0.0000'	0.0127'	0.0000'	0.0000'
ABarapaapp'	AB'	Pharynx'	0.0074±0.0208'	0.0000'	0.0000'	0.0588'	0.0000'	0.0000'	0.0000'	0.0000'	0.0000'
ABarppa'	AB'	Unspecified'	0.0074±0.0208'	0.0000'	0.0000'	0.0000'	0.0588'	0.0000'	0.0000'	0.0000'	0.0000'
ABplapappp'	AB'	Unspecified'	0.0074±0.0208'	0.0000'	0.0000'	0.0000'	0.0000'	0.0000'	0.0588'	0.0000'	0.0000'
ABplapppa'	AB'	Unspecified'	0.0074±0.0208'	0.0000'	0.0000'	0.0000'	0.0588'	0.0000'	0.0000'	0.0000'	0.0000'
ABplpppaap'	AB'	Neuron'	0.0073±0.0141'	0.0000'	0.0000'	0.0000'	0.0000'	0.0000'	0.0213'	0.0370'	0.0000'
ABalppppppp'	AB'	Neuron'	0.0072±0.0204'	0.0000'	0.0000'	0.0000'	0.0000'	0.0577'	0.0000'	0.0000'	0.0000'
ABalapppapa'	AB'	Unspecified'	0.0072±0.0160'	0.0118'	0.0455'	0.0000'	0.0000'	0.0000'	0.0000'	0.0000'	0.0000'
ABalapaaa'	AB'	Unspecified'	0.0071±0.0202'	0.0571'	0.0000'	0.0000'	0.0000'	0.0000'	0.0000'	0.0000'	0.0000'
ABaraaappa'	AB'	Skin'	0.0071±0.0200'	0.0000'	0.0000'	0.0566'	0.0000'	0.0000'	0.0000'	0.0000'	0.0000'
ABalapaap'	AB'	Unspecified'	0.0069±0.0196'	0.0556'	0.0000'	0.0000'	0.0000'	0.0000'	0.0000'	0.0000'	0.0000'
ABplaaapa'	AB'	Skin'	0.0069±0.0196'	0.0000'	0.0000'	0.0000'	0.0000'	0.0556'	0.0000'	0.0000'	0.0000'
ABplapppapp'	AB'	Neuron'	0.0069±0.0196'	0.0000'	0.0000'	0.0000'	0.0000'	0.0000'	0.0000'	0.0556'	0.0000'
Cppappp'	C'	Muscle'	0.0069±0.0196'	0.0556'	0.0000'	0.0000'	0.0000'	0.0000'	0.0000'	0.0000'	0.0000'
ABalaapppp'	AB'	Unspecified'	0.0068±0.0191'	0.0000'	0.0000'	0.0000'	0.0000'	0.0541'	0.0000'	0.0000'	0.0000'
MSapapap'	MS'	Muscle'	0.0068±0.0110'	0.0088'	0.0000'	0.0000'	0.0000'	0.0149'	0.0000'	0.0000'	0.0303'
ABprapappp'	AB'	Unspecified'	0.0067±0.0133'	0.0357'	0.0000'	0.0000'	0.0000'	0.0182'	0.0000'	0.0000'	0.0000'
Capapp'	C'	Muscle'	0.0067±0.0131'	0.0000'	0.0192'	0.0000'	0.0000'	0.0000'	0.0000'	0.0345'	0.0000'
ABalaaaalp'	AB'	Unspecified'	0.0067±0.0093'	0.0169'	0.0000'	0.0182'	0.0000'	0.0000'	0.0000'	0.0000'	0.0185'
Capapa'	C'	Muscle'	0.0067±0.0189'	0.0000'	0.0000'	0.0000'	0.0000'	0.0000'	0.0000'	0.0536'	0.0000'
Cppaapp'	C'	Muscle'	0.0066±0.0186'	0.0526'	0.0000'	0.0000'	0.0000'	0.0000'	0.0000'	0.0000'	0.0000'
MSpaa'	MS'	Unspecified'	0.0066±0.0186'	0.0000'	0.0000'	0.0000'	0.0000'	0.0000'	0.0000'	0.0526'	0.0000'
ABaraapppp'	AB'	Pharynx'	0.0065±0.0130'	0.0172'	0.0000'	0.0000'	0.0000'	0.0351'	0.0000'	0.0000'	0.0000'
ABaraappap'	AB'	Pharynx'	0.0064±0.0119'	0.0000'	0.0000'	0.0263'	0.0000'	0.0000'	0.0250'	0.0000'	0.0000'
MSapppa'	MS'	Muscle'	0.0064±0.0181'	0.0000'	0.0000'	0.0000'	0.0513'	0.0000'	0.0000'	0.0000'	0.0000'
ABalpaappa'	AB'	Skin'	0.0064±0.0180'	0.0000'	0.0000'	0.0000'	0.0000'	0.0000'	0.0000'	0.0508'	0.0000'
ABalaap'	AB'	Unspecified'	0.0063±0.0177'	0.0000'	0.0000'	0.0000'	0.0000'	0.0500'	0.0000'	0.0000'	0.0000'
ABprpappap'	AB'	Neuron'	0.0061±0.0172'	0.0000'	0.0000'	0.0488'	0.0000'	0.0000'	0.0000'	0.0000'	0.0000'
ABalapapap'	AB'	Unspecified'	0.0060±0.0168'	0.0476'	0.0000'	0.0000'	0.0000'	0.0000'	0.0000'	0.0000'	0.0000'
ABprapppaa'	AB'	Unspecified'	0.0059±0.0115'	0.0000'	0.0169'	0.0000'	0.0000'	0.0000'	0.0000'	0.0303'	0.0000'
MSpaaappa'	MS'	Pharynx'	0.0058±0.0108'	0.0230'	0.0000'	0.0000'	0.0000'	0.0000'	0.0238'	0.0000'	0.0000'
ABplpapapp'	AB'	Neuron'	0.0058±0.0164'	0.0000'	0.0000'	0.0000'	0.0000'	0.0000'	0.0465'	0.0000'	0.0000'
ABplaapp'	AB'	Skin'	0.0057±0.0161'	0.0000'	0.0000'	0.0000'	0.0000'	0.0000'	0.0000'	0.0455'	0.0000'
MSapaap'	MS'	Unspecified'	0.0057±0.0161'	0.0000'	0.0000'	0.0000'	0.0000'	0.0000'	0.0455'	0.0000'	0.0000'
ABprpapapp'	AB'	Neuron'	0.0056±0.0104'	0.0000'	0.0000'	0.0000'	0.0000'	0.0000'	0.0233'	0.0217'	0.0000'
ABplpaapaa'	AB'	Neuron'	0.0056±0.0157'	0.0000'	0.0000'	0.0000'	0.0000'	0.0444'	0.0000'	0.0000'	0.0000'
ABprapaaaa'	AB'	Unspecified'	0.0056±0.0157'	0.0000'	0.0000'	0.0444'	0.0000'	0.0000'	0.0000'	0.0000'	0.0000'
ABprpapaap'	AB'	Neuron'	0.0056±0.0157'	0.0000'	0.0000'	0.0000'	0.0000'	0.0444'	0.0000'	0.0000'	0.0000'
ABplaaaa'	AB'	Unspecified'	0.0054±0.0154'	0.0000'	0.0000'	0.0000'	0.0000'	0.0435'	0.0000'	0.0000'	0.0000'
ABprppppaa'	AB'	Unspecified'	0.0054±0.0154'	0.0435'	0.0000'	0.0000'	0.0000'	0.0000'	0.0000'	0.0000'	0.0000'
Cpap'	C'	Skin'	0.0054±0.0154'	0.0000'	0.0435'	0.0000'	0.0000'	0.0000'	0.0000'	0.0000'	0.0000'
ABplapaaapa'	AB'	Neuron'	0.0054±0.0113'	0.0120'	0.0000'	0.0313'	0.0000'	0.0000'	0.0000'	0.0000'	0.0000'
ABplapaaap'	AB'	Neuron'	0.0054±0.0100'	0.0000'	0.0000'	0.0233'	0.0200'	0.0000'	0.0000'	0.0000'	0.0000'
ABplaaaaapp'	AB'	Neuron'	0.0054±0.0100'	0.0000'	0.0000'	0.0000'	0.0196'	0.0000'	0.0000'	0.0233'	0.0000'
ABalppappa'	AB'	Neuron'	0.0053±0.0150'	0.0000'	0.0000'	0.0000'	0.0000'	0.0000'	0.0000'	0.0000'	0.0426'
ABplpppaaa'	AB'	Neuron'	0.0053±0.0150'	0.0000'	0.0000'	0.0000'	0.0000'	0.0000'	0.0426'	0.0000'	0.0000'
ABprpppppa'	AB'	Unspecified'	0.0053±0.0150'	0.0000'	0.0000'	0.0000'	0.0000'	0.0426'	0.0000'	0.0000'	0.0000'
ABarpapp'	AB'	Skin'	0.0052±0.0147'	0.0000'	0.0000'	0.0000'	0.0000'	0.0000'	0.0000'	0.0417'	0.0000'
Cap'	C'	Muscle'	0.0052±0.0147'	0.0000'	0.0417'	0.0000'	0.0000'	0.0000'	0.0000'	0.0000'	0.0000'
ABprppaapp'	AB'	Neuron'	0.0052±0.0096'	0.0000'	0.0000'	0.0000'	0.0000'	0.0222'	0.0192'	0.0000'	0.0000'
ABplapaaaa'	AB'	Unspecified'	0.0052±0.0096'	0.0000'	0.0000'	0.0217'	0.0196'	0.0000'	0.0000'	0.0000'	0.0000'
ABplapapaa'	AB'	Unspecified'	0.0051±0.0097'	0.0155'	0.0000'	0.0000'	0.0000'	0.0000'	0.0000'	0.0000'	0.0250'
ABalpaaapa'	AB'	Unspecified'	0.0050±0.0093'	0.0000'	0.0000'	0.0208'	0.0000'	0.0000'	0.0000'	0.0000'	0.0192'
ABalpaaa'	AB'	Unspecified'	0.0050±0.0141'	0.0000'	0.0000'	0.0000'	0.0000'	0.0400'	0.0000'	0.0000'	0.0000'
ABprppapap'	AB'	Neuron'	0.0049±0.0139'	0.0000'	0.0000'	0.0000'	0.0000'	0.0392'	0.0000'	0.0000'	0.0000'
ABalaaappl'	AB'	Unspecified'	0.0046±0.0131'	0.0000'	0.0000'	0.0000'	0.0000'	0.0000'	0.0370'	0.0000'	0.0000'
ABplapapppp'	AB'	Unspecified'	0.0045±0.0129'	0.0364'	0.0000'	0.0000'	0.0000'	0.0000'	0.0000'	0.0000'	0.0000'
Cppaapa'	C'	Muscle'	0.0044±0.0124'	0.0351'	0.0000'	0.0000'	0.0000'	0.0000'	0.0000'	0.0000'	0.0000'
ABalapapp'	AB'	Unspecified'	0.0043±0.0122'	0.0000'	0.0000'	0.0000'	0.0000'	0.0000'	0.0345'	0.0000'	0.0000'
ABalpappa'	AB'	Unspecified'	0.0043±0.0122'	0.0000'	0.0000'	0.0000'	0.0000'	0.0000'	0.0000'	0.0345'	0.0000'
ABarpapaa'	AB'	Unspecified'	0.0043±0.0122'	0.0000'	0.0345'	0.0000'	0.0000'	0.0000'	0.0000'	0.0000'	0.0000'
ABplappaaa'	AB'	Skin'	0.0043±0.0084'	0.0000'	0.0123'	0.0000'	0.0220'	0.0000'	0.0000'	0.0000'	0.0000'
ABalapppa'	AB'	Unspecified'	0.0042±0.0118'	0.0000'	0.0000'	0.0000'	0.0000'	0.0000'	0.0333'	0.0000'	0.0000'
ABalapppp'	AB'	Unspecified'	0.0042±0.0118'	0.0000'	0.0000'	0.0333'	0.0000'	0.0000'	0.0000'	0.0000'	0.0000'
ABplapaaa'	AB'	Unspecified'	0.0042±0.0118'	0.0000'	0.0333'	0.0000'	0.0000'	0.0000'	0.0000'	0.0000'	0.0000'
MSapaaa'	MS'	Unspecified'	0.0042±0.0118'	0.0000'	0.0000'	0.0000'	0.0000'	0.0000'	0.0333'	0.0000'	0.0000'
ABalppppa'	AB'	Unspecified'	0.0040±0.0114'	0.0000'	0.0000'	0.0000'	0.0000'	0.0000'	0.0323'	0.0000'	0.0000'
ABprpppap'	AB'	Unspecified'	0.0040±0.0114'	0.0000'	0.0000'	0.0323'	0.0000'	0.0000'	0.0000'	0.0000'	0.0000'
ABalaaaar'	AB'	Unspecified'	0.0039±0.0110'	0.0000'	0.0000'	0.0000'	0.0000'	0.0000'	0.0000'	0.0000'	0.0313'
ABarpaaap'	AB'	Unspecified'	0.0039±0.0110'	0.0000'	0.0000'	0.0000'	0.0000'	0.0000'	0.0313'	0.0000'	0.0000'
ABarppaap'	AB'	Unspecified'	0.0039±0.0110'	0.0000'	0.0000'	0.0000'	0.0313'	0.0000'	0.0000'	0.0000'	0.0000'
ABprppapp'	AB'	Neuron'	0.0039±0.0110'	0.0000'	0.0313'	0.0000'	0.0000'	0.0000'	0.0000'	0.0000'	0.0000'
ABprapapaa'	AB'	Unspecified'	0.0039±0.0110'	0.0310'	0.0000'	0.0000'	0.0000'	0.0000'	0.0000'	0.0000'	0.0000'
ABalappaapa'	AB'	Neuron'	0.0038±0.0109'	0.0308'	0.0000'	0.0000'	0.0000'	0.0000'	0.0000'	0.0000'	0.0000'
ABaraaaaa'	AB'	Pharynx'	0.0038±0.0107'	0.0000'	0.0000'	0.0303'	0.0000'	0.0000'	0.0000'	0.0000'	0.0000'
Dpppaa'	D'	Muscle'	0.0038±0.0093'	0.0227'	0.0000'	NaN'	0.0000'	NaN'	0.0000'	0.0000'	0.0000'
ABalppppppaa'	AB'	Neuron'	0.0037±0.0091'	0.0222'	0.0000'	0.0000'	0.0000'	0.0000'	NaN'	NaN'	0.0000'
ABplapapa'	AB'	Unspecified'	0.0037±0.0104'	0.0000'	0.0000'	0.0000'	0.0294'	0.0000'	0.0000'	0.0000'	0.0000'
MSaapap'	MS'	Unspecified'	0.0037±0.0104'	0.0000'	0.0000'	0.0000'	0.0000'	0.0000'	0.0000'	0.0294'	0.0000'
ABalappaa'	AB'	Unspecified'	0.0035±0.0098'	0.0278'	0.0000'	0.0000'	0.0000'	0.0000'	0.0000'	0.0000'	0.0000'
ABaraaaap'	AB'	Unspecified'	0.0035±0.0098'	0.0000'	0.0000'	0.0278'	0.0000'	0.0000'	0.0000'	0.0000'	0.0000'
ABprpppapa'	AB'	Unspecified'	0.0035±0.0098'	0.0000'	0.0000'	0.0000'	0.0000'	0.0000'	0.0000'	0.0278'	0.0000'
Capa'	C'	Muscle'	0.0034±0.0096'	0.0000'	0.0000'	0.0000'	0.0000'	0.0000'	0.0000'	0.0270'	0.0000'
Da'	D'	Muscle'	0.0034±0.0096'	0.0000'	0.0000'	0.0000'	0.0000'	0.0000'	0.0000'	0.0270'	0.0000'
ABarapapap'	AB'	Unspecified'	0.0033±0.0093'	0.0000'	0.0263'	0.0000'	0.0000'	0.0000'	0.0000'	0.0000'	0.0000'
ABprppapaa'	AB'	Neuron'	0.0032±0.0091'	0.0000'	0.0000'	0.0000'	0.0000'	0.0256'	0.0000'	0.0000'	0.0000'
ABalppappp'	AB'	Unspecified'	0.0030±0.0086'	0.0000'	0.0000'	0.0000'	0.0000'	0.0000'	0.0000'	0.0000'	0.0244'
ABplppppap'	AB'	Others'	0.0030±0.0084'	0.0000'	0.0000'	0.0000'	0.0000'	0.0000'	0.0000'	0.0238'	0.0000'
ABprpapapa'	AB'	Unspecified'	0.0030±0.0084'	0.0000'	0.0000'	0.0000'	0.0000'	0.0238'	0.0000'	0.0000'	0.0000'
ABalpppppa'	AB'	Neuron'	0.0029±0.0082'	0.0000'	0.0000'	0.0000'	0.0000'	0.0233'	0.0000'	0.0000'	0.0000'
MSpapaaa'	MS'	Pharynx'	0.0029±0.0082'	0.0000'	0.0000'	0.0000'	0.0233'	0.0000'	0.0000'	0.0000'	0.0000'
ABalappppp'	AB'	Neuron'	0.0028±0.0080'	0.0000'	0.0000'	0.0000'	0.0000'	0.0000'	0.0000'	0.0000'	0.0227'
ABprpaaaap'	AB'	Unspecified'	0.0028±0.0080'	0.0000'	0.0000'	0.0000'	0.0000'	0.0000'	0.0227'	0.0000'	0.0000'
ABalppppaa'	AB'	Unspecified'	0.0028±0.0079'	0.0000'	0.0000'	0.0000'	0.0000'	0.0000'	0.0000'	0.0000'	0.0222'
ABplpapaaa'	AB'	Neuron'	0.0028±0.0079'	0.0000'	0.0222'	0.0000'	0.0000'	0.0000'	0.0000'	0.0000'	0.0000'
ABprppaapa'	AB'	Unspecified'	0.0028±0.0079'	0.0000'	0.0000'	0.0000'	0.0000'	0.0222'	0.0000'	0.0000'	0.0000'
Cppppa'	C'	Muscle'	0.0028±0.0079'	0.0000'	0.0000'	0.0000'	0.0000'	0.0000'	0.0222'	0.0000'	0.0000'
Eara'	E'	Intestine'	0.0027±0.0077'	0.0000'	0.0217'	0.0000'	0.0000'	0.0000'	0.0000'	0.0000'	0.0000'
Eplp'	E'	Intestine'	0.0027±0.0075'	0.0000'	0.0213'	0.0000'	0.0000'	0.0000'	0.0000'	0.0000'	0.0000'
ABplppappa'	AB'	Neuron'	0.0025±0.0069'	0.0000'	0.0000'	0.0000'	0.0000'	0.0000'	0.0000'	0.0196'	0.0000'
Cppaap'	C'	Muscle'	0.0025±0.0069'	0.0000'	0.0000'	0.0196'	0.0000'	0.0000'	0.0000'	0.0000'	0.0000'
ABprpaaapa'	AB'	Neuron'	0.0023±0.0065'	0.0000'	0.0000'	0.0000'	0.0000'	0.0000'	0.0000'	0.0000'	0.0185'
P4'	/'	Germ Cell'	0.0023±0.0065'	0.0000'	0.0000'	0.0000'	0.0000'	0.0000'	0.0000'	0.0185'	0.0000'
ABprpppaap'	AB'	Neuron'	0.0022±0.0063'	0.0000'	0.0000'	0.0000'	0.0179'	0.0000'	0.0000'	0.0000'	0.0000'
Capppp'	C'	Muscle'	0.0022±0.0063'	0.0000'	0.0000'	0.0000'	0.0000'	0.0000'	0.0000'	0.0179'	0.0000'
ABalapaapa'	AB'	Unspecified'	0.0022±0.0061'	0.0000'	0.0000'	0.0000'	0.0000'	0.0000'	0.0172'	0.0000'	0.0000'
MSpaapaa'	MS'	Unspecified'	0.0022±0.0061'	0.0000'	0.0000'	0.0000'	0.0172'	0.0000'	0.0000'	0.0000'	0.0000'
ABalapapapa'	AB'	Unspecified'	0.0016±0.0045'	0.0128'	0.0000'	0.0000'	0.0000'	0.0000'	0.0000'	0.0000'	0.0000'
Note 1: The cell lineages derived from the 5 somatic founder cells (i.e., AB, MS, E, C, and D) are marked with their names, while the germline stem cells (i.e., P0, P1, P2, P3, P4, and Z2/Z3) and the mother cell of MS and E (i.e., EMS) are marked with "/".
Note 2: The cell fate is obtained from X. Ma et al., A 4D single-cell protein atlas of transcription factors delineates spatiotemporal patterning during embryogenesis. Nat. Methods 18, 893-902 (2021). doi: 10.1038/s41592-021-01216-1; pmid: 34312566. The apoptotic fate has been manually checked for all cells one by one according to J.E. Sulston, E. Schierenberg, J.G. White, J.N. Thomson, The embry…
Note 3: "NaN" means no valid data recorded in this embryo sample for loss rate calculation.

## Sheet: Cell lineage
Cell lineage	Data-point loss rate	Embryo sample
	Total'	WT_Sample1	WT_Sample2	WT_Sample3	WT_Sample4	WT_Sample5	WT_Sample6	WT_Sample7	WT_Sample8
AB'	0.0630±0.0225'	0.1082'	0.0610'	0.0483'	0.0854'	0.0536'	0.0450'	0.0573'	0.0452'
MS'	0.0337±0.0216'	0.0626'	0.0231'	0.0205'	0.0246'	0.0181'	0.0281'	0.0733'	0.0191'
E'	0.0810±0.1263'	0.0275'	0.3873'	0.0824'	0.0586'	0.0080'	0.0074'	0.0481'	0.0289'
C'	0.1953±0.0956'	0.2631'	0.2636'	0.2611'	0.2906'	0.0680'	0.1203'	0.0613'	0.2344'
D'	0.1438±0.0907'	0.1262'	0.3408'	0.0963'	0.0673'	0.0576'	0.1277'	0.1400'	0.1945'

## Sheet: Cell fate
Cell fate	Data-point loss rate	Embryo sample
	Total'	WT_Sample1	WT_Sample2	WT_Sample3	WT_Sample4	WT_Sample5	WT_Sample6	WT_Sample7	WT_Sample8
Neuron'	0.0906±0.0220'	0.1178'	0.0884'	0.0705'	0.1200'	0.0821'	0.0622'	0.1077'	0.0761'
Pharynx'	0.0598±0.0290'	0.1211'	0.0726'	0.0483'	0.0745'	0.0430'	0.0429'	0.0444'	0.0313'
Skin'	0.1730±0.0749'	0.2934'	0.1959'	0.1863'	0.2541'	0.0977'	0.1272'	0.0766'	0.1528'
Muscle'	0.0583±0.0278'	0.0888'	0.0927'	0.0399'	0.0276'	0.0217'	0.0527'	0.0840'	0.0591'
Intestine'	0.0810±0.1263'	0.0275'	0.3873'	0.0824'	0.0586'	0.0080'	0.0074'	0.0481'	0.0289'
