# Supplementary material for: Cell lineage-resolved embryonic morphological map reveals novel signaling regulating cell fate and size asymmetry
Source: Research Square preprint supplement (doi:10.21203/rs.3.rs-4664717/v1), 2024-08-30
Supplement: Supplementary file 27 [file Table S9.xlsx]

## Sheet: Table S
Mother cell	Daughter cell (D1, a/l/d)	Daughter cell (D2, p/r/v)	Cell volume asymmetry	Cell surface area asymmetry	Cell cycle length asymmetry
			(VD1-VD2)/(VD1+VD2)	(SD1-SD2)/(SD1+SD2)	(LD1-LD2)/(LD1+LD2)
ABa'	ABal'	ABar'	-0.0348±0.0192'	-0.0657±0.0150'	0.0006±0.0268'
ABal'	ABala'	ABalp'	-0.0682±0.0368'	-0.0853±0.0314'	-0.0054±0.0154'
ABala'	ABalaa'	ABalap'	-0.1018±0.0398'	-0.0743±0.0294'	-0.0004±0.0265'
ABalaa'	ABalaaa'	ABalaap'	-0.0232±0.0336'	-0.0087±0.0309'	-0.0066±0.0183'
ABalaaa'	ABalaaaa'	ABalaaap'	-0.1362±0.0316'	-0.0810±0.0210'	0.0675±0.0241'
ABalaaaa'	ABalaaaal'	ABalaaaar'	0.0093±0.0538'	0.0025±0.0346'	-0.0143±0.0183'
ABalaaaal'	ABalaaaala'	ABalaaaalp'	-0.0477±0.0431'	-0.0371±0.0330'	0.0222±0.0342'
ABp'	ABpl'	ABpr'	0.0381±0.0420'	0.0405±0.0367'	0.0060±0.0168'
ABar'	ABara'	ABarp'	-0.1200±0.0439'	-0.0583±0.0434'	0.0109±0.0201'
ABalp'	ABalpa'	ABalpp'	0.0110±0.0124'	-0.0038±0.0106'	-0.0188±0.0156'
ABalap'	ABalapa'	ABalapp'	-0.0853±0.0509'	-0.0916±0.0420'	-0.0032±0.0171'
ABalaap'	ABalaapa'	ABalaapp'	-0.1289±0.0233'	-0.0858±0.0214'	0.0617±0.0294'
ABalaaap'	ABalaaapa'	ABalaaapp'	-0.0082±0.0527'	-0.0076±0.0306'	-0.0040±0.0258'
ABalaaaar'	ABalaaaarl'	ABalaaaarr'	-0.0329±0.0512'	-0.0272±0.0360'	-0.0012±0.0332'
ABpl'	ABpla'	ABplp'	0.1345±0.0278'	0.0960±0.0243'	-0.0164±0.0227'
ABara'	ABaraa'	ABarap'	0.0076±0.0170'	0.0064±0.0164'	-0.0000±0.0162'
ABalpa'	ABalpaa'	ABalpap'	-0.1008±0.0276'	-0.0780±0.0189'	0.0098±0.0135'
ABalapa'	ABalapaa'	ABalapap'	-0.0636±0.0252'	-0.0219±0.0167'	0.0240±0.0206'
ABalaapa'	ABalaapaa'	ABalaapap'	-0.0189±0.0233'	-0.0209±0.0148'	0.0040±0.0160'
ABalaaapa'	ABalaaapal'	ABalaaapar'	0.1855±0.0725'	0.1261±0.0439'	-0.1171±0.0293'
ABpr'	ABpra'	ABprp'	0.0709±0.0231'	0.0510±0.0185'	-0.0268±0.0223'
ABarp'	ABarpa'	ABarpp'	-0.0476±0.0286'	-0.0238±0.0132'	-0.0171±0.0322'
ABalpp'	ABalppa'	ABalppp'	-0.1607±0.0225'	-0.1103±0.0206'	0.0297±0.0082'
ABalapp'	ABalappa'	ABalappp'	-0.1770±0.0289'	-0.1078±0.0238'	0.0702±0.0268'
ABalaapp'	ABalaappa'	ABalaappp'	-0.1322±0.0682'	-0.0897±0.0426'	0.0517±0.0262'
ABalaaapp'	ABalaaappl'	ABalaaappr'	-0.1920±0.0828'	-0.1425±0.0541'	0.1107±0.0161'
ABpla'	ABplaa'	ABplap'	0.0332±0.0239'	0.0220±0.0152'	0.0038±0.0107'
ABaraa'	ABaraaa'	ABaraap'	-0.0875±0.0308'	-0.0558±0.0350'	0.0201±0.0237'
ABalpaa'	ABalpaaa'	ABalpaap'	-0.3155±0.0343'	-0.2088±0.0273'	0.0894±0.0268'
ABalapaa'	ABalapaaa'	ABalapaap'	-0.0967±0.0445'	-0.0567±0.0233'	0.0317±0.0177'
ABalaapaa'	ABalaapaaa'	ABalaapaap'	-0.0730±0.1040'	-0.0484±0.0684'	0.0579±0.0182'
ABplp'	ABplpa'	ABplpp'	0.0632±0.0129'	0.0377±0.0152'	-0.0074±0.0136'
ABarap'	ABarapa'	ABarapp'	0.0411±0.0342'	0.0145±0.0250'	-0.0064±0.0234'
ABalpap'	ABalpapa'	ABalpapp'	-0.1579±0.0277'	-0.1126±0.0214'	0.0396±0.0105'
ABalapap'	ABalapapa'	ABalapapp'	-0.1883±0.0456'	-0.1195±0.0312'	0.0661±0.0198'
ABpra'	ABpraa'	ABprap'	0.0386±0.0313'	0.0218±0.0304'	0.0074±0.0136'
ABarpa'	ABarpaa'	ABarpap'	0.0107±0.0569'	-0.0050±0.0462'	-0.0101±0.0140'
ABalppa'	ABalppaa'	ABalppap'	-0.2553±0.0341'	-0.1717±0.0264'	0.0884±0.0222'
ABalappa'	ABalappaa'	ABalappap'	-0.2528±0.0666'	-0.1704±0.0418'	0.0863±0.0150'
ABprp'	ABprpa'	ABprpp'	0.0502±0.0235'	0.0366±0.0199'	-0.0002±0.0219'
ABarpp'	ABarppa'	ABarppp'	-0.0319±0.0265'	-0.0291±0.0317'	-0.0103±0.0143'
ABalppp'	ABalpppa'	ABalpppp'	-0.1170±0.0261'	-0.0634±0.0200'	0.0357±0.0235'
ABalappp'	ABalapppa'	ABalapppp'	-0.0461±0.0563'	-0.0305±0.0353'	0.0024±0.0235'
ABalaappp'	ABalaapppa'	ABalaapppp'	-0.1867±0.0292'	-0.1319±0.0219'	0.1561±0.0237'
ABplaa'	ABplaaa'	ABplaap'	-0.1535±0.0420'	-0.1102±0.0211'	0.0207±0.0241'
ABaraaa'	ABaraaaa'	ABaraaap'	-0.2781±0.0390'	-0.1859±0.0344'	0.0799±0.0253'
ABalpaaa'	ABalpaaaa'	ABalpaaap'	-0.0198±0.0492'	-0.0101±0.0317'	0.0076±0.0114'
ABalapaaa'	ABalapaaaa'	ABalapaaap'	-0.2741±0.0289'	-0.1751±0.0194'	0.2394±0.0473'
ABplap'	ABplapa'	ABplapp'	-0.0242±0.0315'	-0.0191±0.0298'	-0.0100±0.0138'
ABaraap'	ABaraapa'	ABaraapp'	-0.0119±0.0306'	-0.0139±0.0231'	0.0191±0.0140'
ABalpaap'	ABalpaapa'	ABalpaapp'	0.2584±0.0396'	0.1542±0.0295'	-0.0934±0.0103'
ABalapaap'	ABalapaapa'	ABalapaapp'	-0.2309±0.0427'	-0.1553±0.0266'	0.1408±0.0291'
ABplpa'	ABplpaa'	ABplpap'	-0.0798±0.0372'	-0.0446±0.0256'	0.0137±0.0147'
ABarapa'	ABarapaa'	ABarapap'	-0.1640±0.0257'	-0.1151±0.0229'	0.0495±0.0230'
ABalpapa'	ABalpapaa'	ABalpapap'	-0.1868±0.0661'	-0.1092±0.0446'	0.0105±0.0155'
ABplpp'	ABplppa'	ABplppp'	-0.0910±0.0186'	-0.0551±0.0212'	0.0228±0.0093'
ABarapp'	ABarappa'	ABarappp'	-0.0456±0.0312'	-0.0247±0.0291'	0.0187±0.0179'
ABalpapp'	ABalpappa'	ABalpappp'	-0.1340±0.0432'	-0.0835±0.0284'	0.0046±0.0127'
ABalapapp'	ABalapappa'	ABalapappp'	0.1365±0.0539'	0.0790±0.0328'	-0.0951±0.0133'
ABpraa'	ABpraaa'	ABpraap'	-0.1748±0.0588'	-0.1104±0.0409'	0.0233±0.0169'
ABarpaa'	ABarpaaa'	ABarpaap'	-0.4375±0.0432'	-0.2905±0.0286'	0.1036±0.0230'
ABalppaa'	ABalppaaa'	ABalppaap'	0.0077±0.0423'	0.0054±0.0303'	0.0038±0.0136'
ABprap'	ABprapa'	ABprapp'	-0.0498±0.0263'	-0.0292±0.0211'	-0.0071±0.0185'
ABarpap'	ABarpapa'	ABarpapp'	-0.0298±0.0324'	-0.0212±0.0222'	-0.0130±0.0152'
ABalppap'	ABalppapa'	ABalppapp'	-0.1227±0.0437'	-0.0749±0.0300'	0.0286±0.0134'
ABalappap'	ABalappapa'	ABalappapp'	-0.2232±0.0583'	-0.1434±0.0414'	0.2112±0.0244'
ABprpa'	ABprpaa'	ABprpap'	-0.0895±0.0372'	-0.0474±0.0271'	0.0164±0.0136'
ABarppa'	ABarppaa'	ABarppap'	-0.0858±0.0227'	-0.0484±0.0292'	-0.0075±0.0228'
ABalpppa'	ABalpppaa'	ABalpppap'	-0.1802±0.0353'	-0.1157±0.0252'	0.0610±0.0190'
ABalapppa'	ABalapppaa'	ABalapppap'	-0.1051±0.0614'	-0.0630±0.0389'	0.0719±0.0335'
ABprpp'	ABprppa'	ABprppp'	-0.1331±0.0330'	-0.0844±0.0294'	0.0192±0.0174'
ABarppp'	ABarpppa'	ABarpppp'	-0.0710±0.0208'	-0.0473±0.0178'	-0.0118±0.0249'
ABalpppp'	ABalppppa'	ABalppppp'	-0.1668±0.0456'	-0.1059±0.0285'	0.0671±0.0185'
ABalapppp'	ABalappppa'	ABalappppp'	0.1412±0.0429'	0.0901±0.0261'	-0.0794±0.0252'
ABplaaa'	ABplaaaa'	ABplaaap'	-0.1241±0.0207'	-0.0780±0.0169'	-0.0237±0.0133'
ABaraaaa'	ABaraaaaa'	ABaraaaap'	0.1379±0.0354'	0.0833±0.0215'	-0.0483±0.0185'
ABalpaaaa'	ABalpaaaaa'	ABalpaaaap'	0.0675±0.0473'	0.0444±0.0300'	-0.0365±0.0140'
ABplaap'	ABplaapa'	ABplaapp'	-0.2435±0.0419'	-0.1580±0.0405'	0.0353±0.0201'
ABaraaap'	ABaraaapa'	ABaraaapp'	0.2339±0.0476'	0.1436±0.0305'	-0.0977±0.0158'
ABalpaaap'	ABalpaaapa'	ABalpaaapp'	-0.0163±0.0475'	-0.0175±0.0315'	0.0164±0.0184'
ABplapa'	ABplapaa'	ABplapap'	-0.1627±0.0333'	-0.1056±0.0222'	0.0479±0.0141'
ABaraapa'	ABaraapaa'	ABaraapap'	-0.0949±0.0246'	-0.0681±0.0172'	0.0086±0.0127'
ABalpaapa'	ABalpaapaa'	ABalpaapap'	-0.3986±0.0351'	-0.2931±0.0232'	0.1699±0.0316'
ABplapp'	ABplappa'	ABplappp'	0.2261±0.0461'	0.1308±0.0328'	-0.0471±0.0098'
ABaraapp'	ABaraappa'	ABaraappp'	-0.0898±0.0304'	-0.0668±0.0198'	0.0144±0.0181'
ABalpaapp'	ABalpaappa'	ABalpaappp'	-0.1988±0.0377'	-0.1309±0.0292'	0.0662±0.0197'
ABplpaa'	ABplpaaa'	ABplpaap'	-0.0125±0.0280'	0.0066±0.0180'	-0.0001±0.0116'
ABarapaa'	ABarapaaa'	ABarapaap'	-0.2037±0.0334'	-0.1324±0.0224'	0.0693±0.0151'
ABalpapaa'	ABalpapaaa'	ABalpapaap'	0.2027±0.0908'	0.1285±0.0743'	-0.1112±0.0215'
ABplpap'	ABplpapa'	ABplpapp'	-0.1516±0.0434'	-0.0899±0.0218'	0.0306±0.0164'
ABarapap'	ABarapapa'	ABarapapp'	-0.1994±0.0349'	-0.1298±0.0258'	0.0490±0.0161'
ABalpapap'	ABalpapapa'	ABalpapapp'	0.1840±0.1013'	0.1257±0.0694'	-0.0673±0.0341'
ABplppa'	ABplppaa'	ABplppap'	-0.1295±0.0288'	-0.0837±0.0179'	0.0403±0.0152'
ABarappa'	ABarappaa'	ABarappap'	-0.1721±0.0263'	-0.1135±0.0194'	0.0391±0.0202'
ABalpappa'	ABalpappaa'	ABalpappap'	-0.2217±0.0376'	-0.1483±0.0282'	0.1268±0.0324'
ABplppp'	ABplpppa'	ABplpppp'	-0.0731±0.0415'	-0.0417±0.0233'	0.0166±0.0102'
ABarappp'	ABarapppa'	ABarapppp'	-0.0789±0.0295'	-0.0452±0.0195'	0.0210±0.0119'
ABalpappp'	ABalpapppa'	ABalpapppp'	-0.5245±0.0484'	-0.3694±0.0443'	0.3300±0.0279'
ABpraaa'	ABpraaaa'	ABpraaap'	-0.1761±0.0418'	-0.1079±0.0333'	0.0488±0.0098'
ABarpaaa'	ABarpaaaa'	ABarpaaap'	0.0780±0.0792'	0.0594±0.0493'	-0.0260±0.0216'
ABpraap'	ABpraapa'	ABpraapp'	-0.2394±0.0302'	-0.1610±0.0135'	0.0300±0.0162'
ABarpaap'	ABarpaapa'	ABarpaapp'	-0.0583±0.0341'	-0.0360±0.0238'	0.0064±0.0088'
ABprapa'	ABprapaa'	ABprapap'	-0.1937±0.0195'	-0.1251±0.0198'	0.0397±0.0219'
ABarpapa'	ABarpapaa'	ABarpapap'	-0.0708±0.0394'	-0.0406±0.0242'	0.0000±0.0231'
ABalppapa'	ABalppapaa'	ABalppapap'	-0.1076±0.0550'	-0.0656±0.0405'	0.0325±0.0250'
ABprapp'	ABprappa'	ABprappp'	0.2391±0.0383'	0.1598±0.0302'	-0.0103±0.0251'
ABarpapp'	ABarpappa'	ABarpappp'	-0.2846±0.0280'	-0.1928±0.0210'	0.0576±0.0253'
ABalppapp'	ABalppappa'	ABalppappp'	-0.0396±0.0670'	-0.0203±0.0489'	0.0502±0.0271'
ABprpaa'	ABprpaaa'	ABprpaap'	-0.0303±0.0398'	-0.0191±0.0319'	0.0054±0.0156'
ABarppaa'	ABarppaaa'	ABarppaap'	-0.1819±0.0420'	-0.1248±0.0321'	0.0453±0.0150'
ABalpppaa'	ABalpppaaa'	ABalpppaap'	0.0596±0.0703'	0.0446±0.0430'	-0.0306±0.0270'
ABprpap'	ABprpapa'	ABprpapp'	-0.1001±0.0151'	-0.0554±0.0112'	0.0194±0.0079'
ABarppap'	ABarppapa'	ABarppapp'	0.0172±0.0272'	0.0078±0.0179'	-0.0038±0.0212'
ABalpppap'	ABalpppapa'	ABalpppapp'	-0.0462±0.0502'	-0.0264±0.0314'	0.0464±0.0241'
ABprppa'	ABprppaa'	ABprppap'	-0.1664±0.0233'	-0.1009±0.0199'	0.0441±0.0223'
ABarpppa'	ABarpppaa'	ABarpppap'	-0.1444±0.0390'	-0.0973±0.0235'	0.0420±0.0145'
ABalppppa'	ABalppppaa'	ABalppppap'	-0.0743±0.0183'	-0.0396±0.0143'	0.0336±0.0164'
ABprppp'	ABprpppa'	ABprpppp'	-0.1138±0.0276'	-0.0757±0.0212'	0.0030±0.0146'
ABarpppp'	ABarppppa'	ABarppppp'	0.0198±0.0104'	0.0101±0.0082'	-0.0240±0.0158'
ABalppppp'	ABalpppppa'	ABalpppppp'	-0.2978±0.0511'	-0.2132±0.0391'	0.1612±0.0198'
ABplaaaa'	ABplaaaaa'	ABplaaaap'	-0.0982±0.0418'	-0.0603±0.0302'	0.0034±0.0192'
ABaraaaaa'	ABaraaaaaa'	ABaraaaaap'	-0.0064±0.0492'	-0.0058±0.0309'	-0.0006±0.0164'
ABplaaap'	ABplaaapa'	ABplaaapp'	-0.2863±0.0530'	-0.1856±0.0361'	0.0482±0.0228'
ABplaapa'	ABplaapaa'	ABplaapap'	-0.0557±0.0243'	-0.0233±0.0143'	0.0078±0.0117'
ABaraaapa'	ABaraaapaa'	ABaraaapap'	-0.3330±0.0467'	-0.2457±0.0343'	0.1161±0.0286'
ABplaapp'	ABplaappa'	ABplaappp'	-0.3222±0.0256'	-0.2214±0.0115'	0.0607±0.0222'
ABaraaapp'	ABaraaappa'	ABaraaappp'	-0.1510±0.0911'	-0.1018±0.0633'	0.0626±0.0362'
ABplapaa'	ABplapaaa'	ABplapaap'	0.0286±0.0635'	0.0233±0.0362'	-0.0307±0.0165'
ABaraapaa'	ABaraapaaa'	ABaraapaap'	-0.1365±0.0365'	-0.0982±0.0213'	0.0732±0.0282'
ABplapap'	ABplapapa'	ABplapapp'	0.0567±0.0271'	0.0428±0.0177'	0.0261±0.0216'
ABaraapap'	ABaraapapa'	ABaraapapp'	0.3468±0.0414'	0.2286±0.0418'	-0.2303±0.0381'
ABplappa'	ABplappaa'	ABplappap'	0.0145±0.0253'	0.0133±0.0146'	0.0099±0.0166'
ABaraappa'	ABaraappaa'	ABaraappap'	-0.2193±0.0238'	-0.1434±0.0139'	0.1213±0.0141'
ABplappp'	ABplapppa'	ABplapppp'	0.0041±0.0552'	-0.0057±0.0388'	0.0038±0.0151'
ABaraappp'	ABaraapppa'	ABaraapppp'	0.4069±0.0411'	0.2773±0.0257'	-0.2430±0.0265'
ABplpaaa'	ABplpaaaa'	ABplpaaap'	0.0512±0.0274'	0.0316±0.0232'	-0.0104±0.0152'
ABarapaaa'	ABarapaaaa'	ABarapaaap'	0.0829±0.0247'	0.0546±0.0143'	-0.0574±0.0390'
ABplpaap'	ABplpaapa'	ABplpaapp'	-0.0717±0.0288'	-0.0484±0.0163'	0.0390±0.0097'
ABarapaap'	ABarapaapa'	ABarapaapp'	-0.3982±0.0591'	-0.2791±0.0449'	0.2035±0.0326'
ABplpapa'	ABplpapaa'	ABplpapap'	-0.0655±0.0515'	-0.0373±0.0356'	0.0359±0.0175'
ABarapapa'	ABarapapaa'	ABarapapap'	-0.0436±0.0477'	-0.0156±0.0360'	0.0604±0.0224'
ABplpapp'	ABplpappa'	ABplpappp'	0.2003±0.1051'	0.1312±0.0643'	-0.0649±0.0354'
ABarapapp'	ABarapappa'	ABarapappp'	-0.4506±0.0397'	-0.3118±0.0368'	0.3503±0.0308'
ABplppaa'	ABplppaaa'	ABplppaap'	-0.0587±0.0407'	-0.0467±0.0235'	0.0423±0.0253'
ABarappaa'	ABarappaaa'	ABarappaap'	0.0485±0.0867'	0.0336±0.0615'	-0.0161±0.0106'
ABplppap'	ABplppapa'	ABplppapp'	0.0464±0.0330'	0.0245±0.0185'	-0.0274±0.0223'
ABarappap'	ABarappapa'	ABarappapp'	0.1298±0.1105'	0.0826±0.0738'	-0.0385±0.0216'
ABplpppa'	ABplpppaa'	ABplpppap'	0.0292±0.0376'	0.0276±0.0281'	-0.0097±0.0252'
ABarapppa'	ABarapppaa'	ABarapppap'	-0.1047±0.0826'	-0.0631±0.0573'	0.0188±0.0310'
ABplpppp'	ABplppppa'	ABplppppp'	0.1374±0.0310'	0.0836±0.0241'	-0.0273±0.0178'
ABarapppp'	ABarappppa'	ABarappppp'	-0.0552±0.0561'	-0.0283±0.0340'	0.0416±0.0271'
ABpraaaa'	ABpraaaaa'	ABpraaaap'	-0.1596±0.1373'	-0.0982±0.0941'	-0.0046±0.1656'
ABarpaaaa'	ABarpaaaaa'	ABarpaaaap'	0.0384±0.0543'	0.0255±0.0353'	0.0205±0.0315'
ABpraaap'	ABpraaapa'	ABpraaapp'	-0.2524±0.0421'	-0.1694±0.0242'	0.0899±0.0156'
ABpraapa'	ABpraapaa'	ABpraapap'	-0.0200±0.0568'	-0.0003±0.0359'	-0.0145±0.0282'
ABpraapp'	ABpraappa'	ABpraappp'	-0.3302±0.0266'	-0.2235±0.0175'	0.0687±0.0208'
ABprapaa'	ABprapaaa'	ABprapaap'	0.0470±0.0437'	0.0340±0.0255'	-0.0433±0.0211'
ABarpapaa'	ABarpapaaa'	ABarpapaap'	-0.3714±0.0639'	-0.2569±0.0404'	0.1743±0.0224'
ABprapap'	ABprapapa'	ABprapapp'	0.0985±0.0249'	0.0662±0.0190'	0.0186±0.0252'
ABprappa'	ABprappaa'	ABprappap'	0.0041±0.0249'	0.0103±0.0149'	0.0038±0.0194'
ABprappp'	ABprapppa'	ABprapppp'	-0.0196±0.0323'	-0.0220±0.0260'	-0.0025±0.0160'
ABprpaaa'	ABprpaaaa'	ABprpaaap'	0.1034±0.0439'	0.0621±0.0293'	-0.0144±0.0104'
ABprpaap'	ABprpaapa'	ABprpaapp'	-0.0706±0.0207'	-0.0455±0.0156'	0.0311±0.0121'
ABprpapa'	ABprpapaa'	ABprpapap'	-0.0817±0.0278'	-0.0541±0.0205'	0.0240±0.0211'
ABprpapp'	ABprpappa'	ABprpappp'	0.0241±0.0291'	0.0226±0.0233'	-0.0232±0.0163'
ABprppaa'	ABprppaaa'	ABprppaap'	-0.0938±0.0557'	-0.0663±0.0411'	0.0419±0.0183'
ABprppap'	ABprppapa'	ABprppapp'	0.0594±0.0320'	0.0354±0.0240'	-0.0351±0.0107'
ABprpppa'	ABprpppaa'	ABprpppap'	0.0579±0.0534'	0.0547±0.0385'	-0.0037±0.0114'
ABprpppp'	ABprppppa'	ABprppppp'	0.1198±0.0422'	0.0716±0.0241'	-0.0389±0.0191'
ABplaaaaa'	ABplaaaaaa'	ABplaaaaap'	-0.3492±0.0509'	-0.2444±0.0335'	0.1524±0.0357'
ABplaapaa'	ABplaapaaa'	ABplaapaap'	-0.2338±0.0735'	-0.1500±0.0432'	0.0773±0.0190'
ABplaapap'	ABplaapapa'	ABplaapapp'	-0.2481±0.0350'	-0.1528±0.0269'	0.1123±0.0288'
ABplapaaa'	ABplapaaaa'	ABplapaaap'	-0.1185±0.0408'	-0.0765±0.0306'	0.0386±0.0208'
ABplapppa'	ABplapppaa'	ABplapppap'	-0.1998±0.0293'	-0.1266±0.0199'	0.1443±0.0325'
ABplpaaaa'	ABplpaaaaa'	ABplpaaaap'	-0.0243±0.0504'	-0.0152±0.0338'	0.0384±0.0154'
ABplpaaap'	ABplpaaapa'	ABplpaaapp'	-0.1856±0.0627'	-0.1237±0.0453'	0.1315±0.0253'
ABplpaapa'	ABplpaapaa'	ABplpaapap'	-0.0050±0.0341'	0.0073±0.0240'	-0.0012±0.0178'
ABplpaapp'	ABplpaappa'	ABplpaappp'	0.0134±0.0398'	0.0309±0.0250'	0.0172±0.0298'
ABplpapaa'	ABplpapaaa'	ABplpapaap'	-0.0358±0.0210'	-0.0192±0.0119'	0.0199±0.0198'
ABplpapap'	ABplpapapa'	ABplpapapp'	0.0343±0.0479'	0.0209±0.0315'	-0.0110±0.0188'
ABplpappp'	ABplpapppa'	ABplpapppp'	0.0423±0.0679'	0.0198±0.0401'	-0.0145±0.0226'
ABplppaap'	ABplppaapa'	ABplppaapp'	-0.0243±0.0491'	-0.0162±0.0380'	0.0450±0.0137'
ABplppapp'	ABplppappa'	ABplppappp'	0.0162±0.0574'	-0.0003±0.0348'	-0.0568±0.0227'
ABplpppaa'	ABplpppaaa'	ABplpppaap'	0.0105±0.0562'	0.0076±0.0392'	0.0004±0.0161'
ABplppppa'	ABplppppaa'	ABplppppap'	-0.1596±0.0222'	-0.1058±0.0148'	0.0163±0.0146'
ABplppppp'	ABplpppppa'	ABplpppppp'	0.0479±0.0479'	0.0201±0.0320'	0.1182±0.0442'
ABpraaaaa'	ABpraaaaaa'	ABpraaaaap'	0.1360±0.0366'	0.0963±0.0231'	-0.1418±0.2558'
ABpraaapa'	ABpraaapaa'	ABpraaapap'	-0.0476±0.0384'	-0.0242±0.0258'	0.0598±0.0291'
ABpraaapp'	ABpraaappa'	ABpraaappp'	-0.3503±0.0435'	-0.2337±0.0293'	0.1783±0.0209'
ABpraapaa'	ABpraapaaa'	ABpraapaap'	-0.2443±0.0546'	-0.1584±0.0365'	0.0860±0.0211'
ABpraapap'	ABpraapapa'	ABpraapapp'	-0.1721±0.0345'	-0.1027±0.0267'	0.1212±0.0323'
ABprapaaa'	ABprapaaaa'	ABprapaaap'	-0.1579±0.0314'	-0.0973±0.0208'	0.0506±0.0167'
ABprapppa'	ABprapppaa'	ABprapppap'	-0.1813±0.0344'	-0.1161±0.0237'	0.1496±0.0247'
ABprpaaaa'	ABprpaaaaa'	ABprpaaaap'	-0.0139±0.0450'	-0.0062±0.0290'	0.0411±0.0214'
ABprpaaap'	ABprpaaapa'	ABprpaaapp'	-0.1523±0.0650'	-0.1049±0.0501'	0.1225±0.0216'
ABprpaapa'	ABprpaapaa'	ABprpaapap'	0.0130±0.0492'	0.0099±0.0259'	-0.0047±0.0327'
ABprpaapp'	ABprpaappa'	ABprpaappp'	0.0574±0.0636'	0.0522±0.0389'	0.0119±0.0136'
ABprpapaa'	ABprpapaaa'	ABprpapaap'	-0.0184±0.0321'	-0.0084±0.0216'	0.0038±0.0179'
ABprpapap'	ABprpapapa'	ABprpapapp'	0.0557±0.0227'	0.0394±0.0194'	-0.0094±0.0172'
ABprpappa'	ABprpappaa'	ABprpappap'	-0.0397±0.0688'	-0.0245±0.0437'	-0.0004±0.0167'
ABprpappp'	ABprpapppa'	ABprpapppp'	0.0192±0.0481'	0.0049±0.0322'	0.0345±0.0168'
ABprppaap'	ABprppaapa'	ABprppaapp'	-0.0388±0.0541'	-0.0302±0.0360'	0.0360±0.0188'
ABprppapa'	ABprppapaa'	ABprppapap'	0.1472±0.0506'	0.1110±0.0314'	-0.1277±0.0285'
ABprppapp'	ABprppappa'	ABprppappp'	0.0433±0.0278'	0.0199±0.0138'	-0.0625±0.0212'
ABprpppaa'	ABprpppaaa'	ABprpppaap'	0.0654±0.0644'	0.0516±0.0438'	-0.0108±0.0277'
ABprppppa'	ABprppppaa'	ABprppppap'	-0.1227±0.0857'	-0.0800±0.0531'	0.0318±0.0327'
ABprppppp'	ABprpppppa'	ABprpppppp'	0.1039±0.0402'	0.0638±0.0228'	0.0877±0.0322'
MS'	MSa'	MSp'	-0.0181±0.0193'	-0.0193±0.0165'	-0.0083±0.0155'
MSa'	MSaa'	MSap'	0.1368±0.0215'	0.0591±0.0124'	-0.0316±0.0098'
MSaa'	MSaaa'	MSaap'	0.0352±0.0258'	0.0229±0.0226'	-0.0003±0.0138'
MSaaa'	MSaaaa'	MSaaap'	0.0720±0.0294'	0.0449±0.0255'	-0.0425±0.0080'
MSaaaa'	MSaaaaa'	MSaaaap'	0.0451±0.0352'	0.0160±0.0220'	-0.0312±0.0181'
MSp'	MSpa'	MSpp'	0.1771±0.0359'	0.1037±0.0342'	-0.0205±0.0281'
MSap'	MSapa'	MSapp'	0.0968±0.0347'	0.0749±0.0318'	0.0002±0.0134'
MSaap'	MSaapa'	MSaapp'	0.2790±0.0421'	0.1824±0.0220'	-0.1021±0.0235'
MSaaap'	MSaaapa'	MSaaapp'	0.5750±0.0335'	0.4129±0.0244'	-0.2905±0.0425'
MSaaaap'	MSaaaapa'	MSaaaapp'	0.1134±0.0336'	0.0704±0.0190'	-0.0776±0.0140'
MSpa'	MSpaa'	MSpap'	0.0016±0.0111'	0.0222±0.0172'	0.0125±0.0134'
MSapa'	MSapaa'	MSapap'	-0.0754±0.0236'	-0.0454±0.0210'	-0.0020±0.0166'
MSaapa'	MSaapaa'	MSaapap'	0.2914±0.0199'	0.2027±0.0157'	-0.0816±0.0297'
MSaaapa'	MSaaapaa'	MSaaapap'	0.0972±0.0542'	0.0639±0.0414'	-0.0399±0.0183'
MSpp'	MSppa'	MSppp'	0.0322±0.0269'	0.0222±0.0199'	-0.0122±0.0180'
MSapp'	MSappa'	MSappp'	-0.0897±0.0355'	-0.0571±0.0254'	-0.0172±0.0128'
MSaapp'	MSaappa'	MSaappp'	-0.4572±0.0299'	-0.3334±0.0186'	0.0498±0.0380'
MSpaa'	MSpaaa'	MSpaap'	0.3152±0.0415'	0.2169±0.0305'	-0.0910±0.0307'
MSapaa'	MSapaaa'	MSapaap'	0.0845±0.0325'	0.0409±0.0275'	-0.1640±0.0188'
MSaapaa'	MSaapaaa'	MSaapaap'	-0.0836±0.0419'	-0.0654±0.0317'	0.0562±0.0254'
MSpap'	MSpapa'	MSpapp'	0.2165±0.0244'	0.1433±0.0199'	-0.1046±0.0206'
MSapap'	MSapapa'	MSapapp'	0.0643±0.0498'	0.0301±0.0322'	-0.0775±0.0249'
MSppa'	MSppaa'	MSppap'	-0.1319±0.0151'	-0.1028±0.0140'	0.0104±0.0187'
MSappa'	MSappaa'	MSappap'	0.1231±0.0177'	0.0805±0.0200'	-0.0512±0.0180'
MSppp'	MSpppa'	MSpppp'	-0.0631±0.0154'	-0.0349±0.0159'	-0.0289±0.0269'
MSappp'	MSapppa'	MSapppp'	0.0319±0.0308'	0.0156±0.0305'	-0.0207±0.0260'
MSpaaa'	MSpaaaa'	MSpaaap'	-0.0129±0.0333'	-0.0105±0.0243'	-0.0213±0.0188'
MSpapa'	MSpapaa'	MSpapap'	0.2556±0.0295'	0.1669±0.0179'	-0.0865±0.0145'
MSpapp'	MSpappa'	MSpappp'	-0.3811±0.0601'	-0.2718±0.0476'	0.1227±0.0309'
MSppaa'	MSppaaa'	MSppaap'	0.2183±0.0398'	0.1343±0.0215'	-0.1835±0.0158'
MSppap'	MSppapa'	MSppapp'	0.0522±0.0091'	0.0171±0.0081'	-0.0900±0.0233'
MSpppa'	MSpppaa'	MSpppap'	0.1139±0.0393'	0.0853±0.0273'	-0.0308±0.0247'
MSpppp'	MSppppa'	MSppppp'	0.0598±0.0337'	0.0413±0.0241'	-0.0395±0.0177'
MSpaaaa'	MSpaaaaa'	MSpaaaap'	-0.4369±0.0320'	-0.2933±0.0212'	0.2752±0.0182'
MSpaaap'	MSpaaapa'	MSpaaapp'	-0.3522±0.0504'	-0.2322±0.0381'	0.1895±0.0222'
MSpaapa'	MSpaapaa'	MSpaapap'	-0.4084±0.0425'	-0.2978±0.0291'	0.1771±0.0334'
MSpapaa'	MSpapaaa'	MSpapaap'	-0.0767±0.0247'	-0.0603±0.0259'	0.0451±0.0135'
MSpapap'	MSpapapa'	MSpapapp'	-0.3449±0.0746'	-0.2256±0.0561'	0.2921±0.0199'
E'	Ea'	Ep'	0.0509±0.0244'	0.0282±0.0148'	-0.0330±0.0297'
Ea'	Eal'	Ear'	-0.0013±0.0191'	0.0070±0.0225'	-0.0131±0.0157'
Eal'	Eala'	Ealp'	0.1041±0.0390'	0.0955±0.0292'	-0.0089±0.0177'
Ep'	Epl'	Epr'	0.0048±0.0479'	0.0086±0.0470'	0.0001±0.0085'
Ear'	Eara'	Earp'	0.0775±0.0276'	0.0735±0.0204'	-0.0164±0.0179'
Epl'	Epla'	Eplp'	0.0507±0.0189'	0.0580±0.0154'	-0.0447±0.0352'
Epr'	Epra'	Eprp'	0.0265±0.0374'	0.0416±0.0198'	-0.0494±0.0211'
C'	Ca'	Cp'	-0.0463±0.0287'	0.0094±0.0208'	0.0069±0.0206'
Ca'	Caa'	Cap'	0.1499±0.0466'	0.1289±0.0286'	-0.0634±0.0245'
Caa'	Caaa'	Caap'	0.5505±0.0568'	0.4036±0.0448'	-0.0993±0.0288'
Caaa'	Caaaa'	Caaap'	-0.0022±0.0375'	0.0120±0.0173'	0.0328±0.0015'
Cp'	Cpa'	Cpp'	0.2445±0.0350'	0.1693±0.0216'	-0.0517±0.0202'
Cap'	Capa'	Capp'	0.0073±0.0317'	0.0209±0.0262'	0.0765±0.0172'
Caap'	Caapa'	Caapp'	-0.4212±0.0410'	-0.3091±0.0290'	0.3813±0.0380'
Cpa'	Cpaa'	Cpap'	0.1569±0.0542'	0.1207±0.0382'	-0.0190±0.0209'
Capa'	Capaa'	Capap'	0.0013±0.0316'	0.0055±0.0212'	-0.0088±0.0185'
Cpp'	Cppa'	Cppp'	-0.0056±0.0352'	0.0040±0.0235'	0.0952±0.0192'
Capp'	Cappa'	Cappp'	0.0187±0.0397'	0.0207±0.0322'	-0.0123±0.0247'
Cpaa'	Cpaaa'	Cpaap'	0.0173±0.0817'	0.0293±0.0468'	0.0386±0.0208'
Capaa'	Capaaa'	Capaap'	0.0049±0.0444'	-0.0073±0.0308'	-0.0684±0.0311'
Cpap'	Cpapa'	Cpapp'	0.2281±0.0463'	0.1509±0.0288'	0.0124±0.0310'
Capap'	Capapa'	Capapp'	-0.0850±0.0513'	-0.0669±0.0321'	-0.0249±0.0169'
Cppa'	Cppaa'	Cppap'	-0.0274±0.0116'	-0.0010±0.0111'	-0.0209±0.0235'
Cappa'	Cappaa'	Cappap'	-0.0090±0.0363'	-0.0049±0.0234'	-0.0634±0.0233'
Cppp'	Cpppa'	Cpppp'	0.0473±0.0218'	0.0374±0.0190'	-0.0231±0.0148'
Cappp'	Capppa'	Capppp'	-0.0236±0.0531'	-0.0204±0.0320'	-0.0779±0.0273'
Cppaa'	Cppaaa'	Cppaap'	0.0126±0.0400'	0.0007±0.0260'	-0.0659±0.0207'
Cppap'	Cppapa'	Cppapp'	-0.0660±0.0470'	-0.0606±0.0301'	-0.0587±0.0221'
Cpppa'	Cpppaa'	Cpppap'	0.0250±0.0435'	0.0220±0.0273'	-0.0805±0.0142'
Cpppp'	Cppppa'	Cppppp'	0.0107±0.0489'	0.0064±0.0364'	-0.0862±0.0430'
D'	Da'	Dp'	-0.0254±0.0278'	-0.0109±0.0177'	-0.0073±0.0306'
Da'	Daa'	Dap'	-0.1314±0.0452'	-0.0646±0.0367'	0.0546±0.0246'
Daa'	Daaa'	Daap'	-0.0232±0.0677'	-0.0037±0.0465'	-0.0061±0.0209'
Dp'	Dpa'	Dpp'	-0.1497±0.0375'	-0.0820±0.0311'	0.0405±0.0178'
Dap'	Dapa'	Dapp'	-0.2450±0.0774'	-0.1658±0.0497'	0.0194±0.0270'
Dpa'	Dpaa'	Dpap'	-0.1077±0.1326'	-0.0606±0.0865'	-0.0174±0.0280'
Dpp'	Dppa'	Dppp'	-0.2815±0.0588'	-0.1807±0.0577'	0.0296±0.0201'
EMS'	MS'	E'	0.0688±0.0445'	0.0614±0.0291'	-0.0449±0.0305'
P2'	C'	P3'	0.3671±0.0226'	0.2706±0.0375'	-0.1424±0.0191'
P3'	D'	P4'	0.4153±0.0282'	0.2978±0.0236'	-0.3303±0.0301'
